# Supplementary material for: Integrated Untargeted Metabolome, Full-Length Sequencing and Transcriptome Analyses Reveal the Mechanism of Flavonoid Biosynthesis in Blueberry (Vaccinium spp.) Fruit
Source: MDPI journal article supplement (doi:10.3390/ijms25084137), 2024-04-09
Supplement: s1 [file s1]

## Flavonoids and Phenylpropanoids

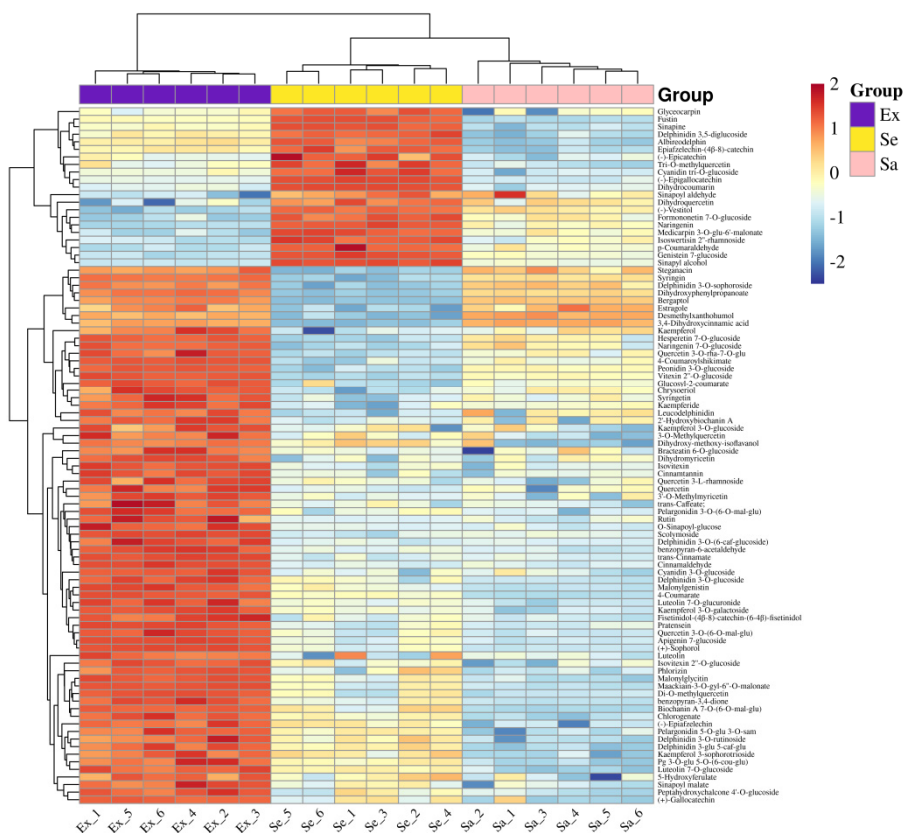

Figure S1. Heatmap showing relative abundance of flavonoids and phenylpropanoids in Ex, Se and Sa samples. Red and blue indicate up-regulation and down-regulation, respectively.
