# Supplementary material for: Integrated Untargeted Metabolome, Full-Length Sequencing and Transcriptome Analyses Reveal the Mechanism of Flavonoid Biosynthesis in Blueberry (Vaccinium spp.) Fruit
Source: Int J Mol Sci. 2024 Apr 9;25(8):4137. doi: 10.3390/ijms25084137 (PMC11050320; doi:10.3390/ijms25084137)
Supplement: Supplementary file 1 [file ijms-25-04137-s001.zip]

Archive with 12 entries (12 files):
- Figure S1. Heatmap showing relative abundance of flavonoids and phenylpropanoids in Ex, Se and Sa samples.pdf
- Figure S2. Heatmap of the contents of 30 anthocyanins in blueberry fruit tissues.pdf
- Figure S3. Gene structural information of full-length transcriptome..pdf
- Table S1_Classification and relative expression abundance of DEMs in blueberry.xlsx
- Table S2. KEGG enrichment analysis results of DEMs.xlsx
- Table S3. All the clean reads matched the genome of blueberry.xlsx
- Table S4. GO enrichment analysis results of DEGs.xlsx
- Table S5. Metabolite categories related to DEGs enriched in GO terms..xlsx
- Table S6. KEGG enrichment analysis results of DEGs.xlsx
- Table S7.DEGs and DEMs involved in flavonoid biosynthesis pathway.xlsx
- Table S8. Promoter prediction and identification of DEFs.xlsx
- Table S9. Primer sequences for qRT-PCR.xlsx
