# Supplementary material for: Integrated Untargeted Metabolome, Full-Length Sequencing and Transcriptome Analyses Reveal the Mechanism of Flavonoid Biosynthesis in Blueberry (Vaccinium spp.) Fruit
Source: Int J Mol Sci. 2024 Apr 9;25(8):4137. doi: 10.3390/ijms25084137 (PMC11050320; doi:10.3390/ijms25084137)
Supplement: Supplementary file 1 [file ijms-25-04137-s001.zip › Table S1_Classification and relative expression abundance of DEMs in blueberry.xlsx]

## Sheet: Table S1
Table S1. Classification and relative expression abundance of DEMs in blueberry
Feature	name	Class A	Class B	Class C	keggPathway	Ex vs Sa_Log2FC	Ex vs Se_Log2FC	Se vs Sa_Log2FC	QC_1	QC_2	QC_3	QC_4	QC_5	QC_6	Ex_1	Ex_2	Ex_3	Ex_4	Ex_5	Ex_6	Sa_1	Sa_2	Sa_3	Sa_4	Sa_5	Sa_6	Se_1	Se_2	Se_3	Se_4	Se_5	Se_6
M444T455_pos	Ancistrotectorine	Alkaloids	Alkaloids derived by amination reactions	Acetate derived alkaloids	-	-3.14502	-5.25366	2.10863	1903.23	1903.23	1903.23	1903.23	1903.23	1903.23	187.729	182.028	235.007	238.036	250.105	346.898	471.111	939.16	1823.54	2672.18	3270.91	3559.6	7522.87	7209.85	9936.33	8940.02	11807.5	9513.76
M453T168_pos	Solanocapsine	Alkaloids	Alkaloids derived by amination reactions	Steroid alkaloids	-	-1.94992	2.29969	-4.24961	8977.97	8492.02	10203.9	8781.76	8330.45	9610.42	4512.77	5315.4	5100.73	3011.13	10544.9	10275.9	17917.7	28786.6	22665.6	24631.3	26902.1	28850.6	2128.12	1113.53	1136.39	767.666	1769.79	957.079
M376T32_neg	Karakoline	Alkaloids	Alkaloids derived by amination reactions	Terpenoid alkaloids	-	-0.0223518	-2.81288	2.79053	5729.51	5252.24	3957.25	4872.05	5172.21	4919.78	1344.55	757.162	1583.45	1062.81	1095.65	1187.51	1768.32	1125.78	740.255	1084.74	954.701	1467.12	9437.94	7221.56	8176.39	8282.39	7645.31	8643.41
M712T426_2_pos	Elatine	Alkaloids	Alkaloids derived by amination reactions	Terpenoid alkaloids	-	-2.54686	-7.98071	5.43385	3740.6	3467.37	3715.58	3386.42	3736.72	3600.14	30.1888	32.5694	5.5351	266.271	34.7072	19.1346	171.61	383.18	277.348	470.808	545.644	421.109	17345.4	14599.7	18095.6	15806.6	15972.7	16291.6
M630T500_2_pos	Indaconitine	Alkaloids	Alkaloids derived by amination reactions	Terpenoid alkaloids	-	-0.795372	-5.53115	4.73577	1055.11	1052.63	1178.7	1096.43	1473.37	930.577	114.216	93.0718	83.2838	109.136	54.729	58.2142	157.35	141.322	81.0112	189.561	138.706	181.768	3871.8	2296.79	5206.09	3901.03	4404.89	4025.66
M695T301_neg	Delavaine_A	Alkaloids	Alkaloids derived by amination reactions	Terpenoid alkaloids	-	-1.61565	2.27208	-3.88773	4291.61	4291.61	4291.61	4291.61	4291.61	4291.61	3443.86	709.197	3132.01	4504.42	4163.79	4628.04	9014.65	7820.27	10052.5	8415.67	13790.9	13977.5	309.813	412.73	963.572	422.985	877.363	1274.51
M713T296_neg	Septentrionine	Alkaloids	Alkaloids derived by amination reactions	Terpenoid alkaloids	-	1.04953	4.91342	-3.86389	11330.2	11187.8	11150.6	11373.7	12111.2	10795.8	20074.4	15654.7	20604.8	19041.9	23105.7	20867.9	8419.98	9837.84	9132.71	10323	9314.84	10632.4	2265.21	636.757	246.417	274.257	325.575	212.135
M162T337_pos	Picolinic acid	Alkaloids	Alkaloids derived from lysine	Piperidine alkaloids	ko00380(Tryptophan metabolism);ko01100(Metabolic pathways);	-3.01589	-0.689055	-2.32684	2219.31	1766.23	1183.2	2154.17	1688.08	1715.45	611.612	746.054	287.387	529.708	654.218	430.678	3800.6	5679.34	4933.28	4051.21	3918.7	3982.94	1118.76	763.645	786.242	778.791	791.827	1016.05
M331T316_neg	Santiaguine	Alkaloids	Alkaloids derived from lysine	Piperidine alkaloids	-	-2.74119	-2.50632	-0.234872	7801.41	6793.12	8309.92	6768.68	9684.67	6713.2	1479.93	2735.74	1314.38	1521.8	3095.73	3233.64	4210.62	14619.7	19180	16970.8	11554.8	22933.7	9718.45	11881.3	11259.8	14160.7	16167.5	12839.9
M143T303_neg	Girgensonine	Alkaloids	Alkaloids derived from lysine	Piperidine alkaloids	-	-1.35718	1.07039	-2.42757	33196.3	33196.3	33196.3	33196.3	33196.3	33196.3	13790.5	33021.2	47022.5	56695.7	67213.4	60051.1	92880.6	98246.5	159291	104068	178229	78949	16268.8	17244.5	28420	15131.6	27837.9	27379.8
M445T224_pos	Argentine	Alkaloids	Alkaloids derived from lysine	Quinolizidine alkaloids	-	-2.37925	1.04862	-3.42787	6318.66	5987.48	4835.71	6352.02	5689.21	5753.75	2402.54	2700.45	3357.5	2792.48	3246.56	3799.87	17630.4	21984	16612.3	16452.6	15756.3	6770.45	2243.64	1476.68	805.966	1740.07	1215.78	1364.38
M429T257_neg	Cinegalline	Alkaloids	Alkaloids derived from lysine	Quinolizidine alkaloids	-	3.05652	5.11942	-2.0629	20884.1	19593.8	15437.4	21274.7	16740.4	19772.5	30693.1	39639.4	31699.4	45113.9	39618.6	36125.3	2619.62	4990.96	3495.12	4788.54	5866.44	5030.06	840.623	888.369	1237.93	988.524	1300.7	1155.8
M138T35_neg	6-Hydroxynicotinate	Alkaloids	Alkaloids derived from nicotinic acid	Pyridine alkaloids	ko00760(Nicotinate and nicotinamide metabolism);	4.88949	4.58825	0.301231	30762.6	30762.6	30762.6	30762.6	30762.6	30762.6	124058	97375.8	117383	81659.2	84486.5	87401.2	4940.35	2729.46	2955.95	3033.6	3057.35	3268.4	4787.71	4835.43	4065.86	3329.37	4451.62	3155.56
M334T166_neg	Senecionine	Alkaloids	Alkaloids derived from ornithine	Pyrrolizidine alkaloids	ko00960(Tropane, piperidine and pyridine alkaloid biosynthesis);ko01110(Biosynthesis of secondary metabolites);	-1.30102	2.22368	-3.5247	13573.9	13573.9	13573.9	13573.9	13573.9	13573.9	10760.4	11631.2	6982.87	9540.98	9761.88	8200.06	34250.7	23177.7	18705	19113.5	21282.3	23618.3	1887.54	1152.65	1684.87	2300.73	2438.54	2712.79
M350T190_neg	Anacrotine	Alkaloids	Alkaloids derived from ornithine	Pyrrolizidine alkaloids	-	-0.747514	2.81777	-3.56528	23160	23160	23160	23160	23160	23160	34120.7	32369.6	29652.8	28431.4	25500.8	29113.2	62320.4	51011.4	58358.4	40567	43966.4	44615.5	4248.27	5372.69	3752.88	4082.73	4395.79	3561.89
M262T461_pos	Macrophylline	Alkaloids	Alkaloids derived from ornithine	Pyrrolizidine alkaloids	-	-1.65937	-2.65635	0.996986	3119.51	3119.51	3119.51	3119.51	3119.51	3119.51	2985.6	903.27	1114.66	941.656	1570.18	1662.7	2896.9	3285.46	3828.3	6476.88	7304.88	5199.07	11793.8	9745.5	7182.42	7888.38	11239	10012.9
M217T219_pos	Tussilagine	Alkaloids	Alkaloids derived from ornithine	Pyrrolizidine alkaloids	-	-0.292132	-2.46697	2.17484	3966.07	3966.07	3966.07	3966.07	3966.07	3966.07	3775.94	2593.03	1128.5	1155.2	2245.01	1995.3	2299.86	3475.41	2467.34	2062.97	3221.91	2259.3	17590	11737.3	8358.26	8621.31	13061.5	11914.5
M215T218_neg	Ecgonine_methyl_ester	Alkaloids	Alkaloids derived from ornithine	Tropane alkaloids	ko01100(Metabolic pathways);ko01110(Biosynthesis of secondary metabolites);ko00960(Tropane, piperidine and pyridine alkaloid biosynthesis);	-2.25372	-5.21741	2.9637	3182.38	3182.38	3182.38	3182.38	3182.38	3182.38	584.258	75.0045	483.115	586.503	183.073	648.272	1562.72	1960.24	2149.68	2244.81	1837.27	2455.27	10509.1	15691.5	16009.5	16027.1	18162.4	18853
M201T263_neg	Ecgonine	Alkaloids	Alkaloids derived from ornithine	Tropane alkaloids	ko00960(Tropane, piperidine and pyridine alkaloid biosynthesis);	-2.98716	-2.85388	-0.133276	13779.6	13779.6	13779.6	13779.6	13779.6	13779.6	2427.77	2739.99	3315.91	1676.46	3751.61	3710.89	16644.9	27232.1	21276.2	23596.5	45709.2	5272.75	12204.1	20653.5	22203.3	23539.4	25133	23668.3
M344T462_pos	(6S)-Hydroxyhyoscyamine	Alkaloids	Alkaloids derived from ornithine	Tropane alkaloids	ko00960(Tropane, piperidine and pyridine alkaloid biosynthesis);ko01100(Metabolic pathways);ko01110(Biosynthesis of secondary metabolites);	0.323285	-2.54437	2.86765	1657.24	1657.24	1657.24	1657.24	1657.24	1657.24	824.362	906.05	1335.85	1577.85	1376.14	1079.14	671.658	973.182	1188.16	1267.86	469.776	1103.53	4327.47	8582.74	11941.5	6700.24	5016.02	4846.44
M149T274_pos	DL-3-Phenyllactic acid	Alkaloids	Alkaloids derived from ornithine	Tropane alkaloids	ko00960(Tropane, piperidine and pyridine alkaloid biosynthesis);ko01110(Biosynthesis of secondary metabolites);	0.124366	-2.90373	3.0281	2821.58	3151.13	2714.88	2812.36	2926.8	2881.55	1098.94	953.042	822.351	1601.67	1413.73	1381.84	1031.17	1053.85	1226.22	1066.19	1063.27	1230.28	9576.3	7908.55	9572.96	8503.08	9154.27	9702.43
M216T399_pos	Cichorine	Alkaloids	Alkaloids derived from ornithine	Tropane alkaloids	-	-1.31242	-3.27131	1.95889	1227.56	1566.56	1079.91	1233.95	1304.8	1273.76	367.085	389.301	373.766	469.883	456.159	547.434	624.241	1001.05	1254.89	1011.82	1315.72	1258.58	4544.05	4168.16	4608.39	3947.95	4189.82	3680.18
M308T324_pos	Strobamine	Alkaloids	Alkaloids derived from ornithine	Tropane alkaloids	-	-0.665711	1.78253	-2.44824	8285.5	7782.18	5021.41	8842.91	6815.89	7073.42	14317.6	12526.5	7168.54	6406.47	5417.25	5484.73	12585.8	17760.7	14275.3	12277.3	12959.2	11554.9	3574.93	2734.55	1720.69	2561.54	1946.75	2379.22
M277T183_neg	Cochlearine	Alkaloids	Alkaloids derived from ornithine	Tropane alkaloids	-	-4.30354	-2.19886	-2.10468	10646.9	10646.9	10646.9	10646.9	10646.9	10646.9	1704.29	1950.6	2340.89	2494.74	2609.51	3816.62	39345	46311.1	53365.6	58447.3	53408.8	43677.7	7141.92	9093.9	12551.8	13152.7	14518.4	12026.3
M284T391_pos	Tropacocaine	Alkaloids	Alkaloids derived from ornithine	Tropane alkaloids	-	-1.24873	-4.62163	3.37289	2932.13	2580.75	2714.59	2608.18	2983.14	2638.64	409.762	437.59	396.077	401.16	471.25	420.008	992.669	1054.94	879.778	1041.5	896.968	1160.14	11484.3	8924.73	10778.8	10840.2	11126.7	9272.08
M287T255_neg	Apoatropine	Alkaloids	Alkaloids derived from ornithine	Tropane alkaloids	-	-2.41981	-4.10217	1.68236	10268	9356.95	10058.5	9926.04	9921.64	9881.36	898.24	1512.87	1016.03	1651.48	1815.92	1613.31	4593.95	9051.68	5191.78	8490.22	9176.88	9020.94	23392.4	24142.1	20772.2	23320.5	24345.2	30142.8
M361T260_neg	Acronycine	Alkaloids	Alkaloids derived from tryptophan and anthranilic acid	Acridone alkaloids	ko00996(Biosynthesis of various alkaloids);ko01063(Biosynthesis of alkaloids derived from shikimate pathway);ko01110(Biosynthesis of secondary metabolites);	0.723132	2.67637	-1.95323	6353.39	7067.28	5795.92	6425.23	6091.23	6581.8	14880.8	20822.8	17177.8	16444.3	15580.1	17890.2	5789.97	14881.5	4082.03	12378.4	13459	11680.9	2064.5	3162.55	2266.47	3262.05	3281.2	2044.1
M378T302_neg	Atalaphylline	Alkaloids	Alkaloids derived from tryptophan and anthranilic acid	Acridone alkaloids	-	-0.00264678	4.10937	-4.11202	46593.3	54687.2	49834.1	56317.7	45436.1	52505.7	78654.7	67307.4	80712.7	69186.8	76755.4	69584.8	87113.5	66042.1	81030.5	67159.6	75659.4	66008.8	2966.44	3519.72	2896.86	6363.49	4622.66	5250.69
M364T174_neg	Serpentine	Alkaloids	Alkaloids derived from tryptophan and anthranilic acid	Indole alkaloids	ko01110(Biosynthesis of secondary metabolites);ko00901(Indole alkaloid biosynthesis);	-1.05081	1.44448	-2.49529	5624.94	4601.36	5991.01	5444.15	5350.16	5358.12	4096.52	2796.31	4019.23	3251.27	4577.58	5921.94	9430.97	6733.34	7985.11	7181.68	9925	9837.71	924.52	1507.59	1721.23	1399.23	1704.42	1804.73
M551T258_pos	Raucaffricine	Alkaloids	Alkaloids derived from tryptophan and anthranilic acid	Indole alkaloids	ko01110(Biosynthesis of secondary metabolites);ko00901(Indole alkaloid biosynthesis);	-0.424086	2.12467	-2.54876	5780.48	7738.73	6198.04	7763.36	6213.77	6613.42	7259.55	9470.25	7148.86	9137.77	8191.72	7139.05	12462.1	10030.9	10310.3	10646.2	12583.5	8835.5	1665.27	1705.09	1697.23	2078.55	1510.11	2429.9
M390T389_pos	4,21-Dehydrogeissoschizine	Alkaloids	Alkaloids derived from tryptophan and anthranilic acid	Indole alkaloids	ko00901(Indole alkaloid biosynthesis);ko01100(Metabolic pathways);ko01110(Biosynthesis of secondary metabolites);	2.09052	1.31344	0.77708	2256.04	2000.98	2412.3	2089.9	2643.12	2018.4	4975.43	5372.47	6677.14	5781.14	5217.71	5012.14	569.242	1456.77	1632.73	1171.9	1377.37	1548.71	1029.81	1859.27	3695.07	1308.35	1812.1	3587.79
M364T300_neg	Alstonine	Alkaloids	Alkaloids derived from tryptophan and anthranilic acid	Indole alkaloids	ko00901(Indole alkaloid biosynthesis);ko01110(Biosynthesis of secondary metabolites);	2.22029	4.62903	-2.40874	20489.7	20489.7	20489.7	20489.7	20489.7	20489.7	39158.4	33894.9	39181.4	44646.2	53139.6	49965	9146.7	9569.46	5761.41	11422.6	11505.9	8386.46	1168.65	2284.06	1741.06	895.649	2815.54	1601.92
M232T462_pos	Harmaline	Alkaloids	Alkaloids derived from tryptophan and anthranilic acid	Indole alkaloids	ko00901(Indole alkaloid biosynthesis);ko01063(Biosynthesis of alkaloids derived from shikimate pathway);	-1.23385	-5.60293	4.36909	6792.75	6792.75	6792.75	6792.75	6792.75	6792.75	1182.56	939.62	416.478	663.507	520.664	960.466	1533.72	2207.63	1342.19	4530.43	1287.69	113.136	59720.7	39327.3	35631.9	29526.1	38746.2	24664
M143T256_neg	Tetrahydroharmine	Alkaloids	Alkaloids derived from tryptophan and anthranilic acid	Indole alkaloids	ko00901(Indole alkaloid biosynthesis);ko01063(Biosynthesis of alkaloids derived from shikimate pathway);	-1.84785	1.0165	-2.86435	57565.1	57565.1	57565.1	57565.1	57565.1	57565.1	34860.8	32752.2	39761.8	49107.6	22353	41363	136787	115585	129744	142879	127512	140125	22622.5	8359.35	13619.4	27477.7	18243.5	18524.6
M269T172_pos	Ellipticine	Alkaloids	Alkaloids derived from tryptophan and anthranilic acid	Indole alkaloids	-	-6.11073	-7.6685	1.55777	234276	234276	234276	234276	234276	234276	6725.73	6680.63	4665.57	5665.83	3874.66	4946.23	323957	390486	398734	367159	392925	376726	1.34014e+06	955555	1.17903e+06	912010	1.1015e+06	1.1357e+06
M280T316_neg	Perlolyrine	Alkaloids	Alkaloids derived from tryptophan and anthranilic acid	Indole alkaloids	-	0.147936	2.7687	-2.62077	57395.5	57395.5	57395.5	57395.5	57395.5	57395.5	90995.9	129036	107505	70114.8	60055.1	67037.1	108214	104225	78090.2	49636.3	67499.5	65936.9	13619.8	15812.6	9393.8	9641.49	8586.44	19944.8
M601T250_pos	Deserpidine	Alkaloids	Alkaloids derived from tryptophan and anthranilic acid	Indole alkaloids	-	-0.674111	1.46028	-2.13439	4232.78	3987.45	4803.38	2944.96	5125.88	3983.45	1507.18	7106.8	1358.7	9503.53	10905.7	2425.19	6173.33	8161.26	12148.1	11780.1	6383.1	7701.67	1671.17	2037.78	1738.84	2002.44	2279.02	2193.56
M271T447_neg	Bleekerine	Alkaloids	Alkaloids derived from tryptophan and anthranilic acid	Indole alkaloids	-	-1.15138	-3.62523	2.47386	1978.6	1922.98	1850.7	1933.09	1921.02	1922.76	714.276	952.187	905.063	672.735	714.862	723.737	1861.34	1906.86	2178.18	1568.26	1794.03	1093.17	10434.1	9770.02	9270.71	9929.34	10168.7	8212.2
M362T39_neg	(-)-Chimonanthine	Alkaloids	Alkaloids derived from tryptophan and anthranilic acid	Pyrroloindole alkaloids	-	5.17176	4.09531	1.07646	5795.91	5795.91	5795.91	5795.91	5795.91	5795.91	352871	339364	573639	427198	369754	389525	9359.49	13761.6	12700.6	12813.2	9920.42	9478.88	17630.6	28431.4	29966.6	30216.9	23122.3	14106.1
M314T40_pos	Eseridine	Alkaloids	Alkaloids derived from tryptophan and anthranilic acid	Pyrroloindole alkaloids	-	1.87014	3.12223	-1.25209	11985.5	11744.4	14853.1	11905.8	11571.9	13299.7	31000.6	24107.9	30501.6	27268.9	28366.9	30187.9	10974.9	6853.98	5979.45	6768.31	6514.17	9804.49	3892.55	2271.6	2887.97	2961.73	2173.91	5500.68
M303T309_pos	Glycosminine	Alkaloids	Alkaloids derived from tryptophan and anthranilic acid	Quinazoline alkaloids	-	3.79857	3.93494	-0.136374	51270.7	48955	78142.7	46575.1	56392.6	57753.6	181420	209182	105773	182506	125903	195271	464.899	16489.4	3351.4	23736.7	5518.23	22308.2	12239.3	10918.6	11280.7	10305.3	10161.1	10481.5
M340T200_pos	Febrifugine	Alkaloids	Alkaloids derived from tryptophan and anthranilic acid	Quinazoline alkaloids	-	1.44926	2.30213	-0.852874	6847.58	6981.04	5735.18	7348.52	6421.91	6587.5	10658.6	5850.32	9174.32	5906.18	8483.92	6238.26	3313.08	3598.54	2672.07	2465.88	2297.39	2612.79	2074.1	1183.9	1959.81	1122.01	1227.7	1822.76
M286T299_neg	Rutaecarpine	Alkaloids	Alkaloids derived from tryptophan and anthranilic acid	Quinazoline alkaloids	-	0.809526	2.52975	-1.72022	2157.98	1601.85	2579.5	2323.41	1877.14	2148.08	978.284	2860.47	3636.57	3245.06	3058.47	4744.79	2618.14	1943.89	1731.91	1155.03	1419.21	1700.85	365.713	137.699	813.173	264.182	271.805	1355.14
M331T40_pos	Angustine	Alkaloids	Alkaloids derived from tryptophan and anthranilic acid	Quinoline alkaloids	-	2.07395	2.99743	-0.923483	40723.7	38509	41661.8	40058.6	40149.9	40286	106128	94437.9	125229	102051	104765	100792	37935.6	25979.1	23330.3	26501.1	18389.9	18302.5	14048.9	11761.5	17253.6	14032.3	11480.2	10739.7
M305T262_neg	Balfourodine	Alkaloids	Alkaloids derived from tryptophan and anthranilic acid	Quinoline alkaloids	-	-0.844705	2.2503	-3.09501	21961.9	20682.7	20829.7	19525.6	21626	21043	25288.8	26218.9	25876.1	25005.1	26029.1	27638.2	51329.4	36757.3	51491.8	46675.1	45654.5	48352.7	4604.2	6055.89	2544.85	6588.9	6441.96	6564.03
M282T261_pos	Lemobiline	Alkaloids	Alkaloids derived from tryptophan and anthranilic acid	Quinoline alkaloids	-	-2.17266	1.80354	-3.9762	17150	18259.5	17427.8	17589.4	17571.5	17605.3	11250.3	8170	5963.47	8504.16	6035.36	9910.17	30011.9	50493.9	31988.2	37432.6	33562.9	41187.2	3714.01	2738.63	2352.91	2681.2	2346.05	443.066
M291T60_pos	Hydroquinidine	Alkaloids	Alkaloids derived from tryptophan and anthranilic acid	Quinoline alkaloids	-	-0.0407991	2.83092	-2.87172	25000.4	9386.23	20691.3	21202.7	21665	14986.1	21728.2	36740.4	58856.8	28686.7	30906.5	63865.6	129806	28427	15503	25602.7	21275.8	27076.6	6211.21	5139	5753.1	4705.92	5826.05	6205.12
M504T253_pos	Haplodimerine	Alkaloids	Alkaloids derived from tryptophan and anthranilic acid	Quinoline alkaloids	-	-1.08715	1.03733	-2.12448	4043.49	5580.03	4366.75	5306.96	4451.02	4660.57	2751.28	2732.86	5336.94	5784.53	5972.42	6489.11	11171.1	11650.2	9555.05	10789.9	8836.28	9751.56	1079.37	2529.79	2753.36	2422.38	3098.37	2279.03
M409T36_pos	Glycoperine	Alkaloids	Alkaloids derived from tryptophan and anthranilic acid	Quinoline alkaloids	-	0.0185092	-2.18854	2.20705	13206.5	13206.5	13206.5	13206.5	13206.5	13206.5	8984.01	10233.1	9172.78	10883.9	9132	11638.6	35173.2	4549.94	4408.08	3781.14	6465.17	4901.52	54022.5	38447.3	55240	40661.7	37356.1	47981.4
M261T195_neg	Haplopine	Alkaloids	Alkaloids derived from tryptophan and anthranilic acid	Quinoline alkaloids	-	-0.0777862	2.58367	-2.66145	33686.6	33837	41295.3	37854	33948.7	36695.9	50808.9	42762.1	51006.3	43590.6	44359.7	61393.6	51168.5	47835.7	56904.5	47919.5	52400.5	53975.1	6196.04	10260.5	7198.73	9984.84	7385.95	8004.89
M292T386_neg	Casimiroin	Alkaloids	Alkaloids derived from tryptophan and anthranilic acid	Quinoline alkaloids	-	-2.18134	-1.21477	-0.966565	2505.15	2613.41	1815.63	2241.71	2595.51	2184.59	1298.96	3361.39	1313.43	1755.96	1368.67	1463.78	10603.9	7020.89	6856.39	6871.8	9058.5	7495.86	5317.59	4679.74	3941.24	2767.2	3448.94	4360.59
M332T260_pos	Lunamarine	Alkaloids	Alkaloids derived from tryptophan and anthranilic acid	Quinoline alkaloids	-	4.55275	4.27593	0.276822	29989.6	29989.6	29989.6	29989.6	29989.6	29989.6	83915	118556	71039.5	70069.6	99121.1	100174	4099.51	4451.95	2791.04	4502.85	4990.76	2294.4	2525.71	2804.99	5573.19	4691.42	5330.37	7097.47
M317T181_neg	(S)-6-O-Methylnorlaudanosoline	Alkaloids	Alkaloids derived from tyrosine	Isoquinoline alkaloids	ko01110(Biosynthesis of secondary metabolites);ko00950(Isoquinoline alkaloid biosynthesis);	-0.10733	-2.25161	2.14428	10950	13458	11222.3	16888.1	7690.19	14568.7	8900.66	4252.8	7053.05	10627.2	9105.21	5715.23	9173.68	9394.92	8961.25	7350.7	7690.24	6609.34	40477	37567	27784.5	38871.2	36881.2	35829.7
M350T321_pos	Thebaine	Alkaloids	Alkaloids derived from tyrosine	Isoquinoline alkaloids	ko01110(Biosynthesis of secondary metabolites);ko01100(Metabolic pathways);ko00950(Isoquinoline alkaloid biosynthesis);	2.20668	-0.336521	2.5432	18468.4	13083.2	15251.5	17038.9	15417.4	15613.4	14783.4	26425	5307.08	1679.18	21744	24410.2	2605.79	5074.01	4134.32	2999.75	2274.37	3350.81	16546.8	17367.7	19690.3	20065.5	22784.2	22680.4
M522T45_neg	Deacetylipecoside	Alkaloids	Alkaloids derived from tyrosine	Isoquinoline alkaloids	ko00950(Isoquinoline alkaloid biosynthesis);	-1.92553	-3.81182	1.88629	6236.09	5747.37	7173.34	5567.32	6461.32	6274.33	3066.67	1634.03	2464.98	2061.37	1468.12	1564.32	7487.48	9618	10198.9	5692.89	7609.92	5963.63	27902.2	28882.8	29408.5	29675.3	28187.4	28108.2
M357T437_neg	Berberine	Alkaloids	Alkaloids derived from tyrosine	Isoquinoline alkaloids	ko00950(Isoquinoline alkaloid biosynthesis);ko01063(Biosynthesis of alkaloids derived from shikimate pathway);ko01110(Biosynthesis of secondary metabolites);ko04152(AMPK signaling pathway)	1.48969	-0.976529	2.46622	15443.7	11618.7	15980.7	14582.4	14356	14084.6	21847	16812.7	17120.8	18462.1	20725.2	33609.6	5321.27	6134.83	8598.66	8504.47	8202.69	9023.15	56150.2	44259.3	52318.9	41085	30461.7	28729.8
M366T370_pos	(S)-Corytuberine	Alkaloids	Alkaloids derived from tyrosine	Isoquinoline alkaloids	ko00950(Isoquinoline alkaloid biosynthesis);ko01110(Biosynthesis of secondary metabolites);	-1.99601	-6.84958	4.85358	205338	193700	205157	202214	198521	202770	4927.11	6591.28	4948.1	4500.78	6048.35	4724.09	11634	24361.8	16200.2	29553.1	23112.3	21746.5	617685	609535	679057	520599	687613	545950
M303T258_neg	Galanthamine	Alkaloids	Alkaloids derived from tyrosine	Isoquinoline alkaloids	ko00950(Isoquinoline alkaloid biosynthesis);ko01110(Biosynthesis of secondary metabolites);	-2.24753	-3.17198	0.924452	8746.19	4728.16	8504.83	6373.67	8284.25	6533.26	1662.9	1121.08	2034.06	1146.67	2238.97	1756.97	6355.51	9731.88	5963.51	8418.1	6230.43	10600.5	13571.5	14766.9	15378.3	16474	12088.8	17494.2
M366T462_pos	(S)-Scoulerine	Alkaloids	Alkaloids derived from tyrosine	Isoquinoline alkaloids	ko00950(Isoquinoline alkaloid biosynthesis);ko01110(Biosynthesis of secondary metabolites);ko01100(Metabolic pathways);	0.028859	-4.41523	4.44409	14214.3	12639.2	13352.1	13749	13385.1	13432.6	2608.04	3318.86	3298	2304.75	2697.76	2350.94	1377.9	3485.93	3379.98	2732.74	2414.99	2858.49	71859.4	68639	63818	48282.3	49563.2	51557.5
M366T446_pos	Salutaridine	Alkaloids	Alkaloids derived from tyrosine	Isoquinoline alkaloids	ko00950(Isoquinoline alkaloid biosynthesis);ko01100(Metabolic pathways);ko01110(Biosynthesis of secondary metabolites);	0.624875	-2.08323	2.70811	6887.29	6436.14	6875.88	6734.63	6730.53	6729.99	4189.27	3603.06	3178.1	4165.15	3646.72	4586.95	1633.19	2410.08	2142.63	2466.61	2728.7	3773.18	24279.3	17131.4	14374.2	11421	14076	17746.5
M364T309_pos	(S)-Cheilanthifoline	Alkaloids	Alkaloids derived from tyrosine	Isoquinoline alkaloids	ko00950(Isoquinoline alkaloid biosynthesis);ko01100(Metabolic pathways);ko01110(Biosynthesis of secondary metabolites);	-1.64659	-3.53292	1.88633	12650.9	9944.68	5451.85	9610.82	11243.6	8218.29	3455.31	1532.66	3196.33	4273.79	4264.31	3673.2	10543	6699.22	18969.9	14679	7347.34	5618.68	35267.8	35242.3	36455.9	39354	42044.3	47711.8
M391T447_neg	Macarpine	Alkaloids	Alkaloids derived from tyrosine	Isoquinoline alkaloids	ko01110(Biosynthesis of secondary metabolites);ko00950(Isoquinoline alkaloid biosynthesis);ko01100(Metabolic pathways);	-1.20136	-2.30647	1.10512	1963.91	2462.03	2101.74	2202.32	1992.44	2249.83	2038.03	2339.61	2352.07	2516.68	2206.56	2235.13	5596.1	3475.66	5750.46	3914.74	3909.85	8829.71	12819	8826.95	14900.6	9357.55	11936	9870.97
M177T255_neg	(-)-Caaverine	Alkaloids	Alkaloids derived from tyrosine	Isoquinoline alkaloids	-	-0.541586	-3.26613	2.72454	8565.59	9963.35	8921.84	8394.73	9324.15	9034.14	691.291	4377.55	868.249	4934.46	3400.14	4201.18	5438.18	4669.18	4175.76	3829.3	3914.36	4861.82	37816	15006.1	32463	30538.4	32218.9	29677.9
M326T370_pos	Mesembrenone	Alkaloids	Alkaloids derived from tyrosine	Isoquinoline alkaloids	-	-1.01867	-5.36494	4.34626	4946.45	5138.89	5337.86	4386.8	5219.18	5098.41	344.936	276.133	292.315	333.836	526.626	422.155	508.842	620.414	386.317	971.933	854.277	1107.42	13151.5	12229.6	16883.7	18011.8	14695.4	15526
M377T41_neg	(+)-Cassythicine	Alkaloids	Alkaloids derived from tyrosine	Isoquinoline alkaloids	-	-0.813482	-3.14368	2.3302	5063.83	5215.57	4535.69	5100.67	4808.89	5025.32	827.855	2173.11	1067.28	1648.74	5099.48	1830.03	4788.06	2284.66	4799.3	2779.67	3734.89	3838.97	19729.7	18689.7	20704.4	17164.2	19814.3	15664.6
M368T371_pos	Bicuculline	Alkaloids	Alkaloids derived from tyrosine	Isoquinoline alkaloids	ko07230(GABA-A receptor agonists/antagonists);	-0.701623	-4.50047	3.79884	7211.33	6626.15	7605.83	7047.19	7105.76	7129.05	624.18	589.332	1008.19	1217.36	819.778	1267.27	513.209	1306.65	1678.96	2059.46	1608.53	1820.48	18566.9	21289.5	22991.9	23664.6	21844.3	16724.8
M342T309_pos	Aristolochic_acid	Alkaloids	Alkaloids derived from tyrosine	Isoquinoline alkaloids	-	3.2744	3.86081	-0.586412	7619.16	12104.1	10825.2	9812.32	9786.76	9868.05	27818.6	30148.6	29862.8	21694.8	27035.6	20516.8	1592.61	2734.08	5133.65	1086.66	4196.45	1490.41	2095.27	2106.94	1903.46	1600.53	1612.11	1493.39
M258T392_pos	Lophophorine	Alkaloids	Alkaloids derived from tyrosine	Isoquinoline alkaloids	-	-4.22439	-9.35598	5.13158	294170	289725	305342	294341	296644	295491	2765.99	1730.3	1324.07	1521.23	1220.89	1018.59	19340.9	27926.9	34043.5	28188.9	33239.5	36355.2	1.13932e+06	913998	1.10433e+06	1.00112e+06	1.03019e+06	1.08935e+06
M383T196_neg	Nitidine	Alkaloids	Alkaloids derived from tyrosine	Isoquinoline alkaloids	-	-3.15639	0.507252	-3.66364	16994.4	17249.1	15920.6	16806.5	16786.5	16744.5	8455.92	9586.98	9074.76	10213.3	9086.06	8414.49	93504.9	86803	88129.5	65786.5	72266.3	82385.4	6488.07	5976.41	7849.28	6709.15	5383.44	6171
M380T446_pos	Cassythine	Alkaloids	Alkaloids derived from tyrosine	Isoquinoline alkaloids	-	0.630124	2.40515	-1.77503	990.242	990.242	990.242	990.242	990.242	990.242	2257.74	1508.41	1693.59	2383.59	2825.2	2888.9	207.179	939.992	1506.05	2032.42	1815.09	2259.02	314.957	240.985	448.216	728.215	231.854	595.269
M412T430_pos	Aknadicine	Alkaloids	Alkaloids derived from tyrosine	Isoquinoline alkaloids	-	-0.753054	-3.05037	2.29731	919.031	783.413	1186.2	923.146	1401.34	762.631	398.423	548.305	547.691	637.802	577.604	758.611	432.297	811.511	1037.77	1246.32	1197.93	1119.73	5232.44	4857.92	4741.93	3546.22	5711.74	4643.08
M671T241_neg	Calafatimine	Alkaloids	Alkaloids derived from tyrosine	Isoquinoline alkaloids	-	1.66582	3.40845	-1.74262	2404.19	2404.19	2404.19	2404.19	2404.19	2404.19	3303.27	3824.19	3051.75	3859.69	3912.18	3179.95	866.132	753.433	1522.2	1183.63	1472.96	861.387	220.224	241.498	275.582	420.803	461.505	370.492
M673T239_neg	Thalsimine	Alkaloids	Alkaloids derived from tyrosine	Isoquinoline alkaloids	-	-2.39352	0.306833	-2.70036	1503.17	1433.88	1121.01	1321.9	800.659	1789.45	1190.54	1284.4	1286	1055.84	1258.56	1495.69	6425.45	5780.06	7715.81	6486.37	6616.22	6757.29	936.719	976.349	868.091	1215.84	1095.49	1028.05
M120T274_pos	Tyramine	Alkaloids	Alkaloids derived from tyrosine	Thiazole alkaloids	ko00950(Isoquinoline alkaloid biosynthesis);ko01110(Biosynthesis of secondary metabolites);ko00350(Tyrosine metabolism);ko01060(Biosynthesis of plant secondary metabolites);	0.238797	-4.40756	4.64636	32382.1	30892	31723.2	27956.8	32511.5	31407	3828.76	6351.16	4160.73	7079.64	6104.79	6323.72	2087.43	5131.1	4821.5	4658.49	6832.65	5154.03	120249	113735	124701	109843	118247	131598
M136T318_pos	Dopamine	Alkaloids	Alkaloids derived from tyrosine	Thiazole alkaloids	ko00350(Tyrosine metabolism);ko00950(Isoquinoline alkaloid biosynthesis);ko00965(Betalain biosynthesis);ko01060(Biosynthesis of plant secondary metabolites);ko01063(Biosynthesis of alkaloids derived from shikimate pathway);ko01100(Metabolic pathways);ko01110(Biosynthesis of secondary metabolites);ko04024(cAMP signaling pathway);ko04080(Neuroactive ligand-receptor interaction);ko04540(Gap junction…	0.959169	-1.114	2.07317	8663.33	6589.05	9247.88	8450.45	7535.03	8329.78	6534.94	10523.2	5032.69	8502.87	5662	7428.39	1160.35	3331.76	5311.69	4095.46	4286.45	4283.33	21201.1	13892.6	22282.1	14239.7	11446.8	11489.5
M219T42_pos	Candicine	Alkaloids	Alkaloids derived from tyrosine	Thiazole alkaloids	-	2.00984	1.92908	0.080756	19133.9	19133.9	19133.9	19133.9	19133.9	19133.9	36885.5	33901.2	47375.9	50281	44101.4	47910.2	7628.96	12858.6	10633.4	15316.8	11020	7213.5	9827.57	8306.74	17562.1	11934.2	10823.6	9940.44
M281T392_pos	Methyl nigakinone	Alkaloids	Indolonaphthyridine alkaloids	Indolonaphthyridine alkaloids	-	-1.66328	-5.37573	3.71245	7916.64	7916.64	7916.64	7916.64	7916.64	7916.64	950.023	564.952	480.132	316.256	372.583	402.128	1137.11	1730.34	1754.38	1368.59	2137.46	1646.85	29327.9	21661.4	21576	18533.2	18660.3	18374.5
M286T427_pos	Hydromorphone	Alkaloids	Others	Morphinans	-	-2.02521	-3.08124	1.05603	5956.87	5956.87	5956.87	5956.87	5956.87	5956.87	2050.92	2024.05	2009.38	2322.62	2685.16	2534.91	1619.84	7048.36	9795.31	10741.1	13680.2	12584.1	25954.8	17131.6	18414.5	17466.1	18506.5	17857.7
M345T392_neg	Calycanthine	Alkaloids	Others	Others	-	-3.2928	-3.98928	0.696486	4941.75	4941.75	4941.75	4941.75	4941.75	4941.75	1226.15	1703.57	922.688	545.47	781.286	749.946	8268.09	10835.9	10113.8	10773.6	10352.2	7762.29	20666.9	18191.1	18203.1	9213.94	16550.9	11337.5
M183T262_pos	1-Methyluric_acid	Alkaloids	Others	Purine alkaloids	ko00232(Caffeine metabolism);	-1.96819	2.50934	-4.47753	28318.5	27406.4	29416.9	28347.5	28328.1	28316.1	20349.1	14642.6	8767.18	11005.7	8118.43	14463.5	50982.2	75426.6	40076.2	41273.7	39344.6	55536	3153.47	1960.21	1810.4	1734.31	2088.16	2838.23
M231T161_neg	Caffeine	Alkaloids	Others	Purine alkaloids	ko01060(Biosynthesis of plant secondary metabolites);ko01100(Metabolic pathways);ko01110(Biosynthesis of secondary metabolites);ko00232(Caffeine metabolism);	0.912372	2.22367	-1.3113	41542.7	17513.4	32447.4	32940	30338.3	28212.3	40078	35012.2	29638.6	28900.6	35432.7	29377.3	31616.7	29537.1	20098.8	5536.56	12886.5	5757.5	3491.04	2127.05	13845.6	8700.79	13452.8	867.659
M300T43_neg	Xanthosine	Alkaloids	Others	Purine alkaloids	ko00232(Caffeine metabolism);ko01110(Biosynthesis of secondary metabolites);ko00230(Purine metabolism);ko01100(Metabolic pathways);	-0.957834	-2.02	1.06217	13514.6	13297.7	11399.3	13112.2	11655.8	13419	10083.9	10750.1	12701.8	7197.37	8967.21	9183.86	24292.3	19799.8	20116.3	17043	17484.4	15640.4	45366.1	37022.2	49014.8	43205	32720.3	31496.8
M554T44_pos	Ambenonium	Amino acids and derivatives	Alpha amino acid amides	Others	-	-1.24362	1.49722	-2.74085	912.725	726.679	909.587	835.817	911.642	812.921	780.735	751.493	965.494	858.496	667.831	942.897	2571.92	2367.5	1089.03	2225.7	1796.42	1710.79	206.288	351.679	307.445	216.236	349.064	328.752
M148T211_pos	Thiomorpholine	Amino acids and derivatives	Alpha amino acids	Others	-	0.70833	-4.34456	5.05289	6796.98	6796.98	6796.98	6796.98	6796.98	6796.98	2032.91	1665.79	1481.78	1677.77	1202.24	1443.94	1057.92	879.573	995.054	766.9	1125.65	991.883	40964	21825.6	42536.6	22674.2	31079.3	34014.4
M394T219_pos	S-Adenosylmethioninamine	Amino acids and derivatives	Amines	Biogenic amines	ko00270(Cysteine and methionine metabolism);ko00330(Arginine and proline metabolism);ko01100(Metabolic pathways);	-0.172031	2.23157	-2.4036	2608.8	2608.8	2608.8	2608.8	2608.8	2608.8	6211.18	6084.69	3431.8	2748.3	3209.88	2784.69	7686.95	7049.82	1864.92	3134.54	4309.52	3523.81	1585.21	1178.83	672.176	431.596	671.57	671.045
M164T275_neg	L-Phenylalanine	Amino acids and derivatives	Amino acids	Common amino acids	ko00970(Aminoacyl-tRNA biosynthesis);ko01210(2-Oxocarboxylic acid metabolism);ko01100(Metabolic pathways);ko02010(ABC transporters);ko00966(Glucosinolate biosynthesis);ko00360(Phenylalanine metabolism);ko01230(Biosynthesis of amino acids);ko01070(Biosynthesis of plant hormones);ko00940(Phenylpropanoid biosynthesis);ko00960(Tropane, piperidine and pyridine alkaloid biosynthesis);ko01060(Biosynthes…	-1.49602	-5.5028	4.00678	73682.7	73682.7	73682.7	73682.7	73682.7	73682.7	10178.8	8423.26	6274.12	6619.25	10006	16344.4	33762.8	34148.5	23959.9	36231.9	14574.7	20483.9	352159	408855	518955	468142	428312	446465
M116T311_neg	L-Valine	Amino acids and derivatives	Amino acids	Common amino acids	ko00970(Aminoacyl-tRNA biosynthesis);ko01210(2-Oxocarboxylic acid metabolism);ko00770(Pantothenate and CoA biosynthesis);ko01100(Metabolic pathways);ko02010(ABC transporters);ko00966(Glucosinolate biosynthesis);ko01230(Biosynthesis of amino acids);ko01060(Biosynthesis of plant secondary metabolites);ko01110(Biosynthesis of secondary metabolites);ko00460(Cyanoamino acid metabolism);ko00280(Valine,…	-0.850563	-3.84255	2.99199	12370.1	14805	15293.6	14910.8	11107	15683.2	3779.41	6737.82	5515.15	6171.67	6515.97	6786.67	10806.2	7799.14	9625.73	12342.6	11539.6	11912.5	83736.8	63373.5	83171	91378.5	88115	99595.9
M150T302_pos	L-Methionine	Amino acids and derivatives	Amino acids	Common amino acids	ko00970(Aminoacyl-tRNA biosynthesis);ko00270(Cysteine and methionine metabolism);ko01100(Metabolic pathways);ko01210(2-Oxocarboxylic acid metabolism);ko00966(Glucosinolate biosynthesis);ko01230(Biosynthesis of amino acids);ko01070(Biosynthesis of plant hormones);ko01060(Biosynthesis of plant secondary metabolites);ko01110(Biosynthesis of secondary metabolites);	-1.51606	-4.10183	2.58576	6723.03	6511.96	7163.33	6686	6778.61	6776.15	1206.79	1009.42	817.428	1251.79	1066.06	966.464	1604.63	2589.02	3840.16	4090.15	3288.09	2657.89	15005.7	16631	19575.4	20867.5	20235.6	16164.7
M132T281_pos	L-Leucine	Amino acids and derivatives	Amino acids	Common amino acids	ko01060(Biosynthesis of plant secondary metabolites);ko01110(Biosynthesis of secondary metabolites);ko00280(Valine, leucine and isoleucine degradation);ko00290(Valine, leucine and isoleucine biosynthesis);ko00970(Aminoacyl-tRNA biosynthesis);ko02010(ABC transporters);ko00966(Glucosinolate biosynthesis);ko01100(Metabolic pathways);ko01210(2-Oxocarboxylic acid metabolism);ko01230(Biosynthesis of am…	-0.574076	-3.85784	3.28376	17305.9	17670.3	18249.5	16749.6	18135.7	17505.7	3586.45	12645	3263.47	5440.53	2432.5	5642.01	4934.86	7888.87	8107.43	10303.3	8441.34	9466.87	81031.5	67975.1	88407.1	71364.3	80058.9	89760.1
M191T306_pos	L-Glutamine	Amino acids and derivatives	Amino acids	Common amino acids	ko01060(Biosynthesis of plant secondary metabolites);ko00240(Pyrimidine metabolism);ko00220(Arginine biosynthesis);ko00630(Glyoxylate and dicarboxylate metabolism);ko00970(Aminoacyl-tRNA biosynthesis);ko00910(Nitrogen metabolism);ko00230(Purine metabolism);ko00250(Alanine, aspartate and glutamate metabolism);ko01100(Metabolic pathways);ko02010(ABC transporters);ko01230(Biosynthesis of amino acids…	-2.58764	4.27589	-6.86353	144963	144963	144963	144963	144963	144963	96209.1	75209.2	72568.8	54811.1	79282.6	60499.4	423140	365540	294866	517782	468095	566942	3509.34	5031.44	3756.74	4120.07	2699.7	3522.72
M104T387_neg	L-Serine	Amino acids and derivatives	Amino acids	Common amino acids	ko01110(Biosynthesis of secondary metabolites);ko00630(Glyoxylate and dicarboxylate metabolism);ko00460(Cyanoamino acid metabolism);ko01060(Biosynthesis of plant secondary metabolites);ko02010(ABC transporters);ko01100(Metabolic pathways);ko00261(Monobactam biosynthesis);ko00600(Sphingolipid metabolism);ko01230(Biosynthesis of amino acids);ko01200(Carbon metabolism);ko01502(Vancomycin resistance)…	-1.63108	-2.26577	0.634689	24962.8	24446.1	25747.6	17557.5	27304	24196.6	13189.9	16006.8	17626	20821.8	18081.4	10584.3	43420.5	53976	55193.1	57139.4	57030.3	31556.3	66819.5	69132.3	95318.7	88307.4	70818.9	72768.6
M146T400_neg	L-Glutamate	Amino acids and derivatives	Amino acids	Common amino acids	ko01110(Biosynthesis of secondary metabolites);ko00910(Nitrogen metabolism);ko01210(2-Oxocarboxylic acid metabolism);ko00480(Glutathione metabolism);ko00330(Arginine and proline metabolism);ko00650(Butanoate metabolism);ko01060(Biosynthesis of plant secondary metabolites);ko00332(Carbapenem biosynthesis);ko00220(Arginine biosynthesis);ko00430(Taurine and hypotaurine metabolism);ko00630(Glyoxylate…	-1.61498	-2.04848	0.433501	643014	681160	664870	693154	647291	668436	339244	437552	374106	405010	378379	407817	1.05875e+06	1.14695e+06	1.23725e+06	1.14272e+06	1.29118e+06	1.29723e+06	1.66655e+06	1.44332e+06	1.7457e+06	1.51024e+06	1.65668e+06	1.66614e+06
M118T367_neg	L-Threonine	Amino acids and derivatives	Amino acids	Common amino acids	ko01110(Biosynthesis of secondary metabolites);ko00290(Valine, leucine and isoleucine biosynthesis);ko01060(Biosynthesis of plant secondary metabolites);ko00261(Monobactam biosynthesis);ko01100(Metabolic pathways);ko02010(ABC transporters);ko00860(Porphyrin metabolism);ko01230(Biosynthesis of amino acids);ko00970(Aminoacyl-tRNA biosynthesis);ko00260(Glycine, serine and threonine metabolism);	-1.50448	-2.36353	0.859054	13763.1	13763.1	13763.1	13763.1	13763.1	13763.1	5302.63	11512.1	7220.49	8061.92	6797.5	5923.37	21412.4	27214.9	21781	18624.2	15081.5	23044.6	52578.5	38381.3	49170.2	26307.1	30090.6	34118.7
M203T272_neg	L-Tryptophan	Amino acids and derivatives	Amino acids	Common amino acids	ko00260(Glycine, serine and threonine metabolism);ko00380(Tryptophan metabolism);ko00400(Phenylalanine, tyrosine and tryptophan biosynthesis);ko00404(Staurosporine biosynthesis);ko00901(Indole alkaloid biosynthesis);ko00966(Glucosinolate biosynthesis);ko00970(Aminoacyl-tRNA biosynthesis);ko00996(Biosynthesis of various alkaloids);ko00997(Biosynthesis of various other secondary metabolites);ko0099…	1.38392	-1.93212	3.31603	30681	30681	30681	30681	30681	30681	14828	26094.9	19752.8	26579.7	22422.4	22170.6	6671.81	8542.54	9585.47	10917.2	5849.5	8954.68	78302.9	69125.6	101955	77198.9	83382	93188.6
M132T446_neg	D-Aspartate	Amino acids and derivatives	Amino acids	Other amino acids	ko00250(Alanine, aspartate and glutamate metabolism);	-1.17056	-2.55363	1.38307	31822.7	31822.7	31822.7	31822.7	31822.7	31822.7	14878.8	23813.7	19025.9	3786.87	22665.4	19144.5	14856.1	37383.4	50420.1	2250.62	52302.4	75348.8	59010.1	86954.1	63900.8	96957.4	121564	178185
M291T469_pos	Argininosuccinic acid	Amino acids and derivatives	Amino acids	Other amino acids	ko00250(Alanine, aspartate and glutamate metabolism);ko01110(Biosynthesis of secondary metabolites);ko01100(Metabolic pathways);ko00220(Arginine biosynthesis);ko01230(Biosynthesis of amino acids);	-1.08393	-3.01819	1.93426	10585.2	10642.3	10431.1	10587.1	10558.6	10558.9	7186.43	5513.15	5462.51	8442.2	4761.07	4084.22	8271.45	10931.1	16565.3	9673.66	14742.5	14962.2	46736.4	53345.5	39748.8	46937.3	49770.1	50657.6
M116T322_pos	D-Proline	Amino acids and derivatives	Amino acids	Other amino acids	ko00330(Arginine and proline metabolism);ko01100(Metabolic pathways);	-0.380479	-2.47443	2.09395	25226.3	25691.5	23527	25643.3	24764.7	24904.9	12651.9	16541.6	10885.7	14242.9	11862.7	15144.5	10996.8	19903.5	17528.5	21223.1	18974.8	17245.7	108090	68794	73803.5	54975.2	82447.6	63873.9
M577T451_pos	Pantethine	Amino acids and derivatives	Beta amino acids and derivatives	Others	-	-1.42517	-2.9699	1.54473	1625.34	1625.34	1625.34	1625.34	1625.34	1625.34	500.928	577.756	568.243	1022.85	1240.79	745.713	889.07	1203.14	2500.76	2322.84	3224.83	2363.6	5074.91	5556.88	6472.8	6588.2	6640.56	6147.81
M727T176_pos	Amaranthin	Amino acids and derivatives	Betalains	Betacyanins	ko00965(Betalain biosynthesis);	4.08135	3.67035	0.410995	9336.91	5465.85	5748.85	6852.47	7084.46	6639.76	22475.2	27101.2	18804.7	21315.8	5404.92	14490	1294.66	1027.89	1542.69	978.889	711.468	918.377	1870.96	1693.3	1500.81	1692.8	704.28	1145.66
M629T499_neg	Prebetanin	Amino acids and derivatives	Betalains	Betacyanins	ko00999(Biosynthesis of various plant secondary metabolites);ko01100(Metabolic pathways);ko01110(Biosynthesis of secondary metabolites);	2.14542	-0.956063	3.10148	5246.63	4385.01	5121.16	3332.64	5536.8	4672.76	6050.4	8100.08	7317.31	4208.02	5941.44	5229.92	1634.29	1292.69	1728.05	1492.6	1291.91	888.976	10724.4	11430.6	12699.1	10956.3	15360.2	10313.2
M385T369_pos	Miraxanthin-V	Amino acids and derivatives	Betalains	Betaxanthins	ko01110(Biosynthesis of secondary metabolites);ko00965(Betalain biosynthesis);	-0.453862	-2.92781	2.47395	8143.12	8143.12	8143.12	8143.12	8143.12	8143.12	2460.15	2405.64	2807.98	2116.01	1580.26	4153.24	930.806	3883.36	4147.57	4651.46	4585.25	3063.82	15679.6	20479.1	25043.8	21141.4	17095	18686.2
M284T40_neg	Portulacaxanthin_III	Amino acids and derivatives	Betalains	Betaxanthins	-	0.0917417	2.23052	-2.13878	12463.2	15740.7	12594.8	12659	13962.4	13316	20286.8	26955.8	19546.8	27643.5	23315.9	24654.2	24211.5	19484.4	25642.9	21414.7	22732	20143.8	5240.67	5046.41	4273.81	5721.46	5018.05	5043.1
M347T499_pos	Portulacaxanthin_I	Amino acids and derivatives	Betalains	Betaxanthins	-	0.569738	-2.34045	2.91018	4624.32	4662.36	4638.65	4641.12	4639.69	4641.85	1099.61	1257.36	1060.69	1695.26	1917.1	2347	559.469	642.74	953.961	1132.2	1180.41	1848.89	8146.33	7567.92	5673.14	7645.34	8807.56	9650.56
M229T399_pos	Betalamic_acid	Amino acids and derivatives	Betalains	Others	ko01110(Biosynthesis of secondary metabolites);ko00965(Betalain biosynthesis);	-0.717698	1.39364	-2.11134	2822.17	2873.74	2769.27	2834.06	2823.97	2823.33	6194.85	4599.52	2862.9	2111.94	2735.23	2381.13	7343.17	6542.44	4248.09	4040.43	7322.79	4850.57	2092.35	506.34	1616.64	1179.43	981.703	1572.65
M436T364_pos	Muscapurpurin	Amino acids and derivatives	Betalains	Others	-	-3.42366	0.151288	-3.57494	945.28	1056.35	742.974	940.312	815.079	970.515	355.566	336.807	278.046	339.905	317.31	244.442	920.949	3228.77	4410.2	3532.77	4158.25	3837.51	241.054	311.08	273.879	354.939	284.163	220.588
M191T507_pos	3-Mercapto-2-mercaptomethylpropanoate	Amino acids and derivatives	Others	Others	-	-1.3297	2.13138	-3.46109	475.25	970.975	624.774	742.954	587.761	685.88	376.876	635.073	422.166	585.711	419.419	476.07	1354.59	636.237	1138.22	1609.01	1007.86	1581.75	55.5419	168.904	23.9225	186.971	130.142	99.9062
M260T392_pos	Proacacipetalin	Amino acids and derivatives	Cyanogenic glucosides	Cyanogenic glucosides derived from leucine	-	-1.44123	-6.1436	4.70237	6155.87	5734.62	6093.44	6018.07	5752.36	6122.8	347.062	240.363	371.354	260.566	393.078	163.888	827.688	967.616	845.888	827.506	709.252	645.666	23552.4	21089.5	22712.1	18746.5	21326.8	18154.3
M409T130_pos	Proacaciberin	Amino acids and derivatives	Cyanogenic glucosides	Cyanogenic glucosides derived from leucine	-	-1.52708	2.13599	-3.66307	963020	768311	532949	998341	845752	702003	903186	677944	323227	624399	690431	70213.8	1.59457e+06	1.99254e+06	1.76183e+06	1.54894e+06	1.34101e+06	1.24121e+06	89215.2	273775	90427.3	154514	61070.8	79374.1
M303T163_neg	Volkenin	Amino acids and derivatives	Cyanogenic glucosides	Cyanogenic glucosides derived from nonprotein amino acid	-	2.07371	1.19952	0.874189	16148.3	27531.6	19921.6	21257	20336.1	20556.2	261557	264369	253591	296328	363217	288331	65611.7	69581.4	44843.9	64471.9	81005.7	84823.7	119146	123850	125805	130844	134244	118251
M304T316_pos	Gynocardin	Amino acids and derivatives	Cyanogenic glucosides	Cyanogenic glucosides derived from nonprotein amino acid	-	0.368728	2.39121	-2.02248	6020.83	7561.87	6103.15	7334.74	6421.2	6547.49	19217.9	11087.3	15796.2	11419	14086.7	10668.6	5228.22	7481.01	10619	10227	15560.9	14603.5	2828.65	895.751	2742.31	3801.96	2634.31	2780.64
M378T223_pos	Acalyphin	Amino acids and derivatives	Cyanogenic glucosides	Cyanogenic glucosides derived from other origin	-	-2.42193	-1.25241	-1.16952	3033.91	1275.48	2411.1	2138.25	1992.33	2199.51	2036.98	954.379	991.606	1682.69	1154.92	1303.25	4876.38	7187.12	8386.09	5794.62	8745.78	8544.62	3013.39	3770.91	2910.75	3169.19	3442.53	3047.36
M426T198_neg	Vicianin	Amino acids and derivatives	Cyanogenic glucosides	Cyanogenic glucosides derived from phenylalanine	-	1.16603	-2.09682	3.26285	2863.58	2469.2	3139.09	3186.88	2710.51	2832.99	3685.07	3071.44	4510.34	3839.88	3394.92	5074.2	1951.2	2456.32	1061.29	1934.92	1352.14	1750.6	16559.3	14861.7	16950.5	15266.5	19558.1	17653.3
M464T198_neg	Lucumin	Amino acids and derivatives	Cyanogenic glucosides	Cyanogenic glucosides derived from phenylalanine	-	2.16434	-0.876198	3.04054	5363.12	4600.33	5600.58	5187.97	5349.75	5063.45	5726.69	6064.56	6369.65	6794.71	5557.44	6121.26	614.003	2868.06	541.335	2551.41	1416.26	181.472	12150.5	9710.12	11022.3	11399.2	10503.3	12458
M310T194_neg	Dhurrin	Amino acids and derivatives	Cyanogenic glucosides	Cyanogenic glucosides derived from thyrosine	ko01110(Biosynthesis of secondary metabolites);ko00460(Cyanoamino acid metabolism);	-1.16587	-2.28087	1.115	7166.96	6351.84	5612.56	7821.41	5828.41	6694.98	4436.31	3967.67	4556.82	3661.39	5181.57	3464.86	11104.6	8218.33	11890.4	7870.18	7770.01	9841.2	17377.8	21801.1	19247.4	14542.6	26197.4	23631.9
M496T227_pos	Proteacin	Amino acids and derivatives	Cyanogenic glucosides	Cyanogenic glucosides derived from thyrosine	-	5.1183	3.57521	1.54309	4146.86	3551.44	4004.07	3053.32	4046.32	3856.36	7839.5	8887.72	8137.3	9885.91	9685.22	9972.37	156.495	260.183	234.446	267.353	274.14	373.777	407.843	907.85	337.114	1058.96	842.485	1010.49
M446T225_pos	Neolinustatin	Amino acids and derivatives	Cyanogenic glucosides	Cyanogenic glucosides derived from valine or isoleucine	-	-0.852901	1.62449	-2.47739	2868.6	2868.6	2868.6	2868.6	2868.6	2868.6	5077.28	4262.31	4505.81	4787.11	2398.71	6123.63	5600.03	8826.63	10813	8837.78	11412.2	3555.59	1392.05	1660.74	1113.33	1579.65	1474.84	1586.34
M427T142_pos	Linustatin	Amino acids and derivatives	Cyanogenic glucosides	Cyanogenic glucosides derived from valine or isoleucine	-	-0.16731	2.52933	-2.69663	25337.5	25337.5	25337.5	25337.5	25337.5	25337.5	30196.2	19105.8	29881.6	34997.7	46119.7	37898	24706.6	34314.1	24268.4	41608.3	55573.9	42098.7	4870.95	4591.52	4804.96	7004.5	7061.47	5998.58
M377T369_neg	Carbenicillin	Amino acids and derivatives	Dipeptides	Dipeptides	-	-1.17837	-5.95154	4.77317	42622.5	42622.5	42622.5	42622.5	42622.5	42622.5	2348.9	2579.69	2386.41	2689.42	2469.46	2454.22	8467.82	6440.73	4616.09	5868	4715.13	3677.63	147277	147103	168326	148375	135934	176825
M547T188_pos	Argatroban	Amino acids and derivatives	Dipeptides	Dipeptides	-	-2.66329	-0.706024	-1.95727	19837.9	10380.4	24295.7	15727.1	16948.1	16994.7	20654.6	15748	3931.08	11589.1	11056.6	9232.04	108306	108808	93608.6	57088.8	48502.6	41127.7	26748.6	15557.3	28908.3	13287	16119.3	17178
M364T218_neg	Enalaprilate	Amino acids and derivatives	Dipeptides	Dipeptides	-	-4.25105	-1.49199	-2.75906	2781.44	3979.21	1923.15	3649	1981.67	3349.4	494.446	371.529	266.376	698.286	754.937	553.437	11767.6	7357.52	8614.21	11849.2	7807.83	12374	1213.17	1963	1245.41	1387.58	1539.12	1480.99
M275T458_neg	Glutamyl-glutamic	Amino acids and derivatives	Dipeptides	Dipeptides	-	-1.1072	-3.53453	2.42733	3147.45	3147.45	3147.45	3147.45	3147.45	3147.45	1142.23	1392.03	1162.58	2051.52	1723.72	1444.51	2053.61	3010.82	4179.56	3901.8	3464.37	2598.52	13860.5	15717.6	17634.3	21780.3	17145.1	17185.2
M423T472_pos	Ticarcillin	Amino acids and derivatives	Dipeptides	Dipeptides	-	-2.80209	2.06915	-4.87124	32013.4	38503.5	27126	31995.6	32792.9	32296.1	18771.1	27383.8	31841.6	32224.2	22524.1	21302.5	112289	146893	220322	213213	184857	196830	4807.5	6027.87	5621.19	9535.3	5425.97	5291.57
M374T29_neg	Glucocochlearin	Amino acids and derivatives	Glucosinolates	Glucosinolates derived from isoleucine	ko00966(Glucosinolate biosynthesis);ko01210(2-Oxocarboxylic acid metabolism);ko01110(Biosynthesis of secondary metabolites);	2.30368	0.956885	1.34679	3167.09	3167.09	3167.09	3167.09	3167.09	3167.09	5155.1	6746.92	7170.76	6625.79	3311.8	3554.65	907.694	1403.76	794.547	1930.57	808.597	750.742	959.922	5669.38	1951.08	2281.42	3244.93	2669.72
M428T178_pos	Glucocleomin	Amino acids and derivatives	Glucosinolates	Glucosinolates derived from isoleucine	-	3.47151	2.49978	0.971729	10764.7	10764.7	10764.7	10764.7	10764.7	10764.7	8303.71	16105.2	14761	10704.8	21043.7	16894.1	1455.8	1195.96	1166.25	1655.85	1362.64	1079.89	2315.94	2138.11	1724.76	3549.86	3374.36	2422.53
M465T453_neg	Glucolesquerellin	Amino acids and derivatives	Glucosinolates	Glucosinolates derived from methionine	ko00966(Glucosinolate biosynthesis);ko01210(2-Oxocarboxylic acid metabolism);ko01110(Biosynthesis of secondary metabolites);	2.41138	-0.130372	2.54175	29090	19962.8	37992.9	23396	27802.1	27834.2	38825.6	87662.5	51434.1	50418.3	48781.1	49513.7	9060	10811.5	8333.21	8945.2	8926.8	15322.8	76110	79335.8	45799	50933.4	52539.1	52809.9
M479T188_neg	7-Methylthioheptyl_glucosinolate	Amino acids and derivatives	Glucosinolates	Glucosinolates derived from methionine	ko01210(2-Oxocarboxylic acid metabolism);ko01110(Biosynthesis of secondary metabolites);ko00966(Glucosinolate biosynthesis);	7.88897	3.73834	4.15063	744537	701850	743892	729930	729847	729841	1.18527e+06	1.26465e+06	1.1487e+06	1.27161e+06	1.13759e+06	1.10059e+06	5061.9	5379.34	4861.86	4597.96	5169.83	4917.75	15392.4	117064	19175.4	209441	87098.3	84453.1
M402T34_neg	Gluconapoleiferin	Amino acids and derivatives	Glucosinolates	Glucosinolates derived from methionine	-	1.49237	2.40982	-0.917448	4433.77	4716.88	3449.26	4418.29	4239.52	4187.07	7038.66	9728.06	6422.38	7376.36	7887.57	7565.91	2464.87	2203.47	2685.09	1673.86	1730.72	5598.41	1646.8	1748.7	978.599	1109.11	1780.45	1396.16
M434T427_neg	Glucoraphenin	Amino acids and derivatives	Glucosinolates	Glucosinolates derived from methionine	-	-2.83406	-1.5111	-1.32296	2047.13	1972.99	2083.78	1711.69	2092.94	2013.82	975.655	1218	985.074	796.004	897.471	989.043	6296.99	7023.85	5983.6	7873.58	7543.47	7073.84	3876.48	3113.89	2608.93	2161.46	2865.43	2080.02
M382T261_pos	Sinigrin;2-Propenyl glucosinolate;Allylglucosinolate	Amino acids and derivatives	Glucosinolates	Glucosinolates derived from methionine	-	1.79117	4.00502	-2.21385	10029.9	10919.9	11983.4	10726.1	10619.6	10995.2	15230.2	15617.3	14890.3	14700.5	8561.35	12870.8	3589.44	5298.51	1670.79	5612.42	3506.53	3977.78	838.657	978.213	911.453	776.659	527.73	1066.43
M412T308_pos	Progoitrin	Amino acids and derivatives	Glucosinolates	Glucosinolates derived from methionine	-	2.20596	4.72562	-2.51966	5172.44	7122.44	5267.9	5771.26	5781.76	5787.1	5732.8	5263.65	10876.5	7575.58	16619	10663.8	948.276	1521.45	1407.23	4605.8	3217.03	596.177	122.171	188.734	299.135	642.514	599.694	291.966
M509T202_neg	Glucohirsutin;8-Methylsulfinyloctyl glucosinolate	Amino acids and derivatives	Glucosinolates	Glucosinolates derived from methionine	-	6.25724	4.34333	1.91391	440141	367292	461554	333923	430892	417928	711682	710836	703024	793107	728009	730995	10742.4	9945.53	10203.7	8508.39	9037.19	8792.87	11099.2	64492.4	11618.2	65714.3	31366.7	31368.6
M439T368_neg	Gluconasturtiin	Amino acids and derivatives	Glucosinolates	Glucosinolates derived from phenylalanine	ko01110(Biosynthesis of secondary metabolites);ko01210(2-Oxocarboxylic acid metabolism);ko00966(Glucosinolate biosynthesis);	-1.14243	-2.18413	1.04169	35838.7	35838.7	35838.7	35838.7	35838.7	35838.7	20800.2	19092.3	24686.7	21668.4	21471.7	16672.6	45978.1	48988.6	50756.5	56119.1	43695.5	29061.5	108395	85937.8	96843.8	91955	108030	74138.9
M447T46_1_neg	Glucobrassicin	Amino acids and derivatives	Glucosinolates	Glucosinolates derived from tryptophan	ko01210(2-Oxocarboxylic acid metabolism);ko01110(Biosynthesis of secondary metabolites);ko00966(Glucosinolate biosynthesis);ko00380(Tryptophan metabolism);	-1.8758	-2.50431	0.628512	9268.23	10168.5	13101.1	9525.27	9607.59	11135.6	12617.5	15069.6	9641.73	12661.9	28491.9	17860.6	35196.8	71196.6	40827.4	65004.8	84064.8	57293.7	85333.1	72327.2	92577.9	75989.3	135582	84820.7
M379T446_pos	Glucoputranjivin	Amino acids and derivatives	Glucosinolates	Glucosinolates derived from valine	ko01110(Biosynthesis of secondary metabolites);ko01210(2-Oxocarboxylic acid metabolism);ko00966(Glucosinolate biosynthesis);	0.923071	3.00612	-2.08305	5244.94	6749.03	4981.32	5810.96	5988.91	5432.6	15695.7	12501.2	12116	11338.7	11525.1	12108.9	3479.96	7601.78	7208	7281.16	6906.64	7226.96	1326.8	925.182	1858.32	1267.55	1697.3	2295.66
M493T364_pos	Methotrexate	Amino acids and derivatives	Glutamic acid and derivatives	Glutamic acid and derivatives	ko04976(Bile secretion);	3.30933	2.5413	0.768034	29598.2	23534.5	31738.3	26039.1	32536	25943	45456.2	37694.7	43028.8	42774.4	37585.6	19486.1	5053.81	4067.77	3231.37	4050.69	3121.73	3275.46	6353.84	10054.5	6585.35	3248.93	2558.91	10027.1
M263T275_pos	Ornaline	Amino acids and derivatives	Glutamic acid and derivatives	Glutamic acid and derivatives	-	1.10962	-1.97511	3.08473	3387.57	4074.88	2855.46	3196.12	3558.39	3372.39	7736.37	7830.08	7150.31	7453.83	9132.72	8463.57	3027.13	3504.77	3176.9	4484.78	3538.29	4404.14	39225.6	41498.8	29002.5	29618.9	25456.9	22996.9
M519T33_neg	Moxalactam	Amino acids and derivatives	N-acyl-alpha amino acids and derivatives	N-acyl-alpha amino acids and derivatives	-	-0.0332557	3.14084	-3.1741	4985.98	2600.91	2926.54	3747.96	4783	2893.65	8168.25	8938.31	6969.68	8487.96	6345.67	8617.36	9169.89	11399.5	9050.45	6807.07	6569.12	5639.49	545.76	1908.13	571.834	771.21	933.294	658.114
M441T371_pos	Cephapirin	Amino acids and derivatives	N-acyl-alpha amino acids and derivatives	N-acyl-alpha amino acids and derivatives	-	0.0763318	-2.91125	2.98758	5100.83	6622.73	6093.36	5793.46	5915.45	5830.67	1926.02	1645.64	1923.12	1894.24	2215.48	2071.91	1332.07	1702.02	1839.8	1861.19	2214.34	2125.25	15989.3	12131.7	18711.1	15614	11597.2	13794.7
M368T306_pos	Cefaclor	Amino acids and derivatives	N-acyl-alpha amino acids and derivatives	N-acyl-alpha amino acids and derivatives	-	0.354179	2.68007	-2.32589	5230.22	5632.06	5178.34	5332.98	5385.6	5325.24	6845.83	5585.24	3000.41	2322.11	3114.41	5169.98	3919.78	1699.83	4379.74	1681	4175.91	4513.66	1044.68	682.878	569.667	579.205	608.541	577.837
M789T212_pos	Phomopsin_A	Amino acids and derivatives	Oligopeptides	Oligopeptides	-	0.0534135	2.47222	-2.41881	61226.5	29406.7	49244.3	42693.1	46428.8	44396.5	81217.8	85106.3	120523	87494.1	67377.2	86695.3	40437.2	99211	95974.2	68023.8	132377	73184.6	9659.06	13014.8	16889.9	18563.3	19573.5	17526.8
M424T471_pos	S-(1,2-Dichlorovinyl)glutathione	Amino acids and derivatives	Oligopeptides	Oligopeptides	ko00980(Metabolism of xenobiotics by cytochrome P450);	-2.73419	2.44889	-5.18308	5818.37	5803.34	6003.07	5764.53	5886.6	5859.01	2523.09	2709.14	4406.31	4977.69	3607.18	3759.13	12801.7	16493.9	28184.4	29505.7	28207.8	31075	636.279	775.782	574.935	805.662	637.265	596.201
M677T257_pos	2-(S-Glutathionyl)acetyl	Amino acids and derivatives	Oligopeptides	Oligopeptides	ko00980(Metabolism of xenobiotics by cytochrome P450);	5.37615	5.00608	0.370064	37165.5	37165.5	37165.5	37165.5	37165.5	37165.5	77635.7	151750	157577	213408	221969	247563	2861.78	5014.54	5484.52	1854.56	5399.15	5146.43	2952.69	2236.54	8314.17	10233.6	8494.31	1062.48
M420T368_pos	S-(2,2-Dichloro-1-hydroxy)ethyl	Amino acids and derivatives	Oligopeptides	Oligopeptides	ko00980(Metabolism of xenobiotics by cytochrome P450);	0.866241	-4.29953	5.16577	1898.92	2016.73	1902.3	1936.96	1938.34	1938.48	249.872	255.117	382.733	310.151	303.137	277.285	32.6494	162.89	323.777	217.276	127.444	111.492	5038.2	6589.76	8589.85	5265.29	6283.89	3251.03
M351T46_neg	S-Formylglutathione	Amino acids and derivatives	Oligopeptides	Oligopeptides	ko01100(Metabolic pathways);ko00680(Methane metabolism);ko01120(Microbial metabolism in diverse environments);	1.9438	2.67903	-0.735223	6602.44	6142.96	5381.66	5915.61	6211.03	6012.74	6207.86	12496.6	8063.76	9923.28	9206.96	9730.31	2224.8	2447.57	2430.83	2380.91	2446.42	2529.07	1778.64	1654.36	1849.06	1917.41	596.08	890.692
M573T206_pos	Hordatine_A	Amino acids and derivatives	Others	Amines	ko00999(Biosynthesis of various plant secondary metabolites);ko01100(Metabolic pathways);ko01110(Biosynthesis of secondary metabolites);	0.280523	3.32796	-3.04744	8215.67	7294.38	3180.5	8290.48	6090.69	5892	9096.89	27763	18669	18688.7	11488	15503.6	11877.1	15398.8	11586.5	13708.5	12781.4	17972.4	1503.76	2509.4	1286.7	2155.03	1256.77	1367
M603T507_pos	Hordatine_B	Amino acids and derivatives	Others	Amines	ko01110(Biosynthesis of secondary metabolites);ko00999(Biosynthesis of various plant secondary metabolites);ko01100(Metabolic pathways);	-1.36898	-4.23849	2.86951	861.215	675.719	636.658	528.618	811.285	695.876	130.889	122.454	128.864	116.79	151.437	185.23	315.676	278.469	328.528	333.633	449.674	452.435	2231.22	2440.41	2284.71	2885.5	2692.8	3239.4
M359T39_neg	Dihydrocapsaicin	Amino acids and derivatives	Others	Capsaicinoids and derivatives	-	-0.0703676	-2.32354	2.25317	3340.92	3615.09	2794.36	3330.35	3164.72	3303.87	2684.11	2606.51	710.597	489.535	3702.62	4411.89	965.166	760.134	5131.06	2787.47	1202.51	4488.96	10279.6	13828.4	10504	11759.3	9294.28	17442.4
M286T251_neg	Capsaicin	Amino acids and derivatives	Others	Capsaicinoids and derivatives	ko00996(Biosynthesis of various alkaloids);ko01060(Biosynthesis of plant secondary metabolites);ko01063(Biosynthesis of alkaloids derived from shikimate pathway);ko01100(Metabolic pathways);ko01110(Biosynthesis of secondary metabolites);ko04750(Inflammatory mediator regulation of TRP channels);	-3.12545	-5.46296	2.33751	55277.3	55277.3	55277.3	55277.3	55277.3	55277.3	4020.98	2561.99	3752.51	3770.38	3337.59	2425.09	26189.4	20926.5	61151.2	17946.3	21999.1	25176	138762	159984	133111	147247	144516	152735
M159T328_neg	beta-Alanyl-N(pi)-methyl-L-histidine	Amino acids and derivatives	Peptides	Peptides	ko00410(beta-Alanine metabolism);ko01100(Metabolic pathways);ko00340(Histidine metabolism);	-2.96367	-1.78444	-1.17922	7392.09	7511.86	6813.04	7364.81	7253.23	7257.92	2913.62	4752.46	3465.63	2038.95	2028.31	2710.13	26114.1	20875.2	22065.9	18733.7	23908.1	28012.8	14029.5	10863.1	9986.34	7831.91	9382.67	9600.82
M333T226_pos	Aspartame	Amino acids and derivatives	Peptides	Peptides	ko04742(Taste transduction);	2.34075	0.769001	1.57175	29745.9	29745.9	29745.9	29745.9	29745.9	29745.9	73408.5	69753.7	57893.9	62859.8	63512.4	66843.3	8171.54	19077.9	9575.9	11282.2	20437.3	9287.58	50029.3	42381.6	28233	61786.4	28975	19962.5
M187T294_neg	Glycyl-L-leucine	Amino acids and derivatives	Peptides	Peptides	-	-2.30715	-5.0773	2.77015	26612	21536.4	29686.5	32388.5	23099.2	26772.2	2525.22	3490.1	1466.61	2760.13	1433.51	2296.61	10979.9	10026.6	10662.2	10485.3	16054.1	10941.1	57732.7	58002.9	74960.3	98639.5	81058.8	101325
M274T335_pos	Ac-Tyr-OEt	Amino acids and derivatives	Tyrosine and derivatives	Tyrosine and derivatives	-	-2.8665	-0.279169	-2.58733	1147.31	892.793	698.14	1125.3	1010.46	861.887	450.738	282.296	586.551	394.68	349.216	320.99	1447.82	3146.53	3329.92	3014.13	3297.92	3153.43	714.548	389.57	536.9	454.819	427.782	369.929
M378T200_neg	3-(4-Deoxy-beta-D-gluc-4-enuronosyl)-N-acetyl-D-glucosamine	Carbohydrates	Acylaminosugars	Acylaminosugars	-	2.57883	2.83148	-0.252651	7588.28	6965.22	7100.96	5549.9	7769.24	7036.65	12222.2	8310.8	11217.9	8663.3	9580.86	8426.14	1468.25	1389.32	1841.09	1494.25	1785.07	1800.38	1340.23	1652.5	811.156	1369.36	1430.8	1603.46
M363T309_pos	3-Ketolactose	Carbohydrates	Oligosaccharides	Disaccharides	-	-0.820719	-3.62529	2.80457	46148.6	46148.6	46148.6	46148.6	46148.6	46148.6	21343.7	25203.4	26994.7	10530.8	15677	10209.7	19946.2	52274.3	39454.5	31133	25287	26124.9	207348	243676	331523	212279	183198	178891
M245T349_neg	alpha-D-Mannoheptulopyranose	Carbohydrates	Oligosaccharides	heptulose	-	-0.120479	-2.06856	1.94808	29656.6	28474.2	37432.4	31030.8	30653.8	31637.9	33055.2	37912	34964.7	40604.6	36027.6	36900	35133.8	38085.4	40850.4	34487.6	57318.9	32702.4	160661	159342	163757	156445	135951	144424
M219T324_neg	N-Acetyl-beta-D-glucosaminylamine	Carbohydrates	Oligosaccharides	Hexoses	-	-2.6324	-4.34587	1.71347	8363.7	9481.45	7690.66	7683.62	9277.32	8170.05	938.103	1500.09	1137.74	1329.47	784.459	418.69	5520.32	5623.31	7949.52	5804.6	5941.55	7037.2	21847.4	19191.9	21446.9	19590.6	21461.2	20677.7
M187T45_pos	beta-D-Fucose	Carbohydrates	Oligosaccharides	Hexoses	-	-1.08064	1.52415	-2.60479	13480.7	13480.7	13480.7	13480.7	13480.7	13480.7	14998.1	15806.9	11515.3	23682.4	12614.5	15265.8	39933.8	30524	31380.4	32339.2	29490.3	34892	6626.18	3932.97	5336.85	5643.31	5474.62	5627.74
M161T56_neg	D-Mannose	Carbohydrates	Monosaccharides	Aldoses	ko02010(ABC transporters);ko01100(Metabolic pathways);ko00052(Galactose metabolism);ko00520(Amino sugar and nucleotide sugar metabolism);ko00051(Fructose and mannose metabolism);	-2.45845	-0.668602	-1.78985	11909.8	17368.7	12986.9	14115.7	13865.8	13829.8	11618.5	3802.18	7247.69	5305.31	6714.47	4757.99	51199.3	38834.8	26100.3	37821.3	33942.4	28907.5	15440.8	10769	9319.17	8403.26	9607.11	9161.47
M219T260_pos	D-Glucose;Grape sugar;Dextrose;Glucose;D-Glucopyranose	Carbohydrates	Monosaccharides	Aldoses	ko04933(AGE-RAGE signaling pathway in diabetic complications);ko00901(Indole alkaloid biosynthesis);ko00500(Starch and sucrose metabolism);ko01100(Metabolic pathways);ko02010(ABC transporters);ko00052(Galactose metabolism);ko00010(Glycolysis / Gluconeogenesis);ko00520(Amino sugar and nucleotide sugar metabolism);ko01110(Biosynthesis of secondary metabolites);ko00030(Pentose phosphate pathway);	-1.51838	1.55033	-3.06871	21791.9	11072.8	17738.5	18317.9	18345.5	15396.2	6511.43	14369.6	9258.07	15995.8	9814.31	12695.2	44110.2	47509.7	36059	23341.4	36659.5	8965.8	1384.86	4889.53	4507.84	4134.43	3923.68	4597.05
M198T260_pos	L-Galactose	Carbohydrates	Monosaccharides	Aldoses	ko01110(Biosynthesis of secondary metabolites);ko01100(Metabolic pathways);ko00053(Ascorbate and aldarate metabolism);	-0.372476	1.65741	-2.02989	111646	108634	106628	97403.1	115570	106422	90478.2	114051	112370	90406.9	98146.6	103151	160785	142126	107583	91142.4	198490	87756.8	28370.8	30516.5	32680.7	32376.3	32039.7	36948.1
M198T307_pos	D-(+)-Galactose	Carbohydrates	Monosaccharides	Aldoses	ko00052(Galactose metabolism);ko01100(Metabolic pathways);	-1.15513	2.33772	-3.49285	184195	184195	184195	184195	184195	184195	183732	315049	323548	238752	106864	137638	497167	745607	332377	468053	517944	346438	32577	44188.2	59927.7	33485.7	46196.3	41899.3
M149T307_neg	D-Xylose	Carbohydrates	Monosaccharides	Aldoses	ko01100(Metabolic pathways);ko02010(ABC transporters);ko00040(Pentose and glucuronate interconversions);ko00520(Amino sugar and nucleotide sugar metabolism);	-1.80964	1.0534	-2.86303	402547	311713	354617	336239	362310	354030	318064	282760	246444	309866	269101	305291	948048	877389	995262	999860	1.06253e+06	1.18685e+06	68776.2	80371.2	131768	134851	244165	174373
M209T330_neg	D-Lyxose	Carbohydrates	Monosaccharides	Aldoses	ko00040(Pentose and glucuronate interconversions);	-1.07928	1.72675	-2.80603	226316	233212	226814	228690	228724	228745	230538	283419	207775	278868	251659	228641	388276	457330	513218	539420	612690	618182	70192.3	68332.4	68974.2	77460.3	83174.4	79294.1
M171T307_neg	D-Arabinose	Carbohydrates	Monosaccharides	Aldoses	ko00040(Pentose and glucuronate interconversions);ko00053(Ascorbate and aldarate metabolism);ko00520(Amino sugar and nucleotide sugar metabolism);ko01100(Metabolic pathways);ko01250(Biosynthesis of nucleotide sugars);	0.553904	2.91872	-2.36482	59644.6	29739.4	67376.7	46996.2	46430.8	50442.8	110151	62570	132736	61768.3	106014	82372.7	84474.6	15755.1	89939.1	81631.5	68291.6	38376.3	15446.4	9951.37	14821.7	19859.2	7831.46	5566.18
M301T43_pos	L-Arabinose	Carbohydrates	Monosaccharides	Aldoses	ko00040(Pentose and glucuronate interconversions);ko00053(Ascorbate and aldarate metabolism);ko00520(Amino sugar and nucleotide sugar metabolism);ko01100(Metabolic pathways);ko01250(Biosynthesis of nucleotide sugars);ko02010(ABC transporters);	2.14614	0.836666	1.30948	20996.1	18296	24894.3	20281.8	20195.3	21558.8	50567	46030.9	52300.2	36368.8	46952.4	40740.4	16329.2	8166.66	8401.01	7808.11	9536.15	11424.8	23334.9	24783.6	28980	29440.2	22970.2	23331.1
M195T236_pos	D-Ribose	Carbohydrates	Monosaccharides	Aldoses	ko00030(Pentose phosphate pathway);ko01100(Metabolic pathways);ko02010(ABC transporters);ko02030(Bacterial chemotaxis);	5.77605	4.92316	0.852891	12994.4	12994.4	12994.4	12994.4	12994.4	12994.4	35621.1	21744.7	15978.1	23552.3	24943	29068.8	426.501	469.966	334.036	536.667	388.315	598.414	939.36	1194.41	436.832	903.476	1025.16	474.622
M163T259_pos	3,6-Anhydrogalactose	Carbohydrates	Monosaccharides	Aldoses	-	-1.08713	2.02936	-3.11648	140247	216281	199480	163419	164646	188134	153398	174174	158493	171111	151311	156429	157592	195846	278929	459020	403786	554797	38771.4	39126.3	36342.1	37636.2	42603.4	41890.9
M310T429_pos	N-Acetylneuraminate	Carbohydrates	Monosaccharides	Amino sugars	ko00520(Amino sugar and nucleotide sugar metabolism);ko01100(Metabolic pathways);	-0.941491	-2.34998	1.40849	1340.31	1340.31	1340.31	1340.31	1340.31	1340.31	923.142	851.041	1045.07	810.393	1701.32	666.049	589.875	819.084	2133.95	2599.07	2865.45	2509.92	4294.71	4249	5304.41	5220.88	6958.4	4546.39
M180T259_pos	D-Galactosamine;D-Chondrosamine;2-Amino-2-deoxy-D-galactose	Carbohydrates	Monosaccharides	Amino sugars	ko00052(Galactose metabolism);	-1.50601	2.04724	-3.55325	245890	316554	310822	293160	284759	286752	257027	257095	264200	259858	269794	268755	476780	817127	878235	788708	518880	998542	63173.7	60672	64244.2	64878.2	61250	67265.1
M202T250_pos	D-Glucosamine;Chitosamine;2-Amino-2-deoxy-D-glucose	Carbohydrates	Monosaccharides	Amino sugars	ko01100(Metabolic pathways);ko00520(Amino sugar and nucleotide sugar metabolism);	-1.23795	1.01976	-2.2577	8664.59	7608.83	8664.68	8664.39	8182.12	8345.11	8026.08	7312.19	7643.17	6334.11	5391.2	6435.63	20692.6	15312.5	17413.5	14813.1	14867.2	13940.7	3585.37	4508.99	2879.21	3569.56	2554.66	3193.63
M180T309_pos	D-Mannosamine	Carbohydrates	Monosaccharides	Amino sugars	-	-0.838311	2.7851	-3.62341	144405	105847	60567.6	93549	105307	99558.8	93546.7	102199	94082.8	117847	84389.4	109051	209880	286438	276986	122546	63733.3	115185	14001.6	22991.1	9711.34	10380.6	11368.5	18755.6
M204T311_neg	N-Acetyl-D-fucosamine;2-Acetamido-2,6-dideoxy-D-galactose	Carbohydrates	Monosaccharides	Amino sugars	-	-0.993949	1.4226	-2.41655	68545.2	74404.9	69456.6	70425.3	70683.6	70740.6	56948.8	68264.2	70429.9	85611.8	84064.6	56005.7	138466	132892	175382	145873	134101	112409	22648.3	24214.4	29684.2	27578.6	30967.1	22078.4
M206T389_pos	N-Acetyl-D-quinovosamine	Carbohydrates	Monosaccharides	Amino sugars	-	-1.04873	1.1658	-2.21453	4477.16	4477.16	4477.16	4477.16	4477.16	4477.16	6266.96	5802.52	5217.19	4650.07	4707.79	5580.35	10534.2	11179.9	9316.01	10720.5	13480.1	11433.3	3165.21	3008.36	2139.48	1948.37	1777.96	2323.79
M163T322_neg	L-Rhamnose	Carbohydrates	Monosaccharides	Deoxy sugars	ko00051(Fructose and mannose metabolism);	-1.99004	0.0168505	-2.00689	7390.63	9665.63	8256.37	7779.93	7049.19	9128.24	4717.75	5149.72	4458.42	6545.55	5530.09	7038.59	19861.1	20206	24602.3	21539	20875.8	25755.9	5490.05	4985.92	5585.68	5508.69	5946.73	5534.75
M187T151_pos	6-Deoxy-L-galactose	Carbohydrates	Monosaccharides	Deoxy sugars	ko01100(Metabolic pathways);ko00051(Fructose and mannose metabolism);ko00520(Amino sugar and nucleotide sugar metabolism);	-1.50564	1.82828	-3.33392	38176.4	38176.4	38176.4	38176.4	38176.4	38176.4	52708.9	35686.3	30288.5	18203	25586	29375	69816.3	75741	71485.1	72569.3	102719	152423	13022.2	12437	6550.26	5346.51	6687.41	9980.92
M133T106_neg	2'-Deoxy-D-ribose	Carbohydrates	Monosaccharides	Deoxy sugars	ko00030(Pentose phosphate pathway);	-2.59856	3.66183	-6.26039	627605	615928	644437	623236	657474	614157	387090	395118	370448	364906	320966	415588	2.52311e+06	2.24198e+06	2.26308e+06	2.1954e+06	2.12867e+06	2.30051e+06	36396.7	28090.2	20913.5	31778.8	31783.3	29134.3
M209T350_neg	Sedoheptulose;D-altro-Heptulose;D-Sedoheptulose;Volemulose	Carbohydrates	Monosaccharides	Ketoses	ko00710(Carbon fixation in photosynthetic organisms);	-2.03113	-1.12081	-0.910313	328024	328024	328024	328024	328024	328024	177526	136752	270786	167909	157552	178027	636276	703464	787003	849788	735470	737167	352502	377885	430201	384323	404208	418149
M219T341_pos	L-Sorbose	Carbohydrates	Monosaccharides	Ketoses	ko00051(Fructose and mannose metabolism);	-1.45289	1.86545	-3.31834	9909.74	9909.74	9909.74	9909.74	9909.74	9909.74	5873.52	7132.23	7719.04	5194.13	12047.3	4826.13	7702.95	23519.8	18152.5	21595.6	21860.3	24315.2	1640.02	969.137	1910.86	2117.35	2531.1	2575.35
M233T320_pos	Coriose	Carbohydrates	Monosaccharides	Ketoses	-	-1.31081	4.97827	-6.28908	76147.6	74984.5	64476.8	81656.6	70173.7	72965.3	112037	88562.9	77936.7	51461.4	63816.9	55021.8	200189	220097	169268	170720	177695	175505	1664.65	2221.5	4669.21	412.548	2636.31	2634.79
M89T256_neg	Glyceraldehyde	Carbohydrates	Monosaccharides	Others	-	-1.71779	0.71131	-2.4291	84213.3	49442.3	72965.9	36344.4	78908	63832.7	61512.6	75828.3	65235.1	61801.2	51823.5	53279.5	271693	160463	233881	191495	188295	169510	42671.7	47492.1	48386.4	30580.5	33021.8	23513.1
M195T361_neg	D-gluconate	Carbohydrates	Monosaccharides	Sugar acids	ko01110(Biosynthesis of secondary metabolites);ko00030(Pentose phosphate pathway);ko01200(Carbon metabolism);ko01100(Metabolic pathways);	-1.15021	-2.15295	1.00274	41521.3	45201.2	47380.1	39110.7	70380.9	35107.2	24651	25576.8	32811.7	30527.7	33461.4	39294	56721.9	56465.8	63123.9	70404.4	83883.4	82937.7	109330	128673	137481	131508	151467	170185
M237T367_neg	3-Deoxy-D-manno-octulosonate	Carbohydrates	Monosaccharides	Sugar acids	ko01100(Metabolic pathways);	1.85623	3.52278	-1.66655	262261	247969	237129	259339	248969	250257	428162	368575	437461	367795	391059	415322	93834.8	111553	116720	120546	103677	118854	30276.9	40299.5	31805.1	39168.2	30606.2	37380.8
M193T417_neg	D-Galacturonate	Carbohydrates	Monosaccharides	Sugar acids	ko00040(Pentose and glucuronate interconversions);ko00053(Ascorbate and aldarate metabolism);ko00520(Amino sugar and nucleotide sugar metabolism);ko02010(ABC transporters);ko01100(Metabolic pathways);	-1.3784	-2.92654	1.54814	25199.7	10733.8	22036.3	27001.4	18353.5	17936.9	12648.8	8404.12	10954.6	15883.2	9850.48	9223.19	31516.2	27144.4	28878.8	37516.1	25312.9	23725.8	96987.5	98567.7	88063.6	80778.3	70373.4	74350.2
M181T293_neg	D-Sorbitol;D-Glucitol;L-Gulitol;Sorbitol	Carbohydrates	Monosaccharides	Sugar alcohols	ko01100(Metabolic pathways);ko02010(ABC transporters);ko00052(Galactose metabolism);ko00051(Fructose and mannose metabolism);	0.655987	-1.4421	2.09808	48103.3	43394.2	71884.3	46219.3	52018.9	52511.9	72910.5	47590.5	91831.9	52342.3	62928.3	54961.1	35713.6	30861.4	52328.9	42265.4	46405.4	35216.6	180731	150284	210496	178221	164698	155057
M300T449_neg	N-Acetyl-D-glucosamine 1-phosphate	Carbohydrates	Acylaminosugars	N-acyl-alpha-hexosamines	-	-0.574234	-5.68315	5.10892	15920.1	15920.1	15920.1	15920.1	15920.1	15920.1	2123.58	2907.69	3169.31	2361.05	1673.06	2030.37	4325.34	3451.4	3254.41	3031.51	3820.61	3355.77	114102	116482	112701	130812	138221	120629
M360T462_pos	Lactulose	Carbohydrates	Oligosaccharides	Others	-	0.241971	-3.94547	4.18744	5373.54	5356.76	5277.46	5479.23	5308.12	5351.87	1106.33	1280.6	1259.83	1294.87	1456.86	1603.73	744.583	941.733	1175.14	1330.26	1143.22	1431.66	20411.6	20418.7	21838.2	19526.4	19805.9	21285.5
M539T445_neg	Umbelliferose	Carbohydrates	Oligosaccharides	Others	-	0.369476	-4.69153	5.061	12534.2	15144.5	13546	13747.4	13589.4	13682.5	3996.95	4504.75	5406.2	4063.6	4517.36	3828.71	1702.15	4758.57	4555.28	3145.55	3416.37	2793.57	135549	106154	119815	98638.1	120492	99392.6
M325T260_neg	2-O-alpha-L-Rhamnopyranosyl-D-glucopyranose	Carbohydrates	Oligosaccharides	Others	-	2.40032	2.56559	-0.165273	6389.72	6246.56	7032.68	6342.43	6239.14	6676.14	13495	13250.4	11617	11417.3	12312.2	10857.3	2817.68	1860.33	2147.54	2231.21	2243.88	2517.59	1816.79	2267.23	2007.31	2013.82	2101.77	2115.63
M341T136_neg	Xylobiose	Carbohydrates	Oligosaccharides	Disaccharides	ko02010(ABC transporters);	2.5837	4.64139	-2.05769	35617.7	35617.7	35617.7	35617.7	35617.7	35617.7	44030.5	75922.3	76713.4	59898.1	16785.6	70026.5	16738.6	3277.67	11323.9	7881.1	10448.8	7609.25	2026.83	5488.88	1512.47	2450.47	1134.12	1145.76
M341T461_neg	D-(+)-Melibiose	Carbohydrates	Oligosaccharides	Disaccharides	ko02010(ABC transporters);ko00052(Galactose metabolism);	0.762547	-5.91655	6.67909	96363.9	104729	100657	97865	100692	100230	10538.1	10094.6	10521.5	10129.8	10074.2	10774.1	5959.41	8581.9	6597.49	5139.73	5549.04	4796.56	676618	592992	646275	673826	593955	569299
M381T369_pos	D-Lactose	Carbohydrates	Oligosaccharides	Disaccharides	ko00052(Galactose metabolism);ko01100(Metabolic pathways);ko02010(ABC transporters);	-1.80043	-4.28971	2.48928	2.19367e+06	2.22402e+06	2.54402e+06	2.23573e+06	2.51434e+06	2.19873e+06	160069	276342	279904	318342	289468	355847	211688	783537	1.18602e+06	1.29297e+06	991068	1.38645e+06	5.76197e+06	5.52718e+06	5.18794e+06	4.94565e+06	5.20361e+06	6.23098e+06
M401T369_neg	Isomaltose	Carbohydrates	Oligosaccharides	Disaccharides	ko00500(Starch and sucrose metabolism);	-0.515581	-9.32895	8.81337	204483	204483	204483	204483	204483	204483	1289.04	1666.96	1607.43	1879.63	1445.47	1636.81	2387.26	2173.95	2419.68	2018.97	2220.87	2396.38	1.00596e+06	1.05919e+06	1.08154e+06	984996	949752	1.04451e+06
M360T370_pos	Cellobiose	Carbohydrates	Oligosaccharides	Disaccharides	ko00500(Starch and sucrose metabolism);ko02010(ABC transporters);ko01100(Metabolic pathways);	-1.27639	-5.96746	4.69107	42915	42915	42915	42915	42915	42915	1917.51	2205.13	2122.46	2217.64	2063.82	1958.81	2893.56	5153.87	2838.01	7378.27	6942.23	5037.72	126741	115971	138688	141829	128399	129617
M365T370_pos	D-Maltose	Carbohydrates	Oligosaccharides	Disaccharides	ko00500(Starch and sucrose metabolism);ko01100(Metabolic pathways);ko02010(ABC transporters);	-2.05911	-6.77436	4.71526	1.48534e+06	1.29691e+06	1.41559e+06	1.38492e+06	1.40963e+06	1.39569e+06	51006.8	33407.6	50553.5	20326.4	41304.5	22292.5	82460.1	168300	125491	193342	155845	186744	4.26075e+06	4.20753e+06	3.98848e+06	3.50713e+06	4.18856e+06	3.8091e+06
M341T369_neg	Sucrose; Cane sugar; Saccharose; 1-alpha-D-Glucopyranosyl-2-beta-D-fructofuranoside	Carbohydrates	Oligosaccharides	Disaccharides	ko00500(Starch and sucrose metabolism);ko01100(Metabolic pathways);ko02010(ABC transporters);ko00052(Galactose metabolism);	-1.15426	-10.8381	9.68379	2.90581e+06	2.90581e+06	2.90581e+06	2.90581e+06	2.90581e+06	2.90581e+06	7484.63	8661.96	8703.48	5459.17	8518.32	10044.9	15052.5	16689.5	19904.2	14844.2	25120.9	17164	1.50458e+07	1.4665e+07	1.6509e+07	1.41213e+07	1.36977e+07	1.5424e+07
M341T437_neg	alpha,alpha-Trehalose	Carbohydrates	Oligosaccharides	Disaccharides	ko00500(Starch and sucrose metabolism);ko01100(Metabolic pathways);ko01110(Biosynthesis of secondary metabolites);ko02010(ABC transporters);	0.093752	-2.75976	2.85351	22520	22737.4	22422.6	22645.3	22546.3	22570.4	18434	19083.4	17101.9	10491.8	10158.1	9641.16	13147.6	12937.8	13344.8	13269.7	13547.4	13320.8	91891.3	104059	89844.1	89825.6	102468	96996.1
M365T317_pos	Turanose	Carbohydrates	Oligosaccharides	Disaccharides	-	-2.01972	1.79103	-3.81075	73940.9	73940.9	73940.9	73940.9	73940.9	73940.9	103423	65621.6	44524.8	62695	66118.5	39531.9	190954	163806	359887	378079	332552	123403	16644.2	15827.7	17572.6	20475.7	20766.8	19073.1
M365T446_pos	Nigerose	Carbohydrates	Oligosaccharides	Disaccharides	-	0.17883	-2.10607	2.28491	53921.4	52429.5	49559.1	53455.3	51981.2	52167.1	51826.9	35756.8	29982.6	32521.1	58251.5	31776.2	13041.6	24683.2	23118	50177.5	48314.3	52787.7	242852	177294	170407	140445	143531	159211
M365T462_pos	Mannobiose; alpha-1,6-Mannobiose; alpha-D-Manp-(1->6)-D-Manp	Carbohydrates	Oligosaccharides	Disaccharides	-	-0.302232	-4.6827	4.38047	98266.6	83946.4	90189.6	95120.5	90325.7	91146.9	15006.1	19103.5	15743.4	14025.2	14535.7	13794.1	20901	20286.8	20501.4	16544.7	21056.7	14406.6	505819	443744	418834	320521	330874	348314
M365T503_pos	Kojibiose	Carbohydrates	Oligosaccharides	Disaccharides	-	-1.82965	-2.08878	0.259125	17920.1	12901.9	18698	19358.2	15365.8	16641.7	9188.11	9214.47	8082.41	7583.27	7486.26	6896.94	13763.1	37639.7	44373.4	21287.6	15751.9	39405.6	45576.5	40593	37864.8	24836.5	29533.6	27702
M307T371_pos	Maltulose	Carbohydrates	Oligosaccharides	Disaccharides	-	-0.185299	-3.74409	3.55879	4302.21	5163.44	4683.99	5226.9	4330.47	4862.37	849.579	725.507	911.84	913.982	1108.34	1349.41	716.91	915.487	994.783	1239.43	1368.31	1426.69	10764.2	10990.6	13629.1	15238.6	15205.5	12674
M343T370_pos	Gentiobiose	Carbohydrates	Oligosaccharides	Disaccharides	-	-0.568798	-5.91605	5.34726	13033.4	13033.4	13033.4	13033.4	13033.4	13033.4	555.698	572.937	824.654	606.404	693.89	670.434	577.54	972.57	881.952	1044.03	1185.21	1159.14	39257.9	38810.1	46276.1	38759.7	36755.9	37081.4
M343T462_pos	Laminaribiose	Carbohydrates	Oligosaccharides	Disaccharides	-	0.249407	-5.06244	5.31185	6539.47	4613.55	6223.04	4659.61	6823.41	5285.03	692.704	975.043	743.601	1190.55	1048.42	210.78	607.115	536.479	755.816	878.808	861.917	449.223	29520	27784.9	18547.2	31191.8	19714.4	35677.1
M365T258_pos	Palatinose	Carbohydrates	Oligosaccharides	Disaccharides	-	-3.1625	0.941475	-4.10398	26320	26541	20801.9	25547.5	23843.4	25061.3	18661.1	23586.3	35583.8	24846.7	23258.1	19064.8	67320.8	177016	307423	191780	326346	228423	17345.2	21474.9	13564.6	8884.83	8217.74	6014.66
M377T462_neg	Sophorose	Carbohydrates	Oligosaccharides	Disaccharides	-	-0.33599	-5.25059	4.9146	2691.23	5873.8	5981.31	5796.76	4106.31	4511.87	1038.27	1209.43	1468.49	1382.66	1476.19	1806.38	900.359	1302.08	1221.03	2424.47	1810.71	2920.74	55775.3	37770.5	69210.2	46776.6	54333	55216.2
M381T463_pos	Melibiulose	Carbohydrates	Oligosaccharides	Disaccharides	-	-0.517172	-2.7132	2.19603	17316.7	17316.7	17316.7	17316.7	17316.7	17316.7	6172.26	9035.47	6248.34	6905.87	8559.88	10572.5	2578.6	8084.5	13965	12624.7	13276.3	17442.2	63736.6	54283.6	54004.8	44264.6	47136.2	48029.2
M325T319_neg	Scillabiose	Carbohydrates	Oligosaccharides	Disaccharides	-	0.196769	-3.68153	3.8783	23357.1	22108	23780.7	22926.6	23018.7	23074.3	6687.85	7277.95	19386.2	7962.77	7858.15	6254.52	6672.26	3767.97	11202.4	9518.2	8593.3	8606.47	108661	104501	117273	124508	128345	127886
M342T392_neg	Rutinose	Carbohydrates	Oligosaccharides	Disaccharides	-	0.264691	-2.00144	2.26613	5274.88	7390.42	5878.71	5833.09	7595.47	5440.75	9811.67	11707	9856.48	10621.8	11161.5	11734.9	8492.66	8037.94	9465.3	9253.95	9705.11	9060.73	55155.1	26581.9	53754	28947.1	42573.9	52819.7
M689T499_pos	Maltotetraose	Carbohydrates	Oligosaccharides	Others	-	-1.73229	-6.43638	4.70409	389269	327694	378969	389290	357522	367670	11726.2	14773.5	12184.7	12745	13815	13814	24246.4	31830.9	46767	59976.2	37111.6	62743.7	1.55684e+06	1.05663e+06	1.12298e+06	1.00645e+06	1.00112e+06	1.10285e+06
M543T499_pos	Melezitose	Carbohydrates	Oligosaccharides	Others	-	-2.2594	-4.81443	2.55504	9342.46	9342.46	9342.46	9342.46	9342.46	9342.46	979.85	1064.74	204.166	1394.48	1464.72	1159.3	602.926	2480.89	6834.75	5610.98	7313.51	7164.04	34341.7	26692.6	30433.5	31939	29771.1	23168.4
M1013T520_pos	Maltohexaose	Carbohydrates	Oligosaccharides	Others	ko00500(Starch and sucrose metabolism);ko01100(Metabolic pathways);ko01110(Biosynthesis of secondary metabolites);ko02010(ABC transporters);	0.173441	-3.51709	3.69053	1967.27	1967.27	1967.27	1967.27	1967.27	1967.27	1061.52	1669.04	774.677	631.654	477.475	540.875	834.445	1252.66	493.198	457.614	727.443	805.916	13398.3	11551.3	7367.56	5943.99	8057.65	12701.2
M829T175_pos	Amylopectin	Carbohydrates	Oligosaccharides	Others	-	0.738538	-3.82058	4.55912	17819.5	18009.2	14831.5	18094.3	17143	16827.1	6238.52	4774.6	4253.68	5660.37	3269.9	5108.03	3326.81	2954.42	2845.44	2989.75	2764.44	2683.05	58302.4	54170.5	87904.2	71159.4	78354.4	64158.8
M503T414_neg	Gentianose	Carbohydrates	Oligosaccharides	Others	-	2.85574	-2.56745	5.42319	46241.1	48039.6	49294.8	51534.7	46323.7	48308.8	24797.2	41236	27978.6	41773.5	35562	37790.6	4456.32	4490.15	4874.29	4559.94	5259.07	5251.69	190399	194567	230305	211531	202148	210741
M525T447_neg	1F-beta-D-Fructosylsucrose	Carbohydrates	Oligosaccharides	Others	-	-0.592619	-2.52551	1.93289	6343.72	6343.72	6343.72	6343.72	6343.72	6343.72	4039.38	4460.65	2017.58	2462.91	2182.56	2318.21	6210.37	6340.76	5175.35	3502.06	3554.19	1578.74	22460.1	19205.5	19366.8	12415.8	11959.9	15244.8
M527T419_pos	Isomaltotriose	Carbohydrates	Oligosaccharides	Others	ko02010(ABC transporters);	4.86214	-0.095548	4.95769	239989	226322	196057	272985	210956	226304	307609	544538	282424	459691	399779	364770	9080.71	19100.6	10729.1	16535.4	12721.7	12936.5	506273	463558	375489	391122	385934	397946
M503T446_neg	Maltotriose	Carbohydrates	Oligosaccharides	Others	ko02010(ABC transporters);	-0.369155	-4.15979	3.79063	99284.5	119622	110603	109428	109639	108647	34701.7	30754.7	28561	33276.2	29871.8	28108	33735.3	33424.1	54929.9	33702.6	50849.8	32656.7	602843	487469	599985	490350	563048	567880
M425T69_pos	Chitobiose; Diacetylchitobiose; N,N'-Diacetylchitobiose	Carbohydrates	Oligosaccharides	Others	ko02010(ABC transporters);ko00520(Amino sugar and nucleotide sugar metabolism);ko01100(Metabolic pathways);	-0.326246	2.33332	-2.65957	14414.7	9885.82	19298.4	10970.4	14506.6	13600.4	30092.3	39430.3	32745.1	57547.4	36794.8	29438	41973.4	52799.6	41563.4	80104.2	38990.8	27975.4	6247.32	7357.62	8401.58	7411.47	6324	9111.9
M665T498_neg	Stachyose	Carbohydrates	Oligosaccharides	Others	ko00052(Galactose metabolism);	-1.41706	-9.15063	7.73356	97471.2	97471.2	97471.2	97471.2	97471.2	97471.2	1452.06	1123.44	344.314	2331.44	1129.61	673.895	2805.54	2916.25	3119.75	3862.72	3260.94	2873.87	686757	575923	638347	670229	743367	694915
M684T499_pos	Cellotetraose	Carbohydrates	Oligosaccharides	Others	-	2.85956	-3.23638	6.09594	18846.1	19386.9	18626.5	18969.4	18907.8	18987.3	366.857	7314.55	7074.61	9192.99	8873.09	9523.61	656.039	288.476	1383.25	1652.81	1631.9	221.943	70052.2	66766.1	74421.9	72675.7	50132.9	65028.6
M387T463_pos	Inulobiose	Carbohydrates	Oligosaccharides	Others	-	0.216833	-2.18042	2.39725	1763	1763	1763	1763	1763	1763	845.899	1026.34	1253.67	1716.97	2270.24	2374.16	682.321	784.854	1050.18	1332.83	1900.76	2412.4	5827.59	5018.65	8038.51	7203.46	7471.6	9444.56
M522T447_pos	beta-1,2-Mannotriose	Carbohydrates	Oligosaccharides	Others	-	0.799269	-1.78131	2.58058	8426.67	11060.9	9339.75	8905.25	7079.85	11093.8	7872.23	9097.81	7930.24	8022.57	15998.5	6641.54	3687.7	4484.96	5838.44	8758.02	4704.3	4455.24	33570	28732.3	37115.2	24743.6	32635	34194.5
M541T446_neg	Cellotriose	Carbohydrates	Oligosaccharides	Others	-	-0.193612	-2.165	1.97139	14849.5	14849.5	14849.5	14849.5	14849.5	14849.5	12419.8	46989.1	15129.7	11121.8	13209.1	11967.4	14179.4	13683.8	47612.5	15521.5	18109.4	17649	92811.1	69922.1	90576.3	79855.3	81828.5	82072.5
M505T499_pos	Raffinose	Carbohydrates	Oligosaccharides	Others	ko00052(Galactose metabolism);ko01100(Metabolic pathways);ko02010(ABC transporters);	-0.695279	-6.51955	5.82427	2507.38	2549.04	2488.76	2528.98	2494.75	2526.26	89.5593	134.223	101.443	102.26	103.619	106.969	183.498	163.074	142.636	147.345	202.035	194.576	9870.16	8935.32	11997.7	11144	8282.6	8309.9
M827T519_neg	Cellopentaose	Carbohydrates	Oligosaccharides	Others	-	-0.0187637	-7.06294	7.04417	6063.49	6304.87	5822.44	6677.77	5547.93	6340.31	79.1284	610.518	627.77	115.151	103.103	73.0962	328.544	154.486	377.288	432.031	131.258	206.22	34004.8	35288.2	32900.5	39200.4	32820.8	40889.5
M851T498_pos	Verbascose	Carbohydrates	Oligosaccharides	Others	-	1.23184	-2.80363	4.03546	5814.52	5814.52	5814.52	5814.52	5814.52	5814.52	2334.92	4747.19	2080.99	1679.61	1724.42	5385.09	267.573	1538.22	1753.54	1262.18	1426.33	1395.75	31615.1	21415.7	18797.1	18510.1	16674.7	18328.3
M349T321_pos	Robinobiose	Carbohydrates	Oligosaccharides	Others	-	-0.208786	-3.10009	2.8913	51131.1	51138.4	44377.8	55587.5	47562.7	49675.1	12925.9	3690.92	9424.79	6700.52	3860.72	8871	10091.3	9093.32	9305.82	7246.9	7486.92	9330.58	55254.7	60805.9	61498.1	66368.5	70944.3	75053.9
M239T305_neg	Alpha-D-Glucose	Carbohydrates	Monosaccharides	Monosaccharides	ko00010(Glycolysis / Gluconeogenesis);ko00051(Fructose and mannose metabolism);ko00052(Galactose metabolism);ko00520(Amino sugar and nucleotide sugar metabolism);ko01060(Biosynthesis of plant secondary metabolites);ko01061(Biosynthesis of phenylpropanoids);ko01062(Biosynthesis of terpenoids and steroids);ko01063(Biosynthesis of alkaloids derived from shikimate pathway);ko01064(Biosynthesis of alk…	-1.42328	1.33062	-2.7539	134769	112223	128431	125864	136539	119448	49104.1	104939	85420	113860	90114.4	46664	273192	161969	274464	223721	137961	243114	36538.2	21684.5	46287	44385.1	23592.4	22375.7
M708T206_pos	Lacto-N-tetraose	Carbohydrates	Oligosaccharides	Tetrasaccharides	-	-1.40093	0.731674	-2.1326	1860.45	3260.27	2329.58	2418.55	2392.53	2393.22	2200.29	2591.18	2634.13	2326.1	2262.76	2233.76	5249.89	5096.11	6864.99	5907.68	6835.43	7671.33	1268.42	1239.72	1152.49	1470.07	1532.19	1917.46
M767T462_neg	Celloheptaose	Carbohydrates	Oligosaccharides	Tetrasaccharides	-	1.50669	-3.73171	5.2384	2590.2	3221.44	2794.88	2858.74	2853.82	2843.68	1207.03	1041.6	1132.5	1137.08	1123.02	1433.1	382.849	538.958	508.981	409.472	375.571	273.745	17245.6	16726.6	17429	14434.1	13263.3	14882.5
M441T304_neg	Lusitanicoside	Carbohydrates	glycosyl compound	Phenolic glycosides	-	0.800073	4.27807	-3.478	19558.8	19558.8	19558.8	19558.8	19558.8	19558.8	18208.2	22587.8	25505.7	50645.4	49395.3	17913.7	18573.7	18216.5	22086.5	17040.4	15620.1	14284.9	1256.43	3393.92	817.67	1120.58	1148.32	1760.24
M634T430_pos	Delphinidin_3-(6-p-coumaroyl)glucoside	Flavonoids	Anthocyanidins and anthocyanins	Anthocyanidins and anthocyanins	ko00942(Anthocyanin biosynthesis);	2.28586	1.12494	1.16092	2104.32	2104.32	2104.32	2104.32	2104.32	2104.32	2026.11	4009.74	3390.98	4884.49	2980.23	2941.06	389.114	856.803	852.82	749.913	698.068	602.23	1442.24	1535.28	1826.32	1032.74	1834.37	1606.12
M467T214_pos	Cyanidin 3-O-glucoside;Chrysanthemin	Flavonoids	Anthocyanidins and anthocyanins	Anthocyanidins and anthocyanins	ko00942(Anthocyanin biosynthesis);	2.25892	2.31525	-0.0563364	4282.75	5204.5	2953.8	4608.6	4118.19	4082.14	9661.84	12669	10548	9664.59	9649.74	10087.1	3737.85	2109.33	2317.35	2106.07	1486.53	1255.02	2003.17	1032.17	2395.14	2683.65	1901.62	2498.08
M650T430_pos	Delphinidin 3-O-rutinoside;Tulipanin	Flavonoids	Anthocyanidins and anthocyanins	Anthocyanidins and anthocyanins	ko00942(Anthocyanin biosynthesis);	3.12179	1.56624	1.55555	2571.63	3222.7	4535.55	3178.34	3516.07	3147.23	4974.58	13052	8253.6	7430.2	5826.17	6332.73	456.251	1127.19	1000.8	919.747	998.14	767.366	2923.58	3914.61	2054.65	2619.86	2324.88	1651.87
M417T251_neg	Delphinidin_3-O-sophoroside	Flavonoids	Anthocyanidins and anthocyanins	Anthocyanidins and anthocyanins	ko00942(Anthocyanin biosynthesis);	0.78992	3.17079	-2.38087	8636.44	7674.66	8188.42	8304.52	8491.2	8013.81	12848.6	10092.7	13264.2	12449.6	10904.2	10534.8	7452.79	6617.78	8162.23	6347.06	7594.24	4366.65	1541.94	1284.43	1191.94	1477.46	1360.5	927.283
M417T59_neg	Delphinidin_3-O-(6-caffeoyl-beta-D-glucoside)	Flavonoids	Anthocyanidins and anthocyanins	Anthocyanidins and anthocyanins	ko00942(Anthocyanin biosynthesis);	4.13014	4.14043	-0.0102911	14018.6	16720.7	7640.55	12015.1	13123.4	12169.6	13286.5	17004.4	26639	20392.4	38841.7	24085.9	1501.95	1475.24	1269.9	1275.34	1297.77	1189.31	1702.64	925.546	1446.19	1183.9	1278.28	1416.01
M643T504_neg	Delphinidin 3,5-diglucoside;Delphin	Flavonoids	Anthocyanidins and anthocyanins	Anthocyanidins and anthocyanins	ko00942(Anthocyanin biosynthesis);	1.27616	-1.51672	2.79288	19010.5	19010.5	19010.5	19010.5	19010.5	19010.5	19448.5	25704.1	23342.4	28478.9	28736.3	23182.9	7223.5	8409.73	9490.12	15550	10848	9955.51	67349.8	70908.6	67496.8	85175.8	64664.5	70445.1
M481T187_neg	Delphinidin_3-O-glucoside	Flavonoids	Anthocyanidins and anthocyanins	Anthocyanidins and anthocyanins	ko00942(Anthocyanin biosynthesis);	4.5402	3.38435	1.15585	28749.6	52401.5	46126.3	49626.3	26746.5	49382.1	44414.5	74386.4	43851.4	64294.4	64119.9	44350.8	2556.81	2554.21	2527.07	2386.05	2283.39	2108.59	5177.21	1614.92	4478.57	6629.65	7427.12	6793.88
M812T430_pos	Delphinidin_3-glucoside_5-caffoyl-glucoside	Flavonoids	Anthocyanidins and anthocyanins	Anthocyanidins and anthocyanins	ko00942(Anthocyanin biosynthesis);	3.42486	1.71556	1.7093	1560.67	1650.85	1590.52	1600.72	1600.01	1598.26	2905.05	4971.32	3876.68	3242.32	3756.09	5327.25	310.192	378.189	434.083	498.267	289.951	331.373	1298.56	1721.58	1126.76	1172.84	1053.58	958.257
M493T226_neg	Pelargonidin_3-O-beta-D-glucoside_5-O-(6-coumaroyl-beta-D-glucoside)	Flavonoids	Anthocyanidins and anthocyanins	Anthocyanidins and anthocyanins	ko00942(Anthocyanin biosynthesis);	3.27366	1.87816	1.3955	9408.79	9460.32	9365.54	9412.67	9406.78	9416.85	10127.5	20654.9	11859.1	21132.6	12048	10521.2	1414.13	1851.55	1425.48	1814.77	1199.16	1223	3079.1	4643.86	3720.16	4608.74	3809.91	3626.18
M967T504_neg	Albireodelphin;Delphinidin 3,3'-diglucoside 5-(6-caffeoyl)glucoside	Flavonoids	Anthocyanidins and anthocyanins	Anthocyanidins and anthocyanins	ko00942(Anthocyanin biosynthesis);	1.57468	-1.33169	2.90637	10048.6	10048.6	10048.6	10048.6	10048.6	10048.6	13122.2	16734.7	13926.8	15419.4	13855.4	13382.8	4039.2	4691.18	4524.35	6494.61	4772.77	4497.74	29887	36326.2	31142.5	39557.9	40792.3	39864.3
M535T176_neg	Pelargonidin_3-O-(6-O-malonyl-beta-D-glucoside)	Flavonoids	Anthocyanidins and anthocyanins	Anthocyanidins and anthocyanins	ko00942(Anthocyanin biosynthesis);	2.96634	2.5912	0.375137	10850.2	28766.8	10396.3	15988.4	14878.2	14201.7	24433.3	20156.8	18950.8	19258.1	29890.5	27830.7	3068.82	3121.93	3382.59	1617.79	3391.56	3397	3540.68	4813.06	3209.48	5048.96	4559.94	2146.87
M791T463_pos	Cyanidin_3,5,3'-tri-O-glucoside	Flavonoids	Anthocyanidins and anthocyanins	Anthocyanidins and anthocyanins	ko00942(Anthocyanin biosynthesis);	0.899777	-3.37104	4.27082	22039.3	15742.1	18951.8	21375.3	18355.4	19044.6	9730.99	14777.8	9528.11	9155.97	9697.96	8880.35	1903.06	6201.63	5683.78	7087.48	6322.61	5908.9	167684	133088	102269	79400	76857.2	79805.7
M272T499_pos	Luteolinidin	Flavonoids	Anthocyanidins and anthocyanins	Anthocyanidins and anthocyanins	-	-0.591049	-5.04478	4.45373	3126.36	2560.25	3174.08	3499.93	2782.62	3003.23	360.067	282.833	270.408	226.429	270.065	230.62	490.801	433.183	349.733	390.571	371.033	435.716	7242.46	8337.65	8213.63	11157.4	8460.78	10736.3
M766T430_pos	Pelargonidin_5-O-beta-D-glucoside_3-O-beta-D-sambubioside	Flavonoids	Anthocyanidins and anthocyanins	Anthocyanidins_PK1201 Anthocyanidins	ko00942(Anthocyanin biosynthesis);	2.9668	1.67682	1.28997	1079.22	723.32	1187.89	981.302	991.219	960.358	1811.49	2270.2	2338.96	2341.64	1785.49	3280.54	130.252	233.716	297.816	380.434	275.116	451.447	806.096	738.721	797.024	709.136	708.624	565.49
M479T162_neg	Peonidin 3-O-glucoside	Flavonoids	Anthocyanidins and anthocyanins	Glycosylated cyanidin	ko00942(Anthocyanin biosynthesis);	4.08202	7.15288	-3.07086	379503	7799.64	356608	334982	402320	407534	567683	676570	591571	740757	756047	706357	41575.1	38083.6	45658.9	31368.8	40682.1	41117.3	8017.97	5766.4	4438.84	3551.39	4047.7	2559.56
M384T499_neg	Anthocyanin_3'-O-beta-D-glucoside	Flavonoids	Anthocyanidins and anthocyanins	Glycosylated delphinidin	-	1.44086	-6.63285	8.07372	5106.73	5106.73	5106.73	5106.73	5106.73	5106.73	344.726	278.099	430.416	178.354	302.333	245.314	57.0554	241.483	126.44	98.3141	87.3506	44.7349	31529.2	30579	28184.5	29423.7	28958.2	27898.1
M375T356_pos	Petunidin	Flavonoids	Anthocyanidins and anthocyanins	PK1201 Anthocyanidins	-	1.67228	2.6214	-0.949118	2912.47	2630.14	1934.72	2435.94	2580.44	2463.71	6211.19	5017.94	5416.67	4547.53	4629.61	5007.11	1142.91	1961.7	1692.32	1551.59	1839.38	1485.22	813.049	901.738	800.796	902.432	751.378	840.785
M465T470_pos	Bracteatin_6-O-glucoside	Flavonoids	Aurones	Aurones	ko00941(Flavonoid biosynthesis);	2.43418	2.69731	-0.263134	5704.04	5125.72	6604.82	5721.3	5706.06	5762.21	13201.5	14773.8	13721.8	27404.6	11963.5	27803.7	3410.85	348.696	2689.69	8011.42	3834.04	1849.15	2833.71	2818.41	2202.08	2631.72	2987.03	3312.44
M287T555_pos	Aureusidin	Flavonoids	Aurones	Aurones	-	2.02544	1.16296	0.86248	6010.26	5824.4	9131.72	6543.5	6665.27	6741.57	34567.7	19566.2	13771	27411.5	17247.3	18497	6774.5	3847.04	8874.62	4530.27	3562.95	4603.21	16283.2	8017.07	12625.7	4505.31	8940.83	8159.23
M449T590_pos	Carthamone	Flavonoids	Chalcones and dihydrochalcones	Chalcones	-	2.16611	0.843001	1.32311	16044.7	15765.1	20913.6	16915.3	17147.7	17268.4	51564.8	30170.7	41842.3	47710.1	39916.5	37980.6	4695.29	10883.2	8860.91	11470.7	10834.7	8776.12	27583.9	22429.6	23201.7	17259.1	19801.2	28640.8
M311T33_1_pos	Butein	Flavonoids	Chalcones and dihydrochalcones	Chalcones	ko00941(Flavonoid biosynthesis);	-0.505285	2.40557	-2.91085	9654.25	9654.25	9654.25	9654.25	9654.25	9654.25	6485.18	11023.4	7289.52	12329.7	6226.4	11717.6	14425.8	18538.5	13095.9	7777.54	11754.5	12577	2416.29	1276.61	1286.17	1392.48	1425.86	2596.58
M205T263_neg	Desmethylxanthohumol	Flavonoids	Chalcones and dihydrochalcones	Chalcones	ko00941(Flavonoid biosynthesis);	-0.178737	3.45327	-3.63201	75349.8	75349.8	75349.8	75349.8	75349.8	75349.8	112219	117258	99700.7	93334.5	90808.7	114280	126541	114594	141589	97164.3	113295	117192	10737.9	9240.73	7838.36	6281.39	8157.14	15043.3
M449T187_1_neg	2',3,4,4',6'-Peptahydroxychalcone_4'-O-glucoside	Flavonoids	Chalcones and dihydrochalcones	Chalcones	ko00941(Flavonoid biosynthesis);	3.38412	2.41733	0.966793	56995.7	56995.7	56995.7	56995.7	56995.7	56995.7	90361.3	120513	86746.5	91128.1	74947.8	63686.7	11578.9	11093.3	8455.02	7227.14	6117.02	6041.89	30042.6	12028.2	22416.2	18177.9	8184.62	7878.22
M295T32_pos	Naringenin_chalcone	Flavonoids	Chalcones and dihydrochalcones	Chalcones	ko00941(Flavonoid biosynthesis);ko01110(Biosynthesis of secondary metabolites);ko01100(Metabolic pathways);	-0.518646	1.62863	-2.14727	12832	12832	12832	12832	12832	12832	11552.8	18465.2	16775.2	18584.6	16670.4	16287.2	20550.1	27048.6	24785.2	25419.1	20750.3	22323.3	5916.25	925.987	6802.79	8094.8	7668.03	2393.41
M433T203_neg	Phlorizin_chalcone	Flavonoids	Chalcones and dihydrochalcones	Chalcones and dihydrochalcones_PK1212 Chalcones and dihydrochalcones	ko00941(Flavonoid biosynthesis);	2.37647	0.387693	1.98877	14010.6	13618.9	14162.7	14478.1	13766.6	13984.4	22351.5	20537.4	25394.9	22687	23580.8	21214.3	4321.47	4566.98	4576.68	4621.99	4130.44	3928.29	19689.3	20126.4	2655.06	19197.8	19883.3	22220.9
M403T506_pos	Asebogenin; Phloretin 4'-methyl ether	Flavonoids	Chalcones and dihydrochalcones	Dihydrochalcones	-	-1.97521	1.633	-3.60822	1506.67	1506.67	1506.67	1506.67	1506.67	1506.67	712.387	1020.7	946.119	937.184	687.506	792.123	3372.33	3227.19	3080.31	3594.58	3174.35	3588.1	374.939	360.402	140.825	330.327	195.065	241.483
M435T191_neg	Phlorizin	Flavonoids	Chalcones and dihydrochalcones	Dihydrochalcones	ko00941(Flavonoid biosynthesis);ko01110(Biosynthesis of secondary metabolites);	3.28344	2.09048	1.19296	10210.2	8762.87	11955.7	9007.19	10678.7	9936.16	8631.14	14728.9	13661.2	13664.5	13339.9	12859.5	1399.78	984.608	1209.71	1848.33	916.477	1537.49	754.276	6035.39	2581.73	4965.08	1863.93	1852.39
M313T41_neg	Wedelolactone	Flavonoids	Coumestanes	Coumestanes	-	4.35392	2.76553	1.58839	21578.4	20989.9	21489.1	21366.6	21359.5	21352	66918.5	67004.8	44425.1	31776.6	41315.1	36158.6	801.704	3331.4	2630.75	2702.15	2383.43	2215.14	2832.28	14148.1	2164.75	6086.48	11464.2	5598.33
M307T30_pos	Coumestrol	Flavonoids	Coumestanes	Coumestanes	ko00943(Isoflavonoid biosynthesis);ko01110(Biosynthesis of secondary metabolites);	-0.816081	2.06386	-2.87994	579.058	724.89	351.271	756.016	485.253	564.384	421.59	677.294	503.406	783.192	468.998	924.501	567.847	1217.17	1552.98	1563.98	810.963	940.403	291.185	42.3267	173.555	77.3765	30.0921	289.306
M319T37_neg	Dihydromyricetin	Flavonoids	Dihyroflavonols	Dihyroflavonols	ko01110(Biosynthesis of secondary metabolites);ko00941(Flavonoid biosynthesis);	1.74811	2.04687	-0.298759	4073.02	4608.85	4621.85	5795.48	3058.04	5264.91	9751.25	11190.5	8816.03	11661.5	11488	11948.2	3809.98	1738.33	2228.97	4280.78	3851.39	3397.47	3492.57	3364.04	1559.68	2903	1604.05	2772.24
M287T42_1_neg	Fustin	Flavonoids	Dihyroflavonols	Dihyroflavonols	ko00941(Flavonoid biosynthesis);	1.65409	-2.91622	4.57031	54673.7	56623.2	54667	55966.1	55089.3	55408.2	31261.8	28176.3	28742.7	27351.8	31482.4	27379.3	10061.4	8061.62	8676.17	8686.23	10043.1	9883.1	242281	199839	231904	187214	223166	232039
M322T384_pos	Taxifolin; Dihydroquercetin; (+)-Dihydroquercetin; (+)-Taxifolin; trans-Dihydroquercetin	Flavonoids	Dihyroflavonols	Dihyroflavonols	ko00941(Flavonoid biosynthesis);ko01110(Biosynthesis of secondary metabolites);ko01100(Metabolic pathways);	-1.13299	-2.06937	0.936381	2204.07	3237.35	1409.08	2316.21	2002.11	2308.53	602.405	1677.44	928.389	1381.51	1252.38	463.213	1363.91	2830.03	2766.42	2492.27	2373.21	2002.56	5735.85	4463.15	3934.8	4812.24	3883.27	3634.4
M345T31_neg	Taxifolin_3-O-acetate	Flavonoids	Dihyroflavonols	Dihyroflavonols	-	7.48062	2.5559	4.92472	547617	547617	547617	547617	547617	547617	1.11353e+06	764420	727370	485400	764271	630231	1333.61	4997.78	6656.38	4282.45	3853.24	3989.23	48335.2	234404	40389	207527	115316	116778
M335T435_pos	6-Methoxytaxifolin	Flavonoids	Dihyroflavonols	Dihyroflavonols	-	-1.95753	-2.31914	0.361613	31404.1	30079.9	30954.4	30774.1	30852.5	30816.6	13634.6	14523.9	13326.2	21008.6	14329.1	10646.3	22759.1	49523.2	64563.7	58752.2	76101.5	68024.9	69336.3	74805	84358.5	69665.8	67381.3	70952.2
M323T354_pos	Leucodelphinidin	Flavonoids	Flavanols	Flavan 3,4-diols	ko00941(Flavonoid biosynthesis);ko01110(Biosynthesis of secondary metabolites);	1.26122	2.47568	-1.21445	41020.4	39726.9	40938.3	40584.8	40564.8	40558.4	100396	106262	78381.2	73570.4	72777.5	82301.6	10355.7	60821.6	35933	31625	34825.8	40744.8	16880.3	18400.1	9776.27	17811.9	13200.9	16282.6
M329T47_pos	(+)-Gallocatechin	Flavonoids	Flavanols	Flavan 3-ols	ko00941(Flavonoid biosynthesis);ko01110(Biosynthesis of secondary metabolites);	4.11583	3.10598	1.00985	67871.5	54030.3	39695.4	51605.6	56451.8	52664.5	171950	159280	161092	151889	182326	175033	41107.3	3388.58	2916.65	3870.87	3421.75	3063.67	29290.8	8377.05	32240	30850.1	8084.45	7487.24
M305T216_neg	(-)-Epigallocatechin	Flavonoids	Flavanols	Flavan 3-ols	ko00941(Flavonoid biosynthesis);ko01110(Biosynthesis of secondary metabolites);	0.646004	-5.94944	6.59544	23415.6	22609	24170.4	23359.1	23390.3	23339.2	2494.34	2421.69	2195.65	2121.96	2576.94	2074.97	1486.3	1376.9	1328.15	1156	1158.6	2367.58	160311	142627	149516	125921	142360	137335
M289T91_neg	(-)-Epicatechin	Flavonoids	Flavanols	Flavan 3-ols	ko01110(Biosynthesis of secondary metabolites);ko00941(Flavonoid biosynthesis);	0.658807	-2.93008	3.58889	34567.8	62817.6	32114.2	58552.1	37114.4	43117.7	52193.6	28221.4	27293.7	29921.6	43060.2	26297.6	15210.1	22800.8	10421.7	27278	24257.3	31138.8	216141	101351	294844	259064	482651	223515
M273T151_neg	(-)-Epiafzelechin	Flavonoids	Flavanols	Flavan 3-ols	ko01110(Biosynthesis of secondary metabolites);ko00941(Flavonoid biosynthesis);	4.39214	2.32112	2.07102	36796.2	36796.2	36796.2	36796.2	36796.2	36796.2	66900.9	113959	68635.1	49822.9	55592.2	61216.3	4676.98	1605.53	4415.14	898.758	4341.02	3880.56	15664.4	14556.7	8651.44	9772	18470	16157.3
M595T343_neg	Eriocitrin; Eriodictyol 7-O-rutinoside	Flavonoids	Flavanones	Flavanones	-	0.512167	2.17751	-1.66535	2438.03	2772.82	2291.54	2519.41	2510.17	2493.66	7252.12	5038.61	4618.45	4381.44	5677.96	5464.82	4932.16	4918.36	3312.34	2144.81	3422.26	4011.36	1375.61	1269.81	1023.05	942.13	1121.52	1437.49
M612T251_pos	Poncirin;Isosakuranetin 7-O-neohesperidoside	Flavonoids	Flavanones	Flavanones	-	1.25448	2.01715	-0.762671	3870.26	2954.97	3343.34	3659.28	3361.76	3397.15	4298.03	5094.92	6752.63	5632.23	6196.08	5123.41	451.334	3077.37	3147.81	2473.46	1792.25	2930.31	1543.95	1476.63	1129.49	1519.44	1117.07	1389.95
M563T328_pos	Narirutin;Naringenin 7-O-rutinoside	Flavonoids	Flavanones	Flavanones	-	2.20549	4.36	-2.15451	4092.89	3248.21	2787.17	5057.03	3190.06	3452.37	18188.2	14287.6	14093.1	2459.55	9467.21	8201.38	2176.52	3008.32	2898.75	2165.69	2337.45	1873.95	469.451	652.417	538.211	467.445	595.921	524.561
M435T208_pos	Naringenin_7-O-beta-D-glucoside	Flavonoids	Flavanones	Flavanones	ko00941(Flavonoid biosynthesis);	2.63894	5.04153	-2.40259	16824.3	14611.7	10683.3	17267.1	13855.2	14095.4	43673.9	34031.9	37384.2	29290.2	31052.7	29625.4	10892.5	7441.9	4744.35	4152.51	4234.01	1456.1	1263.2	985.724	824.817	1659.23	618.914	874.337
M465T214_pos	Hesperetin_7-O-glucoside	Flavonoids	Flavanones	Flavanones	ko00941(Flavonoid biosynthesis);	3.04171	5.56864	-2.52693	44258.2	60659.8	30192.6	54384.8	42884.8	44294.2	137985	141213	121950	111550	120115	103771	25184.3	17053.7	15965.7	14136.2	13709.8	3399.24	2246.19	3895.22	1764.69	3238.46	2068.36	2307.13
M287T181_neg	Eriodictyol	Flavonoids	Flavanones	Flavanones	ko00941(Flavonoid biosynthesis);ko01110(Biosynthesis of secondary metabolites);	2.4364	0.341015	2.09538	30308.1	44756.3	32418.8	30556.5	40601.1	32842.1	120765	93181.1	103466	48474.6	81219.8	79477.2	14907.3	23093.2	20537.3	10778.5	11855.8	16111.7	102948	83179.3	75512	55898.7	51910	46283.2
M171T391_neg	Naringenin	Flavonoids	Flavanones	Flavanones	ko00943(Isoflavonoid biosynthesis);ko01110(Biosynthesis of secondary metabolites);ko00941(Flavonoid biosynthesis);ko01100(Metabolic pathways);	-1.41424	-3.73243	2.31819	4216.06	4938.3	3190.72	4126.82	4112.81	4093.23	1115.08	1397.73	1379.79	1354.76	1167.12	1187.46	2320.74	4012.06	3872.96	3007.39	3922.91	3124.5	16229.1	16124.7	19885.3	16758.7	15976.3	16066.5
M563T446_neg	Pinocembrin_7-rhamnosylglucoside	Flavonoids	Flavanones	Flavanones	-	-0.493525	-4.52002	4.0265	17649.9	17731.6	17389	22862.7	16405.7	18089.5	4123.56	3560.94	3451.25	4043.26	4583.21	3876.74	3840.73	4576.41	7332.8	4239.85	5313	7978.06	98502.3	71218.7	88457.5	82930.4	99662.6	101593
M547T225_2_neg	Flavanone_7-O-[alpha-L-rhamnosyl-(1->2)-beta-D-glucoside]	Flavonoids	Flavanones	Flavanones	-	3.42393	3.58647	-0.162539	4257.32	4257.32	4257.32	4257.32	4257.32	4257.32	6228.68	6969.97	6830.89	9932.44	9688.03	9697.54	745.878	935.833	877.008	820.822	597.21	621.139	445.997	868.274	481.999	868.049	762.934	680.737
M454T294_neg	Kurarinone	Flavonoids	Flavanones	Flavanones	-	-0.472388	-3.43215	2.95976	3016.61	4059.44	3996.02	3606.47	2780.31	4136.21	569.079	1272.17	958.515	530.314	877.852	1037.41	574.732	1709.99	1645.35	1087.97	1386.76	872.597	9960.42	9127.1	9566.08	8500.73	9185.76	10277.8
M359T255_neg	2,3-Dihydro-2-(4-hydroxyphenyl)-5,6,7,8-tetramethoxy-4H-1-benzopyran-4-one	Flavonoids	Flavanones	Flavanones	-	-1.81309	1.64156	-3.45465	128481	141537	132698	135886	124102	139257	86957.6	88747.1	101574	105711	88332	89088.6	373765	326927	230848	318508	330951	388250	27973.9	28113.8	33299.6	28178.3	31483.3	30568.5
M683T462_neg	Methyl_hesperidin	Flavonoids	Flavanones	Flavanones	-	1.45393	-4.44395	5.89788	894.545	836.206	990.697	864.389	901.745	901.657	492.639	513.527	383.545	600.165	569.891	592.442	183.29	231.789	149.172	180.77	234.724	170.897	10987	9808.72	11877.6	11799.6	12810.9	11324.6
M449T257_neg	Neocarthamin	Flavonoids	Flavanones	Flavanones	-	2.0637	3.03074	-0.967042	49323.7	49323.7	49323.7	49323.7	49323.7	49323.7	83524.9	74217.5	83135.7	90502.1	107114	93079.8	18996.9	15519.5	24538.1	22042.6	23399.7	22656.6	7736.45	8156.51	10474.2	13415.6	13327.4	11935.7
M466T222_neg	Astilbin	Flavonoids	Flavanones	Flavanones	-	2.11438	1.38304	0.731337	2817.52	5183.01	3218.05	3065.75	4296.62	3285.57	4072.56	5294.75	5451.75	7478.08	6967.67	7556.5	1362.16	1263.86	1418.19	1640.3	1215.68	1603.5	2034.95	2603.08	2351.24	1358.2	2871.54	2898.65
M343T159_pos	2,3-Dihydrogossypetin	Flavonoids	Flavanones	Flavanones	-	-1.85545	-2.52685	0.671397	6994.83	4382.09	6968.02	6266.25	6014.5	5950.41	1909.22	1050.5	1810.16	6006.77	4172.09	2903.97	11903.4	8117.5	9051.21	12281.4	10482.6	12766.7	14622.3	15297.6	16677.1	15706.4	20891.1	19692.9
M471T268_pos	Sakuranin	Flavonoids	Flavanones	Flavanones	-	0.831545	-2.92191	3.75346	19046.1	22481.5	18544	20575.1	19905.3	19988.9	9626.06	2406.36	10093.6	12388.7	2982.76	12827.3	5026.86	5100.73	5054.29	4933.54	5253.55	2909.9	48814.5	55287.4	63828.3	64465.1	70348.1	78643.2
M465T420_neg	Plantagoside	Flavonoids	Flavanones	Flavanones	-	2.56136	1.2181	1.34326	14723.3	15390	15146.2	14806	12347.6	16707.5	17411.8	34966.4	29688.4	20653.6	35994.2	33613.9	5043.99	5070.94	4811.09	5119.82	5082.83	4066.43	12602.4	12118.5	12240	13001.5	11905.4	12207.4
M393T287_neg	Kazinol_A	Flavonoids	Flavans	Flavans	-	1.39054	4.61544	-3.2249	64393	44280.4	54908	63236.5	57484.4	52416.1	38611.9	125289	39024.2	33769.7	36275.9	27911.3	19481.2	17877.9	24604.5	15490.1	17378.6	19930.5	607.074	1670.91	2229.74	2765.57	1850.36	3151.04
M589T265_pos	Kolaflavanone	Flavonoids	Flavones and Flavonols	Biflavonoids and polyflavonoids	-	-0.344424	1.84209	-2.18651	5190.04	2677.13	4472.51	5782.87	3748.88	4063.94	4473.88	4419.11	3641.64	7646.97	7570.66	3688.03	7689.12	7531.3	6955.48	5648.09	5233.04	6860.96	1428.68	1013.62	1273.82	1301.19	1463.93	2288.03
M543T419_pos	Isochamaejasmin	Flavonoids	Flavones and Flavonols	Biflavonoids and polyflavonoids	-	4.16406	-0.167243	4.3313	202915	202915	202915	202915	202915	202915	333569	448217	218235	473946	402211	385208	10071.1	23692.5	25272.4	27786.2	29694.8	9627.32	532016	476613	331965	379644	393254	425842
M565T177_neg	Ginkgetin	Flavonoids	Flavones and Flavonols	Biflavonoids and polyflavonoids	-	3.42737	2.85806	0.569306	9809.63	14030	8946.99	9002.94	11412.4	10505.2	22543.7	21610.1	14152.8	14112.8	13000.8	14146.4	1764.93	1792.34	1715.44	1536.78	1296.07	1149.39	2299.22	4123.38	2182.63	1275.44	2843.07	1008.83
M181T28_2_neg	3,4-Dihydroxyphenylpropanoate	Flavonoids	Flavones and Flavonols	Flavone	ko00350(Tyrosine metabolism);ko00946(Degradation of flavonoids);ko01100(Metabolic pathways)	1.6601	4.86859	-3.20849	242016	251678	249727	251870	234029	254498	420842	571183	436404	599542	546698	543669	176096	159385	149404	169015	182348	150450	19785.7	17294.3	16346.9	19873.8	17539.3	15901
M331T178_pos	Tricin;Tricetin 3',5'-di-methyl ether; 3',5'-O-Dimethyltricetin	Flavonoids	Flavones and Flavonols	Flavones	-	7.92291	5.34297	2.57993	679682	779928	596501	714296	685808	683969	1.67669e+06	237448	1.2933e+06	1.33294e+06	1.58498e+06	1.12896e+06	3486.43	6121.64	4230.98	4036.73	5759.32	6257.44	14286.1	37368	8547.46	40108.5	20329.3	58091.8
M331T228_pos	Cirsiliol	Flavonoids	Flavones and Flavonols	Flavones	-	8.45284	4.66721	3.78563	480494	508668	500201	503767	480019	503300	999142	1.21487e+06	989419	1.13022e+06	1.13831e+06	1.18092e+06	2468.5	3987.78	2670.35	3261.06	3204.99	3394.17	9247.27	75364.2	11143.3	73425.8	44078	48584.1
M403T43_pos	Nobiletin	Flavonoids	Flavones and Flavonols	Flavones	-	-0.0707976	-2.06881	1.99801	5150.64	5150.64	5150.64	5150.64	5150.64	5150.64	3672.27	3481.97	3777.86	3406.96	4295.51	3189.8	6320.59	2932.59	2850.02	3886.57	2629.2	4303.11	13648.9	14252.9	16064.6	15792	16182.1	15621.6
M462T189_neg	Baicalin; Baicalein 7-O-glucuronide	Flavonoids	Flavones and Flavonols	Flavones	-	3.56372	0.455516	3.1082	32748.1	32748.1	32748.1	32748.1	32748.1	32748.1	30217	42181.1	35404.5	33446.7	28340.1	32967.9	1977	1163.29	4205.02	3211.78	3445.16	3127.9	22469.9	21431.9	25323.8	28499.3	21434.1	28555.7
M381T312_pos	Gardenin B;5-Hydroxy-2-(4-methoxyphenyl)-6,7,8-trimethoxy-4H-1-benzopyran-4-one;5-Hydroxy-4',6,7,8-tetramethoxyflavone;Demethyltangeretin	Flavonoids	Flavones and Flavonols	Flavones	-	-1.36813	-2.48238	1.11424	8275.16	11024.8	17538.4	10610.7	11406.8	11288.5	8102.99	8700.09	8396.73	3813.78	3436.46	8381	20013.9	21705	19502.6	22321.3	17160.6	4696.34	32820.5	21109.7	33100.9	37363.7	38725.5	65050.8
M449T429_2_pos	Orientin;Luteolin 8-C-glucoside	Flavonoids	Flavones and Flavonols	Flavones	-	2.56062	1.1728	1.38781	8191.57	9293.31	16734.4	9872.19	13489.9	9245.65	19048.5	32761.9	25710.8	18231.9	16992.6	29900.6	2585.46	5351.79	3078.61	3668.01	5064.24	4430.91	10939.6	11199.1	10685.8	11903.8	9205.83	9337.97
M392T144_pos	Scullcapflavone_II	Flavonoids	Flavones and Flavonols	Flavones	-	-1.2298	1.55255	-2.78234	11241.7	11858.2	7009.1	11007.1	10529.2	9680.07	8631.85	3083.34	12210.6	6823.32	10468.4	9231.16	16988.5	21884.7	25100.5	18053.5	22839.6	13452.5	2927.87	2952.58	2987.72	2877.47	2759.64	2693.07
M478T169_neg	Luteolin_7-O-glucuronide	Flavonoids	Flavones and Flavonols	Flavones	ko00944(Flavone and flavonol biosynthesis);	2.98938	2.38248	0.6069	44345.9	51563.8	42070.6	47151.9	45925.9	45887.1	45593.2	56677.1	30672.6	37294.3	36237.8	49671.1	5190.27	6831.99	3792.24	5559.57	5648.5	5232.27	7954.95	8913.3	6513.27	8473.54	8165.54	9102.98
M287T179_pos	Luteolin	Flavonoids	Flavones and Flavonols	Flavones	ko00944(Flavone and flavonol biosynthesis);ko01110(Biosynthesis of secondary metabolites);ko01100(Metabolic pathways);ko00941(Flavonoid biosynthesis);	3.35983	1.86628	1.49355	39611.5	39611.5	39611.5	39611.5	39611.5	39611.5	110584	62008.5	65249.8	54991.3	74856.4	62216.7	8711.78	7638.66	6844.68	8526.38	6132.06	4022.47	56436.7	3121.41	4717.96	45409.4	6830.1	1399.04
M299T69_neg	Chrysoeriol;5,7,4'-Trihydroxy-3'-methoxyflavone;3'-O-Methylluteolin	Flavonoids	Flavones and Flavonols	Flavones	ko00944(Flavone and flavonol biosynthesis);	2.50688	3.89587	-1.389	31638	28919.1	32885.2	30872.3	31013.4	31074	35089.1	65319.5	69233	74988.8	105675	81706.3	7928.46	9719.75	16773.2	15754.2	14666.7	11164.2	1945.19	4262.33	4804.42	7821.71	5512.49	4675.41
M447T178_neg	Luteolin 7-O-beta-D-glucoside;Luteolin 7-O-glucoside;7-O-beta-D-Glucosyl-5,7,3',4'-tetrahydroxyflavone;Cynaroside;Luteoloside	Flavonoids	Flavones and Flavonols	Flavones	ko00944(Flavone and flavonol biosynthesis);	3.19038	1.74053	1.44986	111004	111004	111004	111004	111004	111004	185066	146397	188177	151793	136687	126665	15886	26206.8	13783.6	15687.4	17212.2	13626.5	52500.7	40722.2	47574.6	48553.3	45704	44689.2
M433T188_pos	Isovitexin	Flavonoids	Flavones and Flavonols	Flavones	ko00944(Flavone and flavonol biosynthesis);	3.65108	3.54845	0.102635	7110.69	6863.23	6550.4	7471.1	6773.87	6888.69	19559.8	16068.1	17080.7	15495.9	15323.2	11700.1	2060.11	412.104	1044.81	1350.22	1357.67	1355.24	1135.03	1743.69	699.159	1808.28	1511.38	1241.53
M593T247_neg	Vitexin_2''-O-beta-D-glucoside	Flavonoids	Flavones and Flavonols	Flavones	ko00944(Flavone and flavonol biosynthesis);	3.48535	5.57318	-2.08783	35229.7	41707.6	35632.2	36355.6	36775.5	37750.3	72996.4	58083.1	60622.5	55531.7	60542.7	55444	4711.61	5608.61	5636.52	6201.32	5459.2	4814.87	1343.52	1586.37	991.964	1356.93	1244.62	1105.74
M653T247_neg	Scolymoside	Flavonoids	Flavones and Flavonols	Flavones	ko00944(Flavone and flavonol biosynthesis);	4.23948	4.72389	-0.484415	9760.87	7397.96	7984.92	6206.89	9324.46	8038.63	13003.9	13476.9	14651	15909.3	14704.9	13471.2	693.741	847.694	900.95	790.124	739.411	539.551	404.397	704.72	297.854	781.193	497.85	538.729
M608T461_neg	Isoswertisin_2''-rhamnoside	Flavonoids	Flavones and Flavonols	Flavones	ko00944(Flavone and flavonol biosynthesis);	-0.636146	-2.6463	2.01015	2318.63	2789.97	2212.25	2247.98	2465.41	2422.89	2422.22	1859.83	1797.72	1679.57	2318.61	2124.9	2095.89	2521.96	3318.78	3569.29	3200.63	4258.81	10342	12039.5	11375.1	13556.6	15278.2	13805.6
M491T221_neg	Apigenin 7-glucoside	Flavonoids	Flavones and Flavonols	Flavones	ko00944(Flavone and flavonol biosynthesis);	4.89163	4.06603	0.825602	16565.8	26413.7	21093	17810.3	21634.5	20417.3	31484.9	34893.7	28522.5	36892.7	31918.5	33158.4	876.202	1370.66	983.385	1237.28	1037.65	1126.98	915.356	2857.01	1353.1	2594.31	1970.97	2063.25
M303T586_pos	Tricetin	Flavonoids	Flavones and Flavonols	Flavones	ko00941(Flavonoid biosynthesis);	2.2178	0.955781	1.26202	31540.2	31132	36272.2	32484.9	32804.1	32650.1	130079	153635	138089	50932.5	126478	70471.2	31369.9	30619.4	14158.4	30987.2	12488.1	24338.5	41331.6	35941.8	39334.1	70957.9	50473.4	107226
M550T177_neg	Luteolin_7-O-(6''-malonylglucoside)	Flavonoids	Flavones and Flavonols	Flavones	-	4.44495	3.6583	0.786646	5922.76	11388.7	5430.96	7064.96	6884.76	7346.28	7087.16	10247	11724.7	10341.2	12026	1260.01	355.227	467.649	350.285	473.439	401.805	370.581	483.221	1300.99	692.181	276.871	1020.36	399.272
M259T310_neg	Flavone;2-Phenyl-4-benzopyron;2-Phenyl-4-chromone	Flavonoids	Flavones and Flavonols	Flavones	-	1.08521	3.91832	-2.8331	61541.9	58990.6	60409.7	61364.6	64264.3	58393.5	112875	112968	107509	107312	107709	92814.3	56985.6	40083.6	54274.1	48141.5	46027.7	56693.6	7082.97	6463.04	8249.7	7887.98	7000.78	5724.16
M447T401_neg	Isoorientin;Homoorientin;Luteolin-6-C-glucoside	Flavonoids	Flavones and Flavonols	Flavones	-	3.87994	1.77353	2.10641	36365.6	37156.1	35879	36700.8	36459.6	36490.7	114666	114753	65565.9	108089	106938	126640	7435.14	7529.81	6695.37	8181.38	6837.98	6563.99	24122.7	20441.8	25263.3	64748.8	22949.1	28689.5
M463T430_1_pos	6-Methoxyluteolin_7-rhamnoside	Flavonoids	Flavones and Flavonols	Flavones	-	2.99659	1.9685	1.02808	9141.46	9141.46	9141.46	9141.46	9141.46	9141.46	29909.5	24654.4	11195.5	19393.7	23989.2	31233.8	1174.53	3677.85	2172.08	4587.53	3125.54	2851.05	4728.72	5124.9	5937.02	7386.07	6249.95	6441.94
M461T64_neg	Isoscoparine;Isoscoparin;C-Glucosyl-6 chrysoeriol;Chrysoeriol 6-C-glucoside	Flavonoids	Flavones and Flavonols	Flavones	-	2.47986	3.75792	-1.27806	68971.8	75571.4	60842.3	68658.2	75459.2	65261.6	88321.8	99194.5	87493.9	114991	106470	128612	16675.2	35398.9	483.67	14258.7	20850.8	24386.4	4102.12	7749.17	5143.16	15780.4	3679.68	9750.64
M371T399_neg	Tangeretin	Flavonoids	Flavones and Flavonols	Flavones	-	1.07102	-1.68948	2.7605	17283.3	8407.05	15183.1	10363.5	13592	12946.2	9890.39	19299.6	11806.8	12189.5	10524.5	24625	9158.22	5308.16	9269.6	4359.21	8237.55	5713.67	50856.6	53577.8	49570.5	49603	41476.9	39835
M534T43_neg	Apigenin_7-(6''-malonylglucoside)	Flavonoids	Flavones and Flavonols	Flavones	-	2.82069	4.29362	-1.47294	16886.8	16505.3	19898.5	16760.1	19957.5	16479.6	26601.8	47900.6	24361.1	38949.6	37803.9	33939.6	4014.78	5348.2	4047.08	6946.2	4045.78	5259.26	1271.59	1483.02	1208.47	2645.81	1979.17	2097.37
M487T353_pos	Flavonol_3-O-(6-O-malonyl-beta-D-glucoside)	Flavonoids	Flavones and Flavonols	Flavones and flavonols	-	1.73926	3.68764	-1.94838	2504.51	2206.83	2895.31	2277.29	2549.15	2488.75	7027.76	5840.91	7400.74	6207.3	6046.96	6647.69	1375.51	2083.53	2209.48	1713.34	1879.77	2471.14	544.126	452.322	451.973	562.201	468.696	560.714
M347T133_pos	Eupatolitin	Flavonoids	Flavones and Flavonols	Flavones and Flavonols	-	4.20123	5.13711	-0.935882	340744	340744	340744	340744	340744	340744	430866	688253	197543	281734	510806	273087	58198	23277.2	7526.74	11165.3	9091.74	20249.3	8612.88	21923.5	4156.48	9440.33	8931.28	14632.5
M259T498_neg	Fisetin_8-C-glucoside	Flavonoids	Flavones and Flavonols	Flavones and Flavonols	-	-1.59916	-7.43364	5.83449	27826.4	28119.3	21445.1	26405.8	25793.4	25937.3	3676.18	4711.36	4141.49	3508.75	3573.5	3857.12	11430.9	12189.7	11335.2	14241.7	10900.8	11003	597117	606049	733205	709256	728056	683582
M471T180_pos	Plantaginin;Scutellarein 7beta-D-glucopyranoside	Flavonoids	Flavones and Flavonols	Flavones and Flavonols	-	2.83095	2.47697	0.353982	14466.7	13163.8	12287.7	17670	8957.94	16295.2	27538.3	18412.6	26735	18940.9	19418.7	18321.3	2772.57	1290.98	1875.72	3601.34	4281.37	4359.23	8856.46	1399.86	8228.74	1850.69	1956.85	944.499
M463T188_pos	Homoplantaginin	Flavonoids	Flavones and Flavonols	Flavones and Flavonols	-	7.64945	4.34677	3.30268	147165	140840	130629	169671	134558	142140	398267	380780	347833	391435	350032	290949	2373.32	1984.25	1886.36	1624.4	1477.6	1408.76	4386.09	31553.6	5357.48	28957.5	19082.5	16784.6
M389T304_neg	6-Geranylchrysin	Flavonoids	Flavones and Flavonols	Flavones and Flavonols	-	1.39816	2.52641	-1.12825	33059.8	35281.7	32388.7	33501.5	33517.3	33622.7	61310.5	42155	73896.7	46732.9	58745.5	56824.6	26192.6	21552.3	18742.3	20131.2	21731.5	20523.4	10168.5	7025.54	7463.99	12076.3	10397.3	11824.3
M391T259_pos	6,8-Di-DMA-chrysin	Flavonoids	Flavones and Flavonols	Flavones and Flavonols	-	0.0491794	3.49188	-3.4427	13651.8	13651.8	13651.8	13651.8	13651.8	13651.8	37848.9	19610.4	18967.8	22700.6	13938.9	28376.7	22563.3	25631.8	19042.6	22379.6	20335.9	26749.9	877.725	2028.9	2195.43	2947.38	1742.3	2780.79
M175T308_neg	8-(1,1-Dimethylallyl)-3-methylgalangin	Flavonoids	Flavones and Flavonols	Flavones and Flavonols	-	-0.485113	2.31901	-2.80412	18861	18861	18861	18861	18861	18861	33119.6	33388	21386.9	15003.3	11778.6	18865.8	63750.8	43913	25485.7	17536.9	15718.3	20514	4699.34	7853.73	5420.5	3349.35	2462.51	2977.09
M419T429_pos	Kaempferol_3-O-beta-D-xyloside	Flavonoids	Flavones and Flavonols	Flavones and Flavonols	-	2.08164	1.09729	0.984347	2375.59	2234.85	2532.57	2347.26	2368.76	2373.21	3447.89	5148.19	8686.17	9351.96	8133.94	5407.39	1238.96	1354.15	1744.95	1797.01	1779.24	1577	1668.59	3242.77	3766.77	3406.51	4002.57	2690.57
M807T463_pos	6''-Feruloylspinosin	Flavonoids	Flavones and Flavonols	Flavones and Flavonols	-	0.261103	-3.35802	3.61912	7565.59	7565.59	7565.59	7565.59	7565.59	7565.59	4772.97	3197.62	3919.87	4058.73	3996.03	4918.98	1095.5	1943.63	4425.55	3440.87	4476.05	5366.33	61633.3	46622.2	38184.6	36057.3	36249.7	36193.5
M715T453_pos	Icariin	Flavonoids	Flavones and Flavonols	Flavones and Flavonols	-	0.0640139	-4.40028	4.46429	2522.77	2236.42	1613.58	2927.44	2006.19	2172.94	1371.61	440.133	619.202	736.888	579.941	608.419	405.753	592.056	1115.69	699.858	643.885	709.883	24218.5	16797.7	16576.2	10980	10722.6	12691.4
M617T250_pos	Isovitexin_2''-O-beta-D-glucoside	Flavonoids	Flavones and Flavonols	Flavones and Flavonols_PK1211 Flavones and Flavonols	ko00944(Flavone and flavonol biosynthesis);	2.3693	1.64763	0.72167	8922.9	11078.7	9723.21	9540.35	6957.28	11768.8	19593.3	21890.4	25953	20983.9	26856.8	24608	3954.51	2361.58	2640.11	6474.59	5106.27	6536.29	4787.94	6588.08	6843.48	8515.92	8201.26	9709.72
M649T302_pos	Quercetin_3-O-rhamnoside_7-O-glucoside	Flavonoids	Flavones and Flavonols	Flavones and Flavonols_PK1211 Flavones and Flavonols	ko00944(Flavone and flavonol biosynthesis);	3.29854	4.9579	-1.65936	2275.88	2555.06	2911.24	2190.86	4044.64	2006.66	14769.2	11700.2	11196.3	25395.7	9586.27	7195.64	1074.53	1056.9	1801.3	1843.87	652.396	1685.85	323.131	542.269	435.012	426.024	364.294	478.264
M317T428_pos	Pinoquercetin; 6-C-Methylquercetin	Flavonoids	Flavones and Flavonols	Flavonols	-	2.55908	1.13433	1.42475	70077.2	59626.9	69122.3	68320.4	65678.9	66308.7	94280.7	133096	86634.1	114926	92979.6	104632	17932.1	23306.3	17193.2	20196.9	13947.9	13738.6	48057.1	54612.4	34048.7	60374.3	50287.3	38041.1
M369T359_pos	Velloquercetin	Flavonoids	Flavones and Flavonols	Flavonols	-	1.34617	2.42363	-1.07746	4098.44	4056.95	3721.09	4090.24	3958.51	3975.23	9796.36	11003.8	7704.47	8685.31	9771.94	11194.3	2207.07	4140.34	3758.39	3448.92	4196.04	5124.06	1840.55	2357.38	1575.19	1783.39	1624.99	1658.02
M317T159_neg	Quercetagetin;6-Hydroxyquercetin	Flavonoids	Flavones and Flavonols	Flavonols	-	3.50083	2.52103	0.979795	12402.9	12402.9	12402.9	12402.9	12402.9	12402.9	24253.5	22578	30568.7	16483.4	45265	26290.6	1694.21	2902.05	3151.73	3693.8	2568.24	604.474	3702.18	4299.42	5812.56	7452.68	4944.2	2611.46
M317T254_pos	Isorhamnetin;3-Methylquercetin;Quercetin 3'-methyl ether	Flavonoids	Flavones and Flavonols	Flavonols	-	4.52076	5.03501	-0.514249	41600.5	41600.5	41600.5	41600.5	41600.5	41600.5	34298.4	131147	100819	115451	57166.8	159606	5004.19	7313.34	1097.17	7193.49	2726.64	2736.96	2221.09	3381.79	2312.92	2877.73	2727.48	4733.34
M327T177_neg	Tomentin; 3',4',5,6-Tetrahydroxy-3,7-dimethoxyflavone	Flavonoids	Flavones and Flavonols	Flavonols	-	5.32067	1.69524	3.62543	320785	332094	209934	326508	376141	248559	337315	265258	399732	289647	337495	290604	8778.7	8277.6	8029.78	7887.15	7876.91	7192.86	27553.6	179864	39797.3	139934	68442.2	137325
M348T42_neg	Patuletin	Flavonoids	Flavones and Flavonols	Flavonols	-	3.66647	0.745523	2.92095	15085.5	16071	14157.2	15560.7	15128.9	15111.2	25579.5	29488.6	27645.1	28397.1	29499	33294.5	1414.53	3175.61	1673.96	2667.25	2311.89	2452.71	6542.39	26702.7	8593.66	25786.6	17971	18128.9
M317T586_pos	Rhamnetin;Quercetin 7-methyl ether	Flavonoids	Flavones and Flavonols	Flavonols	-	2.06036	1.19188	0.868485	58123.9	59758.8	56740.3	58795.1	58194.7	58270.7	254161	181879	114457	126147	126512	126762	89513.5	18505.9	37601.8	27454.5	31834.3	18043	109861	110061	61815.7	68662.1	54633.6	2021.56
M480T224_neg	Myricitrin;Myricetin 3-O-rhamnoside	Flavonoids	Flavones and Flavonols	Flavonols	-	6.40715	3.90057	2.50659	22101.4	24130.3	26822.8	23490.3	24652	23790	32446.4	33104.5	31959.4	34290.7	33424.9	37685.1	354.791	453.926	378.227	419.989	344.135	439.826	577.104	3256.07	633.546	3972.24	2747.93	2399.95
M347T165_pos	Axillarin; Quercetagetin 3,6-dimethyl ether	Flavonoids	Flavones and Flavonols	Flavonols	-	5.15885	4.99238	0.166476	640609	784633	593235	656736	579846	723111	1.97918e+06	2.10573e+06	1.49357e+06	1.86414e+06	1.24158e+06	1.30406e+06	46885.9	42467.5	30171.7	94719.7	35765.2	29579	30823.9	86211.8	35058.7	71888.4	44293.9	45509.8
M551T228_pos	Quercetin_3-O-(6-O-malonyl-beta-D-glucoside)	Flavonoids	Flavones and Flavonols	Flavonols	ko00944(Flavone and flavonol biosynthesis);	5.3303	4.26867	1.06163	9901.45	10737.1	10170.1	11450.2	10024.4	10331.4	16118	16896.3	15413.3	19671	13272.6	32464.6	373.403	505.16	615.107	426.309	434.483	474.971	438.096	1294.57	383.073	1714.39	1216.74	858.968
M287T255_pos	Kaempferol	Flavonoids	Flavones and Flavonols	Flavonols	ko00944(Flavone and flavonol biosynthesis);ko01110(Biosynthesis of secondary metabolites);ko01100(Metabolic pathways);ko00941(Flavonoid biosynthesis);	2.2302	3.94924	-1.71903	19467.8	19467.8	19467.8	19467.8	19467.8	19467.8	18288.1	52631.8	34272.1	63736.1	28332	30366.9	6765.8	3803.63	3824.43	12818.6	9636.84	11664.6	1996.5	2862.86	3685.92	3271.57	2549.2	370.127
M449T473_pos	Kaempferol 3-O-glucoside; Kaempferol 3-O-beta-D-glucoside; Astragalin	Flavonoids	Flavones and Flavonols	Flavonols	ko01110(Biosynthesis of secondary metabolites);ko00944(Flavone and flavonol biosynthesis);	2.88329	2.71937	0.163921	17694.9	16097.7	22487.4	12722.8	20484.5	17591.9	125347	107933	113192	141154	35935.2	59758	34443.6	13997.2	14641.8	7488.53	5057.93	3429.45	13784.1	27087	25859.6	2263.37	9809.25	9768.23
M299T176_neg	Kaempferide;Kempferide;Kaempferol 4'-methyl ether	Flavonoids	Flavones and Flavonols	Flavonols	ko00944(Flavone and flavonol biosynthesis);	3.34229	4.22957	-0.887282	94364.4	101798	71275.1	98264.8	89486.9	88823	91189.5	94397.8	149831	162175	107635	188817	10923	12223.3	12343.6	13128.9	13368.6	16304.3	2486.14	7903.58	1964.25	14923.6	6875.43	8173.93
M362T188_pos	3,7,4'-Tri-O-methylquercetin	Flavonoids	Flavones and Flavonols	Flavonols	ko00944(Flavone and flavonol biosynthesis);	1.15374	-2.90676	4.0605	6209.03	6822.76	6365.52	6847.14	6305.36	6518.09	7863.9	4470.16	4603.12	3348.4	3015.32	2766.64	2991.03	2040.1	2143.8	1681.72	1472.32	1387.34	48650.6	39016.1	19681.9	25906.1	37031.1	25203.6
M317T513_pos	3-O-Methylquercetin	Flavonoids	Flavones and Flavonols	Flavonols	ko00944(Flavone and flavonol biosynthesis);	2.11389	1.63701	0.476878	85887.3	61901	103177	89628.7	77318	82992.8	392404	408821	262719	234704	210267	241359	68978.1	147978	51974.2	60498.2	34960.7	39965.9	155041	61159.6	90558.6	97469.9	64738.8	93784.3
M333T308_pos	Laricitrin;3'-O-Methylmyricetin	Flavonoids	Flavones and Flavonols	Flavonols	ko00944(Flavone and flavonol biosynthesis);	3.19654	3.278	-0.0814674	21787.4	21787.4	21787.4	21787.4	21787.4	21787.4	49416.3	101367	80036.5	84297	99169.2	108363	7959.68	11821.6	2904.42	12997	3218.65	18109.5	6630.12	8092.76	9206.34	7828.87	9513.69	12608.9
M447T301_neg	Quercitrin;Quercetin 3-L-rhamnoside;Quercetin 3-O-alpha-L-rhamnopyranoside	Flavonoids	Flavones and Flavonols	Flavonols	ko00944(Flavone and flavonol biosynthesis);	3.88755	3.50134	0.386211	101746	101746	101746	101746	101746	101746	213750	221900	226721	142578	76198.3	273187	11722.1	14849.7	3415.31	4723.56	17005.1	26278.2	19822.9	16570.3	15583.1	6457.51	15462.9	28038.1
M447T46_2_neg	Kaempferol-3-O-galactoside	Flavonoids	Flavones and Flavonols	Flavonols	ko00944(Flavone and flavonol biosynthesis);	3.21567	2.50283	0.712842	55543.8	60130.7	54276.3	62354.4	52738.1	58597.2	93056	119309	90264.8	108800	93601.2	101860	6722.01	14199.8	7937.52	12825.6	12888.5	10754	16626.6	14653.3	18857.3	17985.2	18435.9	20515.2
M329T225_neg	3,7-Di-O-methylquercetin	Flavonoids	Flavones and Flavonols	Flavonols	ko00944(Flavone and flavonol biosynthesis);	5.71722	3.93772	1.7795	324043	445369	325975	351903	352864	365448	475276	526379	452531	604634	563205	571826	10065.4	6668.14	10537	10023.3	11341.4	12074.7	8106.76	54811.9	8384.89	61082.5	36484.3	39551.1
M347T108_pos	Syringetin	Flavonoids	Flavones and Flavonols	Flavonols	ko00944(Flavone and flavonol biosynthesis);	4.0135	5.40328	-1.38978	283405	283405	283405	283405	283405	283405	242610	430505	550057	931687	460414	1.03294e+06	28949.2	56320.9	18336.5	29102.1	65672.5	27508.1	5894.54	17495.2	5747.79	17858.4	11727.1	27481.3
M811T429_pos	Kaempferol_3-sophorotrioside	Flavonoids	Flavones and Flavonols	Flavonols	ko00944(Flavone and flavonol biosynthesis);	3.38914	1.53642	1.85273	4674.86	4674.86	4674.86	4674.86	4674.86	4674.86	7023.79	8002.55	10218	15086.5	8424.99	11535.7	956.938	963.483	930.134	1533.24	548.536	822.362	3127.56	3452.09	1708.37	4786.4	4278.1	3432.46
M303T474_pos	Quercetin;3,3',4,5,7-Pentahydroxyflavone;3,5,7,3',4'-Pentahydroxyflavone	Flavonoids	Flavones and Flavonols	Flavonols	ko00944(Flavone and flavonol biosynthesis);ko01110(Biosynthesis of secondary metabolites);ko00941(Flavonoid biosynthesis);ko01100(Metabolic pathways);	2.40764	2.82379	-0.416142	39323.6	36705.3	40129.7	38934.5	38525.1	38715.4	90029.9	142429	140293	82168.2	170218	86628.9	23635.8	27620.7	5181.93	24291.5	24955.8	28456.4	20338.5	13933.2	15231.5	14963.4	16612.6	19450.4
M463T452_neg	Quercetin_3-O-glucoside	Flavonoids	Flavones and Flavonols	Flavonols	ko00944(Flavone and flavonol biosynthesis);ko01100(Metabolic pathways);ko01110(Biosynthesis of secondary metabolites);	2.94015	0.203046	2.73711	86134.9	115204	86160.9	136916	88483.6	97179.7	133370	169232	168313	355571	180157	180986	22457.7	29090.3	18364	23104.8	22212.6	39511.9	189888	197282	234109	135846	145731	128855
M319T428_pos	Myricetin	Flavonoids	Flavones and Flavonols	Flavonols	ko00941(Flavonoid biosynthesis);ko00944(Flavone and flavonol biosynthesis);	2.35601	0.982387	1.37362	10253.6	9677.03	7368.51	8386	9596.64	8942	9825.06	15947.4	10476.5	22494.2	17076.4	23480.2	1569.84	3117.04	2676.3	3468.27	5523.09	3041.71	6880.58	9618.71	7481.08	8031.98	7324.31	10923
M649T469_pos	Rutin	Flavonoids	Flavones and Flavonols	Flavonols	ko01100(Metabolic pathways);ko01110(Biosynthesis of secondary metabolites);ko00944(Flavone and flavonol biosynthesis);	2.70967	2.77855	-0.0688844	7368.59	6977.68	7656.57	7301.38	7303.45	7323.78	21926.2	40453.6	12906.5	23536.5	38666.4	26550.2	3670.15	5171.38	3054.74	2941.68	4817.72	5420.21	3777.41	3862.74	4004.17	4025.67	4162.14	4074.59
M287T429_1_pos	Fisetin	Flavonoids	Flavones and Flavonols	Flavonols	-	2.39772	0.75018	1.64754	18909.4	16070.3	26335.5	16826.1	21393.7	18995.1	27771	34745.9	28663.6	32807.9	26186.6	26576.2	2913.93	5015.52	6985.32	7180.82	7335.26	4110.18	17805.4	19901.2	14339.2	20743.8	19510.4	12783.8
M465T429_pos	Gossypetin_8-rhamnoside	Flavonoids	Flavones and Flavonols	Flavonols	-	2.27717	1.24428	1.03288	7255.05	7180.09	11774	7912.2	8213.95	8382.78	10751.5	17806.1	9811.66	18869.9	12564.9	19358.6	851.508	3113.8	3303.45	3614.21	4134.57	3376.93	5819.28	5748.19	6758.11	6235.71	6467.25	6608.59
M463T251_neg	Hyperin;Quercetin 3-galactoside	Flavonoids	Flavones and Flavonols	Flavonols	-	3.55899	2.67355	0.88543	37524.9	65727.3	30005	42979.8	39616.3	43901.1	77581.4	122760	159592	243634	193582	179785	13109.2	18615.2	14788.7	11692.1	13135.5	11549.6	23336.1	27714.9	27417	28800	24520.6	21335.9
M523T304_neg	Quercimeritrin;Quercetin 7-O-beta-D-glucoside	Flavonoids	Flavones and Flavonols	Flavonols	-	3.71187	4.75174	-1.03987	7047.79	5716.77	7599.33	6579.16	6657.18	6753.7	11378.7	30028.1	21540.1	28566	23708	13891.4	2228.04	630.674	2154.78	1881.65	1568.3	1389.91	598.777	612.084	925.536	877.457	976.357	802.171
M779T430_pos	Robinin	Flavonoids	Flavones and Flavonols	Flavonols	-	3.05678	1.45107	1.60571	1885.78	1725.22	1969.47	1874.75	1841.75	1859.3	3842.94	3685.17	2596.92	3197.4	2903.45	5187.34	215.8	458.113	435.268	486.9	542.156	435.123	1277.14	1291.61	1378.94	1058.24	1317.51	1508.45
M391T305_neg	Hispaglabridin_A	Flavonoids	Isoflavanes	Isoflavanes	-	2.79502	4.61092	-1.8159	28793.2	19839.5	19820.6	23611.2	26005.6	21319.1	40190.2	42888.6	40749.7	41143.3	41088.6	42134.1	6972.25	8121.08	8630.46	4611.97	980.261	6444.73	1865.39	1775.07	1219.24	2107.65	1485.2	1704.45
M325T167_neg	7,2'-Dihydroxy-4'-methoxy-isoflavanol	Flavonoids	Isoflavanes	Isoflavanes	ko01110(Biosynthesis of secondary metabolites);ko00943(Isoflavonoid biosynthesis);	3.50134	2.01721	1.48413	50636.9	50636.9	50636.9	50636.9	50636.9	50636.9	87148.6	90636.2	81483.7	75187.7	68244.4	65143.4	1561.36	33248.3	1364.49	1891.3	2187.02	1061.2	31743.1	25646.4	26103.5	8660.55	8686.07	14734.7
M271T42_neg	(-)-Vestitol	Flavonoids	Isoflavanes	Isoflavanes	ko00943(Isoflavonoid biosynthesis);	-1.19037	-2.09529	0.904923	35136.1	35136.1	35136.1	35136.1	35136.1	35136.1	21743.9	24469.4	27238	23051.8	18973.4	26650.7	63768.3	56364.9	57926.9	50643.7	46534	49112.2	95609	100091	105405	97408	102760	106055
M301T227_pos	(+)-Sophorol	Flavonoids	Isoflavanones	Isoflavanones	ko00943(Isoflavonoid biosynthesis);ko01110(Biosynthesis of secondary metabolites);	5.20815	4.17189	1.03626	26634.3	26634.3	26634.3	26634.3	26634.3	26634.3	52831.7	58708	53410.1	57590.7	55704.3	59663.2	1398.4	1475.91	1593.39	1514.94	1652.28	1505.96	1771.41	4282.09	1899.59	4346.29	3381.44	3066.23
M533T369_neg	Dalpanin	Flavonoids	Isoflavanones	Isoflavanones	-	-1.14088	-2.13347	0.992595	14515.2	14421.7	9615.86	13173.7	13310.2	12621.9	2854.32	2953.85	2319.82	1707.81	2442.38	2866.79	6851.09	5951.87	7145.36	4088.42	4198.35	5161.93	8484.17	9136.08	12782.9	9330.17	10843.4	15875.3
M287T585_pos	2'-Hydroxygenistein	Flavonoids	Isoflavones	Isoflavones	ko00943(Isoflavonoid biosynthesis);	2.1829	0.728994	1.45391	14561.2	15531.7	21721	15838.6	26189.3	13256.6	53114.2	22031.1	29695.2	21663.1	35827.7	44895.2	22528	3916.02	4193.74	2159.33	6876.94	5963.9	28904.5	24299.3	20896.2	16410.3	13892.3	20622.2
M149T225_neg	Pratensein	Flavonoids	Isoflavones	Isoflavones	ko00943(Isoflavonoid biosynthesis);	3.43723	3.18126	0.255969	17815.2	16909	17692.3	17197.4	20275.3	16187.8	25312	22629.4	20831.4	26898.2	24215	24769.5	1797.57	2136.59	1887.95	1939.58	2851.92	2740.81	1738.25	3350.64	1624.38	4209.77	2577.66	2446.32
M299T46_neg	2'-Hydroxybiochanin_A	Flavonoids	Isoflavones	Isoflavones	ko00943(Isoflavonoid biosynthesis);	2.64838	3.40467	-0.756287	31426	34738.5	31371.8	31472.4	32758	32368.1	44786.2	79322	43506.2	76099.7	57602.8	49660.7	2398.27	12544.5	14531.9	1837.03	12650.4	12018.5	4942.84	6161.59	7353.84	5015.53	5869.37	3798.34
M450T198_pos	Genistin;Genistein 7-O-beta-D-glucoside	Flavonoids	Isoflavones	Isoflavones	ko00943(Isoflavonoid biosynthesis);	-1.31542	-4.9794	3.66398	9838.39	9122.31	7349.14	10103.7	8661.26	8859	2488.1	2224.23	2313.55	1912.69	2627.53	1576.88	6591.92	6174.92	5135.4	5097.62	5181.98	4527.83	86357.3	67057.4	70698.6	61312.6	64994.8	64192.3
M293T346_neg	Formononetin_7-O-glucoside-6''-O-malonate	Flavonoids	Isoflavones	Isoflavones	ko00943(Isoflavonoid biosynthesis);	-1.04482	1.37609	-2.42091	4408.4	7156.56	4049.18	4946.19	4926.21	5127.45	9644.72	5998.08	9293.22	12272	9619.19	2819.08	19236.4	9959.86	21103.6	18097.4	15699.8	18328.6	4083.78	2959.91	3232.97	2729.98	2855.89	3264.31
M533T207_pos	Malonylglycitin	Flavonoids	Isoflavones	Isoflavones	ko00943(Isoflavonoid biosynthesis);	6.83721	4.56815	2.26906	78789.2	71033.3	56704.2	77186.5	68749.2	69195.8	177157	165443	148871	132762	138788	112724	2505.58	1486.9	967.949	999.965	1079.99	618.641	2967.25	11390.6	1916.21	8764.53	5353.79	6524.82
M533T228_pos	Biochanin_A_7-O-(6-O-malonyl-beta-D-glucoside)	Flavonoids	Isoflavones	Isoflavones	ko00943(Isoflavonoid biosynthesis);	9.30018	4.37208	4.9281	362493	349872	325392	366486	344371	348076	848118	845662	782344	681158	652758	673011	1090.36	1427.56	1029.77	1251.73	1111.52	1200.24	3781.1	66119.6	4493.67	73383.5	42962.1	25754.4
M534T176_neg	Malonylgenistin	Flavonoids	Isoflavones	Isoflavones	ko00943(Isoflavonoid biosynthesis);	5.18419	3.7966	1.38759	17250.7	17250.7	17250.7	17250.7	17250.7	17250.7	36619.4	28978.5	22339.3	29264.9	35205.2	44718.9	820.19	902.085	861.661	998.058	966.314	873.541	2201.11	1617.46	2000.9	1404.96	2737.49	4223.9
M446T391_neg	Ononin;Formononetin 7-O-glucoside	Flavonoids	Isoflavones	Isoflavones	ko00943(Isoflavonoid biosynthesis);	-2.00648	-4.77569	2.76921	7172.67	4497.53	7686.79	6280.28	6017.36	6393.7	1903.44	2021.56	2136.83	6224.94	2194.54	3163.74	8241.07	9732.77	17400	16895	12319.7	6309.3	64930.1	79804.6	93295.7	104711	89618.9	50976.5
M314T179_neg	2',7-Dihydroxy-4',5'-methylenedioxyisoflavone	Flavonoids	Isoflavones	Isoflavones	ko00943(Isoflavonoid biosynthesis);ko01110(Biosynthesis of secondary metabolites);	-1.00926	1.12404	-2.1333	40186	79937.7	70511.7	71428.4	55174.2	61405.5	97587.3	58175.7	71071.5	43437.2	101240	39908	138963	123336	148880	126609	143037	147314	61619	22338.4	65316.3	8695.98	20753.2	10039.6
M485T199_pos	Tectoridin	Flavonoids	Isoflavones	Isoflavones	-	5.06492	0.825192	4.23972	39623.3	39623.3	39623.3	39623.3	39623.3	39623.3	127515	175287	228848	212128	221109	185013	5413.04	6948.4	4878.63	6321.47	4977.48	5814.32	70059.8	93867	107552	145419	131786	100328
M521T176_neg	Iridin	Flavonoids	Isoflavones	Isoflavones	-	6.92869	4.27611	2.65258	178621	178621	178621	178621	178621	178621	239429	277209	325338	296494	259242	244941	1858.79	2174.02	2148.59	1991.27	3042.23	2268.54	3671.09	22422.6	2899.95	21104.7	17365.4	17319.1
M439T64_pos	Calophyllolide	Flavonoids	Other flavonoids	Neoflavonoids	-	1.27576	2.21204	-0.936279	6288.56	4009.71	5428.67	5052.14	5247.98	5161.18	8019.49	15093	11505.5	12151	8921.99	7848.01	6037.27	4103.22	5976.32	4580.08	2973.2	2571.91	2310.67	2434.29	2901.47	2213.84	2038.75	1814.51
M405T380_neg	Mammeisin	Flavonoids	Other flavonoids	Neoflavonoids	-	0.0984206	3.40273	-3.30431	14807.4	15946.9	14821.1	15147.5	15892.9	14827.9	24024.3	20498.8	25107.9	26785.8	25198.5	24881.8	18756.8	21392.9	32256.4	20528.4	21632.8	22269	1717.55	3426.86	2237.08	2331.2	1727.14	2411.95
M197T257_neg	Syringic acid; Syringate; 4-Hydroxy-3,5-dimethoxybenzoate; Gallic acid 3,5-dimethyl ether	Flavonoids	Other flavonoids	others	ko00627(Aminobenzoate degradation);ko01120(Microbial metabolism in diverse environments);	1.26638	2.5081	-1.24172	13662	13554.3	10498.5	13559	14011.5	11937	21019.4	27682.7	21733	22856.2	32405.7	21257.2	10256.2	8397.56	8271	9512.89	10500.9	14150.5	3767.82	4050.69	3973.11	4833.13	4841.75	4366.16
M169T36_pos	Vanillate;Vanillic acid;4-Hydroxy-3-methoxybenzoate;4-Hydroxy-3-methoxybenzoic acid	Flavonoids	Other flavonoids	others	ko00627(Aminobenzoate degradation);ko01120(Microbial metabolism in diverse environments);	0.107469	2.3357	-2.22823	16363.5	16363.5	16363.5	16363.5	16363.5	16363.5	26783.1	29858.1	35401.2	24821.5	30054.5	33927	30327.8	30131.2	34488	29073	22653.9	21189.5	7866.41	6769.4	7034.65	4426.14	3667.86	6061.09
M171T222_neg	Arbutin	Flavonoids	Other flavonoids	Others	ko00010(Glycolysis / Gluconeogenesis);	-1.102	-2.16006	1.05806	3785.49	3785.49	3785.49	3785.49	3785.49	3785.49	2709.97	3591.36	2628.55	2801.72	2779.31	789.938	3192.56	4869.16	5689.59	8111.61	9541.17	1439.38	12639.5	11341.7	8855.7	8671.58	12281.5	14594.6
M487T184_pos	Lonchocarpenin	Flavonoids	other isoflavonoids	3-Arylcoumarins	-	2.57458	1.02301	1.55157	20356.8	21730.2	17935.1	28865.7	18733.2	20519.1	210465	77798	196117	141162	179976	112342	24091.3	31841.2	25242.1	30488.1	21719.1	20699.6	89302.5	81888.8	74112.9	71260.3	65123.4	69979.8
M403T293_neg	Osajin	Flavonoids	other isoflavonoids	Isoflavonoids	-	-0.781796	3.69677	-4.47857	126133	126133	126133	126133	126133	126133	128745	158216	138203	161530	166769	130142	252499	238508	295340	231475	249562	251771	12835.3	9426	9117.94	12609.4	10579.8	13574.1
M564T248_neg	Puerarin_xyloside	Flavonoids	other isoflavonoids	Isoflavonoids	-	3.87888	5.40959	-1.53072	4720.12	3019.89	3220.84	3279.65	3877.76	3538.6	7083.65	5583.1	6733.35	6294.27	4998.32	5146.76	290.986	399.296	467.548	369.961	516.71	391.641	133.351	271.771	78.0014	153.97	133.152	72.9165
M419T320_pos	Cyclomorusin	Flavonoids	Others	Others	-	0.358161	2.80943	-2.45127	10580.1	9734.49	7540.69	11513	8936.66	9473.32	39261.4	24573	16786.5	13575	11741.5	16334.9	17357.2	16773	15268.5	12156.6	15537.3	18299.2	5964.68	2980.68	2299.84	1575.04	1454.03	3168.1
M285T40_neg	Methylarbutin	Flavonoids	Others	Others	-	0.562229	4.10746	-3.54523	41322.5	41322.5	41322.5	41322.5	41322.5	41322.5	76372	89805	82811.4	94773.1	86565.1	95052.5	63089.8	56589.7	63909.3	56028.8	60823.6	55374.2	6764.23	6734.63	7015.59	6791.07	1537.2	1636.6
M633T429_pos	Gallocatechin-(4alpha->8)-epigallocatechin	Flavonoids	Proanthocyanidins	Proanthocyanidins	-	2.6995	0.540049	2.15945	6862.56	6862.56	6862.56	6862.56	6862.56	6862.56	10728.2	9248.68	5451.33	11430.4	9067.9	10529.4	1124.92	1180.68	1304.3	1355.44	1807.36	1918.48	5838.53	7961.12	3521.15	7336.08	7159.88	7010.64
M452T193_neg	ent-Fisetinidol-(4beta->8)-catechin-(6->4beta)-ent-fisetinidol	Flavonoids	Proanthocyanidins	Proanthocyanidins	-	2.22838	1.89356	0.334816	17405.5	17405.5	17405.5	17405.5	17405.5	17405.5	20454.6	23947.2	26915.3	22578.4	16307.1	16987.8	4294.11	5296.36	5090.25	4471.71	4143.84	3845.94	5409.86	6174.75	4321.52	6636.64	4015.51	7673.93
M545T254_neg	Afzelechin-(4alpha->8)-afzelechin	Flavonoids	Proanthocyanidins	Proanthocyanidins	-	-2.92366	1.49728	-4.42094	11217.5	13523.9	10751.5	12865.9	11524.7	11899.2	5534.36	6835.09	3891.21	6127.59	3649.5	4074.89	53201.3	30855.5	38506	29792.9	42040.2	34089.2	2312.03	1490.69	2472.71	964.67	2323.02	1103.4
M585T519_pos	Gambiriin_C	Flavonoids	Proanthocyanidins	Proanthocyanidins	-	1.46391	-1.55297	3.01688	1215.14	954.569	574.914	926.819	908.806	899.536	998.288	1226.5	968.963	1237.16	1004.71	1248.68	322.38	385.595	329.527	520.473	416.057	449.093	2372.71	3416.81	3444.52	3028.4	3132.51	4218.19
M617T266_pos	Epicatechin-(4beta->8)-ent-epicatechin	Flavonoids	Proanthocyanidins	Proanthocyanidins	-	-0.683101	2.58274	-3.26584	6763.72	6763.72	6763.72	6763.72	6763.72	6763.72	8081.18	5745.4	6321.64	5258.33	6035.56	3208.17	12488.9	8926.68	7783.78	10183.1	8215.34	8036.27	1215.58	1040.14	984.97	843.876	915.721	783.664
M611T175_neg	Cinnamtannin_D2	Flavonoids	Proanthocyanidins	Proanthocyanidins	-	3.32079	3.37609	-0.0552998	11064	11064	11064	11064	11064	11064	23674.4	17868.7	21020	20603.8	18387.4	13506.7	2417.26	720.643	2012.39	1974.26	2297.14	2093.47	2121.93	2812.58	779.905	1141.71	2024.13	2201.86
M327T222_neg	(-)-Acanthocarpan	Flavonoids	Pterocarpans	Pterocarpans	-	3.76467	0.682589	3.08208	63486.8	64050.3	52322.8	60495.9	63314.9	58660.9	69189.7	60301.3	73825.4	84160	68229.6	63820.7	5547.19	5462.67	5131.91	5005	4699.44	5019.89	38319.8	40470.8	40373.1	46349.1	48538.1	47333.4
M329T58_neg	Hildecarpin	Flavonoids	Pterocarpans	Pterocarpans	-	5.0998	1.54768	3.55212	303952	304490	155216	263592	256295	247063	281120	356669	372922	320231	413623	345535	13606.4	5495.72	12123.8	12491.6	4481.83	12751	15492.9	212779	17415.7	190010	144383	134860
M339T369_neg	Glyceocarpin	Flavonoids	Pterocarpans	Pterocarpans	ko00943(Isoflavonoid biosynthesis);	0.315645	-2.25116	2.56681	4378.07	6909.01	5399.17	6205.37	4901.76	5675.11	3847.3	3553.24	4422.43	3582.51	2434.68	3462.56	4344.28	635.042	753.974	3626.72	3716.73	4039.81	18102.3	19624.6	13372.4	16856.3	15270.3	18189.2
M533T250_pos	(-)-Maackiain-3-O-glucosyl-6''-O-malonate	Flavonoids	Pterocarpans	Pterocarpans	ko00943(Isoflavonoid biosynthesis);	6.65537	4.66919	1.98618	121834	125522	110235	122000	119749	119357	246160	287294	281059	248679	257639	228001	2750.35	3354.51	2213.05	2828.47	2062.85	2155.99	3334.56	17071	3103.17	16503.6	10163.2	10699.2
M517T492_neg	Medicarpin_3-O-glucoside-6'-malonate	Flavonoids	Pterocarpans	Pterocarpans	ko00943(Isoflavonoid biosynthesis);	-0.905197	-2.63438	1.72918	4708.8	4708.8	4708.8	4708.8	4708.8	4708.8	5358.75	4522.15	3582.37	6374.23	3855.7	3990.91	7407.62	7555.37	11595.7	8648.95	7405.94	9233.24	31130.3	25190.3	26748.4	25805.3	30993.4	32024.7
M405T348_neg	Rotenonone	Flavonoids	Rotenones	Rotenones	-	-0.616052	2.92715	-3.5432	14596.5	15668.8	12911.5	14343.5	14551.3	14363.2	15309.7	13981	23138.3	16449.9	22038.1	38533.1	37721.7	56761.7	26091.1	23866.2	16880.8	37083.4	3274.18	2983.42	2803.43	2306.19	2765.58	2886.59
M508T167_neg	Carmine	Glycosides	C-glycosides	Carmine	-	4.64109	4.1343	0.506787	208805	208805	208805	208805	208805	208805	227171	305765	274561	469908	520631	400982	5456.25	10819.9	14375	13047.9	24025.5	20405	7117.25	19554.8	7020.76	38323.3	24339.2	28866.3
M354T437_neg	1-(5-Phosphoribosyl)imidazole-4-acetate	Glycosides	N-glycosides	1-(5-Phosphoribosyl)imidazole-4-acetate	ko00340(Histidine metabolism);	-3.57914	-1.50023	-2.07891	13478.2	15063.2	11899	13508.7	13464.7	13506.3	2282.96	4418.61	6973.35	3006.29	3608.92	8136.7	52870.7	43986.6	54191	42263.3	91752.3	54684	12270.3	13107.9	13632.1	14822.1	14086.6	12497.1
M380T370_neg	2-Amino-5-formylamino-6-(5-phospho-D-ribosylamino)pyrimidin-4(3H)-one	Glycosides	N-glycosides	2-Amino-5-formylamino-6-(5-phospho-D-ribosylamino)pyrimidin-4(3H)-one	ko00740(Riboflavin metabolism);ko01100(Metabolic pathways);	-1.07013	-2.42477	1.35463	15206.9	13324.9	14648.6	14837.7	14319.3	14419.8	9313.04	6152.32	7720.81	5720.54	6629.64	6521.33	16154	16106.3	13803.9	14168.1	13026.6	15046.4	50132.3	27580.2	25650.2	48086.6	37805.9	36570.1
M573T178_pos	4'-O-Demethylrebeccamycin	Glycosides	N-glycosides	4'-O-Demethylrebeccamycin	ko01110(Biosynthesis of secondary metabolites);ko01100(Metabolic pathways);ko00404(Staurosporine biosynthesis);	4.74028	3.28768	1.45261	14714.1	12448.4	15088.1	15543.4	13623.8	14175.3	19668.3	23175.6	3277.14	25292.3	23266.6	26629.5	833.472	770.192	680.939	844.056	599.493	810.498	453.584	2931.34	3043.92	2825.38	1775.01	1393.15
M302T222_neg	5'-Phosphoribosylglycinamide	Glycosides	N-glycosides	5'-Phosphoribosylglycinamide	ko00230(Purine metabolism);ko01100(Metabolic pathways);ko01110(Biosynthesis of secondary metabolites);	2.30531	1.07469	1.23062	4191.98	4465.32	6696.41	4378.98	5409.21	4676.05	8170.32	6359.18	4951.65	9160.25	7898.3	5358.26	1519.93	1708.25	1466.62	1386.51	1161.18	1234.18	2800.92	3653.4	2970.37	3338.82	3301.46	3827.09
M276T461_pos	.gamma.-L-Glu-.epsilon.-L-Lys	Glycosides	N-glycosides	6-Hydroxyl-1,6-dihydropurine ribonucleoside	-	-1.49574	-3.7519	2.25616	8208.27	8208.27	8208.27	8208.27	8208.27	8208.27	2432.12	3472.68	1526.81	2548.47	1835.29	1971.09	6008.32	6878.6	5636.74	6855.02	7041.38	6458.91	45234.7	34159	25094.2	24554	28496.6	28193.4
M242T391_neg	Cytosine_arabinoside	Glycosides	N-glycosides	Cytarabine	-	-2.31909	-7.52665	5.20756	15850.1	15850.1	15850.1	15850.1	15850.1	15850.1	500.237	527.495	585.189	450.333	460.215	448.493	2474.17	1885.61	2944.69	2563.81	2401.74	2560.59	92141	80010	95928.6	92091.5	94859.3	92983.1
M260T301_neg	Hymexazol_N-glucoside	Glycosides	N-glycosides	Hymexazol N-glucoside	-	-2.22938	0.681214	-2.9106	11195.3	15423.3	14886.3	15619.8	12931.9	13775.2	10248.4	6802.88	6399.6	10090.2	7521.43	4543.74	26609.6	32135.6	41181.6	37331.3	40017.7	36587.6	4960.89	6448.66	6294.04	4050.92	2335.4	4352.02
M349T191_pos	IMP;Inosinic acid;Inosine monophosphate;Inosine 5'-monophosphate;Inosine 5'-phosphate;5'-Inosinate;5'-Inosinic acid;5'-Inosine monophosphate;5'-IMP	Glycosides	N-glycosides	IMP	ko01060(Biosynthesis of plant secondary metabolites);ko01110(Biosynthesis of secondary metabolites);ko01100(Metabolic pathways);ko00230(Purine metabolism);ko01070(Biosynthesis of plant hormones);	3.1921	2.51945	0.672644	17389.2	16234.1	10855.9	20537.1	15156.3	14504.3	34707.3	23563.6	31090.9	25755.4	27842.1	18766.7	1659.98	4252.32	3590.16	3292.78	2447.23	2453.04	9447.4	4073.46	7635.51	2904.02	2446.94	1699.16
M350T194_pos	N-(5-Phospho-D-ribosyl)anthranilate	Glycosides	N-glycosides	N-(5-Phospho-D-ribosyl)anthranilate	ko00400(Phenylalanine, tyrosine and tryptophan biosynthesis);ko01230(Biosynthesis of amino acids);ko01110(Biosynthesis of secondary metabolites);ko01100(Metabolic pathways);	1.82181	2.15418	-0.332379	3976.17	4403.08	2939.64	4078.1	3794.44	3747.17	8211.34	5686.95	6875.01	4125.57	5646.55	4262.14	2769.03	2111.12	1814	1516.74	269.84	1365.18	1623.9	1645.29	1728.59	1050.41	1077.49	694.183
M623T158_pos	100-2	Glycosides	O-glycosides	Anthraquinone glycosides	ko01110(Biosynthesis of secondary metabolites);ko01057(Biosynthesis of type II polyketide products);	-0.883688	-3.13094	2.24725	12393.5	14412.9	13965.4	14325.4	11783.4	14438.4	6338.91	5081.55	5995.41	6888.83	4431.08	4961.68	9603.01	11163	10175.4	10988.2	10228.4	10016.7	56731.3	57753.3	57440.4	61143.6	9662.79	52459.8
M553T42_pos	Panogenin-3-o-alpha-L-rhamnopyranoside	Glycosides	O-glycosides	Cardiac glycosides	-	-1.63512	0.767451	-2.40257	2333.48	1862.63	2419.64	2044.28	2232.17	2169.65	1888.28	1876.6	2288.28	1840.31	1739.38	1663.03	9241.81	6678.78	4092.02	6004.54	4207	4862.37	782.61	1907.86	914.489	972.88	1258.71	799.268
M588T198_neg	Novclobiocin_104	Glycosides	O-glycosides	Coumarin glycosides	ko01110(Biosynthesis of secondary metabolites);ko00401(Novobiocin biosynthesis);	-2.5524	0.0193727	-2.57177	2820.36	2339.37	4379.53	2562.16	3432.85	2826.63	2259.98	891.51	565.435	2422.29	1714.89	2387.33	11095.3	9260.64	10985.6	8822.83	9919.86	9992.79	1993.21	1360.48	1849.92	1463.62	1676.76	1760.83
M460T368_neg	Morphine-3-glucuronide	Glycosides	O-glycosides	Glycoalkaloid	ko00982(Drug metabolism - cytochrome P450);ko04976(Bile secretion);	-2.49507	-7.01591	4.52084	5048.34	5048.34	5048.34	5048.34	5048.34	5048.34	153.143	137.774	242.132	205.839	174.908	77.6822	1109.48	677.534	1223.24	1077.55	465.111	1036.61	23108.9	26159.2	25521.8	19255	15048.9	19222.5
M200T364_neg	Schizonepetoside_A	Glycosides	O-glycosides	Iridoid glycosides	-	-1.52338	-3.13844	1.61506	5239.34	3990.52	5866.28	4946.11	5316.25	4761.1	2316.66	2420.25	2276.77	2046.86	1661.29	1975.04	6298.47	4908.18	6704.26	7060.95	5828.75	5698.24	26793.4	19820.5	17179.1	15370.9	17836.3	14805
M411T142_pos	Rehmaionoside_C	Glycosides	O-glycosides	Iridoid glycosides	-	0.304074	2.93723	-2.63315	81166.8	83342.4	91720.8	63895.9	87679.7	84209.9	111460	70314.3	118911	91151.6	115446	104389	40544.2	117428	112429	72196.3	67878.1	84955.4	12131.4	13774.2	13370.7	13408.1	13818.2	13356.7
M481T178_pos	Paeoniflorin	Glycosides	O-glycosides	Iridoid glycosides	-	-1.81918	0.914564	-2.73375	20601.7	20601.7	20601.7	20601.7	20601.7	20601.7	27373.7	7427.55	16009.2	23701.1	12026.7	26586.4	64184.3	99577.3	56704.9	63635	59038.6	56056.5	13318.5	10758	11911.3	6513.55	13846.8	3664.93
M481T207_pos	Albiflorin	Glycosides	O-glycosides	Iridoid glycosides	-	0.284683	2.82668	-2.542	30913.7	33336	21149.2	33482.2	27935.9	28494	69277.2	52340.1	45012.5	46262.9	47216.6	43929.9	43645.9	52701.8	40265.5	42977.5	37257.1	32744.7	7720.41	9972.57	6550.9	5911.54	6105.27	6595.54
M361T370_pos	8-Epideoxyloganic_acid	Glycosides	O-glycosides	Iridoid glycosides	-	-0.672415	-4.74108	4.06866	9123.43	9123.43	9123.43	9123.43	9123.43	9123.43	791.791	730.383	1043.13	893.119	1002.14	911.904	763.661	818.33	1638.01	1632.49	1884.96	1824.86	23482.9	22756.1	24908.5	24874	23332.8	24320.7
M461T214_neg	Valerosidatum	Glycosides	O-glycosides	Iridoid glycosides	-	-1.97899	-4.54374	2.56475	8226.36	8226.36	8226.36	8226.36	8226.36	8226.36	2274.7	1625.5	1840.87	2040.8	1788.91	2458.12	6935.89	6164.48	7253.4	6560.96	6706.91	13798.3	42937.9	41273.2	43801.3	52198.6	51583.4	48766.5
M463T430_2_pos	Patrinoside	Glycosides	O-glycosides	Iridoid glycosides	-	-0.0668984	-2.22223	2.15533	1216.83	975.404	1154.46	1245.7	1081.89	1125.54	757.691	785.714	513.063	555.228	793.541	1017.07	544.024	503.848	621.822	942.483	1215.89	804.134	3565.63	3044.94	3524.43	2942.82	3630.92	3926.32
M347T271_neg	Schizonepetoside_E	Glycosides	O-glycosides	Iridoid glycosides	-	1.87647	4.35969	-2.48322	20162.8	17259.9	20058.9	17408.1	19472.8	18995.3	27876.8	54788.3	30948.5	30852.2	76140.5	50850.1	17941.8	10547.5	11398.3	12518.9	10332.1	11192.6	2531.75	2688.56	1906.23	2593.76	2192.59	1309.32
M607T447_neg	Amarogentin	Glycosides	O-glycosides	Iridoid glycosides	-	0.615389	-2.23405	2.84944	1758.78	1803.95	1623.77	1751.48	1734.77	1731.84	1147.4	2215.84	1109.18	1701.13	1449.66	1418.36	1196.84	1045.2	1111.41	827.901	907.335	813.226	9514.93	6826.51	7175.86	8635.87	5396.88	4986.26
M371T215_pos	Leonuridine	Glycosides	O-glycosides	Iridoid glycosides	-	-0.122977	2.21757	-2.34055	7681.61	7681.61	7681.61	7681.61	7681.61	7681.61	15816.7	8740.66	9932.44	7231.61	12221.6	17469.9	18880.9	12133.1	9485.6	11770.8	13311.8	12184.8	5669.31	1618.69	932.109	2916.09	2017.38	2200.4
M365T154_neg	Salicin_6-phosphate	Glycosides	O-glycosides	Phenolic glycosides	ko00010(Glycolysis / Gluconeogenesis);	3.39636	2.91872	0.477644	10706.2	8780.4	6801.1	10284.5	8691.12	8794.24	16998.7	21851.7	16112.9	11692	14159.8	28096.2	1933.38	2316.75	2281.2	2361.19	355.802	1095.14	2978.66	2561.75	2807.53	2537.85	2888.24	628.892
M287T202_pos	Salicin	Glycosides	O-glycosides	Phenolic glycosides	ko00010(Glycolysis / Gluconeogenesis);	-1.01878	2.33148	-3.35027	13389.3	18268.1	16160.7	15236.8	16405.7	15332.1	18786.2	11840.1	17953.7	10323.2	13464.6	11628.4	22601.3	31505.5	31576.9	24242.2	29702	30565.6	2230.28	2804.36	2887.26	2461.52	2902.26	3402.63
M549T71_neg	Clematichinenoside_A	Glycosides	O-glycosides	Saponins	-	-2.71401	-0.84293	-1.87108	9849.2	8869.32	11296.3	10151.3	9723.63	9976.51	6177.36	5446.01	6717.54	3953.5	5929.75	4860.62	43033.2	26891.4	41543.3	39415.2	35876.2	30323.4	6801.03	11925.8	15538.8	9421.49	8305.49	7351.19
M487T371_pos	4-Hydroxyglucobrassicin	Glycosides	S-glycosides	4-Hydroxyglucobrassicin	-	-0.883656	3.18442	-4.06808	2556.29	2556.29	2556.29	2556.29	2556.29	2556.29	5089.23	3983.17	6626.91	8185.59	9976.27	10242.6	7240.8	12037.9	12913	17308	15685.1	16188.5	855.115	640.633	675.498	1080.39	569.366	1030.42
M407T263_pos	Indolylmethyl-desulfoglucosinolate	Glycosides	S-glycosides	Indolylmethyl-desulfoglucosinolate	ko00966(Glucosinolate biosynthesis);ko01210(2-Oxocarboxylic acid metabolism);ko01110(Biosynthesis of secondary metabolites);ko00380(Tryptophan metabolism);	-1.08467	2.62185	-3.70653	53351.6	53351.6	53351.6	53351.6	53351.6	53351.6	51863.6	42469.9	37933.4	27173.3	35629	37408.8	110739	89955.8	56893.9	85106	65340.3	85026.7	7192.2	7764.41	6753.8	6486.3	6698.87	2872.53
M265T307_neg	Lincomycin_hydrochloride	Glycosides	S-glycosides	Lincomycin hydrochloride	-	1.82831	4.51114	-2.68283	8536.48	7652.1	4736.33	8536.69	6657.79	7044.66	7407.67	27941.2	10751.7	124706	232824	7157.53	16459.7	18228.9	12756.8	18229.5	23852	26148.8	1616.6	2699.55	2133.61	4682.83	2582.18	4300.04
M367T36_neg	Tetracosanoic_acid	Lipids	Fatty acids	Fatty Acids and Conjugates	ko01040(Biosynthesis of unsaturated fatty acids);	1.34542	-1.22663	2.57206	6445.51	7511.06	6158.21	5613.71	7003.83	6578.93	6000.88	6493.91	5478.08	7766.04	7096.12	3449.86	4457.75	1171.53	948.716	817.005	4183.72	2700.8	8215.13	18927.4	8178.31	21229.5	15233.2	13130.5
M277T205_neg	Linolenate; alpha-Linolenate;(9Z,12Z,15Z)-Octadecatrienoic_acid	Lipids	Fatty acids	Fatty Acids and Conjugates	ko00592(alpha-Linolenic acid metabolism);ko01110(Biosynthesis of secondary metabolites);ko01100(Metabolic pathways);ko01070(Biosynthesis of plant hormones);ko01040(Biosynthesis of unsaturated fatty acids);ko01060(Biosynthesis of plant secondary metabolites);	-0.409719	-4.0783	3.66858	3877.08	5073.28	4280.95	4149.88	4343.83	4381.76	454.717	1197.93	1107.13	1506.07	907.365	1466.15	2024.31	1410.63	1701.37	447.239	1817.31	1419.06	6891.14	26859.3	10144	28174.8	18280.6	21804.5
M309T37_neg	Icosenoic_acid	Lipids	Fatty acids	Fatty Acids and Conjugates	ko01040(Biosynthesis of unsaturated fatty acids);	1.35891	-2.20229	3.5612	5090.14	4644.38	5852.95	4693.36	5183.53	5134.04	3770.32	2604.76	3304.94	2837.88	3526.01	3625.68	2667.88	1012.35	632.826	353.687	903.274	2098.72	8699.75	19622.9	10179.6	21566.5	14959.6	15493
M279T205_neg	Malvalic_acid	Lipids	Fatty acids related compounds	Fatty Acids and Conjugates	-	0.0824386	-4.11601	4.19845	15080.7	16893.6	14960.5	15838.8	16408.1	15229.3	4243.88	4106.35	5129.67	5978.05	5703.9	4664.1	8131.55	3058.69	5252.94	2118.65	5350.03	4257.55	44682.3	121148	57685.9	116592	85932.9	91133.3
M193T192_pos	(-)-Jasmonic_acid	Lipids	Fatty acids related compounds	Octadecanoids	ko01110(Biosynthesis of secondary metabolites);ko01100(Metabolic pathways);ko00592(alpha-Linolenic acid metabolism);ko04075(Plant hormone signal transduction);ko01070(Biosynthesis of plant hormones);ko01060(Biosynthesis of plant secondary metabolites);	0.0574923	2.19034	-2.13284	12748.5	12748.5	12748.5	12748.5	12748.5	12748.5	28135	22824	22504.5	18551.9	17730.7	19213.2	25493.8	18710.6	25688.1	15646.6	16887.5	21494.7	4302.38	4883.36	5324.15	4407.28	4854.78	4483.09
M134T332_pos	Hexanoic_acid	Lipids	Fatty acids related compounds	Fatty Acids and Conjugates	-	-2.66917	-0.14001	-2.52916	2047.22	2047.22	2047.22	2047.22	2047.22	2047.22	2543.43	1126.72	2255.46	1558.26	1055.19	938.087	5644.96	13845.6	8056.57	12250.9	10663.1	9819.35	1389.26	1776.25	2074.89	1634.91	1774.05	1793.64
M339T36_neg	Docosanoic_acid	Lipids	Fatty acids related compounds	Fatty Acids and Conjugates	ko01040(Biosynthesis of unsaturated fatty acids);ko00073(Cutin, suberine and wax biosynthesis);	1.91413	-1.4976	3.41173	5833.77	5833.77	5833.77	5833.77	5833.77	5833.77	5650.57	10542.9	10895	7702.77	5371.12	3585.82	3016.83	1402.28	1607.52	818.134	2123.98	2639.07	12301	34262.3	19404.9	26813.3	16378.6	14372.7
M277T39_neg	Palmitic acid	Lipids	Fatty acids related compounds	Fatty Acids and Conjugates	ko01040(Biosynthesis of unsaturated fatty acids);ko00062(Fatty acid elongation);ko01060(Biosynthesis of plant secondary metabolites);ko00071(Fatty acid degradation);ko01100(Metabolic pathways);ko00061(Fatty acid biosynthesis);ko01212(Fatty acid metabolism);ko00073(Cutin, suberine and wax biosynthesis);	0.445701	-5.44793	5.89364	74136.1	75254.7	72877.7	74435.5	73605.8	74406.9	5222.55	5412.82	6303.68	8410.8	6225.26	6024.26	7692.28	3567.52	2390.49	2424.56	7149.78	4381.87	195579	337323	204154	353287	275821	275076
M316T157_pos	Ricinoleic_acid	Lipids	Fatty acids related compounds	Fatty Acids and Conjugates	-	-5.84422	-5.44447	-0.399751	31616.8	31616.8	31616.8	31616.8	31616.8	31616.8	2638.59	495.118	1874.46	1086.86	2239.76	967.374	232318	65963.1	57509.8	49333.2	68193.4	61084.5	47244.3	76268	52999	89497.1	64975.5	74087.1
M281T37_neg	(9Z)-Octadecenoic acid; (Z)-Octadec-9-enoic acid; Oleate; Oleic acid	Lipids	Fatty acids related compounds	Fatty Acids and Conjugates	ko00061(Fatty acid biosynthesis);ko01040(Biosynthesis of unsaturated fatty acids);ko01060(Biosynthesis of plant secondary metabolites);ko00073(Cutin, suberine and wax biosynthesis);	0.122803	-4.50827	4.63107	193750	200736	194228	193877	196927	195891	34725.2	25145.8	37079.4	25693.5	30353.2	31212.9	23385.1	20731	17105.2	14552.4	28093.3	65311.9	446783	887101	490515	942511	695133	730109
M279T38_neg	Linoleate	Lipids	Fatty acids related compounds	Fatty Acids and Conjugates	ko01100(Metabolic pathways);ko01060(Biosynthesis of plant secondary metabolites);ko01040(Biosynthesis of unsaturated fatty acids);ko00591(Linoleic acid metabolism);	0.704828	-6.06261	6.76744	237421	228468	220745	232185	225517	231523	13519.6	14831.8	12774.1	12772.4	13183.3	12539.8	13354.6	5621.32	6072.05	4617.34	10372.4	8811.12	604600	1.09143e+06	633707	1.16736e+06	886703	937950
M277T165_neg	gamma-Linolenic acid; Gamolenic acid;(6Z,9Z,12Z)-Octadecatrienoic_acid	Lipids	Fatty acids related compounds	Fatty Acids and Conjugates	ko01100(Metabolic pathways);ko00591(Linoleic acid metabolism);ko01040(Biosynthesis of unsaturated fatty acids);	-0.150401	-3.83419	3.68379	7732.95	6879.66	7581.11	7413.62	7398.75	7392.24	2502.68	2769.26	1739.9	1665.3	1525.82	1371.9	3561.67	1661.42	2089.44	767.289	3332.33	1434.56	18203	46505.8	17968.9	32607.5	23375.7	26429.4
M281T163_neg	(11E)-Octadecenoic acid;Vaccenic acid;trans-11-Octadecenoic acid	Lipids	Fatty acids related compounds	Fatty Acids and Conjugates	-	-0.308218	-6.30082	5.99261	13535.4	12466.2	10400.8	12946.7	13039.7	11769.3	1254.58	956.872	1196.29	1392.9	732.653	1077.2	1858.9	1326.24	1391.51	1158.21	1190.23	1259.89	55662	117859	54318	120345	67233.1	105744
M118T286_pos	3-Hexenol	Lipids	Fatty acyls	Fatty alcohols	ko01110(Biosynthesis of secondary metabolites);ko00592(alpha-Linolenic acid metabolism);	-0.130419	-2.1364	2.00598	6091.41	6091.41	6091.41	6091.41	6091.41	6091.41	2702.61	2977.62	7230.48	3865.57	6461.23	2688.24	5457.43	4957.04	2801.28	6484.13	2928.23	5750.54	23161.2	17145.4	7936.75	17672.5	22563.2	25507.1
M104T391_pos	Prenol	Lipids	Fatty acyls	Fatty alcohols	ko00740(Riboflavin metabolism);	0.118442	-2.07948	2.19793	71677.3	69629.7	72308.1	65114	72159.9	70877.3	33832.7	36000.9	34122	39494.9	34991.4	43122.6	33526	33816.9	31902.2	34128.3	34282.2	36445.6	161041	137716	190312	150575	150398	146414
M261T33_pos	Hexadecenal	Lipids	Fatty acyls	Fatty aldehydes	-	0.0033823	-2.04562	2.04901	26462	20768	22035.6	22855.7	22947	23268.4	13196.4	12597.5	12210.8	15648.8	15747.3	14235.9	25561.7	10671.1	7043.57	10518.7	15835.4	13810.3	33738.3	75745.3	36994.5	78114.4	57957.8	62744.8
M427T470_1_pos	Nonacosane	Lipids	Fatty acyls	Hydrocarbons	-	-3.12014	5.44886	-8.569	3424.57	3424.57	3424.57	3424.57	3424.57	3424.57	1512.62	2329.27	2019.78	2213.17	1295.61	1864.33	13024.4	22438.2	21624.7	6979.25	22476.1	11140.3	15.3515	53.399	47.7981	69.4589	61.5893	9.61652
M129T69_pos	alpha-Amino-gamma-cyanobutanoate	Lipids	Fatty acyls	Fatty Acids and Conjugates	-	-2.04873	0.685397	-2.73413	6728.46	4209.2	5221.07	5098.57	5641.44	5210.76	6172.16	7010.95	1977.32	5948.7	6073.6	6687.84	12671.9	19119.8	23395.4	23196.3	30848.1	30905.6	3929.84	3592.54	2798.55	3591.73	4091.85	3057.39
M129T367_pos	gamma-Amino-gamma-cyanobutanoate	Lipids	Fatty acyls	Fatty Acids and Conjugates	ko00460(Cyanoamino acid metabolism);	-1.40883	1.22132	-2.63015	5320.87	5852.32	5472.19	6787.51	5104.36	5734.74	8549.19	9404.23	8649.8	8364.28	9113.13	8269.47	21584.5	24646.8	22089.7	25968.9	22277.1	22434	4187.07	1920.11	5921.99	3400.42	3390.09	3632.73
M189T566_pos	7,8-Diaminononanoate	Lipids	Fatty acyls	Fatty Acids and Conjugates	ko01100(Metabolic pathways);ko00780(Biotin metabolism);	-0.835054	-2.6429	1.80784	6314.86	5337.87	5732.49	5830.6	5816.74	5799.93	2000.72	3389.87	3048.3	3510.19	3206.44	3233.01	3986.87	5583.79	5139.27	5290.19	5646.14	7157.48	24708.4	10269.7	19516.5	16011	19219.2	25127.4
M295T37_neg	Lactobacillic_acid	Lipids	Fatty acyls	Fatty Acids and Conjugates	-	1.32867	-0.778461	2.10713	1912.86	2491.99	2679.33	2913.26	1633.2	2728.37	3249.09	1530.29	2987.66	2004.72	3430.83	2635.22	1852.43	543.375	644.437	530.526	1581.22	1153.61	3631	5210.23	4488.11	5219.62	4131.13	4486.51
M201T191_neg	Sebacic_acid	Lipids	Fatty acyls	Fatty Acids and Conjugates	-	0.337864	3.16901	-2.83115	27542	27542	27542	27542	27542	27542	57977.3	38102.7	45239.8	46619.8	32912.8	40816.7	37312.5	38254.6	38370.7	33299.6	30469.9	29328.3	4925.55	9986.84	4070.1	3254.19	3533.18	3322.83
M355T104_pos	(2S,3S)-2-Hydroxytridecane-1,2,3-tricarboxylate	Lipids	Fatty acyls	Fatty Acids and Conjugates	-	-2.43902	2.3538	-4.79282	649857	612739	681049	633553	643272	647741	61899	465439	415881	481165	330239	427370	1.73758e+06	2.28641e+06	1.85566e+06	1.982e+06	1.80647e+06	2.16427e+06	73551.6	85361.7	73413.5	76749.9	72771.9	45015.3
M227T86_neg	Traumatic	Lipids	Fatty acyls	Fatty Acids and Conjugates	ko01110(Biosynthesis of secondary metabolites);ko00592(alpha-Linolenic acid metabolism);	-0.234153	4.25627	-4.49042	84271.1	84271.1	84271.1	84271.1	84271.1	84271.1	160463	106318	124801	73315.7	110845	84778.8	161984	169160	81266.4	132345	110723	121439	6814.87	7690.88	6107.77	4894.07	3855.85	5200.45
M129T463_neg	2-Methylmaleate; Citraconate; Citraconic acid; Methylmaleic acid	Lipids	Fatty acyls	Fatty Acids and Conjugates	ko00660(C5-Branched dibasic acid metabolism);ko00290(Valine, leucine and isoleucine biosynthesis);ko01100(Metabolic pathways);ko01210(2-Oxocarboxylic acid metabolism);	-2.50536	-1.0218	-1.48356	15078.8	16822.9	15154	15788.1	15405.1	15791.6	9325.04	16222.7	12844.5	16118.6	15755.8	13754.1	79497.6	47642.9	83364.2	108352	77141.4	81063.6	22136.2	29008.3	33446.3	29427.8	30777.4	25804.3
M185T69_neg	Maleylpyruvate	Lipids	Fatty acyls	Fatty Acids and Conjugates	ko01100(Metabolic pathways);ko00350(Tyrosine metabolism);	-0.135547	3.06083	-3.19637	33908.8	29592.8	33650.8	34623.7	30646.2	33163.1	51950.3	57982.4	51623.2	48352.1	59552.4	54533.5	60800.1	49089.9	61681.4	61521.6	55197.9	67619.6	6062.87	5507.78	7291.4	8252.75	4447.41	7265.04
M199T70_neg	4-Fumarylacetoacetate	Lipids	Fatty acyls	Fatty Acids and Conjugates	ko00350(Tyrosine metabolism);ko01100(Metabolic pathways);	0.311614	4.48085	-4.16924	90097.1	80046.9	88677.6	85973.1	85702.7	86493.7	151281	177448	139541	173332	172516	138654	156918	97810.3	119201	129106	143348	121302	6544.67	9193.65	9276.84	6071.64	4999.93	6582.84
M270T172_pos	O-Butanoylcarnitine	Lipids	Fatty acyls	Fatty esters	-	-4.40951	-5.92225	1.51274	31207.6	32669.4	27984.8	29623.2	31318.7	30430.3	2243.11	3444.6	2461.29	1183.63	1858.14	1709.54	35216.4	53170.1	52939.8	45810.6	43769	43248.3	155813	120866	140029	116376	123238	125981
M925T519_neg	(S)-3-Hydroxyoctanoyl-CoA	Lipids	Fatty acyls	Fatty esters	ko00071(Fatty acid degradation);ko01100(Metabolic pathways);ko00062(Fatty acid elongation);ko01212(Fatty acid metabolism);	1.48934	-3.09021	4.57955	4180.47	4180.47	4180.47	4180.47	4180.47	4180.47	3667.45	2942.67	3080.95	4376.27	4666.12	5520.04	694.584	1366.34	1528.77	1397.12	1599.17	2052.54	26613	26537.3	29476.1	49202.6	35263.6	39455.5
M1054T526_pos	Oleoyl-CoA	Lipids	Fatty acyls	Fatty esters	ko01212(Fatty acid metabolism);ko01040(Biosynthesis of unsaturated fatty acids);	1.11729	4.08216	-2.96487	4518.05	5043.72	4526.31	4761.95	4675.3	4694.16	14028.9	10176.6	14949.7	9441.78	13485.6	11185.7	1507.27	5928.4	6008.66	6749.27	6976.67	6603.44	891.194	571.449	713.64	594.676	579.771	975.04
M897T210_neg	(S)-Hydroxyhexanoyl-CoA	Lipids	Fatty acyls	Fatty esters	ko00062(Fatty acid elongation);ko01212(Fatty acid metabolism);ko01100(Metabolic pathways);ko00071(Fatty acid degradation);	7.46342	5.88871	1.57471	17473.5	17473.5	17473.5	17473.5	17473.5	17473.5	26675.4	55123.6	51368.7	34692	30008.2	29602.5	262.897	349.311	176.867	178.162	151.991	169.65	331.795	1078.47	370.212	598.997	646.293	813.491
M867T209_neg	Pentanoyl-CoA	Lipids	Fatty acyls	Fatty esters	ko00630(Glyoxylate and dicarboxylate metabolism);	5.57037	4.99988	0.570495	2137.11	1859.56	2097.96	2034.09	2031	2028.42	8426.6	11939.4	5149.19	4680.57	3708.52	6410.27	141.66	234.899	125.255	67.3567	128.474	150.778	122.624	196.324	136.168	223.935	243.326	337.561
M879T251_neg	trans-Hex-2-enoyl-CoA	Lipids	Fatty acyls	Fatty esters	ko01212(Fatty acid metabolism);ko00071(Fatty acid degradation);ko00062(Fatty acid elongation);ko01100(Metabolic pathways);	7.47289	6.56545	0.90744	5214.45	5214.45	5214.45	5214.45	5214.45	5214.45	7747.94	20059.9	13391.8	17955.5	4676.43	17619.4	63.0779	54.5208	146.357	59.3105	45.142	90.0853	53.3298	254.142	106.165	233.959	83.4878	128.919
M1011T430_pos	Biotinyl-CoA	Lipids	Fatty acyls	Fatty esters	ko00780(Biotin metabolism);	3.92591	1.99692	1.92898	1729.17	1729.17	1729.17	1729.17	1729.17	1729.17	3290.29	5461.96	3415.57	3811.75	3803.69	3408.9	144.377	304.574	284.01	296.429	212.194	284.314	1085.95	1224.11	769.512	877.746	1035.1	818
M1123T419_pos	(2E,6Z,9Z,12Z,15Z,18Z)-Tetracosahexa-2,6,9,12,15,18-enoyl-CoA	Lipids	Fatty acyls	Fatty esters	ko01212(Fatty acid metabolism);	0.0160148	-6.00162	6.01764	422.543	409.835	394.536	668.448	381.527	418.532	47.1657	48.8021	30.2335	10.0775	17.8515	8.53726	19.4587	14.4517	72.5227	25.8953	16.4137	12.1297	1862.52	1839.81	1733.58	1652.82	1793	1540.71
M557T471_neg	3-Oxopropionyl-CoA	Lipids	Fatty acyls	Fatty esters	ko01100(Metabolic pathways);ko00640(Propanoate metabolism);	-1.08586	-2.04367	0.957809	5785.32	7272.45	6069.16	6347.42	5535.88	6785.06	2183.89	3085.18	2335.41	2749.63	1557.51	2083.06	3986.28	5796.62	6639.28	3637.15	4141.23	5505.06	7534.53	11144.9	9376.05	13296.9	7833.7	8512.81
M703T507_neg	Dephospho-CoA	Lipids	Fatty acyls	Fatty esters	ko00770(Pantothenate and CoA biosynthesis);ko01100(Metabolic pathways);	-0.082814	-4.3169	4.23408	11386.1	11440.6	11390.7	11412.8	11391	11412.8	1738.73	2500.96	2508.23	2837.98	2160.96	2200.43	2081.18	2648.93	2572.73	3980.07	1739.43	1748.97	37844.3	36003.4	44613.7	68399.1	42940.6	48173.2
M883T503_neg	(2S,3S)-3-Hydroxy-2-methylbutanoyl-CoA	Lipids	Fatty acyls	Fatty esters	ko00280(Valine, leucine and isoleucine degradation);ko01110(Biosynthesis of secondary metabolites);ko01100(Metabolic pathways);	0.854686	-1.62931	2.484	5926.98	5926.98	5926.98	5926.98	5926.98	5926.98	4718.65	4132.86	5357.48	5848.36	4852.13	3829.03	1690.12	2094.38	3569.68	2765.48	3244.37	2527.95	9756.9	14949.2	18185.9	16125.4	12680.8	17208.6
M389T256_pos	Tuberonic_acid_glucoside	Lipids	Fatty acyls	Octadecanoids	-	0.12394	3.45429	-3.33035	31207	30089	26682.9	30503	29477.4	29424.9	45338.5	45961.2	62323.9	39532.2	43840.7	41317.1	33606.3	30762.4	33762.3	60786.3	26878.3	69606.7	3595.07	4504.71	3718.85	4965.3	4289.14	4318.53
M229T205_neg	N-Heptanoylhomoserine_lactone	Lipids	Fatty acyls	Fatty amides	ko02024(Quorum sensing);	-3.06439	-5.26008	2.19569	17803.2	18035.8	15891.2	17539.3	17032.3	17436.6	2616.86	1235.53	2923	2538.44	2036.1	2245.93	16916.1	18959.8	21104.4	19421.6	19021.3	18308.1	65575.8	81968.3	80104.4	99888.3	98277.9	95199.3
M157T428_neg	2,3,5-Trichloro-cis,cis-muconate	Lipids	Fatty acyls	Fatty Acids and Conjugates	ko01100(Metabolic pathways);	-1.49617	-2.86604	1.36987	920.943	1000.02	1813.92	1283.36	884.719	1314.46	619.554	785.655	487.135	611.324	488.637	304.954	1251.86	2175.9	1386.99	1957.22	1551.7	977.672	4449.93	3399.15	3891.86	4286.38	4198.82	3812.98
M355T42_2_neg	13-Hydroxydocosanoic_acid	Lipids	Fatty acyls	Fatty Acids and Conjugates	-	0.0847942	-5.56974	5.65453	4644.34	5174.49	4880.01	4859.2	4551.74	5066.27	192.256	505.094	331.992	379.291	740.487	366.373	398.838	112.094	156.005	54.4651	496.258	1154.25	10403.7	31566.5	8860.54	28185.6	21469.4	18990.4
M271T43_neg	16-Hydroxypalmitate	Lipids	Fatty acyls	Fatty Acids and Conjugates	ko00073(Cutin, suberine and wax biosynthesis);ko01100(Metabolic pathways);	-0.369267	-2.80809	2.43883	5393.17	5022.62	2316.07	4360.95	4158.78	4100.74	2101.29	2667.48	2293.54	1428.01	1594.49	1434.28	3482.75	2053.96	2045.51	1692.69	2411.36	3192.91	14843.9	15145.7	14324.6	13191.3	13792.9	9376.51
M173T435_pos	(R)-2,3-Dihydroxy-3-methylbutanoate	Lipids	Fatty acyls	Fatty Acids and Conjugates	ko01230(Biosynthesis of amino acids);ko00290(Valine, leucine and isoleucine biosynthesis);ko01210(2-Oxocarboxylic acid metabolism);ko01100(Metabolic pathways);ko01110(Biosynthesis of secondary metabolites);	-2.73845	-3.40434	0.665893	1031.19	1031.19	1031.19	1031.19	1031.19	1031.19	441.248	395.867	350.588	305.661	229.741	224.768	1121.65	2515.19	2101.78	2116.64	2887.37	2256.55	4945.74	5970.75	4082.19	2225.81	904.235	2495.14
M214T310_pos	2-Amino-3,7-dideoxy-D-threo-hept-6-ulosonic	Lipids	Fatty acyls	Fatty Acids and Conjugates	ko01110(Biosynthesis of secondary metabolites);ko00400(Phenylalanine, tyrosine and tryptophan biosynthesis);	1.26386	2.11807	-0.854212	5371.63	5371.63	5371.63	5371.63	5371.63	5371.63	14952.8	9217.23	15111.8	5447.83	8751.52	7892.87	2118.53	4502.2	5577.16	5258.41	3709.79	4391.78	4577.82	3101.88	1946.53	1167.53	1596.78	1747.23
M205T297_neg	2-Methylcitrate	Lipids	Fatty acyls	Fatty Acids and Conjugates	ko00640(Propanoate metabolism);	-0.978505	1.59478	-2.57328	117003	117003	117003	117003	117003	117003	116256	110294	161755	135897	124727	129679	245655	199032	326365	227436	300215	235483	22415.3	51924.4	30379.7	54306.4	61156.8	37593.4
M163T370_pos	(R)-2-Ethylmalate	Lipids	Fatty acyls	Fatty Acids and Conjugates	ko00620(Pyruvate metabolism);	-0.378008	-2.92066	2.54265	9673.88	9673.88	9673.88	9673.88	9673.88	9673.88	3466.83	2036.04	3893.97	2512.01	3692.41	2884.59	2281.61	4202.8	5148.51	4534.41	4234.73	3621.14	24338.8	20727.6	27513.8	21891.9	24846.2	20655
M244T159_neg	(R)-5-Phosphomevalonate	Lipids	Fatty acyls	Fatty Acids and Conjugates	ko00900(Terpenoid backbone biosynthesis);ko01100(Metabolic pathways);ko01110(Biosynthesis of secondary metabolites);	-1.33808	-2.63852	1.30043	33000.9	33000.9	33000.9	33000.9	33000.9	33000.9	21979	21721.3	19507.7	21198.6	13983.9	18390.1	54285.7	48250.5	56926.7	43400	48441.8	43934.8	157667	126438	140923	134940	79780	87435.9
M147T65_neg	(R)-Mevalonate;Mevalonic acid;3,5-Dihydroxy-3-methylvaleric acid;(3R)-3,5-Dihydroxy-3-methylpentanoic acid;(R)-Mevalonic acid	Lipids	Fatty acyls	Fatty Acids and Conjugates	ko00900(Terpenoid backbone biosynthesis);ko01060(Biosynthesis of plant secondary metabolites);ko01062(Biosynthesis of terpenoids and steroids);ko01070(Biosynthesis of plant hormones);ko01100(Metabolic pathways);ko01110(Biosynthesis of secondary metabolites);ko04216(Ferroptosis);	-2.44562	3.32145	-5.76708	95585.8	95585.8	95585.8	95585.8	95585.8	95585.8	85395.3	59211.4	67089.3	47916.5	57795.8	81820.9	430520	323970	322025	228583	382983	486765	6923.5	8116.27	6402.34	2542.59	6930.87	9020.56
M299T42_2_neg	(S)-2-Hydroxystearate	Lipids	Fatty acyls	Fatty Acids and Conjugates	-	-0.466642	-2.53248	2.06584	2431.34	2431.34	2431.34	2431.34	2431.34	2431.34	1391.12	995.054	848.143	574.308	1830.98	1117.03	1007.87	612.827	436.864	791.081	3351.39	3136.89	5211.48	5009.13	4766.54	7669.32	8679.37	7755.73
M482T212_pos	N-Acetylleukotriene_E4	Lipids	Fatty acyls	Eicosanoids	-	0.674093	3.34115	-2.66705	11768.5	11768.5	11768.5	11768.5	11768.5	11768.5	16035	26663.5	17701	26483.8	35536.4	32506.1	10181.9	8215.18	19463.8	12903.2	26924.1	19407.7	1307.08	2301.58	1438.13	2851.27	4157.5	3232.01
M295T43_neg	9(S)-HODE	Lipids	Fatty acyls	Octadecanoids	ko00591(Linoleic acid metabolism);	1.91187	-0.748544	2.66042	108606	96754.6	120616	105312	107343	107996	88629.8	154985	105853	191428	152130	122821	48194.7	31826.8	26600.4	26817.5	47037	36332.7	229095	187465	383945	201007	201461	167729
M329T91_neg	9,10-Dihydroxy-12,13-epoxyoctadecanoate	Lipids	Fatty acyls	Octadecanoids	ko00591(Linoleic acid metabolism);	-1.52468	-3.63255	2.10787	67890.7	59571.9	54456.8	79636.9	56910.9	62626.7	24301.7	20489.7	14030.1	17161.6	18411.5	18967.6	79142.9	49360.4	37610.9	42143.2	56333.1	61579.5	412829	239698	67630.3	173289	259010	253510
M297T42_neg	cis-9,10-Epoxystearic_acid	Lipids	Fatty acyls	Octadecanoids	ko00073(Cutin, suberine and wax biosynthesis);	-0.164603	-4.00034	3.83574	10104	9244.88	9283.14	9352.49	9941.5	9393.66	3559.17	3747.76	2421.2	3428.84	4179.02	1907.65	3524.81	3161.28	1655.11	1386.57	3564.33	8277.3	63424	50148.1	63893.4	37073.2	45497.3	47935
M243T193_neg	N-(6-Aminohexanoyl)-6-aminohexanoate	Lipids	Fatty acyls	Other Fatty Acyls	ko00930(Caprolactam degradation);ko01120(Microbial metabolism in diverse environments);	-3.61516	-3.16191	-0.453249	20041.2	20041.2	20041.2	20041.2	20041.2	20041.2	4683.71	7108.61	5784.44	5409.07	4919.62	4593.1	69086.3	68959.4	76299.1	60747	58330.1	64809.4	42465.5	57541.5	45617.7	48531.7	47896.7	48813.5
M246T354_neg	Volicitin	Lipids	Fatty acyls	Other Fatty Acyls	ko00592(alpha-Linolenic acid metabolism);	-0.752595	-2.82676	2.07417	5427.33	6832.02	5307.76	6535.68	5628.87	5901.75	5965.99	4406.27	5384.92	4849.47	7320.37	7171.96	10298.7	1420.44	9712.74	10694	13061.2	13948.3	41114.4	33420.9	40514.8	39263.6	46463.4	48243.4
M383T41_neg	2-Hydroxytetracosanoic	Lipids	Fatty Acyls	Others	-	0.380328	-4.07426	4.45459	4233.79	4559.96	4338.77	4350.97	4368.53	4372.43	581.859	411.507	1330.36	642.332	1057.15	896.954	1417.13	438.13	361.123	98.3355	449.701	1015.56	9607.09	16671	9374.6	17628	16455.8	13144.6
M306T349_neg	S-Succinyldihydrolipoamide	Lipids	Fatty Acyls	Others	-	-0.772755	1.66481	-2.43756	14063.7	13394.6	14955.1	14023.3	15405.1	13449.1	17813.8	12449.5	14456.9	29245	26658.2	13231	30134.9	31427.1	26003.7	35005	30738.9	41214.1	6009.03	5833.01	6649.95	5858.03	5882.82	5675.3
M161T303_neg	3-Hydroxy-3-methylglutarate;3-Hydorxy-3-methylglutaric acid;beta-Hydroxy-beta-methylglutaric acid;Dicrotalic acid;3-Hydroxy-3-methylpentanedioic acid;Meglutol	Lipids	Fatty Acyls	Others	-	-1.29297	1.16899	-2.46196	53056.4	52637.2	38543.4	49444.3	48500.8	48079.9	29235.2	92821.1	90352.9	79668.1	81116.3	63336.1	57160.4	245508	241314	198329	119904	207424	36271.5	36788.5	38335.9	50862.6	16971.2	14909.7
M347T390_pos	2-Oxo-10-methylthiodecanoic_acid	Lipids	Fatty acyls	Fatty Acids and Conjugates	ko01210(2-Oxocarboxylic acid metabolism);ko01110(Biosynthesis of secondary metabolites);ko00966(Glucosinolate biosynthesis);	1.6327	3.18207	-1.54937	2200.37	1877.84	1936.34	1740.68	2126.4	1964.24	8308.29	10166.4	9031.31	10644.3	9952.81	7972.93	1383.59	2840.56	3205.65	3092.27	4322	3239.61	537.849	1499.07	1247.6	858.289	976.559	1059.09
M229T506_2_pos	2-Oxo-7-methylthioheptanoic_acid	Lipids	Fatty acyls	Fatty Acids and Conjugates	ko00966(Glucosinolate biosynthesis);ko01210(2-Oxocarboxylic acid metabolism);ko01110(Biosynthesis of secondary metabolites);	-1.18176	1.41491	-2.59667	5528.22	5410.25	5604.08	5596.08	5364.28	5584.35	3614.78	4882.61	4231.89	4742.46	4041.78	4368	10983	10325	9604.74	9565.61	8995.39	9239.46	1393.07	1901.32	1318.24	1627.48	1472.34	1993.98
M211T95_neg	12-Oxo-9(Z)-dodecenoic_acid	Lipids	Fatty acyls	Fatty Acids and Conjugates	ko01110(Biosynthesis of secondary metabolites);ko00592(alpha-Linolenic acid metabolism);	-1.12303	-4.85231	3.72928	9940.73	9940.73	9940.73	9940.73	9940.73	9940.73	2260.98	1775.39	2612.54	2372.26	2439.14	275.384	4331.27	3197.46	4774.38	6164.15	4932.41	2161.13	50522.5	48136.3	55417.1	66508.9	66003.9	52411.6
M186T210_neg	8-Amino-7-oxononanoate	Lipids	Fatty acyls	Fatty Acids and Conjugates	ko01100(Metabolic pathways);ko00780(Biotin metabolism);	-3.22979	-4.51443	1.28464	3518.25	3518.25	3518.25	3518.25	3518.25	3518.25	994.641	232.862	1141.88	305.009	632.185	800.925	9359.8	7514.31	6059.07	4174.54	6456.42	4969.54	13672.5	21430.3	12331.5	15823.2	14500.9	16118
M250T428_pos	S-Acetyldihydrolipoamide	Lipids	Fatty acyls	Fatty amides	-	-1.09346	-2.86635	1.77289	3794.14	3208.74	3712.81	3551.05	3507.36	3596.64	2031.28	2176.98	1920.58	1995.35	2032.8	2117.91	1083.02	4775.83	5722.98	2908.99	5460.76	6241.18	16953.1	15109.3	13883.9	14709.1	14838	14017.4
M327T140_neg	2,3-Dinor-8-iso_prostaglandin_F1alpha	Lipids	Fatty acyls	Eicosanoids	ko00590(Arachidonic acid metabolism);	-0.359705	1.92358	-2.28328	391124	391124	391124	391124	391124	391124	280595	752689	719654	754006	796790	817003	785116	903706	609159	911338	1.10393e+06	974329	139289	258155	111045	280782	138211	158743
M279T164_neg	Stearolic	Lipids	Fatty acyls	Fatty Acids and Conjugates	-	-0.927233	-5.76137	4.83414	30012.6	30012.6	30012.6	30012.6	30012.6	30012.6	2699.04	4465.85	3485.92	2957.67	2891.09	3098.15	14138.7	8411.32	3956.55	3855.9	3323.95	3581.1	105701	298784	114023	250166	140097	154272
M481T382_pos	Acevaltrate	Lipids	Fatty acyls	Fatty esters	-	-2.93437	-0.628132	-2.30623	3147.8	3147.8	3147.8	3147.8	3147.8	3147.8	1404.43	2058.26	1429.45	1193.55	1456.14	1670.54	10681.8	12712.7	13015.5	11146.6	11720.3	11144.3	2607.77	2229.15	3176.8	1545.31	2117.6	2561.65
M604T164_pos	1-O-Hexadecyl-2-(9Z-octadecenoyl)-sn-glycerol	Lipids	Glycerolipids	Diradylglycerols	-	-1.76633	-3.20979	1.44347	4643.53	4643.53	4643.53	4643.53	4643.53	4643.53	643.443	420.497	1849.35	940.858	1905.93	1756.99	17503.6	2146.27	1802.87	2278.43	667.762	1173.18	6414.29	13498.6	6603.77	18478.1	11467.9	13086.7
M573T32_pos	1-O-(1Z-Tetradecenyl)-2-(9Z-octadecenoyl)-sn-glycerol	Lipids	Glycerolipids	Diradylglycerols	-	-3.01175	-4.45018	1.43843	6783.98	6783.98	6783.98	6783.98	6783.98	6783.98	541.667	1268.61	875.659	708.208	527.474	854.664	35350	425.729	689.818	564.315	338.249	1154.56	6320.6	19656.7	11075.7	27730.3	19977.5	19645.8
M618T31_pos	1-Hexadecanoyl-2-(9Z-octadecenoyl)-sn-glycerol	Lipids	Glycerolipids	Diradylglycerols	-	-1.81063	-7.19282	5.38219	31327.8	31673.5	32956.2	31193.3	31998.7	31883.4	2016.65	611.67	718.266	510.813	365.698	305.086	13710	497.536	199.993	520.773	599.027	357.32	51219.9	157539	72120.8	164702	103257	113650
M341T42_neg	1-O-Octadec-9-enyl_glycerol	Lipids	Glycerolipids	Monoradylglycerols	-	2.24539	-2.58919	4.83458	1487.34	1536.44	1398.29	1747.24	1227.05	1616.18	873.963	491.631	1008.02	1184.45	1083.38	639.554	82.1122	285.399	168.972	234.864	274.977	67.4189	2199.81	9122.31	2903.41	7615.12	4721.87	5216.35
M303T444_pos	Tributyrin	Lipids	Glycerolipids	Triradylglycerols	-	-0.842972	-3.6695	2.82653	5577.57	5841.42	5115.18	5966.22	5431.62	5558.11	1041.9	2290.06	691.168	1076.2	916.052	1056.02	462.58	5315.17	1469.12	1641.84	2009.25	1786.3	16712.6	15806.5	12323	16043.9	15113.9	13977.7
M762T164_pos	1-Hexadecanoyl-2-(9Z-octadecenoyl)-sn-glycero-3-phosphocholine	Lipids	Glycerophospholipids	Glycerophosphocholines	-	-3.84923	-6.84748	2.99825	9388.81	8591.29	12788.9	8466.38	11985.2	9110.5	279.672	639.143	137.26	100.8	99.5381	85.0996	16063	875.564	354.217	1254	572.414	215.065	12521.2	38043.4	15491.6	40130.9	21654.8	26645.3
M753T259_neg	1-Hexadecanoyl-2-(9Z-octadecenoyl)-sn-glycero-3-pyrophosphate	Lipids	Glycerophospholipids	Glyceropyrophosphates	-	-1.97567	-3.02003	1.04435	936.665	1270.77	623.124	955.845	850.037	959.969	549.695	605.733	157.54	674.356	194.426	699.686	1423.45	1929.65	2289.32	2713.28	1066.7	1910.64	5236.18	2329.29	4354.39	3077.14	4190.31	4186.43
M409T206_neg	1-Palmitoylglycerol_3-phosphate	Lipids	Glycerophospholipids	Glycerophosphates	-	0.684104	-2.41226	3.09637	5747.11	5589.67	4494.78	5477.23	4603.65	5700.53	2669.98	3323.22	6843.29	4604.34	3889.91	3783.08	3870.73	2599.39	3421.99	1451.99	1247.29	3039.26	11270.9	25336	15578.3	29064.9	28580.9	23851.9
M561T192_pos	1-Oleoylglycerophosphocholine	Lipids	Glycerophospholipids	Glycerophosphocholines	-	-0.0514654	2.65653	-2.70799	2838.52	2425.89	2669.96	2344.4	2756.77	2602.05	5084.54	1113.85	5305.64	3316.09	4741.94	4394.39	2331.79	6414.42	5056.81	3841.41	3777.78	3404.28	478.525	1013.38	374.758	878.669	539.089	515.092
M504T162_pos	1-O-Hexadecyl-lyso-sn-glycero-3-phosphocholine	Lipids	Glycerophospholipids	Glycerophosphocholines	-	-1.06401	-5.53784	4.47384	6360.93	6360.93	6360.93	6360.93	6360.93	6360.93	386.076	306.481	295.061	89.0557	645.015	1075.8	3552.24	535.411	290.701	415.047	379.879	675.515	14403.6	32736.4	12003.7	29187.4	18096.2	23537.3
M117T319_neg	Methylmalonic acid	Lipids	Others	Fatty Acids and Conjugates	ko00240(Pyrimidine metabolism);ko00280(Valine, leucine and isoleucine degradation);ko00640(Propanoate metabolism);ko01100(Metabolic pathways);	-1.4	1.48702	-2.88702	42602.5	42602.5	42602.5	42602.5	42602.5	42602.5	45762.8	64931.7	48400.2	36049.7	34304.3	38906.7	134118	130798	125634	88227.3	106545	122873	22711.5	19171.1	14481.6	15241.7	11915.1	12214.8
M243T403_pos	2-Isopropylmalic acid	Lipids	Others	Fatty Acids and Conjugates	ko00290(Valine, leucine and isoleucine biosynthesis);ko00620(Pyruvate metabolism);ko01100(Metabolic pathways);ko01110(Biosynthesis of secondary metabolites);ko01210(2-Oxocarboxylic acid metabolism);ko01230(Biosynthesis of amino acids);	1.43478	-2.9839	4.41868	3398.35	3219.95	3479.21	3349.8	3355.39	3363.61	1303.42	1410.22	1610	1752.19	1694.29	1801.95	651.705	657.171	392.628	577.837	557.691	703.711	12132.6	12066	12695.4	13588.5	13008.2	12236.2
M779T165_pos	PC(16:0/16:0)； Phosphatidylcholine;Lecithin;Phosphatidyl-N-trimethylethanolamine;1,2-Diacyl-sn-glycero-3-phosphocholine;Choline phosphatide;3-sn-Phosphatidylcholine	Lipids	Phospholipids	Glycerophosphocholines	ko00564(Glycerophospholipid metabolism);ko00590(Arachidonic acid metabolism);ko00591(Linoleic acid metabolism);ko00592(alpha-Linolenic acid metabolism);ko01100(Metabolic pathways);ko01110(Biosynthesis of secondary metabolites);ko04723(Retrograde endocannabinoid signaling);ko05231(Choline metabolism in cancer);	-2.50469	-3.84687	1.34218	4296.79	4296.79	4296.79	4296.79	4296.79	4296.79	706.733	288.658	174.073	1793.8	627.212	319.822	17981.4	1139.22	744.772	1143.21	192.671	990.681	4511.51	13662.6	5542.46	12309.2	9463.87	10774.5
M501T34_pos	Farnesyl_triphosphate	Lipids	Prenol Lipids	Isoprenoids	-	-0.403008	1.6194	-2.02241	2947.25	2473.94	1899.52	3038.05	1397.91	3248.42	3405.27	5358.14	2816.61	6019.82	5878.7	7272.93	7146.16	6354.31	6626.83	7089.69	6475.03	6969.48	1454.34	1267.31	1559.39	1499.95	2253.84	1973.85
M557T260_pos	8-epi-11-Hydroxyiridodial_glucoside_pentaacetate	Lipids	Prenol Lipids	Isoprenoids	-	0.0207119	2.05035	-2.02964	15431.3	15071.7	13308.4	16761.1	14438.9	14722.7	18781.6	24333.1	21327.4	26551.7	23890.5	20665.6	21391.1	25002.1	21111.1	27255.1	17872	20986.4	12482.4	2344.07	3787.62	5600.1	3803.3	4707.64
M343T70_neg	Iridotrial_glucoside	Lipids	Prenol Lipids	Isoprenoids	-	-0.701846	-2.38967	1.68782	68401.8	106985	61742.1	116442	68771.8	80616.5	40363.3	76715.6	80558.2	61993.1	31360.2	76445.4	112914	90110.5	154425	80117.4	93053.2	67046.2	508692	147809	232586	349930	377918	308564
M581T333_pos	7-Epiloganin_tetraacetate	Lipids	Prenol Lipids	Isoprenoids	-	-1.45054	1.23775	-2.68829	1374.5	1374.5	1374.5	1374.5	1374.5	1374.5	1269.65	478.943	1096.34	880.746	1069.76	841.762	1564.52	2730.02	2944.92	2717.07	3124.48	2326.05	495.957	396.493	299.204	300.581	465.174	432.951
M399T231_pos	7-Epiloganic_acid	Lipids	Prenol lipids	Isoprenoids	-	-1.18488	1.33279	-2.51767	11746	8985.76	9006.5	9941.48	12389.6	8882.4	11353.6	11916.6	15205.6	11737.7	9908.29	11870.8	30100.7	46458.3	22688.4	23979.6	21492.7	18951.2	5917.17	3205.31	7011.58	4529.32	4658.17	3259.4
M271T256_pos	Abscisic_aldehyde	Lipids	Prenol Lipids	Isoprenoids	ko00906(Carotenoid biosynthesis);ko01110(Biosynthesis of secondary metabolites);ko01100(Metabolic pathways);	1.90732	3.60326	-1.69594	7420.18	9306.64	7173.75	7202.99	8052.02	7885.19	24209.8	36325.7	29246.3	36568.9	31799.2	31625.4	5723.96	8519.41	7076.21	10176.7	8592.86	10502.7	2549.84	2864.9	2675.96	2479.5	2294.61	2750.51
M279T167_neg	8'-Hydroxyabscisate	Lipids	Prenol lipids	Isoprenoids	ko00906(Carotenoid biosynthesis);	-2.08999	0.0927407	-2.18274	24906.5	24950.9	15872.5	21837	23902.2	20903.3	17331.2	17278.2	16399.4	17465.2	16211.1	14594.5	82468.3	69424.3	75894	62793.7	66931.5	65167.4	13109.2	19252.3	12605.8	20746.1	13792.9	13592
M465T93_pos	Abscisic acid glucose ester;Abscisic acid-beta-D-glucopyranosyl ester;beta-D-Glucopyranosyl abscisate	Lipids	Prenol lipids	Isoprenoids	ko00906(Carotenoid biosynthesis);ko01100(Metabolic pathways);ko01110(Biosynthesis of secondary metabolites);	-1.71574	2.79608	-4.51182	36708.3	34991.6	64052.7	40505.3	47708.9	39997.4	44518.4	16397.6	33680.6	33242.2	19264.6	2271.55	82803	105553	13406.3	73532	104578	110771	3558.96	3945.91	3595.16	2602.23	5037.31	2767.14
M311T37_neg	Phytanate	Lipids	Prenol Lipids	Isoprenoids	-	2.36105	0.460621	1.90043	13893.9	13893.9	13893.9	13893.9	13893.9	13893.9	21008.7	29579.6	26607.7	29703.7	27576.7	27530.4	8227.59	2584.43	4227.33	2864.23	9062.57	4568.44	14489.3	20616.9	16171.9	24050.2	21416.4	20981.4
M526T196_pos	Gibberellin	Lipids	Prenol lipids	Isoprenoids	-	-0.972489	2.3983	-3.37079	20002.2	17614.8	19619.9	19132.1	19133.2	19028.8	36755.2	32030.8	20672.2	15650.8	17390.4	18848.1	53263.6	61568.9	40586.1	32855.3	42396.7	46684.6	7673.54	3762.7	1957.53	3478.19	6767.19	3172.79
M721T185_pos	Azadirachtin_A	Lipids	Prenol Lipids	Isoprenoids	ko00996(Biosynthesis of various alkaloids);ko01062(Biosynthesis of terpenoids and steroids);	-4.77926	-1.87337	-2.9059	2095.5	2095.5	2095.5	2095.5	2095.5	2095.5	239.318	313.783	199.586	136.517	192.435	65.4752	6446.71	4691.49	5769.02	4030.81	4816.78	5745.03	788.682	499.341	598.102	645.315	879.842	791.594
M398T505_neg	4-Ketomyxol	Lipids	Prenol Lipids	Isoprenoids	-	-2.30246	0.925506	-3.22797	1554.61	1548.13	1275.97	1661.71	1464.88	1460.78	477.905	689.055	591.884	770.021	794.448	512.457	3565.29	3656.2	3224.54	3285.29	2993.34	2197.12	83.746	392.225	488.851	187.14	488.051	379.504
M560T38_neg	Ribosylhopane	Lipids	Prenol lipids	Hopanoids	-	-0.821457	-2.90038	2.07892	1092.8	1178.27	1315.28	1098.49	1200.39	1175.87	264.512	141.192	386.45	312.179	453.092	175.078	212.491	846.491	707.62	43.5474	544.264	707.247	1697.29	2041.7	1917.57	2309.75	2684.03	2284.93
M731T345_pos	Bacteriohopanetetrol	Lipids	Prenol lipids	Hopanoids	-	0.0672772	-2.01176	2.07903	2264.84	3076.27	1521.88	2264.27	2219.96	2243.5	2235.73	2220.6	2249.58	2097.13	2122.67	1621.01	2200.95	3509.49	1751.4	1420.31	2089.14	1003.77	9506.32	9242.84	9490.44	9226.85	8565.53	4565.49
M347T221_neg	Verbascoside	Lipids	Prenol lipids	Others	-	7.176	3.57266	3.60334	253530	283517	249840	260234	252350	267266	363465	366345	335698	399385	364459	362819	2335.12	2485.17	2701.85	2789.09	2440.66	2407.53	5047.6	50498.8	7276.92	57144.3	31300.8	32976.8
M525T31_2_pos	Retinyl_palmitate	Lipids	Prenol Lipids	Retinoids	ko00830(Retinol metabolism);ko01100(Metabolic pathways);	-0.808308	-5.8053	4.99699	1284.78	1203.67	1981.1	1204.27	1439.8	1425.18	352.238	34.6538	15.3174	74.6639	75.8476	67.8075	876.907	13.335	14.1032	93.1355	47.8263	41.3366	2101.96	7250.14	4722.98	10915.3	4549.12	5160.63
M207T128_pos	Plastoquinol-1	Lipids	Prenol Lipids	Ubiquinones	ko00195(Photosynthesis);ko01100(Metabolic pathways);	-0.836289	2.42224	-3.25853	913641	925471	907659	915727	914969	916276	1.46828e+06	139162	426054	191909	1.60346e+06	681549	1.02845e+06	1.32179e+06	1.4131e+06	1.43378e+06	1.42055e+06	1.43547e+06	116431	90275.9	130660	213421	143204	147503
M623T499_neg	UDP-N-acetyl-alpha-D-glucosamine	Lipids	Saccharolipids	Monoacylaminosugars	ko01502(Vancomycin resistance);ko01100(Metabolic pathways);ko00520(Amino sugar and nucleotide sugar metabolism);	2.84512	-1.42556	4.27069	3167.26	3167.26	3167.26	3167.26	3167.26	3167.26	5428.63	5803.48	4415.79	7032.76	3413.31	2746.18	2149.52	698.632	323.973	103.396	149.717	588.324	14931.3	13501.5	9488.07	10502	9803.71	19243.7
M318T162_pos	Phytosphingosine	Lipids	Sphingolipids	4-Hydroxysphinganines (Phytosphingosines)	ko00600(Sphingolipid metabolism);ko01100(Metabolic pathways);	-5.40238	-4.80674	-0.595635	18251.2	18251.2	18251.2	18251.2	18251.2	18251.2	545.23	1137.62	1009.54	1263.6	1770.32	1295.77	135774	35451.4	31284.2	31316.2	37439.2	25725.9	22188	40643	26898.4	36072.6	33455.3	37277.3
M421T45_pos	2-Methoxyestradiol-17beta_3-sulfate	Lipids	Sterol Lipids	C18 steroids (estrogens) and derivatives	ko00140(Steroid hormone biosynthesis);	-1.76045	1.43487	-3.19532	81605.6	81605.6	81605.6	81605.6	81605.6	81605.6	89272.3	74588.8	64555.3	68605.8	70778.5	81670.6	150312	254418	273020	272548	287566	284959	33418.1	30803	26906.2	26958.3	23974.4	24190.9
M485T301_pos	Estrone_glucuronide	Lipids	Sterol Lipids	C18 steroids (estrogens) and derivatives	ko00140(Steroid hormone biosynthesis);	0.19798	-3.60513	3.80311	9948.15	9761.39	9420.88	11214.1	9330.23	9896.79	1585.43	1015.96	1162.31	978.337	974.12	1056.81	359.018	649.865	1979.14	1156.86	1009.79	749.788	14104.7	13427.5	13283	14150.5	13921.7	13532.5
M546T45_pos	17beta-Estradiol_3-sulfate-17-(beta-D-glucuronide)	Lipids	Sterol Lipids	C18 steroids (estrogens) and derivatives	-	-0.752039	-2.51792	1.76588	10307.8	7719.59	10393.3	8975.61	10153.7	9021.52	3625.44	5883.92	4763.32	5960.52	5217.11	3903.5	715.794	10495.1	10328.9	9554.75	10146.7	8195.6	35347.2	32454	30879.5	27294.8	22239.9	19910
M505T224_pos	Androsterone_glucuronide	Lipids	Sterol Lipids	C19 steroids (androgens) and derivatives	ko00140(Steroid hormone biosynthesis);ko01100(Metabolic pathways);	-0.598621	2.4675	-3.06612	15320.9	15320.9	15320.9	15320.9	15320.9	15320.9	18670.7	12748.3	17404.1	14392	20232.9	22335.9	8383.08	11299.6	21395.2	25450.6	50157.4	43499.4	2008.92	2522.52	1744.42	5021.73	3955.86	3872.71
M481T179_pos	Cortisol_21-sulfate	Lipids	Sterol Lipids	C21 steroids (gluco/mineralocorticoids, progestogens) and derivatives	-	2.27849	2.12187	0.156625	5697.52	5697.52	5697.52	5697.52	5697.52	5697.52	9843.43	9214.89	10840.3	5770.3	5435.71	6265.98	1708.1	2262.44	1624.43	1222.21	1057.83	1888.69	1977.93	1263.04	2818.56	1602.19	1365.63	1856.03
M527T212_pos	Hydrocortisone_butyrate_propionate	Lipids	Sterol Lipids	C21 steroids (gluco/mineralocorticoids, progestogens) and derivatives	-	1.6016	4.02778	-2.42619	18717.5	20280.5	15685.1	19352	18205.5	18263.6	40492.2	32386.5	35633.9	28903.2	54334.3	28641.3	11113.8	16027.4	12453.8	10349	11286.2	11391.3	3314.2	2058.59	1830.76	1422.36	1810.3	3075.52
M501T201_pos	Hydrocortisone_succinate	Lipids	Sterol Lipids	C21 steroids (gluco/mineralocorticoids, progestogens) and derivatives	-	-1.57935	0.751433	-2.33078	5955.94	5955.94	5955.94	5955.94	5955.94	5955.94	7990.5	5489.97	9417.86	5175.22	6016.95	4339.98	25197.7	25029.6	18861.7	13133.9	16418.8	16202.2	4512.75	5948.81	2960.71	3378.35	2634.3	3393.3
M443T231_pos	Cortisol_21-acetate	Lipids	Sterol Lipids	C21 steroids (gluco/mineralocorticoids, progestogens) and derivatives	-	0.73172	2.53895	-1.80723	9963.66	15602	8120.78	11348.8	11199.7	10742.9	27510	24123.3	16399	7388.26	15893.1	16191.8	17161.5	13743.3	7100.41	6444.31	7199.7	13088.9	4726.81	3743.2	2634.35	2530.17	2134.16	2729.54
M405T475_pos	Urocortisol; Tetrahydrocortisol; 5beta-Pregnane-3alpha,11beta,17alpha,21-tetrol-20-one	Lipids	Sterol Lipids	C21 steroids (gluco/mineralocorticoids, progestogens) and derivatives	ko00140(Steroid hormone biosynthesis);	-1.17211	-2.35921	1.1871	1255.29	1292.85	1223.15	1262.09	1258.87	1257.76	1458.89	1155.53	866.985	839.477	824.065	736.839	2041.42	2150.9	2264.78	1927.58	2734.85	2134.55	4602.83	5336.58	5212.23	4851.35	4500.2	5675.68
M554T428_pos	Ciliatocholate	Lipids	Sterol Lipids	C26 bile acids, alcohols, and derivatives	ko00440(Phosphonate and phosphinate metabolism);	-2.27783	-5.04855	2.77071	697.445	693.432	902.847	631.982	809.121	725.403	191.27	38.1359	101.025	57.5466	74.3736	50.0615	348.545	534.147	497.059	212.557	449.066	443.564	3015.51	3150.34	2731.42	2479.4	2937.17	2644.53
M564T130_pos	Taurolithocholate_sulfate	Lipids	Sterol Lipids	C26 bile acids, alcohols, and derivatives	ko04976(Bile secretion);	-0.286663	3.07514	-3.3618	4776.51	4776.51	4776.51	4776.51	4776.51	4776.51	7876.67	5630.04	7610.69	3455.62	9019.74	4707.82	17560	7618.76	946.84	4701.79	4513.08	11379.2	813.691	1215.61	789.327	503.526	510.55	711.899
M549T261_neg	Sulfoglycolithocholate	Lipids	Sterol Lipids	C26 bile acids, alcohols, and derivatives	-	2.97219	3.83931	-0.867125	3576.47	4539.35	4022.3	3938.7	4167.27	3927.29	7956.43	8233.12	7832.32	6949.17	7766.62	8918.05	746.345	482.048	1154.54	1257.54	1056.55	1375.89	463.405	571.729	438.321	659.962	682.482	513.506
M458T34_neg	4alpha-Methylzymosterol-4-carboxylate	Lipids	Sterol lipids	Cholesterol and derivatives	ko00100(Steroid biosynthesis);ko01100(Metabolic pathways);	-1.27974	-6.85764	5.5779	1849.69	1343.9	932.24	1460.68	1172.36	1472.03	99.5386	96.3147	79.4143	28.8362	38.0611	121.301	326.632	156.305	132.417	125.99	220.452	163.474	4604.31	13431.9	5355.91	13436.9	9141.88	7778.39
M363T451_pos	Thyrotropin-releasing_hormone	Lipids	Sterol lipids	Steroids and steroid derivatives	-	-0.797261	-2.90828	2.11102	1667.86	1667.86	1667.86	1667.86	1667.86	1667.86	595.993	784.812	722.03	730.329	719.318	890.458	1197.69	1267.95	1139.36	1142.58	1272.73	1700.62	4992.78	5577.99	5769.82	5406.81	5459.83	6147.03
M433T229_neg	Flunisolide	Lipids	Sterol lipids	Steroids and steroid derivatives	-	1.36671	2.31736	-0.950645	5073.39	8018.56	6335.33	6486.66	6119.69	6391.03	14859.4	11818.1	15414.4	15524	11738.2	13309.1	5565.48	6963.5	5594.73	5156.5	3387.4	5387.04	2492.86	2130.01	2814.61	3325.39	3199.41	2622.83
M426T331_neg	Cefoxitin	Lipids	Sterol lipids	Steroids and steroid derivatives	-	2.1079	-0.738383	2.84628	1401.35	1401.35	1401.35	1401.35	1401.35	1401.35	738.297	762.683	1258.09	872.44	757.24	826.192	166.959	167.686	342.278	305.597	71.9422	155.327	1640.17	1378.49	2278.19	981.232	1099.83	1322.2
M574T460_neg	7,8-Dihydro-7-hydroxy-8-S-glutathionyl-benzo[a]pyrene	Lipids	Sterol lipids	Steroids and steroid derivatives	ko05204(Chemical carcinogenesis - DNA adducts);ko00980(Metabolism of xenobiotics by cytochrome P450);	-0.474877	-2.8715	2.39662	1235.66	743.722	921.116	853.383	1016.71	933.284	660.374	563.599	732.583	438.525	751.06	456.224	854.373	1037.51	994.914	1008.64	815.9	295.228	4360.77	4080.35	3860.98	4062.87	4290.57	5707.47
M453T35_pos	Eplerenone	Lipids	Sterol lipids	Steroids and steroid derivatives	-	-0.0128795	-2.27056	2.25768	2841.03	2841.03	2841.03	2841.03	2841.03	2841.03	982.275	2868.79	2280.98	3886.18	1361.45	3159.89	7826.1	1206.62	1571.64	1363.21	1398.97	1303.39	9644.15	10594.7	14135.5	13787.8	10338.5	11654.2
M395T172_neg	3beta-Hydroxypregn-5-en-20-one sulfate; Pregnenolone sulfate	Lipids	Sterol lipids	Sulfates	ko00140(Steroid hormone biosynthesis);ko01100(Metabolic pathways);	-4.11827	-1.07784	-3.04043	6539.98	6539.98	6539.98	6539.98	6539.98	6539.98	1348.41	1493.3	1577.58	749.244	1269.59	1370.93	29457.5	25735.2	26097.8	18527.9	18080	17720.6	2379.28	3388.01	2416.56	3213.52	2329.16	2757.34
M134T162_neg	Adenine	Nucleic acids	Bases	Purines	ko00908(Zeatin biosynthesis);ko01100(Metabolic pathways);ko00230(Purine metabolism);	-2.75294	-0.774204	-1.97874	229579	316845	263502	289414	256700	270135	120744	127620	123312	129172	138011	138046	713583	864974	754174	866168	1.18582e+06	852318	193374	185931	211672	210317	251226	276179
M111T161_neg	Uracil	Nucleic acids	Bases	Pyrimidines	ko01100(Metabolic pathways);ko00240(Pyrimidine metabolism);ko00770(Pantothenate and CoA biosynthesis);ko00410(beta-Alanine metabolism);	-1.93927	-3.17708	1.23781	32064.2	33118.3	31016	32009.4	32186.4	32061.7	14534.4	15998.7	18074.7	16398	26053.8	11894.2	61670.6	61588.7	68904.9	66382.8	59779.7	76512.2	155120	138086	166788	143786	161503	165907
M112T199_pos	Cytosine	Nucleic acids	Bases	Pyrimidines	ko00240(Pyrimidine metabolism);ko01100(Metabolic pathways);	-1.92644	-2.20613	0.279691	6638.87	6432.12	6574.13	6545.57	6560.3	6545.85	6826.74	4597.24	5142.56	4383.21	4316.07	4991.24	27552.4	28510.5	14961.7	10288	19464.9	14234.5	18614.9	18974.2	23060.8	31326.1	14517.3	33123.9
M321T409_neg	2',3'-Cyclic_CMP	Nucleic acids	Cyclic nucleotides	2',3'-Cyclic nucleotides	ko00240(Pyrimidine metabolism);	-2.27052	0.732803	-3.00332	98753.1	138169	85319.1	98619	126909	96649.3	60277.1	54467	63591.3	61101.1	80825.2	69500.4	418367	251598	257543	342091	321426	289558	34185	34563.6	37865.2	42262	40343.2	45313.8
M321T438_neg	3',5'-Cyclic_CMP;Cytidine 3',5'-cyclic monophosphate	Nucleic acids	Cyclic nucleotides	3',5'-Cyclic nuclcleotides	-	-2.56891	1.17055	-3.73946	29109.1	31893.2	28201.4	29517	29763.7	29728.7	21748.2	27862.3	23129	20311.7	18685.1	20011.6	119917	118646	143578	125762	104295	169542	8501.34	9103.86	10170	8878.86	10040.4	11834.8
M268T173_pos	Deoxyguanosine	Nucleic acids	Nucleosides	Deoxyribonucleosides	ko01100(Metabolic pathways);ko00230(Purine metabolism);	-7.79109	-9.34323	1.55214	2.01729e+06	1.99598e+06	1.79093e+06	2.17272e+06	1.89104e+06	1.96163e+06	20934.5	12740.7	17516.7	12073.7	15760.5	10938.6	2.66537e+06	3.79359e+06	3.7081e+06	3.26408e+06	3.26833e+06	3.22671e+06	1.07622e+07	8.65245e+06	1.16136e+07	8.06119e+06	9.77923e+06	9.56528e+06
M266T174_neg	Adenosine	Nucleic acids	Nucleosides	Ribonucleosides	ko01100(Metabolic pathways);ko00230(Purine metabolism);	-3.8838	-7.30263	3.41883	31781.5	30843.6	30246.7	31734.6	28807	32203.6	2726.31	3117.66	1506.47	2258.74	1472.11	2901.04	37913.8	36318.1	35800.3	33134.6	31772.1	31466	424006	340896	417203	332770	347813	344754
M282T267_neg	Guanosine	Nucleic acids	Nucleosides	Ribonucleosides	ko01100(Metabolic pathways);ko00230(Purine metabolism);	-1.77461	-2.4661	0.691487	47752.6	49156.8	45106	47854.1	45820.4	48267.3	19455.8	26032.2	23154.7	27262	20096.7	23871.3	74353.9	63206.8	99636.9	65177.3	96685.7	79506.9	122844	116956	129588	132218	132684	138571
M242T244_neg	Cytidine	Nucleic acids	Nucleosides	Ribonucleosides	ko00240(Pyrimidine metabolism);ko01100(Metabolic pathways);	0.37738	-2.54325	2.92063	4085.51	4085.51	4085.51	4085.51	4085.51	4085.51	2298.64	3340.15	2612.45	3234.73	4603.08	2747.04	2115.18	2365.79	2435.37	2480.11	2961.62	2142.59	22245	18346.6	17785	14770.9	17897.4	18750.8
M243T160_neg	Uridine	Nucleic acids	Nucleosides	Ribonucleosides	ko00240(Pyrimidine metabolism);ko01100(Metabolic pathways);	-1.77144	-3.22402	1.45259	283005	281578	246169	266792	278079	268125	132174	139276	121032	132712	129743	135011	463240	439215	495770	420937	437798	439876	1.35025e+06	1.09037e+06	1.42531e+06	1.31943e+06	1.2657e+06	930132
M425T471_pos	dTDP	Nucleic acids	Nucleotides	Deoxyribonucleotides	ko01100(Metabolic pathways);ko00240(Pyrimidine metabolism);	-2.90871	1.38033	-4.28904	2135.92	1045.22	1180.62	1175.28	1571.52	1353.64	751.109	903.156	945.494	1243.65	704.742	1537.9	4858.78	6282.24	8915.55	9118.44	7008.62	9519.46	334.232	535.056	415.527	466.739	304.041	282.255
M490T506_pos	dCTP	Nucleic acids	Nucleotides	Deoxyribonucleotides	ko00240(Pyrimidine metabolism);ko01100(Metabolic pathways);	-2.36827	1.93437	-4.30264	761.924	669.971	904.224	703.622	834.604	736.346	283.783	388.546	393.846	396.13	290.457	326.407	1134.48	1955.85	1663.88	2081.87	2057.17	1841.97	118.563	58.1137	140.92	67.4569	83.8229	75.1088
M340T264_pos	dTMP;Thymidine 5'-phosphate;Deoxythymidine 5'-phosphate;Thymidylic acid;5'-Thymidylic acid;Thymidine monophosphate;Deoxythymidylic acid;Thymidylate	Nucleic acids	Nucleotides	Deoxyribonucleotides	ko00240(Pyrimidine metabolism);ko01100(Metabolic pathways);	0.755938	2.46199	-1.70605	5074.43	4937.63	4427.22	6137.67	4262.88	5116.62	16833.4	19237.7	22066.6	20514.8	24280	18642.4	9621.66	12008.8	10948	15712.4	10776.8	12924.4	3712.51	3243.25	3787.82	3440.14	3875.55	4006.08
M364T304_pos	GMP;Guanosine 5'-phosphate;Guanosine monophosphate;Guanosine 5'-monophosphate;Guanylic acid	Nucleic acids	Nucleotides	Ribonucleotides	ko01100(Metabolic pathways);ko00230(Purine metabolism);ko01060(Biosynthesis of plant secondary metabolites);	0.390723	-2.06891	2.45963	9118.54	7892.78	7257.62	5904.27	9227.76	7707.13	17811.2	22676.2	24269.1	20591.4	9960.35	12482.5	6989.22	22866.1	12303.6	27654.1	8761.49	3642.64	64893.7	68646.3	103525	76512.6	72609.4	66071.2
M444T337_pos	GDP;Guanosine 5'-diphosphate;Guanosine diphosphate	Nucleic acids	Nucleotides	Ribonucleotides	ko01100(Metabolic pathways);ko00230(Purine metabolism);RNA transport;ko04144(Endocytosis);	-1.38413	2.94522	-4.32935	5198.14	3784.09	4633.56	4899.32	5027.41	4271.02	6283.44	4125.28	4421.38	4095.48	3679.33	3891.18	15044.3	13997.5	11914.5	11311	7025.92	9865.34	480.523	558.14	532.069	707.836	606.12	555.5
M426T469_pos	CDP;Cytidine 5'-diphosphate;Cytidine diphosphate	Nucleic acids	Nucleotides	Ribonucleotides	ko00240(Pyrimidine metabolism);ko01100(Metabolic pathways);	-3.32454	4.6449	-7.96944	6439.16	6439.16	6439.16	6439.16	6439.16	6439.16	2714.05	4365.35	3998.92	4485.05	3829.14	4474.55	24865.3	39654	50583	44152.2	53275.4	26574.1	147.745	191.586	153.994	139.092	185.691	135.885
M446T337_pos	UDP;Uridine 5'-diphosphate	Nucleic acids	Nucleotides	Ribonucleotides	ko00240(Pyrimidine metabolism);ko01100(Metabolic pathways);ko00908(Zeatin biosynthesis);	-1.49974	3.00107	-4.50082	3433.67	3089.15	3557.51	3397.37	3330.33	3356.82	2006.2	2919.39	2998.07	2175.58	2532.92	3028.39	9916.76	9319.22	4184.03	7176.91	5885.3	7804.54	316.938	168.113	352.911	273.446	403.69	441.012
M173T361_neg	2-Oxopimelate;alpha-Ketopimelate;2-Oxoheptanedionic acid	Organic acids	Carboxylic acids	2-Oxocarboxylic acids	ko01210(2-Oxocarboxylic acid metabolism);	1.29697	2.45959	-1.16262	43079.1	42775.2	50265.8	42318.9	43412.6	45840.3	88656.5	83214.5	91726.3	77553.4	83179.2	78454.2	27735.9	27926.2	55535.6	25099.7	45110.8	23215.2	13002.6	13718	14271.6	21553.7	13470.6	15389
M159T179_neg	2-Oxoadipate	Organic acids	Carboxylic acids	2-Oxocarboxylic acids	ko01210(2-Oxocarboxylic acid metabolism);ko01230(Biosynthesis of amino acids);ko00300(Lysine biosynthesis);ko00310(Lysine degradation);ko00380(Tryptophan metabolism);ko01100(Metabolic pathways);	-2.14504	0.502897	-2.64794	36093.6	48937.9	43017.9	40917.7	41249.5	42472.9	29046.5	26467.1	30254.7	30747.8	29076.9	27744.2	126417	130778	138311	121423	128902	120850	18834.1	17052.7	20712.5	25209	19947	20566.7
M129T44_neg	ketoisocaproic acid	Organic acids	Carboxylic acids	2-Oxocarboxylic acids	ko00280(Valine, leucine and isoleucine degradation);ko00290(Valine, leucine and isoleucine biosynthesis);ko00785(Lipoic acid metabolism);ko00966(Glucosinolate biosynthesis);ko01100(Metabolic pathways);ko01110(Biosynthesis of secondary metabolites);ko01210(2-Oxocarboxylic acid metabolism);ko01230(Biosynthesis of amino acids);	-0.054365	-6.25921	6.20484	47325.5	47325.5	47325.5	47325.5	47325.5	47325.5	4289.03	4698	4739.24	2970.15	3858.69	3674.48	5400.49	4562.13	3332.68	3845.77	3778.12	4240.86	397346	246419	373415	212600	238883	387239
M101T255_neg	Acetoacetate	Organic acids	Carboxylic acids	3-Oxocarboxylic acids	ko00280(Valine, leucine and isoleucine degradation);ko00310(Lysine degradation);ko00350(Tyrosine metabolism);ko00643(Styrene degradation);ko00650(Butanoate metabolism);ko01100(Metabolic pathways);ko01120(Microbial metabolism in diverse environments);ko02020(Two-component system);	-1.41874	1.60479	-3.02353	54702.8	49049	52717.6	26749.8	59991.3	49692.4	33048.6	38715.5	34758.6	43134.4	40386.1	33677	137988	128892	64154.9	76251.2	125075	65757.6	18647.5	19074.2	7860.53	10009.2	9870.33	8093.73
M113T255_neg	Glutarate	Organic acids	Carboxylic acids	Dicarboxylic acids	ko00071(Fatty acid degradation);ko00310(Lysine degradation);	-1.65515	1.16034	-2.81549	203293	211489	220443	193055	217738	208028	157375	152943	134622	76302.5	135565	151602	552665	317917	245758	572977	282455	574362	60314.9	59511.8	51901.1	59011.7	68907.9	62041.9
M117T387_neg	Succinate	Organic acids	Carboxylic acids	Dicarboxylic acids	ko00640(Propanoate metabolism);ko00360(Phenylalanine metabolism);ko00350(Tyrosine metabolism);ko01110(Biosynthesis of secondary metabolites);ko00190(Oxidative phosphorylation);ko00020(Citrate cycle (TCA cycle));ko00760(Nicotinate and nicotinamide metabolism);ko00920(Sulfur metabolism);ko01200(Carbon metabolism);ko01070(Biosynthesis of plant hormones);ko01100(Metabolic pathways);ko00250(Alanine, a…	-0.505999	-2.15331	1.64731	20340.6	22211.1	21010.5	20664.1	20626.4	21432	11423	18953.1	14952	15375.1	15727.3	16466.1	24494.6	21453.5	21036.6	18765.9	22324.1	23848.6	69003.2	62280.7	76013.6	65358.6	69253.4	71339.3
M173T246_neg	Suberic_acid	Organic acids	Carboxylic acids	Dicarboxylic acids	-	-2.69351	2.33363	-5.02713	18330.4	18330.4	18330.4	18330.4	18330.4	18330.4	12771.3	5635.68	11747.7	15915.5	16329.9	15769.6	67959	55168.2	97829	71119.6	109320	104273	1863.19	2325.9	2241.84	3464.3	2776.33	2836.13
M215T491_pos	Citrate	Organic acids	Carboxylic acids	Tricarboxylic acids	ko00630(Glyoxylate and dicarboxylate metabolism);ko00020(Citrate cycle (TCA cycle));ko01110(Biosynthesis of secondary metabolites);ko01060(Biosynthesis of plant secondary metabolites);ko01070(Biosynthesis of plant hormones);ko01230(Biosynthesis of amino acids);ko00250(Alanine, aspartate and glutamate metabolism);ko01210(2-Oxocarboxylic acid metabolism);ko01100(Metabolic pathways);ko01200(Carbon m…	-1.45834	0.685478	-2.14381	53773.4	86618.1	50266.1	65415.7	62202.6	61500.9	97953.6	98133.4	65496.4	74556.9	57617.9	66155.7	208633	295339	147143	251576	179475	181638	68620.1	51529.6	47111.7	39517.4	42247.7	36947.9
M173T433_neg	cis-Aconitate	Organic acids	Carboxylic acids	Tricarboxylic acids	ko01100(Metabolic pathways);ko01060(Biosynthesis of plant secondary metabolites);ko01070(Biosynthesis of plant hormones);ko00630(Glyoxylate and dicarboxylate metabolism);ko00660(C5-Branched dibasic acid metabolism);ko01110(Biosynthesis of secondary metabolites);ko00020(Citrate cycle (TCA cycle));ko01210(2-Oxocarboxylic acid metabolism);	-0.495129	-2.01905	1.52392	41658.6	41658.6	41658.6	41658.6	41658.6	41658.6	21663.1	27859.1	24075.8	27253.4	25984	27199.8	30093.9	32056.3	39020.3	38671.6	43096.4	34166.1	97966.2	102337	116502	109142	88431.1	109953
M101T259_pos	Succinic_anhydride	Organic acids	Organic acids	Others	-	-0.954025	1.4966	-2.45063	18062.5	18062.5	18062.5	18062.5	18062.5	18062.5	15373.6	15712	12356.8	14918	17796.9	15912	22367.6	41600	19823.2	28512.2	38594.4	27465.5	6216.33	6172.21	2955.96	5194.96	5732.49	6356.23
M136T263_pos	Oxomalonate	Organic acids	Organic acids	Others	-	-1.22876	1.52679	-2.75556	28793	33783.6	30156.6	30967.1	30768.1	30775.7	18935.9	18868.2	11521.2	19609.5	16754.2	32805.5	34774.8	63545.3	28817.3	35003.5	44922.1	70647.5	10593.9	6016.76	566.954	6412.44	8514.19	9018.99
M147T400_1_neg	Citramalic acid	Organic acids	Organic acids	Others	-	-1.10798	-2.29394	1.18596	77773.3	87313.5	77410.2	82874	62225.1	92270.4	36722.5	34752.9	49343	37843.1	35485	38885.1	80179.9	70294.7	92588.9	74408.9	92448.6	92362.9	175815	155604	222239	161435	213114	214562
M191T191_neg	Quinate;Quinic acid;Kinic acid;Chinic acid;L-Quinic acid;L-Quinate;(-)-Quinic acid	Organic acids	Organic acids	Others	ko00400(Phenylalanine, tyrosine and tryptophan biosynthesis);	1.82105	2.6184	-0.79735	240746	207107	223336	220938	226774	222768	351266	358559	423180	450314	390974	405178	112322	131694	122869	104563	103408	98568.9	58290.4	66562.3	67492.9	70194.4	63727.2	61225.4
M337T373_neg	p-Coumaroyl_quinic_acid	Organic acids	Organic acids	Others	ko00940(Phenylpropanoid biosynthesis);ko00941(Flavonoid biosynthesis);ko00945(Stilbenoid, diarylheptanoid and gingerol biosynthesis);ko01110(Biosynthesis of secondary metabolites);	-1.73334	1.57836	-3.31171	20475.7	17336.9	21151.9	19952.1	19933.7	19346.3	27844.4	37007.4	44270.4	35006.1	40112.6	30865.7	83025.1	102572	195001	110390	135206	89029.7	10392.5	12436.8	10551.1	10787.7	11737.7	16125.1
M203T89_pos	alpha-Amylcinnamaldehyde	Phenylpropanoids	Cinnamic acids and derivatives	Others	-	0.392997	2.48264	-2.08964	35714.3	36778.5	48875.1	18661.2	45753	37548.4	65840.8	61889.2	77033.4	69989.5	68968.8	61345.8	116931	17509.8	72882.1	66313.7	17489.3	17351.2	18871.9	8436.47	4489.64	18381.3	4962.31	17331.9
M322T448_pos	Avenanthramide	Phenylpropanoids	Cinnamic acids and derivatives	Others	-	0.0586923	-4.50245	4.56114	1294.58	1294.58	1294.58	1294.58	1294.58	1294.58	594.75	865.869	703.801	550.787	423.949	424.513	940.048	1007.43	254.142	280.582	440.509	498.884	20988.9	15592.9	16865	8033.18	8929.99	10363.6
M926T519_neg	Carthamin	Phenylpropanoids	Cinnamic acids and derivatives	Others	-	1.91063	-2.5314	4.44203	2320.59	2470.12	2627.27	2010.51	2586.2	2407.67	2373.29	3227.68	3434.28	4822.18	3931.83	3758.89	579.148	797.935	1422.63	800.54	970.593	1160.46	15453	23956.4	20125.3	19552.7	24058.7	21430.4
M304T31_neg	Entacapone	Phenylpropanoids	Cinnamic acids and derivatives	Others	-	-1.19171	1.99021	-3.18192	14055.6	16151.5	13689	15712.7	14400.6	14682.8	13931.8	16772.5	14297.3	15692.2	17343.8	11888.8	34602.4	36268.6	33776.8	29572.8	34071.9	37119.6	3041.93	3437.27	3782.4	4805.63	4171.97	3395.41
M341T320_neg	1-Caffeoyl-beta-D-glucose	Phenylpropanoids	Cinnamic acids and derivatives	Others	-	0.969844	2.54384	-1.574	38961.9	37153.3	48393.6	40153.8	40563.2	40989.1	76088.2	72586.9	55827	59943.2	73691.9	82774.9	38180.2	37192.4	37515.3	28957	31896.2	41160.5	11027.8	12861.5	9739.15	13441.8	12556.1	12553.8
M199T472_pos	Bergapten	Phenylpropanoids	Coumarins	Furanocoumarins	ko01110(Biosynthesis of secondary metabolites);	-0.785396	1.2771	-2.06249	2318.49	2481.6	2712.28	2041.79	2580.52	2448.32	2127.11	1806.29	2022.59	3238.64	3048.04	2276.47	3505.07	4774.32	4286.07	4073.29	3474.2	4911.72	1047.55	995.513	1127.68	926.072	943.639	950.493
M391T468_pos	Daphnoretin	Phenylpropanoids	Coumarins and derivatives	Coumarins	-	-2.35927	2.01695	-4.37622	1099.23	1196.19	1723.1	1129.31	1290.51	1291.66	737.473	1026.82	1029.51	1247.67	1108.24	1335.92	5161.3	5509.15	6558.66	5295.98	5442.6	5310.7	168.777	233.226	389.493	164.701	312.818	333.454
M175T59_neg	Herniarin; 7-Methoxycoumarin	Phenylpropanoids	Coumarins and derivatives	Coumarins	-	-2.31184	-0.390096	-1.92175	154094	168915	144473	215899	144162	160613	114356	102045	89795.6	81964	84447.1	78939.1	586967	472281	414740	427373	381082	456080	126812	125538	115176	122398	116717	116151
M235T44_neg	5,6,7-Trimethoxycoumarin	Phenylpropanoids	Coumarins and derivatives	Coumarins	-	-2.54399	0.0503826	-2.59438	26078.6	21073.2	21892.9	17796.5	24550.9	22575.3	14414.7	16166.2	13816.9	10850.2	3244.94	13236.3	68832.8	78893.5	70231.9	66006.4	65801.8	68558.5	14500.6	13823.2	13762	2928.47	13421.6	10831.5
M352T201_neg	Dicumarol	Phenylpropanoids	Coumarins and derivatives	Coumarins	-	2.12608	1.18746	0.938626	3932.1	2916.55	3751.34	3584.02	3558.72	3484.56	6749.61	5842.04	4963.68	3940.08	5476.21	3523.05	745.159	2167.51	906.294	599.287	830.393	1737.04	2472.97	2209.59	1953.9	2021.82	2044.63	2686.56
M166T274_pos	Dihydrocoumarin	Phenylpropanoids	Coumarins and derivatives	Dihydrocoumarin	ko00624(Polycyclic aromatic hydrocarbon degradation);ko00999(Biosynthesis of various plant secondary metabolites);ko01120(Microbial metabolism in diverse environments);	0.206976	-4.41644	4.62341	60660.1	57304	58921.6	55294.1	60325.7	58490.5	8967.18	13459.8	8160.35	13014.7	10622.3	10500.6	3842.11	9672.89	9832.34	10065.3	10922.7	11739.2	235710	219973	248496	211255	222754	243950
M255T506_pos	Xanthotoxin	Phenylpropanoids	Coumarins and derivatives	Furanocoumarins	ko00999(Biosynthesis of various plant secondary metabolites);ko01110(Biosynthesis of secondary metabolites);	-1.54282	1.49467	-3.03748	597.559	874.549	767.567	718.566	751.103	718.694	487.016	540.407	466.229	508.256	373.308	502.198	1346.56	1267.03	1438.37	1555.83	1252.25	1523.68	182.595	121.623	278.83	226.417	130.203	81.4171
M201T28_neg	Bergaptol	Phenylpropanoids	Coumarins and derivatives	Furanocoumarins	ko00999(Biosynthesis of various plant secondary metabolites);ko01061(Biosynthesis of phenylpropanoids);ko01110(Biosynthesis of secondary metabolites);	0.848727	4.08483	-3.2361	803547	891989	882017	902005	810421	876925	1.29407e+06	1.78633e+06	1.34907e+06	1.8135e+06	1.61027e+06	1.63421e+06	983229	870537	852178	860696	903025	798476	101414	95638.2	91457.4	94214.9	90606.1	85773.6
M357T42_pos	Rutamarin	Phenylpropanoids	Coumarins and derivatives	Furanocoumarins	-	0.0811826	3.52217	-3.44099	7395.07	7395.07	7395.07	7395.07	7395.07	7395.07	15248.9	15855.6	18824.3	25167.4	21414.9	22810.5	3627.65	1675.72	1418.93	2356.91	2040.85	101673	1836.17	1047.43	1473.62	1423.5	2211.84	2393.22
M253T32_1_neg	Chalepensin	Phenylpropanoids	Coumarins and derivatives	Furanocoumarins	-	-0.491554	1.88655	-2.37811	13017.4	13017.4	13017.4	13017.4	13017.4	13017.4	19956.5	15159.6	19823.8	14607.7	30088.2	34174.8	32589.1	30957.2	29866.7	22647.9	34176	37895.1	5178.59	2979.91	1720.7	7193.13	9578.8	9538.24
M571T250_pos	Decuroside_III	Phenylpropanoids	Coumarins and derivatives	Furanocoumarins	-	-0.93828	2.14748	-3.08576	18638.6	21869.1	19611.1	25469.7	18394.6	20630.2	27124.1	21962.3	15657.4	12830.5	19634.9	16372.2	22294.9	35726.1	44902.5	44759.1	28669	41297.9	5034.63	357.209	4547.49	12708.4	799.775	2188.58
M333T44_2_neg	Byakangelicin	Phenylpropanoids	Coumarins and derivatives	Furanocoumarins	-	1.57815	2.79295	-1.21481	18729	21057	16781.6	18819.8	21096.7	17809.2	30085.7	40859.3	28366.6	39320.6	44544.1	24965.6	11472.2	13942.8	11663.4	9099.04	11594	11937.6	5769.4	4410.54	5018.2	6422.05	4493.43	3919.26
M409T137_pos	Nodakenin	Phenylpropanoids	Coumarins and derivatives	Furanocoumarins	-	-1.16849	4.30411	-5.4726	339157	339157	339157	339157	339157	339157	1.53814e+07	1.63725e+07	4.80554e+07	5.26953e+07	7.00561e+07	5.66611e+07	2.87562e+07	6.07926e+07	1.17394e+08	1.37551e+08	1.30401e+08	1.07774e+08	835373	335158	2.48236e+06	2.90501e+06	3.50843e+06	3.05578e+06
M349T69_neg	6-[2,3-Dihydroxy-1-(hydroxymethyl)propyl]-1,2-dihydro-7-hydroxy-9-methoxy-cyclopenta[c][1]benzopyran-3,4-dione	Phenylpropanoids	Coumarins and derivatives	Others	ko00980(Metabolism of xenobiotics by cytochrome P450);	5.45876	3.96232	1.49644	135710	128954	134316	113889	164226	119926	122661	187296	128139	309338	207118	180550	4359.72	4828.41	4108.01	4287.14	4337.77	3888.81	7573.28	19969	5772.54	20029.2	10176.6	9300.56
M331T329_pos	alpha-(1,2-Dihydroxyethyl)-1,2,3,4-tetrahydro-7-hydroxy-9-methoxy-3,4-dioxocyclopenta[c][1]benzopyran-6-acetaldehyde	Phenylpropanoids	Coumarins and derivatives	Others	ko00980(Metabolism of xenobiotics by cytochrome P450);	6.58411	5.87873	0.705386	43539.8	43539.8	43539.8	43539.8	43539.8	43539.8	275201	499684	254546	576106	384546	499416	4983.6	4973.2	6024.97	2787.51	3250.86	3927.42	5207.05	8834.07	5823.82	7879.44	6006.07	8559.13
M581T213_pos	(+)-Syringaresinol_O-beta-D-glucoside	Phenylpropanoids	Lignans	Lignan glycosides	-	1.0262	2.01948	-0.993271	3743.07	3555	3453.24	3589.54	4232.04	3303.73	10822.4	3979.82	8093.53	8357.43	6814.66	10235.2	3593.81	5162.56	3260.83	3255.56	6001.65	2442.38	4870.55	1382.38	1111.29	1614.09	493.835	2441.69
M558T220_pos	Cleistanthin_A	Phenylpropanoids	Lignans	Lignan glycosides	-	-0.892607	2.01163	-2.90424	4441.64	4515.61	4123.86	4845.96	4239.65	4425.39	2994.04	4945.36	2614.6	3717.33	3671.92	4220.83	5088.96	6864.31	6771.54	5875.75	9485.18	7062.46	997.588	1190.08	528.091	796.871	997.838	986.055
M557T221_pos	Forsythin	Phenylpropanoids	Lignans	Lignan glycosides	-	-0.885863	2.7371	-3.62297	13575.4	17894.7	11283.2	15897.1	13947.4	14137.2	10292	25373.7	10495.3	13659.6	12499.9	11788.6	19880	28274.3	30063.7	26609.6	23848.7	26746.2	2242.81	2873.85	1969.51	1076.88	2242.42	2209.68
M517T216_neg	Simplexoside	Phenylpropanoids	Lignans	Lignan glycosides	-	1.01668	3.25018	-2.2335	15644.3	15937	17488.8	15075.2	17458.3	15708.2	25622	29881	24757.7	34011.1	28819.8	26615.5	28815.3	10675.3	12745.8	11126.8	9483.89	11031.2	1073.33	4116.96	2373.8	3804.61	3573.28	2894.05
M559T249_pos	(-)-Pinoresinol_glucoside	Phenylpropanoids	Lignans	Lignan glycosides	-	-0.0976102	2.23053	-2.32814	6763.17	6885.1	8248	6983.01	7653.03	6991.31	7613.3	9261.27	7896.09	10136.4	9925.15	9674.58	8317.75	10312.4	11774.9	10738.1	8218.25	8960.85	1468.92	1679.99	1294.25	3915.76	1362.95	1892.5
M328T223_neg	Phyllanthostatin_A	Phenylpropanoids	Lignans	Lignan glycosides	-	4.22699	1.54127	2.68573	30983.5	33756.3	32688.5	39299	30621.6	33104.8	29846.7	38548.5	38919.8	32585.6	46623.6	34096.1	2240.01	1973.05	1906.24	1842.46	1732.62	2086.92	9164.21	24710	8285.18	10280.3	10595.3	12766.4
M577T488_neg	Podorhizol_beta-D-glucoside	Phenylpropanoids	Lignans	Lignan glycosides	-	-0.768372	-6.0345	5.26613	1931.8	1886.83	1938.76	1917.58	1918.43	1918.86	181.717	142.853	188.252	208.449	105.584	161.272	467.568	107.446	57.8736	57.1451	533.008	460.081	9684.78	10467.8	10994.9	11845.9	11327.8	10449.5
M457T233_pos	Steganacin	Phenylpropanoids	Lignans	Lignans	ko01110(Biosynthesis of secondary metabolites);	0.602499	3.39508	-2.79258	21219.5	15842.4	10549	15144.4	17683.3	14826.2	22854.4	24661.4	36877.8	22362	21012.2	24072.1	15877.9	18807.8	25224.3	14211	8202.79	17679.8	2779.79	2866.87	2230.14	2696.85	1955.88	1903.74
M469T256_pos	Sesartemin	Phenylpropanoids	Lignans	Lignans	-	0.400018	-1.77775	2.17777	8916.15	8628.67	7308.84	10126.2	8321.95	8273.76	7235.55	6475.84	6677.27	6859.75	11628.9	6192.07	6713.43	5755.27	5949.89	6360.63	5413.29	3963.29	28873.4	28050.4	21193.9	22526.9	25589.4	28304.9
M387T36_pos	Burseran	Phenylpropanoids	Lignans	Lignans	-	0.177493	-1.95612	2.13362	65026.4	67168.3	71100.5	66915.4	67574.5	67405	48617.4	47781.3	44881.3	46412	49861.2	44090.1	137871	18982.8	21594	19038.2	28165.7	23387.8	193073	175141	175436	166768	191893	190516
M251T367_2_neg	Grandisin	Phenylpropanoids	Lignans	Lignans	-	1.3316	2.05669	-0.725082	15962.2	14477.2	16328.3	15739.4	14829.1	15933.8	18934.7	18168	32506.7	19388.6	21085.2	20702	8781.05	8275.93	9210.9	9219.95	8133.95	8342.65	4826.39	4824.32	6388.7	6375.28	3467.62	5554.22
M425T36_pos	(+)-Eudesmin	Phenylpropanoids	Lignans	Lignans	-	0.0313769	-2.23251	2.26389	5395.69	7506.18	6816.39	5713.65	6020.13	6702.72	3858.04	3854.66	3187.86	5066.34	2291.98	6029.81	12962.8	2058.47	2305.09	1549.47	2818.8	2071.49	24130.6	15321	19717.6	17110.5	17562.5	20302.9
M437T35_pos	Magnoshinin	Phenylpropanoids	Lignans	Lignans	-	-0.105457	-2.08294	1.97748	5790.86	5232.01	6218.77	5517.34	6123.92	5520.62	4813.39	4736.4	4216.28	5005.09	4166.2	4676.11	17741.8	1663.72	1785.02	1982.17	3084.55	3450.26	21555.5	17093.2	22176.4	20223.4	17259.2	18682.2
M433T305_pos	Prostalidin_A	Phenylpropanoids	Lignans	Lignans	-	-0.854285	2.23319	-3.08748	5754.02	5283.47	4465.99	5946.47	5139.54	5204.13	4241.92	3518.58	5030.25	3382.02	1435.39	1986.2	3745.13	5561.06	5550.81	8329.79	5601	6636.1	670.035	341.77	603.477	698.265	920.773	933.149
M416T318_neg	Gomisin_L1_methyl_ether	Phenylpropanoids	Lignans	Lignans	-	-3.31173	-2.54985	-0.761874	2731.38	2297.75	3474.1	2540.69	2753.21	2777.6	908.646	586.325	870.798	677.838	980.703	915.628	8039.79	7563.4	10774.8	12598	8768.8	1306.53	3457.37	4924.51	4461.55	5511.03	5463.9	5108.64
M402T303_pos	4'-Demethyldeoxypodophyllotoxin	Phenylpropanoids	Lignans	Lignans	-	0.122405	2.15041	-2.02801	3260.05	4788.69	3846.27	4008.83	3102.63	4363.29	8271.13	6356.28	5650.38	7019.01	5209.73	6902.89	5750.16	6160.7	5676.32	6128.73	7651.85	4835.88	1483.77	1650.33	1363.97	1943.66	1247.16	1188
M413T334_neg	Neoisostegane	Phenylpropanoids	Lignans	Lignans	-	0.788782	-5.94959	6.73837	2060.32	2368.97	2201.92	2303.99	2156.49	2219.78	283.814	285.55	243.217	190.474	165.986	89.3237	20.7005	170.57	115.868	115.975	175.783	129.487	12795.6	14102.6	11679	13657	12804.8	12730.9
M363T371_neg	Justicidin_B	Phenylpropanoids	Lignans	Lignans	-	-0.378764	-7.06317	6.6844	64021.9	63635	60202.9	63561.6	61518.7	63395.8	1611.23	1966.26	1973.55	1554.84	1336.25	1325.52	2051.01	2352.45	519.997	3344.5	2119.64	2312.56	243052	210983	247045	197861	211051	196226
M359T196_pos	Matairesinol	Phenylpropanoids	Lignans	Lignans	ko01110(Biosynthesis of secondary metabolites);	-2.11693	-0.310123	-1.80681	26109	25964.4	22233.1	26267.7	22720.9	26024.9	23181.7	31372	26200	26803.3	22258.7	19438.7	126326	109928	117061	96026.8	99032.1	99047.3	29838	29252.2	27572.9	36474.3	32073.1	29837.2
M327T187_pos	Magnolol	Phenylpropanoids	Lignans	Neolignans	-	-0.963964	1.65237	-2.61634	10330.4	7726.73	11067	10824.2	7264.04	10982.4	21184	17572.3	24725.5	15694.6	17519.8	20774.4	26476.2	52618.8	30088.5	31899.8	35209.4	52853.1	7205.67	3635.36	7753.28	5983.96	3956.34	8834.79
M374T154_pos	Kadsurenone	Phenylpropanoids	Lignans	Neolignans	-	-0.632662	2.87357	-3.50623	14182.6	9756.58	15182.9	10540.3	13386.1	12543.6	14426.9	9515.89	17358.6	13435.8	16505.8	11334.7	20870.7	24676.6	32419.5	25869.3	12340.4	11854.2	2673.78	879.522	2536.74	440.724	2605.41	2131.45
M287T39_pos	Sugiresinol	Phenylpropanoids	Lignans	Norlignans	-	2.01593	3.07047	-1.05453	29762.7	29762.7	29762.7	29762.7	29762.7	29762.7	65697.6	57374.5	76161.1	69375.2	72910.3	73267.4	22954.4	15777.8	14631.9	19228.7	14697.6	15267.2	8700.76	6769.61	7592.94	7737.04	8032.71	10543.6
M167T363_neg	cis-Hinokiresinol	Phenylpropanoids	Lignans	Norlignans	-	-0.296271	2.84156	-3.13783	4925.09	4682.85	5676.64	5009.88	5565.15	4797.68	5218.84	6363.5	6066.71	6006.36	6457.34	8047.36	7963.38	6433.06	7639.82	7896.43	8143.32	8783.31	1254.31	615.322	822.457	839.995	781.06	1010.56
M167T165_pos	Caffeyl_alcohol	Phenylpropanoids	Monolignols	Caffeate derivatives	ko01110(Biosynthesis of secondary metabolites);ko00940(Phenylpropanoid biosynthesis);	1.10521	-0.977774	2.08299	100934	100934	100934	100934	100934	100934	161390	122765	220480	105938	159135	153950	42192.3	112659	61873.4	72218.9	59036.1	81368	266861	245895	276663	315411	406610	307633
M353T177_neg	Chlorogenate;Chlorogenic acid;Caffeoyl quinic acid;trans-5-O-Caffeoyl-D-quinate	Phenylpropanoids	Monolignols	Caffeate derivatives	ko00941(Flavonoid biosynthesis);ko01110(Biosynthesis of secondary metabolites);ko00940(Phenylpropanoid biosynthesis);ko00945(Stilbenoid, diarylheptanoid and gingerol biosynthesis);	2.32269	1.44137	0.881313	19216.1	19216.1	19216.1	19216.1	19216.1	19216.1	22224.5	25697.2	22760.2	22804.5	26810	30892	5527.86	4914.5	4481.24	3977.87	5278.45	6041.86	8223.42	9942.7	7652.72	10160.6	9528.09	10162.6
M181T227_pos	Caffeate; Caffeic acid; 3,4-Dihydroxy-trans-cinnamate; trans-Caffeate; (2E)-3-(3,4-Dihydroxyphenyl)prop-2-enoate	Phenylpropanoids	Monolignols	Caffeate derivatives	ko00940(Phenylpropanoid biosynthesis);ko01110(Biosynthesis of secondary metabolites);ko01100(Metabolic pathways);	2.77939	2.53058	0.248814	36609.7	18484.8	21036.7	25706.3	24750.2	24857.6	44939.9	70280.7	52841	52066.5	125461	107045	13002.5	14284.6	11790.3	11393.4	9502.68	5954.27	13437.1	13574.6	19409.6	6964.3	13661	11290.6
M179T28_neg	Caffeate;Caffeic acid;3,4-Dihydroxycinnamic acid	Phenylpropanoids	Monolignols	Caffeate derivatives	ko00940(Phenylpropanoid biosynthesis);ko01061(Biosynthesis of phenylpropanoids);ko01100(Metabolic pathways);ko01110(Biosynthesis of secondary metabolites);ko01220(Degradation of aromatic compounds);	0.0215745	3.35674	-3.33517	185804	193877	187461	188751	188797	189022	238289	277386	284457	327202	335923	314821	309316	275247	301169	305625	308147	252182	25584.5	27925.8	30313.4	34450.7	27817.2	27477
M293T334_neg	Isochlorogenic_acid_b	Phenylpropanoids	Monolignols	Caffeate derivatives	-	-2.61621	0.0147159	-2.63092	4583.77	4356.99	4481.84	4649.63	5355.1	4076.58	1391.93	983.013	1450.54	1237.95	1386.29	1139.17	8166.91	7968.64	6872.57	8516.05	8006.99	6999.05	1122.33	1297.44	1138.27	1106.1	1481.12	1366.61
M209T352_neg	5-Hydroxyferulic_acid_methyl_ester	Phenylpropanoids	Monolignols	Coniferyl alcohol derivatives	ko00940(Phenylpropanoid biosynthesis);ko01100(Metabolic pathways);ko01110(Biosynthesis of secondary metabolites);	2.43902	1.40242	1.03659	11921.6	11921.6	11921.6	11921.6	11921.6	11921.6	22325.1	23336.2	42311.6	38280.2	42308.5	35746.9	12711.8	5356.02	6385.32	3580.87	1345.67	8296.68	10281.4	18265	11986.9	21811.8	9579.45	5363.97
M148T206_neg	trans-Cinnamate	Phenylpropanoids	Monolignols	Others	ko01110(Biosynthesis of secondary metabolites);ko01100(Metabolic pathways);ko00360(Phenylalanine metabolism);ko01070(Biosynthesis of plant hormones);ko00130(Ubiquinone and other terpenoid-quinone biosynthesis);ko00940(Phenylpropanoid biosynthesis);ko01060(Biosynthesis of plant secondary metabolites);	3.00777	2.96782	0.0399513	8366.68	8908.74	6716.32	8338.04	8401.33	7816.32	13248.3	13952	14443.4	14837.5	12437.6	13615.1	2122.84	1725.81	1801.13	1604.46	1503.76	1503.3	2309.71	1626.58	1319.07	2129.64	1838.91	1325.52
M149T163_pos	Estragole	Phenylpropanoids	Monolignols	Others	ko00940(Phenylpropanoid biosynthesis);	0.258357	2.72177	-2.46342	30337.5	30337.5	30337.5	30337.5	30337.5	30337.5	38542.3	46029.7	56852.8	92409.9	67179.8	73412.6	25841.8	41683.5	50322.3	83347	55890.4	55950.9	6592.19	10721.9	11793.4	6099.01	8450.72	13101.5
M325T331_neg	trans-beta-D-Glucosyl-2-hydroxycinnamate	Phenylpropanoids	Monolignols	Others	ko00940(Phenylpropanoid biosynthesis);ko01110(Biosynthesis of secondary metabolites);	2.92361	3.45009	-0.52648	18021.7	18021.7	18021.7	18021.7	18021.7	18021.7	40958.5	46923.7	41647.3	38326.6	50953.8	43502.1	4526.85	6997.02	5501.49	5932.67	6107.76	5506.27	2741.67	2136.34	2561.96	1722.38	2320.02	12519.2
M133T327_pos	Cinnamaldehyde	Phenylpropanoids	Monolignols	Others	ko00940(Phenylpropanoid biosynthesis);ko01110(Biosynthesis of secondary metabolites);ko01100(Metabolic pathways);ko01060(Biosynthesis of plant secondary metabolites);	3.27903	3.2784	0.000633941	2907.24	2907.24	2907.24	2907.24	2907.24	2907.24	8574.72	8457.85	8280.88	8357.77	8349.21	10663.6	961.904	1173.11	777.087	704.576	906.407	904.312	1096.4	798.078	986.931	803.197	907.75	837.422
M193T45_pos	Myristicin	Phenylpropanoids	Monolignols	Others	-	0.794006	-1.23325	2.02725	44034.6	44034.6	44034.6	44034.6	44034.6	44034.6	66459.1	54135.6	35815.7	39112.2	34367.7	44066.7	40094.8	26027.4	17850.3	21008.4	22612.5	30408.7	157695	100875	100647	90164.4	96711.9	97967.6
M233T28_neg	1'-Acetoxychavicol_acetate	Phenylpropanoids	Monolignols	Others	-	0.304967	4.78051	-4.47554	542286	587328	551793	559006	531925	574665	710641	1.016e+06	757494	1.01053e+06	906824	874094	754291	748290	622702	793087	741851	610160	32813.8	28909.5	31041.5	31596.8	35070	32520.8
M319T45_neg	4-Coumaroylshikimate	Phenylpropanoids	Monolignols	Paracoumaryl alcohol derivatives	ko01110(Biosynthesis of secondary metabolites);ko01100(Metabolic pathways);ko00940(Phenylpropanoid biosynthesis);ko00945(Stilbenoid, diarylheptanoid and gingerol biosynthesis);ko00941(Flavonoid biosynthesis);	3.55177	4.82812	-1.27635	42429.8	43086.8	41349	45405.2	40949.5	42959.7	83868.5	94282.5	92332.9	101391	94423.3	88325.9	12657.1	6459.28	6247.38	5762.29	6284.97	9883.25	1814.46	3240.06	6254.2	3625.57	2844.15	1746.48
M147T273_neg	4-Hydroxycinnamyl_aldehyde	Phenylpropanoids	Monolignols	Paracoumaryl alcohol derivatives	ko01100(Metabolic pathways);ko01110(Biosynthesis of secondary metabolites);ko00940(Phenylpropanoid biosynthesis);	-1.11479	-3.55458	2.43979	8604.81	8604.81	8604.81	8604.81	8604.81	8604.81	3284.42	3441.37	4234.07	3445.86	3320.24	4441.17	12640.4	6346.03	6963.54	8052.92	6958.64	7044.31	77775.7	36715.7	35749.6	34838.4	38030.9	37350.9
M163T330_neg	4-Coumarate; p-Coumaric acid; trans-4-Hydroxycinnamate; trans-p-Hydroxycinnamate; 4-Hydroxycinnamic acid; 4-Hydroxycinnamate	Phenylpropanoids	Monolignols	Paracoumaryl alcohol derivatives	ko00360(Phenylalanine metabolism);ko01100(Metabolic pathways);ko01110(Biosynthesis of secondary metabolites);ko00940(Phenylpropanoid biosynthesis);ko00130(Ubiquinone and other terpenoid-quinone biosynthesis);ko00350(Tyrosine metabolism);	3.2743	2.15633	1.11797	66478.6	66478.6	66478.6	66478.6	66478.6	66478.6	160816	140612	153689	149593	163195	149418	15138.5	15939.5	15110.1	15708.2	15813.2	17101.8	35594.5	29811.6	37991.2	32789.5	36231.7	33361.7
M209T45_neg	Sinapyl alcohol	Phenylpropanoids	Monolignols	Sinapate derivatives	ko01100(Metabolic pathways);ko01110(Biosynthesis of secondary metabolites);ko00940(Phenylpropanoid biosynthesis);	-0.882344	-4.63521	3.75286	41963.8	41963.8	41963.8	41963.8	41963.8	41963.8	11618	10448.2	12583.8	10835.3	11260.6	12386.5	24467.4	21521.1	22667.9	19423.6	19178.7	20177.7	281518	248851	306702	317530	303023	260352
M349T370_pos	Sinapine	Phenylpropanoids	Monolignols	Sinapate derivatives	ko00940(Phenylpropanoid biosynthesis);	0.967445	-1.91666	2.8841	6199.21	5294.81	5821.78	5743.64	5814.92	5757.07	4211.94	4302.78	4718.51	4270.78	4075.56	5066.67	1521.65	2336.07	2338.76	2260.3	2816.14	2354.26	16991.4	14876	17518.5	15895.1	17487.7	17833.5
M361T219_neg	Sinapoyl_malate	Phenylpropanoids	Monolignols	Sinapate derivatives	ko00940(Phenylpropanoid biosynthesis);	3.42741	2.54901	0.8784	9818.97	5584.18	7232.73	6175.23	8127.63	7164.47	12542.2	16779.6	14905.1	24625.2	9683.04	10545.3	2311.66	419.559	1819.86	1527.24	1164.99	1036.64	3305.4	3504.35	2969.6	1698.65	2069.63	1673.69
M409T324_pos	1-O-Sinapoyl-beta-D-glucose	Phenylpropanoids	Monolignols	Sinapate derivatives	ko00940(Phenylpropanoid biosynthesis);	3.08227	2.96702	0.115244	41572.5	37235.3	41997.8	40901.2	39939.3	40298	224876	182638	145187	109950	123766	118829	25551.4	17257.8	17436	13900.2	17497.8	15240.6	20733.2	17549.6	18685.3	18244.9	20449.2	20109.8
M371T328_neg	Syringin	Phenylpropanoids	Monolignols	Sinapate derivatives	ko00940(Phenylpropanoid biosynthesis);	2.42159	6.3167	-3.89511	275370	283060	259357	274143	302432	259089	578545	521710	629109	511602	516419	498207	102594	94873.9	109581	90856	103052	106699	3309.76	10089.4	4450.1	8976.96	6463.7	7552.79
M209T68_pos	Sinapoyl_aldehyde	Phenylpropanoids	Monolignols	Sinapate derivatives	ko00940(Phenylpropanoid biosynthesis);ko01110(Biosynthesis of secondary metabolites);ko01100(Metabolic pathways);	-2.14414	-2.64162	0.497486	48294.1	48294.1	48294.1	48294.1	48294.1	48294.1	39761.5	23053.5	13017.8	42854.8	35022.5	41935.5	388711	160207	108447	48110.8	70591.6	88741	196211	302803	246749	162243	144847	168041
M885T313_pos	Urdamycin_F	Polyketides	Angucyclines	Angucyclines	ko01110(Biosynthesis of secondary metabolites);ko01057(Biosynthesis of type II polyketide products);	-3.48932	0.437775	-3.92709	1633.45	2145	1602.55	1783.88	2042.63	1655.97	452.77	291.806	306.004	289.634	732.873	347.245	3228.43	3949.1	5332.17	4620.66	5419.14	4631.42	109.675	216.513	103.626	357.182	583.131	416.738
M303T172_neg	Tetrangulol	Polyketides	Angucyclines	Angucyclines	ko01110(Biosynthesis of secondary metabolites);ko01057(Biosynthesis of type II polyketide products);	3.91771	1.76547	2.15224	38336.9	38336.9	38336.9	38336.9	38336.9	38336.9	49223.4	65254.7	58024	61227.2	56707.8	57804.3	4054.33	4181.39	4404.99	3475.52	2921.28	4005.2	17998	20345.9	16579	16439.5	16251.3	14814.8
M317T223_neg	Prekinamycin	Polyketides	Angucyclines	Angucyclines	ko01057(Biosynthesis of type II polyketide products);	4.69738	2.69404	2.00334	24900	26565.7	25362.3	26172.7	25591.5	25552.1	34696.3	33870	34038.6	36180.3	33557.2	34335.7	1344.53	1399.52	1270.41	1354.64	1282.19	1314.73	1865.62	5641.11	2506.61	13609.7	4113.54	4201.43
M319T262_pos	8-O-Methyltetrangulol	Polyketides	Angucyclines	Angucyclines	ko01057(Biosynthesis of type II polyketide products);	0.819893	4.31255	-3.49265	74547.8	74547.8	74547.8	74547.8	74547.8	74547.8	147912	132738	150351	127032	136587	133201	50004.4	79728.9	78708.6	94982.5	83635.5	81886.8	4131.72	7031.11	8213.33	9531.48	6733.9	6019.46
M509T500_pos	Aquayamycin	Polyketides	Angucyclines	Angucyclines	ko01110(Biosynthesis of secondary metabolites);ko01057(Biosynthesis of type II polyketide products);	-0.210451	-2.09548	1.88502	6115.07	4996.8	4570.94	2782.78	6567.1	4787.89	4347.76	4554.82	3491.95	3374.48	2695.29	2278.66	1220.77	4632.31	5000.55	5543.65	4298.39	3304.98	21308.5	18420.7	16588.5	13288.3	8558.72	10483.9
M699T122_neg	27-O-Demethylrifamycin	Polyketides	Ansamycins and related polyketides	Ansamycins and related polyketides	ko01051(Biosynthesis of ansamycins);ko01110(Biosynthesis of secondary metabolites);	-0.85946	2.61791	-3.47737	9537.28	15903.8	6576.81	13244.4	9725.98	10294.8	16649.8	12837.1	12204.4	8262.05	12144.9	875.869	23690.9	7346.03	16358.6	23728.4	16263.5	26870.2	1660.8	1119.17	1820.58	1950.26	1820.74	1887.12
M864T431_pos	4''-O-Carbamoyl	Polyketides	Ansamycins and related polyketides	Ansamycins and related polyketides	ko01051(Biosynthesis of ansamycins);ko01110(Biosynthesis of secondary metabolites);	1.24159	-2.94959	4.19117	395.863	447.758	414.177	415.179	423.456	415.118	491.602	166.709	397.877	214.745	334.363	204.611	41.0452	150.18	122.983	212.547	160.209	78.459	2956.2	2958.68	2434.62	1755.99	1894.45	1982.08
M662T414_pos	Protorifamycin	Polyketides	Ansamycins and related polyketides	Ansamycins and related polyketides	ko01051(Biosynthesis of ansamycins);	-2.69859	-7.83698	5.13839	1922.95	1604.36	2101.68	1820.8	1836.97	1869.28	57.9239	49.598	16.2373	51.5438	22.997	44.4859	184.774	227.443	186.906	349.901	318.583	308.476	9096.77	7735.57	10558.4	9040.88	9274.33	9806.44
M673T499_pos	Ansamitocin	Polyketides	Ansamycins and related polyketides	Ansamycins and related polyketides	ko01051(Biosynthesis of ansamycins);ko01110(Biosynthesis of secondary metabolites);ko01052(Type I polyketide structures);	-0.454147	-5.39352	4.93937	4176.8	4176.8	4176.8	4176.8	4176.8	4176.8	307.657	231.858	261.497	230.156	257.888	354.576	361.449	324.238	441.456	322.939	407.922	393.727	14908.7	10465.3	11486.8	9859.06	10495.7	11874.4
M476T318_neg	19-Chloroproansamitocin	Polyketides	Ansamycins and related polyketides	Ansamycins and related polyketides	ko01051(Biosynthesis of ansamycins);ko01110(Biosynthesis of secondary metabolites);	0.572611	2.17957	-1.60696	4856.55	6773.28	4978.72	5298.56	5443.96	5481.98	9998.74	11973	12625.6	13492.1	11114	9130.1	8933.28	7124.49	9634.53	7920.55	6625.79	5708.83	2208.64	3040.73	2472.67	4460.83	1402.74	1498.49
M507T430_pos	Cassiamin_C	Polyketides	Anthraquinones	Anthraquinone type	-	2.34174	0.984892	1.35685	3760.13	4044.52	3796.56	3859.41	3862.21	3864.12	4302.27	5817.27	5793.19	10224.1	6425.5	6581.64	766.49	1211.27	1291.41	1757.97	1565.06	1129.84	3157.06	3579.98	2941.5	3384.41	3447.22	3267.87
M221T311_neg	Tectoquinone;2-Methylanthraquinone	Polyketides	Anthraquinones	Anthraquinone type	-	0.0435805	2.28502	-2.24144	14279.3	14279.3	14279.3	14279.3	14279.3	14279.3	26487.6	25176.8	21055	17211.9	19905.3	14338.8	30256	16513.4	17615.8	13720.5	23978.2	18396.6	6220.67	3747.59	3819.07	3139.15	3863.56	4688.62
M329T176_neg	Aurantio-obtusin	Polyketides	Anthraquinones	Anthraquinone type	-	7.72341	4.11618	3.60723	1.41842e+06	1.59593e+06	1.18677e+06	1.36662e+06	1.43155e+06	1.38697e+06	2.37486e+06	3.02246e+06	2.55507e+06	2.64622e+06	2.38263e+06	2.41756e+06	10662.3	11341.7	12065.1	12562.6	12616.2	13615.5	26016.4	149649	52391.8	290868	184075	184959
M491T140_neg	Aurantio-obtusin_beta-D-glucoside	Polyketides	Anthraquinones	Anthraquinone type	-	6.00663	5.73397	0.272656	1.66923e+06	1.59633e+06	2.17116e+06	1.73795e+06	1.80697e+06	1.75894e+06	4.22729e+06	6.12807e+06	3.94756e+06	3.80204e+06	3.93473e+06	4.73458e+06	82401.5	94357.9	2027.22	91597.6	75250.4	70795.3	45517.5	151026	44054.7	51033.1	103217	108212
M563T417_neg	Cascaroside_C	Polyketides	Anthraquinones	Anthrone type	-	1.8581	-1.47431	3.33241	6387.52	6414.12	5636.98	6432.81	6321.9	6083.37	6087.04	9798.24	4688.83	8229.12	6187.06	6784.3	1641.14	2093.81	1726.4	1986.25	1836.42	2239.03	15923.3	19513.3	17295.1	22281.3	21250.9	19806.8
M584T42_neg	epsilon-Rhodomycin	Polyketides	Aromatic polyketides	Anthracyclinones	ko01110(Biosynthesis of secondary metabolites);ko01057(Biosynthesis of type II polyketide products);	-0.846879	-3.12115	2.27427	1499.3	1630.88	2057.99	1450.52	1708.41	1688.93	716.759	583.251	802.233	660.705	756.084	720.778	1304.66	1333.89	1473.49	1315.8	1183.87	1014.04	7768.66	5486.95	6270.97	5352.39	6530.34	5480.36
M568T43_neg	Aclacinomycin	Polyketides	Aromatic polyketides	Anthracyclinones	ko01110(Biosynthesis of secondary metabolites);ko01057(Biosynthesis of type II polyketide products);	-0.150115	-2.10655	1.95644	1403.15	1729.6	985.075	1273.15	1419.17	1330.84	1504.1	1590.76	964.02	733.385	1076.94	1262.2	936.106	1392.66	1103.06	1639.99	1526.19	1315.42	6108.58	5140.11	4868.89	4137.11	5359.9	5097.6
M538T179_pos	13-Deoxycarminomycin	Polyketides	Aromatic polyketides	Anthracyclinones	ko01110(Biosynthesis of secondary metabolites);ko01057(Biosynthesis of type II polyketide products);	4.63247	3.65175	0.980725	18633.5	18633.5	18633.5	18633.5	18633.5	18633.5	47897.6	47820	32727.5	35241	33490.9	33612.5	1910.98	1599.2	1650.98	1502.49	1279.01	1362.07	3479.47	4519.3	3289.4	2281.43	1412.44	3380.42
M788T69_pos	Nogalamycin	Polyketides	Aromatic polyketides	Anthracyclinones	ko01110(Biosynthesis of secondary metabolites);ko01057(Biosynthesis of type II polyketide products);	3.29811	1.86954	1.42857	9316.85	4857.85	8487.28	11605.1	6664.83	7529.81	25627.9	26372	9995.25	12075.8	20225.7	16196.1	1786.32	2160.96	1774.89	2041.55	1602.28	1867.22	4639.49	6756.03	6164.79	4376.14	5451.31	2849.73
M500T248_neg	Stigmatellin	Polyketides	Aromatic polyketides	Benzopyranoids	-	-4.1768	-3.24126	-0.935538	1280.25	1242.17	551.66	1198.13	1050.07	959.686	353.807	105.105	294.189	636.845	113.985	261.207	6153.79	3571.07	5618.73	3881.54	9181.37	3517.78	1459.41	4545.75	1600.16	1825.37	2005.36	5255.48
M509T217_pos	Stigmatellin	Polyketides	Aromatic polyketides	Benzopyranoids	-	1.33398	2.46487	-1.13089	3912.89	3090.52	3150.23	3154.64	3578.19	3315.91	5554.61	7641.05	9637.88	9187.53	7359.08	9869.1	3751.53	4547.29	3480.97	3461.8	300.33	3993.9	1381.72	1626.12	1317.07	1668.88	1552.92	1373.98
M317T176_neg	Lecanoric acid; Orsellinate depside	Polyketides	Aromatic polyketides	Depsides and depsidones	-	3.00748	3.32938	-0.321898	113578	120114	125387	111559	120846	118428	201986	237728	277515	177011	225946	196877	30847.6	30180.6	34790.2	25727.1	23094.5	19140.8	3482.77	16938.4	56748.8	23411.3	8864.89	21581.3
M389T472_pos	Dehydrogriseofulvin	Polyketides	Aromatic polyketides	Dibenzofurans, griseofulvins, dibenzopyrans and xanthones	-	-1.83781	2.57816	-4.41597	6788.62	6945.48	9135.21	6572.51	7520.39	7450.77	4425.11	5839.11	6276.46	6962.22	8354.98	6759.7	21721.5	28796.5	47071.7	13414	15712.9	11328.9	966.099	1233.73	773.1	1637.26	950.861	905.637
M429T506_neg	DNDS	Polyketides	Aromatic polyketides	Diphenyl ethers, biphenyls, dibenzyls and stilbenes	-	-2.77026	-0.0318323	-2.73843	8426.86	7995.48	8381.78	8289.7	8276.97	8262.18	4924.98	6202.53	4523.04	5187.24	4687.07	1134.81	33492.3	22724	30432.1	25351.9	34434.2	35446.4	4977.06	2845.75	4000.08	4757.66	5177.1	5496.78
M186T258_pos	Orsellinate	Polyketides	Aromatic polyketides	Monocyclic aromatic polyketides	-	-1.37364	0.897206	-2.27085	20244.5	18316.7	15085.4	19481.8	10266.7	23969.4	13417.1	12867.3	16151.5	14919.5	17671.8	16279	34795.2	40400.3	33925.4	45837.2	58842.2	22795.6	7161.95	8046.95	7657.23	8004.67	8535.97	9617.78
M231T27_neg	2-Hydroxy-7-methoxy-5-methyl-1-naphthoate	Polyketides	Aromatic polyketides	Naphthalenes and naphthoquinones	ko01059(Biosynthesis of enediyne antibiotics);ko01100(Metabolic pathways);ko01110(Biosynthesis of secondary metabolites);	0.1667	4.54866	-4.38196	121631	134461	125218	125103	127837	126366	154859	215511	162371	224814	198378	203689	183274	191194	145857	170513	187917	154326	8776.61	7103.05	8691.92	7086.23	8267.59	9623.24
M341T39_neg	3-Linalylflaviolin	Polyketides	Aromatic polyketides	Naphthalenes and naphthoquinones	-	1.73836	2.56124	-0.822888	26497.5	26497.5	26497.5	26497.5	26497.5	26497.5	69495.6	53099	76104.1	53144.7	67619.2	58478.6	19253.3	19971.3	17251.6	19002.7	19603.3	18190.8	8488.8	9046.7	15827.9	8105.27	10073.8	12491.8
M963T220_pos	3A-Deolivosylpremithramycin	Polyketides	Aromatic polyketides	Other aromatic polyketides	ko01057(Biosynthesis of type II polyketide products);ko01100(Metabolic pathways);ko01110(Biosynthesis of secondary metabolites);	-0.509256	2.12951	-2.63877	2069.15	1711.47	1824.17	1891.65	1882.39	1867.32	2296.53	2587.53	2294.31	2720	2180.49	1781.7	2140.07	2621.33	4724.3	2498.03	3931.82	3812.41	208.365	769.543	427.188	556.132	484.027	722.371
M344T86_neg	8-Demethyl-8-(2-O-methyl-alpha-L-rhamnosyl)tetracenomycin	Polyketides	Aromatic polyketides	Other aromatic polyketides	ko01057(Biosynthesis of type II polyketide products);ko01100(Metabolic pathways);ko01110(Biosynthesis of secondary metabolites);	4.77259	3.33579	1.4368	62661.9	115659	90457.1	73335.8	86684.9	85290.1	93470.4	96076.4	161300	204783	58980.5	122769	4495.06	3479.78	7130.87	6543.26	2637.79	2690.45	16868.9	8618.02	21891.9	10268.9	10260.1	5124.73
M419T471_2_pos	Tetracenomycin	Polyketides	Aromatic polyketides	Other aromatic polyketides	ko01110(Biosynthesis of secondary metabolites);ko01057(Biosynthesis of type II polyketide products);ko01100(Metabolic pathways);	-3.44892	1.99557	-5.44448	1193.71	1823.37	2800.93	1741.64	1695.96	1792.91	1004.2	1059.4	760.307	889.997	826.817	1362.29	6142.19	11035	16106.1	4205.23	10267.2	16705.8	184.165	176.853	282.391	250.202	328.508	258.174
M444T291_neg	Premithramycin	Polyketides	Aromatic polyketides	Other aromatic polyketides	ko01110(Biosynthesis of secondary metabolites);ko01057(Biosynthesis of type II polyketide products);ko01100(Metabolic pathways);	1.89156	2.65083	-0.759271	7786.59	6898	4631.46	6554.03	3907.78	8325.98	14047.5	7006.77	8772.98	16295.8	8109.42	9578.45	2950.84	1233.33	1253.98	4381.23	4825.69	2552.93	1933.65	1306.69	1154.38	2581.58	2382.57	801.631
M482T213_pos	11-O-Demethylpradinone	Polyketides	Aromatic polyketides	Other aromatic polyketides	-	2.53108	3.86079	-1.32971	2607.39	2798.32	1823.74	2680.83	2402.81	2401.2	4892.94	5033.57	4366.79	5930.44	4004.36	9411.76	1307.03	1142.26	861.252	868.349	785.04	856.048	384.318	582.674	296.278	314.326	310.341	427.535
M567T176_neg	11-O-Demethylpradimicinone	Polyketides	Aromatic polyketides	Other aromatic polyketides	-	2.59426	1.55427	1.03999	5737.7	8290.6	6037.66	6586.51	6370.49	6695.31	9200.82	11986	7448.75	11340.5	20610.2	14034.7	2233.65	2466.51	2448.1	1732.13	750.248	2726.35	3573.15	3805.75	4154.11	4441.72	4478.59	4955.26
M495T429_pos	11-O-Demethyl-7-methoxypradinone	Polyketides	Aromatic polyketides	Other aromatic polyketides	-	2.28203	1.39887	0.883155	3179.89	2755.59	2894.52	2138.03	3163.99	2877.44	6567.44	5476.85	4654.36	5177.45	4139.53	4597.74	1065.03	1506.8	782.623	625.509	1133.08	1181.32	216.005	3814.09	1657.76	2333.81	1784.63	1803.05
M595T246_neg	7-Methoxypradimicinone	Polyketides	Aromatic polyketides	Other aromatic polyketides	-	2.65374	3.25947	-0.605733	4577.1	4716.22	3727.62	4506.69	4158.43	4457.9	8009.5	8128.06	9704.13	9540.43	5183.35	3703.77	1150.2	1228.38	983.368	1422.97	1157.55	1092.25	528.368	901.14	703.886	993.929	860.539	634.911
M545T178_pos	Premithramycin	Polyketides	Aromatic polyketides	Other aromatic polyketides	ko01110(Biosynthesis of secondary metabolites);ko01057(Biosynthesis of type II polyketide products);ko01100(Metabolic pathways);	-1.16235	-3.37497	2.21263	47975.1	48201.7	34621.7	55107.6	43760.2	43366	63471.1	97469.7	48232.6	45790.9	25180.5	33937.5	127678	118250	103312	105869	136093	111782	536920	482487	723655	466349	486093	562951
M518T252_pos	Cytochalasin_B	Polyketides	Cytochalasins	Cytochalasins	-	-1.38427	2.15389	-3.53816	13785.4	12633.8	11306.2	13675	12582.6	12643.1	10444.2	11025.3	13224.5	19446.6	14726.3	17333.2	49888.8	56014.4	31263.9	29861.8	29197.5	28789.4	3070.98	3461.94	2518.55	3280.99	3342.55	3694.57
M319T357_pos	Zearalenone	Polyketides	Fungal toxins	Fungal toxins	-	-0.644122	-2.13367	1.48955	5550	5550	5550	5550	5550	5550	4684.81	6138.16	2216.4	1900.92	4275.31	2258.21	13997	5800.3	3395.65	3653.61	3613.08	3099.41	27925.2	16946	13501.3	11249	13576.9	11035.8
M501T47_pos	Chlortetracycline	Polyketides	Linear tetracyclines	Linear tetracyclines	ko01110(Biosynthesis of secondary metabolites);ko01057(Biosynthesis of type II polyketide products);ko01100(Metabolic pathways);ko00253(Tetracycline biosynthesis);	4.69384	5.02855	-0.334711	4438.24	3095.6	4256.15	3886.06	3756.76	3958.78	21174.3	25648.9	21446	22411.8	13632.2	9267.17	803.769	1234.9	731.877	753.345	536.843	327.788	572.979	896.997	524.176	609.461	693.669	182.564
M476T430_neg	Oxytetracycline	Polyketides	Linear tetracyclines	Linear tetracyclines	ko01110(Biosynthesis of secondary metabolites);ko01057(Biosynthesis of type II polyketide products);ko01100(Metabolic pathways);ko00253(Tetracycline biosynthesis);	0.696537	-1.55521	2.25175	1831.75	1715.1	1583.8	1901.47	1338.64	1948.32	1529.1	1474.72	1617.13	1677.45	1519.43	2319.49	763.521	911.177	1129.14	1410.34	818.12	1222.95	4409.39	4825.47	5146.43	4581.55	5343.26	5485.18
M497T264_pos	5a,11a-Dehydrooxytetracycline	Polyketides	Linear tetracyclines	Linear tetracyclines	ko01110(Biosynthesis of secondary metabolites);ko01057(Biosynthesis of type II polyketide products);ko01100(Metabolic pathways);ko00253(Tetracycline biosynthesis);	1.70991	2.99753	-1.28762	2587.61	6177.11	5055.98	3969.85	4408.6	4098.86	10742.7	9340.97	8983.67	9215.43	6953.27	11349.4	2650.29	3396.12	1698.16	2832.68	3361.14	3358.52	1233.51	1261.01	593.8	1221.92	1421.14	1353.92
M510T202_neg	11a-Hydroxy-7-chlortetracycline	Polyketides	Linear tetracyclines	Linear tetracyclines	ko01110(Biosynthesis of secondary metabolites);ko00253(Tetracycline biosynthesis);	5.95267	4.10505	1.84763	119633	109074	100594	111427	108660	111179	196597	198994	188960	222011	181182	185894	3351.57	3561.08	3006.93	2946.8	2951.16	3132.1	3862.52	18253.1	2621.34	19150.4	13354.9	10958.9
M691T410_pos	Dalfopristin	Polyketides	Macrolide lactams	Macrolide lactams	-	-2.08026	-0.575588	-1.50467	614.664	851.602	589.914	679.188	642.658	695.629	404.88	505.125	347.139	457.225	404.037	471.724	696.156	1896.06	2094.02	2056.39	2248.75	1961.82	543.998	569.302	642.147	811.198	614.803	678.586
M373T327_pos	8,8a-Deoxyoleandolide	Polyketides	Macrolides and lactone polyketides	Macrolides and lactone polyketides	ko00522(Biosynthesis of 12-, 14- and 16-membered macrolides);ko01110(Biosynthesis of secondary metabolites);ko01100(Metabolic pathways);	-3.4273	0.730642	-4.15794	738.795	732.428	602.889	908.796	580.257	755.372	174.453	397.93	197.742	381.873	186.175	172.843	1200.12	3117.4	3217.59	3461.16	2910.9	2347.89	246.259	210.152	188.696	134.259	91.916	39.3094
M962T172_pos	Megalomicin	Polyketides	Macrolides and lactone polyketides	Macrolides and lactone polyketides	ko00522(Biosynthesis of 12-, 14- and 16-membered macrolides);ko01110(Biosynthesis of secondary metabolites);	-3.59589	-4.94123	1.34533	7688.3	7688.3	7688.3	7688.3	7688.3	7688.3	348.784	1257.26	324.422	240.491	892.555	457.948	28659.6	3294.03	3267.61	2911.27	1477.13	2969.22	8978.54	26243	12876	27439.9	17825	14825.7
M453T223_neg	Mycinamicin	Polyketides	Macrolides and lactone polyketides	Macrolides and lactone polyketides	ko00522(Biosynthesis of 12-, 14- and 16-membered macrolides);ko01110(Biosynthesis of secondary metabolites);ko01100(Metabolic pathways);	1.08847	-6.32702	7.41549	994.91	1474.2	1250.32	1263.41	1221.61	1204.79	111.964	94.0707	57.4204	85.4193	154.628	155.076	48.9737	37.5911	74.2453	70.7905	34.7085	43.3941	5392.49	12171.1	6504.77	10739.5	7904.22	10160.7
M547T204_pos	3-O-alpha-Mycarosylerythronolide	Polyketides	Macrolides and lactone polyketides	Macrolides and lactone polyketides	ko00522(Biosynthesis of 12-, 14- and 16-membered macrolides);ko01110(Biosynthesis of secondary metabolites);ko01100(Metabolic pathways);	0.465553	3.22793	-2.76238	15387.8	13610.2	8349.74	14529.5	12462.4	12269	35917.5	21559.3	27375.5	16308.8	23357.8	17707.7	20553.7	22761.1	20293.9	8982.91	15700.1	14707.8	3355.28	4119.84	968.511	2952.16	1920.09	1864.28
M625T503_pos	6,8a-Seco-6,8a-deoxy-5-oxoavermectin	Polyketides	Macrolides and lactone polyketides	Macrolides and lactone polyketides	ko00522(Biosynthesis of 12-, 14- and 16-membered macrolides);	-0.459772	-5.00783	4.54806	724.09	764.17	560.714	847.16	612.875	719.814	172.548	132.678	95.46	69.1101	55.2807	104.442	160.386	127.095	97.2062	210.543	129.083	141.479	3499.37	3825.28	3586.71	2697.04	3093.99	3551.87
M699T205_neg	Mycolactone	Polyketides	Macrolides and lactone polyketides	Macrolides and lactone polyketides	ko01052(Type I polyketide structures);	2.45149	-3.35627	5.80776	5908.23	4833.62	5952.41	5300.96	5581.74	5523.39	2265.74	2994.95	2158.35	4162.92	3179.17	3991.27	1592.97	452.885	290.517	449.742	360.51	281.722	26232.3	34095.8	31348.3	38799.9	29007	32557.7
M733T40_pos	Mycolactone	Polyketides	Macrolides and lactone polyketides	Macrolides and lactone polyketides	ko01052(Type I polyketide structures);	-1.8518	-4.31411	2.46232	696.599	909.062	751.294	769.211	773.82	780.542	360.488	121.7	154.043	56.1104	242.125	174.517	1166.38	542.695	248.294	462.365	903.704	679.431	2803.85	2703.31	2998.14	3681.54	4794.43	5078.56
M807T206_neg	Immunomycin	Polyketides	Macrolides and lactone polyketides	Macrolides and lactone polyketides	ko01052(Type I polyketide structures);	2.31082	-3.45402	5.76484	1058.02	1328.54	1018.01	1160.5	1134.28	1124.9	402.862	378.992	401.856	554.697	454.124	435.469	58.6892	13.7119	50.8634	122.47	128.495	155.434	2206.21	8106.17	2364.79	10127.2	2883.03	3112.32
M319T313_neg	6,8a-Seco-6,8a-deoxy-5-oxoavermectin	Polyketides	Macrolides and lactone polyketides	Macrolides and lactone polyketides	ko00522(Biosynthesis of 12-, 14- and 16-membered macrolides);ko01110(Biosynthesis of secondary metabolites);ko01100(Metabolic pathways);	1.86228	2.44393	-0.581652	15474.2	14798	13087.6	14052.9	15078.1	14263.6	27905.5	24080.7	27317.3	25055.8	24860.9	26495.4	8686.18	6749.89	6002.7	7806.38	6487.83	7095.34	4964	5247.81	4000.53	4938.51	4497.11	4969.84
M500T398_pos	Epothilone	Polyketides	Macrolides and lactone polyketides	Macrolides and lactone polyketides	-	-0.440324	-3.17031	2.72999	1724.71	1684.32	1307.32	1636.44	1621.1	1556.51	675.084	394.507	920.178	670.039	440.839	765.841	442.099	844.265	1049.45	957.414	1133.95	819.289	5389.83	5574.36	6365.87	4881.39	5667.05	6929.21
M190T201_neg	Juglone	Polyketides	Naphthoquinones	alpha-Naphthoquinones	-	0.826767	-3.43985	4.26662	4947.94	4947.94	4947.94	4947.94	4947.94	4947.94	1816.42	2506.65	4776.45	3354.8	3232.62	2575.99	790.541	1290.28	1735.32	1276.1	996.246	4208	20332.3	33498.9	42280.9	37898.4	33082.9	31090.8
M361T462_pos	beta-Cyclopiazonate	Polyketides	Non-ribosomal peptide/polyketide hybrids	Non-ribosomal peptide/polyketide hybrids	-	-1.18543	-2.60547	1.42005	2000.6	2166.29	2172.72	2227.93	1686.88	2353.99	1224.4	1142.21	1210.77	1728.97	1824.01	1258.52	1263.25	2105.81	2777.31	3919.02	4239.96	4773.54	7333.02	8080.07	8857.44	10520.8	7768.11	8494.61
M191T303_neg	Yakuchinone_A	Polyketides	Others	Diarylheptanoids	-	2.63865	3.38302	-0.744371	94997	79532.4	123812	92164	96412.2	96940.2	261664	660220	830422	821363	1.09564e+06	857599	210332	181166	85859.8	108937	80108.7	60521.8	42354.2	60657.7	95250.4	109756	71133.6	54769.9
M193T214_neg	Zingerone	Polyketides	Others	Zingiber derived compounds	-	2.99147	4.7764	-1.78493	27841.8	27841.8	27841.8	27841.8	27841.8	27841.8	46406.6	62918.4	51262.1	56087.9	49528	50174.8	9544.61	6471.45	6017.06	6419.03	5322.55	6006.95	959.63	2937.45	1428.3	3038.65	1407.75	1772.46
M313T64_pos	1-Dehydro-[6]-gingerdione	Polyketides	Phenolic lipids	Alkyl catechols and derivatives	ko00945(Stilbenoid, diarylheptanoid and gingerol biosynthesis);ko01110(Biosynthesis of secondary metabolites)	1.56467	2.54583	-0.981161	23729.1	17993.7	32974.8	28524.9	19873.4	25957.5	33339	51635.3	48161.6	41630	52785.5	53861.8	30064.3	15570.9	16034.4	13897.2	9567.07	9999.39	7941.37	8055.76	7309.63	7549	7936.55	9399.53
M375T41_pos	Hexahydrocurcumin	Polyketides	Phenolic lipids	Alkyl catechols and derivatives	-	1.74688	2.0975	-0.350625	2541.05	2541.05	2541.05	2541.05	2541.05	2541.05	6034.47	7525.62	4465.45	6380.38	6931.2	6253.02	3966.72	1721.84	1230.64	1565.95	1317.32	1397.38	1594.55	2105.56	1380.09	1805.01	920.328	977.867
M289T44_neg	5-O-Methylembelin	Polyketides	Phenolic lipids	Alkyl hydroquinones and derivatives	-	-0.153276	2.11064	-2.26392	5356.58	5356.58	5356.58	5356.58	5356.58	5356.58	4898.12	5996.05	5181.97	4838.59	6597.91	7807.06	5309.06	5832.01	5711.26	6624.24	8532.74	7269.44	1237.88	892.466	1622.79	1061.34	1970.68	1392.9
M320T156_pos	(15:1)-Cardanol	Polyketides	Phenolic lipids	Alkyl phenols and derivatives	-	0.206442	-2.31914	2.52558	3168.09	3168.09	3168.09	3168.09	3168.09	3168.09	2056.36	827.897	2571.11	2684.68	3271.53	2479.47	2118.66	1644.13	2006.94	3652.55	1805.5	811.203	8892.88	9519.92	10957.6	13931.8	13919.7	12099
M207T163_pos	Ibuprofen	Polyketides	Phenylpropanoic acids	Others	-	1.69398	4.0772	-2.38323	115166	99617.8	121338	110628	111058	111601	413461	471826	638327	900396	369693	376626	86904.1	159479	247089	193229	169779	123385	20573.8	25299.3	31325.7	40061.5	34243.8	36316.7
M683T524_pos	Natamycin	Polyketides	Polyenes	Polyenes	ko01052(Type I polyketide structures);	-0.683391	-2.90081	2.21741	564.766	564.766	564.766	564.766	564.766	564.766	285.603	219.809	238.542	136.19	76.439	183.606	305.509	364.367	228.196	215.763	276.869	440.338	1994.85	1902.51	1220.49	1120.13	908.119	1369.31
M259T42_neg	Khellin	Polyketides	Pyrones	Chromones	ko01060(Biosynthesis of plant secondary metabolites);	1.21844	-2.14952	3.36796	10522.1	12374.8	10393.9	10628.6	12565.7	10378.3	9511.88	7934.14	9047.35	7788.28	8267.45	7391.54	4509.63	2937.44	3319.7	4598.98	3081.06	3015.01	42277.1	33127.5	39718.1	34922.5	32951.7	38579.9
M229T27_neg	Visnagin	Polyketides	Pyrones	Chromones	ko01060(Biosynthesis of plant secondary metabolites);	-1.10663	2.13898	-3.24561	25334.3	25334.3	25334.3	25334.3	25334.3	25334.3	19143	27759	22615.4	28161.9	22617.3	24672.9	59939.3	54195.8	50067.4	49145.8	54070.5	44762	5471.01	5373.67	6057.8	5193.28	4661.85	6156.35
M395T329_pos	Aloesin	Polyketides	Pyrones	Chromones	-	4.84956	6.9675	-2.11795	21601.7	20610.9	16394.1	22653.8	19216.8	19760.8	160320	129565	98780.7	90066.5	71793.5	79122	3437.86	4296.68	4156.7	2947.2	3836.77	3163.93	1334.06	1109.91	681.417	710.992	620.052	574.753
M239T40_1_neg	Khellol glucoside;Khelloside	Polyketides	Pyrones	Chromones	-	-0.01559	2.22449	-2.24008	24974.1	24974.1	24974.1	24974.1	24974.1	24974.1	30342.5	26075.3	45765.4	73799.4	76166.4	65402.1	27395.4	30481.7	68280.2	68772.3	76379.5	49691.9	4654.23	5820.31	8257.56	24834.7	14058.9	10321.9
M144T256_pos	Maltol	Polyketides	Pyrones	Monocyclic gamma-pyrones	ko01110(Biosynthesis of secondary metabolites);ko00523(Polyketide sugar unit biosynthesis);	-1.68332	1.46221	-3.14553	13528.8	10866.2	13963.7	14439.5	12252.1	12867	12840.5	13503.1	15026.6	17464.2	15440.7	17631	22897.7	48742.3	52402.9	43296.9	75568.1	52264	10485.3	6078.32	4096.59	2796.72	5018.91	4880.19
M183T367_neg	Chelidonic_acid	Polyketides	Pyrones	Monocyclic gamma-pyrones	-	2.10783	2.80335	-0.695519	53348.7	55461.8	49889.8	53376.3	52539.9	53238.2	50463.2	65525.7	65738.6	66049.3	62230.8	63991.9	12091.7	13162.1	17015.4	15892.7	14734.7	13869.9	5709.87	11439.8	4303.46	12269.3	9579.15	10275.6
M381T369_neg	Bikaverin	Polyketides	Pyrones	Naphthopyrones	-	-0.358166	-2.50496	2.1468	8021.12	7059.78	6348.2	7573.98	7603.79	6964.35	3231.81	3138.98	2935.89	2747.31	3178.53	2753.81	4038.95	4097.16	3936.51	3865.57	3401.07	3715.53	11675.1	15798	16781.8	21631.7	15166.7	21043.4
M361T43_1_neg	Jacareubin	Polyketides	Pyrones	Xanthenes	-	2.52559	1.62661	0.898977	12430.2	12430.2	12430.2	12430.2	12430.2	12430.2	51398	25922.2	22046.1	25381.9	26725.5	27791.9	2516.12	7121.66	5220.71	4738.65	4814.9	6720.88	23282.3	16844.7	1256.24	2022.68	2649.52	11999.5
M309T309_neg	6-Deoxyjacareubin	Polyketides	Pyrones	Xanthenes	-	-2.38583	0.177078	-2.5629	19231.5	17010.5	21126.7	18703.5	18915.4	19005.7	7133.74	13103.9	2352.49	19289	17546.5	14423.3	63289.1	64238.2	82062.9	63381.2	59890.4	53105.3	9688.67	7049.59	12552.5	14432.6	12820.3	8775.34
M335T261_pos	Calophyllin_B	Polyketides	Pyrones	Xanthenes	-	1.00618	2.00026	-0.994076	8696.85	13108.3	11820.5	9804.66	10768.9	11002	14538	19535.7	16762.3	15705.6	20172.4	15942.5	5343.35	8416.73	10053	10002.1	8875.81	8417.8	1252	4744	5182.52	5077.5	4244.24	5159.25
M410T158_pos	Tamoxifen	Polyketides	Stilbenes	Others	ko00982(Drug metabolism - cytochrome P450);	2.06424	3.94504	-1.8808	55272.1	52459.3	32600.2	47293	47631.3	46104.7	378558	384215	164850	396012	332627	330463	58584.1	100102	97832.2	90009.9	65756.5	62766.3	22327	22454.8	23987	20196.4	14161.6	25865.3
M426T192_pos	Tamoxifen	Polyketides	Stilbenes	Others	ko00982(Drug metabolism - cytochrome P450);	0.290301	2.25935	-1.96905	10482.8	9621.69	8961.67	10505	9628.28	9767.2	29471	17094.4	15266.9	14914.6	20314.6	14887.5	26954.5	12261	14267	15427.7	8270.42	14363.6	1090.8	5123.47	3177.1	4746.53	4400.01	4844.47
M273T374_neg	Dihydropinosylvin	Polyketides	Stilbenoids	Bibenzyls	-	-0.27799	-4.09038	3.81239	6889.77	5981.98	6557.16	6720.16	6900.36	6264.15	3076.78	2501.16	2794.81	359.759	2220.88	2044.93	2681.73	3024.93	3274.03	1444.47	1591.09	3744.28	43263.5	28851.5	40168.8	35678.1	34485.5	38971.8
M472T365_pos	Gnetin_A	Polyketides	Stilbenoids	Stilbenoid dimers, stilbenoid oligomers and bis(bibenzyl)s	-	-0.567307	3.56578	-4.13308	1666.05	1068.54	1399.31	1215.42	1339.93	1385.49	3825.41	4005.37	3301.29	3054.63	2658.35	2364.98	1822.43	4989.5	5205.01	6741.09	5008.52	4698.02	431.455	362.815	258.626	226.005	106.64	236.725
M439T409_neg	Marchantin_A	Polyketides	Stilbenoids	Stilbenoid dimers, stilbenoid oligomers and bis(bibenzyl)s	-	-2.24621	-2.70569	0.459478	4134.91	3718.01	5163.6	4608.18	3576.96	4642.84	6389.05	3233.71	1386.51	2378.44	2076.56	1876.84	11730.6	12941	15193.5	12893.2	15003	14511.2	18375.1	21301	20441.9	19452.8	18073	15484.4
M696T438_neg	Copalliferol_B	Polyketides	Stilbenoids	Stilbenoid dimers, stilbenoid oligomers and bis(bibenzyl)s	-	0.506046	-2.8023	3.30834	915.979	995.966	819.145	1132.34	837.036	946.256	761.995	574.867	445.151	646.824	575.804	547.676	318.69	367.11	479.996	437.366	386.345	511.856	2315.64	4026.55	3787.7	4898.68	5098.08	4652.55
M703T512_pos	Canaliculatol	Polyketides	Stilbenoids	Stilbenoid dimers, stilbenoid oligomers and bis(bibenzyl)s	-	0.286198	2.57883	-2.29263	3186.47	2654.29	3141.18	3007.86	3011.18	2971.99	9553.81	8602.44	9436.85	7829.36	8376.11	7916.16	1720.02	6244.29	8876.5	7489.01	8798.22	9281.17	1795.27	1464.54	1434.54	1622.11	1493.08	846.296
M343T141_neg	3,4,3'-Tri-O-methylellagic_acid	Polyketides	Tannins and galloyl derivatives	Ellagitannins	-	6.50187	4.98349	1.51838	379625	555466	400156	428419	359774	484575	898573	908358	897955	723843	759601	896813	8320.17	10564.7	7827.42	10315.2	9554.33	9528.67	16300.9	36529.7	17739.8	60663.8	12462.6	17042.4
M127T370_pos	Pyrogallic acid;1,2,3-Trihydroxybenzene;Pyrogallol;1,2,3-Benzenetriol	Polyketides	Tannins and galloyl derivatives	Gallotannins	ko00627(Aminobenzoate degradation);ko01120(Microbial metabolism in diverse environments);ko07216(Catecholamine transferase inhibitors);	-0.801266	-3.98709	3.18582	14515.3	14249.5	14683.3	14065.8	14611.3	14418	2212.14	2053.38	2353.16	2488.37	2161.49	2432.67	2286.05	4201.81	4774.01	4158.69	3941.28	4514.33	36558.5	32954.9	37436.1	37711.1	38034.1	34571.9
M169T38_neg	Gallate	Polyketides	Tannins and galloyl derivatives	Galloyl derivatives	ko00627(Aminobenzoate degradation);ko01061(Biosynthesis of phenylpropanoids);ko00999(Biosynthesis of various plant secondary metabolites);ko01120(Microbial metabolism in diverse environments);	0.15757	2.78475	-2.62718	111841	103184	106707	106478	108210	107030	165524	213567	187579	195430	195695	166942	184183	165115	186820	149814	167659	154773	21708.6	33430.3	19441.5	34479.5	27632	26522.6
M263T105_neg	Abscisate;Abscisic acid;(+)-Abscisic acid;ABA	Terpenoids	Carotenoids and apocarotenoids	Apocarotenoids	ko01060(Biosynthesis of plant secondary metabolites);ko01110(Biosynthesis of secondary metabolites);ko00906(Carotenoid biosynthesis);ko01100(Metabolic pathways);ko04075(Plant hormone signal transduction);ko01070(Biosynthesis of plant hormones);	0.161719	2.14864	-1.98692	160226	160226	160226	160226	160226	160226	132759	200733	112485	146267	80256.1	145863	95584.3	169303	133903	87327.6	101369	144096	25969.2	35533.1	31807.5	30053.7	27479.4	33718.6
M417T420_pos	Bixin	Terpenoids	Carotenoids and apocarotenoids	Apocarotenoids	-	-1.35943	-3.97524	2.61581	1350.44	2236.19	1481.21	1732.74	1549.74	1686.97	395.465	548.447	319.593	414.718	407.157	273.845	657.51	1041.75	1147.07	592.827	1351.35	1262.89	7523.73	6016.4	6605.38	5946.91	5493.57	5519.23
M313T40_pos	Montanin_A	Terpenoids	Diterpenoids (C20)	Clerodanes	-	2.22191	3.26922	-1.0473	52822.7	52822.7	52822.7	52822.7	52822.7	52822.7	146908	120793	160977	138897	137988	140850	40012.3	30261.6	29366.8	31767.5	22866.9	27159.7	12009.4	13906	12358.7	15924	18293.6	15299.5
M531T325_pos	Palmatoside_G	Terpenoids	Diterpenoids (C20)	Clerodanes	-	-0.209933	-2.27278	2.06284	5303.52	4727.55	2355.17	5506.72	3980.52	4023.47	2884.53	1921.59	1390.99	882.153	864.889	622.039	3024.75	2438.07	973.981	1087.51	1262.4	1121.24	7950.64	7167.17	6898.29	6098.1	6872.53	6409.57
M329T39_neg	Gibberellin_A7	Terpenoids	Diterpenoids (C20)	Gibberellins	ko01110(Biosynthesis of secondary metabolites);ko00904(Diterpenoid biosynthesis);	1.89128	2.05133	-0.160049	41672.9	40206.8	37702.2	40386.5	39839.3	40076.7	105968	78187.9	112719	78515.6	97868	89424.6	28310	27009	21946.5	25494.7	25455.3	23465.8	21252.1	17877.1	19409.6	37227.2	18506.4	21481.5
M361T188_neg	Gibberellin_A19	Terpenoids	Diterpenoids (C20)	Gibberellins	ko00904(Diterpenoid biosynthesis);ko01100(Metabolic pathways);ko01110(Biosynthesis of secondary metabolites);	-3.25717	-1.6586	-1.59857	18407.2	18407.2	18407.2	18407.2	18407.2	18407.2	9853.84	12841.5	11046.8	11561.9	8432.14	9512.1	106251	99470.3	97177.5	96378.8	92522.1	112920	41238.8	36671.7	27448.3	31342.9	27927.7	35051.8
M365T232_pos	Gibberellin_A8	Terpenoids	Diterpenoids (C20)	Gibberellins	ko00904(Diterpenoid biosynthesis);	0.830676	3.07592	-2.24524	3413.05	4798.74	3296.07	3026.31	3945.43	3733.67	8818.95	6849.71	7877.61	4248.91	6398.65	6526.93	3394.09	3870.85	5631.75	4256.66	3187	2555.54	676.766	753.423	713.915	985.012	962.073	737.969
M425T222_pos	Ginkgolide_B	Terpenoids	Diterpenoids (C20)	Ginkgolides	-	-2.28868	-6.70105	4.41236	21822.5	20893.8	15597.3	21812.9	19410.8	19501.4	2741.34	2155.6	1980.72	1579.65	1214.74	1324.99	12035	12971.3	3925.96	10065.5	3556.72	11178.1	221041	219985	190630	162054	165874	184588
M349T167_pos	Bilobalide	Terpenoids	Diterpenoids (C20)	Ginkgolides	-	7.26024	5.84491	1.41534	547676	537516	545999	544078	543912	543711	1.16144e+06	1.16724e+06	966021	1.00358e+06	1.18568e+06	1.26946e+06	9841.76	8652.57	6263.82	7830.37	2234.63	9229.53	14766.1	31274.6	5169.78	23556.9	21322.3	21408.5
M307T37_neg	Sclareol	Terpenoids	Diterpenoids (C20)	Labdanes	ko00904(Diterpenoid biosynthesis);ko01110(Biosynthesis of secondary metabolites);	1.45011	-1.39394	2.84404	3846.36	3569.65	3536.4	2983.7	3872.63	3582.58	3883.49	2488.46	2977.05	1380.38	2232.31	3468.23	1479.65	377.799	667.826	409.485	1573.48	1505.02	4870.98	9451.38	6806.91	8057.89	7671.12	6318.73
M458T233_pos	Hallactone_B	Terpenoids	Diterpenoids (C20)	Others	-	0.671189	2.97072	-2.29953	3869.5	5406.65	3458.41	4726.04	4407.91	4061.35	3745.16	6644.4	7162.93	13476.9	3577.15	6999.17	3500.03	5350.7	6309.56	4887.89	3730.85	2348.89	792.296	859.066	788.432	1000.7	897.35	969.494
M361T40_neg	Enmein	Terpenoids	Diterpenoids (C20)	Others	-	5.5683	5.42443	0.143875	190758	202127	197636	195622	195383	197072	439409	388292	495001	413635	441992	480218	8865.48	10341.1	8957.73	10393.2	8957.3	8515	5700.55	13848.2	6571.45	14938.8	9685.68	11160.8
M395T155_pos	Podolactone_B	Terpenoids	Diterpenoids (C20)	Others	-	0.838883	2.52794	-1.68905	68164.4	69373.3	63680.3	69102.8	62135.9	69960.8	123921	95488.3	121216	93837.1	106306	111727	50017.8	64635.2	64664	69877.9	70604.3	44995.9	16947.2	19502.6	16832.8	20198.7	20020.3	19632.5
M525T221_pos	Mascaroside	Terpenoids	Diterpenoids (C20)	Others	-	0.312185	2.44497	-2.13279	17376	17376	17376	17376	17376	17376	34268.5	33775.3	23908.6	25552.6	25784.8	27389.1	22314.8	23935.1	29851.5	23267.3	25750.7	12348.9	6342.82	6930.29	4088.97	4259.37	4305.93	5417.71
M275T461_pos	Podocarpic_acid	Terpenoids	Diterpenoids (C20)	Podocarpanes	-	-1.4198	-2.71383	1.29404	7883.47	6653.75	6849.57	6030.65	7629.66	6960.12	3355.57	3331.15	4579.34	4953.19	1705.89	2483.61	13260.7	14677.5	8373.36	6780.89	5565.52	5945.04	17182.8	24477.3	27466.5	20903.8	22171.9	21691.8
M585T43_2_neg	Baccatin_III	Terpenoids	Diterpenoids (C20)	Taxanes	ko00904(Diterpenoid biosynthesis);ko01100(Metabolic pathways);ko01110(Biosynthesis of secondary metabolites);	1.14762	-0.8601	2.00772	13166.4	12613.2	14795.3	13073.3	16162.2	12206.4	16993.5	15776.6	17997.5	13475.4	18403.9	16866.8	7790.32	7556.02	7760.42	5538.88	7173.04	9098.86	35616.6	20750.5	36094.8	24587.6	34762.8	28821.4
M565T43_neg	10-Deacetylbaccatin_III	Terpenoids	Diterpenoids (C20)	Taxanes	ko00904(Diterpenoid biosynthesis);ko01100(Metabolic pathways);ko01110(Biosynthesis of secondary metabolites);	-0.642195	-2.91368	2.27149	4160.06	3695.22	4664.22	2888.04	4373.98	4064	2421.89	1858.81	3335.34	1740.74	2009.01	2735.96	3173.16	4026.67	3374.39	3159.6	3302.24	4972.56	18066.4	14040.2	24997.5	16169	15179.4	17809.6
M551T455_pos	Pedilstatin	Terpenoids	Diterpenoids (C20)	Tiglianes	-	-0.202345	-4.29706	4.09471	4336.3	4781.02	4002.98	4306.97	4676.22	4232.8	938.8	1129.19	1035.83	804.942	1582.44	936.344	812.648	1322.99	1347.04	1785.6	420.88	1706.17	22479.5	21251.9	21451.1	19475.2	21123.7	20572.7
M683T503_pos	12-O-Palmitoyl-16-hydroxyphorbol_13-acetate	Terpenoids	Diterpenoids (C20)	Tiglianes	-	-2.37318	-8.75572	6.38254	6012.26	6798.22	6754.8	7321.64	5686.12	6900.58	95.7733	87.0324	55.2295	82.1321	49.6873	55.4831	397.429	437.675	417.408	379.217	280.848	291.021	33213.6	34404.4	28441.4	28683.5	27372	31737.5
M165T241_neg	Myrtenic_acid	Terpenoids	Monoterpenoids (C10)	Cyclic monoterpenes	ko00907(Pinene, camphor and geraniol degradation);	2.40186	3.44492	-1.04306	8713.65	9357.56	8017.68	8249.88	8906.89	8627.82	11717.8	5415.48	14777.9	12907.6	10766.7	13143.4	2233.92	2064.37	2486.98	2082.85	2180.66	1956.1	1032.11	1118.29	1057.86	1193.18	999.597	910.215
M330T146_neg	(+)-Bornyl-diphosphate	Terpenoids	Monoterpenoids (C10)	Cyclic monoterpenes	ko01100(Metabolic pathways);ko00902(Monoterpenoid biosynthesis);ko01110(Biosynthesis of secondary metabolites);	2.92031	2.84447	0.0758475	59026.4	64802.3	62094.6	61754	61815.2	61778.4	98717.9	96105.9	88535.4	90409.1	92868.2	90207.7	13227.8	9835.19	12972.2	6279.36	8053.52	23190.1	6171.25	19241.2	15989.4	21954.5	8471.16	5701.36
M413T416_pos	Monotropein	Terpenoids	Monoterpenoids (C10)	Iridoids	-	1.26596	2.00248	-0.736526	1552.11	1308.72	1411.09	1231.72	1500.78	1396.62	4181.5	2682.77	4836.83	2670.84	3183.87	3391.09	1581.52	1524.01	1275.93	1343.84	1786.09	1198.83	776.371	883.509	1134.54	1017.57	711.626	704.109
M436T265_neg	Lamioside	Terpenoids	Monoterpenoids (C10)	Iridoids	-	0.137981	4.74834	-4.61036	5357	6377.79	7026.33	7870.82	5719.58	6315.95	11518.5	16902.3	13305	11612.9	11980.3	11692.9	13901.3	11976.4	12387.5	10013.6	11725.9	9982.85	195.333	669.34	82.0604	606.737	786.963	524.818
M495T233_pos	Harpagoside	Terpenoids	Monoterpenoids (C10)	Iridoids	-	1.06218	4.02189	-2.95972	2799.95	2799.95	2799.95	2799.95	2799.95	2799.95	6411.55	7491.14	8979.19	6407.7	9809.91	7396.04	1855.97	3407.24	6960.96	4105.16	3832.4	2105.38	546.217	421.372	292.826	614.999	516.417	470.373
M347T314_pos	Aucubin	Terpenoids	Monoterpenoids (C10)	Iridoids	-	2.75194	2.89833	-0.146395	17749.5	17749.5	17749.5	17749.5	17749.5	17749.5	126002	122123	81617.2	72618.5	63724.9	65071.8	14646.7	14985.6	15249.3	8126.74	14129.7	11713.1	32400.8	2692.27	18158.2	2396.49	14568	1026.67
M388T313_pos	Deutzioside	Terpenoids	Monoterpenoids (C10)	Iridoids	-	2.3844	5.06843	-2.68403	3316.48	2706.48	3140.39	2891.32	3129.92	3016.19	10709.8	14218.8	11976.5	15048.9	20496.2	21565.9	1485.78	2076.56	5753.47	2814.39	2803.32	3072.88	398.343	274.917	438.4	450.858	715.107	524.273
M413T294_neg	Asperuloside	Terpenoids	Monoterpenoids (C10)	Iridoids	ko00902(Monoterpenoid biosynthesis);ko01110(Biosynthesis of secondary metabolites);	0.921386	2.56421	-1.64282	9470.33	6928.76	8316.94	8470.58	9834.47	7483.11	9428.85	8079.92	12176.5	11182	11458.1	10779.3	5996.45	6768.96	4406.21	6245.51	5477.92	4424.25	2012.01	2673.56	1042.86	794.686	1482.87	2663.85
M373T364_neg	Geniposidic_acid	Terpenoids	Monoterpenoids (C10)	Iridoids	ko01110(Biosynthesis of secondary metabolites);ko00902(Monoterpenoid biosynthesis);	0.582552	3.3007	-2.71815	21617	25413.3	21850.3	23076.5	22989	22825.9	33610.8	34205.8	32662.7	36537.6	42206.1	39974.5	25706.2	20026.9	23270.4	22734	27554.9	27083.5	4547.6	3637.24	2673.08	4804.71	3223.06	3359.01
M399T259_pos	Loganate	Terpenoids	Monoterpenoids (C10)	Iridoids	ko01110(Biosynthesis of secondary metabolites);ko00902(Monoterpenoid biosynthesis);	0.45852	2.41196	-1.95344	30760.4	30760.4	30760.4	30760.4	30760.4	30760.4	52375.6	44852.6	46636.9	42592.4	50501.4	48751.3	30144.1	34948.1	34772.7	41196.2	31373.4	35486	7250.97	8848.76	8609.8	9641.13	9001.04	10333.5
M397T156_pos	Deoxyloganin	Terpenoids	Monoterpenoids (C10)	Iridoids	ko00902(Monoterpenoid biosynthesis);ko01110(Biosynthesis of secondary metabolites);ko01100(Metabolic pathways);	2.74347	3.98765	-1.24418	76778.1	79730.5	73253.2	77408.9	73220.7	78541.4	165744	145320	155462	134980	149715	151989	16292.7	32679.2	35877.8	24014.6	17368.6	8638.87	7918.34	10459.3	7763.06	10511.6	10265	10018.7
M227T41_pos	Genipin	Terpenoids	Monoterpenoids (C10)	Iridoids	-	-0.241732	-2.28286	2.04113	5067.86	5067.86	5067.86	5067.86	5067.86	5067.86	1845.15	2669.52	3719.97	3820.58	3869.65	3093.12	3764.75	3375.26	3451.54	4109.32	3802.77	3983.46	11764.6	11874.5	17425.9	17003.7	17681.6	16799.2
M465T221_neg	Agnuside	Terpenoids	Monoterpenoids (C10)	Iridoids	-	2.83218	2.98294	-0.15076	9019.9	9019.9	9019.9	9019.9	9019.9	9019.9	14316.4	14164.8	12670.2	14991.7	12202.3	12020.6	2892.07	1706.67	1784.31	1898.21	1385.29	1618.43	2029.8	2004.16	1586.31	1770.95	1287.94	1486.08
M429T258_pos	Ipolamiide	Terpenoids	Monoterpenoids (C10)	Iridoids	-	1.17497	2.17428	-0.999313	17936.3	18829.7	16293.8	18151.3	17745.6	17708.2	34189	35697.8	32939.4	30303.1	29745.8	29486.4	10578.9	12431	15863.4	13387	12006.7	20928.6	22606.3	3661.02	4433.29	4132.97	3434.46	4350.04
M423T103_pos	Valtratum	Terpenoids	Monoterpenoids (C10)	Iridoids	-	-2.59469	2.1406	-4.7353	34295.6	44975.5	21067.8	35488.1	33138.1	32245.9	29285.4	24540.2	20252.2	1939.21	25511.8	31041.5	135137	138536	128969	110600	49057.7	238506	1855.52	2029.03	5736.8	7812.61	2987.49	9643.52
M493T255_pos	Plumieride	Terpenoids	Monoterpenoids (C10)	Iridoids	-	6.45107	5.07307	1.378	72742.2	79543.8	49797.1	79714.4	64137.3	68390.9	174742	220462	166263	206044	211040	187109	2097.7	1237.88	2680.97	1266.34	2868.01	3172.19	2451.61	9712.53	2316.81	8852.22	5546.71	5747.93
M405T303_pos	Gardenoside	Terpenoids	Monoterpenoids (C10)	Iridoids	-	0.992716	3.35519	-2.36247	5474.24	5474.24	5474.24	5474.24	5474.24	5474.24	9314.09	6867.59	24620.4	18569.8	8384.77	14774.1	5489.3	7272.29	8812.61	9384.26	3570.39	6945.37	1464.33	1195.45	1592.05	1265.55	904.638	1642.94
M464T188_pos	Paederoside	Terpenoids	Monoterpenoids (C10)	Iridoids	-	6.74559	4.28109	2.4645	35805.8	37132.2	32371.4	41107.2	34290.3	35492.9	98832.6	94006	88962.8	92466.7	86057.2	70880.8	1069.91	837.55	981.784	747.698	706.975	606.46	1108.85	8176.98	1056.86	7180.93	4309.63	5489.67
M326T246_pos	Allamandin	Terpenoids	Monoterpenoids (C10)	Iridoids	-	1.47807	2.48873	-1.01065	3346.52	3725.21	3438.44	3542.85	3471.06	3506.61	6119.35	4426.41	6589.18	4355.12	5802.03	5704.26	1154.21	3377.84	1681.68	1961.69	2053.38	1615.83	1656.92	1131.61	693.251	845.641	722.712	828.609
M481T450_neg	Catalposide	Terpenoids	Monoterpenoids (C10)	Iridoids	-	2.45443	1.35334	1.10109	10323.9	10323.9	10323.9	10323.9	10323.9	10323.9	20896.3	23402.1	23722.6	25375.7	23903.2	23260	5883.36	3743.14	4457.84	4366.94	3706.58	3487.18	12235.6	11028.2	6626.01	7766.2	10056.8	7300.18
M192T176_neg	Geranyl_diphosphate	Terpenoids	Monoterpenoids (C10)	Linear monoterpenes	ko00900(Terpenoid backbone biosynthesis);ko01110(Biosynthesis of secondary metabolites);ko00902(Monoterpenoid biosynthesis);ko01060(Biosynthesis of plant secondary metabolites);ko01070(Biosynthesis of plant hormones);ko01100(Metabolic pathways);ko00130(Ubiquinone and other terpenoid-quinone biosynthesis);	4.25664	3.04278	1.21386	16469.6	14300.9	19531.4	12586.3	20938.8	14731.8	20198.4	41817.6	23224.3	42776	18844.1	19306.4	1503.9	1526.47	1519.23	1397.8	1382.36	1363.21	3352.46	3570.88	2291.6	3324.37	3650.75	3973.96
M387T344_2_neg	Secologanin	Terpenoids	Monoterpenoids (C10)	Secoiridoids	ko00901(Indole alkaloid biosynthesis);ko01060(Biosynthesis of plant secondary metabolites);ko01100(Metabolic pathways);ko01110(Biosynthesis of secondary metabolites);ko00950(Isoquinoline alkaloid biosynthesis);ko00902(Monoterpenoid biosynthesis);	2.45883	1.82167	0.637162	9516.11	10350	9368.43	12185.8	9186.95	9965.26	15934.6	16985.6	26828.2	18390	29261.7	27595.2	4488.52	4389.17	2329.15	5379.22	3577.1	4391.66	11842.9	813.086	946.459	10133.2	12339.7	2114.05
M415T430_neg	Lophotoxin	Terpenoids	Others	Others	-	0.949554	-1.41371	2.36326	38092.3	40012.6	35266.3	39946.4	33952.4	39995.5	45228.1	39021.5	40582.4	36788	39666.5	41294.5	19646.1	19487.1	19892.6	20936.8	21975.8	23668.2	105668	98368.9	114357	101859	116869	109166
M761T436_2_pos	all-trans-Octaprenyl_diphosphate	Terpenoids	Others	Polyterpenoids	ko01110(Biosynthesis of secondary metabolites);ko00130(Ubiquinone and other terpenoid-quinone biosynthesis);ko00900(Terpenoid backbone biosynthesis);	-3.50163	-10.8971	7.39551	20182.8	19151.9	20180.8	19734.6	19830.4	19837	56.8027	95.8076	48.0665	46.1897	52.8993	41.218	713.41	611.834	705.25	719.356	602.455	509.857	116227	89653.2	122792	100004	107317	114289
M328T39_neg	all-trans-Hexaprenyl_diphosphate	Terpenoids	Others	Polyterpenoids	ko00130(Ubiquinone and other terpenoid-quinone biosynthesis);ko00900(Terpenoid backbone biosynthesis);ko01110(Biosynthesis of secondary metabolites);	1.79187	2.05751	-0.265633	7846.91	8793.83	8633.49	8396.95	8464.8	8333.9	18209.7	15712.1	19785.2	13402.1	18433.1	16366.3	5048.57	5365.08	4766.19	4581.66	5363.72	4305.62	5132.6	7821.72	3204.27	2720.58	1698.08	3904.32
M273T256_neg	Protopanaxatriol	Terpenoids	Others	Triterpenoid saponin	ko01110(Biosynthesis of secondary metabolites);ko00999(Biosynthesis of various plant secondary metabolites);	-3.31504	-2.50643	-0.808612	2935.8	2935.8	2935.8	2935.8	2935.8	2935.8	697.062	924.971	732.608	705.828	1021.7	608.908	10201.9	4428.9	7052.61	8691.86	7638.86	8673.29	5522.65	4473.66	4594.77	2596.9	4535.12	4932.16
M261T37_neg	Farinosin	Terpenoids	Sesquiterpenoids (C15)	Eudesmanes	-	-1.56583	0.467606	-2.03343	5439.95	4278.47	5201.57	4732.65	5058.18	4913.03	5053.14	5072.89	6316.3	4514.27	5165.01	4371.26	18600.8	13424.1	18343.5	13012.9	13163.9	13728	3905.48	1983.83	4686.03	2030.64	4611.93	4833.42
M230T160_neg	Erioflorin_acetate	Terpenoids	Sesquiterpenoids (C15)	Germacrenes	-	1.85098	2.33913	-0.488154	8562.09	3827.89	8431.83	5572.95	6753.04	6434.36	13180.7	17815.1	20459.6	23649.2	15618.5	16792.7	4719.37	5262.42	5987.92	5110.47	4380.02	4343.58	3205.79	3147.26	4478.1	3628.92	3301.43	3486.71
M293T428_pos	Dihydromikanolide	Terpenoids	Sesquiterpenoids (C15)	Germacrenes	-	-0.64154	-2.00193	1.36039	1434.85	1434.85	1434.85	1434.85	1434.85	1434.85	1222.35	1614.72	2317.5	1812.44	1136.79	1380.77	1493.64	2965.81	4406.98	2562.99	1922.41	1444.02	5463.82	8508.65	7624.84	5338.43	5737.53	5315.86
M419T43_neg	Eupacunolin	Terpenoids	Sesquiterpenoids (C15)	Germacrenes	-	1.33442	-0.741946	2.07637	6531.71	6056.1	5740.09	6305.25	5827.41	6295.79	8386.21	7714.63	11029	7171.54	8615.2	5445.98	3313.61	3012.13	4344.59	3297.36	2063.71	3146.87	14157.2	11052.6	13566.1	13536.1	13541.9	15029.2
M421T222_pos	Eupacunoxin	Terpenoids	Sesquiterpenoids (C15)	Germacrenes	-	-0.00963132	-3.05879	3.04916	2524.46	2008.23	2774.72	2569.92	2335.77	2434.24	813.949	1448	808.733	907.08	2101.26	1522.46	589.883	980.819	1068.06	1184.57	1300.26	2528.81	9350.91	11658.4	9399.48	8909.09	11823.4	12200
M443T387_pos	Hiyodorilactone_A	Terpenoids	Sesquiterpenoids (C15)	Germacrenes	-	-0.314466	-3.34696	3.03249	305.26	455.887	657.086	396.331	472.446	418.794	200.571	153.351	132.81	109.31	130.78	107.019	230.579	161.412	197.85	121.148	101.342	224.594	1731.67	1247.97	1405.83	922.463	1265.73	1910.7
M465T163_pos	Glaucolide_A	Terpenoids	Sesquiterpenoids (C15)	Germacrenes	-	-3.62536	0.364422	-3.98979	29357.3	29357.3	29357.3	29357.3	29357.3	29357.3	21672.2	13561.4	17278.9	12725.2	11663.2	20836.7	153032	179902	228043	207017	224987	213181	11357.1	8345.62	16521.1	8962.16	11660.3	19074.4
M465T306_pos	Enhydrin	Terpenoids	Sesquiterpenoids (C15)	Germacrenes	-	0.990136	2.14513	-1.155	6127.04	7069.43	4796.24	6049.88	5969.32	5994.64	16702	19232.3	18630.8	16723.4	17662.3	14461.4	11937	5883.04	11184.1	8623.38	8914.12	5519.28	3405.61	4084.97	3977.13	4657.44	3361.56	3892.13
M377T196_neg	Niveusin_C	Terpenoids	Sesquiterpenoids (C15)	Germacrenes	-	-2.31935	-2.12763	-0.191718	1612.16	1612.16	1612.16	1612.16	1612.16	1612.16	1267.4	1013.02	1602.84	1409.28	604.286	922.613	6132.94	4849.87	8504.32	5349.67	3871.41	5327.98	4376.97	5028.83	4530.91	5456.75	5063.42	5343.92
M345T411_pos	epi-Tulipinolide_diepoxide	Terpenoids	Sesquiterpenoids (C15)	Germacrenes	-	-0.946071	-2.10595	1.15988	2180.49	2380.68	2089.73	2003.92	2323.8	2172.57	952.178	1449.66	1053.17	1305.61	1369.31	1432.63	1839.47	2380.38	2443.99	2520.13	2572.54	2813.65	4713.95	5202.05	4981.11	5769.77	6201.22	5687.25
M393T88_pos	Viguiestenin	Terpenoids	Sesquiterpenoids (C15)	Germacrenes	-	-1.17109	1.24641	-2.41749	31996.4	31416.8	26110.1	35055.6	23174.1	34080.9	33789.9	30613.2	35294.5	26077.5	31886.7	35838.4	41893.5	78789.5	94698.1	53482.9	105961	60900.9	10464.8	8484.78	14482	18962.7	18853	10312.6
M461T409_pos	Glaucolide_B	Terpenoids	Sesquiterpenoids (C15)	Germacrenes	-	0.396282	2.25218	-1.8559	1592.87	1849.09	1310.6	1752.25	1357.12	1707.12	3354.95	3968.09	4402.23	5070	4698.46	4861.22	1756.26	2501.44	3295.08	2710.02	5145.72	4616.34	877.498	924.224	1014.84	903.953	845.787	965.762
M581T310_neg	Melampodinin	Terpenoids	Sesquiterpenoids (C15)	Germacrenes	-	-0.464047	-3.01567	2.55162	6391.49	6391.49	6391.49	6391.49	6391.49	6391.49	737.528	760.439	689.365	1035.45	1219.09	1608.28	1023.51	848.914	1438.09	1528.99	1762.06	1744.06	4988.06	6169.37	5840.64	13500.4	8938.72	9492.51
M649T88_neg	Thapsigargin	Terpenoids	Sesquiterpenoids (C15)	Guaianolide	-	0.405564	3.05697	-2.65141	12218.8	12046.3	12181.7	12152.7	12155.6	12147.5	16482.1	10103.4	9360.49	13970.2	8678.67	25124.2	11077	9325.04	11737	6753.31	10930.7	13379.9	1096.89	2144.39	786.861	2380	1794.05	1857.47
M231T263_pos	Dehydrocostus_lactone	Terpenoids	Sesquiterpenoids (C15)	Guaianolide	-	2.56048	3.0073	-0.446821	8024.92	10170.6	8870.91	7699.86	9107.44	8899.7	15649.2	19510.3	18191.2	21892.3	25241.5	22474.9	3005.85	3745.7	3562.43	3556.1	3966.93	3006.9	1673.78	3073.04	1899.51	3627.9	3125.2	1892.87
M337T307_pos	Chlorochrymorin	Terpenoids	Sesquiterpenoids (C15)	Guaianolide	-	0.403568	2.31378	-1.91021	13205.3	12742.3	16487.1	13713	13778.9	13990.3	30845.1	21553.3	32251.8	19764.3	35716.5	21540.1	16059.1	21319.2	34544.8	11510.9	12565.4	26221.7	5243.82	4387.76	6004.62	4839.93	6385.6	5655.58
M415T43_pos	Eupatoroxin	Terpenoids	Sesquiterpenoids (C15)	Guaianolide	-	-1.06712	-2.67718	1.61006	5397.31	5397.31	5397.31	5397.31	5397.31	5397.31	172.606	2670.16	1298.07	3217.4	3847.21	2652.29	7405.54	3373.47	4355.51	4531.76	3310.98	6058.16	12664.3	14610.2	16376	15620.6	13798.5	15565
M437T141_pos	Polhovolide	Terpenoids	Sesquiterpenoids (C15)	Guaianolide	-	-0.766082	1.96828	-2.73436	26420.6	26420.6	26420.6	26420.6	26420.6	26420.6	27029.7	20055.7	35415.6	29297.6	43557.1	41956.9	40673.8	40680.8	48836	61199.6	54610.4	89558	6598.94	6659.62	7571.31	8122.17	9809.98	11662.9
M450T187_neg	Chlorohyssopifolin_A	Terpenoids	Sesquiterpenoids (C15)	Guaianolide	-	3.23124	2.50103	0.730215	14892.7	14892.7	14892.7	14892.7	14892.7	14892.7	22957	19687.9	15513.8	15525.6	16804.5	25799.1	2791.38	1856.16	2001.52	1580.36	1930.47	2223.31	1405.51	1770.46	3812.87	4136.94	4459.79	4956.77
M587T209_pos	Archangelolide	Terpenoids	Sesquiterpenoids (C15)	Guaianolide	-	-0.359095	2.50746	-2.86655	8776.84	7080.18	6155.66	9948.79	6456.63	7818.21	13949.3	13692.7	8508.33	16452.5	13926.2	9880.33	13244.7	36233.4	18729.2	13586.5	10562.2	5648.27	2115.12	3040.91	2166.84	2032.76	1971.26	2110.86
M299T392_pos	Hemigossypol	Terpenoids	Sesquiterpenoids (C15)	Others	-	-1.09951	-3.81366	2.71415	3792.28	2928.07	3444.57	3718.62	3321.84	3405.09	773.769	477.318	500.595	718.678	629.345	645.172	691.248	663.098	1633.22	1814.69	1453.36	1768.98	9400	9213.77	8499.01	7392.98	10464.2	7687.84
M305T429_2_pos	Qing_Hau_Sau	Terpenoids	Sesquiterpenoids (C15)	Others	-	-1.67134	-3.18225	1.51091	8422.88	8422.88	8422.88	8422.88	8422.88	8422.88	2886.43	3848.25	4106.74	3926.36	3513.18	6190.39	3491.33	10787.8	14862.7	16404.1	15530	16867.8	34934.5	37633	40407.9	33666.1	37082.7	38407.5
M263T165_pos	Phaseic_acid	Terpenoids	Sesquiterpenoids (C15)	Others	ko00906(Carotenoid biosynthesis);	-2.88268	0.552393	-3.43507	21687.6	21687.6	21687.6	21687.6	21687.6	21687.6	13244.8	10400	12580.9	13754.7	9334.41	10472.3	113571	94589.7	85529	75662.1	62330.5	83011.3	14194.4	9416.59	844.541	5702.7	8481.81	8946.93
M333T45_1_pos	Picrotin	Terpenoids	Sesquiterpenoids (C15)	Others	-	4.03927	2.05027	1.989	17126.8	13811.7	18248.1	16599.1	16442.7	16118.4	26270.9	48931	31441.8	56258.3	34522.7	36355.9	2486.75	1556.74	1820.14	4727.18	1660.35	1967.75	11243.7	1435.23	11472	11207.9	9801.68	11282.9
M387T42_neg	Alectrol	Terpenoids	Sesquiterpenoids (C15)	Others	-	1.2298	-0.790163	2.01997	5908.89	5206.54	8771.9	5238.51	6663.98	6234.3	5479.55	2260.18	2083.35	21477.5	6896.65	20821.7	4321.79	4109.88	3260.04	3820.35	3681.83	5970.32	16788.6	15501.8	25197.6	12639.1	17298.3	14634.3
M329T297_neg	Cinnamodial	Terpenoids	Sesquiterpenoids (C15)	Others	-	3.10908	4.11758	-1.00851	21836.8	21836.8	21836.8	21836.8	21836.8	21836.8	62231.5	81845.1	27405.1	36655.9	37694	42294.6	27007.2	1361.49	929.747	1139.85	1451.42	1503.43	4779.04	2607.7	2068.55	1723.77	2218.39	3200.96
M489T211_pos	Laserpitin	Terpenoids	Sesquiterpenoids (C15)	Others	-	-1.82098	2.41649	-4.23747	40723.5	41269.6	32557.9	43190.4	37572.1	38590.7	24114.9	8099.49	39454.6	31065	36719.7	32270.1	73460.6	144556	87873	71891.5	86224.2	142732	7287.09	10211.6	3020.47	4087.84	3722.74	3836.02
M285T322_pos	Helenalin	Terpenoids	Sesquiterpenoids (C15)	Pseudoguaianolide	-	0.492305	2.15192	-1.65962	5228.17	5863.45	5429.55	5743.55	5101.34	5696.08	12861.2	14563.5	11990.1	14636.8	14625.8	15189.1	7286.33	8606.42	11284.6	10475.1	11639.3	10327.8	4071.16	2633.83	4234.28	2595.1	2683.06	2653.56
M321T216_pos	Hymenoxon	Terpenoids	Sesquiterpenoids (C15)	Pseudoguaianolide	-	1.28896	-1.19739	2.48635	4974.5	4970.41	5979.1	5167.06	5312.2	5212.58	10868.4	10911.4	9271.04	9774.72	13402.8	15889.5	3032.72	3896.44	4490.4	4578.96	5639.59	7057.32	25546.4	20470.8	25452.7	20613.6	29590.1	39123.3
M245T164_pos	Hymenoflorin	Terpenoids	Sesquiterpenoids (C15)	Pseudoguaianolide	-	-2.94478	0.339444	-3.28423	21933.7	11334.5	17683.6	16411	16694.8	16463.9	9834.62	13263	9211.34	7122.88	9518.4	9939.35	109679	72387.3	77369.4	65299.5	57104.3	71585.9	5620.18	7978.62	6564.61	10405.6	7534.44	8439.62
M533T268_pos	Microlenin	Terpenoids	Sesquiterpenoids (C15)	Pseudoguaianolide	-	0.965562	2.18813	-1.22257	19669.2	22194.5	18393.4	25278.9	17524.5	21381.7	33427.8	39322.3	29859.4	33779.3	25395	29661.5	24636.5	24693.3	25184.2	10236.6	6847.68	6436.98	10601.4	4107.96	3900.77	8563.3	5418.65	9417.87
M617T215_neg	Bryotoxin_A	Terpenoids	Steroids	Bufanolide	-	3.26261	2.64705	0.615559	3354.1	4885.75	3748.94	3668.52	3928.97	3934.21	7106.59	7735.09	7334.42	8672.41	8224.87	8628.49	707.648	786.039	726.497	1030.03	897.151	823.036	930.787	1561.79	1235.46	1273.42	1221.54	1392.41
M633T233_neg	Labriformin	Terpenoids	Steroids	Cardanolide	-	2.86654	2.86547	0.00106545	2359.49	2084.01	1983.54	2018.39	2313.82	2079.07	2926.1	3496.42	5132.6	4935.41	5567.91	5047.73	693.514	492.908	723.685	632.107	564.883	609.573	459.524	533.045	579.051	824.125	565.794	757.877
M570T403_pos	Bipindoside	Terpenoids	Steroids	Cardanolide	-	-3.9846	-0.86665	-3.11795	528.973	555.266	931.591	623.962	635.012	632.408	57.9154	170.598	170.736	246.552	241.509	124.718	1069.7	2631.14	3024.78	3136.94	2930.66	3227.28	381.673	414.631	255.729	294.896	260.062	238.364
M571T278_pos	Calotropin	Terpenoids	Steroids	Cardanolide	-	1.31107	2.16812	-0.857044	7376.82	6962.97	5122.66	5785.47	6937.28	6329.12	18866.8	20728.3	18908.2	21386.7	14686.7	20956.3	7477.71	9626.77	7726.04	7983.59	7408.05	6340.11	2952.24	3548.45	4399.76	5019.46	5412.99	4373.32
M561T45_pos	Labriformidin	Terpenoids	Steroids	Cardanolide	-	2.64001	1.66844	0.971572	5754.14	5754.14	5754.14	5754.14	5754.14	5754.14	14921.9	15858.2	20332.3	19348	16825.3	13264.2	2972.83	2463.69	3025.16	4065.9	1800.48	1802.83	5453.65	5432.65	5106.41	5837.27	5755.1	4047.21
M503T163_pos	Brassinolide	Terpenoids	Steroids	Ergostane	ko01060(Biosynthesis of plant secondary metabolites);ko00905(Brassinosteroid biosynthesis);ko00100(Steroid biosynthesis);ko01070(Biosynthesis of plant hormones);ko04075(Plant hormone signal transduction);ko01110(Biosynthesis of secondary metabolites);ko01100(Metabolic pathways);	-1.13648	-3.21409	2.07762	3068.47	3068.47	3068.47	3068.47	3068.47	3068.47	762.988	684.694	1099.08	865.653	1100.67	1715.48	8721.51	1055.65	761.587	514.267	948.72	1691.34	7687.83	16413.5	4707.92	9008.27	7918.22	12064.1
M267T305_neg	Castasterone	Terpenoids	Steroids	Ergostane	ko01060(Biosynthesis of plant secondary metabolites);ko01100(Metabolic pathways);ko01110(Biosynthesis of secondary metabolites);ko00905(Brassinosteroid biosynthesis);ko00100(Steroid biosynthesis);	-2.07235	-2.98116	0.908816	22490.3	17429.5	19715.6	15364.6	25455.9	17659.5	9632.72	3978.97	2513.94	2839.49	2443.25	2394.93	13042	11966	15377.4	19175.2	18533.2	22015.8	14799.4	37813.8	22282.5	41666.3	29491.3	41903.3
M469T239_neg	Withaferin_A	Terpenoids	Steroids	Others	-	-0.907751	-5.54517	4.63742	924.231	943.475	857.699	990.111	892.658	917.576	138.723	151.179	23.4748	99.4093	63.2748	125.122	148.915	169.822	197.109	232.433	197.754	181.858	3368.59	5626.11	3142.79	6008.28	4770.12	5155.89
M486T255_neg	Withanolide_D	Terpenoids	Steroids	Others	-	-1.17226	-3.70689	2.53464	7918.24	5490.97	6590.15	6918.63	6961.18	6480.58	1720.03	2067.89	157.397	1785.73	238.675	1579.06	2108.73	2912.29	3080.83	3236.77	3649.14	2024.46	18002	13600.2	17739.2	15069.8	15975.1	18187.9
M442T257_neg	Telocinobufagin	Terpenoids	Steroids_24-Carbon atoms	Bufanolide derivatives	-	-4.62492	-5.63775	1.01283	7543.51	6913.61	7524.13	7351.88	7549.59	7205.93	1008.23	180.51	212.897	259.298	128.647	321.227	4666.06	9382.99	5297.77	21850.3	5430.85	5454.16	18109.1	14979	19554.2	15528.4	16903	20021.1
M227T254_neg	Desmosterol	Terpenoids	Steroids_27-Carbon atoms	Cholestane derivatives	ko00100(Steroid biosynthesis);ko01100(Metabolic pathways);	0.0389268	-3.98323	4.02216	17043.2	17043.2	17043.2	17043.2	17043.2	17043.2	7002.38	8119.2	960.119	3910.18	3243.3	3673.92	6358.39	6613.84	3096.32	2829.88	3130.44	4163.88	101980	108738	61455.4	57342.7	48243.1	47812
M581T444_pos	Cucurbitacin_B	Terpenoids	Triterpenoids (C30)	Cucurbitanes	ko00996(Biosynthesis of various alkaloids);ko01110(Biosynthesis of secondary metabolites);	-1.50805	-5.61183	4.10377	2288.13	2429.57	2169.16	2382.89	2076.63	2419.57	194.073	140.048	105.065	167.926	129.354	122.663	255.979	347.355	457.601	486.553	431.754	464.345	8679.16	7191.39	7596.74	5512.43	6917.61	6115.94
M293T266_neg	Cucurbitacin_D	Terpenoids	Triterpenoids (C30)	Cucurbitanes	ko00996(Biosynthesis of various alkaloids);ko01110(Biosynthesis of secondary metabolites);	0.685316	4.10024	-3.41492	40804.3	40804.3	40804.3	40804.3	40804.3	40804.3	74552.9	88006.5	77676.6	68760.3	37392.6	74228.5	60191.4	52906.2	32665.4	31654.7	58010.5	26140.9	3148.51	4157.19	3081.43	4445.4	4492.36	5199.21
M607T157_pos	Bruceantinol	Terpenoids	Triterpenoids (C30)	Dammarenes	-	-0.264331	-2.90057	2.63624	48903	48707.5	47807.1	52384.2	47420	48967.9	32108.4	22811.9	32300.3	30710	21384.4	21685.8	29435	29587.9	36186.6	33158.8	34004.4	31002.2	233103	158035	225681	170308	189990	225110
M505T447_pos	Sergeolide	Terpenoids	Triterpenoids (C30)	Dammarenes	-	0.2851	-3.48139	3.76649	1503.05	1701.98	1237.7	1535.52	1487.63	1475.96	680.832	527.801	435.566	605.753	526.415	659.372	489.332	536.513	184.601	506.478	406.395	696.34	7912.8	4620.3	7435.67	5687.98	6474.96	6240.94
M417T42_pos	Glaucarubolone	Terpenoids	Triterpenoids (C30)	Dammarenes	-	-0.693295	-2.71935	2.02606	11966.6	17090.7	14056.3	13731.7	12620.4	14974.7	5977.38	5215.62	5951.66	5992.95	5724.39	6759.93	10816.1	7638.58	5998.13	6550.5	8357.04	18239.3	39110.4	35420.5	40688	37135.3	39703.3	42540.3
M283T56_neg	Glaucarubin	Terpenoids	Triterpenoids (C30)	Dammarenes	-	-0.148847	3.65151	-3.80035	31766.4	31766.4	31766.4	31766.4	31766.4	31766.4	50014.5	79060	48852.4	56020.2	55965	67390	96422.4	65969.1	61401.8	52388.3	28522.5	91430.6	6166.64	4751.57	4188.71	3809.83	4444.56	5071.67
M449T395_pos	Nigakihemiacetal_A	Terpenoids	Triterpenoids (C30)	Dammarenes	-	-1.71024	-2.99296	1.28272	1395.73	1337.15	1267.97	1703.28	856.333	1672	463.162	525.449	447.598	493.55	535.685	604.347	967.783	2198.26	1396.68	1929.37	1488.23	2064.5	3785.85	3948.44	4399.97	3588.86	3503.06	5212.54
M559T178_pos	Brusatol	Terpenoids	Triterpenoids (C30)	Dammarenes	-	2.35668	1.78875	0.567936	18742.1	18045.5	10770.6	15007.7	19433.5	14179.3	18158.2	16369	31560.9	10421.3	29525.2	19732.1	4785.27	4155.16	4254.07	4357.87	3675.1	3327.13	10080.8	3847.85	9574.43	3128.48	2789.26	6978.9
M457T34_neg	Soyasapogenol_B	Terpenoids	Triterpenoids (C30)	Dammarenes	-	-1.9082	-7.16836	5.26016	5058.89	5058.89	5058.89	5058.89	5058.89	5058.89	75.0977	321.851	109.151	289.276	316.922	450.195	1902.86	859.667	838.892	610.846	947.203	705.199	20050.4	55941.2	20182.3	54443.2	39253.7	34884.1
M705T268_pos	Bruceoside_A	Terpenoids	Triterpenoids (C30)	Dammarenes	-	0.527006	-2.6752	3.2022	10833.9	7181.54	9034.8	10176.8	8815.98	9001.31	7819.38	2904.46	5804.61	2739.88	4090.51	3820.07	2701.8	3988.5	2227.63	3790.94	3005.34	3147.78	22019.6	26832.1	26016.5	29663	33901.3	35166.1
M521T45_neg	Isobrucein_A	Terpenoids	Triterpenoids (C30)	Dammarenes	-	-2.02387	-4.08768	2.06381	15983.1	17598.7	19177.3	14752.6	19495	16494.6	5709.58	3338.31	7091.34	4678.98	5394.03	6335.49	20753.7	27920.6	26978.7	19294.8	18207	19207.8	89253.3	86788.2	85819.8	92671.5	101161	97699.2
M593T186_pos	Toonacilin	Terpenoids	Triterpenoids (C30)	Limonoids	-	-0.908898	-3.44711	2.53821	31820	33904.2	30802.4	39983.6	28132.4	34266.7	13240.8	24123.1	12363.1	8235.18	7682.48	12058.5	33964.3	25653	27159.4	18296.4	23872.3	16951	147559	172199	171151	115955	111473	129130
M587T385_neg	Camellidin_II	Terpenoids	Triterpenoids (C30)	Others	-	0.264565	-5.03891	5.30348	1207.62	1116.77	1299.26	1185.51	1283.3	1162.05	236.105	234.219	305.834	344.543	237.458	273.864	109.835	272.155	241.069	309.532	274.249	151.737	9835.17	8212.59	10090.9	7984.14	8607.62	8921.95
M471T41_2_neg	Gratiogenin	Terpenoids	Triterpenoids (C30)	Others	-	3.07214	-0.0182488	3.09039	3525.72	3072.08	3200.11	2796.68	3475.3	3192.63	4427.96	6529.6	6586.37	7721.96	5757.43	4840.18	985.327	1044.33	761.471	103.068	787.068	583.018	3389.24	10036.2	3048.04	9377.2	6097.71	4371.66
M487T44_neg	Cimigenol	Terpenoids	Triterpenoids (C30)	Protostanes	-	4.26489	-1.7224	5.98729	9000.66	7764.91	9967.27	7154.49	9454.4	8577.26	5630.97	12215.9	5560.69	11212.3	10064.6	7451.44	693.983	414.623	394.024	319.873	648.978	240.435	26460.6	35970.5	26118.8	31356.6	25484.9	26648.7
M491T32_pos	Alisol_A	Terpenoids	Triterpenoids (C30)	Protostanes	-	-0.928854	-4.03547	3.10661	1124.21	1039.53	1730.39	923.656	1622.19	1090.9	694.806	94.4273	178.531	94.845	317.378	313.743	2111.12	89.2163	123.438	48.4631	239.841	612.384	3123.97	5316.31	2588.46	6759.65	3709.41	6276.37
M455T37_neg	Ursolic_acid	Terpenoids	Triterpenoids (C30)	Ursanes	-	3.27185	0.424819	2.84703	3896.57	3896.57	3896.57	3896.57	3896.57	3896.57	6562.79	8891.41	7977.29	7616.48	6469.5	6343	663.628	612.113	1873.81	299.335	463.649	628.435	2532.14	6959.05	3291.79	9145.72	5315.4	5428.97
M306T498_neg	Glutathione	Vitamins and Cofactors	Cofactors	Coenzymes	ko00480(Glutathione metabolism);ko00270(Cysteine and methionine metabolism);ko02010(ABC transporters);ko01100(Metabolic pathways);	0.221334	-5.00799	5.22932	3554.62	3554.62	3554.62	3554.62	3554.62	3554.62	1175.16	1915.44	1299.84	1785.59	1719.08	1330.34	1201.95	1284.08	1253.07	499.553	2158.3	1516.38	36100.7	43477.6	41110.9	58345.5	62958.6	54860.1
M157T325_neg	Biotin;D-Biotin;Vitamin H;Coenzyme R	Vitamins and Cofactors	Cofactors	Coenzymes	ko01100(Metabolic pathways);ko02010(ABC transporters);ko00780(Biotin metabolism);	-1.65867	0.62141	-2.28008	11885.2	12116.6	11110.3	11854.2	12464.6	11364.7	8765.21	9473.21	8553.72	7123.74	8430.16	7498.73	23784.1	25316.2	28080.9	24966.9	26427.2	28797.3	3682.99	5378.11	5604.47	5821.72	6364.77	5548.8
M546T506_pos	3'-Phosphoadenylyl_sulfate	Vitamins and Cofactors	Cofactors	Coenzymes	ko00920(Sulfur metabolism);ko00230(Purine metabolism);ko01100(Metabolic pathways);	-2.14255	0.500325	-2.64288	1296.78	1250.09	1265.85	1019.99	1489.57	1181.38	380.788	602.178	428.905	691.97	521.674	717.251	1854.78	2201.73	2585.27	2767.15	2629.12	2721.69	203.22	434.464	446.672	370.839	368.145	539.82
M247T33_neg	Pyridoxal 5'-phosphate	Vitamins and Cofactors	Cofactors	Coenzymes	ko00750(Vitamin B6 metabolism);ko01100(Metabolic pathways);ko00730(Thiamine metabolism);	0.858137	3.69384	-2.8357	147528	125540	129137	133519	134503	134573	252029	251900	257440	232361	236307	242752	143734	140612	127639	133710	134526	132265	18306.1	20821.6	18005.9	16715.8	23356.6	16605.3
M200T507_neg	PQQ;Pyrrolo-quinoline quinone;Pyrroloquinoline-quinone;Pyrroloquinoline quinone;4,5-Dioxo-4,5-dihydro-1H-pyrrolo[2,3-f]quinoline-2,7,9-tricarboxylate;Methoxatin	Vitamins and Cofactors	Cofactors	Coenzymes	-	-2.64126	1.41225	-4.05351	17654.5	15614.2	16813.6	17003.6	16688.2	16710	6431.34	10209.3	7232.8	9321.65	8531.26	9120.73	58548.9	53688.6	45704.5	48343.7	56506.7	54430.6	2000.52	3850.94	2636.01	3015.81	3994.34	3606.92
M377T223_pos	Riboflavin;Lactoflavin;7,8-Dimethyl-10-ribitylisoalloxazine;Vitamin B2	Vitamins and Cofactors	Vitamins	Water-soluble vitamins	ko00740(Riboflavin metabolism);ko01110(Biosynthesis of secondary metabolites);ko01100(Metabolic pathways);	-2.86852	-1.59169	-1.27683	7288.46	12872.6	8470.43	9335.48	8908.68	9351.25	4464.9	3911.71	6472.44	4273.68	5608.83	5788.06	24513.3	35891	41889.4	33060.1	44516.4	43019.2	13588	14730.9	14368.9	16392.5	16670.8	16235.8
M168T39_pos	Pyridoxal	Vitamins and Cofactors	Vitamins	Water-soluble vitamins	ko00750(Vitamin B6 metabolism);ko01100(Metabolic pathways);	2.13116	1.50567	0.625486	20870.4	18242.6	20500.1	19890.1	19862.7	19845.1	91829.8	62038.9	77426.7	45876.6	64876.9	46327.7	17526.2	17427.5	12664.8	13668.6	13066	14303.4	22820.9	20395	33449.8	22120.4	21968.3	16018.6
M265T361_pos	Thiamine	Vitamins and Cofactors	Vitamins	Water-soluble vitamins	ko00730(Thiamine metabolism);ko01100(Metabolic pathways);ko01240(Biosynthesis of cofactors);ko02010(ABC transporters);ko04122(Sulfur relay system);ko04977(Vitamin digestion and absorption);	-2.50643	-1.58767	-0.918766	5899.8	5899.8	5899.8	5899.8	5899.8	5899.8	4465.97	4955.23	978.406	4476.12	3490.98	3096.03	13440.2	22572.5	20503.7	23809.2	23688.4	17940.3	14480.6	10617.6	10929.4	7877.09	9058.68	11545.7
