# Supplementary material for: Integrated Untargeted Metabolome, Full-Length Sequencing and Transcriptome Analyses Reveal the Mechanism of Flavonoid Biosynthesis in Blueberry (Vaccinium spp.) Fruit
Source: Int J Mol Sci. 2024 Apr 9;25(8):4137. doi: 10.3390/ijms25084137 (PMC11050320; doi:10.3390/ijms25084137)
Supplement: Supplementary file 1 [file ijms-25-04137-s001.zip › Table S2. KEGG enrichment analysis results of DEMs.xlsx]

## Sheet: Table S2
Table S2. KEGG enrichment analysis results of DEMs
Pathway_ID	KEGG_Level_1	KEGG_Level_2	Pathway_Name	IDs	S	TS	B	TB	Rich.Factor	P.value	Sig.Sign.P	Q.value	Sig.Sign.Q			All-56	Pathway_ID	KEGG_Level_1	KEGG_Level_2	Pathway_Name
ko00944	Metabolism	Biosynthesis of other secondary metabolites	Flavone and flavonol biosynthesis	C03515|C03515, C12638|C12638, C05903|C05903, C01514|C01514, C12249|C12249, C04293|C04293, C10098|C10098, C04443|C04443, C12633|C12633, C03951|C03951, C01750|C01750, C12626|C12626, C01714|C01714, C01265|C01265, C04024|C04024, C04199|C04199, C12630|C12630, C11620|C11620, C19796|C19796, C12635|C12635, C04608|C04608, C00389|C00389, C05625|C05625	23	106	27	1832	0.8519	4.38766e-26	****	2.23771e-24	****	Ex vs Sa		1	ko00942	Metabolism	Biosynthesis of other secondary metabolites	Anthocyanin biosynthesis		1	ko00940	Metabolism	Biosynthesis of other secondary metabolites	Phenylpropanoid biosynthesis	ko00940Phenylpropanoid biosynthesis
ko00941	Metabolism	Biosynthesis of other secondary metabolites	Flavonoid biosynthesis	C05903|C05903, C01514|C01514, C12127|C12127, C12128|C12128, C00389|C00389, C16410|C16410, C09099|C09099, C16408|C16408, C16422|C16422, C01604|C01604, C02947|C02947, C00852|C00852	12	106	27	1832	0.4444	6.38192e-09	****	1.39227e-07	****	Ex vs Sa		2	ko00944	Metabolism	Biosynthesis of other secondary metabolites	Flavone and flavonol biosynthesis		2	ko00941	Metabolism	Biosynthesis of other secondary metabolites	Flavonoid biosynthesis	ko00941Flavonoid biosynthesis
ko00942	Metabolism	Biosynthesis of other secondary metabolites	Anthocyanin biosynthesis	C08604|C08604, C16315|C16315, C16367|C16367, C12141|C12141, C12138|C12138, C16313|C16313, C16349|C16349, C20492|C20492, C12642|C12642	9	106	14	1832	0.6429	8.18982e-09	****	1.39227e-07	****	Ex vs Sa		3	ko00941	Metabolism	Biosynthesis of other secondary metabolites	Flavonoid biosynthesis		3	ko00942	Metabolism	Biosynthesis of other secondary metabolites	Anthocyanin biosynthesis	ko00942Anthocyanin biosynthesis
ko00940	Metabolism	Biosynthesis of other secondary metabolites	Phenylpropanoid biosynthesis	C02947|C02947, C00423|C00423, C00852|C00852, C00811|C00811, C02887|C02887, C01175|C01175, C01533|C01533, C05158|C05158, C00903|C00903, C05619|C05619	10	106	21	1832	0.4762	5.71746e-08	****	7.28977e-07	****	Ex vs Sa		4	ko00943	Metabolism	Biosynthesis of other secondary metabolites	Isoflavonoid biosynthesis		4	ko00943	Metabolism	Biosynthesis of other secondary metabolites	Isoflavonoid biosynthesis	ko00943Isoflavonoid biosynthesis
ko01110	Metabolism	Global and overview maps	Biosynthesis of secondary metabolites	C04272|C04272, C05903|C05903, C01514|C01514, C12127|C12127, C12249|C12249, C12128|C12128, C16187|C16187, C00389|C00389, C16227|C16227, C05625|C05625, C01604|C01604, C00130|C00130, C15794|C15794, C02947|C02947, C17252|C17252, C00423|C00423, C00852|C00852, C03677|C03677, C08526|C08526, C12448|C12448, C03190|C03190, C06071|C06071, C01852|C01852, C00811|C00811, C05158|C05158, C00903|C00903, C05619|C0…	37	106	273	1832	0.1355	9.49804e-08	****	9.688e-07	****	Ex vs Sa		5	ko00940	Metabolism	Biosynthesis of other secondary metabolites	Phenylpropanoid biosynthesis		5	ko01060	Metabolism	Chemical structure transformation maps	Biosynthesis of plant secondary metabolites	ko01060Biosynthesis of plant secondary metabolites
ko00943	Metabolism	Biosynthesis of other secondary metabolites	Isoflavonoid biosynthesis	C16187|C16187, C10520|C10520, C12135|C12135, C16197|C16197, C12625|C12625, C16231|C16231, C16192|C16192, C10509|C10509, C16227|C16227	9	106	18	1832	0.5	1.63453e-07	****	1.38935e-06	****	Ex vs Sa		6	ko02010	Environmental Information Processing	Membrane transport	ABC transporters		6	ko00062	Metabolism	Lipid metabolism	Fatty acid elongation	ko00062Fatty acid elongation
ko00902	Metabolism	Metabolism of terpenoids and polyketides	Monoterpenoid biosynthesis	C03190|C03190, C06071|C06071, C01852|C01852, C00341|C00341	4	106	9	1832	0.4444	0.00106562	**	0.00776383	**	Ex vs Sa		7	ko04075	Environmental Information Processing	Signal transduction	Plant hormone signal transduction		7	ko00071	Metabolism	Lipid metabolism	Fatty acid degradation	ko00071Fatty acid degradation
ko00130	Metabolism	Metabolism of cofactors and vitamins	Ubiquinone and other terpenoid-quinone biosynthesis	C00423|C00423, C00811|C00811, C04146|C04146, C00341|C00341	4	106	10	1832	0.4	0.00169737	**	0.0105638	*	Ex vs Sa		8	ko00970	Genetic Information Processing	Translation	Aminoacyl-tRNA biosynthesis		8	ko01052	Metabolism	Metabolism of terpenoids and polyketides	Type I polyketide structures	ko01052Type I polyketide structures
ko01057	Metabolism	Metabolism of terpenoids and polyketides	Biosynthesis of type II polyketide products	C20975|C20975, C12397|C12397, C06571|C06571, C12393|C12393, C12428|C12428, C18633|C18633	6	106	24	1832	0.25	0.0018642	**	0.0105638	*	Ex vs Sa		9	ko00250	Metabolism	Amino acid metabolism	Alanine, aspartate and glutamate metabolism		9	ko01057	Metabolism	Metabolism of terpenoids and polyketides	Biosynthesis of type II polyketide products	ko01057Biosynthesis of type II polyketide products
ko01100	Metabolism	Global and overview maps	Metabolic pathways	C04272|C04272, C05903|C05903, C01514|C01514, C00389|C00389, C05625|C05625, C00130|C00130, C15794|C15794, C02947|C02947, C00423|C00423, C01092|C01092, C05268|C05268, C03677|C03677, C12448|C12448, C05271|C05271, C03190|C03190, C00330|C00330, C00212|C00212, C06071|C06071, C01852|C01852, C00811|C00811, C00903|C00903, C05619|C05619, C00208|C00208, C00341|C00341, C00250|C00250, C00121|C00121, C20975|C2…	29	106	304	1832	0.0954	0.00272627	**	0.013904	*	Ex vs Sa		10	ko00290	Metabolism	Amino acid metabolism	Valine, leucine and isoleucine biosynthesis		10	ko01100	Metabolism	Global and overview maps	Metabolic pathways	ko01100Metabolic pathways
ko00901	Metabolism	Biosynthesis of other secondary metabolites	Indole alkaloid biosynthesis	C03677|C03677, C01852|C01852, C09028|C09028	3	106	10	1832	0.3	0.0167682	*	0.0671435	ns	Ex vs Sa		11	ko00280	Metabolism	Amino acid metabolism	Valine, leucine and isoleucine degradation		11	ko01110	Metabolism	Global and overview maps	Biosynthesis of secondary metabolites	ko01110Biosynthesis of secondary metabolites
ko00945	Metabolism	Biosynthesis of other secondary metabolites	Stilbenoid, diarylheptanoid and gingerol biosynthesis	C02947|C02947, C00852|C00852	2	106	4	1832	0.5	0.0184316	*	0.0671435	ns	Ex vs Sa		12	ko00996	Metabolism	Biosynthesis of other secondary metabolites	Biosynthesis of various alkaloids		12	ko01212	Metabolism	Global and overview maps	Fatty acid metabolism	ko01212Fatty acid metabolism
ko00062	Metabolism	Lipid metabolism	Fatty acid elongation	C05268|C05268, C05271|C05271	2	106	4	1832	0.5	0.0184316	*	0.0671435	ns	Ex vs Sa		13	ko00999	Metabolism	Biosynthesis of other secondary metabolites	Biosynthesis of various plant secondary metabolites
ko00253	Metabolism	Metabolism of terpenoids and polyketides	Tetracycline biosynthesis	C06571|C06571, C21439|C21439	2	106	4	1832	0.5	0.0184316	*	0.0671435	ns	Ex vs Sa		14	ko00966	Metabolism	Biosynthesis of other secondary metabolites	Glucosinolate biosynthesis
ko00780	Metabolism	Metabolism of cofactors and vitamins	Biotin metabolism	C01894|C01894, C01092|C01092	2	106	5	1832	0.4	0.029566	*	0.083478	ns	Ex vs Sa		15	ko00901	Metabolism	Biosynthesis of other secondary metabolites	Indole alkaloid biosynthesis
ko00071	Metabolism	Lipid metabolism	Fatty acid degradation	C05268|C05268, C05271|C05271	2	106	5	1832	0.4	0.029566	*	0.083478	ns	Ex vs Sa		16	ko00950	Metabolism	Biosynthesis of other secondary metabolites	Isoquinoline alkaloid biosynthesis
ko00900	Metabolism	Metabolism of terpenoids and polyketides	Terpenoid backbone biosynthesis	C04146|C04146, C00341|C00341	2	106	5	1832	0.4	0.029566	*	0.083478	ns	Ex vs Sa		17	ko00945	Metabolism	Biosynthesis of other secondary metabolites	Stilbenoid, diarylheptanoid and gingerol biosynthesis
ko01052	Metabolism	Metabolism of terpenoids and polyketides	Type I polyketide structures	C21278|C21278, C12102|C12102	2	106	5	1832	0.4	0.029566	*	0.083478	ns	Ex vs Sa		18	ko00960	Metabolism	Biosynthesis of other secondary metabolites	Tropane, piperidine and pyridine alkaloid biosynthesis
ko01060	Metabolism	Chemical structure transformation maps	Biosynthesis of plant secondary metabolites	C00130|C00130, C15794|C15794, C00423|C00423, C01852|C01852, C00903|C00903, C00341|C00341	6	106	42	1832	0.1429	0.0310996	*	0.083478	ns	Ex vs Sa		19	ko00052	Metabolism	Carbohydrate metabolism	Galactose metabolism
ko01212	Metabolism	Global and overview maps	Fatty acid metabolism	C05268|C05268, C05271|C05271	2	106	6	1832	0.3333	0.0426917	*	0.0996105	ns	Ex vs Sa		20	ko00630	Metabolism	Carbohydrate metabolism	Glyoxylate and dicarboxylate metabolism
ko00982	Metabolism	Xenobiotics biodegradation and metabolism	Drug metabolism - cytochrome P450	C16643|C16643, C07108|C07108	2	106	6	1832	0.3333	0.0426917	*	0.0996105	ns	Ex vs Sa		21	ko00620	Metabolism	Carbohydrate metabolism	Pyruvate metabolism
ko00980	Metabolism	Xenobiotics biodegradation and metabolism	Metabolism of xenobiotics by cytochrome P450	C14863|C14863, C19590|C19590, C19592|C19592	3	106	14	1832	0.2143	0.0429693	*	0.0996105	ns	Ex vs Sa		22	ko00500	Metabolism	Carbohydrate metabolism	Starch and sucrose metabolism
																23	ko01063	Metabolism	Chemical structure transformation maps	Biosynthesis of alkaloids derived from shikimate pathway
																24	ko01061	Metabolism	Chemical structure transformation maps	Biosynthesis of phenylpropanoids
Pathway_ID	KEGG_Level_1	KEGG_Level_2	Pathway_Name	IDs	S	TS	B	TB	Rich.Factor	P.value	Sig.Sign.P	Q.value	Sig.Sign.Q			25	ko01070	Metabolism	Chemical structure transformation maps	Biosynthesis of plant hormones
ko01110	Metabolism	Global and overview maps	Biosynthesis of secondary metabolites	C08492|C08492, C16308|C16308, C16850|C16850, C01107|C01107, C05903|C05903, C12127|C12127, C12136|C12136, C12249|C12249, C09727|C09727, C12128|C12128, C02906|C02906, C16187|C16187, C00389|C00389, C05909|C05909, C01617|C01617, C16227|C16227, C00509|C00509, C05625|C05625, C01604|C01604, C17232|C17232, C08417|C08417, C00483|C00483, C09769|C09769, C05837|C05837, C10632|C10632, C03406|C03406, C06427|C0…	115	256	273	1832	0.4212	1.91565e-37	****	2.27962e-35	****	Ex vs Se		26	ko01060	Metabolism	Chemical structure transformation maps	Biosynthesis of plant secondary metabolites
ko01100	Metabolism	Global and overview maps	Metabolic pathways	C18218|C18218, C12833|C12833, C01037|C01037, C05989|C05989, C02167|C02167, C00882|C00882, C15808|C15808, C01107|C01107, C01061|C01061, C05903|C05903, C00389|C00389, C01617|C01617, C00509|C00509, C05625|C05625, C10447|C10447, C03406|C03406, C06427|C06427, C00270|C00270, C00079|C00079, C00183|C00183, C00073|C00073, C00763|C00763, C04302|C04302, C06082|C06082, C00130|C00130, C00123|C00123, C08814|C0…	106	256	304	1832	0.3487	2.98597e-25	****	1.77665e-23	****	Ex vs Se		27	ko01210	Metabolism	Global and overview maps	2-Oxocarboxylic acid metabolism
ko01060	Metabolism	Chemical structure transformation maps	Biosynthesis of plant secondary metabolites	C09010|C09010, C00483|C00483, C06427|C06427, C00079|C00079, C00183|C00183, C00073|C00073, C06082|C06082, C00130|C00130, C00123|C00123, C08814|C08814, C15794|C15794, C07481|C07481, C00065|C00065, C08491|C08491, C00423|C00423, C00025|C00025, C00188|C00188, C00712|C00712, C00249|C00249, C00417|C00417, C01595|C01595, C00144|C00144, C00903|C00903, C00042|C00042, C00341|C00341, C06866|C06866	26	256	42	1832	0.619	3.93425e-13	****	1.56059e-11	****	Ex vs Se		28	ko01230	Metabolism	Global and overview maps	Biosynthesis of amino acids
ko00944	Metabolism	Biosynthesis of other secondary metabolites	Flavone and flavonol biosynthesis	C03515|C03515, C12638|C12638, C05903|C05903, C12249|C12249, C04293|C04293, C10098|C10098, C04444|C04444, C12633|C12633, C01750|C01750, C12626|C12626, C01714|C01714, C01265|C01265, C04024|C04024, C12630|C12630, C11620|C11620, C19796|C19796, C12629|C12629, C04608|C04608, C00389|C00389, C05625|C05625	20	256	27	1832	0.7407	1.46628e-12	****	4.36219e-11	****	Ex vs Se		29	ko01110	Metabolism	Global and overview maps	Biosynthesis of secondary metabolites
ko00941	Metabolism	Biosynthesis of other secondary metabolites	Flavonoid biosynthesis	C05903|C05903, C12127|C12127, C12136|C12136, C09727|C09727, C12128|C12128, C02906|C02906, C00389|C00389, C01378|C01378, C16416|C16416, C16410|C16410, C09099|C09099, C16408|C16408, C16422|C16422, C05909|C05909, C01617|C01617, C00509|C00509, C01604|C01604, C02947|C02947	18	256	27	1832	0.6667	3.45309e-10	****	8.21836e-09	****	Ex vs Se		30	ko01212	Metabolism	Global and overview maps	Fatty acid metabolism
ko00943	Metabolism	Biosynthesis of other secondary metabolites	Isoflavonoid biosynthesis	C16187|C16187, C10520|C10520, C12135|C12135, C09126|C09126, C15509|C15509, C16225|C16225, C16197|C16197, C12625|C12625, C16231|C16231, C16192|C16192, C10509|C10509, C16224|C16224, C16227|C16227, C00509|C00509	14	256	18	1832	0.7778	1.42618e-09	****	2.82859e-08	****	Ex vs Se		31	ko01100	Metabolism	Global and overview maps	Metabolic pathways
ko00940	Metabolism	Biosynthesis of other secondary metabolites	Phenylpropanoid biosynthesis	C00079|C00079, C02947|C02947, C00423|C00423, C05608|C05608, C02325|C02325, C00811|C00811, C10452|C10452, C02887|C02887, C01175|C01175, C01533|C01533, C05158|C05158, C01197|C01197, C05610|C05610, C00903|C00903, C01481|C01481	15	256	21	1832	0.7143	2.58013e-09	****	4.38623e-08	****	Ex vs Se		32	ko00592	Metabolism	Lipid metabolism	alpha-Linolenic acid metabolism
ko02010	Environmental Information Processing	Membrane transport	ABC transporters	C01835|C01835, C01630|C01630, C05402|C05402, C00079|C00079, C00183|C00183, C00123|C00123, C00065|C00065, C00025|C00025, C00188|C00188, C00243|C00243, C00051|C00051, C00333|C00333, C00185|C00185, C00208|C00208, C00089|C00089, C01083|C01083, C00121|C00121, C00492|C00492, C01936|C01936	19	256	38	1832	0.5	9.05783e-08	****	1.34735e-06	****	Ex vs Se		33	ko01040	Metabolism	Lipid metabolism	Biosynthesis of unsaturated fatty acids
ko00592	Metabolism	Lipid metabolism	alpha-Linolenic acid metabolism	C16345|C16345, C08492|C08492, C16308|C16308, C06427|C06427, C16311|C16311, C08491|C08491, C00157|C00157	7	256	7	1832	1	9.68846e-07	****	1.28103e-05	****	Ex vs Se		34	ko00073	Metabolism	Lipid metabolism	Cutin, suberine and wax biosynthesis
ko01212	Metabolism	Global and overview maps	Fatty acid metabolism	C16387|C16387, C00249|C00249, C05266|C05266, C00510|C00510, C05268|C05268, C05271|C05271	6	256	6	1832	1	7.07645e-06	****	8.42097e-05	****	Ex vs Se		35	ko00061	Metabolism	Lipid metabolism	Fatty acid biosynthesis
ko00950	Metabolism	Biosynthesis of other secondary metabolites	Isoquinoline alkaloid biosynthesis	C00483|C00483, C06517|C06517, C07307|C07307, C17591|C17591, C08526|C08526, C02106|C02106, C05179|C05179, C05174|C05174, C06165|C06165	9	256	14	1832	0.6429	1.88047e-05	****	0.000203433	***	Ex vs Se		36	ko00071	Metabolism	Lipid metabolism	Fatty acid degradation
ko01057	Metabolism	Metabolism of terpenoids and polyketides	Biosynthesis of type II polyketide products	C20975|C20975, C12408|C12408, C12386|C12386, C18296|C18296, C18640|C18640, C18634|C18634, C06571|C06571, C12393|C12393, C12428|C12428, C12398|C12398, C12384|C12384, C12412|C12412	12	256	24	1832	0.5	2.45988e-05	****	0.000243939	***	Ex vs Se		37	ko00062	Metabolism	Lipid metabolism	Fatty acid elongation
ko01040	Metabolism	Lipid metabolism	Biosynthesis of unsaturated fatty acids	C06427|C06427, C16526|C16526, C00712|C00712, C00249|C00249, C00510|C00510, C01595|C01595, C06426|C06426	7	256	9	1832	0.7778	2.70539e-05	****	0.000247647	***	Ex vs Se		38	ko00591	Metabolism	Lipid metabolism	Linoleic acid metabolism
ko01070	Metabolism	Chemical structure transformation maps	Biosynthesis of plant hormones	C06427|C06427, C00079|C00079, C00073|C00073, C06082|C06082, C00130|C00130, C08814|C08814, C08491|C08491, C00423|C00423, C00417|C00417, C00042|C00042, C00341|C00341	11	256	21	1832	0.5238	3.12022e-05	****	0.000265219	***	Ex vs Se		39	ko00100	Metabolism	Lipid metabolism	Steroid biosynthesis
ko01210	Metabolism	Global and overview maps	2-Oxocarboxylic acid metabolism	C17232|C17232, C08417|C08417, C16588|C16588, C05837|C05837, C00079|C00079, C00183|C00183, C00073|C00073, C00123|C00123, C17252|C17252, C00025|C00025, C08418|C08418, C00417|C00417, C02504|C02504, C00233|C00233	14	256	33	1832	0.4242	5.24077e-05	****	0.000415768	***	Ex vs Se		40	ko00780	Metabolism	Metabolism of cofactors and vitamins	Biotin metabolism
ko00966	Metabolism	Biosynthesis of other secondary metabolites	Glucosinolate biosynthesis	C17232|C17232, C08417|C08417, C05837|C05837, C00079|C00079, C00183|C00183, C00073|C00073, C00123|C00123, C17252|C17252, C08418|C08418, C00233|C00233	10	256	19	1832	0.5263	6.94768e-05	****	0.000516734	***	Ex vs Se		41	ko00770	Metabolism	Metabolism of cofactors and vitamins	Pantothenate and CoA biosynthesis
ko00970	Genetic Information Processing	Translation	Aminoacyl-tRNA biosynthesis	C00079|C00079, C00183|C00183, C00073|C00073, C00123|C00123, C00065|C00065, C00025|C00025, C00188|C00188	7	256	10	1832	0.7	7.94502e-05	****	0.000556151	***	Ex vs Se		42	ko00130	Metabolism	Metabolism of cofactors and vitamins	Ubiquinone and other terpenoid-quinone biosynthesis
ko00960	Metabolism	Biosynthesis of other secondary metabolites	Tropane, piperidine and pyridine alkaloid biosynthesis	C00079|C00079, C12448|C12448, C10858|C10858, C03325|C03325, C01479|C01479	5	256	6	1832	0.8333	0.00027367	***	0.00180926	**	Ex vs Se		43	ko00460	Metabolism	Metabolism of other amino acids	Cyanoamino acid metabolism
ko00100	Metabolism	Lipid metabolism	Steroid biosynthesis	C15808|C15808, C08814|C08814, C15794|C15794, C01802|C01802	4	256	4	1832	1	0.000373642	***	0.00222317	**	Ex vs Se		44	ko00522	Metabolism	Metabolism of terpenoids and polyketides	Biosynthesis of 12-, 14- and 16-membered macrolides
ko00062	Metabolism	Lipid metabolism	Fatty acid elongation	C00249|C00249, C05266|C05266, C05268|C05268, C05271|C05271	4	256	4	1832	1	0.000373642	***	0.00222317	**	Ex vs Se		45	ko01051	Metabolism	Metabolism of terpenoids and polyketides	Biosynthesis of ansamycins
ko00902	Metabolism	Metabolism of terpenoids and polyketides	Monoterpenoid biosynthesis	C09769|C09769, C11673|C11673, C01512|C01512, C03190|C03190, C06071|C06071, C00341|C00341	6	256	9	1832	0.6667	0.000409128	***	0.00231839	**	Ex vs Se		46	ko01057	Metabolism	Metabolism of terpenoids and polyketides	Biosynthesis of type II polyketide products
ko00522	Metabolism	Metabolism of terpenoids and polyketides	Biosynthesis of 12-, 14- and 16-membered macrolides	C15681|C15681, C06630|C06630, C11969|C11969, C11987|C11987, C11977|C11977	5	256	7	1832	0.7143	0.000848539	***	0.00458982	**	Ex vs Se		47	ko00905	Metabolism	Metabolism of terpenoids and polyketides	Brassinosteroid biosynthesis
ko01230	Metabolism	Global and overview maps	Biosynthesis of amino acids	C03406|C03406, C00079|C00079, C00183|C00183, C00073|C00073, C04302|C04302, C00123|C00123, C00065|C00065, C00025|C00025, C00188|C00188, C02504|C02504, C00233|C00233	11	256	29	1832	0.3793	0.00107803	**	0.00557762	**	Ex vs Se		48	ko00904	Metabolism	Metabolism of terpenoids and polyketides	Diterpenoid biosynthesis
ko00942	Metabolism	Biosynthesis of other secondary metabolites	Anthocyanin biosynthesis	C08604|C08604, C16307|C16307, C16367|C16367, C12141|C12141, C12138|C12138, C12642|C12642, C08629|C08629	7	256	14	1832	0.5	0.00137244	**	0.0065933	**	Ex vs Se		49	ko00902	Metabolism	Metabolism of terpenoids and polyketides	Monoterpenoid biosynthesis
ko00073	Metabolism	Lipid metabolism	Cutin, suberine and wax biosynthesis	C18218|C18218, C00712|C00712, C00249|C00249, C19418|C19418	4	256	5	1832	0.8	0.00166218	**	0.0065933	**	Ex vs Se		50	ko00900	Metabolism	Metabolism of terpenoids and polyketides	Terpenoid backbone biosynthesis
ko00900	Metabolism	Metabolism of terpenoids and polyketides	Terpenoid backbone biosynthesis	C01107|C01107, C04146|C04146, C00341|C00341, C01230|C01230	4	256	5	1832	0.8	0.00166218	**	0.0065933	**	Ex vs Se		51	ko00253	Metabolism	Metabolism of terpenoids and polyketides	Tetracycline biosynthesis
ko00460	Metabolism	Metabolism of other amino acids	Cyanoamino acid metabolism	C00079|C00079, C00183|C00183, C05143|C05143, C00065|C00065	4	256	5	1832	0.8	0.00166218	**	0.0065933	**	Ex vs Se		52	ko01052	Metabolism	Metabolism of terpenoids and polyketides	Type I polyketide structures
ko00071	Metabolism	Lipid metabolism	Fatty acid degradation	C00249|C00249, C05266|C05266, C05268|C05268, C05271|C05271	4	256	5	1832	0.8	0.00166218	**	0.0065933	**	Ex vs Se		53	ko00230	Metabolism	Nucleotide metabolism	Purine metabolism
ko00591	Metabolism	Lipid metabolism	Linoleic acid metabolism	C14837|C14837, C01595|C01595, C06426|C06426, C00157|C00157	4	256	5	1832	0.8	0.00166218	**	0.0065933	**	Ex vs Se		54	ko00240	Metabolism	Nucleotide metabolism	Pyrimidine metabolism
ko01052	Metabolism	Metabolism of terpenoids and polyketides	Type I polyketide structures	C08073|C08073, C21278|C21278, C21277|C21277, C12045|C12045	4	256	5	1832	0.8	0.00166218	**	0.0065933	**	Ex vs Se		55	ko00982	Metabolism	Xenobiotics biodegradation and metabolism	Drug metabolism - cytochrome P450
ko00290	Metabolism	Amino acid metabolism	Valine, leucine and isoleucine biosynthesis	C00183|C00183, C00123|C00123, C00188|C00188, C02504|C02504, C00233|C00233	5	256	8	1832	0.625	0.00200542	**	0.00745764	**	Ex vs Se		56	ko00980	Metabolism	Xenobiotics biodegradation and metabolism	Metabolism of xenobiotics by cytochrome P450
ko00630	Metabolism	Carbohydrate metabolism	Glyoxylate and dicarboxylate metabolism	C00065|C00065, C00025|C00025, C00888|C00888, C00417|C00417, C00042|C00042	5	256	8	1832	0.625	0.00200542	**	0.00745764	**	Ex vs Se
ko00500	Metabolism	Carbohydrate metabolism	Starch and sucrose metabolism	C00252|C00252, C00185|C00185, C00208|C00208, C00089|C00089, C01083|C01083, C01936|C01936	6	256	12	1832	0.5	0.00310663	**	0.0112027	*	Ex vs Se
ko01051	Metabolism	Metabolism of terpenoids and polyketides	Biosynthesis of ansamycins	C20140|C20140, C12246|C12246, C12045|C12045, C20134|C20134	4	256	6	1832	0.6667	0.00443919	**	0.0155372	*	Ex vs Se
ko00130	Metabolism	Metabolism of cofactors and vitamins	Ubiquinone and other terpenoid-quinone biosynthesis	C00423|C00423, C00811|C00811, C04146|C04146, C00341|C00341, C01230|C01230	5	256	10	1832	0.5	0.00709791	**	0.0241329	*	Ex vs Se
ko00996	Metabolism	Biosynthesis of other secondary metabolites	Biosynthesis of various alkaloids	C10632|C10632, C06866|C06866, C08794|C08794, C08796|C08796	4	256	7	1832	0.5714	0.00922672	**	0.0295476	*	Ex vs Se
ko00770	Metabolism	Metabolism of cofactors and vitamins	Pantothenate and CoA biosynthesis	C00882|C00882, C00183|C00183, C00106|C00106	3	256	4	1832	0.75	0.00968368	**	0.0295476	*	Ex vs Se
ko04075	Environmental Information Processing	Signal transduction	Plant hormone signal transduction	C06082|C06082, C08814|C08814, C08491|C08491	3	256	4	1832	0.75	0.00968368	**	0.0295476	*	Ex vs Se
ko00253	Metabolism	Metabolism of terpenoids and polyketides	Tetracycline biosynthesis	C18296|C18296, C06571|C06571, C21439|C21439	3	256	4	1832	0.75	0.00968368	**	0.0295476	*	Ex vs Se
ko00999	Metabolism	Biosynthesis of other secondary metabolites	Biosynthesis of various plant secondary metabolites	C08307|C08307, C00758|C00758, C02274|C02274, C01424|C01424, C08308|C08308	5	256	11	1832	0.4545	0.0115487	*	0.0343574	*	Ex vs Se
ko00905	Metabolism	Metabolism of terpenoids and polyketides	Brassinosteroid biosynthesis	C08814|C08814, C15794|C15794	2	256	2	1832	1	0.0194611	*	0.0551396	ns	Ex vs Se
ko00061	Metabolism	Lipid metabolism	Fatty acid biosynthesis	C00712|C00712, C00249|C00249	2	256	2	1832	1	0.0194611	*	0.0551396	ns	Ex vs Se
ko00230	Metabolism	Nucleotide metabolism	Purine metabolism	C00130|C00130, C01762|C01762, C00330|C00330, C00212|C00212, C00387|C00387, C00144|C00144	6	256	17	1832	0.3529	0.0225988	*	0.0625409	ns	Ex vs Se
ko00250	Metabolism	Amino acid metabolism	Alanine, aspartate and glutamate metabolism	C00402|C00402, C03406|C03406, C00025|C00025, C00042|C00042	4	256	9	1832	0.4444	0.0264058	*	0.0714158	ns	Ex vs Se
ko00980	Metabolism	Xenobiotics biodegradation and metabolism	Metabolism of xenobiotics by cytochrome P450	C14856|C14856, C14863|C14863, C19590|C19590, C14861|C14861, C19592|C19592	5	256	14	1832	0.3571	0.0350855	*	0.0927815	ns	Ex vs Se
ko00620	Metabolism	Carbohydrate metabolism	Pyruvate metabolism	C02488|C02488, C00042|C00042, C02504|C02504	3	256	6	1832	0.5	0.0389927	*	0.0946965	ns	Ex vs Se
ko00280	Metabolism	Amino acid metabolism	Valine, leucine and isoleucine degradation	C00183|C00183, C00123|C00123, C00233|C00233	3	256	6	1832	0.5	0.0389927	*	0.0946965	ns	Ex vs Se
ko00904	Metabolism	Metabolism of terpenoids and polyketides	Diterpenoid biosynthesis	C11867|C11867, C03579|C03579, C11700|C11700	3	256	6	1832	0.5	0.0389927	*	0.0946965	ns	Ex vs Se
ko00982	Metabolism	Xenobiotics biodegradation and metabolism	Drug metabolism - cytochrome P450	C16643|C16643, C07108|C07108, C16545|C16545	3	256	6	1832	0.5	0.0389927	*	0.0946965	ns	Ex vs Se
ko00240	Metabolism	Nucleotide metabolism	Pyrimidine metabolism	C00106|C00106, C00475|C00475, C00299|C00299, C00380|C00380, C00364|C00364	5	256	15	1832	0.3333	0.0468015	*	0.111388	ns	Ex vs Se
Pathway_ID	KEGG_Level_1	KEGG_Level_2	Pathway_Name	IDs	S	TS	B	TB	Rich.Factor	P.value	Sig.Sign.P	Q.value	Sig.Sign.Q
ko01110	Metabolism	Global and overview maps	Biosynthesis of secondary metabolites	C08492|C08492, C16308|C16308, C04405|C04405, C12136|C12136, C09727|C09727, C12128|C12128, C00509|C00509, C00483|C00483, C06427|C06427, C00079|C00079, C00183|C00183, C00073|C00073, C08557|C08557, C00123|C00123, C10886|C10886, C16311|C16311, C02074|C02074, C06517|C06517, C08491|C08491, C11673|C11673, C09183|C09183, C11700|C11700, C08418|C08418, C17591|C17591, C02106|C02106, C05179|C05179, C05608|C0…	55	131	273	1832	0.2015	3.71782e-15	****	3.30886e-13	****	Se vs Sa
ko01100	Metabolism	Global and overview maps	Metabolic pathways	C18218|C18218, C02167|C02167, C00882|C00882, C15808|C15808, C01061|C01061, C04405|C04405, C00509|C00509, C10447|C10447, C06427|C06427, C00079|C00079, C00183|C00183, C00073|C00073, C00763|C00763, C00123|C00123, C08491|C08491, C00249|C00249, C11700|C11700, C05266|C05266, C00243|C00243, C00051|C00051, C02106|C02106, C05179|C05179, C00794|C00794, C01595|C01595, C05608|C05608, C02325|C02325, C12448|C1…	52	131	304	1832	0.1711	3.76554e-11	****	1.67566e-09	****	Se vs Sa
ko02010	Environmental Information Processing	Membrane transport	ABC transporters	C01835|C01835, C05402|C05402, C00079|C00079, C00183|C00183, C00123|C00123, C00243|C00243, C00051|C00051, C00794|C00794, C00185|C00185, C00208|C00208, C00089|C00089, C01083|C01083, C00492|C00492, C01936|C01936	14	131	38	1832	0.3684	1.01855e-07	****	3.02171e-06	****	Se vs Sa
ko01040	Metabolism	Lipid metabolism	Biosynthesis of unsaturated fatty acids	C06427|C06427, C16526|C16526, C00712|C00712, C00249|C00249, C00510|C00510, C01595|C01595, C06426|C06426	7	131	9	1832	0.7778	2.61627e-07	****	5.82121e-06	****	Se vs Sa
ko01060	Metabolism	Chemical structure transformation maps	Biosynthesis of plant secondary metabolites	C09010|C09010, C00483|C00483, C06427|C06427, C00079|C00079, C00183|C00183, C00073|C00073, C00123|C00123, C08491|C08491, C00712|C00712, C00249|C00249, C01595|C01595, C00144|C00144, C06866|C06866, C00078|C00078	14	131	42	1832	0.3333	4.34049e-07	****	7.72607e-06	****	Se vs Sa
ko00592	Metabolism	Lipid metabolism	alpha-Linolenic acid metabolism	C16345|C16345, C08492|C08492, C16308|C16308, C06427|C06427, C16311|C16311, C08491|C08491	6	131	7	1832	0.8571	7.90737e-07	****	1.17293e-05	****	Se vs Sa
ko00999	Metabolism	Biosynthesis of other secondary metabolites	Biosynthesis of various plant secondary metabolites	C08307|C08307, C00758|C00758, C02274|C02274, C00078|C00078, C01424|C01424, C08308|C08308	6	131	11	1832	0.5455	4.09978e-05	****	0.000521257	***	Se vs Sa
ko00500	Metabolism	Carbohydrate metabolism	Starch and sucrose metabolism	C00252|C00252, C00185|C00185, C00208|C00208, C00089|C00089, C01083|C01083, C01936|C01936	6	131	12	1832	0.5	7.7205e-05	****	0.000858906	***	Se vs Sa
ko00073	Metabolism	Lipid metabolism	Cutin, suberine and wax biosynthesis	C18218|C18218, C00712|C00712, C00249|C00249, C19418|C19418	4	131	5	1832	0.8	0.000118269	***	0.00105259	**	Se vs Sa
ko01052	Metabolism	Metabolism of terpenoids and polyketides	Type I polyketide structures	C08073|C08073, C21278|C21278, C21277|C21277, C12045|C12045	4	131	5	1832	0.8	0.000118269	***	0.00105259	**	Se vs Sa
ko00966	Metabolism	Biosynthesis of other secondary metabolites	Glucosinolate biosynthesis	C00079|C00079, C00183|C00183, C00073|C00073, C00123|C00123, C08418|C08418, C00233|C00233, C00078|C00078	7	131	19	1832	0.3684	0.00019885	***	0.00160888	**	Se vs Sa
ko00970	Genetic Information Processing	Translation	Aminoacyl-tRNA biosynthesis	C00079|C00079, C00183|C00183, C00073|C00073, C00123|C00123, C00078|C00078	5	131	10	1832	0.5	0.000326424	***	0.00198842	**	Se vs Sa
ko01212	Metabolism	Global and overview maps	Fatty acid metabolism	C16387|C16387, C00249|C00249, C05266|C05266, C00510|C00510	4	131	6	1832	0.6667	0.000335126	***	0.00198842	**	Se vs Sa
ko00280	Metabolism	Amino acid metabolism	Valine, leucine and isoleucine degradation	C04405|C04405, C00183|C00183, C00123|C00123, C00233|C00233	4	131	6	1832	0.6667	0.000335126	***	0.00198842	**	Se vs Sa
ko00960	Metabolism	Biosynthesis of other secondary metabolites	Tropane, piperidine and pyridine alkaloid biosynthesis	C00079|C00079, C12448|C12448, C03325|C03325, C01479|C01479	4	131	6	1832	0.6667	0.000335126	***	0.00198842	**	Se vs Sa
ko00941	Metabolism	Biosynthesis of other secondary metabolites	Flavonoid biosynthesis	C12136|C12136, C09727|C09727, C12128|C12128, C01378|C01378, C16416|C16416, C09099|C09099, C16422|C16422, C00509|C00509	8	131	27	1832	0.2963	0.000384419	***	0.00212725	**	Se vs Sa
ko00940	Metabolism	Biosynthesis of other secondary metabolites	Phenylpropanoid biosynthesis	C00079|C00079, C05608|C05608, C02325|C02325, C00933|C00933, C10452|C10452, C01533|C01533, C01481|C01481	7	131	21	1832	0.3333	0.000406329	***	0.00212725	**	Se vs Sa
ko00996	Metabolism	Biosynthesis of other secondary metabolites	Biosynthesis of various alkaloids	C06866|C06866, C08794|C08794, C08796|C08796, C00078|C00078	4	131	7	1832	0.5714	0.000738676	***	0.00365234	**	Se vs Sa
ko00052	Metabolism	Carbohydrate metabolism	Galactose metabolism	C01613|C01613, C05402|C05402, C00243|C00243, C00794|C00794, C00089|C00089, C00492|C00492	6	131	18	1832	0.3333	0.00108222	**	0.00481589	**	Se vs Sa
ko00943	Metabolism	Biosynthesis of other secondary metabolites	Isoflavonoid biosynthesis	C09126|C09126, C15509|C15509, C16197|C16197, C12625|C12625, C10509|C10509, C00509|C00509	6	131	18	1832	0.3333	0.00108222	**	0.00481589	**	Se vs Sa
ko00290	Metabolism	Amino acid metabolism	Valine, leucine and isoleucine biosynthesis	C00183|C00183, C00123|C00123, C02504|C02504, C00233|C00233	4	131	8	1832	0.5	0.00139574	**	0.00564641	**	Se vs Sa
ko01061	Metabolism	Chemical structure transformation maps	Biosynthesis of phenylpropanoids	C01481|C01481, C00758|C00758, C00078|C00078, C01424|C01424	4	131	8	1832	0.5	0.00139574	**	0.00564641	**	Se vs Sa
ko01210	Metabolism	Global and overview maps	2-Oxocarboxylic acid metabolism	C00079|C00079, C00183|C00183, C00073|C00073, C00123|C00123, C08418|C08418, C02504|C02504, C00233|C00233, C00078|C00078	8	131	33	1832	0.2424	0.00166486	**	0.00644228	**	Se vs Sa
ko00942	Metabolism	Biosynthesis of other secondary metabolites	Anthocyanin biosynthesis	C16307|C16307, C16312|C16312, C12141|C12141, C16354|C16354, C08629|C08629	5	131	14	1832	0.3571	0.00205094	**	0.00730136	**	Se vs Sa
ko00950	Metabolism	Biosynthesis of other secondary metabolites	Isoquinoline alkaloid biosynthesis	C00483|C00483, C06517|C06517, C17591|C17591, C02106|C02106, C05179|C05179	5	131	14	1832	0.3571	0.00205094	**	0.00730136	**	Se vs Sa
ko01230	Metabolism	Global and overview maps	Biosynthesis of amino acids	C00079|C00079, C00183|C00183, C00073|C00073, C00123|C00123, C02504|C02504, C00233|C00233, C00078|C00078	7	131	29	1832	0.2414	0.00335902	**	0.0114982	*	Se vs Sa
ko00901	Metabolism	Biosynthesis of other secondary metabolites	Indole alkaloid biosynthesis	C02074|C02074, C09028|C09028, C06536|C06536, C00078|C00078	4	131	10	1832	0.4	0.0037388	**	0.0123242	*	Se vs Sa
ko00061	Metabolism	Lipid metabolism	Fatty acid biosynthesis	C00712|C00712, C00249|C00249	2	131	2	1832	1	0.00507693	**	0.0161374	*	Se vs Sa
ko01057	Metabolism	Metabolism of terpenoids and polyketides	Biosynthesis of type II polyketide products	C12408|C12408, C18640|C18640, C12397|C12397, C06624|C06624, C12398|C12398, C12384|C12384	6	131	24	1832	0.25	0.00548724	**	0.0168402	*	Se vs Sa
ko00904	Metabolism	Metabolism of terpenoids and polyketides	Diterpenoid biosynthesis	C03579|C03579, C09183|C09183, C11700|C11700	3	131	6	1832	0.5	0.00609201	**	0.01749	*	Se vs Sa
ko01051	Metabolism	Metabolism of terpenoids and polyketides	Biosynthesis of ansamycins	C20140|C20140, C12246|C12246, C12045|C12045	3	131	6	1832	0.5	0.00609201	**	0.01749	*	Se vs Sa
ko00522	Metabolism	Metabolism of terpenoids and polyketides	Biosynthesis of 12-, 14- and 16-membered macrolides	C15681|C15681, C06630|C06630, C11969|C11969	3	131	7	1832	0.4286	0.010107	*	0.0281101	*	Se vs Sa
ko01070	Metabolism	Chemical structure transformation maps	Biosynthesis of plant hormones	C06427|C06427, C00079|C00079, C00073|C00073, C08491|C08491, C00078|C00078	5	131	21	1832	0.2381	0.013876	*	0.0374231	*	Se vs Sa
ko00770	Metabolism	Metabolism of cofactors and vitamins	Pantothenate and CoA biosynthesis	C00882|C00882, C00183|C00183	2	131	4	1832	0.5	0.0276736	*	0.0684154	ns	Se vs Sa
ko00100	Metabolism	Lipid metabolism	Steroid biosynthesis	C15808|C15808, C01802|C01802	2	131	4	1832	0.5	0.0276736	*	0.0684154	ns	Se vs Sa
ko00062	Metabolism	Lipid metabolism	Fatty acid elongation	C00249|C00249, C05266|C05266	2	131	4	1832	0.5	0.0276736	*	0.0684154	ns	Se vs Sa
ko01063	Metabolism	Chemical structure transformation maps	Biosynthesis of alkaloids derived from shikimate pathway	C06866|C06866, C06536|C06536, C00078|C00078	3	131	11	1832	0.2727	0.0385629	*	0.0927594	ns	Se vs Sa
ko00460	Metabolism	Metabolism of other amino acids	Cyanoamino acid metabolism	C00079|C00079, C00183|C00183	2	131	5	1832	0.4	0.0439804	*	0.0978563	ns	Se vs Sa
ko00071	Metabolism	Lipid metabolism	Fatty acid degradation	C00249|C00249, C05266|C05266	2	131	5	1832	0.4	0.0439804	*	0.0978563	ns	Se vs Sa
ko00591	Metabolism	Lipid metabolism	Linoleic acid metabolism	C01595|C01595, C06426|C06426	2	131	5	1832	0.4	0.0439804	*	0.0978563	ns	Se vs Sa
