# Supplementary material for: Integrated Untargeted Metabolome, Full-Length Sequencing and Transcriptome Analyses Reveal the Mechanism of Flavonoid Biosynthesis in Blueberry (Vaccinium spp.) Fruit
Source: Int J Mol Sci. 2024 Apr 9;25(8):4137. doi: 10.3390/ijms25084137 (PMC11050320; doi:10.3390/ijms25084137)
Supplement: Supplementary file 1 [file ijms-25-04137-s001.zip › Table S3. All the clean reads matched the genome of blueberry.xlsx]

## Sheet: Table S3
Table S3. All the clean reads matched the genome of blueberry.
Sample	Total reads	Total_mapping rate
Ex_1	88795546	0.8873
Ex_2	79710214	0.8877
Ex_3	76625864	0.8841
Sa_1	118327700	0.8908
Sa_2	116329800	0.8789
Sa_3	79741146	0.8808
Se_1	81986722	0.8863
Se_2	113182736	0.8787
Se_3	80086812	0.8706
