# Supplementary material for: Integrated Untargeted Metabolome, Full-Length Sequencing and Transcriptome Analyses Reveal the Mechanism of Flavonoid Biosynthesis in Blueberry (Vaccinium spp.) Fruit
Source: Int J Mol Sci. 2024 Apr 9;25(8):4137. doi: 10.3390/ijms25084137 (PMC11050320; doi:10.3390/ijms25084137)
Supplement: Supplementary file 1 [file ijms-25-04137-s001.zip › Table S4. GO enrichment analysis results of DEGs.xlsx]

## Sheet: Table S4
Table S4. GO enrichment analysis results of DEGs.
Rank	GO_ID	class	GO_Name	IDs	S	TS	B	TB	Rich.Factor	P.value	Sig.Sign.P	Q.value	Sig.Sign.Q			Rank	GO_ID	class	GO_Name	IDs	S	TS	B	TB	Rich.Factor	P.value	Sig.Sign.P	Q.value	Sig.Sign.Q			Rank	GO_ID	class	GO_Name	IDs	S	TS	B	TB	Rich.Factor	P.value	Sig.Sign.P	Q.value	Sig.Sign.Q			merge result:GO_ID	class
1	GO:0016020	CC	membrane	Novel0179, Novel0663, Novel0854, Novel0864, Novel2376, Novel3199, Novel3206, Novel4144, Novel5248, Vc103a1.29, Vc10a1.24, Vc10a159.23, Vc10a173.26, Vc10a192.35, Vc10a22.41, Vc10a259.20, Vc10a278.16, Vc10a280.34, Vc10a342.30, Vc10a60.41, Vc10a66.28, Vc10p144.11, Vc10p255.13, Vc10p338.6, Vc10p363.8, Vc10p40.9, Vc10s168.38, Vc10s265.34, Vc10s322.15, Vc1102p0.1, Vc112a0.32, Vc112a3.47, Vc112a3.57, Vc…	947	1861	13331	52010	0.071	1.08614e-124	****	1.61509e-121	****	Ex vs Sa		1	GO:0016020	CC	membrane	Novel0179, Novel0283, Novel0349, Novel0605, Novel0663, Novel0854, Novel1077, Novel1110, Novel1273, Novel1504, Novel1569, Novel1860, Novel1883, Novel1889, Novel2131, Novel2262, Novel2797, Novel2971, Novel2977, Novel3021, Novel3162, Novel3199, Novel3206, Novel3465, Novel3525, Novel4039, Novel4144, Novel4248, Novel4493, Novel4561, Novel4714, Novel4719, Novel4751, Novel4753, Novel4981, Novel4995, Nov…	3449	7813	13331	52010	0.2587	0	****	0	****	Ex vs Se		1	GO:0016020	CC	membrane	Novel0194, Novel0206, Novel0283, Novel0445, Novel0471, Novel0605, Novel0752, Novel0864, Novel0922, Novel1077, Novel1094, Novel1110, Novel1226, Novel1273, Novel1504, Novel1569, Novel1860, Novel1883, Novel1889, Novel2071, Novel2131, Novel2262, Novel2376, Novel2381, Novel2399, Novel2797, Novel2971, Novel2977, Novel3021, Novel3033, Novel3162, Novel3465, Novel3486, Novel3525, Novel4039, Novel4248, Nov…	3896	9109	13331	52010	0.2923	0	****	0	****	Se vs Sa		GO:0016020	CC
2	GO:0016705	MF	oxidoreductase activity, acting on paired donors, with incorporation or reduction of molecular oxygen	Novel2248, Vc10a192.35, Vc10s168.38, Vc112a0.32, Vc11s369.50, Vc12a323.22, Vc12a395.19, Vc12a80.32, Vc13a238.27, Vc13p8.4, Vc14p329.0, Vc14p365.2, Vc14s19.34, Vc17a387.47, Vc19s281.28, Vc1a241.25, Vc20a101.22, Vc20a269.18, Vc20s242.26, Vc21a13.24, Vc21p326.1, Vc21s269.49, Vc22a131.24, Vc22a304.29, Vc23a330.25, Vc23a68.32, Vc23a68.33, Vc24a58.38, Vc24s153.19, Vc25s25.33, Vc26a205.20, Vc26s130.36, …	93	1861	401	52010	0.2319	8.08468e-48	****	6.01096e-45	****	Ex vs Sa		2	GO:0005576	CC	extracellular region	Novel0044, Novel3465, Novel4981, Novel5484, Vc10a66.28, Vc10a93.19, Vc10s265.32, Vc10s265.34, Vc1127a0.6, Vc119s3.55, Vc11a190.18, Vc11a198.29, Vc11a314.24, Vc11a333.39, Vc11p90.11, Vc11s340.47, Vc11s386.65, Vc11s398.32, Vc1215a0.4, Vc12a298.31, Vc12a392.28, Vc12p382.8, Vc12s48.26, Vc13a112.29, Vc13a167.14, Vc13a282.27, Vc13a314.21, Vc149a1.17, Vc14a323.40, Vc14a69.29, Vc14s355.43, Vc15a159.14, V…	253	7813	472	52010	0.536	2.11297e-85	****	3.67234e-82	****	Ex vs Se		2	GO:0071944	CC	cell periphery	Vc1043s0.10, Vc1088p0.4, Vc10a278.16, Vc10a82.22, Vc10p196.15, Vc10s265.34, Vc10s48.32, Vc11a297.22, Vc11a307.39, Vc11a322.28, Vc11a324.36, Vc11a375.17, Vc11a382.39, Vc11p235.2, Vc11s371.38, Vc11s39.28, Vc120a3.48, Vc1233s0.10, Vc12a290.24, Vc12a295.21, Vc12a350.33, Vc12a376.30, Vc12p13.19, Vc12p375.8, Vc12s121.37, Vc1334s0.10, Vc1353a0.6, Vc138a0.21, Vc13a33.40, Vc13a337.31, Vc13a7.23, Vc13a90.2…	343	9109	761	52010	0.4507	2.0021e-70	****	3.90609e-67	****	Se vs Sa		GO:0016705	MF
3	GO:0020037	MF	heme binding	Vc10a192.35, Vc10s168.38, Vc10s232.19, Vc112a0.32, Vc115a1.24, Vc11a356.35, Vc12a323.22, Vc12a395.19, Vc12a80.32, Vc131s3.42, Vc13a238.27, Vc13p8.4, Vc13s100.34, Vc1410a0.7, Vc14p365.2, Vc14s19.34, Vc14s322.43, Vc15a348.38, Vc16s40.47, Vc17a387.47, Vc19s281.28, Vc1a241.25, Vc1s45.29, Vc20a101.22, Vc20s242.26, Vc20s273.27, Vc21a112.20, Vc21a112.21, Vc21a13.24, Vc21p326.1, Vc22a304.29, Vc23a330.25,…	101	1861	502	52010	0.2012	7.91874e-46	****	3.92505e-43	****	Ex vs Sa		3	GO:0006952	BP	defense response	Novel0967, Novel1860, Novel2262, Novel3832, Novel4130, Novel4490, Vc1032p0.1, Vc1047p0.1, Vc10a163.27, Vc10a380.40, Vc10a380.41, Vc10a381.28, Vc10a381.30, Vc10a381.33, Vc10p265.7, Vc10p62.13, Vc10s381.47, Vc10s382.22, Vc111p1.11, Vc1177a0.5, Vc11a399.36, Vc11s279.31, Vc12a10.30, Vc12a234.13, Vc12a37.34, Vc12a374.24, Vc12a78.41, Vc12p13.19, Vc12p382.8, Vc12s353.27, Vc1335p0.1, Vc1338a0.7, Vc13a122…	322	7813	741	52010	0.4345	4.87676e-78	****	5.65054e-75	****	Ex vs Se		3	GO:0005576	CC	extracellular region	Novel3465, Novel4981, Novel5484, Vc10a66.27, Vc10a93.19, Vc10s265.32, Vc10s265.34, Vc1127a0.6, Vc119s3.55, Vc11a190.18, Vc11a198.29, Vc11a314.24, Vc11p90.11, Vc11s340.47, Vc11s398.32, Vc1215a0.4, Vc12a24.20, Vc12a392.28, Vc12p382.8, Vc12s22.28, Vc12s52.45, Vc12s53.42, Vc13a167.14, Vc13a314.21, Vc13a314.25, Vc13p141.11, Vc14a382.26, Vc14a69.29, Vc14s355.43, Vc15a159.14, Vc15a296.30, Vc15a315.28, V…	249	9109	472	52010	0.5275	3.79232e-68	****	4.93254e-65	****	Se vs Sa		GO:0020037	MF
4	GO:0005576	CC	extracellular region	Novel0044, Vc10a66.28, Vc10s265.34, Vc11a333.39, Vc12a24.20, Vc12a298.31, Vc12p382.8, Vc12s48.26, Vc13a112.29, Vc13a282.27, Vc13a314.25, Vc13p141.11, Vc149a1.17, Vc14a382.26, Vc15a315.27, Vc15a323.36, Vc15p242.0, Vc16a136.20, Vc16p382.10, Vc18a14.32, Vc19a272.32, Vc19a351.33, Vc19p288.0, Vc19p50.5, Vc1a374.32, Vc1s45.29, Vc20a353.15, Vc21a112.20, Vc21a112.21, Vc21a249.36, Vc21s287.27, Vc22a89.30,…	96	1861	472	52010	0.2034	4.92207e-44	****	1.82978e-41	****	Ex vs Sa		4	GO:0071944	CC	cell periphery	Vc1032p0.1, Vc103a1.29, Vc1043s0.10, Vc10a342.30, Vc10a82.22, Vc10p196.15, Vc10p363.8, Vc10s265.34, Vc11a297.22, Vc11a307.39, Vc11a322.28, Vc11a324.36, Vc11a375.17, Vc11s344.28, Vc11s371.38, Vc120a3.48, Vc1233s0.10, Vc12a290.24, Vc12a350.33, Vc12a376.30, Vc12p13.19, Vc12s121.37, Vc1334s0.10, Vc133a2.18, Vc1353a0.6, Vc138a0.21, Vc13a337.31, Vc13a7.23, Vc13s37.54, Vc13s57.53, Vc145a0.34, Vc146a2.57…	327	7813	761	52010	0.4297	9.72396e-78	****	8.45012e-75	****	Ex vs Se		4	GO:0006355	BP	regulation of DNA-templated transcription	Novel0042, Novel0763, Novel0967, Novel1845, Novel1972, Novel2231, Novel2262, Novel2432, Novel2876, Novel2908, Novel2932, Novel2977, Novel3832, Novel3913, Novel4130, Novel4490, Novel4883, Novel5317, Vc102a4.41, Vc1047p0.1, Vc105a4.47, Vc10a175.17, Vc10a199.19, Vc10a224.19, Vc10a231.21, Vc10a34.29, Vc10a378.29, Vc10a390.33, Vc10a60.47, Vc10p234.4, Vc10p26.5, Vc10p299.1, Vc10p331.23, Vc11a110.26, Vc…	598	9109	1846	52010	0.3239	2.38953e-56	****	2.33099e-53	****	Se vs Sa		GO:0005576	CC
5	GO:0071944	CC	cell periphery	Vc103a1.29, Vc10a278.16, Vc10a342.30, Vc10p363.8, Vc10s265.34, Vc11p235.2, Vc12p375.8, Vc133a2.18, Vc13a33.40, Vc14a133.25, Vc151a2.48, Vc151p1.1, Vc151s0.37, Vc15a333.29, Vc16a1.31, Vc16s375.45, Vc17a151.17, Vc17a153.17, Vc17a253.28, Vc17a253.29, Vc17a56.37, Vc17s216.36, Vc17s350.31, Vc17s56.40, Vc18a20.19, Vc18a292.22, Vc19a116.37, Vc19a43.41, Vc19a45.34, Vc1a323.25, Vc1a403.29, Vc1a459.29, Vc1…	112	1861	761	52010	0.1472	4.36656e-37	****	1.29862e-34	****	Ex vs Sa		5	GO:0006355	BP	regulation of DNA-templated transcription	Novel0042, Novel0763, Novel0967, Novel2231, Novel2262, Novel2908, Novel2977, Novel3832, Novel3913, Novel4130, Novel4490, Novel4883, Novel5317, Vc102a4.41, Vc1047p0.1, Vc105a4.47, Vc1069a0.8, Vc10a117.28, Vc10a175.17, Vc10a199.19, Vc10a224.19, Vc10a231.21, Vc10a319.37, Vc10a60.47, Vc10a68.39, Vc10p234.4, Vc10p299.1, Vc10p331.23, Vc11a110.26, Vc11a207.26, Vc11a301.20, Vc11a302.17, Vc11a352.34, Vc11…	545	7813	1846	52010	0.2952	7.78295e-59	****	5.4107e-56	****	Ex vs Se		5	GO:0003700	MF	DNA-binding transcription factor activity	Novel0763, Novel0967, Novel1845, Novel2231, Novel2262, Novel2432, Novel2876, Novel2908, Novel2932, Novel3832, Novel3913, Novel4130, Novel4490, Novel4493, Novel4883, Novel5317, Vc102a1.33, Vc1047p0.1, Vc105a4.47, Vc10a175.17, Vc10a231.21, Vc10a378.29, Vc10a390.33, Vc10p234.4, Vc10p26.5, Vc10p299.1, Vc113s1.45, Vc11a352.34, Vc11p28.4, Vc11p335.2, Vc11p335.5, Vc11s150.34, Vc11s282.27, Vc11s334.37, V…	396	9109	1055	52010	0.3754	5.53553e-55	****	4.31992e-52	****	Se vs Sa		GO:0071944	CC
6	GO:0005506	MF	iron ion binding	Vc10a192.35, Vc10s168.38, Vc112a0.32, Vc12a323.22, Vc12a395.19, Vc12a80.32, Vc13a238.27, Vc13p8.4, Vc14p365.2, Vc14s19.34, Vc17a376.26, Vc17a387.47, Vc19s281.28, Vc1a241.25, Vc20a101.22, Vc20a11.26, Vc20s242.26, Vc21a13.24, Vc21a378.44, Vc21p326.1, Vc22a304.29, Vc22a60.28, Vc22p59.6, Vc23a330.25, Vc23a68.32, Vc23a68.33, Vc24a58.38, Vc24s153.19, Vc25s25.33, Vc26a205.20, Vc26s130.36, Vc27a337.39, V…	83	1861	435	52010	0.1908	4.62301e-36	****	1.14574e-33	****	Ex vs Sa		6	GO:0055085	BP	transmembrane transport	Vc102a4.44, Vc10a260.15, Vc10a371.19, Vc10p144.11, Vc10p291.7, Vc10p40.9, Vc10s13.29, Vc10s385.46, Vc10s398.35, Vc114a3.61, Vc115p2.20, Vc118p3.13, Vc11a111.24, Vc11a361.31, Vc11a54.15, Vc11s371.38, Vc1269a0.3, Vc12a290.24, Vc12a51.41, Vc12s128.53, Vc1334s0.10, Vc13a192.29, Vc13a252.24, Vc13s92.35, Vc146a2.57, Vc14a192.36, Vc14a386.31, Vc14a388.29, Vc14p326.33, Vc14s198.21, Vc14s392.31, Vc151a0.2…	289	7813	813	52010	0.3555	3.23494e-48	****	1.87411e-45	****	Ex vs Se		6	GO:0005524	MF	ATP binding	Novel0855, Novel2556, Novel2630, Novel5165, Novel5248, Vc106a4.43, Vc1081a0.8, Vc10a114.32, Vc10a114.36, Vc10a139.26, Vc10a198.17, Vc10a209.25, Vc10a221.32, Vc10a258.25, Vc10a258.27, Vc10a334.32, Vc10a34.29, Vc10a365.35, Vc10a371.19, Vc10p119.3, Vc10p178.7, Vc10p322.0, Vc10p372.3, Vc10s107.31, Vc10s317.27, Vc10s399.42, Vc10s48.32, Vc10s5.33, Vc10s82.28, Vc114s3.68, Vc1150p0.6, Vc11a232.27, Vc11a2…	1100	9109	4105	52010	0.268	3.53001e-54	****	2.29568e-51	****	Se vs Sa		GO:0005506	MF
7	GO:0004497	MF	monooxygenase activity	Vc10a192.35, Vc10s168.38, Vc112a0.32, Vc112a3.47, Vc12a323.22, Vc12a395.19, Vc12a80.32, Vc13a238.27, Vc13p8.4, Vc14p365.2, Vc14s19.34, Vc17a387.47, Vc19s281.28, Vc1a241.25, Vc20a101.22, Vc20s242.26, Vc21a13.24, Vc21p326.1, Vc22a304.29, Vc23a330.25, Vc23a68.32, Vc23a68.33, Vc24a58.38, Vc24s153.19, Vc25s25.33, Vc26a205.20, Vc26s130.36, Vc27a337.39, Vc28p114.1, Vc29a198.27, Vc29a7.44, Vc29s127.41, V…	73	1861	336	52010	0.2173	9.24576e-36	****	1.96406e-33	****	Ex vs Sa		7	GO:0003700	MF	DNA-binding transcription factor activity	Novel0763, Novel0967, Novel2231, Novel2262, Novel2908, Novel3832, Novel3913, Novel4130, Novel4490, Novel4493, Novel4883, Novel5317, Vc102a1.33, Vc1047p0.1, Vc105a4.47, Vc10a175.17, Vc10a231.21, Vc10a95.34, Vc10p234.4, Vc10p299.1, Vc11a207.26, Vc11a352.34, Vc11p335.2, Vc11p335.5, Vc11s150.34, Vc11s282.27, Vc12a60.42, Vc12p136.0, Vc12s169.39, Vc12s296.36, Vc12s8.35, Vc13a122.18, Vc13a154.14, Vc13a1…	343	7813	1055	52010	0.3251	5.21956e-47	****	2.59188e-44	****	Ex vs Se		7	GO:0005737	CC	cytoplasm	Novel0194, Novel1225, Novel1226, Novel1883, Novel2381, Novel2668, Novel4396, Novel5013, Novel5028, Vc106a4.45, Vc10a121.22, Vc10a198.17, Vc10a198.18, Vc10a199.19, Vc10a2.36, Vc10a209.25, Vc10a245.21, Vc10a316.34, Vc10a317.18, Vc10a334.32, Vc10a34.29, Vc10a342.29, Vc10a345.26, Vc10a381.33, Vc10a80.27, Vc10s107.31, Vc10s243.33, Vc10s265.36, Vc10s317.27, Vc10s325.25, Vc10s378.40, Vc10s4.41, Vc10s63.…	1038	9109	3959	52010	0.2622	2.40275e-46	****	1.33936e-43	****	Se vs Sa		GO:0004497	MF
8	GO:0009922	MF	fatty acid elongase activity	Novel3199, Vc10s322.15, Vc11a53.18, Vc13p97.14, Vc14a212.26, Vc14a275.23, Vc15a60.24, Vc19a155.20, Vc19a57.30, Vc19s130.30, Vc1a90.20, Vc20a127.40, Vc20a60.39, Vc24a329.18, Vc25a245.28, Vc25a318.31, Vc25p250.8, Vc269p0.23, Vc28a219.27, Vc2a248.22, Vc2a302.39, Vc2a322.25, Vc3a133.27, Vc3a82.27, Vc48a62.48, Vc5a108.22, Vc64a6.32, Vc794a0.7, Vc8p335.15	29	1861	45	52010	0.6444	3.42069e-31	****	6.35821e-29	****	Ex vs Sa		8	GO:0020037	MF	heme binding	Novel0283, Novel0349, Vc10a192.35, Vc10a348.25, Vc10s232.19, Vc112a0.32, Vc11a240.22, Vc11a345.31, Vc11a356.35, Vc11p309.17, Vc11s241.32, Vc11s61.32, Vc12a323.22, Vc12a78.41, Vc12a80.32, Vc12p109.7, Vc12p83.4, Vc13a136.41, Vc13a136.42, Vc13a138.30, Vc13a159.12, Vc13a238.27, Vc13p136.9, Vc13s302.30, Vc13s53.55, Vc1452a0.4, Vc14a192.34, Vc14a323.40, Vc14a358.35, Vc14p365.2, Vc14s19.34, Vc14s282.27,…	208	7813	502	52010	0.4143	9.51889e-47	****	4.13596e-44	****	Ex vs Se		8	GO:0055085	BP	transmembrane transport	Novel0206, Novel2071, Novel3033, Vc102a4.44, Vc10a260.15, Vc10a371.19, Vc10p291.7, Vc10s13.29, Vc10s385.46, Vc114a3.61, Vc115p2.20, Vc118p3.13, Vc11a111.24, Vc11a361.31, Vc11p91.5, Vc11s371.38, Vc11s39.22, Vc11s39.28, Vc1269a0.3, Vc12a165.25, Vc12a290.24, Vc12s128.53, Vc12s268.38, Vc1334s0.10, Vc13a192.29, Vc13a252.24, Vc13a318.39, Vc13s73.43, Vc13s86.26, Vc13s92.35, Vc13s98.35, Vc146a2.57, Vc14a…	310	9109	813	52010	0.3813	7.85838e-45	****	3.83292e-42	****	Se vs Sa		GO:0009922	MF
9	GO:0045548	MF	phenylalanine ammonia-lyase activity	Vc10a222.29, Vc10p225.6, Vc11p299.22, Vc15a283.32, Vc19a331.32, Vc1a185.22, Vc1a186.19, Vc1a187.25, Vc21a13.24, Vc24a101.15, Vc24a58.38, Vc26a180.26, Vc29a173.18, Vc29a7.44, Vc302a0.32, Vc33a169.12, Vc33p307.8, Vc5a235.33, Vc5s236.31, Vc5s236.34, Vc8a235.20, Vc8a235.22, Vc8a236.15	23	1861	26	52010	0.8846	1.11447e-30	****	1.84135e-28	****	Ex vs Sa		9	GO:0005524	MF	ATP binding	Novel0854, Novel1055, Novel2556, Novel2630, Novel5165, Vc1032p0.1, Vc103a1.29, Vc106a4.43, Vc1081a0.8, Vc10a139.26, Vc10a163.27, Vc10a209.25, Vc10a258.25, Vc10a258.27, Vc10a334.32, Vc10a364.26, Vc10a371.19, Vc10p119.3, Vc10p144.11, Vc10p322.0, Vc10p363.8, Vc10s317.27, Vc10s399.42, Vc114s3.68, Vc1150p0.6, Vc11a145.15, Vc11a232.27, Vc11a249.25, Vc11a269.29, Vc11a285.25, Vc11a315.22, Vc11a339.40, Vc…	947	7813	4105	52010	0.2307	4.36357e-46	****	1.68531e-43	****	Ex vs Se		9	GO:0046872	MF	metal ion binding	Novel0763, Novel1845, Novel2169, Novel3418, Novel4100, Novel4402, Novel5261, Novel5376, Novel5505, Vc102a1.29, Vc102s4.56, Vc1047s0.8, Vc106a1.22, Vc106a4.43, Vc10a105.22, Vc10a110.29, Vc10a121.22, Vc10a136.27, Vc10a137.20, Vc10a174.12, Vc10a226.29, Vc10a24.27, Vc10a269.16, Vc10a34.29, Vc10a342.29, Vc10a356.15, Vc10a371.21, Vc10a66.26, Vc10a7.35, Vc10a82.22, Vc10a90.16, Vc10a92.18, Vc10p43.7, Vc1…	814	9109	3005	52010	0.2709	1.7618e-41	****	7.63838e-39	****	Se vs Sa		GO:0045548	MF
10	GO:0038023	MF	signaling receptor activity	Vc10a364.26, Vc10a380.40, Vc10a381.28, Vc10a381.30, Vc10a381.33, Vc10s381.47, Vc12a107.49, Vc14a133.25, Vc14p171.3, Vc1a22.33, Vc1a22.34, Vc1a22.44, Vc1a323.25, Vc21a306.25, Vc23a305.41, Vc25s232.25, Vc28a23.21, Vc2a176.15, Vc2a318.34, Vc33a286.31, Vc35a213.33, Vc36a135.32, Vc36a230.31, Vc36a235.33, Vc38a176.34, Vc3a426.20, Vc4a307.29, Vc5a19.35, Vc5a19.38, Vc5a20.29, Vc60s7.24, Vc6a192.19, Vc74a…	43	1861	129	52010	0.3333	6.83295e-30	****	1.01606e-27	****	Ex vs Sa		10	GO:0005886	CC	plasma membrane	Novel2630, Novel3042, Vc102a4.44, Vc10a258.25, Vc10a258.27, Vc10a332.45, Vc10a364.26, Vc10s148.19, Vc10s95.41, Vc112p1.10, Vc1150p0.6, Vc118p3.13, Vc11a269.29, Vc11a285.25, Vc11a326.29, Vc11a331.42, Vc11a339.40, Vc11p32.6, Vc11s93.30, Vc120a0.27, Vc1249a0.3, Vc1296a0.6, Vc12a100.16, Vc12a107.49, Vc12a234.13, Vc12a254.22, Vc12a302.25, Vc12a356.30, Vc12a374.24, Vc12a42.33, Vc12a44.31, Vc12a5.23, Vc…	359	7813	1164	52010	0.3084	2.20187e-43	****	7.65371e-41	****	Ex vs Se		10	GO:0003677	MF	DNA binding	Novel0763, Novel0967, Novel1845, Novel2262, Novel2432, Novel2480, Novel2876, Novel3156, Novel3418, Novel3465, Novel3832, Novel3855, Novel4130, Novel4402, Novel4490, Novel5261, Novel5327, Novel5376, Novel5505, Vc102a4.41, Vc1047p0.1, Vc106a4.43, Vc10a174.12, Vc10a199.19, Vc10a224.19, Vc10a231.21, Vc10a34.29, Vc10a378.29, Vc10a60.47, Vc10p20.8, Vc10p26.5, Vc10p94.1, Vc10s181.38, Vc10s317.26, Vc10s3…	614	9109	2105	52010	0.2917	2.41581e-41	****	9.42651e-39	****	Se vs Sa		GO:0038023	MF
11	GO:0055085	BP	transmembrane transport	Vc10p144.11, Vc10p40.9, Vc11a54.15, Vc11p91.5, Vc12a51.41, Vc13s73.43, Vc14a192.36, Vc14s46.29, Vc15a61.19, Vc15p19.6, Vc15p269.4, Vc15p95.6, Vc16s375.45, Vc17a253.28, Vc17a253.29, Vc18a20.19, Vc19a116.37, Vc19a156.18, Vc19p318.4, Vc1a11.39, Vc1a403.29, Vc1a459.29, Vc20a115.29, Vc20a207.33, Vc20p339.3, Vc20s213.22, Vc21a188.12, Vc21a258.35, Vc225a1.30, Vc228a0.66, Vc22a179.20, Vc22a291.37, Vc22p2…	104	1861	813	52010	0.1279	2.74436e-29	****	3.70987e-27	****	Ex vs Sa		11	GO:0005975	BP	carbohydrate metabolic process	Novel4981, Novel5484, Vc10a136.27, Vc10a137.20, Vc10s13.30, Vc114a2.35, Vc11a296.20, Vc11a305.23, Vc11a394.26, Vc11p335.2, Vc11p335.5, Vc11p90.11, Vc11s279.31, Vc11s398.32, Vc126s3.69, Vc12a10.30, Vc12a298.31, Vc12a37.34, Vc12a382.41, Vc12a92.40, Vc12p382.8, Vc12s353.27, Vc13a355.23, Vc13a98.30, Vc13p40.9, Vc148s1.45, Vc14a352.33, Vc14a377.25, Vc14a385.20, Vc14a76.19, Vc14a79.31, Vc155s2.63, Vc15…	226	7813	607	52010	0.3723	1.30648e-41	****	4.12849e-39	****	Ex vs Se		11	GO:0005886	CC	plasma membrane	Novel2630, Novel3042, Vc1006a0.7, Vc102a4.44, Vc10a258.25, Vc10a258.27, Vc10a365.35, Vc10p190.2, Vc10s148.19, Vc10s227.21, Vc10s4.41, Vc10s46.39, Vc10s5.38, Vc10s95.41, Vc112p1.10, Vc1150p0.6, Vc115a1.24, Vc118p3.13, Vc11a222.34, Vc11p310.2, Vc120a0.27, Vc1249a0.3, Vc1296a0.6, Vc12a100.16, Vc12a165.25, Vc12a234.13, Vc12a254.22, Vc12a302.25, Vc12a356.30, Vc12a357.34, Vc12a37.30, Vc12a374.24, Vc12a…	391	9109	1164	52010	0.3359	6.00748e-41	****	2.13102e-38	****	Se vs Sa		GO:0055085	BP
12	GO:0009813	BP	flavonoid biosynthetic process	Novel3202, Novel4416, Vc11p356.13, Vc13a238.27, Vc13a41.36, Vc13a46.32, Vc14a212.26, Vc14s354.49, Vc15a348.41, Vc16p23.9, Vc18a373.31, Vc19p4.6, Vc1a316.27, Vc1a318.41, Vc20a5.31, Vc20a68.33, Vc20a68.35, Vc21a108.29, Vc24a46.35, Vc25a245.28, Vc26a107.28, Vc28a290.34, Vc29a108.20, Vc2a248.22, Vc30a297.38, Vc30a303.29, Vc30s175.29, Vc32a318.21, Vc32a323.35, Vc32p137.5, Vc32p295.2, Vc33a231.26, Vc36…	48	1861	191	52010	0.2513	5.57688e-27	****	6.91069e-25	****	Ex vs Sa		12	GO:0016705	MF	oxidoreductase activity, acting on paired donors, with incorporation or reduction of molecular oxygen	Novel0283, Novel0349, Novel2248, Vc10a192.35, Vc10a348.25, Vc10p81.9, Vc112a0.32, Vc11a240.22, Vc11a345.31, Vc11s241.32, Vc11s61.32, Vc12a323.22, Vc12a78.41, Vc12a80.32, Vc12p83.4, Vc13a136.41, Vc13a136.42, Vc13a138.30, Vc13a159.12, Vc13a238.27, Vc13p136.9, Vc1452a0.4, Vc14a192.34, Vc14p329.0, Vc14p365.2, Vc14s19.34, Vc14s282.27, Vc15a235.26, Vc15a239.39, Vc15s334.29, Vc15s360.57, Vc17a387.47, Vc…	171	7813	401	52010	0.4264	1.25931e-40	****	3.64779e-38	****	Ex vs Se		12	GO:0006952	BP	defense response	Novel0967, Novel1860, Novel2262, Novel2876, Novel3832, Novel4130, Novel4490, Vc1047p0.1, Vc10a378.29, Vc10a381.33, Vc10a80.27, Vc10p26.5, Vc10p265.7, Vc10p62.13, Vc10s381.47, Vc10s382.22, Vc10s82.28, Vc111p1.11, Vc11a399.36, Vc11s279.31, Vc12a10.30, Vc12a234.13, Vc12a37.30, Vc12a374.24, Vc12a78.41, Vc12p13.19, Vc12p209.5, Vc12p375.8, Vc12p382.8, Vc12s22.28, Vc12s353.27, Vc12s52.45, Vc1338a0.7, Vc…	279	9109	741	52010	0.3765	2.70278e-39	****	8.78853e-37	****	Se vs Sa		GO:0009813	BP
13	GO:0005975	BP	carbohydrate metabolic process	Vc11s279.31, Vc11s334.37, Vc126s3.69, Vc12a10.30, Vc12a12.37, Vc12a298.31, Vc12a37.34, Vc12a92.40, Vc12p12.12, Vc12p382.8, Vc1326a0.7, Vc13a314.25, Vc14a255.30, Vc14a377.25, Vc155s2.63, Vc15a315.27, Vc15s324.35, Vc16a26.46, Vc16p36.1, Vc17a50.20, Vc17s341.52, Vc18a30.23, Vc18a367.20, Vc18a376.35, Vc19a26.20, Vc19a311.28, Vc20a352.37, Vc20s376.32, Vc21a31.19, Vc21a51.39, Vc21a8.22, Vc22p271.9, Vc2…	84	1861	607	52010	0.1384	3.30128e-26	****	3.77615e-24	****	Ex vs Sa		13	GO:0005506	MF	iron ion binding	Novel0283, Novel0349, Vc10a11.27, Vc10a192.35, Vc10a348.25, Vc112a0.32, Vc11a240.22, Vc11a345.31, Vc11s241.32, Vc11s61.32, Vc12a323.22, Vc12a78.41, Vc12a80.32, Vc12p83.4, Vc13a136.41, Vc13a136.42, Vc13a138.30, Vc13a159.12, Vc13a238.27, Vc13a337.31, Vc13p136.9, Vc1452a0.4, Vc14a192.34, Vc14p365.2, Vc14s19.34, Vc14s282.27, Vc15a235.26, Vc15a239.39, Vc15s334.29, Vc16a105.25, Vc17a376.26, Vc17a387.47…	179	7813	435	52010	0.4115	6.29117e-40	****	1.68216e-37	****	Ex vs Se		13	GO:0005975	BP	carbohydrate metabolic process	Novel4981, Novel5484, Vc10a135.35, Vc10a136.27, Vc10a137.20, Vc10s13.30, Vc11a296.20, Vc11a305.23, Vc11a394.26, Vc11p335.2, Vc11p335.5, Vc11p90.11, Vc11s279.31, Vc11s334.37, Vc11s398.32, Vc126s3.69, Vc12a10.30, Vc12a12.37, Vc12p12.12, Vc12p382.8, Vc12s353.27, Vc1326a0.7, Vc13a314.25, Vc13a355.23, Vc13a98.30, Vc13p40.9, Vc148s1.45, Vc14a255.30, Vc14a352.33, Vc14a377.25, Vc14a385.20, Vc14a76.19, Vc…	234	9109	607	52010	0.3855	5.44078e-35	****	1.63307e-32	****	Se vs Sa		GO:0005975	BP
14	GO:0009800	BP	cinnamic acid biosynthetic process	Vc10a222.29, Vc10p225.6, Vc11p299.22, Vc15a283.32, Vc19a331.32, Vc1a185.22, Vc1a186.19, Vc1a187.25, Vc24a101.15, Vc26a180.26, Vc29a173.18, Vc33a169.12, Vc5a235.33, Vc5s236.31, Vc5s236.34, Vc8a235.20, Vc8a235.22, Vc8a236.15	18	1861	20	52010	0.9	1.51501e-24	****	1.60916e-22	****	Ex vs Sa		14	GO:0004497	MF	monooxygenase activity	Novel0283, Novel0349, Vc10a192.35, Vc10a348.25, Vc112a0.32, Vc112a3.47, Vc11a240.22, Vc11a345.31, Vc11s241.32, Vc12a323.22, Vc12a78.41, Vc12a80.32, Vc12p83.4, Vc12s239.28, Vc13a136.41, Vc13a136.42, Vc13a138.30, Vc13a159.12, Vc13a238.27, Vc13p136.9, Vc1452a0.4, Vc14a192.34, Vc14p365.2, Vc14s19.34, Vc14s282.27, Vc15a235.26, Vc15a239.39, Vc15s334.29, Vc176a1.60, Vc17a387.47, Vc17s291.34, Vc19s103.25…	151	7813	336	52010	0.4494	2.62595e-39	****	6.51986e-37	****	Ex vs Se		14	GO:0016491	MF	oxidoreductase activity	Novel0828, Novel4753, Novel5327, Vc1006a0.7, Vc10a375.26, Vc10p177.14, Vc10s119.52, Vc1169p0.0, Vc11a174.16, Vc11a175.24, Vc11a28.38, Vc11a349.43, Vc11a361.31, Vc11a371.32, Vc11p246.8, Vc11s40.22, Vc1260a0.2, Vc126p0.2, Vc12a381.27, Vc12a46.45, Vc12p109.7, Vc12s46.60, Vc13a41.36, Vc13p89.2, Vc140a2.69, Vc14a164.30, Vc14a174.42, Vc14a21.24, Vc14a256.29, Vc14a358.35, Vc14a389.31, Vc14a390.39, Vc14p…	239	9109	656	52010	0.3643	2.58141e-31	****	7.19477e-29	****	Se vs Sa		GO:0009800	BP
15	GO:0006633	BP	fatty acid biosynthetic process	Novel3199, Vc10s322.15, Vc11a53.18, Vc13p97.14, Vc14a212.26, Vc14a275.23, Vc15a60.24, Vc16s40.47, Vc19a155.20, Vc19a57.30, Vc19s130.30, Vc1a90.20, Vc20a127.40, Vc20a60.39, Vc24a329.18, Vc25a245.28, Vc25a318.31, Vc25p250.8, Vc269p0.23, Vc28a219.27, Vc2a248.22, Vc2a302.39, Vc2a322.25, Vc30a274.36, Vc35a318.30, Vc35s201.18, Vc36p156.4, Vc3a133.27, Vc3a82.27, Vc42s42.34, Vc43s57.35, Vc47a144.33, Vc48…	46	1861	197	52010	0.2335	1.88837e-24	****	1.872e-22	****	Ex vs Sa		15	GO:0038023	MF	signaling receptor activity	Vc1032p0.1, Vc10a364.26, Vc10a380.40, Vc10a380.41, Vc10a381.28, Vc10a381.30, Vc10a381.33, Vc10s381.47, Vc10s382.22, Vc1233s0.10, Vc1249a0.3, Vc12a107.49, Vc12a302.25, Vc12a376.30, Vc13p108.1, Vc13p7.3, Vc14p171.3, Vc14p50.7, Vc16a127.36, Vc16p128.2, Vc18a267.24, Vc1a22.33, Vc1a22.34, Vc1a22.44, Vc1a323.25, Vc20a12.22, Vc21a306.25, Vc22p173.7, Vc23a305.41, Vc23a58.37, Vc23a89.30, Vc23p24.1, Vc28s1…	85	7813	129	52010	0.6589	4.31596e-39	****	1.00015e-36	****	Ex vs Se		15	GO:0005634	CC	nucleus	Novel0042, Novel0103, Novel0194, Novel0763, Novel0967, Novel1110, Novel1226, Novel1845, Novel1972, Novel1996, Novel2231, Novel2262, Novel2351, Novel2432, Novel2876, Novel2908, Novel2932, Novel3475, Novel3832, Novel4130, Novel4402, Novel4490, Novel4493, Novel4811, Novel4883, Novel5028, Novel5261, Novel5317, Novel5327, Novel5376, Novel5474, Novel5505, Vc102a1.33, Vc1047p0.1, Vc105a4.47, Vc108a3.29,…	1339	9109	5803	52010	0.2307	1.4119e-30	****	3.67283e-28	****	Se vs Sa		GO:0006633	BP
16	GO:0004672	MF	protein kinase activity	Vc10a364.26, Vc10p363.8, Vc11a269.29, Vc11a285.25, Vc12a107.49, Vc138a2.27, Vc13a104.25, Vc13s19.28, Vc14a133.25, Vc14s334.52, Vc15a255.20, Vc15a269.38, Vc15a333.29, Vc17a271.47, Vc17a56.35, Vc17a56.37, Vc17s330.41, Vc17s56.40, Vc17s56.41, Vc18a292.22, Vc19a301.22, Vc19a303.28, Vc19a317.42, Vc19a366.33, Vc19p23.4, Vc1a2.20, Vc1a323.25, Vc20a135.31, Vc20a32.24, Vc20p23.9, Vc21a306.25, Vc21a378.44,…	99	1861	870	52010	0.1138	5.15503e-24	****	4.79096e-22	****	Ex vs Sa		16	GO:0009734	BP	auxin-activated signaling pathway	Novel3042, Vc10a224.19, Vc10a319.37, Vc10p196.15, Vc10p40.9, Vc10s177.20, Vc1139p0.1, Vc11a182.29, Vc11a269.29, Vc11a302.17, Vc11a307.39, Vc11a371.31, Vc11s371.38, Vc12a29.28, Vc12s18.50, Vc130a1.37, Vc13a115.23, Vc13a19.18, Vc13s57.53, Vc14a47.26, Vc14s250.38, Vc14s344.50, Vc151a0.26, Vc15a159.11, Vc15a255.20, Vc15a364.31, Vc15s258.34, Vc15s289.32, Vc16a1.31, Vc16a1.33, Vc16a348.29, Vc16a95.34, …	145	7813	317	52010	0.4574	6.84884e-39	****	1.48791e-36	****	Ex vs Se		16	GO:0020037	MF	heme binding	Novel0283, Vc10a348.25, Vc10s168.38, Vc10s232.19, Vc115a1.24, Vc11a240.22, Vc11a345.31, Vc11p309.17, Vc11s61.32, Vc12a78.41, Vc12a84.45, Vc12p109.7, Vc12p83.4, Vc12s106.30, Vc12s17.25, Vc12s29.38, Vc13a136.41, Vc13a136.42, Vc13a138.30, Vc13p136.9, Vc13p8.4, Vc13s100.34, Vc13s159.19, Vc13s302.30, Vc13s53.55, Vc1410a0.7, Vc1452a0.4, Vc14a192.34, Vc14a358.35, Vc14s282.27, Vc14s322.43, Vc14s362.36, V…	190	9109	502	52010	0.3785	1.62928e-27	****	3.9734e-25	****	Se vs Sa		GO:0004672	MF
17	GO:0006952	BP	defense response	Vc10a380.40, Vc10a381.28, Vc10a381.30, Vc10a381.33, Vc10p26.5, Vc10s381.47, Vc10s82.28, Vc11s279.31, Vc12a10.30, Vc12a37.34, Vc12p375.8, Vc12p382.8, Vc1338a0.7, Vc13a314.25, Vc14a273.30, Vc16a1.31, Vc16a182.29, Vc16a357.36, Vc16p172.0, Vc16p382.10, Vc16s358.37, Vc16s74.45, Vc17a317.37, Vc17s148.29, Vc17s264.49, Vc18a14.32, Vc19a311.28, Vc19p28.10, Vc1a22.33, Vc1a22.34, Vc1a22.44, Vc20a302.16, Vc2…	90	1861	741	52010	0.1215	6.7476e-24	****	5.90217e-22	****	Ex vs Sa		17	GO:0009813	BP	flavonoid biosynthetic process	Novel3202, Novel4416, Novel4995, Vc10a113.26, Vc10p159.9, Vc11p337.3, Vc11p356.13, Vc12a74.33, Vc12a74.34, Vc12p300.7, Vc13a19.21, Vc13a238.27, Vc13a41.36, Vc13a46.32, Vc13p70.2, Vc13p70.4, Vc13s19.30, Vc14a212.26, Vc14a326.39, Vc14s354.49, Vc14s6.29, Vc15a348.41, Vc16a381.32, Vc16p23.9, Vc18a373.31, Vc18a76.26, Vc19a256.19, Vc19p4.6, Vc1a373.37, Vc1p272.1, Vc1s317.29, Vc200s1.44, Vc20a45.21, Vc2…	105	7813	191	52010	0.5497	1.59495e-37	****	3.10562e-35	****	Ex vs Se		17	GO:0016310	BP	phosphorylation	Novel2376, Novel2630, Novel4561, Novel4811, Novel5165, Novel5248, Novel5261, Vc102a1.29, Vc10a149.15, Vc10a198.17, Vc10a209.25, Vc10a221.32, Vc10a255.15, Vc10a258.25, Vc10a258.27, Vc10a334.32, Vc10a34.29, Vc10a365.35, Vc10a373.31, Vc10p119.3, Vc10p178.7, Vc10p234.4, Vc10p322.0, Vc10s107.31, Vc10s292.17, Vc10s317.27, Vc10s378.40, Vc10s399.42, Vc10s48.32, Vc10s82.28, Vc113p3.2, Vc1150p0.6, Vc11a130…	727	9109	2877	52010	0.2527	3.72211e-27	****	8.54333e-25	****	Se vs Sa		GO:0006952	BP
18	GO:0140359	MF	ABC-type transporter activity	Vc10p144.11, Vc11a54.15, Vc12a51.41, Vc14s46.29, Vc15a61.19, Vc15p269.4, Vc19a116.37, Vc19a156.18, Vc19p318.4, Vc1a11.39, Vc20a115.29, Vc22a179.20, Vc22p242.4, Vc24a114.29, Vc24s329.29, Vc25s44.35, Vc26p167.7, Vc28a239.25, Vc29p164.1, Vc29s266.27, Vc2s62.24, Vc33a125.24, Vc33a81.36, Vc34a25.19, Vc35a266.25, Vc35s232.29, Vc38a182.23, Vc3a31.27, Vc3a382.27, Vc43a185.32, Vc46a59.29, Vc47s56.18, Vc48…	42	1861	169	52010	0.2485	1.39224e-23	****	1.15015e-21	****	Ex vs Sa		18	GO:0016491	MF	oxidoreductase activity	Novel0044, Novel0828, Novel0854, Novel4753, Novel5327, Vc10a375.26, Vc10p177.14, Vc10s119.52, Vc11a174.16, Vc11a238.26, Vc11a269.31, Vc11a28.38, Vc11a349.43, Vc11a356.35, Vc11a361.31, Vc11p246.8, Vc1260a0.2, Vc126p0.2, Vc12a381.27, Vc12a46.45, Vc12p109.7, Vc12s46.60, Vc13a41.36, Vc13p89.2, Vc1466a0.2, Vc14a164.30, Vc14a174.42, Vc14a256.29, Vc14a358.35, Vc14a389.31, Vc14p380.8, Vc14s104.27, Vc14s1…	230	7813	656	52010	0.3506	1.6082e-37	****	3.10562e-35	****	Ex vs Se		18	GO:0006817	BP	phosphate ion transport	Novel0206, Novel2071, Vc10a260.15, Vc10a278.16, Vc10a82.22, Vc10p255.13, Vc10p275.3, Vc10p291.7, Vc10s13.29, Vc115p2.20, Vc11a167.32, Vc11a297.22, Vc12a215.16, Vc12a248.27, Vc12s128.53, Vc136a3.21, Vc13a318.39, Vc13s269.25, Vc13s73.43, Vc13s98.35, Vc14a116.32, Vc14a179.34, Vc14a388.29, Vc14s313.40, Vc15a159.14, Vc15a315.31, Vc15a332.33, Vc1696a0.2, Vc16a390.30, Vc16a6.43, Vc16a6.45, Vc16a9.30, Vc…	150	9109	361	52010	0.4155	7.06673e-27	****	1.53191e-24	****	Se vs Sa		GO:0140359	MF
19	GO:0030247	MF	polysaccharide binding	Vc18a292.22, Vc20a135.31, Vc287s0.54, Vc28a212.19, Vc2a101.19, Vc31a14.24, Vc35a240.35, Vc36a110.25, Vc37s84.37, Vc37s86.25, Vc38a194.27, Vc38a194.30, Vc38a195.18, Vc38p195.2, Vc38s195.20, Vc39a215.22, Vc39a223.17, Vc39p218.7, Vc44s68.26, Vc6a169.36, Vc6p169.15, Vc6s168.17, Vc6s169.44, Vc6s172.18, Vc6s172.20, Vc716a0.13	26	1861	56	52010	0.4643	4.94182e-23	****	3.86762e-21	****	Ex vs Sa		19	GO:0046872	MF	metal ion binding	Novel0763, Novel0966, Novel1477, Novel2001, Novel2169, Novel2248, Novel2761, Novel3418, Novel4100, Novel4144, Novel5261, Novel5505, Vc102a1.29, Vc106a1.22, Vc106a4.43, Vc10a105.22, Vc10a110.29, Vc10a136.27, Vc10a137.20, Vc10a161.18, Vc10a174.12, Vc10a24.27, Vc10a342.29, Vc10a356.15, Vc10a387.25, Vc10a66.26, Vc10a68.39, Vc10a82.22, Vc10a90.16, Vc10a92.18, Vc10p81.9, Vc10p94.1, Vc10s232.19, Vc10s26…	707	7813	3005	52010	0.2353	6.37829e-37	****	1.16689e-34	****	Ex vs Se		19	GO:0016787	MF	hydrolase activity	Novel1110, Novel1889, Novel1890, Novel2932, Novel5002, Vc10a114.32, Vc10a114.36, Vc10a121.22, Vc10a198.18, Vc10a224.19, Vc10a260.15, Vc10a325.23, Vc10a336.30, Vc10a345.26, Vc10a385.43, Vc10s317.27, Vc10s349.28, Vc10s349.30, Vc10s38.38, Vc10s80.33, Vc113p3.2, Vc1176p0.0, Vc117s3.75, Vc11a249.25, Vc11a383.35, Vc11a394.26, Vc11a8.21, Vc11p224.2, Vc120a3.48, Vc126a0.20, Vc12a100.19, Vc12a346.39, Vc12…	423	9109	1504	52010	0.2812	3.67129e-25	****	7.53966e-23	****	Se vs Sa		GO:0030247	MF
20	GO:0016114	BP	terpenoid biosynthetic process	Vc10a192.35, Vc12a323.22, Vc12a395.19, Vc13p8.4, Vc1a241.25, Vc20a68.33, Vc20a68.35, Vc21a13.24, Vc22a304.29, Vc23a68.32, Vc23a68.33, Vc26s130.36, Vc28a290.34, Vc29a7.44, Vc29s127.41, Vc302a0.32, Vc30p264.5, Vc33p307.8, Vc33s210.34, Vc35s263.41, Vc36a83.20, Vc37p212.7, Vc40a218.18, Vc40p218.4, Vc41a202.31, Vc41a203.19, Vc43a72.30, Vc46a151.30, Vc47a126.34, Vc55a10.22, Vc61a7.13, Vc6s17.38, Vc8a20…	34	1861	111	52010	0.3063	1.41335e-22	****	1.01215e-20	****	Ex vs Sa		20	GO:0005737	CC	cytoplasm	Novel0710, Novel0854, Novel1225, Novel1844, Novel1883, Novel4396, Novel5013, Novel5028, Vc106a4.45, Vc10a161.18, Vc10a198.18, Vc10a199.19, Vc10a2.36, Vc10a209.25, Vc10a222.29, Vc10a222.30, Vc10a316.34, Vc10a317.18, Vc10a331.29, Vc10a334.32, Vc10a342.29, Vc10a380.40, Vc10a381.28, Vc10a381.30, Vc10a381.33, Vc10a387.25, Vc10p225.6, Vc10s243.33, Vc10s317.27, Vc10s325.25, Vc10s63.37, Vc1141a0.6, Vc114…	872	7813	3959	52010	0.2203	1.73374e-34	****	3.01324e-32	****	Ex vs Se		20	GO:0016887	MF	ATP hydrolysis activity	Novel0855, Novel2556, Novel4811, Vc1081a0.8, Vc10a163.29, Vc10a371.19, Vc10p372.3, Vc10p62.13, Vc11a361.31, Vc11p330.36, Vc11p387.2, Vc11s329.68, Vc11s329.75, Vc11s359.47, Vc1269a0.3, Vc12a40.49, Vc12s7.46, Vc131a3.40, Vc136a1.27, Vc13a239.16, Vc13a83.25, Vc13s282.38, Vc13s285.50, Vc13s86.26, Vc13s92.35, Vc14a264.33, Vc14a307.32, Vc14p326.33, Vc14s46.29, Vc150a0.17, Vc1541a0.2, Vc157a2.45, Vc15a2…	290	9109	931	52010	0.3115	1.06843e-24	****	2.08451e-22	****	Se vs Sa		GO:0016114	BP
21	GO:0016310	BP	phosphorylation	Novel0709, Novel2376, Novel4144, Novel5248, Vc103a1.29, Vc10a364.26, Vc10p322.0, Vc10p363.8, Vc10s82.28, Vc11a130.24, Vc11a222.37, Vc11a269.29, Vc11a285.25, Vc11a399.31, Vc12a107.49, Vc133a2.18, Vc138a2.27, Vc13a104.25, Vc13a114.33, Vc13s19.28, Vc14a133.25, Vc14a215.24, Vc14a224.22, Vc14a365.29, Vc14p162.0, Vc14p171.3, Vc151a2.48, Vc151p1.1, Vc151s0.37, Vc1533a0.4, Vc15a122.20, Vc15a215.31, Vc15a…	209	1861	2877	52010	0.0726	1.42939e-22	****	1.01215e-20	****	Ex vs Sa		21	GO:0016310	BP	phosphorylation	Novel0402, Novel0710, Novel2630, Novel3292, Novel4144, Novel4561, Novel4811, Novel5165, Novel5261, Vc102a1.29, Vc1032p0.1, Vc103a1.29, Vc10a11.27, Vc10a149.15, Vc10a151.18, Vc10a209.25, Vc10a258.25, Vc10a258.27, Vc10a334.32, Vc10a364.26, Vc10p119.3, Vc10p234.4, Vc10p322.0, Vc10p363.8, Vc10s292.17, Vc10s317.27, Vc10s399.42, Vc113p3.2, Vc1150p0.6, Vc11a2.25, Vc11a222.37, Vc11a269.29, Vc11a285.25, V…	668	7813	2877	52010	0.2322	4.59851e-33	****	7.61163e-31	****	Ex vs Se		21	GO:0050896	BP	response to stimulus	Vc10a260.15, Vc10a82.22, Vc10p255.13, Vc10p275.3, Vc10p291.7, Vc1150p0.6, Vc11a167.32, Vc12a215.16, Vc12a248.27, Vc12s128.53, Vc136a3.21, Vc13a318.39, Vc13s269.25, Vc13s73.43, Vc14a179.34, Vc14s313.40, Vc15a159.14, Vc15a315.31, Vc15a332.33, Vc1617s0.4, Vc16a6.43, Vc16a6.45, Vc16a9.30, Vc17a253.29, Vc17a254.22, Vc17a337.40, Vc17s200.26, Vc18s102.25, Vc19a127.27, Vc19a235.34, Vc19a326.36, Vc19s360.…	132	9109	317	52010	0.4164	6.15288e-24	****	1.14326e-21	****	Se vs Sa		GO:0016310	BP
22	GO:0006558	BP	L-phenylalanine metabolic process	Vc10a222.29, Vc10p225.6, Vc11a288.26, Vc11p299.22, Vc15a272.36, Vc15a283.32, Vc19a320.28, Vc19a331.32, Vc1a185.22, Vc1a186.19, Vc1a187.25, Vc24a101.15, Vc24a111.29, Vc26a180.26, Vc29a173.18, Vc33a169.12, Vc47p59.3, Vc5a235.33, Vc5s236.31, Vc5s236.34, Vc8a235.20, Vc8a235.22, Vc8a236.15	23	1861	46	52010	0.5	1.77193e-21	****	1.19766e-19	****	Ex vs Sa		22	GO:0050832	BP	defense response to fungus	Novel0761, Vc10a364.26, Vc10a68.39, Vc10p363.8, Vc1139p0.1, Vc11p32.6, Vc11s344.28, Vc1249a0.3, Vc12a100.16, Vc12a107.49, Vc12a382.41, Vc12s44.37, Vc13a23.31, Vc13p108.1, Vc13p284.3, Vc13p7.3, Vc13p89.2, Vc13s134.35, Vc14a76.19, Vc14a79.31, Vc14p124.11, Vc14p171.3, Vc14p363.21, Vc15a333.29, Vc16a127.36, Vc16a95.34, Vc16p128.2, Vc17a269.36, Vc17a321.35, Vc17a364.31, Vc17p92.9, Vc17s177.25, Vc188a1…	151	7813	378	52010	0.3995	3.54688e-32	****	5.60407e-30	****	Ex vs Se		22	GO:0005874	CC	microtubule	Vc10a121.22, Vc10a345.26, Vc10s377.34, Vc10s378.40, Vc10s5.38, Vc11a245.18, Vc11a8.21, Vc11p339.11, Vc12a300.32, Vc13a108.11, Vc13a287.20, Vc13a78.32, Vc13s285.50, Vc15p329.28, Vc16a348.28, Vc16a381.41, Vc17a17.16, Vc17s221.33, Vc18a15.26, Vc18a48.38, Vc1a309.26, Vc1a31.30, Vc1p417.8, Vc1s441.33, Vc20a291.18, Vc20s322.41, Vc21a78.15, Vc21p266.4, Vc22a117.29, Vc22a135.25, Vc22a146.22, Vc22s42.45, …	93	9109	188	52010	0.4947	1.10799e-23	****	1.96517e-21	****	Se vs Sa		GO:0006558	BP
23	GO:0009074	BP	aromatic amino acid family catabolic process	Vc10a222.29, Vc10p225.6, Vc11p299.22, Vc15a283.32, Vc19a331.32, Vc1a185.22, Vc1a186.19, Vc1a187.25, Vc24a101.15, Vc26a180.26, Vc29a173.18, Vc33a169.12, Vc5a235.33, Vc5s236.31, Vc5s236.34, Vc8a235.20, Vc8a235.22, Vc8a236.15	18	1861	25	52010	0.72	3.23136e-21	****	2.08915e-19	****	Ex vs Sa		23	GO:0005634	CC	nucleus	Novel0042, Novel0103, Novel0402, Novel0710, Novel0763, Novel0883, Novel0967, Novel1110, Novel1996, Novel2231, Novel2262, Novel2908, Novel3292, Novel3832, Novel4130, Novel4416, Novel4490, Novel4493, Novel4811, Novel4883, Novel5028, Novel5261, Novel5317, Novel5327, Novel5474, Novel5505, Vc102a1.33, Vc1047p0.1, Vc105a4.47, Vc1069a0.8, Vc108a3.29, Vc10a151.18, Vc10a175.17, Vc10a198.18, Vc10a199.19, V…	1182	7813	5803	52010	0.2037	1.36459e-31	****	2.06231e-29	****	Ex vs Se		23	GO:0046527	MF	glucosyltransferase activity	Novel4517, Novel4995, Vc10a113.26, Vc10a113.31, Vc12a74.33, Vc12a74.34, Vc12p300.7, Vc13a19.21, Vc13p70.2, Vc13p70.4, Vc13s19.30, Vc14a326.39, Vc14s307.43, Vc14s354.49, Vc14s6.29, Vc16s325.47, Vc17s232.19, Vc18a76.26, Vc1a316.27, Vc1s317.29, Vc200s1.44, Vc20a45.21, Vc20a47.45, Vc21p238.1, Vc21p49.17, Vc22p189.5, Vc23a248.45, Vc23a338.19, Vc23a338.21, Vc23p90.4, Vc23s337.40, Vc23s338.28, Vc26p234.…	73	9109	129	52010	0.5659	1.91293e-23	****	3.24532e-21	****	Se vs Sa		GO:0009074	BP
24	GO:0005524	MF	ATP binding	Novel0854, Novel5248, Vc103a1.29, Vc10a364.26, Vc10p144.11, Vc10p322.0, Vc10p363.8, Vc10s82.28, Vc11a145.15, Vc11a269.29, Vc11a285.25, Vc11a54.15, Vc11s329.68, Vc11s329.75, Vc12a107.49, Vc12a51.41, Vc133a2.18, Vc138a2.27, Vc13a104.25, Vc13a114.33, Vc13s19.28, Vc14a133.25, Vc14s334.52, Vc14s46.29, Vc151a2.48, Vc151p1.1, Vc151s0.37, Vc1533a0.4, Vc15a134.19, Vc15a255.20, Vc15a269.38, Vc15a333.29, Vc…	263	1861	4105	52010	0.0641	1.18724e-20	****	7.35592e-19	****	Ex vs Sa		24	GO:0043531	MF	ADP binding	Novel1860, Vc10a163.27, Vc10a163.29, Vc10p62.13, Vc10s119.52, Vc111p1.11, Vc1177a0.5, Vc1335p0.1, Vc13s134.35, Vc14p37.5, Vc14s340.48, Vc14s37.41, Vc16a237.22, Vc16p172.0, Vc16p5.1, Vc16s59.47, Vc16s74.45, Vc17a145.18, Vc17a3.20, Vc17s136.34, Vc17s147.37, Vc18a338.26, Vc18p346.9, Vc18p379.6, Vc1a311.34, Vc1a362.25, Vc1p365.21, Vc20a257.23, Vc20p282.2, Vc20p283.6, Vc20p283.9, Vc20s256.34, Vc20s257…	87	7813	170	52010	0.5118	2.53959e-28	****	3.67818e-26	****	Ex vs Se		24	GO:0009734	BP	auxin-activated signaling pathway	Novel3042, Vc10a224.19, Vc10p196.15, Vc10s177.20, Vc11a182.29, Vc11a302.17, Vc11a307.39, Vc11a382.39, Vc11s371.38, Vc12a165.25, Vc12a29.28, Vc12s18.50, Vc130a1.37, Vc13a115.23, Vc13a19.18, Vc13a33.40, Vc14s344.50, Vc151a0.26, Vc15a159.11, Vc15s258.34, Vc15s289.32, Vc16a1.33, Vc16a348.29, Vc16a95.34, Vc16s123.42, Vc17a355.30, Vc17s1.16, Vc17s292.36, Vc18a271.38, Vc18a348.32, Vc18a382.64, Vc18s48.4…	131	9109	317	52010	0.4132	2.08872e-23	****	3.39591e-21	****	Se vs Sa		GO:0005524	MF
25	GO:0009714	BP	chalcone metabolic process	Novel3539, Novel4416, Vc13a46.32, Vc25a173.26, Vc2a67.14, Vc30a303.29, Vc32a318.21, Vc35a1.21, Vc3a334.17, Vc42a14.30, Vc4p104.3, Vc9p64.0	12	1861	12	52010	1	4.25629e-18	****	2.53164e-16	****	Ex vs Sa		25	GO:0006817	BP	phosphate ion transport	Vc10a260.15, Vc10a342.30, Vc10a82.22, Vc10p275.3, Vc10p291.7, Vc10s13.29, Vc115p2.20, Vc11a167.32, Vc11a297.22, Vc12a215.16, Vc12a248.27, Vc12s128.53, Vc13a268.27, Vc14a115.38, Vc14a116.32, Vc14a179.34, Vc14a192.36, Vc14a388.29, Vc14s313.40, Vc15a159.14, Vc15a315.31, Vc16a390.30, Vc16a6.43, Vc16a6.45, Vc16a9.30, Vc17a253.28, Vc17a253.29, Vc17a254.22, Vc17a337.40, Vc17s200.26, Vc18s102.19, Vc18s10…	137	7813	361	52010	0.3795	1.01716e-26	****	1.41426e-24	****	Ex vs Se		25	GO:0005773	CC	vacuole	Vc10a149.15, Vc1127a0.6, Vc11a305.23, Vc11p246.8, Vc1215a0.4, Vc126s3.69, Vc12a10.30, Vc12a108.20, Vc12s128.53, Vc138a0.21, Vc13a314.25, Vc13a355.23, Vc13s15.44, Vc13s86.26, Vc14a325.38, Vc14a372.28, Vc14a377.25, Vc14a7.27, Vc153a2.51, Vc15p243.0, Vc16a122.23, Vc16a256.16, Vc17a383.21, Vc18a146.17, Vc19a62.27, Vc19a68.52, Vc20a72.59, Vc21a334.28, Vc22a228.22, Vc22a263.37, Vc23a304.28, Vc23s287.27…	108	9109	239	52010	0.4519	3.245e-23	****	5.0648e-21	****	Se vs Sa		GO:0009714	BP
26	GO:0004864	MF	protein phosphatase inhibitor activity	Vc10a380.40, Vc10a381.28, Vc10a381.30, Vc10a381.33, Vc10s381.47, Vc1a22.33, Vc1a22.34, Vc1a22.44, Vc20a352.37, Vc28a25.27, Vc35a213.33, Vc36a135.32, Vc44a16.23, Vc49a28.31, Vc4a307.29, Vc5a19.35, Vc5a19.38, Vc5a20.29, Vc8a391.32, Vc8a392.32, Vc8a393.32, Vc8s393.37, Vc9a281.33	23	1861	61	52010	0.377	4.82077e-18	****	2.75711e-16	****	Ex vs Sa		26	GO:0009408	BP	response to heat	Novel1844, Vc10p331.23, Vc11a233.23, Vc12a270.28, Vc13a83.25, Vc14a208.25, Vc14a287.24, Vc14a325.38, Vc14p261.41, Vc15a227.19, Vc15p329.2, Vc16a230.18, Vc16p71.20, Vc17a163.18, Vc17a163.19, Vc17a22.22, Vc17a321.35, Vc17a341.47, Vc17p92.9, Vc18a174.24, Vc18s145.24, Vc19p357.13, Vc19p46.20, Vc19s349.40, Vc1p80.9, Vc21a241.21, Vc21p134.1, Vc21p349.5, Vc22s37.47, Vc23a139.21, Vc24a160.31, Vc24a279.22…	97	7813	214	52010	0.4533	3.88124e-26	****	5.18892e-24	****	Ex vs Se		26	GO:0001067	MF	transcription regulatory region nucleic acid binding	Novel0763, Novel0967, Novel2231, Novel2432, Novel2908, Novel4490, Vc1047p0.1, Vc105a4.47, Vc10a199.19, Vc11a110.26, Vc11p335.2, Vc11p335.5, Vc11s334.37, Vc126a3.49, Vc12a144.13, Vc12p209.5, Vc12s296.36, Vc14a376.24, Vc14a54.29, Vc15a106.16, Vc15a315.33, Vc15a332.31, Vc15p325.15, Vc15s324.35, Vc1617s0.4, Vc16a318.35, Vc16a61.39, Vc16s375.36, Vc17a255.43, Vc17a83.25, Vc17p111.21, Vc17s186.26, Vc17s…	124	9109	297	52010	0.4175	1.06433e-22	****	1.59731e-20	****	Se vs Sa		GO:0004864	MF
27	GO:0002238	BP	response to molecule of fungal origin	Novel0966, Novel2248, Vc11s212.32, Vc11s369.50, Vc15s205.28, Vc1a398.30, Vc20a269.18, Vc21p224.11, Vc22a131.24, Vc28s139.28, Vc29a246.26, Vc29s213.42, Vc2a379.38, Vc2s416.46, Vc33a131.36, Vc33a61.31, Vc33p61.8, Vc38a291.14, Vc3a29.38, Vc3s6.50, Vc41a187.32, Vc43a37.30, Vc43p36.14, Vc46a11.23, Vc46a171.29, Vc46a172.36, Vc5a375.24, Vc5a375.25, Vc8a52.29	29	1861	106	52010	0.2736	5.71481e-18	****	3.14738e-16	****	Ex vs Sa		27	GO:0001067	MF	transcription regulatory region nucleic acid binding	Novel0763, Novel0967, Novel2231, Novel2908, Novel4490, Vc1047p0.1, Vc105a4.47, Vc10a199.19, Vc10a95.34, Vc11a110.26, Vc11a207.26, Vc11p335.2, Vc11p335.5, Vc126a3.49, Vc12s296.36, Vc14a376.24, Vc14a54.29, Vc15a106.16, Vc15a200.28, Vc15a315.33, Vc15a332.31, Vc15a360.46, Vc1617s0.4, Vc16s375.36, Vc17a83.25, Vc17p111.21, Vc17s284.47, Vc17s59.28, Vc18a83.29, Vc18p335.5, Vc18s180.19, Vc19a273.26, Vc19a…	119	7813	297	52010	0.4007	8.22745e-26	****	1.05921e-23	****	Ex vs Se		27	GO:0008194	MF	UDP-glycosyltransferase activity	Novel4517, Novel4995, Vc10a113.26, Vc10a113.31, Vc10p159.9, Vc12a74.33, Vc12a74.34, Vc12p300.7, Vc13a19.21, Vc13a275.34, Vc13p70.2, Vc13p70.4, Vc13s19.30, Vc14a326.39, Vc14s307.43, Vc14s354.49, Vc14s6.29, Vc16s325.47, Vc17s232.19, Vc18a76.26, Vc1a316.27, Vc1a318.41, Vc1p272.1, Vc1s317.29, Vc200s1.44, Vc20a45.21, Vc20a47.45, Vc20a68.36, Vc21p238.1, Vc21p49.17, Vc22p189.5, Vc23a248.45, Vc23a338.19,…	91	9109	190	52010	0.4789	5.89508e-22	****	8.51949e-20	****	Se vs Sa		GO:0002238	BP
28	GO:0004553	MF	hydrolase activity, hydrolyzing O-glycosyl compounds	Vc11s334.37, Vc12a298.31, Vc12p12.12, Vc14a255.30, Vc1584a0.5, Vc15s324.35, Vc19a26.20, Vc19a311.28, Vc22a67.34, Vc22p271.9, Vc23a93.31, Vc2a301.24, Vc33a101.20, Vc34a17.21, Vc34a25.19, Vc35a208.17, Vc37a35.39, Vc38p27.7, Vc39p25.5, Vc3p112.1, Vc40a192.14, Vc40a193.25, Vc41a181.26, Vc43a116.33, Vc46a100.23, Vc46a124.34, Vc47a187.41, Vc47p89.9, Vc48p89.5, Vc52a15.38, Vc6a253.9, Vc6a389.35, Vc6p389…	35	1861	177	52010	0.1977	1.59004e-16	****	8.44427e-15	****	Ex vs Sa		28	GO:0003677	MF	DNA binding	Novel0763, Novel0967, Novel1055, Novel1477, Novel2262, Novel2480, Novel2761, Novel3418, Novel3465, Novel3832, Novel3855, Novel4130, Novel4490, Novel5261, Novel5327, Novel5505, Vc102a4.41, Vc1047p0.1, Vc106a4.43, Vc10a174.12, Vc10a199.19, Vc10a224.19, Vc10a231.21, Vc10a60.41, Vc10a60.47, Vc10a95.34, Vc10p358.4, Vc10p94.1, Vc10s399.42, Vc10s62.41, Vc115s2.58, Vc11a110.26, Vc11a176.30, Vc11a199.24, …	493	7813	2105	52010	0.2342	2.38825e-25	****	2.96484e-23	****	Ex vs Se		28	GO:0009813	BP	flavonoid biosynthetic process	Novel4517, Novel4995, Vc10a113.26, Vc10a113.31, Vc10p159.9, Vc12a74.33, Vc12a74.34, Vc12p300.7, Vc13a19.21, Vc13a41.36, Vc13p70.2, Vc13p70.4, Vc13s19.30, Vc14a326.39, Vc14s354.49, Vc14s6.29, Vc16a381.32, Vc17s232.19, Vc18a76.26, Vc19a256.19, Vc1a316.27, Vc1a318.41, Vc1a373.37, Vc1p272.1, Vc1s317.29, Vc200s1.44, Vc20a45.21, Vc20a47.45, Vc20a5.31, Vc20a68.36, Vc21a108.29, Vc21p238.1, Vc21p49.17, Vc…	89	9109	191	52010	0.466	1.69101e-20	****	2.35654e-18	****	Se vs Sa		GO:0004553	MF
29	GO:0009611	BP	response to wounding	Novel2248, Novel4416, Vc13a391.28, Vc13a46.32, Vc1533a0.4, Vc17p323.0, Vc188a0.17, Vc19p71.1, Vc22a131.24, Vc22a341.40, Vc26p329.6, Vc27p288.0, Vc29a17.47, Vc30a303.29, Vc32a318.21, Vc33a298.23, Vc34a17.21, Vc34p57.9, Vc36s167.30, Vc36s268.40, Vc42a14.30, Vc43a31.37, Vc43s8.49, Vc46a11.23, Vc47a135.34, Vc4a410.18, Vc50p21.6, Vc54a12.26, Vc57a6.30, Vc57a7.37, Vc71a2.23, Vc7p88.4, Vc9p405.15	33	1861	157	52010	0.2102	1.71915e-16	****	8.81507e-15	****	Ex vs Sa		29	GO:0015293	MF	symporter activity	Vc10a342.30, Vc10p196.15, Vc10p291.7, Vc10p40.9, Vc11a167.32, Vc11s371.38, Vc12a215.16, Vc12a336.20, Vc13s57.53, Vc14s344.50, Vc151a0.26, Vc15a159.14, Vc16a1.31, Vc16a1.33, Vc16a348.29, Vc17s292.36, Vc18a335.22, Vc18a382.64, Vc18s102.19, Vc18s102.25, Vc18s48.44, Vc19a235.34, Vc19a43.41, Vc19s65.38, Vc1a403.29, Vc1a459.29, Vc1a69.26, Vc1p115.0, Vc1s459.38, Vc20p35.35, Vc23a240.13, Vc23p356.19, Vc2…	75	7813	144	52010	0.5208	2.99544e-25	****	3.5904e-23	****	Ex vs Se		29	GO:0005506	MF	iron ion binding	Novel0283, Vc10a348.25, Vc10s168.38, Vc11a240.22, Vc11a345.31, Vc11s40.22, Vc11s61.32, Vc12a78.41, Vc12a84.45, Vc12p83.4, Vc12s106.30, Vc12s158.21, Vc13a136.41, Vc13a136.42, Vc13a138.30, Vc13a337.31, Vc13a37.37, Vc13p136.9, Vc13p8.4, Vc13s159.19, Vc1452a0.4, Vc14a192.34, Vc14s282.27, Vc14s391.35, Vc15a235.26, Vc15a239.39, Vc15s334.29, Vc16a105.25, Vc16a366.33, Vc17a387.47, Vc17s291.34, Vc18s292.3…	156	9109	435	52010	0.3586	3.54046e-20	****	4.76375e-18	****	Se vs Sa		GO:0009611	BP
30	GO:0006817	BP	phosphate ion transport	Vc10a278.16, Vc10a342.30, Vc10p255.13, Vc13a268.27, Vc13s269.25, Vc13s73.43, Vc14a115.38, Vc14a192.36, Vc15a141.15, Vc17a253.28, Vc17a253.29, Vc17s350.31, Vc19s226.15, Vc1a69.26, Vc21a188.12, Vc22a291.37, Vc26p190.13, Vc27a234.37, Vc27a313.28, Vc27p234.24, Vc29a17.49, Vc29p183.8, Vc2a232.32, Vc2a256.27, Vc30a132.30, Vc30a333.23, Vc30a343.52, Vc31s210.37, Vc32a291.34, Vc32a81.39, Vc33a297.25, Vc33…	50	1861	361	52010	0.1385	3.5711e-16	****	1.77007e-14	****	Ex vs Sa		30	GO:0050896	BP	response to stimulus	Vc10a260.15, Vc10a82.22, Vc10p275.3, Vc10p291.7, Vc1150p0.6, Vc11a167.32, Vc12a215.16, Vc12a248.27, Vc12s128.53, Vc13a268.27, Vc14a115.38, Vc14a179.34, Vc14s313.40, Vc15a159.14, Vc15a315.31, Vc1617s0.4, Vc16a6.43, Vc16a6.45, Vc16a9.30, Vc17a253.28, Vc17a253.29, Vc17a254.22, Vc17a337.40, Vc17a56.37, Vc17s200.26, Vc18s102.25, Vc19a127.27, Vc19a235.34, Vc19a326.36, Vc19s360.29, Vc1a149.10, Vc1a353.3…	123	7813	317	52010	0.388	3.82742e-25	****	4.4347e-23	****	Ex vs Se		30	GO:0030246	MF	carbohydrate binding	Novel2630, Novel3475, Novel4981, Novel5261, Novel5484, Vc1150p0.6, Vc11a305.23, Vc126s3.69, Vc12a390.20, Vc12a99.17, Vc13a355.23, Vc13s77.45, Vc13s83.32, Vc14a255.30, Vc14a377.25, Vc14p124.11, Vc14s22.27, Vc14s83.18, Vc15s234.41, Vc16s225.46, Vc17a169.23, Vc17a278.16, Vc17a383.21, Vc17a80.35, Vc17p169.6, Vc20a353.15, Vc20p343.1, Vc21a85.21, Vc21p27.11, Vc22a263.37, Vc22p147.6, Vc22s10.50, Vc23a31…	114	9109	281	52010	0.4057	8.1184e-20	****	1.05593e-17	****	Se vs Sa		GO:0006817	BP
31	GO:1902222	BP	erythrose 4-phosphate/phosphoenolpyruvate family amino acid catabolic process	Vc10a222.29, Vc10p225.6, Vc11p299.22, Vc15a283.32, Vc19a331.32, Vc1a185.22, Vc1a186.19, Vc1a187.25, Vc24a101.15, Vc26a180.26, Vc29a173.18, Vc33a169.12, Vc5a235.33, Vc5s236.31, Vc5s236.34, Vc8a235.20, Vc8a235.22, Vc8a236.15	18	1861	41	52010	0.439	7.87094e-16	****	3.77551e-14	****	Ex vs Sa		31	GO:0046527	MF	glucosyltransferase activity	Novel3202, Novel4995, Vc10a113.26, Vc11p337.3, Vc12a74.33, Vc12a74.34, Vc12p300.7, Vc13a19.21, Vc13p70.2, Vc13p70.4, Vc13s19.30, Vc14a326.39, Vc14s307.43, Vc14s354.49, Vc14s6.29, Vc16s325.47, Vc18a76.26, Vc18a76.29, Vc1s317.29, Vc200s1.44, Vc20a45.21, Vc20a47.45, Vc20a68.33, Vc21p238.1, Vc21p49.17, Vc22p189.5, Vc23a338.19, Vc23a338.21, Vc23p90.4, Vc23s337.40, Vc23s338.28, Vc26p234.1, Vc26s51.59, …	70	7813	129	52010	0.5426	4.59325e-25	****	5.15036e-23	****	Ex vs Se		31	GO:0005829	CC	cytosol	Novel1996, Novel4248, Novel5402, Vc1006a0.7, Vc10a105.22, Vc10a221.32, Vc10a249.13, Vc10a26.18, Vc10a30.27, Vc10a373.30, Vc10a397.21, Vc10p388.3, Vc10s168.38, Vc10s232.19, Vc10s377.34, Vc10s385.53, Vc10s5.33, Vc1142p0.2, Vc11a233.23, Vc11a242.24, Vc11a362.41, Vc11p335.2, Vc11p335.5, Vc11p349.6, Vc11p90.11, Vc11s221.30, Vc11s256.39, Vc11s334.37, Vc11s372.31, Vc120a3.48, Vc12a129.12, Vc12a138.21, V…	510	9109	2018	52010	0.2527	2.88016e-19	****	3.62528e-17	****	Se vs Sa		GO:1902222	BP
32	GO:0046593	MF	mandelonitrile lyase activity	Vc10a280.34, Vc11s364.56, Vc14a115.38, Vc14s112.39, Vc17s143.21, Vc25a146.28, Vc34s207.24, Vc34s208.24, Vc3a324.28, Vc5a117.19, Vc8s296.44	11	1861	12	52010	0.9167	1.38879e-15	****	6.45353e-14	****	Ex vs Sa		32	GO:0005773	CC	vacuole	Novel0044, Novel3666, Vc10a149.15, Vc1127a0.6, Vc11a305.23, Vc11p246.8, Vc1215a0.4, Vc126s3.69, Vc12a10.30, Vc12a108.20, Vc12a37.34, Vc12s128.53, Vc138a0.21, Vc13a355.23, Vc13a36.41, Vc14a325.38, Vc14a377.25, Vc153a2.51, Vc15p243.0, Vc16a122.23, Vc17a383.21, Vc18a146.17, Vc18p273.2, Vc19a62.27, Vc19a68.52, Vc19p289.3, Vc20a72.59, Vc20p377.3, Vc21a112.20, Vc21a112.21, Vc21a334.28, Vc21a8.22, Vc22a…	102	7813	239	52010	0.4268	7.25558e-25	****	7.88137e-23	****	Ex vs Se		32	GO:0016705	MF	oxidoreductase activity, acting on paired donors, with incorporation or reduction of molecular oxygen	Novel0283, Vc10a348.25, Vc10p81.9, Vc10s168.38, Vc11a240.22, Vc11a345.31, Vc11s61.32, Vc12a78.41, Vc12a84.45, Vc12p83.4, Vc12s106.30, Vc13a136.41, Vc13a136.42, Vc13a138.30, Vc13a37.37, Vc13p136.9, Vc13p8.4, Vc13s159.19, Vc1452a0.4, Vc14a192.34, Vc14s282.27, Vc14s391.35, Vc15a235.26, Vc15a239.39, Vc15s334.29, Vc15s360.57, Vc16a366.33, Vc17a387.47, Vc17s291.34, Vc17s337.47, Vc19a286.27, Vc1a373.37,…	145	9109	401	52010	0.3616	3.10887e-19	****	3.79088e-17	****	Se vs Sa		GO:0046593	MF
33	GO:0006979	BP	response to oxidative stress	Novel4416, Vc10s394.22, Vc115a1.24, Vc1201p0.0, Vc12p138.6, Vc12s139.44, Vc13a46.32, Vc14s322.43, Vc16s40.47, Vc17a163.18, Vc17a163.19, Vc1a7.44, Vc1s45.29, Vc21a112.20, Vc21a112.21, Vc22p23.13, Vc29a112.21, Vc2a300.28, Vc2a320.20, Vc2a333.29, Vc2s372.43, Vc30a303.29, Vc32a318.21, Vc33a226.20, Vc34a187.19, Vc37a166.16, Vc3a70.37, Vc3a84.40, Vc3p36.24, Vc40a63.31, Vc40a63.32, Vc41s3.38, Vc42a14.30…	40	1861	254	52010	0.1575	4.08955e-15	****	1.84278e-13	****	Ex vs Sa		33	GO:0004864	MF	protein phosphatase inhibitor activity	Vc10a380.40, Vc10a380.41, Vc10a381.28, Vc10a381.30, Vc10a381.33, Vc10s381.47, Vc10s382.22, Vc12a302.25, Vc14p50.7, Vc1a22.33, Vc1a22.34, Vc1a22.44, Vc20a12.22, Vc20a352.37, Vc22p173.7, Vc23a89.30, Vc25a333.26, Vc28a25.27, Vc28s353.84, Vc2p15.3, Vc2s335.35, Vc35a213.33, Vc36a135.32, Vc37a50.40, Vc38a233.21, Vc39a262.37, Vc3a68.25, Vc3p373.5, Vc40a196.22, Vc41a184.24, Vc43p197.5, Vc44a16.23, Vc46p5…	45	7813	61	52010	0.7377	1.30344e-24	****	1.37295e-22	****	Ex vs Se		33	GO:0032440	MF	2-alkenal reductase [NAD(P)+] activity	Vc10a371.19, Vc115p2.20, Vc11p235.2, Vc11p330.36, Vc11s329.75, Vc12a100.16, Vc12a215.16, Vc12a74.32, Vc136a1.27, Vc13a19.18, Vc13a318.39, Vc13s269.25, Vc14a102.30, Vc14a307.32, Vc14a371.36, Vc157a2.45, Vc15a159.14, Vc15a230.28, Vc15a379.27, Vc16a167.15, Vc16a390.30, Vc17a386.27, Vc189s1.41, Vc18a267.24, Vc18a6.28, Vc18s102.25, Vc191a1.55, Vc199p0.5, Vc19s298.17, Vc1a448.48, Vc20a355.33, Vc20a370.…	91	9109	205	52010	0.4439	3.60835e-19	****	4.2666e-17	****	Se vs Sa		GO:0006979	BP
34	GO:0016788	MF	hydrolase activity, acting on ester bonds	Vc10a66.28, Vc11a128.27, Vc11s73.25, Vc149a1.17, Vc17s360.29, Vc19p210.23, Vc1a374.32, Vc22a73.34, Vc22p108.29, Vc24s266.44, Vc24s347.38, Vc32a308.29, Vc33p53.2, Vc34a21.31, Vc38a264.50, Vc38a264.51, Vc42a8.27, Vc43a259.40, Vc44s154.23, Vc4p419.17, Vc5a353.27, Vc6a41.28, Vc6a89.33, Vc6p89.2, Vc8a78.30, Vc9a397.25	26	1861	107	52010	0.243	6.70798e-15	****	2.93376e-13	****	Ex vs Sa		34	GO:0051707	BP	response to other organism	Novel1860, Vc1032p0.1, Vc103a1.29, Vc10a163.27, Vc10p265.7, Vc10p62.13, Vc1177a0.5, Vc12a234.13, Vc12a374.24, Vc1335p0.1, Vc133a2.18, Vc14a102.30, Vc14p37.5, Vc14s37.41, Vc16a237.22, Vc16a357.36, Vc16p172.0, Vc16p5.1, Vc16s358.37, Vc16s59.47, Vc17a145.18, Vc17s136.34, Vc17s147.37, Vc18a338.26, Vc18p346.9, Vc18p379.6, Vc1p428.27, Vc1s428.50, Vc20p282.2, Vc20p283.6, Vc20p283.9, Vc22p126.3, Vc23a246…	91	7813	201	52010	0.4527	1.43353e-24	****	1.46558e-22	****	Ex vs Se		34	GO:0022857	MF	transmembrane transporter activity	Novel0206, Novel2071, Vc10s13.29, Vc10s385.46, Vc114a3.61, Vc115p2.20, Vc12a165.25, Vc12s268.38, Vc13a318.39, Vc13s73.43, Vc13s98.35, Vc14a388.29, Vc15a315.31, Vc15a332.33, Vc16a390.30, Vc16s375.45, Vc17a253.29, Vc17a254.22, Vc17a337.40, Vc17s200.26, Vc18a20.19, Vc18s12.40, Vc19a127.27, Vc19a326.36, Vc19s180.32, Vc19s360.29, Vc1a146.25, Vc1s19.27, Vc20a141.17, Vc20s125.28, Vc20s167.19, Vc20s213.2…	111	9109	279	52010	0.3978	1.41173e-18	****	1.62017e-16	****	Se vs Sa		GO:0016788	MF
35	GO:0009805	BP	coumarin biosynthetic process	Novel0966, Novel2248, Vc11a145.15, Vc11s212.32, Vc11s369.50, Vc15a134.19, Vc15s205.28, Vc1a398.30, Vc20a269.18, Vc22a131.24, Vc24a250.20, Vc29a246.26, Vc2s416.46, Vc33a61.31, Vc33p61.8, Vc3s6.50, Vc43a37.30, Vc43p36.14, Vc46a11.23, Vc46a171.29, Vc46a172.36, Vc5a375.24, Vc5a375.25, Vc8a52.29	24	1861	91	52010	0.2637	9.97582e-15	****	4.2383e-13	****	Ex vs Sa		35	GO:0032440	MF	2-alkenal reductase [NAD(P)+] activity	Vc10a364.26, Vc10a371.19, Vc115p2.20, Vc11p32.6, Vc11p330.36, Vc12a100.16, Vc12a215.16, Vc136a1.27, Vc13a19.18, Vc13a268.27, Vc14a102.30, Vc14a307.32, Vc14p171.3, Vc157a2.45, Vc15a159.14, Vc15a205.25, Vc15a230.28, Vc16a167.15, Vc16a390.30, Vc16p128.2, Vc16s59.49, Vc17a121.22, Vc17a386.27, Vc187a0.30, Vc189s1.41, Vc18a267.24, Vc18a6.28, Vc18s102.25, Vc199p0.5, Vc19a348.55, Vc19s298.17, Vc20p377.3,…	91	7813	205	52010	0.4439	8.12637e-24	****	8.07065e-22	****	Ex vs Se		35	GO:0005509	MF	calcium ion binding	Vc10a198.17, Vc10a198.18, Vc10a323.26, Vc10p388.3, Vc10s265.32, Vc10s4.41, Vc11a281.29, Vc11p331.35, Vc11p379.0, Vc12a350.33, Vc12s284.38, Vc12s3.28, Vc12s44.37, Vc134a2.26, Vc13p40.9, Vc13p70.2, Vc13p70.4, Vc13s37.54, Vc14a309.25, Vc14s185.45, Vc15a158.19, Vc15a265.33, Vc15a315.28, Vc15a315.29, Vc15p371.13, Vc15s91.28, Vc162a2.37, Vc16a323.23, Vc17a169.23, Vc17a320.36, Vc17p169.6, Vc17s6.46, Vc1…	163	9109	478	52010	0.341	1.48252e-18	****	1.6528e-16	****	Se vs Sa		GO:0009805	BP
36	GO:0008061	MF	chitin binding	Vc12a10.30, Vc12a37.34, Vc12p382.8, Vc13a314.25, Vc17a50.20, Vc23s17.40, Vc25a163.31, Vc25a163.32, Vc25a163.34, Vc25a163.35, Vc2a101.19, Vc34a311.28, Vc38p27.7, Vc39p25.5, Vc41a264.29, Vc53a15.52, Vc583a0.14, Vc6a389.35, Vc6p389.6	19	1861	53	52010	0.3585	1.12629e-14	****	4.65219e-13	****	Ex vs Sa		36	GO:0008194	MF	UDP-glycosyltransferase activity	Novel3202, Novel4995, Vc10a113.26, Vc10p159.9, Vc11p337.3, Vc11p356.13, Vc12a74.33, Vc12a74.34, Vc12p300.7, Vc13a19.21, Vc13p70.2, Vc13p70.4, Vc13s19.30, Vc14a326.39, Vc14s307.43, Vc14s354.49, Vc14s6.29, Vc15a348.41, Vc16s325.47, Vc18a76.26, Vc18a76.29, Vc1p272.1, Vc1s317.29, Vc200s1.44, Vc20a45.21, Vc20a47.45, Vc20a68.33, Vc20a68.36, Vc21p238.1, Vc21p49.17, Vc22p189.5, Vc23a338.19, Vc23a338.21, …	86	7813	190	52010	0.4526	2.69439e-23	****	2.60158e-21	****	Ex vs Se		36	GO:0004497	MF	monooxygenase activity	Novel0283, Vc10a348.25, Vc10s168.38, Vc11a240.22, Vc11a345.31, Vc12a78.41, Vc12a84.45, Vc12p83.4, Vc12s106.30, Vc12s239.28, Vc13a136.41, Vc13a136.42, Vc13a138.30, Vc13p136.9, Vc13p8.4, Vc13s159.19, Vc1452a0.4, Vc14a192.34, Vc14s282.27, Vc15a235.26, Vc15a239.39, Vc15s334.29, Vc16a366.33, Vc17a387.47, Vc17s291.34, Vc19a286.27, Vc19a92.24, Vc1a373.37, Vc1a56.30, Vc1s138.31, Vc20a105.12, Vc20s242.26,…	126	9109	336	52010	0.375	2.24599e-18	****	2.4344e-16	****	Se vs Sa		GO:0008061	MF
37	GO:0051762	BP	sesquiterpene biosynthetic process	Vc112a0.32, Vc13a238.27, Vc13p8.4, Vc14s19.34, Vc17a387.47, Vc20s242.26, Vc21a13.24, Vc25s25.33, Vc27a337.39, Vc28p114.1, Vc29a7.44, Vc302a0.32, Vc30a161.25, Vc30p264.5, Vc32a159.26, Vc33p307.8, Vc37s189.25, Vc3a410.20, Vc41s56.46, Vc42a154.36, Vc42p53.1, Vc44p116.20	22	1861	76	52010	0.2895	1.52593e-14	****	6.13259e-13	****	Ex vs Sa		37	GO:0009738	BP	abscisic acid-activated signaling pathway	Vc10a224.19, Vc10a380.40, Vc10a380.41, Vc10a381.28, Vc10a381.30, Vc10a381.33, Vc10s381.47, Vc10s382.22, Vc11a302.17, Vc11p381.11, Vc12a302.25, Vc14a236.21, Vc14a236.26, Vc14p50.7, Vc14s321.47, Vc15a373.26, Vc15s373.36, Vc169a0.20, Vc18a2.21, Vc1a22.33, Vc1a22.34, Vc1a22.44, Vc20a12.22, Vc20a352.37, Vc21a141.31, Vc21p261.1, Vc22p173.7, Vc23a89.30, Vc24s22.40, Vc25s86.24, Vc26a145.26, Vc26p252.4, V…	78	7813	167	52010	0.4671	2.5324e-22	****	2.37909e-20	****	Ex vs Se		37	GO:0043565	MF	sequence-specific DNA binding	Novel1370, Novel2231, Novel2908, Novel2932, Novel4883, Novel5317, Vc105a4.47, Vc108a3.29, Vc10a175.17, Vc10a390.33, Vc10p234.4, Vc11a301.20, Vc11p335.2, Vc11p335.5, Vc11s334.37, Vc12s296.36, Vc13a109.19, Vc13p48.41, Vc13s70.42, Vc14s321.47, Vc15a143.24, Vc15p260.4, Vc15p325.15, Vc15s305.29, Vc15s324.35, Vc1617s0.4, Vc16a230.18, Vc16a318.35, Vc16a61.39, Vc17a172.33, Vc17p14.18, Vc17s284.47, Vc18a1…	155	9109	449	52010	0.3452	2.82522e-18	****	2.97946e-16	****	Se vs Sa		GO:0051762	BP
38	GO:0010427	MF	abscisic acid binding	Vc10a380.40, Vc10a381.28, Vc10a381.30, Vc10a381.33, Vc10s381.47, Vc1a22.33, Vc1a22.34, Vc1a22.44, Vc35a213.33, Vc36a135.32, Vc4a307.29, Vc5a19.35, Vc5a19.38, Vc5a20.29, Vc8a391.32, Vc8a392.32, Vc8a393.32, Vc8s393.37, Vc9a281.33	19	1861	54	52010	0.3519	1.67936e-14	****	6.5716e-13	****	Ex vs Sa		38	GO:0010427	MF	abscisic acid binding	Vc10a380.40, Vc10a380.41, Vc10a381.28, Vc10a381.30, Vc10a381.33, Vc10s381.47, Vc10s382.22, Vc12a302.25, Vc14p50.7, Vc1a22.33, Vc1a22.34, Vc1a22.44, Vc1p420.2, Vc20a12.22, Vc22p173.7, Vc23a89.30, Vc2p15.3, Vc35a213.33, Vc36a135.32, Vc37a50.40, Vc38a233.21, Vc39a262.37, Vc3p373.5, Vc40a196.22, Vc41a184.24, Vc43p197.5, Vc46p55.10, Vc4a307.29, Vc5a19.35, Vc5a19.38, Vc5a20.29, Vc5p322.8, Vc5s18.47, Vc…	40	7813	54	52010	0.7407	3.8473e-22	****	3.51927e-20	****	Ex vs Se		38	GO:0032259	BP	methylation	Novel3475, Novel4100, Vc10a110.29, Vc10a23.16, Vc10a323.26, Vc10a371.17, Vc1144s0.6, Vc114a0.28, Vc11a205.22, Vc11a362.45, Vc11a382.34, Vc11a5.14, Vc12a125.27, Vc12a234.16, Vc12a286.31, Vc12p297.0, Vc12p44.1, Vc12s70.66, Vc13s266.40, Vc13s341.30, Vc14a148.27, Vc14a192.34, Vc14a239.15, Vc14a26.25, Vc14a374.18, Vc14a75.33, Vc14a79.29, Vc14s384.49, Vc15a17.25, Vc15a199.24, Vc15a354.40, Vc15p117.19, …	224	9109	738	52010	0.3035	6.28749e-18	****	6.45626e-16	****	Se vs Sa		GO:0010427	MF
39	GO:0030246	MF	carbohydrate binding	Novel3475, Vc103a1.29, Vc126s3.69, Vc133a2.18, Vc14a255.30, Vc14a377.25, Vc14s334.52, Vc17a56.35, Vc17a56.37, Vc17a80.35, Vc17s56.40, Vc17s56.41, Vc18p147.5, Vc1a257.20, Vc1a430.38, Vc1p428.27, Vc20a353.15, Vc21a8.22, Vc22p126.3, Vc24s205.89, Vc28a24.25, Vc28a32.43, Vc29a3.21, Vc29s151.27, Vc2a301.24, Vc2a431.29, Vc2s50.28, Vc33a312.24, Vc34a311.28, Vc35a94.33, Vc37a235.39, Vc38a231.28, Vc39p60.2…	41	1861	281	52010	0.1459	2.69071e-14	****	1.02592e-12	****	Ex vs Sa		39	GO:0016887	MF	ATP hydrolysis activity	Novel2556, Novel4811, Vc1081a0.8, Vc10a163.27, Vc10a163.29, Vc10a371.19, Vc10p144.11, Vc10p62.13, Vc11a361.31, Vc11a54.15, Vc11p330.36, Vc11p387.2, Vc11s359.47, Vc1269a0.3, Vc12a40.49, Vc12a51.41, Vc12s7.46, Vc136a1.27, Vc13a239.16, Vc13a83.25, Vc13s285.50, Vc13s92.35, Vc14a264.33, Vc14a307.32, Vc14p326.33, Vc1541a0.2, Vc157a2.45, Vc15a354.37, Vc15a61.19, Vc15s352.37, Vc1659s0.4, Vc16a230.18, Vc1…	249	7813	931	52010	0.2675	8.82926e-21	****	7.86936e-19	****	Ex vs Se		39	GO:0005739	CC	mitochondrion	Novel0125, Novel0855, Vc1006a0.7, Vc106s4.53, Vc10a119.40, Vc10a317.24, Vc10a336.34, Vc10a375.26, Vc10a60.47, Vc10a66.27, Vc10s366.34, Vc10s377.34, Vc10s91.35, Vc11a205.22, Vc11a216.25, Vc11a232.28, Vc11a345.35, Vc11a364.40, Vc11s332.29, Vc11s378.35, Vc11s82.34, Vc121p2.5, Vc12a240.21, Vc12a255.24, Vc12a381.27, Vc12a50.33, Vc12s241.17, Vc12s360.40, Vc12s78.54, Vc130a1.39, Vc13a332.32, Vc13a381.39…	301	9109	1077	52010	0.2795	7.62805e-18	****	7.63197e-16	****	Se vs Sa		GO:0030246	MF
40	GO:0005886	CC	plasma membrane	Vc10a332.45, Vc10a364.26, Vc115a1.24, Vc11a222.34, Vc11a269.29, Vc11a285.25, Vc11a326.29, Vc11s93.30, Vc12a107.49, Vc138a2.27, Vc13a104.25, Vc13p284.3, Vc14p171.3, Vc14p357.28, Vc15a150.19, Vc15a216.27, Vc15a255.20, Vc15a269.38, Vc15a94.18, Vc15p377.23, Vc15s195.35, Vc17a37.38, Vc17a56.35, Vc17s56.41, Vc19a268.36, Vc19a301.22, Vc19a317.42, Vc1a430.38, Vc20a352.37, Vc21a136.38, Vc21a65.51, Vc22a2.…	96	1861	1164	52010	0.0825	4.95163e-14	****	1.84077e-12	****	Ex vs Sa		40	GO:0009535	CC	chloroplast thylakoid membrane	Vc10a174.12, Vc10a40.33, Vc10a52.41, Vc10p343.0, Vc11a238.26, Vc11a360.27, Vc11p117.3, Vc11p371.17, Vc12a356.30, Vc13a69.40, Vc14s167.34, Vc14s185.45, Vc14s323.44, Vc15a205.25, Vc15a364.29, Vc15s113.27, Vc17a112.27, Vc17a55.28, Vc17a80.31, Vc19a356.32, Vc19p195.7, Vc19p374.13, Vc1a258.34, Vc1a388.23, Vc1p398.3, Vc1p460.22, Vc1p68.5, Vc207p1.1, Vc22s341.41, Vc23a38.33, Vc24a31.44, Vc24a41.40, Vc24…	75	7813	165	52010	0.4545	1.20096e-20	****	1.04363e-18	****	Ex vs Se		40	GO:0006457	BP	protein folding	Vc1081a0.8, Vc11p324.1, Vc11p330.36, Vc11s329.68, Vc11s329.75, Vc12a270.28, Vc136a1.27, Vc13a131.20, Vc14a283.32, Vc14a307.32, Vc14a325.38, Vc14s249.38, Vc14s276.42, Vc14s362.36, Vc157a2.45, Vc159a2.43, Vc15p320.2, Vc15p329.2, Vc15s330.54, Vc16a288.25, Vc16p293.20, Vc16s182.34, Vc17a169.23, Vc17a341.47, Vc17p169.6, Vc17s144.15, Vc17s352.51, Vc18s120.45, Vc199p0.5, Vc19a363.26, Vc19p357.13, Vc19s3…	156	9109	459	52010	0.3399	1.13043e-17	****	1.10273e-15	****	Se vs Sa		GO:0005886	CC
41	GO:0005773	CC	vacuole	Novel0044, Vc11p246.8, Vc126s3.69, Vc12a10.30, Vc12a37.34, Vc13a314.25, Vc13a36.41, Vc14a377.25, Vc15p243.0, Vc16a182.29, Vc19p289.3, Vc21a112.20, Vc21a112.21, Vc21a8.22, Vc25a163.31, Vc25a163.32, Vc25a163.34, Vc25a163.35, Vc26s184.18, Vc29a112.21, Vc29a3.21, Vc2a431.29, Vc31a93.28, Vc32a329.32, Vc32a329.33, Vc33a226.20, Vc33a312.24, Vc36s159.21, Vc37a105.23, Vc38s175.32, Vc42a102.21, Vc42a25.30,…	37	1861	239	52010	0.1548	7.44997e-14	****	2.70198e-12	****	Ex vs Sa		41	GO:0006099	BP	tricarboxylic acid cycle	Vc10a105.22, Vc10a30.27, Vc10a387.25, Vc10a60.47, Vc11a364.40, Vc12a381.27, Vc13a59.47, Vc14a221.28, Vc14a289.25, Vc17a93.20, Vc17p79.24, Vc1a16.36, Vc1a368.30, Vc1p328.2, Vc21a198.32, Vc22a47.36, Vc23a40.20, Vc25a269.25, Vc25a332.27, Vc26a195.28, Vc27a54.30, Vc27p23.19, Vc2a334.29, Vc2s257.32, Vc32a305.29, Vc33a156.18, Vc34a300.23, Vc34p269.11, Vc35a277.30, Vc35s201.18, Vc35s22.36, Vc36a260.22, …	67	7813	138	52010	0.4855	1.54416e-20	****	1.30914e-18	****	Ex vs Se		41	GO:1902600	BP	proton transmembrane transport	Novel4776, Vc10a226.28, Vc11a167.32, Vc11a306.34, Vc11a318.29, Vc11s112.24, Vc124a3.48, Vc126a0.20, Vc12a59.41, Vc138a0.21, Vc13p47.9, Vc13s269.25, Vc13s282.38, Vc14a264.33, Vc15a107.18, Vc16a207.28, Vc16a256.16, Vc17a169.23, Vc17a313.23, Vc17p362.19, Vc17s16.50, Vc18a146.17, Vc19a235.34, Vc19a337.40, Vc1a44.30, Vc20p289.2, Vc22a290.27, Vc22s25.18, Vc22s266.34, Vc236a0.56, Vc23a106.24, Vc23a351.3…	106	9109	268	52010	0.3955	1.35471e-17	****	1.28929e-15	****	Se vs Sa		GO:0005773	CC
42	GO:0045552	MF	dihydrokaempferol 4-reductase activity	Vc13a67.37, Vc13p166.8, Vc14a46.20, Vc25a44.25, Vc2a63.19, Vc30a208.37, Vc30a338.22, Vc32a297.40, Vc32p199.0, Vc32s99.39, Vc3a382.28	11	1861	15	52010	0.7333	1.43024e-13	****	5.06372e-12	****	Ex vs Sa		42	GO:0009723	BP	response to ethylene	Novel0961, Vc10a375.26, Vc10a60.47, Vc1139p0.1, Vc11a145.15, Vc12a134.24, Vc132a3.31, Vc13a115.23, Vc13s302.30, Vc148s2.69, Vc14a356.53, Vc14a56.20, Vc14p357.28, Vc14s356.75, Vc14s57.22, Vc14s57.24, Vc15a134.19, Vc16a144.17, Vc16a95.34, Vc16s224.37, Vc17p329.4, Vc17p332.40, Vc17p61.0, Vc18a258.26, Vc18a312.31, Vc18s180.19, Vc1a368.30, Vc20a121.20, Vc21p54.4, Vc22a160.31, Vc22s52.23, Vc23a277.24, …	75	7813	167	52010	0.4491	2.89491e-20	****	2.39588e-18	****	Ex vs Se		42	GO:0000981	MF	DNA-binding transcription factor activity, RNA polymerase II-specific	Vc108a3.29, Vc10a199.19, Vc11a110.26, Vc11a199.24, Vc126a3.49, Vc12s361.42, Vc13a109.19, Vc13s70.42, Vc14a376.24, Vc14p42.4, Vc153a0.21, Vc15a106.16, Vc15a192.30, Vc16s224.37, Vc17a20.19, Vc17s167.20, Vc17s186.26, Vc17s59.28, Vc18p360.20, Vc18s180.19, Vc19a265.20, Vc19s85.42, Vc1a209.13, Vc20a297.24, Vc20s89.36, Vc21s65.59, Vc22a155.20, Vc22a156.19, Vc22a27.16, Vc22s130.28, Vc23a291.17, Vc23p326.…	81	9109	182	52010	0.4451	2.58718e-17	****	2.40361e-15	****	Se vs Sa		GO:0045552	MF
43	GO:0016125	BP	sterol metabolic process	Vc10a192.35, Vc12a323.22, Vc14p365.2, Vc14s19.34, Vc1a241.25, Vc23a68.32, Vc23a68.33, Vc25s25.33, Vc26s130.36, Vc29s127.41, Vc33s210.34, Vc35p310.18, Vc37s189.25, Vc3a410.20, Vc40a218.18, Vc40p218.4, Vc41a202.31, Vc41a203.19, Vc5a190.17, Vc7a342.29, Vc8a205.30	21	1861	80	52010	0.2625	5.06622e-13	****	1.75197e-11	****	Ex vs Sa		43	GO:0015979	BP	photosynthesis	Vc10a139.26, Vc10a174.12, Vc10a262.17, Vc10p343.0, Vc11a224.39, Vc11a238.26, Vc11a259.34, Vc11a269.31, Vc11a360.27, Vc11p371.17, Vc14s185.45, Vc15a364.29, Vc15s330.54, Vc17a112.27, Vc19a283.11, Vc19a295.42, Vc19a37.38, Vc19p374.13, Vc1a258.34, Vc1a291.25, Vc1p328.2, Vc1p460.22, Vc1p68.5, Vc207p1.1, Vc20a37.42, Vc214s0.37, Vc21a331.44, Vc22a290.27, Vc22s341.41, Vc24a130.34, Vc24a155.28, Vc24a31.44…	69	7813	147	52010	0.4694	4.50357e-20	****	3.64056e-18	****	Ex vs Se		43	GO:0004553	MF	hydrolase activity, hydrolyzing O-glycosyl compounds	Vc10s13.30, Vc10s4.44, Vc11p335.2, Vc11p335.5, Vc11p90.11, Vc11s334.37, Vc11s398.32, Vc12a38.26, Vc12a9.25, Vc12p12.12, Vc14a255.30, Vc14s22.27, Vc14s83.18, Vc1584a0.5, Vc15a97.35, Vc15s234.41, Vc15s324.35, Vc17s224.18, Vc17s290.36, Vc19a182.29, Vc19a26.20, Vc1s432.37, Vc1s442.37, Vc20a157.23, Vc221p1.6, Vc22a67.34, Vc23a93.31, Vc24s121.39, Vc25a6.29, Vc25s28.29, Vc28a165.20, Vc28p330.2, Vc29a221…	79	9109	177	52010	0.4463	5.18168e-17	****	4.70208e-15	****	Se vs Sa		GO:0016125	BP
44	GO:0005811	CC	lipid droplet	Vc12a304.18, Vc17a308.27, Vc20s210.31, Vc21p224.11, Vc23a53.48, Vc23s53.56, Vc23s87.18, Vc27a274.28, Vc28s139.28, Vc29s213.42, Vc33a131.36, Vc40s217.49, Vc41a187.32, Vc41s186.31, Vc44a146.31, Vc50a6.32, Vc50p7.9	17	1861	49	52010	0.3469	5.26733e-13	****	1.78012e-11	****	Ex vs Sa		44	GO:0030246	MF	carbohydrate binding	Novel2630, Novel4981, Novel5261, Novel5484, Vc103a1.29, Vc1150p0.6, Vc11a305.23, Vc126s3.69, Vc12a99.17, Vc133a2.18, Vc13a355.23, Vc13s77.45, Vc13s83.32, Vc14a377.25, Vc14p124.11, Vc14s334.52, Vc16s225.46, Vc17a169.23, Vc17a383.21, Vc17a56.35, Vc17a56.37, Vc17p169.6, Vc17s56.40, Vc17s56.41, Vc18p147.5, Vc1a430.38, Vc1p428.27, Vc20p343.1, Vc21a8.22, Vc21a85.21, Vc21p27.11, Vc22a263.37, Vc22p126.3,…	104	7813	281	52010	0.3701	1.02529e-19	****	8.09978e-18	****	Ex vs Se		44	GO:0038023	MF	signaling receptor activity	Vc10a381.33, Vc10s381.47, Vc10s382.22, Vc10s48.32, Vc1233s0.10, Vc1249a0.3, Vc12a302.25, Vc12a376.30, Vc13p108.1, Vc13p7.3, Vc14a133.25, Vc14p50.7, Vc16a127.36, Vc18a267.24, Vc20a355.33, Vc22p173.7, Vc23a58.37, Vc23a89.30, Vc23p24.1, Vc25s232.25, Vc28a23.21, Vc28s142.27, Vc2a81.15, Vc2p15.3, Vc30p263.5, Vc31a38.18, Vc32a261.26, Vc32a268.24, Vc35a262.27, Vc36a224.35, Vc36a235.33, Vc37a26.30, Vc37a…	64	9109	129	52010	0.4961	7.44694e-17	****	6.507e-15	****	Se vs Sa		GO:0005811	CC
45	GO:0048046	CC	apoplast	Vc11a245.14, Vc11p17.1, Vc126s3.69, Vc14a278.15, Vc14a377.25, Vc14p326.5, Vc1584a0.5, Vc17p117.7, Vc17s19.29, Vc19s291.30, Vc22a67.34, Vc23p303.0, Vc24a143.44, Vc27p80.5, Vc29p159.19, Vc2a101.19, Vc33p256.7, Vc34p235.3, Vc35a208.17, Vc35p216.5, Vc37a35.39, Vc38s2.56, Vc38s242.14, Vc38s286.29, Vc3s79.31, Vc40p38.6, Vc41p30.3, Vc45p76.7, Vc52a15.38, Vc6a253.9, Vc6s112.26	31	1861	189	52010	0.164	1.60344e-12	****	5.29847e-11	****	Ex vs Sa		45	GO:0009755	BP	hormone-mediated signaling pathway	Novel0103, Novel0763, Vc1032p0.1, Vc10a364.26, Vc1233s0.10, Vc1249a0.3, Vc12a107.49, Vc13p108.1, Vc14p171.3, Vc14p381.8, Vc15a382.31, Vc16a127.36, Vc16p128.2, Vc18a267.24, Vc1a323.25, Vc21a306.25, Vc21a85.21, Vc22a36.36, Vc23a305.41, Vc23p24.1, Vc26s82.33, Vc28s142.27, Vc29a84.20, Vc2a176.15, Vc2a318.34, Vc2p434.8, Vc31a38.18, Vc31a38.20, Vc33a254.25, Vc33a286.31, Vc34p141.22, Vc35a262.27, Vc36a2…	50	7813	88	52010	0.5682	1.71495e-19	****	1.32471e-17	****	Ex vs Se		45	GO:0009653	BP	anatomical structure morphogenesis	Vc11a314.24, Vc13a314.21, Vc13s178.29, Vc15s301.23, Vc16p65.2, Vc17a52.13, Vc18a331.22, Vc19a32.35, Vc19p32.2, Vc19p50.5, Vc19s32.42, Vc19s372.36, Vc1a344.38, Vc20a33.37, Vc20a50.33, Vc20p54.3, Vc24p60.4, Vc26a108.32, Vc27a32.20, Vc28a303.45, Vc28a324.47, Vc28a324.50, Vc29a109.28, Vc30p83.11, Vc32a192.34, Vc33a230.29, Vc34s309.25, Vc36a149.25, Vc36a154.20, Vc42a212.24, Vc4a299.25, Vc7a359.21, Vc8…	34	9109	46	52010	0.7391	7.50423e-17	****	6.507e-15	****	Se vs Sa		GO:0048046	CC
46	GO:0006032	BP	chitin catabolic process	Vc12a10.30, Vc12a37.34, Vc12p382.8, Vc13a314.25, Vc23s17.40, Vc25a163.31, Vc25a163.32, Vc25a163.34, Vc25a163.35, Vc2a101.19, Vc39p25.5, Vc41a264.29, Vc53a15.52, Vc583a0.14, Vc6a389.35, Vc6p389.6	16	1861	45	52010	0.3556	1.64044e-12	****	5.30289e-11	****	Ex vs Sa		46	GO:0009416	BP	response to light stimulus	Novel0883, Novel4490, Vc10a40.33, Vc10a52.41, Vc10p331.23, Vc11p117.3, Vc1260a0.2, Vc13p97.14, Vc14a256.29, Vc14s167.34, Vc14s323.44, Vc15a146.25, Vc15s113.27, Vc15s362.39, Vc16s224.37, Vc17a317.37, Vc17a80.31, Vc17s301.30, Vc18s180.19, Vc19a237.25, Vc19p195.7, Vc19s130.30, Vc1a388.23, Vc20a297.24, Vc20a60.39, Vc20p93.7, Vc21s80.35, Vc22a31.32, Vc24p288.4, Vc25s185.32, Vc26a29.43, Vc27a283.20, Vc…	68	7813	147	52010	0.4626	2.25562e-19	****	1.70446e-17	****	Ex vs Se		46	GO:0071555	BP	cell wall organization	Vc10a45.26, Vc112p1.10, Vc11p371.17, Vc120a0.27, Vc12a156.27, Vc13s83.33, Vc14s182.20, Vc1584a0.5, Vc15a364.29, Vc16a218.19, Vc16a350.21, Vc16a91.22, Vc16a93.25, Vc18a187.21, Vc18a235.12, Vc18a303.45, Vc18a46.32, Vc19p374.13, Vc1a397.31, Vc20a157.23, Vc20a234.17, Vc22a108.31, Vc22a67.34, Vc23a339.27, Vc23s164.30, Vc24a31.44, Vc253a0.51, Vc27a117.22, Vc27a306.43, Vc28a121.28, Vc28a165.20, Vc28a24.…	84	9109	196	52010	0.4286	1.09421e-16	****	9.28176e-15	****	Se vs Sa		GO:0006032	BP
47	GO:0009753	BP	response to jasmonic acid	Novel2248, Novel4416, Vc13a46.32, Vc17p323.0, Vc17s219.15, Vc22a131.24, Vc22a341.40, Vc259a0.49, Vc27p200.0, Vc27p288.0, Vc30a303.29, Vc32a318.21, Vc34p57.9, Vc35p216.5, Vc41a187.32, Vc42a14.30, Vc43a31.37, Vc45a200.22, Vc46a11.23, Vc50p21.6	20	1861	76	52010	0.2632	1.71751e-12	****	5.43389e-11	****	Ex vs Sa		47	GO:0016114	BP	terpenoid biosynthetic process	Novel4995, Vc10a113.26, Vc10a192.35, Vc12a323.22, Vc13p70.4, Vc14a326.39, Vc1a241.25, Vc1s317.29, Vc1s46.41, Vc20a68.33, Vc211a0.22, Vc21a13.24, Vc22a301.32, Vc22a304.29, Vc23a68.32, Vc23a68.33, Vc26p234.1, Vc26s130.36, Vc28a290.34, Vc29a7.44, Vc29s127.41, Vc302a0.32, Vc33p307.8, Vc33s210.34, Vc35s263.41, Vc36a83.20, Vc40a218.18, Vc40p218.4, Vc41a202.24, Vc41a202.31, Vc41a203.19, Vc41a59.21, Vc43…	57	7813	111	52010	0.5135	3.60068e-19	****	2.66297e-17	****	Ex vs Se		47	GO:0005372	MF	water transmembrane transporter activity	Vc12a290.24, Vc1334s0.10, Vc13a192.29, Vc14a386.31, Vc17s355.42, Vc19a63.33, Vc20a66.39, Vc21p129.2, Vc225a1.30, Vc23a103.24, Vc26a133.20, Vc27a318.45, Vc28a292.34, Vc28a45.24, Vc2a440.34, Vc32a179.30, Vc33a207.17, Vc34s27.36, Vc40a184.31, Vc41a171.17, Vc41a278.57, Vc43s134.30, Vc47a66.24, Vc48a56.38, Vc54a13.52	25	9109	28	52010	0.8929	2.23121e-16	****	1.85237e-14	****	Se vs Sa		GO:0009753	BP
48	GO:0030638	BP	polyketide metabolic process	Novel3539, Novel4416, Vc25a173.26, Vc2a67.14, Vc35a1.21, Vc3a334.17, Vc4p104.3, Vc9p64.0	8	1861	8	52010	1	2.6483e-12	****	8.20421e-11	****	Ex vs Sa		48	GO:0009651	BP	response to salt stress	Novel1844, Novel4490, Vc102a4.41, Vc10a342.30, Vc1139p0.1, Vc117a2.46, Vc11a339.40, Vc11p381.11, Vc13a49.38, Vc13s70.42, Vc14a287.24, Vc14p261.41, Vc15a373.26, Vc15p329.2, Vc15s373.36, Vc16a144.17, Vc16a95.34, Vc16s191.21, Vc17a163.18, Vc17a163.19, Vc17a341.47, Vc17a79.50, Vc17p92.9, Vc17s233.38, Vc18a258.26, Vc18s236.23, Vc19a57.31, Vc19p357.13, Vc19p46.20, Vc19s349.40, Vc1a20.24, Vc1a69.26, Vc1…	120	7813	353	52010	0.3399	4.87554e-19	****	3.53071e-17	****	Ex vs Se		48	GO:0008270	MF	zinc ion binding	Novel0042, Novel0180, Novel0398, Novel1029, Novel1972, Novel2065, Novel2381, Novel3156, Novel3431, Novel4239, Novel4791, Novel4883, Novel4917, Novel5165, Novel5317, Novel5327, Vc105a4.47, Vc10a107.27, Vc10a39.35, Vc10s119.52, Vc10s181.38, Vc10s317.26, Vc113p3.2, Vc11a176.30, Vc11a224.39, Vc11a282.19, Vc11a301.20, Vc11a307.34, Vc11a354.42, Vc11a362.45, Vc11a382.39, Vc11p293.2, Vc11s19.22, Vc11s383…	337	9109	1269	52010	0.2656	2.9032e-16	****	2.36006e-14	****	Se vs Sa		GO:0030638	BP
49	GO:0016104	BP	triterpenoid biosynthetic process	Vc12a304.18, Vc20s210.31, Vc21p224.11, Vc23s87.18, Vc28s139.28, Vc29s213.42, Vc33a131.36, Vc40s217.49, Vc41a187.32, Vc41s186.31, Vc44a146.31	11	1861	18	52010	0.6111	3.01911e-12	****	9.16208e-11	****	Ex vs Sa		49	GO:0022857	MF	transmembrane transporter activity	Vc10s13.29, Vc10s385.46, Vc114a3.61, Vc115p2.20, Vc14a192.36, Vc14a388.29, Vc15a315.31, Vc15p19.6, Vc16a390.30, Vc16s375.45, Vc17a253.28, Vc17a253.29, Vc17a254.22, Vc17a337.40, Vc17s200.26, Vc18a20.19, Vc18a357.41, Vc18a357.43, Vc18s12.40, Vc19a127.27, Vc19a326.36, Vc19s180.32, Vc19s360.29, Vc1s19.27, Vc20a141.17, Vc20s125.28, Vc21a188.12, Vc21a22.26, Vc21a258.35, Vc21a305.40, Vc21s304.22, Vc228a…	102	7813	279	52010	0.3656	6.3343e-19	****	4.41211e-17	****	Ex vs Se		49	GO:0006950	BP	response to stress	Vc10a373.31, Vc10s265.32, Vc11p330.36, Vc11p339.5, Vc11s329.68, Vc136a1.27, Vc13a176.20, Vc14a307.32, Vc14a377.33, Vc14s276.42, Vc157a2.45, Vc15p320.2, Vc16a323.23, Vc16p293.20, Vc16s45.51, Vc17p255.7, Vc18s75.37, Vc191a1.55, Vc199p0.5, Vc19a15.40, Vc19s348.58, Vc1s30.39, Vc20a42.41, Vc20s210.34, Vc21a152.24, Vc21p32.0, Vc22p2.1, Vc22p59.6, Vc24a84.33, Vc25a357.28, Vc25s319.44, Vc26a155.35, Vc26p…	77	9109	175	52010	0.44	3.40612e-16	****	2.71238e-14	****	Se vs Sa		GO:0016104	BP
50	GO:0050832	BP	defense response to fungus	Vc10a364.26, Vc10p363.8, Vc12a107.49, Vc13p284.3, Vc14a133.25, Vc14p171.3, Vc15a333.29, Vc1a323.25, Vc20a32.24, Vc21a306.25, Vc22p82.4, Vc22s268.28, Vc23a305.41, Vc23s17.40, Vc24a57.30, Vc25s232.25, Vc26a299.24, Vc27a84.18, Vc28a23.21, Vc29s336.30, Vc2a176.15, Vc2a318.34, Vc2s393.39, Vc33a286.31, Vc33p17.8, Vc34a17.21, Vc35p216.5, Vc36a230.31, Vc36a235.33, Vc38a176.34, Vc3a426.20, Vc40a54.33, Vc4…	44	1861	378	52010	0.1164	9.04484e-12	****	2.68994e-10	****	Ex vs Sa		50	GO:0016829	MF	lyase activity	Vc10a387.25, Vc10a387.31, Vc10s4.44, Vc11a350.27, Vc11a364.40, Vc11s221.30, Vc12a125.27, Vc12p239.1, Vc14a221.28, Vc14a239.15, Vc14a256.29, Vc14a289.25, Vc16a328.28, Vc16p5.1, Vc16s380.31, Vc17a330.31, Vc17a343.51, Vc17s319.45, Vc17s367.32, Vc18p379.6, Vc18s16.42, Vc1a16.36, Vc1s442.37, Vc20a10.35, Vc20a352.37, Vc20s122.39, Vc21a51.39, Vc21a71.25, Vc21p224.11, Vc21s208.21, Vc23a252.31, Vc23s289.2…	101	7813	275	52010	0.3673	6.44692e-19	****	4.41211e-17	****	Ex vs Se		50	GO:0005856	CC	cytoskeleton	Vc10a2.36, Vc10a316.34, Vc13p390.6, Vc14a16.19, Vc14a4.17, Vc14s233.25, Vc150s1.41, Vc16a218.19, Vc17s268.41, Vc188a1.58, Vc18a187.21, Vc19a52.38, Vc19a52.39, Vc1a444.28, Vc20a161.24, Vc21a65.51, Vc21s344.21, Vc22s276.21, Vc25a15.18, Vc26a2.30, Vc26a273.29, Vc26s336.36, Vc27s245.38, Vc27s47.35, Vc28a163.24, Vc28p302.4, Vc28s302.51, Vc29a151.23, Vc29a67.26, Vc29s321.16, Vc2s267.49, Vc30s65.31, Vc3…	61	9109	123	52010	0.4959	3.99236e-16	****	3.11564e-14	****	Se vs Sa		GO:0050832	BP
51	GO:0160062	BP	cutin-based cuticle development	Novel3206, Vc12a290.25, Vc21p54.4, Vc22a19.24, Vc23s103.32, Vc26a56.34, Vc27a30.24, Vc29a55.29, Vc33a280.28, Vc34s260.51, Vc40a184.32, Vc41a171.18	12	1861	25	52010	0.48	1.43499e-11	****	4.18398e-10	****	Ex vs Sa		51	GO:0006629	BP	lipid metabolic process	Novel1225, Vc10a128.22, Vc10a131.14, Vc10a387.25, Vc10s131.20, Vc10s186.25, Vc11p255.8, Vc12a116.38, Vc12s48.26, Vc149a1.17, Vc14a289.25, Vc14p384.7, Vc14p384.8, Vc14s111.28, Vc15a58.22, Vc16s83.25, Vc17a96.18, Vc17s264.49, Vc17s365.24, Vc18s236.23, Vc19a153.16, Vc19a272.32, Vc1a16.36, Vc1a247.15, Vc1a302.27, Vc20a143.30, Vc21a150.23, Vc22a7.22, Vc22p160.2, Vc22s240.29, Vc24a110.27, Vc24a191.24, …	93	7813	243	52010	0.3827	6.47347e-19	****	4.41211e-17	****	Ex vs Se		51	GO:0006508	BP	proteolysis	Novel0132, Novel0180, Novel2156, Novel2971, Novel3162, Novel3465, Novel4039, Novel4239, Novel5415, Vc10s181.40, Vc1127a0.6, Vc114a0.29, Vc119s3.55, Vc11a240.22, Vc11a285.20, Vc11a382.35, Vc11a399.36, Vc11s364.55, Vc1215a0.4, Vc12a100.16, Vc12a143.33, Vc12a394.22, Vc12a40.49, Vc12a60.43, Vc12p86.3, Vc12s331.60, Vc12s332.36, Vc12s7.46, Vc13a102.18, Vc13a118.26, Vc13a282.24, Vc13a68.42, Vc13a83.25, …	265	9109	945	52010	0.2804	4.53547e-16	****	3.47008e-14	****	Se vs Sa		GO:0160062	BP
52	GO:0048544	BP	recognition of pollen	Vc103a1.29, Vc133a2.18, Vc1a430.38, Vc1p428.27, Vc1s428.50, Vc22p126.3, Vc24p205.10, Vc24s205.89, Vc28a32.43, Vc35a94.33, Vc44a24.31, Vc693p0.3, Vc8a22.29, Vc9a138.29	14	1861	37	52010	0.3784	1.51455e-11	****	4.33103e-10	****	Ex vs Sa		52	GO:0004672	MF	protein kinase activity	Novel2630, Novel5165, Vc1032p0.1, Vc10a258.25, Vc10a258.27, Vc10a364.26, Vc10p119.3, Vc10p363.8, Vc11a269.29, Vc11a285.25, Vc11a339.40, Vc11s19.22, Vc11s311.33, Vc11s344.28, Vc1249a0.3, Vc124a0.29, Vc124s1.42, Vc12a107.49, Vc12a131.19, Vc12s42.40, Vc12s44.37, Vc1352a0.6, Vc138a2.27, Vc13a104.25, Vc13a23.31, Vc13p108.1, Vc13s19.28, Vc13s322.18, Vc14s165.36, Vc14s208.35, Vc14s334.52, Vc15a255.20, V…	229	7813	870	52010	0.2632	2.49228e-18	****	1.66599e-16	****	Ex vs Se		52	GO:0012511	CC	monolayer-surrounded lipid storage body	Vc10a149.15, Vc13p215.14, Vc13p64.7, Vc14a174.42, Vc19p29.0, Vc1s138.31, Vc200a0.29, Vc20p29.3, Vc21a334.28, Vc21p97.3, Vc26p95.5, Vc29p96.2, Vc30p185.0, Vc30p343.16, Vc32p166.4, Vc32p301.2, Vc33p241.8, Vc35p269.2, Vc36p57.7, Vc3a222.38, Vc48a87.31, Vc5a126.29, Vc5a261.18, Vc87p0.3, Vc8a164.21, Vc8a283.29, Vc9p352.2	27	9109	33	52010	0.8182	1.32282e-15	****	9.92625e-14	****	Se vs Sa		GO:0048544	BP
53	GO:0120255	BP	olefinic compound biosynthetic process	Novel4416, Vc13a46.32, Vc18s145.24, Vc1p398.3, Vc30a303.29, Vc32a318.21, Vc38s101.15, Vc42a14.30, Vc5p375.4, Vc6a422.25, Vc7a143.23	11	1861	21	52010	0.5238	3.0299e-11	****	8.34345e-10	****	Ex vs Sa		53	GO:0007165	BP	signal transduction	Novel3199, Novel5402, Vc10a208.28, Vc10a68.39, Vc10p119.3, Vc10p322.0, Vc10s399.42, Vc11a253.33, Vc11a315.22, Vc12a131.19, Vc12a374.24, Vc12s239.28, Vc136p3.2, Vc13a112.29, Vc13a45.43, Vc15a302.29, Vc16a136.20, Vc16p293.20, Vc16s328.34, Vc16s59.47, Vc16s74.45, Vc1743a0.5, Vc176s1.80, Vc17a145.18, Vc17a327.28, Vc17a334.31, Vc17a8.24, Vc17p141.9, Vc17p9.0, Vc17s147.37, Vc18a338.26, Vc18a70.33, Vc19…	121	7813	364	52010	0.3324	2.61062e-18	****	1.71217e-16	****	Ex vs Se		53	GO:0009408	BP	response to heat	Vc10p331.23, Vc10s394.22, Vc11a233.23, Vc11a379.21, Vc12a270.28, Vc12p209.5, Vc13a83.25, Vc14a208.25, Vc14a325.38, Vc15a227.19, Vc15a294.29, Vc15p329.2, Vc15s371.27, Vc16a230.18, Vc16p71.20, Vc17a22.22, Vc17a341.47, Vc17p92.9, Vc18a174.24, Vc19p357.13, Vc19s349.40, Vc1a7.44, Vc1p80.9, Vc21a241.21, Vc21p134.1, Vc22s37.47, Vc22s81.47, Vc23a139.21, Vc23a55.25, Vc23p236.2, Vc24a160.31, Vc24p83.21, Vc…	87	9109	214	52010	0.4065	1.48803e-15	****	1.09553e-13	****	Se vs Sa		GO:0120255	BP
54	GO:0005351	MF	carbohydrate:proton symporter activity	Vc13a268.27, Vc13s269.25, Vc30a132.30, Vc32a81.39, Vc37a105.23, Vc38s175.32, Vc42a181.27, Vc42a182.30, Vc42s182.32, Vc613p0.1, Vc6p193.11	11	1861	21	52010	0.5238	3.0299e-11	****	8.34345e-10	****	Ex vs Sa		54	GO:0045548	MF	phenylalanine ammonia-lyase activity	Vc10a222.29, Vc10a222.30, Vc10p225.6, Vc11p299.22, Vc15a283.32, Vc19a331.32, Vc1a185.22, Vc1a186.19, Vc1a187.25, Vc21a13.24, Vc24a101.15, Vc24a58.38, Vc26a180.26, Vc29a173.18, Vc29a7.44, Vc302a0.32, Vc33a169.12, Vc33p307.8, Vc5a235.33, Vc5s236.31, Vc5s236.34, Vc8a235.20, Vc8a235.22, Vc8a236.15	24	7813	26	52010	0.9231	4.03188e-18	****	2.59533e-16	****	Ex vs Se		54	GO:0050832	BP	defense response to fungus	Novel0761, Vc10a365.35, Vc1249a0.3, Vc12a100.16, Vc12a357.34, Vc12p71.16, Vc12s44.37, Vc13a23.31, Vc13p108.1, Vc13p7.3, Vc13p89.2, Vc13s134.35, Vc14a133.25, Vc14a76.19, Vc14a79.31, Vc14p124.11, Vc14p363.21, Vc15a231.23, Vc16a127.36, Vc16a95.34, Vc17a269.36, Vc17a325.31, Vc17a364.31, Vc17p92.9, Vc17s177.25, Vc188a1.57, Vc18a267.24, Vc18p151.13, Vc19s217.22, Vc1s138.31, Vc20a121.20, Vc20a355.33, Vc…	130	9109	378	52010	0.3439	1.9741e-15	****	1.42647e-13	****	Se vs Sa		GO:0005351	MF
55	GO:0072330	BP	monocarboxylic acid biosynthetic process	Vc11p20.10, Vc12s17.27, Vc18s145.24, Vc1p398.3, Vc21a150.23, Vc29a151.24, Vc33a186.25, Vc38s101.15, Vc4a11.38, Vc4a3.28, Vc4p32.6, Vc5p375.4, Vc6a422.25, Vc7a143.23, Vc9s3.42	15	1861	46	52010	0.3261	3.4305e-11	****	9.27484e-10	****	Ex vs Sa		55	GO:0005372	MF	water transmembrane transporter activity	Vc12a290.24, Vc1334s0.10, Vc13a192.29, Vc14a386.31, Vc17s355.42, Vc19a63.33, Vc20a66.39, Vc21p129.2, Vc225a1.30, Vc23a103.24, Vc26a133.20, Vc27a318.45, Vc28a292.34, Vc28a45.24, Vc2a440.34, Vc32a179.30, Vc33a207.17, Vc34s27.36, Vc40a184.31, Vc41a171.17, Vc41a278.57, Vc43s134.30, Vc47a66.24, Vc48a56.38, Vc54a13.52	25	7813	28	52010	0.8929	5.20986e-18	****	3.29263e-16	****	Ex vs Se		55	GO:0007017	BP	microtubule-based process	Vc10a121.22, Vc10a345.26, Vc10s377.34, Vc10s378.40, Vc11a245.18, Vc11a8.21, Vc11p339.11, Vc13a108.11, Vc13a78.32, Vc1426a0.2, Vc15p329.28, Vc16a348.28, Vc16a381.41, Vc17a17.16, Vc17s221.33, Vc18a15.26, Vc18a48.38, Vc1a309.26, Vc20s322.41, Vc24p75.4, Vc30a327.34, Vc31a295.31, Vc31a325.19, Vc32a266.23, Vc32s287.27, Vc34a256.31, Vc34s153.29, Vc35a236.28, Vc35a304.29, Vc43s187.21, Vc44a240.22, Vc45a2…	46	9109	81	52010	0.5679	2.10223e-15	****	1.49144e-13	****	Se vs Sa		GO:0072330	BP
56	GO:0022857	MF	transmembrane transporter activity	Vc13s73.43, Vc14a192.36, Vc15p19.6, Vc16s375.45, Vc17a253.28, Vc17a253.29, Vc18a20.19, Vc20s213.22, Vc21a188.12, Vc21a258.35, Vc228a0.66, Vc22s19.32, Vc22s19.33, Vc26a251.20, Vc26p190.13, Vc27a234.37, Vc27p234.24, Vc29a17.49, Vc29p183.8, Vc2a232.32, Vc30a333.23, Vc31a319.44, Vc32a291.34, Vc33a297.25, Vc33p135.7, Vc33p160.13, Vc33s54.36, Vc34a122.19, Vc35a222.14, Vc39a10.15, Vc39s70.27, Vc43s223.2…	36	1861	279	52010	0.129	3.73127e-11	****	9.90785e-10	****	Ex vs Sa		56	GO:0009737	BP	response to abscisic acid	Novel4490, Vc102a4.41, Vc10a199.19, Vc10a224.21, Vc10a342.30, Vc1139p0.1, Vc11a339.40, Vc12p55.3, Vc14a287.24, Vc14s19.34, Vc15p371.13, Vc163a1.30, Vc16a386.41, Vc16a95.34, Vc17a163.18, Vc17a163.19, Vc17a247.17, Vc17a79.50, Vc18a9.22, Vc199s0.45, Vc1a20.24, Vc1a209.13, Vc1a69.26, Vc1s138.31, Vc20a121.20, Vc20a209.29, Vc21a203.25, Vc21a241.21, Vc21a309.26, Vc21a6.39, Vc21a85.21, Vc21s80.35, Vc22a7…	104	7813	296	52010	0.3514	7.61875e-18	****	4.72906e-16	****	Ex vs Se		56	GO:0046983	MF	protein dimerization activity	Novel2397, Novel2432, Novel3855, Novel4493, Novel5261, Novel5376, Vc102a1.33, Vc10s399.42, Vc11a352.34, Vc11p379.7, Vc12a60.42, Vc13a88.12, Vc13p48.41, Vc13s244.24, Vc13s88.16, Vc14a201.25, Vc14a342.49, Vc14p286.9, Vc14s120.13, Vc153a0.21, Vc15a339.25, Vc15a371.25, Vc1602s0.7, Vc16a8.26, Vc17a255.43, Vc17a313.25, Vc17s157.22, Vc17s166.24, Vc19a381.30, Vc19s108.28, Vc1a337.35, Vc1s1.32, Vc20a5.31,…	121	9109	344	52010	0.3517	2.79715e-15	****	1.94901e-13	****	Se vs Sa		GO:0022857	MF
57	GO:0016621	MF	cinnamoyl-CoA reductase activity	Vc13a67.37, Vc14a46.20, Vc17s293.34, Vc25a44.25, Vc26a16.35, Vc29a16.15, Vc2a63.19, Vc30a338.22, Vc32a297.40, Vc33p299.18, Vc36a33.15, Vc3a382.28, Vc8s149.28	13	1861	33	52010	0.3939	4.43843e-11	****	1.15789e-09	****	Ex vs Sa		57	GO:0006633	BP	fatty acid biosynthetic process	Novel3199, Vc10a342.29, Vc10a361.24, Vc10a7.40, Vc10s322.15, Vc11a53.18, Vc12a255.24, Vc138a0.20, Vc13p97.14, Vc14a212.26, Vc14a256.29, Vc14a372.30, Vc15a60.24, Vc16a319.17, Vc18s82.29, Vc19a155.20, Vc19a57.30, Vc19s12.31, Vc19s130.30, Vc1a439.25, Vc1a44.31, Vc1a90.20, Vc1p68.6, Vc1s301.33, Vc20a127.40, Vc20a60.39, Vc20p283.9, Vc22a77.23, Vc23a360.28, Vc23s342.34, Vc24a329.18, Vc25a245.28, Vc25p2…	79	7813	197	52010	0.401	1.11829e-17	****	6.81962e-16	****	Ex vs Se		57	GO:0016829	MF	lyase activity	Novel1890, Vc10a387.31, Vc10s4.44, Vc11a350.27, Vc11a364.40, Vc11s221.30, Vc12a125.27, Vc12p239.1, Vc14a221.28, Vc14a239.15, Vc14a256.29, Vc14a289.25, Vc14s361.54, Vc169a1.34, Vc16a328.28, Vc16s380.31, Vc17a330.31, Vc17a343.51, Vc17s319.45, Vc17s367.32, Vc18s16.42, Vc1s442.37, Vc20a10.35, Vc20s122.39, Vc21a71.25, Vc21p224.11, Vc21s208.21, Vc23a252.31, Vc23a282.30, Vc23s282.35, Vc23s289.25, Vc24a3…	103	9109	275	52010	0.3745	2.91266e-15	****	1.99389e-13	****	Se vs Sa		GO:0016621	MF
58	GO:0016491	MF	oxidoreductase activity	Novel0044, Novel0854, Vc11a356.35, Vc11p246.8, Vc13a41.36, Vc1466a0.2, Vc14a252.26, Vc14a389.31, Vc14s363.40, Vc15a348.38, Vc15p242.0, Vc15p243.0, Vc17a153.17, Vc17a308.27, Vc19a26.20, Vc19p288.0, Vc19p289.3, Vc20s2.38, Vc22a60.28, Vc22p38.34, Vc22p59.6, Vc22s81.46, Vc24a45.33, Vc24s144.40, Vc27a274.28, Vc27a6.25, Vc27p288.0, Vc28a349.38, Vc29a246.26, Vc2a173.23, Vc2a214.23, Vc2a214.29, Vc2a302.3…	60	1861	656	52010	0.0915	5.05633e-11	****	1.29634e-09	****	Ex vs Sa		58	GO:0006865	BP	amino acid transport	Vc10p196.15, Vc10p40.9, Vc10s385.46, Vc11s371.38, Vc13s57.53, Vc14s344.50, Vc151a0.26, Vc16a1.31, Vc16a1.33, Vc16a348.29, Vc17s292.36, Vc18a335.22, Vc18a382.64, Vc18s48.44, Vc19a43.41, Vc19s180.32, Vc19s65.38, Vc1a403.29, Vc1a459.29, Vc1s19.27, Vc1s459.38, Vc20a141.17, Vc20a346.24, Vc20p35.35, Vc21s304.22, Vc23p356.19, Vc25a211.24, Vc26s296.36, Vc28a208.29, Vc28a321.33, Vc28s28.41, Vc2a200.31, Vc…	58	7813	121	52010	0.4793	1.18935e-17	****	7.12792e-16	****	Ex vs Se		58	GO:0015293	MF	symporter activity	Vc10p196.15, Vc10p291.7, Vc11a167.32, Vc11s371.38, Vc12a215.16, Vc12a336.20, Vc14s344.50, Vc151a0.26, Vc15a159.14, Vc1696a0.2, Vc16a1.33, Vc16a348.29, Vc17s292.36, Vc17s350.31, Vc18a382.64, Vc18s102.25, Vc18s48.44, Vc19a235.34, Vc19a45.34, Vc19p56.29, Vc19s65.38, Vc1a212.15, Vc1p115.0, Vc1s459.38, Vc20s44.62, Vc23a240.13, Vc24s214.30, Vc25a211.24, Vc26a90.32, Vc26s184.18, Vc27a313.28, Vc28a321.33…	66	9109	144	52010	0.4583	3.7143e-15	****	2.49883e-13	****	Se vs Sa		GO:0016491	MF
59	GO:0016135	BP	saponin biosynthetic process	Vc12a323.22, Vc21p224.11, Vc23a68.32, Vc23a68.33, Vc28s139.28, Vc29s213.42, Vc33a131.36, Vc40a218.18, Vc41a202.31, Vc41a203.19	10	1861	17	52010	0.5882	5.19282e-11	****	1.30877e-09	****	Ex vs Sa		59	GO:0009409	BP	response to cold	Novel1893, Vc10a224.21, Vc10a280.34, Vc10a385.43, Vc10a40.33, Vc10p322.0, Vc115p2.20, Vc11a339.40, Vc126p0.2, Vc13p97.14, Vc14a22.24, Vc14a256.29, Vc14a287.24, Vc14p380.8, Vc14s358.42, Vc16a144.17, Vc16a386.41, Vc16a390.30, Vc17a163.18, Vc17a163.19, Vc17a22.22, Vc17s379.45, Vc18a2.24, Vc18a258.26, Vc18a9.22, Vc19s130.30, Vc1p90.7, Vc1s138.31, Vc20a60.39, Vc21a141.31, Vc21a241.21, Vc21a6.39, Vc21p…	95	7813	261	52010	0.364	1.38338e-17	****	8.15023e-16	****	Ex vs Se		59	GO:0006099	BP	tricarboxylic acid cycle	Vc10a105.22, Vc10a30.27, Vc10a60.47, Vc11a364.40, Vc12a381.27, Vc12a89.29, Vc13a59.47, Vc13s159.19, Vc14a221.28, Vc14a289.25, Vc17a93.20, Vc17p79.24, Vc1a187.26, Vc1a368.30, Vc1p328.2, Vc22a47.36, Vc23a40.20, Vc24a38.29, Vc25a269.25, Vc25a332.27, Vc27a54.30, Vc27p23.19, Vc2a334.29, Vc2a393.33, Vc2s257.32, Vc32a305.29, Vc32s204.30, Vc34a300.23, Vc34p269.11, Vc35a277.30, Vc35s22.36, Vc36a260.22, Vc…	64	9109	138	52010	0.4638	4.77819e-15	****	3.16008e-13	****	Se vs Sa		GO:0016135	BP
60	GO:0008083	MF	growth factor activity	Vc13a112.29, Vc16a136.20, Vc21a249.36, Vc23s296.31, Vc29s235.27, Vc31a48.13, Vc33a107.21, Vc33a45.34, Vc7a300.25	9	1861	13	52010	0.6923	5.92327e-11	****	1.445e-09	****	Ex vs Sa		60	GO:0003878	MF	ATP citrate synthase activity	Vc10a387.25, Vc14a221.28, Vc14a289.25, Vc1a16.36, Vc25a269.25, Vc25a332.27, Vc2a334.29, Vc2s257.32, Vc35s201.18, Vc36p156.4, Vc3a178.28, Vc3a69.29, Vc4a11.38, Vc4a3.28, Vc4p32.6, Vc4s297.30, Vc5a14.25, Vc8a398.26, Vc9s266.31, Vc9s3.42	20	7813	20	52010	1	3.35456e-17	****	1.94341e-15	****	Ex vs Se		60	GO:0006833	BP	water transport	Vc12a290.24, Vc1334s0.10, Vc13a192.29, Vc14a386.31, Vc17s355.42, Vc19a63.33, Vc1s315.27, Vc20a66.39, Vc21p129.2, Vc225a1.30, Vc23a103.24, Vc26a133.20, Vc27a318.45, Vc28a292.34, Vc28a45.24, Vc2a440.34, Vc32a179.30, Vc33a207.17, Vc34s27.36, Vc40a184.31, Vc41a171.17, Vc41a278.57, Vc43s134.30, Vc47a66.24, Vc48a56.38, Vc54a13.52	26	9109	32	52010	0.8125	6.2043e-15	****	4.03487e-13	****	Se vs Sa		GO:0008083	MF
61	GO:0009723	BP	response to ethylene	Novel0961, Vc11a145.15, Vc132a3.31, Vc14p357.28, Vc15a134.19, Vc17p329.4, Vc17p332.40, Vc18a312.31, Vc21p54.4, Vc22a160.31, Vc23a277.24, Vc24a250.20, Vc26a56.34, Vc27s291.30, Vc28a260.29, Vc29a55.29, Vc33a280.28, Vc36a175.16, Vc36a227.24, Vc41a187.32, Vc43a208.26, Vc46a41.26, Vc4a121.28, Vc4a276.27, Vc7p22.12, Vc7p347.2, Vc9a77.26	27	1861	167	52010	0.1617	6.03558e-11	****	1.445e-09	****	Ex vs Sa		61	GO:0042542	BP	response to hydrogen peroxide	Novel1844, Vc1139p0.1, Vc148s2.69, Vc14p261.41, Vc15p329.2, Vc16a144.17, Vc16a95.34, Vc17a164.35, Vc17a341.47, Vc18a258.26, Vc19p357.13, Vc19p46.20, Vc19s349.40, Vc20a121.20, Vc21p134.1, Vc24p83.21, Vc25p301.6, Vc26p137.7, Vc27a261.27, Vc27a304.48, Vc27a333.41, Vc28a226.19, Vc29p134.6, Vc29p135.3, Vc31p58.9, Vc32a98.23, Vc35a177.13, Vc35a274.32, Vc35s62.37, Vc36a177.9, Vc36a294.22, Vc3p106.7, Vc4…	46	7813	84	52010	0.5476	3.42915e-17	****	1.95405e-15	****	Ex vs Se		61	GO:0043231	CC	intracellular membrane-bounded organelle	Novel1225, Novel2977, Vc10a249.13, Vc10a34.29, Vc10s227.21, Vc10s317.27, Vc11a301.19, Vc11a388.33, Vc11p324.1, Vc11s19.22, Vc11s231.50, Vc11s276.32, Vc11s329.68, Vc11s364.55, Vc11s364.56, Vc12a123.23, Vc12a234.16, Vc12a40.49, Vc12p109.7, Vc12s329.43, Vc12s7.46, Vc136a1.27, Vc136a3.24, Vc13a239.16, Vc13a83.25, Vc13p40.9, Vc13p66.11, Vc14a373.29, Vc14p162.0, Vc14p175.1, Vc14s361.47, Vc15a317.37, Vc…	209	9109	719	52010	0.2907	1.1527e-14	****	7.37353e-13	****	Se vs Sa		GO:0009723	BP
62	GO:0009738	BP	abscisic acid-activated signaling pathway	Vc10a380.40, Vc10a381.28, Vc10a381.30, Vc10a381.33, Vc10s381.47, Vc15a373.26, Vc15s373.36, Vc1a22.33, Vc1a22.34, Vc1a22.44, Vc20a352.37, Vc28a25.27, Vc35a213.33, Vc36a135.32, Vc38a182.23, Vc44a16.23, Vc49a28.31, Vc4a307.29, Vc5a19.35, Vc5a19.38, Vc5a20.29, Vc7a315.27, Vc8a391.32, Vc8a392.32, Vc8a393.32, Vc8s393.37, Vc9a281.33	27	1861	167	52010	0.1617	6.03558e-11	****	1.445e-09	****	Ex vs Sa		62	GO:0009922	MF	fatty acid elongase activity	Novel3199, Vc10s322.15, Vc11a53.18, Vc13p97.14, Vc14a212.26, Vc14a256.29, Vc14a372.30, Vc15a60.24, Vc19a155.20, Vc19a57.30, Vc19s130.30, Vc1a90.20, Vc20a127.40, Vc20a60.39, Vc23s342.34, Vc24a329.18, Vc25a245.28, Vc25p250.8, Vc269p0.23, Vc28a219.27, Vc28a298.50, Vc28a305.40, Vc2a248.22, Vc2a302.39, Vc2a426.23, Vc3a111.29, Vc3a133.27, Vc48a62.48, Vc5a108.22, Vc64a6.32, Vc794a0.7, Vc8p335.15	32	7813	45	52010	0.7111	4.07944e-17	****	2.26684e-15	****	Ex vs Se		62	GO:0009416	BP	response to light stimulus	Novel4490, Vc10a40.33, Vc10p331.23, Vc10s366.34, Vc11a169.30, Vc1260a0.2, Vc12p209.5, Vc14a256.29, Vc14s323.44, Vc15a146.25, Vc15s113.27, Vc16s224.37, Vc17a317.37, Vc17s301.30, Vc18s180.19, Vc19a237.25, Vc19p195.7, Vc19s305.25, Vc1a388.23, Vc20a269.18, Vc20a297.24, Vc21a303.25, Vc21s80.35, Vc22a31.32, Vc23p236.2, Vc24a127.19, Vc24a227.11, Vc24p288.4, Vc26a29.43, Vc26a296.32, Vc27a283.20, Vc27s268…	66	9109	147	52010	0.449	1.28669e-14	****	8.09788e-13	****	Se vs Sa		GO:0009738	BP
63	GO:0006629	BP	lipid metabolic process	Vc11p20.10, Vc12s17.27, Vc12s48.26, Vc149a1.17, Vc15a58.22, Vc16s83.25, Vc17s264.49, Vc19a153.16, Vc19a272.32, Vc21a150.23, Vc22a109.15, Vc22p160.2, Vc22s240.29, Vc24a326.22, Vc25a249.23, Vc27s241.37, Vc29a151.24, Vc32a282.37, Vc33a186.25, Vc34s112.26, Vc34s112.27, Vc43s144.22, Vc45a10.20, Vc46p41.0, Vc47s54.13, Vc4a11.38, Vc4a3.28, Vc4p32.6, Vc55a12.47, Vc6a34.37, Vc6a41.28, Vc8a8.25, Vc9s3.42	33	1861	243	52010	0.1358	6.12208e-11	****	1.445e-09	****	Ex vs Sa		63	GO:0016787	MF	hydrolase activity	Novel1055, Novel1110, Novel1410, Novel1889, Vc10a198.18, Vc10a224.19, Vc10a260.15, Vc10a325.23, Vc10a331.29, Vc10a385.43, Vc10p252.10, Vc10p338.6, Vc10s317.27, Vc10s349.30, Vc10s38.38, Vc10s80.33, Vc113p3.2, Vc1141a0.6, Vc1176p0.0, Vc117a0.21, Vc117s3.75, Vc11a249.25, Vc11a275.40, Vc11a297.24, Vc11a306.29, Vc11a306.33, Vc11a394.26, Vc11a8.21, Vc11p224.2, Vc11p224.21, Vc120a3.48, Vc126a0.20, Vc12a…	347	7813	1504	52010	0.2307	4.10849e-17	****	2.26684e-15	****	Ex vs Se		63	GO:0045490	BP	pectin catabolic process	Novel5165, Vc10a387.31, Vc11a190.18, Vc11a198.29, Vc13a81.25, Vc14a101.15, Vc17a294.21, Vc17s367.32, Vc20a10.35, Vc22a40.44, Vc26a193.36, Vc273a0.54, Vc27a261.28, Vc27s330.33, Vc28a341.26, Vc29a186.30, Vc2a79.23, Vc30a325.29, Vc32a305.31, Vc33a157.19, Vc34a2.28, Vc34a2.29, Vc34a85.26, Vc34p320.10, Vc35a182.22, Vc36a172.20, Vc3a331.22, Vc48a101.27, Vc4a280.24, Vc873a0.8, Vc9s246.21	31	9109	44	52010	0.7045	1.57295e-14	****	9.74232e-13	****	Se vs Sa		GO:0006629	BP
64	GO:0015293	MF	symporter activity	Vc10a342.30, Vc10p40.9, Vc16a1.31, Vc17s350.31, Vc19a43.41, Vc19a45.34, Vc1a403.29, Vc1a459.29, Vc1a69.26, Vc20s44.62, Vc23p356.19, Vc26s184.18, Vc27a313.28, Vc28a193.16, Vc2a200.31, Vc2a443.35, Vc31s210.37, Vc33s165.33, Vc34s32.27, Vc41a276.28, Vc44a192.19, Vc5a380.28, Vc5a56.26, Vc8a353.26, Vc8p47.19	25	1861	144	52010	0.1736	6.30638e-11	****	1.46525e-09	****	Ex vs Sa		64	GO:0046148	BP	pigment biosynthetic process	Novel3202, Novel4995, Vc10a113.26, Vc11p337.3, Vc12p300.7, Vc13p70.2, Vc13p70.4, Vc14s354.49, Vc14s6.29, Vc1s317.29, Vc200s1.44, Vc20a45.21, Vc20a68.33, Vc21p49.17, Vc22p189.5, Vc23p90.4, Vc26a277.21, Vc26p234.1, Vc28a290.34, Vc29p226.18, Vc2a358.33, Vc2p377.22, Vc32p295.10, Vc32p295.2, Vc36p225.11, Vc37a300.34, Vc39p2.0, Vc3p423.0, Vc40p195.0, Vc40p195.2, Vc40s195.20, Vc46p72.6, Vc46p76.4, Vc48s…	47	7813	88	52010	0.5341	5.92827e-17	****	3.21979e-15	****	Ex vs Se		64	GO:0015297	MF	antiporter activity	Vc11a111.24, Vc11a318.29, Vc11s112.24, Vc13a252.24, Vc13a7.23, Vc13p332.7, Vc146a2.57, Vc14a274.20, Vc14p264.18, Vc14s141.21, Vc14s366.38, Vc15a107.18, Vc16a213.28, Vc16a272.35, Vc18a111.47, Vc19a44.49, Vc20s143.34, Vc21a317.34, Vc22s132.37, Vc22s25.18, Vc23a106.24, Vc23a333.30, Vc23p169.3, Vc23p273.7, Vc23s85.40, Vc24a293.28, Vc24a293.29, Vc24a60.33, Vc25a219.17, Vc25a317.25, Vc26a309.28, Vc27a3…	80	9109	197	52010	0.4061	2.14709e-14	****	1.30905e-12	****	Se vs Sa		GO:0015293	MF
65	GO:0009734	BP	auxin-activated signaling pathway	Vc10a319.37, Vc10p40.9, Vc11a269.29, Vc11a371.31, Vc13a33.40, Vc15a255.20, Vc16a1.31, Vc18s13.55, Vc19a301.22, Vc19a303.28, Vc19a43.41, Vc19a45.34, Vc1a403.29, Vc1a459.29, Vc20s44.62, Vc22a341.40, Vc23p356.19, Vc24a130.35, Vc24a31.42, Vc26s184.18, Vc2a200.31, Vc2a443.35, Vc30a289.21, Vc31a327.26, Vc32s331.35, Vc33s165.33, Vc34a291.26, Vc35a29.25, Vc35s301.39, Vc40p276.4, Vc41a276.28, Vc41s251.35,…	38	1861	317	52010	0.1199	9.76781e-11	****	2.23458e-09	****	Ex vs Sa		65	GO:0009653	BP	anatomical structure morphogenesis	Vc11a314.24, Vc11a333.39, Vc13a314.21, Vc13s178.29, Vc15a323.36, Vc15s301.23, Vc16p65.2, Vc17a52.13, Vc18a331.22, Vc19a32.35, Vc19a351.33, Vc19p32.2, Vc19p50.5, Vc19s32.42, Vc19s372.36, Vc1a344.38, Vc20a33.37, Vc20a50.33, Vc20p54.3, Vc26a108.32, Vc27a32.20, Vc28a303.45, Vc28a324.47, Vc28a324.50, Vc29a109.28, Vc30p83.11, Vc33a230.29, Vc34s309.25, Vc42a212.24, Vc4a299.25, Vc7a359.21, Vc8s111.36	32	7813	46	52010	0.6957	1.14619e-16	****	6.12945e-15	****	Ex vs Se		65	GO:0009507	CC	chloroplast	Novel1893, Vc106a4.43, Vc106s4.53, Vc10a110.25, Vc10a139.26, Vc10a224.21, Vc10a229.25, Vc10a246.22, Vc10a317.24, Vc10a361.24, Vc10s119.52, Vc10s232.19, Vc11a224.39, Vc11a232.28, Vc11a233.23, Vc11a259.34, Vc11a294.25, Vc11p260.30, Vc11p309.17, Vc11s372.31, Vc126p0.2, Vc12a26.21, Vc12a55.21, Vc12a55.22, Vc12a66.22, Vc12a78.41, Vc12p239.1, Vc12s241.17, Vc12s329.48, Vc12s78.54, Vc1380s0.4, Vc13a128.1…	357	9109	1410	52010	0.2532	5.77649e-14	****	3.46767e-12	****	Se vs Sa		GO:0009734	BP
66	GO:0009755	BP	hormone-mediated signaling pathway	Vc10a364.26, Vc12a107.49, Vc14a133.25, Vc14p171.3, Vc1a323.25, Vc21a306.25, Vc23a305.41, Vc25s232.25, Vc28a23.21, Vc2a176.15, Vc2a318.34, Vc33a286.31, Vc36a230.31, Vc36a235.33, Vc38a176.34, Vc3a426.20, Vc6a192.19, Vc7s371.58, Vc8p377.7	19	1861	88	52010	0.2159	2.55586e-10	****	5.75843e-09	****	Ex vs Sa		66	GO:0016125	BP	sterol metabolic process	Vc10a192.35, Vc12a323.22, Vc12a78.41, Vc13a159.12, Vc14p365.2, Vc14s19.34, Vc14s282.27, Vc16a105.25, Vc18s292.31, Vc1a241.25, Vc228p0.6, Vc22a197.17, Vc23a68.32, Vc23a68.33, Vc25s25.33, Vc25s326.40, Vc26s130.36, Vc29s127.41, Vc2s328.40, Vc2s328.42, Vc32a98.23, Vc33s210.34, Vc35s152.31, Vc36s205.35, Vc37s189.25, Vc3a410.20, Vc3p3.14, Vc40a218.18, Vc40p218.4, Vc40s9.40, Vc41a202.31, Vc41a203.19, Vc…	44	7813	80	52010	0.55	1.32926e-16	****	7.00079e-15	****	Ex vs Se		66	GO:0140359	MF	ABC-type transporter activity	Vc10a371.19, Vc11a361.31, Vc1269a0.3, Vc13s86.26, Vc13s92.35, Vc14p326.33, Vc14s46.29, Vc15a354.37, Vc15a379.27, Vc189s1.41, Vc19a116.37, Vc19a156.18, Vc19a298.12, Vc19p318.4, Vc19s298.17, Vc1a32.28, Vc20a115.29, Vc20a343.24, Vc20p342.1, Vc20p342.8, Vc24a114.29, Vc24a40.32, Vc25s44.35, Vc28a239.25, Vc28a32.42, Vc28p32.4, Vc29a266.20, Vc29p262.23, Vc29s266.27, Vc2a377.57, Vc2s62.24, Vc30a321.17, V…	71	9109	169	52010	0.4201	8.1116e-14	****	4.79568e-12	****	Se vs Sa		GO:0009755	BP
67	GO:0006694	BP	steroid biosynthetic process	Vc1102p0.1, Vc13a67.37, Vc14a46.20, Vc17s293.34, Vc22a38.50, Vc25a44.25, Vc26a16.35, Vc29a16.15, Vc2a63.19, Vc30a338.22, Vc32a297.40, Vc33p299.18, Vc36a33.15, Vc3a382.28, Vc526p0.3	15	1861	53	52010	0.283	3.30942e-10	****	7.34493e-09	****	Ex vs Sa		67	GO:0043565	MF	sequence-specific DNA binding	Novel1370, Novel2231, Novel2908, Novel4883, Novel5317, Vc105a4.47, Vc108a3.29, Vc10a117.28, Vc10a175.17, Vc10a68.39, Vc10p234.4, Vc11a207.26, Vc11a301.20, Vc11p335.2, Vc11p335.5, Vc12s296.36, Vc13a109.19, Vc13a154.14, Vc13p48.41, Vc13s70.42, Vc1417p0.0, Vc14p199.7, Vc14s321.47, Vc15a143.24, Vc15a200.28, Vc15a360.46, Vc15p260.4, Vc1617s0.4, Vc16a230.18, Vc17a172.33, Vc17p14.18, Vc17s284.47, Vc17s3…	136	7813	449	52010	0.3029	1.51358e-16	****	7.85252e-15	****	Ex vs Se		67	GO:0009409	BP	response to cold	Novel1893, Vc10a224.21, Vc10a385.43, Vc10a40.33, Vc10p322.0, Vc10s394.22, Vc115p2.20, Vc126p0.2, Vc12p209.5, Vc140a1.34, Vc14a22.24, Vc14a256.29, Vc14a372.28, Vc14p380.8, Vc14s249.38, Vc14s358.42, Vc159a2.43, Vc16a144.17, Vc16a386.41, Vc16a390.30, Vc17a22.22, Vc17s379.45, Vc18a258.26, Vc18a9.22, Vc1a7.44, Vc1s138.31, Vc20s9.44, Vc21a141.31, Vc21a241.21, Vc21a6.39, Vc21p261.1, Vc21s80.35, Vc22s268…	96	9109	261	52010	0.3678	9.03928e-14	****	5.26437e-12	****	Se vs Sa		GO:0006694	BP
68	GO:0009835	BP	fruit ripening	Vc11s212.32, Vc14s19.34, Vc1584a0.5, Vc15s205.28, Vc22a67.34, Vc25s25.33, Vc35a208.17, Vc37a35.39, Vc37s189.25, Vc38s242.14, Vc3a410.20, Vc52a15.38, Vc6s112.26	13	1861	38	52010	0.3421	3.54764e-10	****	7.75786e-09	****	Ex vs Sa		68	GO:0006950	BP	response to stress	Vc10s265.32, Vc1143a0.5, Vc11p330.36, Vc11p339.5, Vc136a1.27, Vc14a307.32, Vc14a377.33, Vc14s276.42, Vc157a2.45, Vc15a205.25, Vc1659s0.4, Vc16p293.20, Vc16s45.51, Vc17p255.7, Vc18s75.37, Vc199p0.5, Vc19a348.55, Vc19s348.58, Vc20s210.34, Vc21a152.24, Vc21p32.0, Vc22a98.36, Vc22a98.41, Vc22p2.1, Vc22p59.6, Vc24a84.33, Vc25a357.28, Vc25s319.44, Vc26a155.35, Vc26p137.16, Vc26p31.5, Vc26s130.36, Vc27p…	71	7813	175	52010	0.4057	2.32356e-16	****	1.18775e-14	****	Ex vs Se		68	GO:0004674	MF	protein serine/threonine kinase activity	Novel5248, Novel5376, Vc10a334.32, Vc10p178.7, Vc10p322.0, Vc10s107.31, Vc10s399.42, Vc10s48.32, Vc1150p0.6, Vc11a315.22, Vc11p310.2, Vc11p322.26, Vc11s400.59, Vc1233s0.10, Vc12a295.21, Vc12a37.30, Vc12a374.24, Vc12p322.7, Vc12s10.41, Vc12s22.28, Vc12s52.45, Vc136p3.2, Vc13a15.39, Vc13a34.33, Vc13p7.3, Vc13s15.44, Vc13s373.29, Vc13s77.45, Vc14a102.30, Vc14p124.11, Vc14p313.4, Vc14p363.21, Vc151a1…	219	9109	779	52010	0.2811	1.18668e-13	****	6.80944e-12	****	Se vs Sa		GO:0009835	BP
69	GO:0031418	MF	L-ascorbic acid binding	Novel0966, Novel2248, Vc11s212.32, Vc11s369.50, Vc13a41.36, Vc15s205.28, Vc1a398.30, Vc20a269.18, Vc22a131.24, Vc2s416.46, Vc30a297.38, Vc32a323.35, Vc33a61.31, Vc33p61.8, Vc42p20.3, Vc43p36.14, Vc46a11.23, Vc46a172.36, Vc5a375.24, Vc5a375.25, Vc8a52.29	21	1861	112	52010	0.1875	4.79856e-10	****	1.03412e-08	****	Ex vs Sa		69	GO:0008422	MF	beta-glucosidase activity	Vc15a315.27, Vc15a315.28, Vc15a315.29, Vc16a93.25, Vc17a223.18, Vc17s123.33, Vc17s140.25, Vc17s360.29, Vc18a303.45, Vc18p273.2, Vc18s72.38, Vc19s360.31, Vc24a72.33, Vc24s73.41, Vc27a205.16, Vc27s105.30, Vc31a4.23, Vc34a21.31, Vc34a229.41, Vc34s209.23, Vc3s48.39, Vc43a98.22, Vc45a102.32, Vc45a205.28, Vc4p419.17, Vc7a332.36, Vc7a89.32, Vc9a397.25	28	7813	37	52010	0.7568	2.60282e-16	****	1.31122e-14	****	Ex vs Se		69	GO:0000325	CC	plant-type vacuole	Novel1996, Vc10a325.24, Vc10s13.29, Vc115p2.20, Vc117a2.46, Vc119s3.55, Vc12a254.22, Vc13p354.9, Vc14a264.33, Vc14a69.29, Vc14s331.53, Vc15a107.18, Vc15a159.14, Vc15a296.30, Vc16a390.30, Vc17a387.48, Vc18s180.20, Vc19a24.38, Vc19a91.43, Vc19s65.38, Vc1s138.31, Vc21a376.27, Vc21a85.21, Vc22a355.22, Vc22s87.36, Vc23a180.38, Vc23p27.5, Vc24a137.28, Vc24s214.30, Vc25a231.21, Vc25p172.0, Vc25p330.6, V…	91	9109	244	52010	0.373	1.54415e-13	****	8.73231e-12	****	Se vs Sa		GO:0031418	MF
70	GO:0046872	MF	metal ion binding	Novel0966, Novel2248, Novel4144, Vc10p43.7, Vc10s232.19, Vc10s265.34, Vc112a3.47, Vc115a1.24, Vc11a245.18, Vc11a332.23, Vc11a356.35, Vc11s212.32, Vc11s329.68, Vc11s369.50, Vc12a345.40, Vc12p138.6, Vc12p375.8, Vc12s139.44, Vc13a282.27, Vc13a41.36, Vc14a22.24, Vc14a365.29, Vc14p329.0, Vc14p5.4, Vc14s322.43, Vc14s363.40, Vc15a348.38, Vc15p320.2, Vc15s205.28, Vc16a348.28, Vc16s290.29, Vc16s40.47, Vc1…	173	1861	3005	52010	0.0576	5.13748e-10	****	1.06291e-08	****	Ex vs Sa		70	GO:0009753	BP	response to jasmonic acid	Novel2248, Novel4416, Novel4490, Vc12a15.23, Vc12a31.26, Vc12s40.56, Vc13a286.23, Vc13a46.32, Vc148s2.69, Vc17p323.0, Vc17s219.15, Vc21a6.39, Vc22a131.24, Vc22a341.40, Vc23a357.24, Vc23p364.3, Vc27p200.0, Vc27p288.0, Vc2a20.21, Vc30a303.29, Vc30s280.35, Vc31s56.26, Vc32a318.21, Vc32a98.23, Vc33a314.24, Vc34p141.22, Vc34p57.9, Vc35a270.26, Vc35p216.5, Vc36a201.19, Vc3a420.19, Vc41a187.32, Vc42a14.…	42	7813	76	52010	0.5526	5.14669e-16	****	2.5557e-14	****	Ex vs Se		70	GO:0006096	BP	glycolytic process	Novel5013, Vc10a209.25, Vc12a138.21, Vc12p71.16, Vc13a332.32, Vc13s219.23, Vc14a185.28, Vc14a382.32, Vc166a2.38, Vc17a3.20, Vc17p11.5, Vc187a1.46, Vc18s382.86, Vc1a199.30, Vc1a201.20, Vc20a376.23, Vc21s80.35, Vc22s170.32, Vc23a347.25, Vc25a279.24, Vc25s256.50, Vc26a1.31, Vc26a153.15, Vc26a78.21, Vc27a2.18, Vc27p10.1, Vc29a151.22, Vc29a80.30, Vc2a226.19, Vc2a245.40, Vc2a267.39, Vc2a436.36, Vc2p433…	69	9109	164	52010	0.4207	1.6536e-13	****	9.21764e-12	****	Se vs Sa		GO:0046872	MF
71	GO:0009059	BP	macromolecule biosynthetic process	Novel3206, Vc12a290.25, Vc21p54.4, Vc22a19.24, Vc23s103.32, Vc26a56.34, Vc27a30.24, Vc29a55.29, Vc2a101.19, Vc33a280.28, Vc34s260.51, Vc40a184.32, Vc41a171.18	13	1861	39	52010	0.3333	5.14657e-10	****	1.06291e-08	****	Ex vs Sa		71	GO:0008061	MF	chitin binding	Vc12a10.30, Vc12a37.34, Vc12a382.41, Vc12p382.8, Vc17a50.20, Vc23p16.4, Vc23s17.40, Vc25a163.31, Vc25a163.32, Vc25a163.34, Vc25a163.35, Vc30s82.54, Vc32s66.30, Vc34a311.28, Vc35a54.42, Vc36a216.26, Vc38p27.7, Vc38s26.24, Vc38s27.39, Vc39a24.30, Vc39p25.5, Vc39s24.35, Vc41a264.29, Vc41p264.23, Vc42a213.43, Vc53a15.50, Vc53a15.52, Vc583a0.14, Vc6a389.35, Vc6a389.36, Vc6p389.31, Vc6p389.6, Vc6s3.36,…	34	7813	53	52010	0.6415	5.79682e-16	****	2.83799e-14	****	Ex vs Se		71	GO:0005525	MF	GTP binding	Novel2977, Vc105p3.8, Vc10a120.30, Vc10a121.22, Vc10a345.26, Vc10a371.21, Vc10a39.34, Vc10s366.34, Vc10s4.41, Vc11a139.16, Vc11a245.18, Vc11a350.33, Vc11a8.21, Vc11p339.11, Vc11p379.0, Vc11s332.29, Vc11s378.35, Vc12a152.17, Vc12a254.22, Vc12a262.18, Vc12a300.32, Vc12p334.8, Vc130a2.41, Vc130a3.45, Vc131a3.40, Vc132p0.16, Vc13a108.11, Vc13a78.32, Vc147a1.25, Vc14a121.25, Vc14a223.28, Vc14a283.33, …	208	9109	733	52010	0.2838	1.81433e-13	****	9.97117e-12	****	Se vs Sa		GO:0009059	BP
72	GO:0000987	MF	cis-regulatory region sequence-specific DNA binding	Vc1486s0.3, Vc28a145.15, Vc28a197.19, Vc28s279.34, Vc35p253.33, Vc36a113.22, Vc37p88.0, Vc38a193.22, Vc39a214.16, Vc44a153.36, Vc4a330.20, Vc691a0.7, Vc9a307.24	13	1861	39	52010	0.3333	5.14657e-10	****	1.06291e-08	****	Ex vs Sa		72	GO:0033612	MF	receptor serine/threonine kinase binding	Vc12a107.49, Vc13p7.3, Vc14a102.30, Vc151a2.48, Vc17a364.31, Vc21s302.26, Vc23a305.41, Vc25a138.21, Vc27s268.33, Vc29s281.26, Vc2a176.15, Vc2a81.15, Vc2s393.39, Vc30p263.5, Vc35a113.29, Vc35p273.6, Vc36p52.5, Vc372s0.22, Vc39s102.29, Vc3a330.26, Vc40a54.33, Vc42p54.0, Vc4a230.25, Vc4p133.1, Vc5a372.22, Vc8s54.38, Vc9a168.13, Vc9p357.4, Vc9p88.1	29	7813	41	52010	0.7073	1.54699e-15	****	7.4685e-14	****	Ex vs Se		72	GO:0006865	BP	amino acid transport	Vc10p196.15, Vc10s385.46, Vc11s371.38, Vc12a165.25, Vc12s268.38, Vc14s344.50, Vc151a0.26, Vc16a1.33, Vc16a348.29, Vc17s292.36, Vc18a382.64, Vc18s48.44, Vc19a45.34, Vc19s180.32, Vc19s65.38, Vc1a212.15, Vc1s19.27, Vc1s459.38, Vc20a141.17, Vc20a346.24, Vc20s44.62, Vc21s304.22, Vc23s108.36, Vc25a211.24, Vc26s184.18, Vc26s296.36, Vc28a208.29, Vc28a321.33, Vc28s28.41, Vc28s310.46, Vc29s282.27, Vc2a200.…	56	9109	121	52010	0.4628	2.62197e-13	****	1.42096e-11	****	Se vs Sa		GO:0000987	MF
73	GO:0004506	MF	squalene monooxygenase activity	Vc12a120.20, Vc17s219.15, Vc23a292.22, Vc27p200.0, Vc34p156.4, Vc40a48.15, Vc41a21.20, Vc45a200.22	8	1861	12	52010	0.6667	1.15264e-09	****	2.3479e-08	****	Ex vs Sa		73	GO:0045490	BP	pectin catabolic process	Novel5165, Vc10a387.31, Vc11a190.18, Vc11a198.29, Vc13a81.25, Vc14a101.15, Vc17a294.21, Vc17a42.24, Vc17s367.32, Vc20a10.35, Vc22a40.44, Vc26a193.36, Vc27a261.28, Vc27s330.33, Vc29a186.30, Vc2a79.23, Vc30a325.29, Vc32a305.31, Vc33a157.19, Vc34a2.28, Vc34a2.29, Vc34a85.26, Vc34p320.10, Vc35a182.22, Vc36a172.20, Vc3a331.22, Vc48a101.27, Vc4a280.24, Vc873a0.8, Vc9s246.21	30	7813	44	52010	0.6818	2.46162e-15	****	1.17214e-13	****	Ex vs Se		73	GO:0046148	BP	pigment biosynthetic process	Novel4995, Vc10a113.26, Vc10a113.31, Vc12p300.7, Vc13p70.2, Vc13p70.4, Vc14s354.49, Vc14s6.29, Vc1a316.27, Vc1s317.29, Vc200s1.44, Vc20a45.21, Vc21p49.17, Vc22p189.5, Vc23a248.45, Vc23p90.4, Vc26p234.1, Vc28a290.34, Vc28p309.2, Vc29p226.18, Vc29p50.1, Vc2a358.33, Vc2p377.22, Vc32p295.10, Vc32p295.2, Vc33a201.41, Vc33p116.4, Vc3p423.0, Vc40p195.0, Vc40p195.2, Vc40s195.20, Vc41a69.20, Vc46p72.6, Vc…	45	9109	88	52010	0.5114	6.85612e-13	****	3.66474e-11	****	Se vs Sa		GO:0004506	MF
74	GO:0008194	MF	UDP-glycosyltransferase activity	Novel3202, Vc11p356.13, Vc14s354.49, Vc15a348.41, Vc16s325.47, Vc1a316.27, Vc1a318.41, Vc20a68.33, Vc20a68.35, Vc24a46.35, Vc28a290.34, Vc30s175.29, Vc32p137.5, Vc32p295.2, Vc36p225.11, Vc36p225.9, Vc36s226.33, Vc37a300.34, Vc39p2.0, Vc40a5.27, Vc48p74.12, Vc48s55.35, Vc4p123.16, Vc4p123.4, Vc552s0.9, Vc9p80.14, Vc9p80.5	27	1861	190	52010	0.1421	1.18239e-09	****	2.37597e-08	****	Ex vs Sa		74	GO:0006833	BP	water transport	Vc12a290.24, Vc1334s0.10, Vc13a192.29, Vc14a386.31, Vc17s355.42, Vc19a63.33, Vc20a66.39, Vc21p129.2, Vc225a1.30, Vc23a103.24, Vc26a133.20, Vc27a318.45, Vc28a292.34, Vc28a45.24, Vc2a440.34, Vc32a179.30, Vc33a207.17, Vc34s27.36, Vc40a184.31, Vc41a171.17, Vc41a278.57, Vc43s134.30, Vc47a66.24, Vc48a56.38, Vc54a13.52	25	7813	32	52010	0.7812	2.87529e-15	****	1.35061e-13	****	Ex vs Se		74	GO:0098869	BP	cellular oxidant detoxification	Vc10a336.34, Vc10s232.19, Vc115a1.24, Vc11p309.17, Vc12a2.25, Vc12a45.30, Vc12p345.9, Vc12s17.25, Vc12s29.38, Vc13s302.30, Vc14s322.43, Vc14s362.36, Vc15a294.29, Vc16a323.23, Vc16a42.29, Vc16s17.43, Vc16s34.52, Vc17a37.35, Vc17a75.33, Vc18a14.24, Vc18a356.36, Vc18s158.28, Vc19a92.24, Vc1a74.31, Vc1p45.9, Vc1s138.31, Vc1s176.37, Vc1s45.29, Vc20a277.24, Vc21a254.23, Vc21p26.2, Vc23a28.33, Vc23s365.…	110	9109	324	52010	0.3395	7.01479e-13	****	3.69888e-11	****	Se vs Sa		GO:0008194	MF
75	GO:0009607	BP	response to biotic stimulus	Vc10a380.40, Vc10a381.28, Vc10a381.30, Vc10a381.33, Vc10s381.47, Vc1a22.34, Vc1a22.44, Vc28s293.36, Vc5a19.35, Vc5a19.38, Vc5a20.29, Vc8a391.32, Vc8a393.32, Vc8s393.37	14	1861	50	52010	0.28	1.50326e-09	****	2.98047e-08	****	Ex vs Sa		75	GO:0009414	BP	response to water deprivation	Novel4490, Vc10a342.30, Vc115p2.20, Vc11a233.23, Vc11p381.11, Vc12a290.24, Vc14a111.26, Vc14a114.28, Vc14a287.24, Vc14s19.34, Vc15a227.19, Vc15a373.26, Vc15s373.36, Vc16a386.41, Vc16a390.30, Vc17a163.18, Vc17a163.19, Vc18a9.22, Vc18s145.24, Vc199s0.45, Vc1a69.26, Vc1p398.3, Vc21a141.31, Vc21a85.21, Vc21p129.2, Vc21p261.1, Vc22a341.40, Vc22p365.12, Vc23a103.24, Vc24a160.31, Vc24p122.11, Vc24s22.40…	85	7813	239	52010	0.3556	3.23354e-15	****	1.49864e-13	****	Ex vs Se		75	GO:0005515	MF	protein binding	Novel1893, Novel3418, Vc10a174.12, Vc10p20.8, Vc10s107.31, Vc10s48.32, Vc11a382.39, Vc11a383.35, Vc11p335.2, Vc11p335.5, Vc11p339.11, Vc11p349.6, Vc11s334.37, Vc11s350.38, Vc126p0.2, Vc12a254.22, Vc12a356.30, Vc12p28.5, Vc12s78.54, Vc13a19.18, Vc13a32.23, Vc14a236.26, Vc14a256.31, Vc14a264.33, Vc14a286.20, Vc14a371.36, Vc14a372.28, Vc14a76.19, Vc14a79.31, Vc14p380.8, Vc15p286.2, Vc15s324.35, Vc15…	177	9109	607	52010	0.2916	8.89112e-13	****	4.62575e-11	****	Se vs Sa		GO:0009607	BP
76	GO:0006749	BP	glutathione metabolic process	Novel5402, Vc13a26.16, Vc1743a0.5, Vc1a116.48, Vc1a116.49, Vc24a11.46, Vc27a146.27, Vc2a269.40, Vc2a270.34, Vc2p269.6, Vc30a282.25, Vc34a252.24, Vc3a167.35, Vc3a167.39, Vc3p167.17, Vc94a1.35	16	1861	68	52010	0.2353	1.71288e-09	****	3.31071e-08	****	Ex vs Sa		76	GO:0009800	BP	cinnamic acid biosynthetic process	Vc10a222.29, Vc10a222.30, Vc10p225.6, Vc11p299.22, Vc15a283.32, Vc19a331.32, Vc1a185.22, Vc1a186.19, Vc1a187.25, Vc24a101.15, Vc26a180.26, Vc29a173.18, Vc33a169.12, Vc5a235.33, Vc5s236.31, Vc5s236.34, Vc8a235.20, Vc8a235.22, Vc8a236.15	19	7813	20	52010	0.95	3.83805e-15	****	1.7554e-13	****	Ex vs Se		76	GO:0009751	BP	response to salicylic acid	Novel1996, Novel4490, Vc16a144.17, Vc16a95.34, Vc17a294.20, Vc18a258.26, Vc1s138.31, Vc20a121.20, Vc21a6.39, Vc22s52.23, Vc23p119.24, Vc23p152.0, Vc26a4.25, Vc27a261.27, Vc29a1.29, Vc31a5.28, Vc31p58.9, Vc31s56.26, Vc32a98.23, Vc32s46.47, Vc33a314.24, Vc34a85.27, Vc34p141.22, Vc36a201.19, Vc36a294.22, Vc397s0.33, Vc40a267.47, Vc42a199.39, Vc4p252.16, Vc4s377.47, Vc5a126.29, Vc6s20.46, Vc6s23.44, …	38	9109	68	52010	0.5588	1.12093e-12	****	5.75508e-11	****	Se vs Sa		GO:0006749	BP
77	GO:0050660	MF	flavin adenine dinucleotide binding	Vc10a280.34, Vc11p360.7, Vc11s364.56, Vc12a120.20, Vc14a115.38, Vc14s112.39, Vc17s143.21, Vc17s219.15, Vc20a11.26, Vc23a292.22, Vc25a146.28, Vc27p200.0, Vc34p156.4, Vc34s207.24, Vc34s208.24, Vc3a324.28, Vc40a48.15, Vc41a21.20, Vc45a200.22, Vc48s100.43, Vc5a117.19, Vc5a22.20, Vc8s296.44	23	1861	143	52010	0.1608	1.71435e-09	****	3.31071e-08	****	Ex vs Sa		77	GO:0009873	BP	ethylene-activated signaling pathway	Novel2262, Novel3832, Novel4490, Vc13a19.18, Vc14a273.30, Vc14p93.2, Vc16a167.15, Vc17a317.37, Vc17a368.26, Vc17a386.27, Vc17a69.41, Vc17p92.9, Vc190p0.1, Vc19a346.40, Vc19p11.4, Vc19p28.10, Vc19p39.3, Vc1a104.11, Vc20p13.6, Vc20p29.2, Vc20p29.7, Vc20p39.2, Vc21p70.1, Vc24p58.1, Vc25a316.25, Vc25p70.2, Vc26p69.14, Vc26p95.8, Vc27a283.20, Vc27a332.26, Vc27a338.30, Vc28a73.20, Vc28p25.1, Vc28p320.1…	69	7813	176	52010	0.392	4.80029e-15	****	2.16699e-13	****	Ex vs Se		77	GO:0009059	BP	macromolecule biosynthetic process	Vc11a395.31, Vc11p90.11, Vc12a290.25, Vc15a386.30, Vc17a63.26, Vc1a10.41, Vc21a145.19, Vc21p54.4, Vc22a19.24, Vc23s103.32, Vc24a2.30, Vc26a148.16, Vc26a56.34, Vc27a30.24, Vc29a145.15, Vc29a55.29, Vc33a280.28, Vc33s192.37, Vc34s260.51, Vc35a54.42, Vc36a216.26, Vc40a184.32, Vc41a171.18, Vc51a3.26, Vc5s10.54, Vc8s404.41, Vc9a90.20	27	9109	39	52010	0.6923	1.5481e-12	****	7.83415e-11	****	Se vs Sa		GO:0050660	MF
78	GO:0046148	BP	pigment biosynthetic process	Novel3202, Vc14s354.49, Vc1a316.27, Vc20a68.33, Vc20a68.35, Vc28a290.34, Vc32p295.2, Vc36p225.11, Vc36p225.9, Vc36s226.33, Vc37a300.34, Vc39p2.0, Vc48p74.12, Vc48s55.35, Vc4a242.31, Vc4p123.16, Vc552s0.9, Vc9a152.13	18	1861	88	52010	0.2045	1.90356e-09	****	3.62896e-08	****	Ex vs Sa		78	GO:0004674	MF	protein serine/threonine kinase activity	Vc103a1.29, Vc10a334.32, Vc10p322.0, Vc10s399.42, Vc1150p0.6, Vc11a315.22, Vc1233s0.10, Vc12a374.24, Vc133a2.18, Vc136p3.2, Vc13a15.39, Vc13a34.33, Vc13p7.3, Vc13s373.29, Vc13s77.45, Vc14a102.30, Vc14p124.11, Vc14p314.0, Vc14p363.21, Vc14s250.38, Vc151a2.48, Vc15a302.29, Vc15s15.27, Vc1602s0.7, Vc16a343.14, Vc16s187.25, Vc16s225.46, Vc17a151.17, Vc17a300.21, Vc17a327.28, Vc17a334.31, Vc17a384.21,…	200	7813	779	52010	0.2567	5.20229e-15	****	2.31836e-13	****	Ex vs Se		78	GO:0005200	MF	structural constituent of cytoskeleton	Vc10a121.22, Vc10a345.26, Vc11a245.18, Vc11a8.21, Vc11p339.11, Vc12a300.32, Vc13a108.11, Vc13a78.32, Vc15p329.28, Vc16a348.28, Vc16a381.41, Vc17a17.16, Vc17s221.33, Vc18a15.26, Vc18a48.38, Vc1a309.26, Vc20s322.41, Vc24p75.4, Vc30a327.34, Vc31a295.31, Vc31a325.19, Vc32a266.23, Vc32s287.27, Vc34a256.31, Vc34s153.29, Vc35a236.28, Vc44a240.22, Vc45a28.21, Vc45a31.32, Vc4a328.35, Vc5a52.28, Vc5s288.39…	35	9109	60	52010	0.5833	1.56603e-12	****	7.83415e-11	****	Se vs Sa		GO:0046148	BP
79	GO:0004568	MF	chitinase activity	Vc12a10.30, Vc12a37.34, Vc12p382.8, Vc13a314.25, Vc23s17.40, Vc25a163.31, Vc25a163.32, Vc25a163.34, Vc25a163.35, Vc2a101.19, Vc41a264.29, Vc53a15.52, Vc583a0.14	13	1861	43	52010	0.3023	2.02774e-09	****	3.81678e-08	****	Ex vs Sa		79	GO:0012511	CC	monolayer-surrounded lipid storage body	Vc10a149.15, Vc13p215.14, Vc13p64.7, Vc14a174.42, Vc19p29.0, Vc1s138.31, Vc200a0.29, Vc20p29.3, Vc21a334.28, Vc21p97.3, Vc26p95.5, Vc29p96.2, Vc30p185.0, Vc30p343.16, Vc32p166.4, Vc32p301.2, Vc33p241.8, Vc35p269.2, Vc36p57.7, Vc3a222.38, Vc48a87.31, Vc5a126.29, Vc87p0.3, Vc8a283.29, Vc9p352.2	25	7813	33	52010	0.7576	1.01549e-14	****	4.46816e-13	****	Ex vs Se		79	GO:0004197	MF	cysteine-type endopeptidase activity	Vc11a399.36, Vc12p86.3, Vc14a325.40, Vc14a7.27, Vc153a2.51, Vc15a391.61, Vc17a241.25, Vc19p30.16, Vc20p31.13, Vc22s33.65, Vc249a0.58, Vc25a12.29, Vc28s326.53, Vc2a18.16, Vc2a376.23, Vc306s0.50, Vc317a0.37, Vc31a105.29, Vc320s0.45, Vc3a33.22, Vc3a422.13, Vc48s85.37, Vc62a3.25, Vc74a2.36, Vc75a2.36, Vc78a2.22, Vc79s1.41, Vc7s241.44, Vc81a5.33	29	9109	44	52010	0.6591	1.58813e-12	****	7.84414e-11	****	Se vs Sa		GO:0004568	MF
80	GO:0046577	MF	long-chain-alcohol oxidase activity	Vc10a280.34, Vc11s364.56, Vc17s143.21, Vc34s207.24, Vc34s208.24, Vc5a117.19, Vc8s296.44	7	1861	9	52010	0.7778	2.50996e-09	****	4.6654e-08	****	Ex vs Sa		80	GO:0016616	MF	oxidoreductase activity, acting on the CH-OH group of donors, NAD or NADP as acceptor	Vc1102p0.1, Vc11a233.23, Vc11s320.37, Vc139a1.25, Vc149s2.68, Vc14a183.19, Vc15a227.19, Vc15a308.29, Vc16a13.35, Vc16a13.36, Vc17a93.20, Vc17s293.34, Vc17s335.37, Vc187a1.54, Vc18a360.34, Vc18a360.35, Vc18s145.24, Vc19a22.35, Vc19a256.19, Vc19a366.36, Vc20a23.26, Vc21a241.21, Vc22a38.50, Vc22s26.56, Vc23s145.18, Vc24a160.31, Vc26a0.15, Vc26a237.28, Vc27a54.30, Vc28a160.23, Vc29p229.2, Vc2a267.30,…	66	7813	167	52010	0.3952	1.17488e-14	****	5.10486e-13	****	Ex vs Se		80	GO:0005794	CC	Golgi apparatus	Vc10a237.19, Vc10a325.24, Vc10p299.1, Vc117a2.46, Vc11a237.31, Vc11a242.24, Vc11a288.24, Vc11a364.40, Vc11s235.30, Vc12a254.22, Vc12a345.43, Vc132a2.37, Vc1334a0.9, Vc1353a0.6, Vc13a50.37, Vc13a7.23, Vc146a2.57, Vc146p0.4, Vc14a223.28, Vc14a274.20, Vc14a283.33, Vc14s141.21, Vc14s229.35, Vc15a127.17, Vc15a321.40, Vc15s232.44, Vc15s236.48, Vc15s236.53, Vc15s320.73, Vc16a16.38, Vc16a213.28, Vc16a350…	207	9109	745	52010	0.2779	1.84265e-12	****	8.98752e-11	****	Se vs Sa		GO:0046577	MF
81	GO:0051213	MF	dioxygenase activity	Novel1520, Novel2248, Vc11s369.50, Vc14p329.0, Vc16s40.47, Vc20a269.18, Vc21p326.1, Vc22a131.24, Vc22a352.23, Vc2a379.38, Vc38a291.14, Vc38a291.15, Vc3a29.38, Vc3s6.50, Vc43a37.30, Vc43p36.14, Vc46a11.23, Vc46a171.29, Vc4a31.55, Vc4a9.46, Vc5a375.24, Vc7a383.31, Vc9s5.39	23	1861	148	52010	0.1554	3.40435e-09	****	6.24971e-08	****	Ex vs Sa		81	GO:0006558	BP	L-phenylalanine metabolic process	Vc10a222.29, Vc10a222.30, Vc10p225.6, Vc11a255.46, Vc11a288.26, Vc11p299.22, Vc11s215.35, Vc15a272.36, Vc15a283.32, Vc15s208.30, Vc16p232.2, Vc19a320.28, Vc19a331.32, Vc1a185.22, Vc1a186.19, Vc1a187.25, Vc217p1.3, Vc22p246.0, Vc24a101.15, Vc24a111.29, Vc26a180.26, Vc29a173.18, Vc33a169.12, Vc47p59.3, Vc5a235.33, Vc5s236.31, Vc5s236.34, Vc8a235.20, Vc8a235.22, Vc8a236.15	30	7813	46	52010	0.6522	1.55374e-14	****	6.66765e-13	****	Ex vs Se		81	GO:0046283	BP	anthocyanin-containing compound metabolic process	Novel4995, Vc10a113.26, Vc10a113.31, Vc12p300.7, Vc13p70.2, Vc13p70.4, Vc14s354.49, Vc14s6.29, Vc18s75.37, Vc1a316.27, Vc1s317.29, Vc200s1.44, Vc20a45.21, Vc21p49.17, Vc22p189.5, Vc23a248.45, Vc23p90.4, Vc26p234.1, Vc28a290.34, Vc28p309.2, Vc29p226.18, Vc29p50.1, Vc2a358.33, Vc2p377.22, Vc32p295.10, Vc32p295.2, Vc33a201.41, Vc33p116.4, Vc3p423.0, Vc40p195.0, Vc40p195.2, Vc40s195.20, Vc41a69.20, V…	45	9109	91	52010	0.4945	3.13867e-12	****	1.51198e-10	****	Se vs Sa		GO:0051213	MF
82	GO:0050896	BP	response to stimulus	Vc10p255.13, Vc13a268.27, Vc13s269.25, Vc13s73.43, Vc14a115.38, Vc17a253.28, Vc17a253.29, Vc17a56.37, Vc20a377.29, Vc21a188.12, Vc26p190.13, Vc27a234.37, Vc27p234.24, Vc29a17.49, Vc29p183.8, Vc2a232.32, Vc2a256.27, Vc30a132.30, Vc30a333.23, Vc30a343.52, Vc32a291.34, Vc32a81.39, Vc33a297.25, Vc33p160.13, Vc34a122.19, Vc34a251.27, Vc35a222.14, Vc37a105.23, Vc38s175.32, Vc42a181.27, Vc42p22.4, Vc42s…	35	1861	317	52010	0.1104	4.70197e-09	****	8.52662e-08	****	Ex vs Sa		82	GO:0009611	BP	response to wounding	Novel2248, Novel4416, Vc1139p0.1, Vc12s40.56, Vc13a46.32, Vc15a262.30, Vc16a95.34, Vc17a321.35, Vc17p323.0, Vc19a309.53, Vc20a121.20, Vc21s15.39, Vc22a131.24, Vc22a254.31, Vc22a311.33, Vc22a341.40, Vc22p234.9, Vc23a357.24, Vc23p119.24, Vc23s303.41, Vc24a122.25, Vc25p330.6, Vc26p329.6, Vc27a286.23, Vc27p288.0, Vc28a226.19, Vc29a17.47, Vc29s11.26, Vc2p333.1, Vc30a270.32, Vc30a303.29, Vc32a318.21, V…	63	7813	157	52010	0.4013	2.01064e-14	****	8.52317e-13	****	Ex vs Se		82	GO:0009536	CC	plastid	Novel0855, Novel4100, Vc10a260.15, Vc10a373.30, Vc10p20.8, Vc10p371.5, Vc10s6.28, Vc11a249.25, Vc11a379.21, Vc11p349.6, Vc11p379.0, Vc11p90.11, Vc11s221.30, Vc1269a0.3, Vc12a345.43, Vc130a2.41, Vc131a3.40, Vc132p0.16, Vc13a90.24, Vc13s266.40, Vc13s86.26, Vc148s1.45, Vc14s204.27, Vc14s46.29, Vc15a240.24, Vc15a379.27, Vc15p371.13, Vc15s371.27, Vc15s42.18, Vc166a1.26, Vc16a375.27, Vc16s148.24, Vc17a…	241	9109	906	52010	0.266	4.12942e-12	****	1.965e-10	****	Se vs Sa		GO:0050896	BP
83	GO:0004674	MF	protein serine/threonine kinase activity	Novel5248, Vc103a1.29, Vc10p322.0, Vc1201p0.0, Vc133a2.18, Vc151a2.48, Vc151p1.1, Vc151s0.37, Vc16p382.10, Vc17a151.17, Vc17a50.20, Vc17a80.35, Vc17p141.9, Vc18a14.32, Vc1a257.20, Vc1a430.38, Vc1p428.27, Vc1p90.7, Vc1s428.50, Vc21s149.31, Vc22a46.33, Vc22p126.3, Vc22p23.13, Vc24p205.10, Vc24s195.43, Vc24s205.89, Vc28a32.43, Vc29s151.27, Vc29s336.30, Vc2a351.29, Vc2s50.28, Vc2s51.32, Vc31a291.25, …	62	1861	779	52010	0.0796	5.84645e-09	****	1.04743e-07	****	Ex vs Sa		83	GO:0009507	CC	chloroplast	Novel1893, Novel2248, Vc106a4.43, Vc106s4.53, Vc10a110.25, Vc10a139.26, Vc10a224.21, Vc10a229.25, Vc10a246.22, Vc10a262.17, Vc10a317.24, Vc10a361.24, Vc10p252.10, Vc10s119.52, Vc10s232.19, Vc1139p0.1, Vc11a224.39, Vc11a232.28, Vc11a233.23, Vc11a259.34, Vc11a269.31, Vc11a294.25, Vc11p309.17, Vc11s372.31, Vc11s73.25, Vc126p0.2, Vc12a26.21, Vc12a55.21, Vc12a55.22, Vc12a66.22, Vc12a78.41, Vc12p239.1,…	318	7813	1410	52010	0.2255	2.05376e-14	****	8.60106e-13	****	Ex vs Se		83	GO:0016740	MF	transferase activity	Novel2304, Novel2480, Novel3021, Novel4065, Novel4142, Vc1030p0.0, Vc10a390.33, Vc10p6.0, Vc10s122.36, Vc10s325.25, Vc10s366.35, Vc10s373.35, Vc10s378.40, Vc11a323.40, Vc11a345.35, Vc11a387.26, Vc11s235.30, Vc11s331.44, Vc11s82.34, Vc1256a0.4, Vc12a50.33, Vc12a74.32, Vc12p314.6, Vc12s322.27, Vc12s360.40, Vc130a1.39, Vc13a44.45, Vc13p354.9, Vc13p85.8, Vc13s23.34, Vc13s354.43, Vc1480a0.6, Vc14a172.…	248	9109	942	52010	0.2633	6.38787e-12	****	2.99513e-10	****	Se vs Sa		GO:0004674	MF
84	GO:0016998	BP	cell wall macromolecule catabolic process	Vc12a10.30, Vc12a37.34, Vc12p382.8, Vc13a314.25, Vc23s17.40, Vc25a163.31, Vc25a163.32, Vc25a163.34, Vc25a163.35, Vc2a101.19, Vc41a264.29, Vc53a15.52	12	1861	39	52010	0.3077	6.77547e-09	****	1.19942e-07	****	Ex vs Sa		84	GO:0140359	MF	ABC-type transporter activity	Vc10a371.19, Vc10p144.11, Vc11a361.31, Vc11a54.15, Vc1269a0.3, Vc12a51.41, Vc13s92.35, Vc14p326.33, Vc15a354.37, Vc15a61.19, Vc189s1.41, Vc19a156.18, Vc19a318.36, Vc19s298.17, Vc1a11.39, Vc20a343.24, Vc20p342.1, Vc20p342.8, Vc22a179.20, Vc22p242.4, Vc24a40.32, Vc24s329.29, Vc26p167.7, Vc28a32.42, Vc28p32.4, Vc29p164.1, Vc29s239.22, Vc2a335.27, Vc2a377.57, Vc30s315.20, Vc31a139.18, Vc31s56.26, Vc3…	66	7813	169	52010	0.3905	2.31326e-14	****	9.57247e-13	****	Ex vs Se		84	GO:0015171	MF	amino acid transmembrane transporter activity	Vc10p196.15, Vc11s371.38, Vc14s344.50, Vc151a0.26, Vc17s16.50, Vc17s292.36, Vc18s48.44, Vc19s65.38, Vc1a212.15, Vc1s459.38, Vc22a290.27, Vc25a211.24, Vc26s184.18, Vc28s28.41, Vc2a200.31, Vc301p0.12, Vc33s165.33, Vc34a88.25, Vc34p257.19, Vc37a242.20, Vc39a75.25, Vc43a98.29, Vc44s20.22, Vc45p29.15, Vc45p31.19, Vc46a143.20, Vc49a33.39, Vc62s8.93, Vc6s347.24, Vc8s210.28, Vc90a3.26	31	9109	51	52010	0.6078	6.44774e-12	****	2.99513e-10	****	Se vs Sa		GO:0016998	BP
85	GO:0009812	BP	flavonoid metabolic process	Novel3539, Vc25a173.26, Vc2a67.14, Vc35a1.21, Vc3a334.17, Vc4p104.3, Vc9p64.0	7	1861	10	52010	0.7	8.10581e-09	****	1.41804e-07	****	Ex vs Sa		85	GO:0004553	MF	hydrolase activity, hydrolyzing O-glycosyl compounds	Vc10s13.30, Vc10s4.44, Vc11p335.2, Vc11p335.5, Vc11p90.11, Vc11s398.32, Vc12a298.31, Vc12a38.26, Vc1584a0.5, Vc15a263.29, Vc15a97.35, Vc17s224.18, Vc17s290.36, Vc19a26.20, Vc19a311.28, Vc1s442.37, Vc20a157.23, Vc221p1.6, Vc22a291.34, Vc22a67.34, Vc22p271.9, Vc23a93.31, Vc24s121.39, Vc28a165.20, Vc28p330.2, Vc29a221.37, Vc2a24.20, Vc31s261.40, Vc338s0.31, Vc34a17.21, Vc35a82.30, Vc35a84.23, Vc35a8…	68	7813	177	52010	0.3842	2.44086e-14	****	9.98167e-13	****	Ex vs Se		85	GO:0009873	BP	ethylene-activated signaling pathway	Novel2262, Novel3832, Novel4490, Vc10a378.29, Vc11p28.4, Vc12p209.5, Vc13a19.18, Vc14a273.30, Vc14p93.2, Vc16a167.15, Vc17a317.37, Vc17a368.26, Vc17a386.27, Vc17a69.41, Vc17p92.9, Vc19a346.40, Vc19p11.4, Vc19p39.3, Vc1a104.11, Vc1a24.34, Vc20a302.16, Vc20p13.6, Vc20p39.2, Vc222p0.3, Vc23p236.2, Vc24a7.31, Vc24a87.25, Vc25a316.25, Vc25p70.2, Vc26p95.8, Vc27a283.20, Vc27a332.26, Vc27a338.30, Vc28a7…	69	9109	176	52010	0.392	8.85033e-12	****	4.06282e-10	****	Se vs Sa		GO:0009812	BP
86	GO:0042221	BP	response to chemical	Novel5402, Vc12a50.33, Vc13a26.16, Vc1743a0.5, Vc1a116.48, Vc1a116.49, Vc24a11.46, Vc2a269.40, Vc2a270.34, Vc2p269.6, Vc30a282.25, Vc34a252.24, Vc36s268.40, Vc3a167.35, Vc3a167.39, Vc42a34.23, Vc94a1.35	17	1861	87	52010	0.1954	1.1058e-08	****	1.91201e-07	****	Ex vs Sa		86	GO:0015297	MF	antiporter activity	Vc10s398.35, Vc11a111.24, Vc11s112.24, Vc13a252.24, Vc13a7.23, Vc13p332.7, Vc146a2.57, Vc14a186.29, Vc14a274.20, Vc14p264.18, Vc14s392.31, Vc15a107.18, Vc16a213.28, Vc17s233.38, Vc19a44.49, Vc19s200.30, Vc20s143.34, Vc21a317.34, Vc21p311.0, Vc22s132.37, Vc22s25.18, Vc23p273.7, Vc23s85.40, Vc24a293.28, Vc24a293.29, Vc26a309.28, Vc26p304.17, Vc26s304.43, Vc26s305.50, Vc28a334.35, Vc28s206.51, Vc29a…	73	7813	197	52010	0.3706	2.49532e-14	****	1.00546e-12	****	Ex vs Se		86	GO:0042542	BP	response to hydrogen peroxide	Vc140a1.34, Vc148s2.69, Vc15p329.2, Vc16a144.17, Vc16a95.34, Vc17a294.20, Vc17a341.47, Vc18a258.26, Vc19p357.13, Vc19s349.40, Vc20a121.20, Vc21p134.1, Vc24p83.21, Vc26p137.7, Vc27a125.49, Vc27a261.27, Vc27a304.48, Vc27a333.41, Vc29p134.6, Vc29p135.3, Vc31a5.28, Vc31p58.9, Vc32a98.23, Vc34a85.27, Vc35a177.13, Vc36a177.9, Vc36a294.22, Vc38a123.26, Vc38a87.26, Vc39s131.28, Vc42a199.39, Vc46p142.0, V…	42	9109	84	52010	0.5	1.03192e-11	****	4.68203e-10	****	Se vs Sa		GO:0042221	BP
87	GO:0009986	CC	cell surface	Vc11a269.29, Vc15a255.20, Vc19a301.22, Vc19a303.28, Vc24a130.35, Vc54a12.26, Vc57a6.30, Vc57a7.37	8	1861	15	52010	0.5333	1.36077e-08	****	2.32582e-07	****	Ex vs Sa		87	GO:0048046	CC	apoplast	Vc10a105.22, Vc10a30.27, Vc114a2.35, Vc11a245.14, Vc11a305.23, Vc11p32.6, Vc126s3.69, Vc13a355.23, Vc14a278.15, Vc14a377.25, Vc1584a0.5, Vc17a154.18, Vc17a387.48, Vc17p117.7, Vc17p368.3, Vc17s19.29, Vc19s291.30, Vc20a157.23, Vc22a67.34, Vc23p250.2, Vc23p303.0, Vc24a143.44, Vc24p18.4, Vc25a320.43, Vc25p330.6, Vc26p79.6, Vc27a337.38, Vc27s115.44, Vc28a165.20, Vc28p240.3, Vc29p159.19, Vc2p333.1, Vc3…	71	7813	189	52010	0.3757	2.51653e-14	****	1.00546e-12	****	Ex vs Se		87	GO:0160062	BP	cutin-based cuticle development	Vc11a395.31, Vc12a290.25, Vc15a386.30, Vc17a63.26, Vc21a145.19, Vc21p54.4, Vc22a19.24, Vc23s103.32, Vc24a2.30, Vc26a148.16, Vc26a56.34, Vc27a30.24, Vc29a145.15, Vc29a55.29, Vc33a280.28, Vc33s192.37, Vc34s260.51, Vc40a184.32, Vc41a171.18, Vc51a3.26	20	9109	25	52010	0.8	1.55045e-11	****	6.95386e-10	****	Se vs Sa		GO:0009986	CC
88	GO:0031542	BP	positive regulation of anthocyanin biosynthetic process	Vc20a68.33, Vc20a68.35, Vc28a290.34, Vc37a300.34, Vc39p2.0, Vc48s55.35	6	1861	7	52010	0.8571	1.41316e-08	****	2.33485e-07	****	Ex vs Sa		88	GO:0160062	BP	cutin-based cuticle development	Novel3206, Vc11a395.31, Vc12a290.25, Vc15a386.30, Vc17a63.26, Vc21a145.19, Vc21p54.4, Vc22a19.24, Vc23s103.32, Vc24a2.30, Vc26a148.16, Vc26a56.34, Vc27a30.24, Vc29a145.15, Vc29a55.29, Vc33a280.28, Vc33s192.37, Vc34s260.51, Vc40a184.32, Vc41a171.18, Vc51a3.26	21	7813	25	52010	0.84	3.4312e-14	****	1.34013e-12	****	Ex vs Se		88	GO:0005615	CC	extracellular space	Vc11a399.36, Vc12a100.16, Vc12a60.43, Vc13a282.24, Vc14a372.28, Vc14s274.29, Vc15a391.61, Vc15s391.62, Vc16a164.21, Vc17s15.35, Vc18a6.28, Vc19a68.53, Vc20a72.60, Vc21s15.41, Vc249a0.58, Vc27p13.2, Vc28a286.23, Vc29s10.40, Vc31a76.17, Vc32a93.23, Vc33a305.26, Vc34s279.54, Vc38a216.21, Vc39a242.28, Vc40a30.26, Vc41p39.24, Vc41p41.22, Vc42p195.3, Vc48a48.25, Vc4s218.31, Vc6a148.13, Vc7a20.26, Vc7a2…	34	9109	61	52010	0.5574	1.89252e-11	****	8.39161e-10	****	Se vs Sa		GO:0031542	BP
89	GO:1901038	BP	cyanidin 3-O-glucoside metabolic process	Vc20a68.33, Vc20a68.35, Vc28a290.34, Vc37a300.34, Vc39p2.0, Vc48s55.35	6	1861	7	52010	0.8571	1.41316e-08	****	2.33485e-07	****	Ex vs Sa		89	GO:0009059	BP	macromolecule biosynthetic process	Novel3206, Vc11a395.31, Vc11p90.11, Vc12a290.25, Vc15a386.30, Vc17a63.26, Vc1a10.41, Vc21a145.19, Vc21p54.4, Vc22a19.24, Vc23s103.32, Vc24a2.30, Vc26a148.16, Vc26a56.34, Vc27a30.24, Vc29a145.15, Vc29a55.29, Vc33a280.28, Vc33s192.37, Vc34s260.51, Vc35a54.42, Vc36a216.26, Vc40a184.32, Vc41a171.18, Vc51a3.26, Vc8s404.41, Vc9a90.20	27	7813	39	52010	0.6923	3.43129e-14	****	1.34013e-12	****	Ex vs Se		89	GO:0098656	BP	monoatomic anion transmembrane transport	Vc12a336.20, Vc13a68.42, Vc16a143.24, Vc173a0.26, Vc17s350.31, Vc19p56.29, Vc27a313.28, Vc2s272.40, Vc30a329.22, Vc30a337.34, Vc31a57.23, Vc32a288.37, Vc32a297.34, Vc32s260.25, Vc32s269.43, Vc32s297.45, Vc34s32.27, Vc35a35.27, Vc36s273.38, Vc3a165.18, Vc40a231.20, Vc41s215.25, Vc44a192.19, Vc4s53.29, Vc7a288.35, Vc94a4.22, Vc9s29.24	27	9109	42	52010	0.6429	2.25041e-11	****	9.75676e-10	****	Se vs Sa		GO:1901038	BP
90	GO:1901806	BP	beta-glucoside biosynthetic process	Vc20a68.33, Vc20a68.35, Vc28a290.34, Vc37a300.34, Vc39p2.0, Vc48s55.35	6	1861	7	52010	0.8571	1.41316e-08	****	2.33485e-07	****	Ex vs Sa		90	GO:0009523	CC	photosystem II	Vc10a262.17, Vc10a40.33, Vc10a52.41, Vc11p117.3, Vc11p371.17, Vc14s167.34, Vc14s323.44, Vc15a364.29, Vc15s113.27, Vc17a80.31, Vc19p195.7, Vc19p374.13, Vc1a388.23, Vc22s341.41, Vc24a31.44, Vc24p288.4, Vc25s185.32, Vc2s374.37, Vc32a55.30, Vc32a72.36, Vc34a269.38, Vc3a229.23, Vc3a34.35, Vc42a207.36, Vc42p207.6, Vc46s176.38, Vc48a58.36, Vc5a366.38, Vc5a379.32, Vc5a402.29, Vc5p367.0, Vc6p121.8, Vc8a28…	38	7813	71	52010	0.5352	5.02464e-14	****	1.94063e-12	****	Ex vs Se		90	GO:0009073	BP	aromatic amino acid family biosynthetic process	Vc12p239.1, Vc13a14.23, Vc16a328.28, Vc16a67.37, Vc16p232.2, Vc16p258.5, Vc18a144.27, Vc18s329.39, Vc19s62.29, Vc22a39.37, Vc23a128.29, Vc23a252.31, Vc23p119.12, Vc28s293.33, Vc28s70.33, Vc30a270.32, Vc31a173.13, Vc31s275.28, Vc34a235.26, Vc40p75.7, Vc41a65.20, Vc42a46.35, Vc42s22.29, Vc48s57.36, Vc612a0.9, Vc7a357.32, Vc7p79.3	27	9109	42	52010	0.6429	2.25041e-11	****	9.75676e-10	****	Se vs Sa		GO:1901806	BP
91	GO:0009926	BP	auxin polar transport	Novel4416, Vc11a269.29, Vc13a46.32, Vc15a255.20, Vc19a301.22, Vc19a303.28, Vc24a130.35, Vc30a303.29, Vc32a318.21, Vc42a14.30	10	1861	27	52010	0.3704	1.6228e-08	****	2.65177e-07	****	Ex vs Sa		91	GO:0030247	MF	polysaccharide binding	Vc1585p0.1, Vc18a292.22, Vc21s40.43, Vc26s40.53, Vc287s0.54, Vc28a212.19, Vc31a14.24, Vc35a54.42, Vc35s152.30, Vc36a110.25, Vc36a216.26, Vc36s205.36, Vc37s84.37, Vc37s86.25, Vc38a194.27, Vc38a194.30, Vc38a195.18, Vc38p195.2, Vc38s195.20, Vc39a215.22, Vc39a223.17, Vc39p218.7, Vc44s67.34, Vc44s68.26, Vc4a250.24, Vc6a169.36, Vc6a206.21, Vc6p169.15, Vc6s168.17, Vc6s169.44, Vc6s172.18, Vc6s172.20, Vc9…	33	7813	56	52010	0.5893	5.52559e-14	****	2.11065e-12	****	Ex vs Se		91	GO:0009705	CC	plant-type vacuole membrane	Vc11s112.24, Vc11s324.40, Vc1295a0.3, Vc13p76.3, Vc15s311.42, Vc17a118.33, Vc17s200.26, Vc19s363.30, Vc1a146.25, Vc1s226.31, Vc20p339.3, Vc20s167.19, Vc225a1.30, Vc22a192.22, Vc22s29.30, Vc24a70.32, Vc26s22.45, Vc27a81.21, Vc27s178.18, Vc28a158.33, Vc28s223.24, Vc29s20.42, Vc32a283.29, Vc33a295.32, Vc34a234.35, Vc350a0.26, Vc35p222.2, Vc35p301.2, Vc36a128.25, Vc36p21.9, Vc39a37.26, Vc41a232.27, V…	44	9109	92	52010	0.4783	2.28745e-11	****	9.80838e-10	****	Se vs Sa		GO:0009926	BP
92	GO:1990961	BP	xenobiotic detoxification by transmembrane export across the plasma membrane	Vc14s366.38, Vc21p311.0, Vc23a333.30, Vc26s304.43, Vc26s305.50, Vc29p292.3, Vc2a421.33, Vc35s82.35, Vc36s159.21, Vc3a104.21, Vc40a9.29, Vc4a170.22, Vc4a293.24	13	1861	51	52010	0.2549	2.02175e-08	****	3.26777e-07	****	Ex vs Sa		92	GO:0045735	MF	nutrient reservoir activity	Vc10a149.15, Vc11a368.33, Vc19a62.27, Vc21a334.28, Vc22a272.27, Vc22a332.52, Vc22p332.1, Vc22p332.4, Vc28s293.31, Vc28s328.36, Vc31a341.58, Vc31a93.28, Vc32a17.19, Vc3a40.37, Vc43a40.55, Vc43p41.24, Vc46a167.31, Vc46a168.26, Vc46p167.5, Vc46p168.1, Vc46s167.42, Vc46s168.45, Vc47a159.40, Vc47a175.25, Vc47a90.24, Vc47p159.15, Vc47p159.4, Vc47s159.56, Vc47s159.63, Vc48a57.30, Vc7a251.20, Vc7a27.35, …	34	7813	59	52010	0.5763	5.76275e-14	****	2.17732e-12	****	Ex vs Se		92	GO:0047274	MF	galactinol-sucrose galactosyltransferase activity	Vc10a136.27, Vc10a137.20, Vc11a394.26, Vc16a19.20, Vc16p36.1, Vc18a367.20, Vc1a293.20, Vc24a3.27, Vc38s44.21, Vc39a40.28, Vc51a4.27, Vc5a273.13, Vc6s374.24, Vc7p394.1	14	9109	14	52010	1	2.53392e-11	****	1.06671e-09	****	Se vs Sa		GO:1990961	BP
93	GO:0043473	BP	pigmentation	Vc13a41.36, Vc30a208.37, Vc30a297.38, Vc32a323.35, Vc36p225.11, Vc42p20.3, Vc4p123.16	7	1861	11	52010	0.6364	2.15966e-08	****	3.45314e-07	****	Ex vs Sa		93	GO:0009522	CC	photosystem I	Vc10a40.33, Vc10a52.41, Vc11a269.31, Vc11p117.3, Vc14s167.34, Vc14s323.44, Vc15s113.27, Vc17a80.31, Vc19p195.7, Vc1a388.23, Vc1p460.22, Vc207p1.1, Vc24a130.34, Vc24p288.4, Vc25s185.32, Vc2s374.37, Vc34a269.38, Vc3a229.23, Vc3a34.35, Vc48a58.36, Vc5a366.38, Vc5a379.32, Vc5a402.29, Vc5p367.0, Vc62p8.4, Vc8a28.24, Vc8a48.30, Vc8a64.34, Vc9a227.31, Vc9s333.29	30	7813	48	52010	0.625	8.38394e-14	****	3.13361e-12	****	Ex vs Se		93	GO:0009737	BP	response to abscisic acid	Novel2381, Novel4490, Vc102a4.41, Vc10a199.19, Vc10a224.21, Vc10s394.22, Vc12p55.3, Vc13s94.34, Vc140a1.34, Vc14p287.0, Vc15p371.13, Vc163a1.30, Vc16a386.41, Vc16a95.34, Vc17a247.17, Vc18a9.22, Vc199s0.45, Vc19s378.36, Vc19s381.33, Vc1a20.24, Vc1a209.13, Vc1a7.44, Vc1s138.31, Vc20a121.20, Vc20a209.29, Vc20s9.44, Vc21a203.25, Vc21a241.21, Vc21a6.39, Vc21a85.21, Vc21s80.35, Vc22a72.30, Vc22p151.4, …	99	9109	296	52010	0.3345	2.54238e-11	****	1.06671e-09	****	Se vs Sa		GO:0043473	BP
94	GO:0016229	MF	steroid dehydrogenase activity	Vc1102p0.1, Vc17s293.34, Vc21a150.23, Vc22a38.50, Vc29a151.24, Vc33a186.25, Vc36a33.15, Vc38a282.38, Vc526p0.3	9	1861	22	52010	0.4091	3.07594e-08	****	4.86587e-07	****	Ex vs Sa		94	GO:0015171	MF	amino acid transmembrane transporter activity	Vc10p196.15, Vc11s371.38, Vc14s344.50, Vc151a0.26, Vc17s292.36, Vc18a335.22, Vc18s48.44, Vc19a43.41, Vc19s65.38, Vc1a403.29, Vc1a459.29, Vc1s459.38, Vc22a290.27, Vc23p356.19, Vc25a211.24, Vc28s28.41, Vc2a200.31, Vc2a443.35, Vc301p0.12, Vc34a88.25, Vc34p257.19, Vc37a169.19, Vc38a138.24, Vc39a145.18, Vc39a75.25, Vc41a276.28, Vc44s20.22, Vc45p29.15, Vc46a143.20, Vc49a33.39, Vc8s210.28	31	7813	51	52010	0.6078	9.71236e-14	****	3.59151e-12	****	Ex vs Se		94	GO:0007010	BP	cytoskeleton organization	Vc10a121.22, Vc10a345.26, Vc11a245.18, Vc11a8.21, Vc11p339.11, Vc13a108.11, Vc13a78.32, Vc15p329.28, Vc16a348.28, Vc16a381.41, Vc17a17.16, Vc17s221.33, Vc18a15.26, Vc18a48.38, Vc1a309.26, Vc20s322.41, Vc21s326.34, Vc24p75.4, Vc29s305.37, Vc30a327.34, Vc31a295.31, Vc31a325.19, Vc32a266.23, Vc32s287.27, Vc34a256.31, Vc34s153.29, Vc35a236.28, Vc42a184.30, Vc44a240.22, Vc45a28.21, Vc45a31.32, Vc4a328…	37	9109	71	52010	0.5211	3.59846e-11	****	1.49374e-09	****	Se vs Sa		GO:0016229	MF
95	GO:0009809	BP	lignin biosynthetic process	Vc149s2.68, Vc17p329.4, Vc20a5.31, Vc21a112.20, Vc21a112.21, Vc27s291.30, Vc29a112.21, Vc30p58.9, Vc33a226.20, Vc34s139.31, Vc374s0.33, Vc39a61.32, Vc45s216.26, Vc48a105.37	14	1861	62	52010	0.2258	3.11794e-08	****	4.8804e-07	****	Ex vs Sa		95	GO:0051762	BP	sesquiterpene biosynthetic process	Vc112a0.32, Vc13a136.41, Vc13a136.42, Vc13a138.30, Vc13a159.12, Vc13a238.27, Vc14s19.34, Vc15a239.39, Vc17a387.47, Vc211a0.22, Vc211a0.23, Vc21a13.24, Vc22a197.17, Vc25s25.33, Vc27a337.39, Vc29a7.44, Vc302a0.32, Vc30a161.25, Vc30a169.20, Vc30a229.25, Vc32a151.27, Vc32a159.26, Vc33a270.23, Vc33p307.8, Vc34a8.24, Vc34a9.26, Vc35p272.23, Vc37s189.25, Vc3a410.20, Vc41a202.24, Vc42a154.36, Vc42a90.16,…	39	7813	76	52010	0.5132	1.43323e-13	****	5.24412e-12	****	Ex vs Se		95	GO:0009423	BP	chorismate biosynthetic process	Vc12p239.1, Vc13a14.23, Vc16a328.28, Vc16p258.5, Vc18a144.27, Vc19s62.29, Vc20s122.39, Vc22a39.37, Vc23a128.29, Vc23a252.31, Vc23p119.12, Vc28s293.33, Vc30a270.32, Vc31s204.43, Vc31s275.28, Vc34a235.26, Vc40p75.7, Vc41a65.20, Vc42a46.35, Vc42s22.29, Vc48s57.36, Vc612a0.9, Vc7p142.12, Vc7p79.3	24	9109	35	52010	0.6857	3.75787e-11	****	1.5435e-09	****	Se vs Sa		GO:0009809	BP
96	GO:0003700	MF	DNA-binding transcription factor activity	Vc10a390.33, Vc10p26.5, Vc11a207.26, Vc11s334.37, Vc12a395.19, Vc14a273.30, Vc14p199.7, Vc15a200.28, Vc15a341.41, Vc15s305.29, Vc15s324.35, Vc17a317.37, Vc17p311.1, Vc18a20.24, Vc18a364.34, Vc19a273.26, Vc19a368.29, Vc19p28.10, Vc1a360.23, Vc20a302.16, Vc20a371.28, Vc20p204.0, Vc20p29.2, Vc20p29.7, Vc20p356.10, Vc22a10.31, Vc22a41.25, Vc23a21.19, Vc24a191.23, Vc24a49.49, Vc24s64.33, Vc26a72.28, V…	74	1861	1055	52010	0.0701	4.2653e-08	****	6.60677e-07	****	Ex vs Sa		96	GO:0016621	MF	cinnamoyl-CoA reductase activity	Vc11s320.37, Vc13a67.37, Vc14a46.20, Vc15a308.29, Vc17s293.34, Vc17s335.37, Vc19a366.36, Vc25a44.25, Vc26a16.35, Vc29a16.15, Vc2a351.33, Vc2a63.19, Vc30a338.22, Vc32a297.40, Vc33p299.18, Vc35p293.6, Vc36a33.15, Vc36p33.3, Vc37a289.46, Vc39a12.37, Vc3a382.28, Vc4p398.7, Vc8s149.28, Vc9p377.29	24	7813	33	52010	0.7273	1.61585e-13	****	5.85073e-12	****	Ex vs Se		96	GO:0050661	MF	NADP binding	Vc11p360.7, Vc12p345.9, Vc14a174.42, Vc14s199.40, Vc14s288.42, Vc166a1.26, Vc16a0.17, Vc16a347.20, Vc16p258.5, Vc16s262.34, Vc16s97.20, Vc18a144.27, Vc18a49.30, Vc18s100.32, Vc18s299.27, Vc18s382.86, Vc19s110.25, Vc200a0.29, Vc20p107.2, Vc22s304.47, Vc23a28.33, Vc24s41.43, Vc25s256.50, Vc25s331.46, Vc27p90.1, Vc28p247.2, Vc2a245.40, Vc2s239.36, Vc30a80.26, Vc31a294.27, Vc31s7.29, Vc32a15.27, Vc35…	54	9109	127	52010	0.4252	4.13774e-11	****	1.68182e-09	****	Se vs Sa		GO:0003700	MF
97	GO:0008283	BP	cell population proliferation	Vc13a112.29, Vc16a136.20, Vc21a249.36, Vc23s296.31, Vc29s235.27, Vc31a48.13, Vc33a107.21, Vc33a45.34, Vc7a300.25	9	1861	23	52010	0.3913	4.89204e-08	****	7.49944e-07	****	Ex vs Sa		97	GO:0015267	MF	channel activity	Vc10a342.30, Vc12a290.24, Vc1334s0.10, Vc13a192.29, Vc14a386.31, Vc17s355.42, Vc19a63.33, Vc20a207.33, Vc20a66.39, Vc21p129.2, Vc225a1.30, Vc23a103.24, Vc26a133.20, Vc27a318.45, Vc28a142.19, Vc28a292.34, Vc28a45.24, Vc2a440.34, Vc32a179.30, Vc33a207.17, Vc34s27.36, Vc35a94.33, Vc40a184.31, Vc41a171.17, Vc41a278.57, Vc43s134.30, Vc44a148.41, Vc47a66.24, Vc48a56.38, Vc54a13.52	30	7813	49	52010	0.6122	1.84985e-13	****	6.62896e-12	****	Ex vs Se		97	GO:0048046	CC	apoplast	Vc10a105.22, Vc10a30.27, Vc11a245.14, Vc11a305.23, Vc11p17.1, Vc126s3.69, Vc12s241.17, Vc13a118.26, Vc13a355.23, Vc14a377.25, Vc1584a0.5, Vc17a154.18, Vc17a387.48, Vc17p368.3, Vc19s291.30, Vc20a157.23, Vc21a20.31, Vc22a67.34, Vc23p303.0, Vc23s258.21, Vc24a104.19, Vc24a143.44, Vc24p18.4, Vc25p330.6, Vc27a337.38, Vc27a35.20, Vc27p90.1, Vc27s115.44, Vc28a165.20, Vc28p240.3, Vc29p159.19, Vc2p377.6, V…	71	9109	189	52010	0.3757	4.58942e-11	****	1.84618e-09	****	Se vs Sa		GO:0008283	BP
98	GO:0050563	MF	trans-feruloyl-CoA synthase activity	Vc17p323.0, Vc27p288.0, Vc34p57.9, Vc38s101.15, Vc50p21.6, Vc6a422.25	6	1861	8	52010	0.75	5.47992e-08	****	8.23095e-07	****	Ex vs Sa		98	GO:0046283	BP	anthocyanin-containing compound metabolic process	Novel3202, Novel4995, Vc10a113.26, Vc11p337.3, Vc12p300.7, Vc13p70.2, Vc13p70.4, Vc14s354.49, Vc14s6.29, Vc18s75.37, Vc1s317.29, Vc200s1.44, Vc20a45.21, Vc20a68.33, Vc21p49.17, Vc22p189.5, Vc23p90.4, Vc26p234.1, Vc28a290.34, Vc29p226.18, Vc2a358.33, Vc2p377.22, Vc32p295.10, Vc32p295.2, Vc36p225.11, Vc37a300.34, Vc39p2.0, Vc3p423.0, Vc40p195.0, Vc40p195.2, Vc40s195.20, Vc46p72.6, Vc46p76.4, Vc48s5…	43	7813	91	52010	0.4725	3.36086e-13	****	1.19208e-11	****	Ex vs Se		98	GO:0009664	BP	plant-type cell wall organization	Vc11a314.24, Vc15s301.23, Vc16p65.2, Vc17a52.13, Vc18a331.22, Vc18p151.13, Vc19a32.35, Vc19p32.2, Vc19p50.5, Vc19s32.42, Vc19s372.36, Vc20a33.37, Vc20a50.33, Vc20p54.3, Vc24p60.4, Vc26a108.32, Vc27a32.20, Vc28a303.45, Vc28a324.47, Vc28a324.50, Vc29a109.28, Vc2s394.48, Vc32a283.29, Vc33a230.29, Vc34s309.25, Vc501p0.9, Vc7a359.21	27	9109	43	52010	0.6279	5.03312e-11	****	2.004e-09	****	Se vs Sa		GO:0050563	MF
99	GO:0106286	MF	(E)-caffeate-CoA ligase activity	Vc17p323.0, Vc27p288.0, Vc34p57.9, Vc38s101.15, Vc50p21.6, Vc6a422.25	6	1861	8	52010	0.75	5.47992e-08	****	8.23095e-07	****	Ex vs Sa		99	GO:0009506	CC	plasmodesma	Vc112p1.10, Vc11a307.39, Vc11p32.6, Vc11p90.11, Vc120a0.27, Vc120a3.48, Vc12a254.22, Vc12a44.31, Vc12p138.6, Vc12s139.44, Vc13a282.27, Vc145a0.34, Vc14a256.31, Vc14a47.26, Vc15a159.14, Vc16a350.21, Vc17a154.18, Vc17a22.22, Vc18a297.33, Vc19a272.32, Vc19a346.40, Vc19a363.26, Vc19a78.32, Vc19s268.54, Vc23p127.6, Vc24a176.42, Vc24s214.30, Vc25a100.22, Vc25a286.23, Vc25a297.30, Vc25a307.30, Vc25a310.…	78	7813	227	52010	0.3436	3.45428e-13	****	1.21284e-11	****	Ex vs Se		99	GO:0008146	MF	sulfotransferase activity	Novel2668, Novel4396, Vc11a301.19, Vc14s361.47, Vc18s223.24, Vc22a89.30, Vc22a89.31, Vc26a179.20, Vc29s172.30, Vc32a290.39, Vc33a170.17, Vc35p253.1, Vc36p97.1, Vc3s7.44, Vc4p345.6, Vc4p346.1, Vc7s254.22, Vc9p321.4	18	9109	22	52010	0.8182	8.40954e-11	****	3.31455e-09	****	Se vs Sa		GO:0106286	MF
100	GO:0140825	MF	lactoperoxidase activity	Vc10s232.19, Vc14s322.43, Vc1s45.29, Vc21a112.20, Vc21a112.21, Vc29a112.21, Vc2a320.20, Vc2s372.43, Vc33a226.20, Vc37a166.16, Vc3a84.40, Vc3p36.24, Vc5a165.13, Vc60a3.27, Vc8a248.21	15	1861	75	52010	0.2	5.76007e-08	****	8.34302e-07	****	Ex vs Sa		100	GO:0009751	BP	response to salicylic acid	Novel1996, Novel4490, Vc1139p0.1, Vc16a144.17, Vc16a95.34, Vc18a258.26, Vc1s138.31, Vc20a121.20, Vc21a6.39, Vc22s52.23, Vc23p119.24, Vc27a261.27, Vc28a226.19, Vc31p58.9, Vc31s56.26, Vc32a98.23, Vc32s46.47, Vc33a314.24, Vc34p141.22, Vc35a274.32, Vc35s62.37, Vc36a201.19, Vc36a294.22, Vc39s285.26, Vc40a267.47, Vc42a199.39, Vc4a152.33, Vc4p252.16, Vc4s377.47, Vc5a126.29, Vc6s23.44, Vc795a0.11, Vc7a28…	36	7813	68	52010	0.5294	3.5803e-13	****	1.24451e-11	****	Ex vs Se		100	GO:0015979	BP	photosynthesis	Vc10a139.26, Vc10a174.12, Vc10p343.0, Vc11a224.39, Vc11a259.34, Vc11a360.27, Vc11p371.17, Vc14s185.45, Vc15a364.29, Vc15s330.54, Vc17a112.27, Vc17s16.50, Vc19a283.11, Vc19a37.38, Vc19p374.13, Vc1a258.34, Vc1p328.2, Vc1p460.22, Vc1p68.5, Vc207p1.1, Vc20a37.42, Vc214s0.37, Vc22a290.27, Vc22p7.6, Vc24a130.34, Vc24a31.44, Vc24a41.40, Vc24p167.9, Vc27a74.17, Vc28s319.35, Vc2a154.23, Vc2a226.26, Vc32a5…	59	9109	147	52010	0.4014	9.04023e-11	****	3.5275e-09	****	Se vs Sa		GO:0140825	MF
101	GO:0034081	CC	polyketide synthase complex	Novel4416, Vc13a46.32, Vc30a303.29, Vc32a318.21, Vc42a14.30	5	1861	5	52010	1	5.83506e-08	****	8.34302e-07	****	Ex vs Sa		101	GO:0051287	MF	NAD binding	Vc10s38.38, Vc12a13.29, Vc1335p0.1, Vc1397a0.2, Vc139a1.25, Vc16a0.19, Vc16a13.35, Vc16a13.36, Vc16a26.46, Vc16p5.1, Vc17a93.20, Vc187a1.54, Vc18a360.34, Vc18a360.35, Vc18a376.35, Vc18s382.86, Vc21a106.20, Vc224s1.40, Vc22a368.31, Vc22s26.56, Vc22s92.38, Vc23a362.41, Vc23a40.20, Vc25a287.27, Vc25s256.50, Vc26a0.15, Vc27a54.30, Vc2a245.40, Vc2p291.1, Vc30s68.47, Vc33a316.14, Vc33a324.17, Vc33a38.2…	67	7813	182	52010	0.3681	4.02886e-13	****	1.38657e-11	****	Ex vs Se		101	GO:0051762	BP	sesquiterpene biosynthetic process	Vc12s106.30, Vc13a136.41, Vc13a136.42, Vc13a138.30, Vc13p8.4, Vc15a239.39, Vc16a366.33, Vc17a387.47, Vc19a286.27, Vc20s242.26, Vc211a0.22, Vc211a0.23, Vc22a197.17, Vc24s148.64, Vc25s105.21, Vc27a337.39, Vc28p114.1, Vc30a161.25, Vc30a169.20, Vc30a229.25, Vc30p264.5, Vc32a151.27, Vc32a159.26, Vc32a205.18, Vc32a321.25, Vc33a270.23, Vc34a8.24, Vc34a9.26, Vc35p272.23, Vc41a34.48, Vc41s56.46, Vc42a90.1…	38	9109	76	52010	0.5	9.80445e-11	****	3.78782e-09	****	Se vs Sa		GO:0034081	CC
102	GO:0042181	BP	ketone biosynthetic process	Novel4416, Vc13a46.32, Vc30a303.29, Vc32a318.21, Vc42a14.30	5	1861	5	52010	1	5.83506e-08	****	8.34302e-07	****	Ex vs Sa		102	GO:0005829	CC	cytosol	Novel1996, Novel4248, Novel5402, Vc10a105.22, Vc10a11.27, Vc10a125.29, Vc10a208.28, Vc10a249.13, Vc10a26.18, Vc10a30.27, Vc10a373.30, Vc10p388.3, Vc10s232.19, Vc10s377.34, Vc10s385.53, Vc11a214.24, Vc11a233.23, Vc11a242.24, Vc11a362.41, Vc11p32.6, Vc11p335.2, Vc11p335.5, Vc11p349.6, Vc11p90.11, Vc11s221.30, Vc11s256.39, Vc11s372.31, Vc120a3.48, Vc12a129.12, Vc12a254.22, Vc12a270.28, Vc12a44.31, V…	420	7813	2018	52010	0.2081	7.16294e-13	****	2.44102e-11	****	Ex vs Se		102	GO:0140662	MF	ATP-dependent protein folding chaperone	Vc106a4.43, Vc1081a0.8, Vc11a232.27, Vc11p330.36, Vc11s329.68, Vc11s329.75, Vc136a1.27, Vc14a307.32, Vc157a2.45, Vc15p320.2, Vc16a288.25, Vc16p293.20, Vc17s144.15, Vc18s120.45, Vc199p0.5, Vc19s348.58, Vc20a370.22, Vc20s9.44, Vc21a152.24, Vc21a51.38, Vc22a115.30, Vc22a256.40, Vc24a161.24, Vc24a84.33, Vc25a357.28, Vc25p281.2, Vc26a155.35, Vc26a52.34, Vc27a35.20, Vc29a52.36, Vc29p153.14, Vc2a360.27,…	66	9109	173	52010	0.3815	9.98794e-11	****	3.81045e-09	****	Se vs Sa		GO:0042181	BP
103	GO:1901696	BP	cannabinoid biosynthetic process	Novel4416, Vc13a46.32, Vc30a303.29, Vc32a318.21, Vc42a14.30	5	1861	5	52010	1	5.83506e-08	****	8.34302e-07	****	Ex vs Sa		103	GO:0009765	BP	photosynthesis, light harvesting	Vc10a40.33, Vc10a52.41, Vc11p117.3, Vc14s167.34, Vc14s323.44, Vc15s113.27, Vc17a80.31, Vc19p195.7, Vc1a388.23, Vc24p288.4, Vc25s185.32, Vc2s374.37, Vc34a269.38, Vc3a229.23, Vc3a34.35, Vc48a58.36, Vc5a366.38, Vc5a379.32, Vc5a402.29, Vc5p367.0, Vc8a28.24, Vc8a48.30, Vc8a64.34, Vc9a227.31, Vc9s333.29	25	7813	37	52010	0.6757	7.28418e-13	****	2.45823e-11	****	Ex vs Se		103	GO:0003924	MF	GTPase activity	Novel2977, Vc105p3.8, Vc10a371.21, Vc10a39.34, Vc10s366.34, Vc11a245.18, Vc11a350.33, Vc11p339.11, Vc11p379.0, Vc11s332.29, Vc11s378.35, Vc12a254.22, Vc12a262.18, Vc12p334.8, Vc130a2.41, Vc130a3.45, Vc131a3.40, Vc132p0.16, Vc147a1.25, Vc14a121.25, Vc14a223.28, Vc14a283.33, Vc15a317.37, Vc15a322.22, Vc15p329.28, Vc15p371.13, Vc15s370.36, Vc16a141.18, Vc16a16.38, Vc16a375.27, Vc16a381.41, Vc17a17.1…	161	9109	568	52010	0.2835	1.00583e-10	****	3.81045e-09	****	Se vs Sa		GO:1901696	BP
104	GO:0048766	BP	root hair initiation	Vc11a269.29, Vc15a255.20, Vc19a301.22, Vc19a303.28, Vc24a130.35	5	1861	5	52010	1	5.83506e-08	****	8.34302e-07	****	Ex vs Sa		104	GO:0009664	BP	plant-type cell wall organization	Vc11a314.24, Vc11a333.39, Vc15a323.36, Vc15s301.23, Vc16p65.2, Vc17a52.13, Vc18a331.22, Vc19a32.35, Vc19a351.33, Vc19p32.2, Vc19p50.5, Vc19s32.42, Vc19s372.36, Vc20a33.37, Vc20a50.33, Vc20p54.3, Vc26a108.32, Vc27a32.20, Vc28a303.45, Vc28a324.47, Vc28a324.50, Vc29a109.28, Vc2s394.48, Vc33a230.29, Vc34s309.25, Vc501p0.9, Vc7a359.21	27	7813	43	52010	0.6279	1.24911e-12	****	4.1749e-11	****	Ex vs Se		104	GO:0008652	BP	amino acid biosynthetic process	Novel0824, Novel4218, Vc12a123.23, Vc12p239.1, Vc13a14.23, Vc16a328.28, Vc16a67.37, Vc16p232.2, Vc18s329.39, Vc19s62.29, Vc22a39.37, Vc23a128.29, Vc23a252.31, Vc23p119.12, Vc23s291.23, Vc28s293.33, Vc28s70.33, Vc30a270.32, Vc31a173.13, Vc31s275.28, Vc34a235.26, Vc40a50.23, Vc40p75.7, Vc41a65.20, Vc41s18.19, Vc42a46.35, Vc42s22.29, Vc48s57.36, Vc612a0.9, Vc7a357.32, Vc7p146.2, Vc7p79.3	32	9109	58	52010	0.5517	1.05812e-10	****	3.96997e-09	****	Se vs Sa		GO:0048766	BP
105	GO:0009416	BP	response to light stimulus	Novel0883, Vc13p97.14, Vc17a317.37, Vc17a80.31, Vc19s130.30, Vc1a398.30, Vc20a269.18, Vc20a60.39, Vc20p93.7, Vc22a291.37, Vc27a283.20, Vc28p268.22, Vc2a302.39, Vc2p214.1, Vc34a269.38, Vc503p0.5, Vc5a375.25, Vc5a402.29, Vc7a342.29, Vc8a28.24, Vc8a52.29	21	1861	147	52010	0.1429	7.24919e-08	****	1.02662e-06	****	Ex vs Sa		105	GO:0072330	BP	monocarboxylic acid biosynthetic process	Vc10a128.22, Vc10a387.25, Vc11a233.23, Vc15a227.19, Vc160a2.34, Vc16a174.22, Vc18s145.24, Vc1a16.36, Vc1a302.27, Vc1p398.3, Vc21a150.23, Vc24a160.31, Vc24p122.11, Vc27p357.7, Vc29a151.24, Vc33a186.25, Vc38s101.15, Vc4a11.38, Vc4a3.28, Vc4p32.6, Vc5a14.25, Vc5a281.31, Vc5p375.4, Vc6a422.25, Vc7a143.23, Vc8a147.18, Vc8a398.26, Vc9s3.42	28	7813	46	52010	0.6087	1.45183e-12	****	4.80626e-11	****	Ex vs Se		105	GO:0009506	CC	plasmodesma	Vc112p1.10, Vc11a307.39, Vc11p90.11, Vc120a0.27, Vc120a3.48, Vc12a12.37, Vc12a254.22, Vc145a0.34, Vc14a256.31, Vc14a371.36, Vc14a372.28, Vc15a159.14, Vc15s385.43, Vc16a350.21, Vc17a154.18, Vc17a22.22, Vc19a24.38, Vc19a346.40, Vc19a363.26, Vc19a78.32, Vc19s268.54, Vc23a180.38, Vc23p127.6, Vc23s108.36, Vc24a176.42, Vc24a87.25, Vc24s214.30, Vc25a100.22, Vc25a286.23, Vc25a307.30, Vc25a310.42, Vc25p33…	80	9109	227	52010	0.3524	1.14383e-10	****	4.2507e-09	****	Se vs Sa		GO:0009416	BP
106	GO:0016628	MF	oxidoreductase activity, acting on the CH-CH group of donors, NAD or NADP as acceptor	Vc10a60.41, Vc12p138.6, Vc12s139.44, Vc1a367.18, Vc32a296.18, Vc40a63.31, Vc40a63.32, Vc41s3.38, Vc5a346.33, Vc8a88.14	10	1861	31	52010	0.3226	7.48475e-08	****	1.04998e-06	****	Ex vs Sa		106	GO:0016168	MF	chlorophyll binding	Vc10a40.33, Vc10a52.41, Vc11p117.3, Vc14s167.34, Vc14s323.44, Vc15s113.27, Vc17a80.31, Vc19p195.7, Vc1a388.23, Vc24p288.4, Vc25s185.32, Vc2s374.37, Vc34a269.38, Vc3a229.23, Vc3a34.35, Vc48a58.36, Vc5a366.38, Vc5a379.32, Vc5a402.29, Vc5p367.0, Vc8a28.24, Vc8a48.30, Vc8a64.34, Vc9a227.31, Vc9s333.29	25	7813	38	52010	0.6579	1.82342e-12	****	5.97943e-11	****	Ex vs Se		106	GO:0006351	BP	DNA-templated transcription	Novel1370, Vc11a354.42, Vc11s282.27, Vc12s139.41, Vc12s353.27, Vc13a111.16, Vc1414p0.1, Vc15a266.29, Vc15p249.5, Vc16a318.35, Vc16a88.14, Vc16p194.7, Vc17s44.41, Vc18a83.29, Vc18p209.20, Vc19a107.19, Vc19s313.32, Vc20a104.15, Vc20a289.19, Vc20a374.28, Vc21a363.31, Vc22a238.25, Vc22s103.35, Vc22s129.19, Vc22s192.24, Vc23s272.32, Vc248a0.46, Vc24p260.3, Vc24s118.41, Vc25a350.25, Vc26p350.1, Vc26s19…	78	9109	220	52010	0.3545	1.39557e-10	****	5.13728e-09	****	Se vs Sa		GO:0016628	MF
107	GO:0009820	BP	alkaloid metabolic process	Novel0044, Vc10p338.6, Vc11a306.33, Vc11p246.8, Vc15a291.31, Vc15a58.22, Vc15p242.0, Vc15p243.0, Vc16a352.18, Vc18s44.37, Vc19a153.16, Vc19a337.39, Vc19a63.31, Vc19p288.0, Vc19p289.3, Vc20a374.29, Vc20a66.37, Vc21p326.1, Vc22a109.15, Vc22p160.2, Vc24a326.22, Vc24a95.32, Vc28a292.36, Vc28p2.18, Vc30a321.23, Vc3p108.0, Vc46p41.0, Vc48a57.29	28	1861	245	52010	0.1143	7.58084e-08	****	1.05352e-06	****	Ex vs Sa		107	GO:0006096	BP	glycolytic process	Novel5013, Vc10a208.28, Vc10a209.25, Vc13s219.23, Vc14a185.28, Vc14a382.32, Vc16a0.19, Vc17a3.20, Vc17p11.5, Vc18s382.86, Vc19s12.31, Vc1a199.30, Vc1a201.20, Vc20a376.23, Vc21a331.44, Vc21s80.35, Vc23a347.25, Vc25a279.24, Vc25s256.50, Vc26a1.31, Vc26a153.15, Vc26a322.40, Vc26a78.21, Vc27a2.18, Vc27p10.1, Vc29a151.22, Vc29a80.30, Vc29s310.48, Vc2a174.15, Vc2a226.19, Vc2a245.40, Vc2a267.39, Vc2a436…	61	7813	164	52010	0.372	2.63594e-12	****	8.5631e-11	****	Ex vs Se		107	GO:0008289	MF	lipid binding	Novel0761, Vc10a249.13, Vc10a317.18, Vc11a199.24, Vc12s361.42, Vc13p390.6, Vc14a178.26, Vc14p42.4, Vc151p2.37, Vc15a192.30, Vc188a1.58, Vc18a14.24, Vc19a265.20, Vc1a96.22, Vc20a213.21, Vc20s291.21, Vc21s65.59, Vc22a27.16, Vc22p146.0, Vc24a179.19, Vc25p41.0, Vc26a179.20, Vc26a29.34, Vc28a1.25, Vc28a136.10, Vc28a82.25, Vc29a66.49, Vc29s172.30, Vc2a351.33, Vc2s58.20, Vc30a258.32, Vc31s326.42, Vc33a1…	67	9109	178	52010	0.3764	1.43484e-10	****	5.23247e-09	****	Se vs Sa		GO:0009820	BP
108	GO:0003854	MF	3-beta-hydroxy-delta5-steroid dehydrogenase activity	Vc13a67.37, Vc14a46.20, Vc25a44.25, Vc26a16.35, Vc29a16.15, Vc2a63.19, Vc30a338.22, Vc32a297.40, Vc33p299.18, Vc3a382.28	10	1861	32	52010	0.3125	1.05366e-07	****	1.43817e-06	****	Ex vs Sa		108	GO:0047274	MF	galactinol-sucrose galactosyltransferase activity	Vc10a136.27, Vc10a137.20, Vc11a394.26, Vc16a19.20, Vc16p36.1, Vc18a367.20, Vc1a293.20, Vc24a3.27, Vc38s44.21, Vc39a40.28, Vc51a4.27, Vc5a273.13, Vc6s374.24, Vc7p394.1	14	7813	14	52010	1	2.95075e-12	****	9.49704e-11	****	Ex vs Se		108	GO:0008017	MF	microtubule binding	Vc1088p0.4, Vc10a2.36, Vc10a316.34, Vc10a80.27, Vc13a287.20, Vc13s285.50, Vc14a121.25, Vc1a31.30, Vc1a444.28, Vc1p417.8, Vc20a161.24, Vc20a331.39, Vc21p266.4, Vc21s326.34, Vc22a117.29, Vc22a135.25, Vc23s179.23, Vc25s139.16, Vc26a256.29, Vc26a273.29, Vc28a163.24, Vc28s69.20, Vc29s305.37, Vc2s96.26, Vc30a108.31, Vc30a112.38, Vc30a113.20, Vc31s37.24, Vc32a99.28, Vc33a60.26, Vc33s77.32, Vc34p35.15, V…	57	9109	142	52010	0.4014	1.85444e-10	****	6.70003e-09	****	Se vs Sa		GO:0003854	MF
109	GO:0016872	MF	intramolecular lyase activity	Vc16p23.9, Vc18a373.31, Vc21a108.29, Vc26a107.28, Vc29a108.20, Vc33a231.26, Vc7s397.42	7	1861	13	52010	0.5385	1.0542e-07	****	1.43817e-06	****	Ex vs Sa		109	GO:0006508	BP	proteolysis	Novel0132, Novel0180, Novel1719, Novel2156, Novel2971, Novel3162, Novel3465, Novel4039, Novel4239, Novel5120, Novel5415, Vc10p44.8, Vc10s181.40, Vc1127a0.6, Vc119s3.55, Vc11a240.22, Vc11a399.36, Vc1215a0.4, Vc12a100.16, Vc12a143.33, Vc12a40.49, Vc12a60.43, Vc12s332.36, Vc12s7.46, Vc1393p0.0, Vc1393p0.1, Vc13a282.24, Vc13a83.25, Vc13s37.51, Vc14a274.20, Vc14a288.29, Vc14a69.29, Vc14s274.29, Vc153p…	222	7813	945	52010	0.2349	3.11966e-12	****	9.94858e-11	****	Ex vs Se		109	GO:0005743	CC	mitochondrial inner membrane	Vc10p177.14, Vc117a2.46, Vc11a42.14, Vc11s256.39, Vc124a3.48, Vc12s114.36, Vc13a49.38, Vc13a59.47, Vc13p47.9, Vc13s159.19, Vc15a158.19, Vc15a334.27, Vc15a48.15, Vc16a364.34, Vc17a320.36, Vc17a51.19, Vc18a264.27, Vc18a33.33, Vc19a142.16, Vc19a2.41, Vc19a91.43, Vc1s424.61, Vc21a186.26, Vc21a50.41, Vc21a7.18, Vc22a368.31, Vc22p242.7, Vc23a336.23, Vc24a215.15, Vc25p111.10, Vc26a4.26, Vc26p187.6, Vc29…	79	9109	227	52010	0.348	2.96193e-10	****	1.06032e-08	****	Se vs Sa		GO:0016872	MF
110	GO:0009699	BP	phenylpropanoid biosynthetic process	Vc11p17.1, Vc13a238.27, Vc13a46.32, Vc1466a0.2, Vc14a252.26, Vc22s81.46, Vc29p159.19, Vc30a161.25, Vc30a303.29, Vc32a159.26, Vc32a318.21, Vc42a14.30, Vc42a154.36	13	1861	59	52010	0.2203	1.31617e-07	****	1.77922e-06	****	Ex vs Sa		110	GO:0006979	BP	response to oxidative stress	Novel1225, Novel4416, Vc10a356.15, Vc12p138.6, Vc12s139.44, Vc13a46.32, Vc14a287.24, Vc14a323.40, Vc14s392.31, Vc16a42.29, Vc17a163.18, Vc17a163.19, Vc17a22.22, Vc18a14.24, Vc19a2.41, Vc19a24.33, Vc19a269.28, Vc19a37.38, Vc1a20.24, Vc1a293.20, Vc1a49.22, Vc20a37.42, Vc20s371.37, Vc214s0.37, Vc21a112.20, Vc21a112.21, Vc22a311.33, Vc23a246.14, Vc25a295.23, Vc25a314.55, Vc25a316.26, Vc25a331.33, Vc2…	82	7813	254	52010	0.3228	3.78176e-12	****	1.19504e-10	****	Ex vs Se		110	GO:0009755	BP	hormone-mediated signaling pathway	Novel0103, Novel0763, Vc10s48.32, Vc1233s0.10, Vc1249a0.3, Vc13p108.1, Vc14a133.25, Vc14p381.8, Vc15a382.31, Vc16a127.36, Vc18a267.24, Vc20a355.33, Vc21a85.21, Vc22a36.36, Vc23p24.1, Vc25s232.25, Vc26s82.33, Vc28a23.21, Vc28s142.27, Vc29a84.20, Vc29p262.23, Vc2p434.8, Vc31a38.18, Vc33a254.25, Vc34p141.22, Vc35a262.27, Vc36a224.35, Vc36a235.33, Vc38a288.36, Vc39s102.29, Vc40s32.49, Vc4a354.32, Vc4…	41	9109	88	52010	0.4659	3.00129e-10	****	1.06464e-08	****	Se vs Sa		GO:0009699	BP
111	GO:0046283	BP	anthocyanin-containing compound metabolic process	Novel3202, Vc14s354.49, Vc1a316.27, Vc20a68.33, Vc20a68.35, Vc28a290.34, Vc32p295.2, Vc36p225.11, Vc36p225.9, Vc36s226.33, Vc37a300.34, Vc39p2.0, Vc48p74.12, Vc48s55.35, Vc4p123.16, Vc552s0.9	16	1861	91	52010	0.1758	1.39802e-07	****	1.84998e-06	****	Ex vs Sa		111	GO:0035672	BP	oligopeptide transmembrane transport	Vc120a3.48, Vc1295a0.3, Vc145a0.34, Vc17s213.35, Vc20a373.32, Vc24a176.42, Vc24s174.19, Vc26a31.32, Vc27a195.32, Vc28a3.33, Vc29a28.29, Vc29a29.27, Vc30a295.37, Vc32s325.55, Vc33a287.37, Vc35s74.41, Vc41a250.32, Vc45a195.23, Vc742a0.11, Vc742a0.12, Vc7a411.26, Vc86a5.56, Vc86s4.45	23	7813	34	52010	0.6765	5.88757e-12	****	1.8384e-10	****	Ex vs Se		111	GO:0005459	MF	UDP-galactose transmembrane transporter activity	Vc13a252.24, Vc13a7.23, Vc14a274.20, Vc14s141.21, Vc21a317.34, Vc25a219.17, Vc25a317.25, Vc26a309.28, Vc29a297.28, Vc2s192.39, Vc30a150.47, Vc30a263.27, Vc32a142.28, Vc37a110.25, Vc37s125.15, Vc3a249.22, Vc3a84.39, Vc42a54.34	18	9109	23	52010	0.7826	3.22899e-10	****	1.13509e-08	****	Se vs Sa		GO:0046283	BP
112	GO:0033612	MF	receptor serine/threonine kinase binding	Novel5248, Vc12a107.49, Vc14a133.25, Vc151a2.48, Vc23a305.41, Vc2a176.15, Vc2s393.39, Vc35p273.6, Vc36p52.5, Vc372s0.22, Vc40a54.33	11	1861	41	52010	0.2683	1.40259e-07	****	1.84998e-06	****	Ex vs Sa		112	GO:0006032	BP	chitin catabolic process	Vc12a10.30, Vc12a37.34, Vc12a382.41, Vc12p382.8, Vc23p16.4, Vc23s17.40, Vc25a163.31, Vc25a163.32, Vc25a163.34, Vc25a163.35, Vc30s82.54, Vc32s66.30, Vc35a54.42, Vc36a216.26, Vc39p25.5, Vc41a264.29, Vc41p264.23, Vc42a213.43, Vc53a15.50, Vc53a15.52, Vc53p15.32, Vc583a0.14, Vc6a389.35, Vc6a389.36, Vc6p389.6, Vc6s3.36, Vc9a90.20	27	7813	45	52010	0.6	5.92349e-12	****	1.8384e-10	****	Ex vs Se		112	GO:0004175	MF	endopeptidase activity	Vc12a100.16, Vc12a60.43, Vc13a282.24, Vc15s391.62, Vc16a164.21, Vc18a6.28, Vc19a68.53, Vc20a72.60, Vc21a303.25, Vc21s15.41, Vc26a296.32, Vc28a286.23, Vc29a282.23, Vc29s10.40, Vc31a76.17, Vc32a93.23, Vc33a305.26, Vc40a30.26, Vc41p39.24, Vc41p41.22, Vc42p195.3, Vc48a48.25, Vc4s218.31, Vc7a20.26, Vc7a268.16, Vc801p0.0	26	9109	43	52010	0.6047	3.82657e-10	****	1.33315e-08	****	Se vs Sa		GO:0033612	MF
113	GO:0009404	BP	toxin metabolic process	Novel5402, Vc1743a0.5, Vc1a116.49, Vc2a270.34, Vc2p269.6, Vc34a252.24, Vc3a167.39, Vc94a1.35	8	1861	19	52010	0.4211	1.40583e-07	****	1.84998e-06	****	Ex vs Sa		113	GO:1990961	BP	xenobiotic detoxification by transmembrane export across the plasma membrane	Vc11s112.24, Vc13p332.7, Vc14a186.29, Vc14p264.18, Vc15a107.18, Vc19s200.30, Vc20s143.34, Vc21p311.0, Vc24a293.28, Vc24a293.29, Vc26s304.43, Vc26s305.50, Vc28a334.35, Vc28s206.51, Vc29p292.3, Vc2p302.22, Vc35s82.35, Vc36s112.31, Vc37p241.9, Vc38a171.30, Vc38p71.5, Vc39p75.3, Vc3s104.28, Vc3s209.28, Vc42p254.2, Vc4a170.22, Vc4a293.24, Vc6p347.2, Vc9s122.24	29	7813	51	52010	0.5686	6.43334e-12	****	1.97896e-10	****	Ex vs Se		113	GO:0007165	BP	signal transduction	Novel5402, Vc10p119.3, Vc10p322.0, Vc10s399.42, Vc11a253.33, Vc11a315.22, Vc11a320.32, Vc11p322.26, Vc12a131.19, Vc12a374.24, Vc12s239.28, Vc136p3.2, Vc15a302.29, Vc16p293.20, Vc16s328.34, Vc1743a0.5, Vc176s1.80, Vc17a145.18, Vc17a327.28, Vc17a334.31, Vc17p9.0, Vc17s148.29, Vc18a338.26, Vc18a70.33, Vc19a371.25, Vc19p364.10, Vc1a201.20, Vc1a311.38, Vc1s1.32, Vc20a257.23, Vc20s256.34, Vc20s257.34, …	112	9109	364	52010	0.3077	4.21454e-10	****	1.45532e-08	****	Se vs Sa		GO:0009404	BP
114	GO:0042744	BP	hydrogen peroxide catabolic process	Vc10s232.19, Vc115a1.24, Vc14s322.43, Vc1s45.29, Vc21a112.20, Vc21a112.21, Vc29a112.21, Vc2a320.20, Vc2s372.43, Vc33a226.20, Vc37a166.16, Vc3a84.40, Vc3p36.24, Vc5a165.13, Vc5s42.39, Vc60a3.27, Vc8a248.21	17	1861	103	52010	0.165	1.49601e-07	****	1.95138e-06	****	Ex vs Sa		114	GO:0009705	CC	plant-type vacuole membrane	Novel4416, Vc11s112.24, Vc11s324.40, Vc1295a0.3, Vc13a46.32, Vc17a118.33, Vc17s200.26, Vc19a126.27, Vc19s363.30, Vc1s226.31, Vc20s123.32, Vc225a1.30, Vc22s29.30, Vc26s22.45, Vc27a81.21, Vc27s178.18, Vc28a158.33, Vc28s223.24, Vc29s20.42, Vc30a303.29, Vc32a318.21, Vc33a295.32, Vc34a234.35, Vc350a0.26, Vc35p222.2, Vc35p301.2, Vc36a128.25, Vc36p21.9, Vc41a232.27, Vc42a14.30, Vc43s134.30, Vc44s159.26,…	41	7813	92	52010	0.4457	1.25946e-11	****	3.84026e-10	****	Ex vs Se		114	GO:0051287	MF	NAD binding	Vc10s38.38, Vc1326a0.7, Vc166a1.26, Vc16a13.35, Vc16a13.36, Vc17a93.20, Vc187a1.54, Vc18a360.34, Vc18a360.35, Vc18p324.3, Vc18s382.86, Vc1a187.26, Vc21a106.20, Vc224s1.40, Vc22a368.31, Vc22s26.56, Vc22s304.47, Vc23a40.20, Vc25a287.27, Vc25s256.50, Vc26a0.15, Vc27a54.30, Vc27p90.1, Vc27s214.38, Vc28s79.22, Vc2a245.40, Vc2p291.1, Vc33a316.14, Vc33a324.17, Vc34a25.19, Vc34a300.23, Vc35a177.13, Vc35a…	67	9109	182	52010	0.3681	4.34337e-10	****	1.48659e-08	****	Se vs Sa		GO:0042744	BP
115	GO:0030154	BP	cell differentiation	Vc13a112.29, Vc16a136.20, Vc21a177.35, Vc21a249.36, Vc23s296.31, Vc29a172.20, Vc29s235.27, Vc30a274.36, Vc31a48.13, Vc33a107.21, Vc33a170.18, Vc33a45.34, Vc37s143.27, Vc38s163.31, Vc39s168.25, Vc42s42.34, Vc43s92.35, Vc6s261.32, Vc7a300.25	19	1861	128	52010	0.1484	1.61749e-07	****	2.09148e-06	****	Ex vs Sa		115	GO:0035673	MF	oligopeptide transmembrane transporter activity	Vc120a3.48, Vc1295a0.3, Vc145a0.34, Vc17s213.35, Vc20a373.32, Vc24a176.42, Vc24s174.19, Vc26a31.32, Vc27a195.32, Vc28a3.33, Vc29a28.29, Vc29a29.27, Vc30a295.37, Vc32s325.55, Vc33a287.37, Vc35s74.41, Vc41a250.32, Vc45a195.23, Vc742a0.11, Vc742a0.12, Vc7a411.26, Vc86a5.56, Vc86s4.45	23	7813	35	52010	0.6571	1.47141e-11	****	4.44749e-10	****	Ex vs Se		115	GO:0030570	MF	pectate lyase activity	Vc14a101.15, Vc17a294.21, Vc26a193.36, Vc273a0.54, Vc27a261.28, Vc29a186.30, Vc2a79.23, Vc32a305.31, Vc33a157.19, Vc34a85.26, Vc34p320.10, Vc35a182.22, Vc36a172.20, Vc3a331.22, Vc4a280.24, Vc9s246.21	16	9109	19	52010	0.8421	4.38128e-10	****	1.48659e-08	****	Se vs Sa		GO:0030154	BP
116	GO:0004364	MF	glutathione transferase activity	Novel5402, Vc13a26.16, Vc1743a0.5, Vc1a116.48, Vc1a116.49, Vc24a11.46, Vc27a146.27, Vc2a269.40, Vc2a270.34, Vc2p269.6, Vc30a282.25, Vc34a252.24, Vc3a167.35, Vc3a167.39, Vc3p167.17, Vc42a34.23, Vc94a1.35	17	1861	104	52010	0.1635	1.72898e-07	****	2.21638e-06	****	Ex vs Sa		116	GO:0009074	BP	aromatic amino acid family catabolic process	Vc10a222.29, Vc10a222.30, Vc10p225.6, Vc11p299.22, Vc15a283.32, Vc19a331.32, Vc1a185.22, Vc1a186.19, Vc1a187.25, Vc24a101.15, Vc26a180.26, Vc29a173.18, Vc33a169.12, Vc5a235.33, Vc5s236.31, Vc5s236.34, Vc8a235.20, Vc8a235.22, Vc8a236.15	19	7813	25	52010	0.76	1.57806e-11	****	4.69715e-10	****	Ex vs Se		116	GO:0000287	MF	magnesium ion binding	Novel0824, Novel4218, Vc10a209.25, Vc10s243.33, Vc10s366.34, Vc11a364.40, Vc11s332.29, Vc12s106.30, Vc13s219.23, Vc14s310.32, Vc1541a0.2, Vc15a322.22, Vc15a369.30, Vc16a375.27, Vc17a93.20, Vc17s45.37, Vc17s73.32, Vc18a20.24, Vc18p147.3, Vc18s339.45, Vc19a379.34, Vc1a187.26, Vc1a199.30, Vc1a236.25, Vc1s168.29, Vc21s80.35, Vc22a119.33, Vc22a310.49, Vc22s170.32, Vc23a40.20, Vc24a26.32, Vc24a38.29, V…	91	9109	277	52010	0.3285	4.51155e-10	****	1.51759e-08	****	Se vs Sa		GO:0004364	MF
117	GO:0003878	MF	ATP citrate synthase activity	Vc35s201.18, Vc36p156.4, Vc4a11.38, Vc4a3.28, Vc4p32.6, Vc4s297.30, Vc9s266.31, Vc9s3.42	8	1861	20	52010	0.4	2.26917e-07	****	2.88398e-06	****	Ex vs Sa		117	GO:1901576	BP	organic substance biosynthetic process	Vc10a110.29, Vc10a23.16, Vc10a323.26, Vc10p81.9, Vc117s3.75, Vc13p136.9, Vc14p329.0, Vc15s360.57, Vc17p14.18, Vc17p295.3, Vc1a330.28, Vc1p421.3, Vc1s320.35, Vc20a0.22, Vc21a333.57, Vc21s269.49, Vc22s90.42, Vc23s19.46, Vc23s239.28, Vc241a0.41, Vc27s13.36, Vc28a334.35, Vc2a379.38, Vc30a227.22, Vc30p229.6, Vc32p234.3, Vc34p84.6, Vc37a75.26, Vc37a81.25, Vc38a200.23, Vc38a291.15, Vc39a226.23, Vc39a272…	51	7813	130	52010	0.3923	1.58103e-11	****	4.69715e-10	****	Ex vs Se		117	GO:0042744	BP	hydrogen peroxide catabolic process	Vc10a336.34, Vc10s232.19, Vc115a1.24, Vc11p309.17, Vc12s17.25, Vc12s29.38, Vc13s302.30, Vc14s322.43, Vc14s362.36, Vc15a294.29, Vc16a42.29, Vc18a356.36, Vc1a74.31, Vc1s176.37, Vc1s45.29, Vc23s365.35, Vc24p92.1, Vc25a316.26, Vc26a26.19, Vc29p233.16, Vc2a320.20, Vc2s372.43, Vc31a333.18, Vc32a257.23, Vc32s76.26, Vc33p109.3, Vc33p43.4, Vc34s170.22, Vc35a117.34, Vc37a166.16, Vc39s195.45, Vc3p36.24, Vc3…	45	9109	103	52010	0.4369	5.77637e-10	****	1.92644e-08	****	Se vs Sa		GO:0003878	MF
118	GO:0051707	BP	response to other organism	Vc103a1.29, Vc133a2.18, Vc16a357.36, Vc16p172.0, Vc16s358.37, Vc1p428.27, Vc1s428.50, Vc22p126.3, Vc24s205.89, Vc27a97.27, Vc28a32.43, Vc2a405.43, Vc2p257.0, Vc33s98.25, Vc35a94.33, Vc39a34.40, Vc3p179.2, Vc40a263.28, Vc44a24.31, Vc5s13.27, Vc7a262.25, Vc7s371.58, Vc8a22.29, Vc8s400.32	24	1861	201	52010	0.1194	2.79794e-07	****	3.52588e-06	****	Ex vs Sa		118	GO:0044550	BP	secondary metabolite biosynthetic process	Novel4416, Vc11a345.31, Vc12a80.32, Vc13a136.42, Vc14a192.34, Vc15a239.39, Vc15s334.29, Vc18s48.44, Vc211a0.22, Vc211a0.23, Vc22a197.17, Vc23a330.25, Vc24a56.29, Vc2a379.38, Vc2p288.0, Vc2s399.76, Vc30a169.20, Vc32a151.27, Vc36a54.44, Vc3a203.34, Vc3a29.38, Vc40a12.24, Vc41a202.24, Vc41a59.21, Vc41p59.2, Vc43a171.21, Vc46p82.24, Vc47a139.30, Vc47a7.20, Vc544a0.21, Vc6a17.36, Vc8a79.42	32	7813	62	52010	0.5161	1.76769e-11	****	5.16343e-10	****	Ex vs Se		118	GO:0009535	CC	chloroplast thylakoid membrane	Vc10a174.12, Vc10a40.33, Vc10p343.0, Vc11a360.27, Vc11p371.17, Vc12a356.30, Vc14s185.45, Vc14s323.44, Vc15a364.29, Vc15s113.27, Vc17a112.27, Vc191a1.55, Vc19a356.32, Vc19p195.7, Vc19p374.13, Vc1a258.34, Vc1a388.23, Vc1p398.3, Vc1p460.22, Vc1p68.5, Vc1s424.61, Vc207p1.1, Vc23a38.33, Vc24a31.44, Vc24a41.40, Vc24p288.4, Vc27a74.17, Vc28p17.19, Vc2a154.23, Vc2a226.26, Vc2p78.0, Vc2s374.37, Vc31p328.1…	62	9109	165	52010	0.3758	7.3862e-10	****	2.44245e-08	****	Se vs Sa		GO:0051707	BP
119	GO:0009836	BP	fruit ripening, climacteric	Novel0961, Vc11a145.15, Vc132a3.31, Vc14p357.28, Vc15a134.19, Vc17p329.4, Vc17p332.40, Vc21p54.4, Vc24a250.20, Vc26a56.34, Vc27s291.30, Vc29a55.29, Vc33a280.28	13	1861	63	52010	0.2063	2.97999e-07	****	3.72373e-06	****	Ex vs Sa		119	GO:0009809	BP	lignin biosynthetic process	Vc12p300.7, Vc13s341.30, Vc149s2.68, Vc14a183.19, Vc17a235.23, Vc17p329.4, Vc1a373.37, Vc20a5.31, Vc21a112.20, Vc21a112.21, Vc23p90.4, Vc27s291.30, Vc29a112.21, Vc30p58.9, Vc32p21.11, Vc33a226.20, Vc34s139.31, Vc374s0.33, Vc37a253.25, Vc37a254.28, Vc37a254.29, Vc37s211.34, Vc38a60.23, Vc3a213.23, Vc40p195.0, Vc42p262.6, Vc45s216.26, Vc48a105.37, Vc578s0.21, Vc6a364.11, Vc6s313.31, Vc7a307.20	32	7813	62	52010	0.5161	1.76769e-11	****	5.16343e-10	****	Ex vs Se		119	GO:0008643	BP	carbohydrate transport	Vc102a4.44, Vc1030p0.0, Vc10a255.15, Vc10s13.29, Vc115p2.20, Vc118p3.13, Vc13a252.24, Vc13a318.39, Vc13a7.23, Vc13s98.35, Vc146a2.57, Vc14a274.20, Vc14s141.21, Vc14s198.21, Vc15a375.33, Vc1696a0.2, Vc16a213.28, Vc16a390.30, Vc21a22.26, Vc21a317.34, Vc22s132.37, Vc23p169.3, Vc23p27.5, Vc23s85.40, Vc24a60.33, Vc25a219.17, Vc25a317.25, Vc26a18.34, Vc26a309.28, Vc29a17.49, Vc29a297.28, Vc2s192.39, Vc…	56	9109	143	52010	0.3916	8.03194e-10	****	2.63367e-08	****	Se vs Sa		GO:0009836	BP
120	GO:0006865	BP	amino acid transport	Vc10p40.9, Vc16a1.31, Vc19a43.41, Vc19a45.34, Vc1a403.29, Vc1a459.29, Vc20s44.62, Vc23p356.19, Vc26s184.18, Vc2a200.31, Vc2a443.35, Vc33p135.7, Vc33s165.33, Vc41a276.28, Vc5a380.28, Vc6a287.24, Vc7p0.0, Vc8p47.19	18	1861	121	52010	0.1488	3.28497e-07	****	4.07062e-06	****	Ex vs Sa		120	GO:0005874	CC	microtubule	Vc10a161.18, Vc10s377.34, Vc11a8.21, Vc12a300.32, Vc13a108.11, Vc13a78.32, Vc13s285.50, Vc15p329.28, Vc16a348.28, Vc16a381.41, Vc17a17.16, Vc17s221.33, Vc18a15.26, Vc18a48.38, Vc20a291.18, Vc21a78.15, Vc21p266.4, Vc22a117.29, Vc24s306.24, Vc26a256.29, Vc26s76.26, Vc28s81.28, Vc30a108.31, Vc30a113.20, Vc30a327.34, Vc31a295.31, Vc31a325.19, Vc31s37.24, Vc32a266.23, Vc32s287.27, Vc33a60.26, Vc34a256…	65	7813	188	52010	0.3457	2.23551e-11	****	6.47551e-10	****	Ex vs Se		120	GO:0045735	MF	nutrient reservoir activity	Vc10a149.15, Vc11a368.33, Vc19a62.27, Vc21a334.28, Vc22a272.27, Vc22a332.52, Vc22p332.1, Vc22p332.4, Vc28s293.31, Vc28s328.36, Vc32a17.19, Vc38a24.32, Vc3a40.37, Vc43a40.55, Vc43a44.44, Vc43p41.24, Vc46a167.31, Vc46a168.26, Vc46p167.5, Vc46p168.1, Vc46s167.42, Vc46s168.45, Vc47a159.40, Vc47p159.15, Vc47p159.4, Vc47s159.56, Vc47s159.63, Vc48a57.30, Vc5a261.18, Vc889p0.2, Vc8a164.21	31	9109	59	52010	0.5254	1.05264e-09	****	3.42283e-08	****	Se vs Sa		GO:0006865	BP
121	GO:0009629	BP	response to gravity	Novel4416, Vc13a46.32, Vc30a303.29, Vc32a318.21, Vc42a14.30	5	1861	6	52010	0.8333	3.39691e-07	****	4.07356e-06	****	Ex vs Sa		121	GO:0106310	MF	protein serine kinase activity	Vc103a1.29, Vc10a334.32, Vc10p322.0, Vc10s399.42, Vc11a315.22, Vc133a2.18, Vc136p3.2, Vc13p7.3, Vc15a302.29, Vc17a327.28, Vc17a334.31, Vc17p9.0, Vc17s83.33, Vc19a371.25, Vc1a430.38, Vc1p428.27, Vc1p90.7, Vc1s1.32, Vc1s247.21, Vc1s326.44, Vc1s428.50, Vc1s77.31, Vc22a16.35, Vc22p126.3, Vc23s281.22, Vc23s283.13, Vc23s309.41, Vc24a311.20, Vc24a61.37, Vc24p196.2, Vc24s205.89, Vc24s209.34, Vc25a307.30,…	71	7813	214	52010	0.3318	2.47254e-11	****	7.10293e-10	****	Ex vs Se		121	GO:0000278	BP	mitotic cell cycle	Vc10a121.22, Vc10a345.26, Vc11a245.18, Vc11a8.21, Vc11p339.11, Vc13a108.11, Vc13a78.32, Vc15p329.28, Vc16a348.28, Vc16a381.41, Vc17a17.16, Vc17s221.33, Vc18a15.26, Vc18a48.38, Vc1a309.26, Vc20a291.18, Vc20a331.39, Vc20s322.41, Vc22a248.23, Vc24p75.4, Vc28s81.28, Vc30a327.34, Vc31a295.31, Vc31a325.19, Vc32a266.23, Vc32s287.27, Vc34a256.31, Vc34s153.29, Vc35a236.28, Vc44a240.22, Vc44a52.38, Vc44s76…	40	9109	88	52010	0.4545	1.22843e-09	****	3.96142e-08	****	Se vs Sa		GO:0009629	BP
122	GO:0102454	MF	cyanidin 3-O-galactosyltransferase activity	Vc20a68.33, Vc20a68.35, Vc28a290.34, Vc37a300.34, Vc39p2.0	5	1861	6	52010	0.8333	3.39691e-07	****	4.07356e-06	****	Ex vs Sa		122	GO:0120255	BP	olefinic compound biosynthetic process	Novel4416, Vc11a233.23, Vc13a46.32, Vc15a227.19, Vc160a2.34, Vc16a174.22, Vc18s145.24, Vc1p398.3, Vc24a160.31, Vc24p122.11, Vc30a303.29, Vc32a318.21, Vc38s101.15, Vc42a14.30, Vc5p375.4, Vc6a422.25, Vc7a143.23	17	7813	21	52010	0.8095	3.23599e-11	****	9.21993e-10	****	Ex vs Se		122	GO:0006979	BP	response to oxidative stress	Novel1225, Vc1006a0.7, Vc10a356.15, Vc10s394.22, Vc115a1.24, Vc12s17.25, Vc12s29.38, Vc14s322.43, Vc14s362.36, Vc16a42.29, Vc17a22.22, Vc18a14.24, Vc18a356.36, Vc18s158.28, Vc19a2.41, Vc19a24.33, Vc19a37.38, Vc19s94.36, Vc1a20.24, Vc1a293.20, Vc1a49.22, Vc1a7.44, Vc1s45.29, Vc20a37.42, Vc20s371.37, Vc214s0.37, Vc22s304.47, Vc23s365.35, Vc25a129.24, Vc25a295.23, Vc25a314.55, Vc25a316.26, Vc26a26.1…	84	9109	254	52010	0.3307	1.43659e-09	****	4.59472e-08	****	Se vs Sa		GO:0102454	MF
123	GO:0016866	MF	intramolecular transferase activity	Vc20s210.31, Vc21p224.11, Vc28s139.28, Vc29s213.42, Vc33a131.36	5	1861	6	52010	0.8333	3.39691e-07	****	4.07356e-06	****	Ex vs Sa		123	GO:0009805	BP	coumarin biosynthetic process	Novel0966, Novel2248, Vc11a145.15, Vc11s212.32, Vc1260a0.2, Vc15a134.19, Vc15s190.29, Vc15s205.28, Vc16a381.32, Vc17s337.47, Vc191s1.61, Vc1a373.37, Vc21p267.0, Vc22a131.24, Vc22a31.32, Vc24a250.20, Vc26a126.26, Vc28a184.20, Vc28a99.17, Vc29a124.18, Vc29a246.26, Vc2a400.29, Vc31a324.32, Vc33a278.40, Vc33a61.31, Vc33p213.10, Vc33p61.8, Vc33s291.32, Vc43p36.14, Vc44a180.34, Vc44a238.23, Vc46a11.23,…	40	7813	91	52010	0.4396	3.77334e-11	****	1.06635e-09	****	Ex vs Se		123	GO:0003680	MF	minor groove of adenine-thymine-rich DNA binding	Vc10p299.1, Vc12a32.39, Vc12p136.0, Vc16p340.2, Vc18p56.9, Vc19a24.35, Vc19p49.19, Vc1p105.10, Vc20a24.36, Vc20p49.1, Vc22a136.18, Vc22p172.5, Vc22s172.26, Vc23a363.30, Vc28p304.6, Vc28s331.48, Vc31p288.8, Vc40p60.5, Vc41p5.7, Vc43a198.27, Vc43a232.31, Vc43p198.2, Vc46a16.20, Vc46p53.3, Vc48s91.43, Vc7p67.5	26	9109	45	52010	0.5778	1.53579e-09	****	4.87206e-08	****	Se vs Sa		GO:0016866	MF
124	GO:0033897	MF	ribonuclease T2 activity	Vc22s307.39, Vc38a226.17, Vc43s69.35, Vc47s129.48, Vc6a138.21	5	1861	6	52010	0.8333	3.39691e-07	****	4.07356e-06	****	Ex vs Sa		124	GO:0042803	MF	protein homodimerization activity	Novel0763, Novel3539, Novel4416, Novel4811, Vc10a199.19, Vc11a259.41, Vc11s282.27, Vc13a46.32, Vc13p7.3, Vc13s70.42, Vc14a354.43, Vc14p50.7, Vc16a26.46, Vc16a350.21, Vc16a67.37, Vc16p232.2, Vc18a376.35, Vc18s329.39, Vc18s75.37, Vc19s313.32, Vc1a209.13, Vc21p261.1, Vc21s36.24, Vc22p173.7, Vc22s26.56, Vc23p62.21, Vc25a173.26, Vc26p250.19, Vc26p252.4, Vc26s37.44, Vc28s149.34, Vc29s37.23, Vc2a67.14, …	68	7813	203	52010	0.335	3.96899e-11	****	1.1126e-09	****	Ex vs Se		124	GO:0012505	CC	endomembrane system	Vc10a34.29, Vc10a39.34, Vc10s227.21, Vc11a301.19, Vc11a318.29, Vc11a350.33, Vc11a388.33, Vc11s329.68, Vc12a234.16, Vc12a286.31, Vc136a1.27, Vc13p40.9, Vc14a239.15, Vc14a286.20, Vc14a373.29, Vc15p320.2, Vc16s17.43, Vc16s290.29, Vc16s34.52, Vc17a248.18, Vc17s327.34, Vc18a14.24, Vc18a6.33, Vc19a346.40, Vc19a363.26, Vc19a8.38, Vc19s348.58, Vc1a403.30, Vc20a234.17, Vc20s10.37, Vc20s291.21, Vc20s322.41…	93	9109	292	52010	0.3185	1.77479e-09	****	5.58486e-08	****	Se vs Sa		GO:0033897	MF
125	GO:0009630	BP	gravitropism	Vc11a285.25, Vc15a269.38, Vc19a317.42, Vc20a163.20, Vc22a341.40, Vc24a115.17, Vc28a161.35, Vc43a31.37, Vc44a162.31	9	1861	28	52010	0.3214	3.51631e-07	****	4.183e-06	****	Ex vs Sa		125	GO:0042910	MF	xenobiotic transmembrane transporter activity	Vc11a111.24, Vc11s112.24, Vc13p332.7, Vc14a186.29, Vc14p264.18, Vc14s392.31, Vc15a107.18, Vc19s200.30, Vc20s143.34, Vc21p311.0, Vc24a293.28, Vc24a293.29, Vc26p304.17, Vc26s304.43, Vc26s305.50, Vc28a334.35, Vc28s206.51, Vc29p292.3, Vc2p302.22, Vc35s82.35, Vc36s112.31, Vc37p241.9, Vc37s216.40, Vc38a171.30, Vc38p71.5, Vc38s94.24, Vc39p75.3, Vc3s104.28, Vc3s209.28, Vc42p254.2, Vc48a94.39, Vc48a94.41,…	38	7813	84	52010	0.4524	4.02477e-11	****	1.11921e-09	****	Ex vs Se		125	GO:0009610	BP	response to symbiotic fungus	Novel2932, Novel4039, Vc10a199.19, Vc11p335.5, Vc13a118.26, Vc14a326.41, Vc17a387.48, Vc17p368.3, Vc1a209.13, Vc21p52.6, Vc23p303.0, Vc23s53.53, Vc26p75.3, Vc27a337.38, Vc27s332.32, Vc2p377.39, Vc30a252.34, Vc32a78.27, Vc33p281.6, Vc34a8.23, Vc34s1.31, Vc3a32.22, Vc40p38.6, Vc41p30.3, Vc42a214.39, Vc6a205.31, Vc6p77.4, Vc8a212.24	28	9109	51	52010	0.549	1.79532e-09	****	5.60428e-08	****	Se vs Sa		GO:0009630	BP
126	GO:0010025	BP	wax biosynthetic process	Vc13p97.14, Vc19s130.30, Vc2a302.39, Vc35s201.18, Vc36p156.4, Vc4s297.30, Vc9s266.31	7	1861	15	52010	0.4667	3.71125e-07	****	4.37986e-06	****	Ex vs Sa		126	GO:0030570	MF	pectate lyase activity	Vc14a101.15, Vc17a294.21, Vc17a42.24, Vc26a193.36, Vc27a261.28, Vc29a186.30, Vc2a79.23, Vc32a305.31, Vc33a157.19, Vc34a85.26, Vc34p320.10, Vc35a182.22, Vc36a172.20, Vc3a331.22, Vc4a280.24, Vc9s246.21	16	7813	19	52010	0.8421	4.07601e-11	****	1.12446e-09	****	Ex vs Se		126	GO:0009695	BP	jasmonic acid biosynthetic process	Vc12a78.41, Vc12s40.56, Vc16a95.34, Vc18a301.31, Vc20a121.20, Vc22a254.31, Vc23a332.35, Vc23a357.24, Vc25p172.0, Vc29a9.33, Vc2a77.22, Vc2a78.9, Vc31a5.28, Vc33s306.55, Vc3a332.27, Vc40s9.40, Vc41s61.32, Vc43a132.31, Vc46a86.22, Vc47a69.25, Vc7a329.31	21	9109	32	52010	0.6562	2.20473e-09	****	6.82768e-08	****	Se vs Sa		GO:0010025	BP
127	GO:0052716	MF	hydroquinone:oxygen oxidoreductase activity	Vc14a278.15, Vc17s19.29, Vc38s2.56, Vc3s79.31, Vc4a242.31, Vc9a152.13	6	1861	10	52010	0.6	3.86285e-07	****	4.48755e-06	****	Ex vs Sa		127	GO:0002238	BP	response to molecule of fungal origin	Novel0966, Novel2248, Vc11s212.32, Vc1260a0.2, Vc148s2.69, Vc15s190.29, Vc15s205.28, Vc16a381.32, Vc17s337.47, Vc191s1.61, Vc21p224.11, Vc21p267.0, Vc22a131.24, Vc22a31.32, Vc26a126.26, Vc28a184.20, Vc28a99.17, Vc28s139.28, Vc29a124.18, Vc29a246.26, Vc2a379.38, Vc2a400.29, Vc31a324.32, Vc32a98.23, Vc33a278.40, Vc33a61.31, Vc33p213.10, Vc33p61.8, Vc33s291.32, Vc3a29.38, Vc41a187.32, Vc42a199.39, V…	44	7813	106	52010	0.4151	4.20901e-11	****	1.15201e-09	****	Ex vs Se		127	GO:0005747	CC	mitochondrial respiratory chain complex I	Vc11a371.32, Vc11p349.6, Vc11s223.27, Vc14s104.27, Vc15a364.32, Vc15s215.39, Vc19a374.29, Vc19s76.48, Vc19s94.36, Vc24a31.39, Vc24p52.7, Vc24s169.44, Vc25s135.25, Vc28s278.42, Vc29s17.63, Vc2a149.22, Vc2s425.36, Vc2s83.30, Vc33s297.35, Vc3a328.22, Vc3s306.34, Vc48a108.36, Vc68s5.35, Vc82s5.37, Vc8a9.46	25	9109	43	52010	0.5814	2.64878e-09	****	8.13822e-08	****	Se vs Sa		GO:0052716	MF
128	GO:0010345	BP	suberin biosynthetic process	Vc22s240.29, Vc43s144.22, Vc47s54.13, Vc54a12.26, Vc57a6.30, Vc57a7.37	6	1861	10	52010	0.6	3.86285e-07	****	4.48755e-06	****	Ex vs Sa		128	GO:0004190	MF	aspartic-type endopeptidase activity	Novel0132, Novel0180, Novel1719, Novel2156, Novel3465, Novel4239, Novel5120, Vc10s186.25, Vc13s37.51, Vc15p231.16, Vc16s270.41, Vc19a272.32, Vc1a247.15, Vc21a241.25, Vc21p146.0, Vc22p5.0, Vc24a191.24, Vc2a197.34, Vc2a341.19, Vc30a197.17, Vc30a293.32, Vc30a343.51, Vc32a174.17, Vc32a327.34, Vc32p230.1, Vc32s173.22, Vc32s300.33, Vc33p191.4, Vc33p69.1, Vc34s284.47, Vc372s0.22, Vc37p267.13, Vc37s21.35…	47	7813	118	52010	0.3983	5.21974e-11	****	1.41749e-09	****	Ex vs Se		128	GO:0071805	BP	potassium ion transmembrane transport	Vc10s148.19, Vc12a356.29, Vc138a0.21, Vc13p46.2, Vc13s24.21, Vc15a377.33, Vc16a256.16, Vc18a146.17, Vc19p331.5, Vc1a44.30, Vc20s228.18, Vc21s46.37, Vc26a47.26, Vc28s126.21, Vc29s47.29, Vc2s21.40, Vc30a302.34, Vc30s280.35, Vc31a202.21, Vc31a211.16, Vc37a296.27, Vc38a13.18, Vc39s6.40, Vc3s419.29, Vc41p221.7, Vc41s238.50, Vc42s37.34, Vc43s127.60, Vc44s130.20, Vc4a37.37, Vc51s14.33, Vc5a43.25, Vc5s26…	42	9109	97	52010	0.433	2.96731e-09	****	9.04567e-08	****	Se vs Sa		GO:0010345	BP
129	GO:0008289	MF	lipid binding	Novel0179, Novel2048, Vc14p42.4, Vc1s251.29, Vc22a27.16, Vc25p41.0, Vc27a6.25, Vc28a82.25, Vc2s374.41, Vc2s58.20, Vc33a271.34, Vc35a85.21, Vc3p385.0, Vc43p222.9, Vc44a234.29, Vc46a73.17, Vc4a173.16, Vc5a319.26, Vc5a65.38, Vc8a196.32, Vc8a196.33, Vc9a126.25	22	1861	178	52010	0.1236	4.76223e-07	****	5.48948e-06	****	Ex vs Sa		129	GO:0005615	CC	extracellular space	Vc11a399.36, Vc12a100.16, Vc12a60.43, Vc13a282.24, Vc14s274.29, Vc15a391.61, Vc15s391.62, Vc16a164.21, Vc17s15.35, Vc18a6.28, Vc19a68.53, Vc20a72.60, Vc21s15.41, Vc249a0.58, Vc27p13.2, Vc28a286.23, Vc29s10.40, Vc2a321.20, Vc31a76.17, Vc32a93.23, Vc33a305.26, Vc34s279.54, Vc40a30.26, Vc41p39.24, Vc41p41.22, Vc42p195.3, Vc48a48.25, Vc4s218.31, Vc7a20.26, Vc7a268.16, Vc801p0.0	31	7813	61	52010	0.5082	6.12593e-11	****	1.65068e-09	****	Ex vs Se		129	GO:0006094	BP	gluconeogenesis	Vc12a129.12, Vc12a138.21, Vc12p71.16, Vc14a382.32, Vc166a2.38, Vc16a125.32, Vc17a3.20, Vc18a269.27, Vc1a201.20, Vc23a285.8, Vc26a153.15, Vc27a2.18, Vc29a151.22, Vc2a436.36, Vc303a0.49, Vc31a35.31, Vc33a127.25, Vc33a187.26, Vc40a2.24, Vc40p56.9, Vc40s63.38, Vc41a12.13, Vc41a3.32, Vc45a65.31, Vc62p4.2, Vc7a307.23, Vc8a220.27	27	9109	49	52010	0.551	3.13747e-09	****	9.49025e-08	****	Se vs Sa		GO:0008289	MF
130	GO:0006355	BP	regulation of DNA-templated transcription	Vc10a319.37, Vc10a390.33, Vc10p26.5, Vc11a207.26, Vc11a371.31, Vc11s334.37, Vc12a358.27, Vc12a395.19, Vc1486s0.3, Vc14a273.30, Vc14p199.7, Vc15a200.28, Vc15a341.41, Vc15a360.46, Vc15s305.29, Vc15s324.35, Vc17a317.37, Vc17a52.12, Vc17p311.1, Vc18a20.24, Vc18a364.34, Vc19a273.26, Vc19a368.29, Vc19p28.10, Vc1a360.23, Vc1a421.18, Vc20a163.20, Vc20a302.16, Vc20a371.28, Vc20p29.2, Vc20p29.7, Vc20p356.1…	108	1861	1846	52010	0.0585	4.93516e-07	****	5.64507e-06	****	Ex vs Sa		130	GO:0000287	MF	magnesium ion binding	Vc10a209.25, Vc10a364.26, Vc10s243.33, Vc11a364.40, Vc13s219.23, Vc1541a0.2, Vc156a1.31, Vc15a369.30, Vc165a0.31, Vc17a93.20, Vc17s45.37, Vc17s73.32, Vc18s339.45, Vc19a379.34, Vc19s12.31, Vc1a199.30, Vc1a236.25, Vc21a331.44, Vc21s80.35, Vc22a119.33, Vc22a310.49, Vc23a40.20, Vc24a26.32, Vc25a100.22, Vc25s86.26, Vc26a322.40, Vc26a78.21, Vc27a17.24, Vc27a54.30, Vc27s271.27, Vc28a0.29, Vc28p188.16, V…	84	7813	277	52010	0.3032	7.83347e-11	****	2.08238e-09	****	Ex vs Se		130	GO:0005985	BP	sucrose metabolic process	Vc12a363.24, Vc12s128.53, Vc13p394.9, Vc159a0.22, Vc22p365.12, Vc23s287.27, Vc23s43.39, Vc30p0.1, Vc37a105.23, Vc38s175.32, Vc40a55.29, Vc40s261.37, Vc41s14.32, Vc41s246.36, Vc43p8.20, Vc46p201.21, Vc47p189.24, Vc613p0.1, Vc6p193.11, Vc71p6.8	20	9109	30	52010	0.6667	3.53853e-09	****	1.0621e-07	****	Se vs Sa		GO:0006355	BP
131	GO:0000166	MF	nucleotide binding	Vc10a119.40, Vc12p138.6, Vc12s139.44, Vc14s276.39, Vc1a311.33, Vc25a320.39, Vc35s201.18, Vc36p156.4, Vc37s23.34, Vc39s273.32, Vc4a11.38, Vc4a3.28, Vc4p32.6, Vc4s297.30, Vc5a290.27, Vc8a140.37, Vc9s266.31, Vc9s3.42	18	1861	125	52010	0.144	5.38874e-07	****	6.08642e-06	****	Ex vs Sa		131	GO:0050661	MF	NADP binding	Vc12a13.29, Vc12p345.9, Vc14a174.42, Vc14s199.40, Vc16a0.17, Vc16a0.19, Vc16a347.20, Vc16p258.5, Vc16s262.34, Vc16s97.20, Vc18a144.27, Vc18a49.30, Vc18s100.32, Vc18s382.86, Vc19s110.25, Vc200a0.29, Vc20p107.2, Vc22a42.34, Vc23a28.33, Vc23a362.41, Vc25s256.50, Vc28p247.2, Vc28s33.38, Vc2a245.40, Vc2s239.36, Vc30a80.26, Vc30a80.27, Vc31a294.27, Vc32a15.27, Vc35a177.13, Vc36a177.9, Vc36s238.20, Vc3a…	49	7813	127	52010	0.3858	7.86695e-11	****	2.08238e-09	****	Ex vs Se		131	GO:0016616	MF	oxidoreductase activity, acting on the CH-OH group of donors, NAD or NADP as acceptor	Vc11a233.23, Vc11s320.37, Vc14a183.19, Vc15a227.19, Vc15a308.29, Vc16a13.35, Vc16a13.36, Vc17a93.20, Vc187a1.54, Vc18a360.34, Vc18a360.35, Vc19a22.35, Vc19a256.19, Vc19a366.36, Vc1a187.26, Vc20a23.26, Vc21a241.21, Vc22s26.56, Vc22s304.47, Vc24a160.31, Vc26a0.15, Vc26a237.28, Vc27a54.30, Vc27p90.1, Vc28s79.22, Vc29p229.2, Vc2a267.30, Vc2a351.33, Vc33a316.14, Vc33a324.17, Vc33s114.33, Vc34a25.19, V…	61	9109	167	52010	0.3653	3.61943e-09	****	1.07809e-07	****	Se vs Sa		GO:0000166	MF
132	GO:0005504	MF	fatty acid binding	Vc14p208.7, Vc16p23.9, Vc18a373.31, Vc20a166.14, Vc28a159.23, Vc3p190.1, Vc44a160.13, Vc7s397.42	8	1861	22	52010	0.3636	5.40287e-07	****	6.08642e-06	****	Ex vs Sa		132	GO:0048544	BP	recognition of pollen	Vc103a1.29, Vc133a2.18, Vc1a430.38, Vc1p428.27, Vc1s428.50, Vc22p126.3, Vc23a311.36, Vc23s309.41, Vc24p205.10, Vc24s205.89, Vc24s205.99, Vc24s209.34, Vc25a307.30, Vc25a310.42, Vc28a32.43, Vc2a313.27, Vc35a94.33, Vc3a99.25, Vc44a24.31, Vc5a372.25, Vc6s60.48, Vc8a22.29, Vc9a138.29	23	7813	37	52010	0.6216	7.90779e-11	****	2.08238e-09	****	Ex vs Se		132	GO:0046556	MF	alpha-L-arabinofuranosidase activity	Vc10a173.27, Vc11a32.30, Vc15a40.12, Vc16a122.23, Vc17s123.33, Vc18s72.38, Vc1a259.28, Vc31a30.33, Vc34a229.41, Vc37a160.20, Vc38a147.24, Vc39a152.14, Vc45a82.25, Vc5a238.12, Vc6a275.33, Vc7a310.16, Vc8a395.25	17	9109	23	52010	0.7391	4.64182e-09	****	1.37215e-07	****	Se vs Sa		GO:0005504	MF
133	GO:0009414	BP	response to water deprivation	Vc10a342.30, Vc10s394.22, Vc14s19.34, Vc15a373.26, Vc15s373.36, Vc17a163.18, Vc17a163.19, Vc18s145.24, Vc1a69.26, Vc1a7.44, Vc1p398.3, Vc22a341.40, Vc22s268.28, Vc25s25.33, Vc2a101.19, Vc2a333.29, Vc34a187.19, Vc37s189.25, Vc3a410.20, Vc3a70.37, Vc43a31.37, Vc45a129.27, Vc5a56.26, Vc5s7.37, Vc7a143.23, Vc8a353.26	26	1861	239	52010	0.1088	5.7049e-07	****	6.37834e-06	****	Ex vs Sa		133	GO:0009714	BP	chalcone metabolic process	Novel3539, Novel4416, Vc13a46.32, Vc25a173.26, Vc2a67.14, Vc30a303.29, Vc32a318.21, Vc35a1.21, Vc3a334.17, Vc42a14.30, Vc4p104.3, Vc9p64.0	12	7813	12	52010	1	1.31115e-10	****	3.42673e-09	****	Ex vs Se		133	GO:0072334	BP	UDP-galactose transmembrane transport	Vc13a7.23, Vc14a274.20, Vc14s141.21, Vc21a317.34, Vc25a219.17, Vc25a317.25, Vc26a309.28, Vc29a297.28, Vc2s192.39, Vc30a150.47, Vc30a263.27, Vc37a110.25, Vc37s125.15, Vc3a249.22, Vc3a84.39, Vc42a54.34	16	9109	21	52010	0.7619	6.42718e-09	****	1.88563e-07	****	Se vs Sa		GO:0009414	BP
134	GO:1904823	BP	purine nucleobase transmembrane transport	Vc11a119.37, Vc18a63.33, Vc18s63.48, Vc26a111.38, Vc29a111.27, Vc31a281.60, Vc33a227.33	7	1861	16	52010	0.4375	6.39278e-07	****	7.09408e-06	****	Ex vs Sa		134	GO:0006108	BP	malate metabolic process	Vc10a30.27, Vc1335p0.1, Vc139a1.25, Vc16p5.1, Vc17p79.24, Vc187a1.54, Vc21a198.32, Vc22a47.36, Vc22s26.56, Vc26a0.15, Vc26a195.28, Vc27p23.19, Vc30s68.47, Vc33a156.18, Vc33a316.14, Vc33a324.17, Vc34p269.11, Vc35a283.38, Vc35a307.23, Vc35s22.36, Vc36a260.22, Vc36a42.30, Vc45p44.27, Vc4s420.28, Vc4s65.63, Vc5p392.7, Vc775a0.11, Vc9a396.27, Vc9p40.21	29	7813	56	52010	0.5179	1.39834e-10	****	3.62733e-09	****	Ex vs Se		134	GO:0098661	BP	inorganic anion transmembrane transport	Vc10a278.16, Vc12a336.20, Vc17s350.31, Vc19p56.29, Vc27a313.28, Vc34s32.27, Vc35a35.27, Vc35p301.2, Vc36p21.9, Vc40a231.20, Vc41s215.25, Vc44a192.19, Vc4p427.6, Vc8a295.12, Vc9p389.3	15	9109	19	52010	0.7895	8.40013e-09	****	2.44607e-07	****	Se vs Sa		GO:1904823	BP
135	GO:0005737	CC	cytoplasm	Novel0709, Novel0854, Novel1844, Novel2668, Vc10a222.29, Vc10a380.40, Vc10a381.28, Vc10a381.30, Vc10a381.33, Vc10p225.6, Vc11a245.18, Vc11a269.29, Vc11a285.25, Vc11p299.22, Vc11p43.4, Vc11s329.68, Vc11s329.75, Vc11s364.56, Vc12a345.40, Vc13a131.20, Vc13a282.27, Vc13a45.43, Vc14a22.24, Vc14a54.30, Vc14p162.0, Vc14p326.5, Vc14s233.25, Vc14s322.43, Vc14s354.49, Vc1533a0.4, Vc15a255.20, Vc15a269.38, …	199	1861	3959	52010	0.0503	7.38797e-07	****	8.13771e-06	****	Ex vs Sa		135	GO:0004427	MF	inorganic diphosphate phosphatase activity	Vc10s243.33, Vc1335p0.1, Vc16p5.1, Vc17a169.23, Vc17a380.29, Vc17s45.37, Vc18p379.6, Vc27a132.27, Vc27s340.32, Vc28a0.29, Vc34a182.36, Vc34a317.28, Vc39s35.41, Vc45a134.28, Vc49s3.45, Vc5a158.19, Vc60a8.35, Vc74a6.27, Vc75a6.31, Vc7p409.4, Vc81a2.28, Vc8s257.20	22	7813	35	52010	0.6286	1.49485e-10	****	3.84895e-09	****	Ex vs Se		135	GO:0046294	BP	formaldehyde catabolic process	Vc140a1.34, Vc140a2.69, Vc14a164.30, Vc23a356.23, Vc25a193.23, Vc25a198.35, Vc25s189.22, Vc25s198.36, Vc2p211.19, Vc2p211.3, Vc33s300.30, Vc37a186.29, Vc38a122.30, Vc38a123.26, Vc39s131.28, Vc3a232.30, Vc3s232.35, Vc705a0.7	18	9109	26	52010	0.6923	8.72496e-09	****	2.52184e-07	****	Se vs Sa		GO:0005737	CC
136	GO:0016829	MF	lyase activity	Vc13a391.28, Vc16a328.28, Vc188a0.17, Vc20a352.37, Vc21a51.39, Vc21p224.11, Vc28a25.27, Vc28s139.28, Vc29a52.37, Vc29s213.42, Vc2a302.39, Vc31p39.8, Vc31s275.28, Vc33a131.36, Vc33a283.24, Vc34a2.28, Vc34a235.26, Vc35s201.18, Vc36p156.4, Vc44a16.23, Vc49a28.31, Vc4a11.38, Vc4a3.28, Vc4p32.6, Vc4s297.30, Vc71a2.23, Vc9s266.31, Vc9s3.42	28	1861	275	52010	0.1018	8.23781e-07	****	9.00708e-06	****	Ex vs Sa		136	GO:0102483	MF	scopolin beta-glucosidase activity	Vc15a315.27, Vc15a315.28, Vc15a315.29, Vc17s123.33, Vc17s360.29, Vc18p273.2, Vc18s72.38, Vc19s360.31, Vc24a72.33, Vc24s73.41, Vc34a21.31, Vc34a229.41, Vc43a98.22, Vc4p419.17, Vc7a89.32, Vc9a397.25	16	7813	20	52010	0.8	1.75085e-10	****	4.47496e-09	****	Ex vs Se		136	GO:0009617	BP	response to bacterium	Vc12s40.56, Vc13s257.23, Vc19p331.5, Vc21a85.21, Vc21p27.11, Vc22a254.31, Vc23a357.24, Vc23p119.24, Vc26s82.33, Vc27a35.20, Vc29a84.20, Vc30a146.39, Vc32a121.31, Vc33a254.25, Vc33p292.4, Vc35a84.23, Vc36a83.18, Vc37a154.17, Vc37s153.23, Vc38a153.21, Vc38a154.21, Vc43a132.31, Vc43a252.25, Vc46a86.22, Vc47a69.25, Vc47p76.22, Vc4a358.29, Vc517p0.2, Vc6a364.11, Vc9a334.16	30	9109	60	52010	0.5	8.97976e-09	****	2.5764e-07	****	Se vs Sa		GO:0016829	MF
137	GO:0046527	MF	glucosyltransferase activity	Novel3202, Vc14s354.49, Vc16s325.47, Vc1a316.27, Vc20a68.33, Vc20a68.35, Vc28a290.34, Vc32p295.2, Vc36p225.11, Vc36p225.9, Vc36s226.33, Vc37a300.34, Vc39p2.0, Vc40a5.27, Vc48s55.35, Vc4p123.16, Vc4p123.4, Vc552s0.9	18	1861	129	52010	0.1395	8.65358e-07	****	9.39261e-06	****	Ex vs Sa		137	GO:1902222	BP	erythrose 4-phosphate/phosphoenolpyruvate family amino acid catabolic process	Vc10a222.29, Vc10a222.30, Vc10p225.6, Vc11a255.46, Vc11p299.22, Vc11s215.35, Vc15a283.32, Vc15s208.30, Vc19a331.32, Vc1a185.22, Vc1a186.19, Vc1a187.25, Vc217p1.3, Vc24a101.15, Vc25s347.34, Vc26a180.26, Vc29a173.18, Vc33a169.12, Vc5a235.33, Vc5s236.31, Vc5s236.34, Vc8a235.20, Vc8a235.22, Vc8a236.15	24	7813	41	52010	0.5854	1.84194e-10	****	4.67341e-09	****	Ex vs Se		137	GO:0016301	MF	kinase activity	Novel2376, Novel4561, Novel4811, Novel5261, Vc10a149.15, Vc10a209.25, Vc10a255.15, Vc10a373.31, Vc10p234.4, Vc10s292.17, Vc10s317.27, Vc113p3.2, Vc11a130.24, Vc11a2.25, Vc11a222.37, Vc11a223.22, Vc11a32.30, Vc11s231.50, Vc1248a0.5, Vc12a129.12, Vc132s3.41, Vc134a1.22, Vc139p2.1, Vc13a291.15, Vc13s18.37, Vc14a215.24, Vc14a342.49, Vc14a365.29, Vc14s60.23, Vc15a122.20, Vc15a206.21, Vc15a215.31, Vc15…	250	9109	1022	52010	0.2446	9.75109e-09	****	2.77728e-07	****	Se vs Sa		GO:0046527	MF
138	GO:0004190	MF	aspartic-type endopeptidase activity	Vc13p141.11, Vc151p1.1, Vc19a272.32, Vc21p146.0, Vc22p5.0, Vc282s0.58, Vc30a197.17, Vc30p225.1, Vc32p230.1, Vc32s173.22, Vc33p191.4, Vc372s0.22, Vc37p267.13, Vc38p8.9, Vc42a133.24, Vc6p371.4, Vc907p0.0	17	1861	118	52010	0.1441	1.09683e-06	****	1.18188e-05	****	Ex vs Sa		138	GO:0009820	BP	alkaloid metabolic process	Novel0044, Novel1893, Novel4248, Vc10p338.6, Vc10s181.40, Vc119s3.55, Vc11a306.33, Vc11p246.8, Vc126p0.2, Vc13s119.30, Vc13s178.29, Vc14a69.29, Vc14p380.8, Vc14s111.28, Vc15a291.31, Vc15a58.22, Vc15p242.0, Vc15p243.0, Vc16a211.26, Vc16a352.18, Vc18s44.37, Vc19a153.16, Vc19a17.33, Vc19a337.39, Vc19a63.31, Vc19a68.52, Vc19p288.0, Vc19p289.3, Vc20a374.29, Vc20a66.37, Vc20a72.59, Vc21a6.39, Vc21p326.…	76	7813	245	52010	0.3102	1.88709e-10	****	4.75328e-09	****	Ex vs Se		138	GO:0030145	MF	manganese ion binding	Novel5013, Vc10a316.29, Vc10p20.8, Vc11a245.14, Vc14a185.28, Vc14a286.23, Vc17a154.18, Vc17p11.5, Vc19s291.30, Vc1a97.33, Vc24a143.44, Vc27p10.1, Vc27s115.44, Vc2a226.19, Vc34a197.26, Vc34s283.21, Vc38a7.34, Vc3a303.30, Vc45a112.20, Vc45s58.30, Vc5p402.7, Vc5s100.28, Vc68s7.71, Vc70a7.66, Vc72a1.20, Vc85s3.18, Vc8a27.37, Vc8a318.19	28	9109	54	52010	0.5185	9.87823e-09	****	2.7931e-07	****	Se vs Sa		GO:0004190	MF
139	GO:0016701	MF	oxidoreductase activity, acting on single donors with incorporation of molecular oxygen	Novel1520, Vc4a31.55, Vc4a9.46, Vc7a383.31, Vc9s5.39	5	1861	7	52010	0.7143	1.15359e-06	****	1.19957e-05	****	Ex vs Sa		139	GO:0009617	BP	response to bacterium	Vc12s40.56, Vc13s257.23, Vc15a284.22, Vc19p331.5, Vc21a85.21, Vc21p27.11, Vc22a254.31, Vc23a357.24, Vc23p119.24, Vc24a100.33, Vc26s82.33, Vc29a84.20, Vc29p22.9, Vc29s233.30, Vc30a146.39, Vc32a121.31, Vc33a118.14, Vc33a254.25, Vc33p292.4, Vc35a84.23, Vc37a253.25, Vc37s153.23, Vc38a154.21, Vc43a132.31, Vc43a252.25, Vc46a86.22, Vc47a69.25, Vc47p76.22, Vc517p0.2, Vc6a364.11	30	7813	60	52010	0.5	2.09093e-10	****	5.22883e-09	****	Ex vs Se		139	GO:0010305	BP	leaf vascular tissue pattern formation	Vc19s378.36, Vc1a359.30, Vc20s218.41, Vc218a0.26, Vc23a277.22, Vc24a28.29, Vc25a289.27, Vc2a294.28, Vc35a226.25, Vc35p165.11, Vc36s192.17, Vc3a346.23, Vc3a381.15, Vc3s119.25, Vc4a319.24, Vc4p263.13, Vc5a338.32, Vc8a98.20, Vc9s226.24	19	9109	29	52010	0.6552	1.35634e-08	****	3.80751e-07	****	Se vs Sa		GO:0016701	MF
140	GO:0010158	BP	abaxial cell fate specification	Vc12a358.27, Vc23a40.19, Vc25a40.21, Vc2a57.23, Vc40a256.30	5	1861	7	52010	0.7143	1.15359e-06	****	1.19957e-05	****	Ex vs Sa		140	GO:0006820	BP	monoatomic anion transport	Vc12a42.33, Vc12a5.23, Vc19a126.27, Vc20s123.32, Vc26s22.45, Vc28s223.24, Vc29a7.41, Vc29s20.42, Vc32a55.30, Vc33a295.32, Vc36a62.33, Vc44s89.29, Vc4s368.31	13	7813	14	52010	0.9286	2.37028e-10	****	5.88506e-09	****	Ex vs Se		140	GO:0009820	BP	alkaloid metabolic process	Novel1893, Novel4248, Vc10s181.40, Vc119s3.55, Vc11a383.35, Vc11p246.8, Vc126p0.2, Vc12p86.3, Vc12s87.25, Vc13s178.29, Vc14a69.29, Vc14p380.8, Vc14s111.28, Vc15a247.22, Vc15p243.0, Vc16a211.26, Vc16a352.18, Vc16s125.41, Vc17a84.25, Vc18s44.37, Vc19a116.30, Vc19a153.16, Vc19a17.33, Vc19a68.52, Vc20a18.30, Vc20a72.59, Vc20s251.35, Vc21a6.39, Vc22a109.15, Vc22a239.22, Vc22a7.22, Vc23a323.23, Vc24a13…	79	9109	245	52010	0.3224	1.54064e-08	****	4.29398e-07	****	Se vs Sa		GO:0010158	BP
141	GO:0033494	BP	ferulate metabolic process	Vc14s354.49, Vc36p225.9, Vc38s101.15, Vc552s0.9, Vc6a422.25	5	1861	7	52010	0.7143	1.15359e-06	****	1.19957e-05	****	Ex vs Sa		141	GO:0016042	BP	lipid catabolic process	Vc10a149.15, Vc10a66.28, Vc12a350.33, Vc13s37.54, Vc15a311.31, Vc17a174.19, Vc19a17.33, Vc19a363.25, Vc19a62.27, Vc1a374.32, Vc20a41.51, Vc21a334.28, Vc22p22.7, Vc23a33.25, Vc26a129.42, Vc27a304.51, Vc28a314.41, Vc28s293.31, Vc29a127.28, Vc29a60.40, Vc30a278.30, Vc30s293.49, Vc31a341.58, Vc31a93.28, Vc32a308.29, Vc32p328.3, Vc33a210.28, Vc34a41.39, Vc38a264.51, Vc39p237.0, Vc40p247.16, Vc41a231.3…	43	7813	107	52010	0.4019	2.41564e-10	****	5.95515e-09	****	Ex vs Se		141	GO:0015267	MF	channel activity	Novel3033, Vc12a290.24, Vc1334s0.10, Vc13a192.29, Vc14a386.31, Vc17s355.42, Vc19a63.33, Vc20a66.39, Vc21p129.2, Vc225a1.30, Vc23a103.24, Vc26a133.20, Vc27a318.45, Vc28a292.34, Vc28a45.24, Vc2a440.34, Vc32a179.30, Vc33a207.17, Vc34s27.36, Vc40a184.31, Vc41a171.17, Vc41a278.57, Vc43s134.30, Vc47a66.24, Vc48a56.38, Vc54a13.52	26	9109	49	52010	0.5306	1.76745e-08	****	4.8912e-07	****	Se vs Sa		GO:0033494	BP
142	GO:0102360	MF	daphnetin 3-O-glucosyltransferase activity	Vc20a68.33, Vc20a68.35, Vc28a290.34, Vc37a300.34, Vc39p2.0	5	1861	7	52010	0.7143	1.15359e-06	****	1.19957e-05	****	Ex vs Sa		142	GO:0046983	MF	protein dimerization activity	Novel2397, Novel3855, Novel4493, Novel5261, Vc102a1.33, Vc10s399.42, Vc11a352.34, Vc11p379.7, Vc12a60.42, Vc13a88.12, Vc13p48.41, Vc14a201.25, Vc14a342.49, Vc14s120.13, Vc153a0.21, Vc15a339.25, Vc15a371.25, Vc1602s0.7, Vc16a8.26, Vc17a313.25, Vc17s157.22, Vc17s166.24, Vc19a381.30, Vc19p4.6, Vc1s1.32, Vc20a5.31, Vc21a355.29, Vc21s241.28, Vc22a233.18, Vc22a324.29, Vc22a46.34, Vc22s21.29, Vc22s30.36…	97	7813	344	52010	0.282	2.561e-10	****	6.26903e-09	****	Ex vs Se		142	GO:0019953	BP	sexual reproduction	Vc13a314.21, Vc20p29.3, Vc21p97.3, Vc21s90.36, Vc26a88.29, Vc26p95.5, Vc29p96.2, Vc30p83.11, Vc33a248.38, Vc33p241.8, Vc36a149.25, Vc36a154.20, Vc42a212.24, Vc48a87.31, Vc4a299.25, Vc9a268.35	16	9109	22	52010	0.7273	1.97008e-08	****	5.41356e-07	****	Se vs Sa		GO:0102360	MF
143	GO:0102425	MF	myricetin 3-O-glucosyltransferase activity	Vc20a68.33, Vc20a68.35, Vc28a290.34, Vc37a300.34, Vc39p2.0	5	1861	7	52010	0.7143	1.15359e-06	****	1.19957e-05	****	Ex vs Sa		143	GO:0032259	BP	methylation	Novel0710, Novel4100, Vc10a110.29, Vc10a23.16, Vc10a323.26, Vc1144s0.6, Vc114a0.28, Vc11a340.42, Vc11a362.45, Vc11s327.45, Vc12a125.27, Vc12a286.31, Vc12s70.66, Vc13s341.30, Vc14a148.27, Vc14a192.34, Vc14a224.22, Vc14a239.15, Vc14a26.25, Vc14a374.18, Vc14a75.33, Vc14a79.29, Vc15a354.40, Vc15p267.24, Vc16a248.14, Vc16a368.24, Vc16a368.30, Vc17a128.25, Vc17a235.23, Vc17p14.18, Vc17p295.3, Vc17s145.…	175	7813	738	52010	0.2371	2.76757e-10	****	6.72733e-09	****	Ex vs Se		143	GO:0050660	MF	flavin adenine dinucleotide binding	Novel0824, Novel4218, Vc10s378.40, Vc11p360.7, Vc11s364.56, Vc12p345.9, Vc13s159.19, Vc1436p0.0, Vc16s124.27, Vc16s262.34, Vc16s97.20, Vc17p143.0, Vc17s219.15, Vc18p147.3, Vc18s100.32, Vc18s299.27, Vc1a25.26, Vc1s229.29, Vc20a11.26, Vc21a254.23, Vc21a71.25, Vc22a233.23, Vc23a28.33, Vc23s196.23, Vc24s41.43, Vc26a247.18, Vc27s271.27, Vc286s0.55, Vc28a340.35, Vc29p240.3, Vc30a80.26, Vc31a34.26, Vc31…	53	9109	143	52010	0.3706	2.09132e-08	****	5.70652e-07	****	Se vs Sa		GO:0102425	MF
144	GO:0016746	MF	acyltransferase activity	Novel3172, Novel3206, Vc11a145.15, Vc12a290.25, Vc12p375.8, Vc132a3.31, Vc13a282.27, Vc15a134.19, Vc18a312.31, Vc18s44.37, Vc21a108.29, Vc21p54.4, Vc22a19.24, Vc23s103.32, Vc24a250.20, Vc26a107.28, Vc26a56.34, Vc27a30.24, Vc29a108.20, Vc29a55.29, Vc30a117.25, Vc30a321.23, Vc31p214.2, Vc32a278.28, Vc32a93.26, Vc33a231.26, Vc33a280.28, Vc34s260.51, Vc40a184.32, Vc41a171.18, Vc42a195.21, Vc61p6.35, …	33	1861	363	52010	0.0909	1.19547e-06	****	1.23449e-05	****	Ex vs Sa		144	GO:0051259	BP	protein complex oligomerization	Novel1844, Vc14p261.41, Vc15p329.2, Vc17a341.47, Vc19p357.13, Vc19p46.20, Vc19s349.40, Vc21p134.1, Vc24p83.21, Vc25p301.6, Vc26p137.7, Vc27a304.48, Vc27a333.41, Vc29p134.6, Vc29p135.3, Vc3p106.7, Vc46p142.0, Vc46p142.14, Vc46p142.5, Vc46p142.6, Vc46s142.36, Vc47p106.18	22	7813	36	52010	0.6111	3.29521e-10	****	7.95427e-09	****	Ex vs Se		144	GO:0036211	BP	protein modification process	Vc10s107.31, Vc12a295.21, Vc12s78.54, Vc149a0.23, Vc15a302.27, Vc15p286.2, Vc162a2.37, Vc17a364.31, Vc19a371.27, Vc19p333.2, Vc19p63.21, Vc1s326.44, Vc1s77.31, Vc20p67.0, Vc23a128.30, Vc23s332.41, Vc24p99.3, Vc28p291.7, Vc29a10.23, Vc2a171.24, Vc329a0.33, Vc32s285.41, Vc33a305.29, Vc36s52.42, Vc38a151.14, Vc40s9.41, Vc41s154.33, Vc45a60.17, Vc48p56.7, Vc4p133.1, Vc5a63.28, Vc5p290.9, Vc5s306.30, …	37	9109	85	52010	0.4353	2.12747e-08	****	5.76485e-07	****	Se vs Sa		GO:0016746	MF
145	GO:0016126	BP	sterol biosynthetic process	Vc12a120.20, Vc17s219.15, Vc23a292.22, Vc27p200.0, Vc28s279.34, Vc34p156.4, Vc40a48.15, Vc40s217.49, Vc41a21.20, Vc43a238.20, Vc45a200.22	11	1861	51	52010	0.2157	1.52182e-06	****	1.56065e-05	****	Ex vs Sa		145	GO:0005509	MF	calcium ion binding	Vc10a198.18, Vc10a323.26, Vc10p388.3, Vc10s265.32, Vc1143a0.5, Vc11a281.29, Vc11p331.35, Vc12a350.33, Vc12a92.40, Vc12s44.37, Vc13p40.9, Vc13p70.2, Vc13p70.4, Vc13s37.54, Vc14s185.45, Vc15a265.33, Vc15a315.28, Vc15a315.29, Vc15a322.27, Vc15p371.13, Vc17a169.23, Vc17a321.35, Vc17p0.5, Vc17p169.6, Vc17s6.46, Vc19a312.36, Vc19a350.27, Vc19s115.29, Vc19s360.31, Vc1a210.33, Vc1s138.31, Vc1s453.38, Vc2…	124	7813	478	52010	0.2594	3.54845e-10	****	8.50649e-09	****	Ex vs Se		145	GO:0009651	BP	response to salt stress	Novel4490, Vc102a4.41, Vc10s394.22, Vc117a2.46, Vc13a49.38, Vc13s266.40, Vc13s70.42, Vc140a1.34, Vc14a372.28, Vc15a231.23, Vc15p329.2, Vc16a144.17, Vc16a95.34, Vc17a341.47, Vc17p92.9, Vc18a258.26, Vc18s236.23, Vc19p357.13, Vc19s349.40, Vc1a20.24, Vc1a7.44, Vc1p389.11, Vc1s138.31, Vc20a121.20, Vc21a203.25, Vc21a85.21, Vc21p134.1, Vc21p261.1, Vc22a72.30, Vc23a334.27, Vc24a157.27, Vc24p83.21, Vc25a1…	104	9109	353	52010	0.2946	2.21003e-08	****	5.94726e-07	****	Se vs Sa		GO:0016126	BP
146	GO:0009055	MF	electron transfer activity	Vc10a342.30, Vc13s100.34, Vc1410a0.7, Vc146a1.41, Vc1a69.26, Vc20s273.27, Vc26p167.7, Vc28a94.28, Vc29p164.1, Vc2a369.26, Vc32a308.29, Vc38a209.33, Vc40a212.30, Vc42a8.27, Vc44s88.35, Vc5a56.26, Vc65a8.50, Vc791a0.4, Vc84p3.7, Vc8a353.26	20	1861	162	52010	0.1235	1.58077e-06	****	1.56771e-05	****	Ex vs Sa		146	GO:0000325	CC	plant-type vacuole	Novel1996, Vc10s13.29, Vc115p2.20, Vc117a2.46, Vc119s3.55, Vc12a254.22, Vc12a44.31, Vc13p354.9, Vc14a186.29, Vc14a264.33, Vc14a69.29, Vc14s331.53, Vc15a107.18, Vc15a159.14, Vc16a390.30, Vc17a387.48, Vc17p17.5, Vc18s180.20, Vc19a272.32, Vc19a91.43, Vc19s65.38, Vc1s138.31, Vc21a376.27, Vc21a85.21, Vc22a291.34, Vc22s87.36, Vc23p27.5, Vc24s214.30, Vc25p330.6, Vc26a364.26, Vc26s82.33, Vc27p23.3, Vc29a…	75	7813	244	52010	0.3074	3.94764e-10	****	9.39864e-09	****	Ex vs Se		146	GO:0046961	MF	proton-transporting ATPase activity, rotational mechanism	Vc10a226.28, Vc126a0.20, Vc12a59.41, Vc13s282.38, Vc14a264.33, Vc16a207.28, Vc17a313.23, Vc236a0.56, Vc23a351.31, Vc23p353.10, Vc27a278.21, Vc27a341.32, Vc2s302.48, Vc2s433.31, Vc2s434.26, Vc30a116.24, Vc31a24.38, Vc31a322.33, Vc32a94.24, Vc34s66.31, Vc36p168.7, Vc38a0.13, Vc38a288.36, Vc39a42.21, Vc3a104.26, Vc42s195.27, Vc44s90.33, Vc47a169.35, Vc4a286.34, Vc50a11.21, Vc6s405.40, Vc7p316.14, Vc…	36	9109	82	52010	0.439	2.50384e-08	****	6.69178e-07	****	Se vs Sa		GO:0009055	MF
147	GO:0031559	MF	oxidosqualene cyclase activity	Vc12a304.18, Vc23s87.18, Vc40s217.49, Vc41a187.32, Vc41s186.31, Vc44a146.31	6	1861	12	52010	0.5	1.59761e-06	****	1.56771e-05	****	Ex vs Sa		147	GO:0010089	BP	xylem development	Vc102a4.41, Vc17s59.28, Vc18s180.19, Vc21a112.20, Vc21a112.21, Vc22a36.36, Vc22s130.28, Vc23a291.17, Vc29a112.21, Vc2a237.26, Vc33a226.20, Vc34a250.32, Vc43s237.33, Vc46a10.21, Vc684a0.6	15	7813	19	52010	0.7895	9.36333e-10	****	2.21408e-08	****	Ex vs Se		147	GO:0034605	BP	cellular response to heat	Novel2231, Novel2908, Vc13a239.16, Vc19a24.33, Vc21a51.38, Vc22a115.30, Vc22a180.17, Vc22a344.19, Vc25a6.28, Vc26a52.34, Vc28a332.27, Vc29a52.36, Vc29p235.2, Vc2a24.22, Vc30a161.24, Vc32s159.37, Vc33a283.25, Vc35s286.26, Vc38s277.25, Vc3a400.25, Vc3a415.25, Vc40a229.22, Vc42s154.43, Vc43a251.34, Vc43s28.26, Vc46p60.11, Vc48a91.35, Vc48s9.41, Vc6s76.35	29	9109	59	52010	0.4915	2.59018e-08	****	6.87544e-07	****	Se vs Sa		GO:0031559	MF
148	GO:0016719	MF	carotene 7,8-desaturase activity	Vc17s360.29, Vc1a374.32, Vc34a21.31, Vc44s154.23, Vc4p419.17, Vc9a397.25	6	1861	12	52010	0.5	1.59761e-06	****	1.56771e-05	****	Ex vs Sa		148	GO:0007017	BP	microtubule-based process	Vc10a161.18, Vc10s377.34, Vc11a8.21, Vc13a108.11, Vc13a78.32, Vc1426a0.2, Vc15p329.28, Vc16a348.28, Vc16a381.41, Vc17a17.16, Vc17s221.33, Vc18a15.26, Vc18a48.38, Vc30a327.34, Vc31a295.31, Vc31a325.19, Vc32a266.23, Vc32s287.27, Vc34a256.31, Vc35a236.28, Vc35a304.29, Vc39s274.28, Vc44a240.22, Vc45a28.21, Vc45a31.32, Vc47a41.16, Vc4a328.35, Vc4a423.38, Vc5s23.39, Vc5s288.39, Vc7a48.44, Vc7a59.35, Vc…	35	7813	81	52010	0.4321	1.0837e-09	****	2.54037e-08	****	Ex vs Se		148	GO:0009738	BP	abscisic acid-activated signaling pathway	Vc10a224.19, Vc10a381.33, Vc10s381.47, Vc10s382.22, Vc11a302.17, Vc12a302.25, Vc14a236.21, Vc14a236.26, Vc14p50.7, Vc14s321.47, Vc15s385.43, Vc169a0.20, Vc18a2.21, Vc19a333.25, Vc21a141.31, Vc21p261.1, Vc22p173.7, Vc23a89.30, Vc25a129.24, Vc25a239.19, Vc25s86.24, Vc26a145.26, Vc26p252.4, Vc28a191.29, Vc29a142.29, Vc2a110.22, Vc2a281.20, Vc2a371.35, Vc2p15.3, Vc300s0.48, Vc31p337.9, Vc31s56.26, Vc…	59	9109	167	52010	0.3533	2.63926e-08	****	6.91167e-07	****	Se vs Sa		GO:0016719	MF
149	GO:0052886	MF	9,9'-dicis-carotene:quinone oxidoreductase activity	Vc17s360.29, Vc1a374.32, Vc34a21.31, Vc44s154.23, Vc4p419.17, Vc9a397.25	6	1861	12	52010	0.5	1.59761e-06	****	1.56771e-05	****	Ex vs Sa		149	GO:0000981	MF	DNA-binding transcription factor activity, RNA polymerase II-specific	Vc108a3.29, Vc10a199.19, Vc11a110.26, Vc11a199.24, Vc126a3.49, Vc13a109.19, Vc13s70.42, Vc14a376.24, Vc153a0.21, Vc15a106.16, Vc15a192.30, Vc16s224.37, Vc17s167.20, Vc17s59.28, Vc18s180.19, Vc19a265.20, Vc19s85.42, Vc1a209.13, Vc20a297.24, Vc20s89.36, Vc22a155.20, Vc22a156.19, Vc22s130.28, Vc23a291.17, Vc23p326.0, Vc24a179.19, Vc24a283.19, Vc24a294.19, Vc27s149.23, Vc28a272.28, Vc28s77.25, Vc2a43…	60	7813	182	52010	0.3297	1.08894e-09	****	2.54037e-08	****	Ex vs Se		149	GO:0009723	BP	response to ethylene	Vc10a375.26, Vc10a60.47, Vc12a134.24, Vc13a115.23, Vc13s302.30, Vc148s2.69, Vc14a356.53, Vc14a56.20, Vc14s356.75, Vc14s57.22, Vc14s57.24, Vc16a144.17, Vc16a95.34, Vc16s224.37, Vc17p61.0, Vc18a258.26, Vc18s180.19, Vc1a368.30, Vc20a121.20, Vc21a303.25, Vc21p54.4, Vc21s266.29, Vc22s52.23, Vc266a0.69, Vc266a0.70, Vc26a296.32, Vc26a56.34, Vc27p357.7, Vc29a282.23, Vc29a55.29, Vc2a9.31, Vc2s10.32, Vc2s4…	59	9109	167	52010	0.3533	2.63926e-08	****	6.91167e-07	****	Se vs Sa		GO:0052886	MF
150	GO:0052887	MF	7,9,9'-tricis-neurosporene:quinone oxidoreductase activity	Vc17s360.29, Vc1a374.32, Vc34a21.31, Vc44s154.23, Vc4p419.17, Vc9a397.25	6	1861	12	52010	0.5	1.59761e-06	****	1.56771e-05	****	Ex vs Sa		150	GO:0098869	BP	cellular oxidant detoxification	Vc10a336.34, Vc10s232.19, Vc11p309.17, Vc12a2.25, Vc12a45.30, Vc12p345.9, Vc13s302.30, Vc14a323.40, Vc14s392.31, Vc16a42.29, Vc16s34.52, Vc17a321.35, Vc17a37.35, Vc18a14.24, Vc18a290.18, Vc19a269.28, Vc1a74.31, Vc1p45.9, Vc1s138.31, Vc1s176.37, Vc20a277.24, Vc21a112.20, Vc21a112.21, Vc21a254.23, Vc21p26.2, Vc23a28.33, Vc24p92.1, Vc25a316.26, Vc26a247.18, Vc26a26.19, Vc26s79.34, Vc27a286.23, Vc28s…	91	7813	324	52010	0.2809	1.11714e-09	****	2.58878e-08	****	Ex vs Se		150	GO:0120029	BP	proton export across plasma membrane	Vc150a0.17, Vc16a50.35, Vc17a253.34, Vc18s349.50, Vc27a234.32, Vc30p330.8, Vc34a122.18, Vc36a4.28, Vc55a7.22, Vc56a11.54, Vc6p426.16, Vc7s374.47, Vc95p0.8, Vc98a4.55, Vc9a410.31	15	9109	20	52010	0.75	2.81081e-08	****	7.31186e-07	****	Se vs Sa		GO:0052887	MF
151	GO:0042910	MF	xenobiotic transmembrane transporter activity	Vc14s366.38, Vc21p311.0, Vc23a333.30, Vc26p304.17, Vc26s304.43, Vc26s305.50, Vc29p292.3, Vc2a421.33, Vc35s82.35, Vc36s159.21, Vc3a104.21, Vc40a9.29, Vc4a170.22, Vc4a293.24	14	1861	84	52010	0.1667	1.63182e-06	****	1.56771e-05	****	Ex vs Sa		151	GO:1902600	BP	proton transmembrane transport	Novel4776, Vc10a226.28, Vc11a167.32, Vc11s112.24, Vc126a0.20, Vc12a44.31, Vc12a59.41, Vc12s161.27, Vc1335p0.1, Vc138a0.21, Vc13a268.27, Vc13p47.9, Vc14a186.29, Vc14a264.33, Vc15a107.18, Vc16a207.28, Vc16p5.1, Vc17a169.23, Vc17p362.19, Vc18a146.17, Vc18p379.6, Vc19a235.34, Vc19a337.40, Vc22a290.27, Vc22s25.18, Vc236a0.56, Vc23a351.31, Vc23p273.7, Vc23p353.10, Vc24s95.40, Vc27a132.27, Vc27p23.3, Vc…	79	7813	268	52010	0.2948	1.21961e-09	****	2.80752e-08	****	Ex vs Se		151	GO:0033612	MF	receptor serine/threonine kinase binding	Novel5248, Vc13p7.3, Vc14a102.30, Vc14a133.25, Vc151a1.13, Vc151a2.48, Vc17a364.31, Vc21s302.26, Vc25a138.21, Vc27s268.33, Vc29s281.26, Vc2a81.15, Vc30p263.5, Vc35a113.29, Vc39s102.29, Vc3a330.26, Vc42p54.0, Vc4a230.25, Vc4p133.1, Vc5a372.22, Vc8s54.38, Vc9a168.13, Vc9p88.1	23	9109	41	52010	0.561	2.91932e-08	****	7.54382e-07	****	Se vs Sa		GO:0042910	MF
152	GO:0080169	BP	cellular response to boron-containing substance deprivation	Vc11a207.26, Vc15a200.28, Vc19a273.26, Vc24a191.23	4	1861	4	52010	1	1.63413e-06	****	1.56771e-05	****	Ex vs Sa		152	GO:0016135	BP	saponin biosynthetic process	Vc12a15.23, Vc12a31.26, Vc12a323.22, Vc21p224.11, Vc23a68.32, Vc23a68.33, Vc23p364.3, Vc28s139.28, Vc32a98.23, Vc40a218.18, Vc41a202.24, Vc41a202.31, Vc41a203.19, Vc42a199.39	14	7813	17	52010	0.8235	1.27673e-09	****	2.91968e-08	****	Ex vs Se		152	GO:0042732	BP	D-xylose metabolic process	Vc11a388.33, Vc19p53.17, Vc20a52.37, Vc20a56.37, Vc22a274.30, Vc23a288.26, Vc24p9.29, Vc28p301.31, Vc37s300.42, Vc38a10.26, Vc39a2.30, Vc40a54.30, Vc41a15.32, Vc43a9.42, Vc46a130.34, Vc46a199.38, Vc47a92.25, Vc51s11.44, Vc6a419.31	19	9109	30	52010	0.6333	3.08791e-08	****	7.92698e-07	****	Se vs Sa		GO:0080169	BP
153	GO:0030639	BP	polyketide biosynthetic process	Vc13a46.32, Vc30a303.29, Vc32a318.21, Vc42a14.30	4	1861	4	52010	1	1.63413e-06	****	1.56771e-05	****	Ex vs Sa		153	GO:0009423	BP	chorismate biosynthetic process	Vc12p239.1, Vc16a328.28, Vc16p258.5, Vc18a144.27, Vc19s62.29, Vc20s122.39, Vc22a39.37, Vc23a128.29, Vc23a252.31, Vc23p119.12, Vc24s67.47, Vc28s293.33, Vc30a270.32, Vc31s204.43, Vc40a166.23, Vc40p75.7, Vc41a155.30, Vc41a65.20, Vc42a46.35, Vc42s22.29, Vc48s57.36	21	7813	35	52010	0.6	1.35038e-09	****	3.06793e-08	****	Ex vs Se		153	GO:0031072	MF	heat shock protein binding	Vc11p330.36, Vc11s329.68, Vc11s329.75, Vc136a1.27, Vc14a307.32, Vc14a325.38, Vc157a2.45, Vc15p320.2, Vc16p293.20, Vc199p0.5, Vc19s348.58, Vc20a370.22, Vc21a152.24, Vc22s81.47, Vc24a84.33, Vc25a357.28, Vc26a155.35, Vc27a35.20, Vc29p153.14, Vc2a360.27, Vc2a376.21, Vc2s150.26, Vc2s376.28, Vc31a281.59, Vc33a185.36, Vc35p40.7, Vc36p269.1, Vc3a47.23, Vc3s32.32, Vc44p6.20, Vc49p11.26, Vc56a3.40, Vc61a2.…	34	9109	76	52010	0.4474	3.41837e-08	****	8.71797e-07	****	Se vs Sa		GO:0030639	BP
154	GO:0043481	BP	anthocyanin accumulation in tissues in response to UV light	Vc35s201.18, Vc36p156.4, Vc4s297.30, Vc9s266.31	4	1861	4	52010	1	1.63413e-06	****	1.56771e-05	****	Ex vs Sa		154	GO:0045893	BP	positive regulation of DNA-templated transcription	Novel0103, Novel0402, Novel3292, Vc10a95.34, Vc12s169.39, Vc13s70.42, Vc14a54.29, Vc14s321.47, Vc15a146.25, Vc169a0.20, Vc17a101.14, Vc17s355.52, Vc18a2.21, Vc19a237.25, Vc19a63.36, Vc19p364.10, Vc19s313.36, Vc1s338.32, Vc20a67.30, Vc21p261.1, Vc22a36.36, Vc22s294.21, Vc23a138.22, Vc24a117.29, Vc25a52.29, Vc25p288.6, Vc25p330.6, Vc26p252.4, Vc28a291.23, Vc29a172.20, Vc2a371.35, Vc2p333.1, Vc31p33…	62	7813	192	52010	0.3229	1.46851e-09	****	3.31463e-08	****	Ex vs Se		154	GO:0016688	MF	L-ascorbate peroxidase activity	Vc10s232.19, Vc11p309.17, Vc13s302.30, Vc15a294.29, Vc18a14.24, Vc1s176.37, Vc24p92.1, Vc31s326.42, Vc32s76.26, Vc35a54.42, Vc36a216.26, Vc39s195.45, Vc6s228.38, Vc7a201.15, Vc7a50.34, Vc8a248.21, Vc9a90.20	17	9109	25	52010	0.68	3.47187e-08	****	8.79691e-07	****	Se vs Sa		GO:0043481	BP
155	GO:0140615	CC	ATP-dependent citrate lyase complex	Vc35s201.18, Vc36p156.4, Vc4s297.30, Vc9s266.31	4	1861	4	52010	1	1.63413e-06	****	1.56771e-05	****	Ex vs Sa		155	GO:0010025	BP	wax biosynthetic process	Vc13p97.14, Vc14a256.29, Vc17a165.31, Vc17p165.20, Vc19s130.30, Vc27s126.51, Vc27s128.42, Vc2a302.39, Vc35s201.18, Vc36p156.4, Vc3a111.29, Vc4s297.30, Vc9s266.31	13	7813	15	52010	0.8667	1.53028e-09	****	3.43179e-08	****	Ex vs Se		155	GO:0055075	BP	potassium ion homeostasis	Vc12a356.29, Vc138a0.21, Vc13s24.21, Vc41s238.50, Vc42s37.34, Vc4a37.37, Vc5a410.20, Vc6a25.34, Vc6s15.51, Vc6s35.30, Vc80a3.29, Vc90a5.67, Vc93a5.51, Vc9a12.33	14	9109	18	52010	0.7778	3.80474e-08	****	9.57812e-07	****	Se vs Sa		GO:0140615	CC
156	GO:0045493	BP	xylan catabolic process	Vc13p141.11, Vc30p225.1, Vc32p230.1, Vc37p267.13, Vc38p8.9, Vc6p371.4, Vc8a395.25	7	1861	18	52010	0.3889	1.66965e-06	****	1.58196e-05	****	Ex vs Sa		156	GO:0008299	BP	isoprenoid biosynthetic process	Vc10p6.0, Vc12a15.23, Vc12a31.26, Vc12a374.21, Vc132a2.36, Vc13a32.22, Vc14a192.34, Vc200s1.44, Vc210s1.56, Vc21a306.25, Vc22p189.5, Vc23p364.3, Vc23s55.27, Vc24a58.38, Vc26a299.24, Vc30a287.23, Vc38p294.24, Vc3a203.34, Vc40a277.14, Vc41a256.15, Vc42a29.16, Vc46a145.24, Vc46p72.6, Vc46p76.4, Vc47a123.34, Vc48s20.43, Vc5a410.21, Vc6s74.37, Vc83a1.29, Vc8a14.35, Vc8p3.4	31	7813	68	52010	0.4559	1.93955e-09	****	4.29583e-08	****	Ex vs Se		156	GO:0004185	MF	serine-type carboxypeptidase activity	Vc119s3.55, Vc14a69.29, Vc16a352.18, Vc17s225.20, Vc18s44.37, Vc19a68.52, Vc20a72.59, Vc22a89.30, Vc22a89.31, Vc22s169.36, Vc24a107.17, Vc28a286.24, Vc31s300.21, Vc37a286.26, Vc38s14.24, Vc39s15.30, Vc3a7.31, Vc45a207.25, Vc48a49.41, Vc6s405.42	20	9109	33	52010	0.6061	3.92116e-08	****	9.80792e-07	****	Se vs Sa		GO:0045493	BP
157	GO:0009911	BP	positive regulation of flower development	Vc26s130.36, Vc29s127.41, Vc33s210.34, Vc35s201.18, Vc36p156.4, Vc4s297.30, Vc691a0.7, Vc8a74.30, Vc9s266.31	9	1861	33	52010	0.2727	1.67026e-06	****	1.58196e-05	****	Ex vs Sa		157	GO:0006006	BP	glucose metabolic process	Vc12a13.29, Vc14s199.40, Vc16a0.17, Vc16a0.19, Vc18s382.86, Vc23a362.41, Vc25s256.50, Vc25s86.26, Vc28p188.16, Vc2a245.40, Vc2s239.36, Vc300a0.36, Vc35a177.13, Vc36a177.9, Vc3a191.27, Vc3a357.26, Vc3s199.36, Vc3s376.32, Vc44a187.15, Vc48a56.35, Vc6a38.29, Vc7a405.22, Vc7a405.24, Vc80a5.36, Vc93a2.31, Vc9p238.20	26	7813	51	52010	0.5098	1.94029e-09	****	4.29583e-08	****	Ex vs Se		157	GO:0008483	MF	transaminase activity	Novel4540, Vc10a26.18, Vc10a95.29, Vc10s114.37, Vc10s282.33, Vc11a205.22, Vc11a348.27, Vc1202a0.9, Vc13a11.31, Vc14s274.29, Vc15a199.24, Vc15a337.28, Vc17p139.4, Vc17s145.20, Vc1a416.35, Vc1s316.32, Vc20a141.17, Vc24a186.30, Vc24a53.36, Vc25a351.19, Vc27a9.10, Vc27p100.7, Vc27p357.7, Vc27s109.30, Vc27s151.30, Vc27s278.25, Vc27s331.34, Vc30a267.28, Vc34a66.26, Vc34s205.30, Vc35a197.37, Vc36a21.25,…	51	9109	138	52010	0.3696	4.26039e-08	****	1.05886e-06	****	Se vs Sa		GO:0009911	BP
158	GO:0006012	BP	galactose metabolic process	Vc10s394.22, Vc17a163.18, Vc17a163.19, Vc1a7.44, Vc2a333.29, Vc34a187.19, Vc3a70.37, Vc45a129.27, Vc5s7.37	9	1861	34	52010	0.2647	2.19933e-06	****	2.05685e-05	****	Ex vs Sa		158	GO:0009073	BP	aromatic amino acid family biosynthetic process	Vc12p239.1, Vc16a328.28, Vc16a67.37, Vc16p232.2, Vc16p258.5, Vc18a144.27, Vc18s329.39, Vc19s62.29, Vc22a39.37, Vc23a128.29, Vc23a252.31, Vc23p119.12, Vc28s293.33, Vc28s70.33, Vc30a270.32, Vc40a166.23, Vc40p75.7, Vc41a155.30, Vc41a65.20, Vc42a46.35, Vc42s22.29, Vc48s57.36, Vc7a357.32	23	7813	42	52010	0.5476	2.6758e-09	****	5.88675e-08	****	Ex vs Se		158	GO:1990961	BP	xenobiotic detoxification by transmembrane export across the plasma membrane	Vc11s112.24, Vc13p332.7, Vc14p264.18, Vc14s366.38, Vc15a107.18, Vc20s143.34, Vc23a333.30, Vc24a293.28, Vc24a293.29, Vc28s206.51, Vc2a421.33, Vc2p302.22, Vc36s159.21, Vc37p241.9, Vc38a171.30, Vc38p71.5, Vc39p75.3, Vc3a104.21, Vc3s104.28, Vc42p254.2, Vc4a170.22, Vc4a293.24, Vc61a8.61, Vc6p347.2, Vc70s1.35, Vc9s122.24	26	9109	51	52010	0.5098	5.21178e-08	****	1.28711e-06	****	Se vs Sa		GO:0006012	BP
159	GO:0035672	BP	oligopeptide transmembrane transport	Vc23a48.43, Vc26a31.32, Vc27a195.32, Vc29a28.29, Vc29a29.27, Vc33a287.37, Vc40a268.30, Vc41a250.32, Vc45a195.23	9	1861	34	52010	0.2647	2.19933e-06	****	2.05685e-05	****	Ex vs Sa		159	GO:0016998	BP	cell wall macromolecule catabolic process	Vc12a10.30, Vc12a37.34, Vc12a382.41, Vc12p382.8, Vc14a385.20, Vc23p16.4, Vc23s17.40, Vc25a163.31, Vc25a163.32, Vc25a163.34, Vc25a163.35, Vc30s82.54, Vc32s66.30, Vc35a54.42, Vc36a216.26, Vc41a264.29, Vc41p264.23, Vc42a213.43, Vc53a15.50, Vc53a15.52, Vc53p15.32, Vc9a90.20	22	7813	39	52010	0.5641	2.79104e-09	****	6.10167e-08	****	Ex vs Se		159	GO:0016121	BP	carotene catabolic process	Vc10p43.7, Vc11p278.8, Vc15p262.8, Vc16s306.25, Vc18a93.23, Vc19p310.5, Vc1p398.3, Vc24p122.11, Vc2p78.0, Vc3p332.10, Vc5p375.4, Vc7s104.21	12	9109	14	52010	0.8571	5.29859e-08	****	1.30032e-06	****	Se vs Sa		GO:0035672	BP
160	GO:0016036	BP	cellular response to phosphate starvation	Vc10a278.16, Vc115a1.24, Vc11a207.26, Vc13a282.27, Vc15a141.15, Vc15a200.28, Vc19a273.26, Vc19s226.15, Vc24a191.23, Vc30a117.25, Vc32a93.26, Vc42a195.21, Vc8a295.12	13	1861	75	52010	0.1733	2.41899e-06	****	2.24815e-05	****	Ex vs Sa		160	GO:0006090	BP	pyruvate metabolic process	Vc139a1.25, Vc187a1.54, Vc1s25.46, Vc22s26.56, Vc26a0.15, Vc30s68.47, Vc33a316.14, Vc33a324.17, Vc35a283.38, Vc35a307.23, Vc36a42.30, Vc4s40.39, Vc4s420.28, Vc9a396.27, Vc9s17.47	15	7813	20	52010	0.75	3.22008e-09	****	6.95217e-08	****	Ex vs Se		160	GO:0042910	MF	xenobiotic transmembrane transporter activity	Vc11a111.24, Vc11s112.24, Vc13p332.7, Vc14p264.18, Vc14s366.38, Vc15a107.18, Vc20s143.34, Vc23a333.30, Vc24a293.28, Vc24a293.29, Vc28s206.51, Vc29p262.23, Vc29p291.1, Vc2a421.33, Vc2p302.22, Vc36s159.21, Vc37p241.9, Vc37s216.40, Vc38a171.30, Vc38p71.5, Vc38s94.24, Vc39p75.3, Vc3a104.21, Vc3s104.28, Vc42p254.2, Vc4a170.22, Vc4a293.24, Vc597s0.19, Vc5s191.48, Vc61a8.61, Vc6p347.2, Vc6s319.23, Vc70s…	36	9109	84	52010	0.4286	5.35037e-08	****	1.30482e-06	****	Se vs Sa		GO:0016036	BP
161	GO:0019438	BP	aromatic compound biosynthetic process	Novel4416, Vc19p4.6, Vc2a379.38, Vc38a291.14, Vc38s101.15, Vc3a29.38, Vc6a422.25	7	1861	19	52010	0.3684	2.56161e-06	****	2.36591e-05	****	Ex vs Sa		161	GO:0120029	BP	proton export across plasma membrane	Vc16a50.35, Vc17a253.34, Vc18s349.50, Vc27a234.32, Vc30p330.8, Vc34a122.18, Vc34a4.21, Vc35a320.55, Vc36a4.28, Vc55a7.22, Vc56a11.54, Vc6p426.16, Vc7s374.47, Vc95p0.8, Vc9a410.31	15	7813	20	52010	0.75	3.22008e-09	****	6.95217e-08	****	Ex vs Se		161	GO:0003777	MF	microtubule motor activity	Vc13a287.20, Vc13s285.50, Vc1a31.30, Vc21p266.4, Vc22a117.29, Vc22a135.25, Vc26a256.29, Vc30a108.31, Vc30a112.38, Vc30a113.20, Vc31s37.24, Vc32a99.28, Vc33a60.26, Vc35a304.29, Vc37s246.22, Vc38a288.31, Vc39s71.32, Vc43a233.24, Vc43s248.23, Vc494a0.13, Vc4a423.38, Vc5p26.8, Vc83a1.23, Vc8s15.32, Vc9a393.23	25	9109	48	52010	0.5208	5.40837e-08	****	1.31077e-06	****	Se vs Sa		GO:0019438	BP
162	GO:0009505	CC	plant-type cell wall	Vc126s3.69, Vc13a282.27, Vc1s45.29, Vc21a112.20, Vc21a112.21, Vc29a112.21, Vc2a320.20, Vc30a117.25, Vc32a93.26, Vc33a226.20, Vc37a166.16, Vc3a84.40, Vc3p36.24, Vc42a195.21, Vc60a3.27	15	1861	100	52010	0.15	2.76913e-06	****	2.54179e-05	****	Ex vs Sa		162	GO:0016788	MF	hydrolase activity, acting on ester bonds	Vc10a66.28, Vc11a128.27, Vc11s73.25, Vc12a248.24, Vc149a1.17, Vc16s254.23, Vc17a189.18, Vc17s360.29, Vc19p210.23, Vc1a374.32, Vc20a343.24, Vc20p342.1, Vc24s266.44, Vc25a184.27, Vc25a323.20, Vc26a236.28, Vc28a32.42, Vc29a228.27, Vc2a215.24, Vc2a325.19, Vc32a308.29, Vc33p115.0, Vc33p53.2, Vc34a21.31, Vc35s190.38, Vc38a264.50, Vc38a264.51, Vc3s228.41, Vc40a130.26, Vc44a24.29, Vc44s154.23, Vc44s23.22…	41	7813	107	52010	0.3832	3.36962e-09	****	7.23013e-08	****	Ex vs Se		162	GO:0009414	BP	response to water deprivation	Novel4490, Vc10s394.22, Vc115p2.20, Vc11a233.23, Vc12a290.24, Vc12p209.5, Vc140a1.34, Vc14a111.26, Vc14a114.28, Vc14a372.28, Vc15a227.19, Vc15a231.23, Vc16a386.41, Vc16a390.30, Vc18a9.22, Vc199s0.45, Vc1a7.44, Vc1p389.11, Vc1p398.3, Vc21a141.31, Vc21a85.21, Vc21p129.2, Vc21p261.1, Vc22p365.12, Vc22s268.28, Vc23a103.24, Vc23p236.2, Vc24a157.27, Vc24a160.31, Vc24p122.11, Vc25a314.55, Vc26a133.20, V…	76	9109	239	52010	0.318	5.48648e-08	****	1.3215e-06	****	Se vs Sa		GO:0009505	CC
163	GO:0035673	MF	oligopeptide transmembrane transporter activity	Vc23a48.43, Vc26a31.32, Vc27a195.32, Vc29a28.29, Vc29a29.27, Vc33a287.37, Vc40a268.30, Vc41a250.32, Vc45a195.23	9	1861	35	52010	0.2571	2.86654e-06	****	2.61506e-05	****	Ex vs Sa		163	GO:1901566	BP	organonitrogen compound biosynthetic process	Vc10a26.18, Vc10s114.37, Vc14a76.19, Vc14a79.31, Vc16a368.30, Vc187a1.47, Vc19a269.28, Vc19a44.49, Vc1a416.35, Vc1s316.32, Vc211a0.22, Vc211a0.23, Vc22a197.17, Vc22a42.34, Vc237a0.44, Vc23a330.25, Vc25a61.24, Vc26a1.30, Vc26p329.6, Vc27p357.7, Vc29a5.21, Vc2s399.76, Vc30a169.20, Vc32a151.27, Vc32p230.4, Vc33a310.30, Vc33a315.25, Vc33a325.27, Vc34a293.16, Vc36a54.44, Vc3a418.17, Vc40a12.24, Vc43a1…	37	7813	92	52010	0.4022	4.09491e-09	****	8.73247e-08	****	Ex vs Se		163	GO:0003993	MF	acid phosphatase activity	Vc1047s0.8, Vc10a7.35, Vc10s265.32, Vc10s265.34, Vc14a101.13, Vc14a377.33, Vc19a318.34, Vc1a438.29, Vc20s96.24, Vc23s77.31, Vc25a171.17, Vc25s68.34, Vc28s328.36, Vc2a79.25, Vc32a17.19, Vc35a229.22, Vc36a121.22, Vc39p37.0, Vc3a332.25, Vc40a211.27, Vc41a196.20, Vc43a44.44, Vc48a87.28, Vc48s17.43, Vc4p322.22, Vc5s132.30, Vc8a1.31, Vc8s287.21, Vc9s298.25	29	9109	61	52010	0.4754	6.62261e-08	****	1.58536e-06	****	Se vs Sa		GO:0035673	MF
164	GO:0005992	BP	trehalose biosynthetic process	Vc12a304.18, Vc23s87.18, Vc37a226.21, Vc38s84.29, Vc39s90.9, Vc41a187.32, Vc41s186.31, Vc6p333.13	8	1861	28	52010	0.2857	4.33498e-06	****	3.93056e-05	****	Ex vs Sa		164	GO:0004175	MF	endopeptidase activity	Vc12a100.16, Vc12a60.43, Vc13a282.24, Vc15s391.62, Vc16a164.21, Vc18a6.28, Vc19a68.53, Vc20a72.60, Vc21s15.41, Vc28a286.23, Vc29s10.40, Vc31a76.17, Vc32a93.23, Vc33a305.26, Vc40a30.26, Vc41p39.24, Vc41p41.22, Vc42p195.3, Vc48a48.25, Vc4s218.31, Vc7a20.26, Vc7a268.16, Vc801p0.0	23	7813	43	52010	0.5349	4.93168e-09	****	1.04127e-07	****	Ex vs Se		164	GO:0008553	MF	P-type proton-exporting transporter activity	Vc150a0.17, Vc16a50.35, Vc17a253.34, Vc18s349.50, Vc27a234.32, Vc30p330.8, Vc34a122.18, Vc36a4.28, Vc55a7.22, Vc56a11.54, Vc6p426.16, Vc7s374.47, Vc95p0.8, Vc98a4.55, Vc9a410.31	15	9109	21	52010	0.7143	8.23105e-08	****	1.95839e-06	****	Se vs Sa		GO:0005992	BP
165	GO:0016798	MF	hydrolase activity, acting on glycosyl bonds	Vc13p141.11, Vc20s376.32, Vc28s1.30, Vc30p225.1, Vc32p230.1, Vc37p267.13, Vc38p8.9, Vc38s242.14, Vc6p371.4	9	1861	37	52010	0.2432	4.7348e-06	****	4.26706e-05	****	Ex vs Sa		165	GO:0055075	BP	potassium ion homeostasis	Vc12a356.29, Vc138a0.21, Vc13s24.21, Vc41s238.50, Vc42s37.34, Vc4a37.37, Vc5a410.20, Vc6a25.34, Vc6s15.51, Vc6s35.30, Vc80a3.29, Vc90a5.67, Vc93a5.51, Vc9a12.33	14	7813	18	52010	0.7778	4.94272e-09	****	1.04127e-07	****	Ex vs Se		165	GO:0010333	MF	terpene synthase activity	Vc12s106.30, Vc15a369.30, Vc19a379.34, Vc24a26.32, Vc35a89.23, Vc35s90.60, Vc39p78.6, Vc39s79.31, Vc41a34.48, Vc4a177.21, Vc4a177.22, Vc4a178.28, Vc4s177.24, Vc4s180.34, Vc6a338.34, Vc6p2.5, Vc9a132.34	17	9109	26	52010	0.6538	8.3818e-08	****	1.98217e-06	****	Se vs Sa		GO:0016798	MF
166	GO:0009808	BP	lignin metabolic process	Vc21a13.24, Vc24a58.38, Vc29a7.44, Vc302a0.32, Vc33p307.8, Vc46a145.24	6	1861	14	52010	0.4286	4.88087e-06	****	4.3722e-05	****	Ex vs Sa		166	GO:0016985	MF	mannan endo-1,4-beta-mannosidase activity	Vc10a93.19, Vc13a167.14, Vc17a4.32, Vc1a342.28, Vc30s209.40, Vc32p198.25, Vc34a289.32, Vc35a186.33, Vc36a168.19, Vc40a92.13, Vc42a96.24, Vc45a64.28, Vc4a285.20, Vc5a320.23, Vc8a114.23, Vc9a250.27	16	7813	23	52010	0.6957	5.62058e-09	****	1.17694e-07	****	Ex vs Se		166	GO:0008422	MF	beta-glucosidase activity	Vc15a315.28, Vc15a315.29, Vc16a93.25, Vc17a223.18, Vc17s123.33, Vc17s140.25, Vc18a303.45, Vc18s72.38, Vc19s360.31, Vc24s73.41, Vc27a205.16, Vc27s105.30, Vc31a4.23, Vc34a229.41, Vc34s209.23, Vc3s48.39, Vc43a98.22, Vc45a102.32, Vc45a205.28, Vc45a82.25, Vc7a332.36	21	9109	37	52010	0.5676	8.88242e-08	****	2.0879e-06	****	Se vs Sa		GO:0009808	BP
167	GO:0032440	MF	2-alkenal reductase [NAD(P)+] activity	Vc10a364.26, Vc11p235.2, Vc11s329.75, Vc13a268.27, Vc13s269.25, Vc14p171.3, Vc187a0.30, Vc21a306.25, Vc28a23.21, Vc29a17.49, Vc2a351.29, Vc30a132.30, Vc32a81.39, Vc33a297.25, Vc38s286.29, Vc42a181.27, Vc42s182.32, Vc83a6.47, Vc8a10.25, Vc8a376.17, Vc8a380.32, Vc8p377.7	22	1861	205	52010	0.1073	5.11137e-06	****	4.55127e-05	****	Ex vs Sa		167	GO:0006457	BP	protein folding	Novel1844, Vc1081a0.8, Vc11p330.36, Vc12a270.28, Vc136a1.27, Vc14a283.32, Vc14a307.32, Vc14a325.38, Vc14p261.41, Vc14s276.42, Vc157a2.45, Vc15p329.2, Vc15s330.54, Vc16a288.25, Vc16p293.20, Vc17a169.23, Vc17a341.47, Vc17p169.6, Vc17s352.51, Vc18p273.2, Vc18s120.45, Vc199p0.5, Vc19a348.55, Vc19a363.26, Vc19p357.13, Vc19p46.20, Vc19s348.58, Vc19s349.40, Vc21a152.24, Vc21a51.38, Vc21p134.1, Vc21s175.…	116	7813	459	52010	0.2527	6.48312e-09	****	1.34942e-07	****	Ex vs Se		167	GO:0010411	BP	xyloglucan metabolic process	Vc14s229.35, Vc1584a0.5, Vc20a157.23, Vc22a67.34, Vc25a275.37, Vc28a165.20, Vc2a265.29, Vc31s261.40, Vc35a208.17, Vc35s152.30, Vc36s205.36, Vc37a35.39, Vc38a128.38, Vc38s242.14, Vc39a135.26, Vc3a172.31, Vc4a250.24, Vc52a15.38, Vc6a206.21, Vc6s112.26, Vc6s206.28, Vc71p0.2, Vc8a19.29	23	9109	43	52010	0.5349	9.64333e-08	****	2.25319e-06	****	Se vs Sa		GO:0032440	MF
168	GO:0098552	CC	side of membrane	Vc10a332.45, Vc11s93.30, Vc15a94.18, Vc2s374.41, Vc35p216.5, Vc44a234.29, Vc5a65.38, Vc8a344.29	8	1861	29	52010	0.2759	5.79836e-06	****	5.13224e-05	****	Ex vs Sa		168	GO:0009607	BP	response to biotic stimulus	Vc10a380.40, Vc10a380.41, Vc10a381.28, Vc10a381.30, Vc10a381.33, Vc10s381.47, Vc10s382.22, Vc1505a0.7, Vc1a22.34, Vc1a22.44, Vc23a58.33, Vc28s293.36, Vc40s278.30, Vc41s257.35, Vc43a15.28, Vc5a19.35, Vc5a19.38, Vc5a20.29, Vc5s18.47, Vc6a68.32, Vc749s0.11, Vc8a391.32, Vc8a393.32, Vc8p244.9, Vc8s393.37	25	7813	50	52010	0.5	6.64762e-09	****	1.37542e-07	****	Ex vs Se		168	GO:0005783	CC	endoplasmic reticulum	Vc106s0.26, Vc10a224.21, Vc10a254.20, Vc10a316.29, Vc10a325.24, Vc10s282.33, Vc112p1.10, Vc11a375.17, Vc11p91.5, Vc12a166.24, Vc12a270.28, Vc1334a0.9, Vc1353a0.6, Vc13a286.23, Vc13a50.37, Vc1429s0.4, Vc147a1.26, Vc14a236.26, Vc14a256.29, Vc14a283.32, Vc14a283.33, Vc14a309.25, Vc14a325.38, Vc14s140.24, Vc15a212.26, Vc15a221.30, Vc15a296.30, Vc15a382.31, Vc15p95.6, Vc15s231.24, Vc15s320.73, Vc16p29…	186	9109	742	52010	0.2507	1.21851e-07	****	2.83014e-06	****	Se vs Sa		GO:0098552	CC
169	GO:0046168	BP	glycerol-3-phosphate catabolic process	Vc1326a0.7, Vc16a26.46, Vc18a376.35, Vc33a38.28, Vc7p401.11	5	1861	9	52010	0.5556	6.51683e-06	****	5.70031e-05	****	Ex vs Sa		169	GO:0048316	BP	seed development	Vc10a317.24, Vc11p387.2, Vc14a355.39, Vc17a101.14, Vc20a373.32, Vc21a376.27, Vc21p261.1, Vc266a0.64, Vc26a31.32, Vc26a364.26, Vc26p252.4, Vc28a3.33, Vc29a28.29, Vc29a347.24, Vc2a408.35, Vc33a287.37, Vc33a4.31, Vc33a55.22, Vc34a295.15, Vc35a177.13, Vc35a266.25, Vc36a177.9, Vc45a12.16, Vc9p238.20	24	7813	47	52010	0.5106	7.75986e-09	****	1.59605e-07	****	Ex vs Se		169	GO:0006108	BP	malate metabolic process	Vc10a30.27, Vc17p79.24, Vc187a1.54, Vc22a47.36, Vc22s26.56, Vc26a0.15, Vc26p117.3, Vc27p23.19, Vc29p114.4, Vc2a393.33, Vc33a316.14, Vc33a324.17, Vc33s223.25, Vc34a25.19, Vc34p269.11, Vc35a283.38, Vc35a307.23, Vc35s22.36, Vc36a260.22, Vc36a42.30, Vc45p44.27, Vc4s420.28, Vc4s65.63, Vc5p392.7, Vc775a0.11, Vc9a396.27, Vc9p40.21	27	9109	56	52010	0.4821	1.2946e-07	****	2.972e-06	****	Se vs Sa		GO:0046168	BP
170	GO:0047952	MF	glycerol-3-phosphate dehydrogenase [NAD(P)+] activity	Vc1326a0.7, Vc16a26.46, Vc18a376.35, Vc33a38.28, Vc7p401.11	5	1861	9	52010	0.5556	6.51683e-06	****	5.70031e-05	****	Ex vs Sa		170	GO:0016301	MF	kinase activity	Novel0402, Novel0710, Novel3292, Novel4561, Novel4811, Novel5261, Vc10a11.27, Vc10a149.15, Vc10a151.18, Vc10a209.25, Vc10p234.4, Vc10s292.17, Vc10s317.27, Vc113p3.2, Vc11a2.25, Vc11a222.37, Vc11a297.24, Vc11a32.30, Vc11p32.6, Vc11s231.50, Vc1248a0.5, Vc12a129.12, Vc132s3.41, Vc134a1.22, Vc139p2.1, Vc14a203.13, Vc14a342.49, Vc14p171.3, Vc15a206.21, Vc15a215.31, Vc15a388.23, Vc15p281.19, Vc16a0.20,…	221	7813	1022	52010	0.2162	8.53929e-09	****	1.74603e-07	****	Ex vs Se		170	GO:0016791	MF	phosphatase activity	Vc11a395.31, Vc12a290.25, Vc14s203.18, Vc15a386.30, Vc17a380.29, Vc17a63.26, Vc18s236.23, Vc19a37.39, Vc20a37.43, Vc214s0.36, Vc21a145.19, Vc22a19.24, Vc23a334.27, Vc23s103.32, Vc24a2.30, Vc25a208.28, Vc26a148.16, Vc27a30.24, Vc27s340.32, Vc28a319.27, Vc29a145.15, Vc2a202.28, Vc2s159.19, Vc309a0.33, Vc31a210.30, Vc31s178.17, Vc334a0.24, Vc33s192.37, Vc34s260.51, Vc36s299.40, Vc3a195.23, Vc40a184.…	37	9109	90	52010	0.4111	1.29482e-07	****	2.972e-06	****	Se vs Sa		GO:0047952	MF
171	GO:0016747	MF	acyltransferase activity, transferring groups other than amino-acyl groups	Novel3539, Novel4416, Vc16a352.18, Vc17p332.40, Vc23a277.24, Vc25a173.26, Vc28a260.29, Vc2a67.14, Vc35a1.21, Vc3a334.17, Vc42a14.30, Vc4p104.3, Vc9p64.0	13	1861	83	52010	0.1566	7.75248e-06	****	6.74149e-05	****	Ex vs Sa		171	GO:0071949	MF	FAD binding	Novel0044, Novel4753, Vc11p246.8, Vc11s275.47, Vc124a0.29, Vc124s1.42, Vc12a46.45, Vc12s46.60, Vc13a95.36, Vc13a95.37, Vc15p242.0, Vc15p243.0, Vc15s259.42, Vc16a103.23, Vc16a174.22, Vc18a294.21, Vc197a1.52, Vc19p288.0, Vc19p289.3, Vc19s307.44, Vc22a93.18, Vc24a125.25, Vc24p146.0, Vc24s144.40, Vc25a255.24, Vc25s19.42, Vc2a244.18, Vc2a255.31, Vc310a0.38, Vc31a188.20, Vc32a72.36, Vc35s263.41, Vc36a8…	41	7813	110	52010	0.3727	8.67804e-09	****	1.76403e-07	****	Ex vs Se		171	GO:0022900	BP	electron transport chain	Vc10a110.29, Vc11a256.30, Vc124a3.48, Vc12a317.27, Vc12s114.36, Vc13a59.47, Vc13p47.9, Vc13s100.34, Vc13s159.19, Vc1410a0.7, Vc14s313.40, Vc16a67.37, Vc16s97.20, Vc17a140.19, Vc17s44.41, Vc18a264.27, Vc18s299.27, Vc18s329.39, Vc1s320.35, Vc1s424.61, Vc20a79.39, Vc20s273.27, Vc22a368.31, Vc23p76.1, Vc25a311.40, Vc25a363.28, Vc28a278.37, Vc28a94.28, Vc2a149.22, Vc2a233.19, Vc2s313.38, Vc30a312.16, …	64	9109	194	52010	0.3299	1.33219e-07	****	3.03988e-06	****	Se vs Sa		GO:0016747	MF
172	GO:0006066	BP	alcohol metabolic process	Vc10a280.34, Vc11s364.56, Vc5a117.19, Vc8s296.44	4	1861	5	52010	0.8	7.93726e-06	****	6.82237e-05	****	Ex vs Sa		172	GO:0008289	MF	lipid binding	Novel0179, Novel0761, Novel2048, Vc10a249.13, Vc10a317.18, Vc11a199.24, Vc13p390.6, Vc14a178.26, Vc14a323.38, Vc151p2.37, Vc15a192.30, Vc18a14.24, Vc19a265.20, Vc1a96.22, Vc1s251.29, Vc20a213.21, Vc20s291.21, Vc21a178.20, Vc22p146.0, Vc24a179.19, Vc26a179.20, Vc26a29.34, Vc27a6.25, Vc28a136.10, Vc29s172.30, Vc2a351.33, Vc2s374.41, Vc30a258.32, Vc31s326.42, Vc33a170.17, Vc35s304.40, Vc36a172.19, V…	57	7813	178	52010	0.3202	9.22934e-09	****	1.86518e-07	****	Ex vs Se		172	GO:0016157	MF	sucrose synthase activity	Vc12a363.24, Vc13p394.9, Vc159a0.22, Vc19a307.38, Vc22p365.12, Vc23s43.39, Vc24a124.22, Vc28s82.28, Vc30p0.1, Vc40s261.37, Vc41s246.36, Vc43p8.20, Vc44s77.22, Vc46p201.21, Vc47p189.24, Vc71p6.8	16	9109	24	52010	0.6667	1.35772e-07	****	3.08012e-06	****	Se vs Sa		GO:0006066	BP
173	GO:0080051	BP	cutin transport	Vc54a12.26, Vc57a6.30, Vc57a7.37, Vc65s3.33	4	1861	5	52010	0.8	7.93726e-06	****	6.82237e-05	****	Ex vs Sa		173	GO:0008553	MF	P-type proton-exporting transporter activity	Vc16a50.35, Vc17a253.34, Vc18s349.50, Vc27a234.32, Vc30p330.8, Vc34a122.18, Vc34a4.21, Vc35a320.55, Vc36a4.28, Vc55a7.22, Vc56a11.54, Vc6p426.16, Vc7s374.47, Vc95p0.8, Vc9a410.31	15	7813	21	52010	0.7143	9.69076e-09	****	1.94711e-07	****	Ex vs Se		173	GO:0043531	MF	ADP binding	Novel1860, Vc10a163.29, Vc10p62.13, Vc10s119.52, Vc111p1.11, Vc13s134.35, Vc14s37.41, Vc166a2.38, Vc16s47.42, Vc17a145.18, Vc17a3.20, Vc17s148.29, Vc18a338.26, Vc18a351.44, Vc1a311.34, Vc1a362.25, Vc1p365.21, Vc20a257.23, Vc20p282.2, Vc20p283.6, Vc20p283.9, Vc20s256.34, Vc20s257.34, Vc21s354.32, Vc23p45.7, Vc23s167.35, Vc26a287.15, Vc26s287.24, Vc27a2.18, Vc28a103.24, Vc28p85.6, Vc29a331.11, Vc29…	58	9109	170	52010	0.3412	1.38513e-07	****	3.12414e-06	****	Se vs Sa		GO:0080051	BP
174	GO:0004650	MF	polygalacturonase activity	Vc20a352.37, Vc21a51.39, Vc22p82.4, Vc28a25.27, Vc29a52.37, Vc33a283.24, Vc43s8.49, Vc44a16.23, Vc49a28.31, Vc645p0.4	10	1861	50	52010	0.2	9.32877e-06	****	7.97235e-05	****	Ex vs Sa		174	GO:0009610	BP	response to symbiotic fungus	Novel4039, Vc10a199.19, Vc11p335.5, Vc14a326.41, Vc17a387.48, Vc17p368.3, Vc17s56.40, Vc17s56.41, Vc1a209.13, Vc21p52.6, Vc21p77.1, Vc23p303.0, Vc23s53.53, Vc26p75.3, Vc27a337.38, Vc27s332.32, Vc2p377.39, Vc30a252.34, Vc32a78.27, Vc33p281.6, Vc34a8.23, Vc34s1.31, Vc3a32.22, Vc6p77.4, Vc8a212.24	25	7813	51	52010	0.4902	1.11739e-08	****	2.23221e-07	****	Ex vs Se		174	GO:0047268	MF	galactinol-raffinose galactosyltransferase activity	Vc11a394.26, Vc16a19.20, Vc18a367.20, Vc1a293.20, Vc24a3.27, Vc38s44.21, Vc39a40.28, Vc51a4.27, Vc6s374.24	9	9109	9	52010	1	1.54539e-07	****	3.451e-06	****	Se vs Sa		GO:0004650	MF
175	GO:0009737	BP	response to abscisic acid	Vc10a224.21, Vc10a342.30, Vc10s394.22, Vc14p287.0, Vc14s19.34, Vc17a163.18, Vc17a163.19, Vc1a69.26, Vc1a7.44, Vc21a309.26, Vc25s25.33, Vc2a333.29, Vc2p332.3, Vc34a187.19, Vc37a238.15, Vc37s189.25, Vc39a82.12, Vc3a410.20, Vc3a70.37, Vc3p71.10, Vc45a129.27, Vc54a12.26, Vc57a6.30, Vc57a7.37, Vc5a56.26, Vc5s7.37, Vc8a353.26	27	1861	296	52010	0.0912	1.00865e-05	****	8.57063e-05	****	Ex vs Sa		175	GO:0016157	MF	sucrose synthase activity	Vc11a275.40, Vc12a363.24, Vc13p394.9, Vc159a0.22, Vc15a260.23, Vc19a307.38, Vc22p365.12, Vc23s43.39, Vc24a124.22, Vc30p0.1, Vc40s261.37, Vc41s246.36, Vc43p8.20, Vc46p201.21, Vc47p189.24, Vc71p6.8	16	7813	24	52010	0.6667	1.44916e-08	****	2.87844e-07	****	Ex vs Se		175	GO:0016702	MF	oxidoreductase activity, acting on single donors with incorporation of molecular oxygen, incorporation of two atoms of oxygen	Vc10a342.29, Vc10p43.7, Vc11p278.8, Vc15p262.8, Vc16a279.23, Vc16s306.25, Vc18a93.23, Vc19p310.5, Vc1p398.3, Vc1p68.6, Vc24p122.11, Vc25s105.21, Vc2p78.0, Vc35a41.24, Vc36a268.28, Vc3p332.10, Vc5a55.26, Vc5p375.4, Vc7s104.21, Vc8s354.37	20	9109	35	52010	0.5714	1.54773e-07	****	3.451e-06	****	Se vs Sa		GO:0009737	BP
176	GO:0008889	MF	glycerophosphodiester phosphodiesterase activity	Vc35a240.35, Vc37s84.37, Vc37s86.25, Vc38a194.30, Vc38a195.18, Vc38p195.2, Vc6a34.37	7	1861	23	52010	0.3043	1.09891e-05	****	9.28453e-05	****	Ex vs Sa		176	GO:0009538	CC	photosystem I reaction center	Vc10p343.0, Vc11a238.26, Vc11a360.27, Vc17a112.27, Vc19a283.11, Vc1p68.5, Vc24a155.28, Vc24a41.40, Vc27a74.17, Vc34a29.24, Vc43a68.31, Vc46p156.1, Vc5p55.7, Vc8p354.4	14	7813	19	52010	0.7368	1.61606e-08	****	3.19172e-07	****	Ex vs Se		176	GO:0031408	BP	oxylipin biosynthetic process	Vc10a342.29, Vc12a78.41, Vc16a279.23, Vc1p68.6, Vc22a254.31, Vc23a332.35, Vc25p172.0, Vc27a303.29, Vc29a9.33, Vc2a77.22, Vc2a78.9, Vc33s306.55, Vc34a42.49, Vc35a41.24, Vc36a268.28, Vc3a332.27, Vc40s9.40, Vc41s61.32, Vc43a132.31, Vc46a86.22, Vc47a69.25, Vc5a55.26, Vc8a85.28, Vc8s354.37	24	9109	47	52010	0.5106	1.62544e-07	****	3.58331e-06	****	Se vs Sa		GO:0008889	MF
177	GO:0098827	CC	endoplasmic reticulum subcompartment	Vc11p20.10, Vc12s17.27, Vc13a238.27, Vc21p224.11, Vc22a304.29, Vc28s139.28, Vc29s213.42, Vc33a131.36, Vc34a291.26, Vc43a72.30, Vc46a151.30, Vc47a126.34	12	1861	74	52010	0.1622	1.19494e-05	****	0.000100389	***	Ex vs Sa		177	GO:0009698	BP	phenylpropanoid metabolic process	Novel0854, Vc11s396.32, Vc12s40.56, Vc1429s0.4, Vc14s140.24, Vc160a2.34, Vc17a300.24, Vc17p323.0, Vc20s2.38, Vc22a254.31, Vc22s254.43, Vc23a357.24, Vc27p288.0, Vc28a349.38, Vc34a78.26, Vc34p57.9, Vc38a282.41, Vc38s101.15, Vc43a132.29, Vc43a132.31, Vc44a237.18, Vc46a86.22, Vc46a86.25, Vc47a69.25, Vc47a69.26, Vc4s342.27, Vc50p21.6, Vc51a3.22, Vc6a422.25, Vc740a0.8, Vc8a79.42, Vc9s317.36	32	7813	77	52010	0.4156	1.74769e-08	****	3.43218e-07	****	Ex vs Se		177	GO:0004857	MF	enzyme inhibitor activity	Vc11a190.18, Vc11a198.29, Vc140a2.69, Vc17s367.32, Vc19p25.22, Vc20a10.35, Vc22a40.44, Vc23a152.22, Vc23p152.2, Vc27s330.33, Vc28a341.26, Vc28p187.1, Vc34a2.28, Vc34a2.29, Vc37a186.29, Vc38a122.30, Vc40s142.27, Vc42a105.25, Vc44p186.0, Vc48a101.27, Vc54s11.33, Vc57a5.26, Vc71p4.8, Vc873a0.8	24	9109	47	52010	0.5106	1.62544e-07	****	3.58331e-06	****	Se vs Sa		GO:0098827	CC
178	GO:0042546	BP	cell wall biogenesis	Vc1584a0.5, Vc22a108.31, Vc22a2.23, Vc22a67.34, Vc26s325.22, Vc35a208.17, Vc37a35.39, Vc38s242.14, Vc52a15.38, Vc6s112.26	10	1861	53	52010	0.1887	1.60631e-05	****	0.00013419	***	Ex vs Sa		178	GO:0004565	MF	beta-galactosidase activity	Vc11a305.23, Vc126s3.69, Vc13a355.23, Vc14a377.25, Vc17a383.21, Vc20a167.17, Vc20a170.21, Vc21a8.22, Vc22a263.37, Vc28a156.23, Vc29a3.21, Vc2a431.29, Vc30a44.29, Vc32p36.24, Vc33a312.24, Vc34a19.23, Vc37s171.23, Vc42s241.40, Vc43a124.32, Vc46a95.26, Vc47a77.31, Vc6s286.38	22	7813	42	52010	0.5238	1.77231e-08	****	3.46099e-07	****	Ex vs Se		178	GO:0009835	BP	fruit ripening	Vc11s212.32, Vc1584a0.5, Vc15s205.28, Vc191s1.61, Vc20a157.23, Vc22a67.34, Vc28a165.20, Vc31s261.40, Vc35a206.17, Vc35a208.17, Vc35s152.30, Vc36s205.36, Vc37a35.39, Vc38s242.14, Vc4a250.24, Vc4a301.26, Vc52a15.38, Vc6a206.21, Vc6s112.26, Vc8a19.29, Vc9a276.20	21	9109	38	52010	0.5526	1.65657e-07	****	3.63143e-06	****	Se vs Sa		GO:0042546	BP
179	GO:1901576	BP	organic substance biosynthetic process	Vc14p329.0, Vc21a333.57, Vc21s269.49, Vc23s259.30, Vc23s53.56, Vc2a379.38, Vc37a81.25, Vc38a200.23, Vc38a291.14, Vc38a291.15, Vc39a226.23, Vc3a29.38, Vc43a61.62, Vc46s172.37, Vc6a102.15, Vc6a163.26	16	1861	130	52010	0.1231	1.76172e-05	****	0.000146351	***	Ex vs Sa		179	GO:0008270	MF	zinc ion binding	Novel0042, Novel0180, Novel0398, Novel0663, Novel1029, Novel1520, Novel1719, Novel2065, Novel3431, Novel3480, Novel4083, Novel4239, Novel4791, Novel4883, Novel4917, Novel5120, Novel5165, Novel5317, Novel5327, Vc105a4.47, Vc10a117.28, Vc10a39.35, Vc10s119.52, Vc1111p0.0, Vc113p3.2, Vc11a176.30, Vc11a224.39, Vc11a282.19, Vc11a301.20, Vc11a362.45, Vc11p293.2, Vc11s19.22, Vc11s383.41, Vc11s45.27, Vc1…	263	7813	1269	52010	0.2072	2.15595e-08	****	4.18663e-07	****	Ex vs Se		179	GO:0004672	MF	protein kinase activity	Novel2630, Novel5165, Vc10a198.17, Vc10a258.25, Vc10a258.27, Vc10a365.35, Vc10p119.3, Vc11a320.32, Vc11s19.22, Vc11s311.33, Vc1249a0.3, Vc124a0.29, Vc124s1.42, Vc12a131.19, Vc12a357.34, Vc12s3.28, Vc12s42.40, Vc12s44.37, Vc1352a0.6, Vc13a23.31, Vc13a90.24, Vc13p108.1, Vc13s19.28, Vc13s244.24, Vc13s322.18, Vc14a133.25, Vc14a371.36, Vc14s208.35, Vc1566a0.2, Vc15a302.27, Vc15s296.32, Vc15s367.40, Vc…	212	9109	870	52010	0.2437	1.69034e-07	****	3.68322e-06	****	Se vs Sa		GO:1901576	BP
180	GO:0004751	MF	ribose-5-phosphate isomerase activity	Vc23a48.43, Vc26a31.32, Vc29a28.29, Vc33a287.37, Vc40a268.30, Vc41a250.32	6	1861	17	52010	0.3529	1.83362e-05	****	0.000151477	***	Ex vs Sa		180	GO:0009836	BP	fruit ripening, climacteric	Novel0961, Vc10a375.26, Vc10a60.47, Vc11a145.15, Vc132a3.31, Vc14a356.53, Vc14p357.28, Vc14s356.75, Vc15a134.19, Vc17p329.4, Vc17p332.40, Vc17p61.0, Vc1a368.30, Vc21p54.4, Vc24a250.20, Vc266a0.69, Vc266a0.70, Vc26a56.34, Vc27s291.30, Vc29a55.29, Vc2a174.15, Vc32a261.26, Vc32a268.24, Vc33a280.28, Vc3p368.2, Vc45s33.29, Vc8a87.21, Vc8s354.40	28	7813	63	52010	0.4444	2.31486e-08	****	4.47025e-07	****	Ex vs Se		180	GO:0042026	BP	protein refolding	Vc106a4.43, Vc11a232.27, Vc13a83.25, Vc16a230.18, Vc16p71.20, Vc18a174.24, Vc22a256.40, Vc24a161.24, Vc30s323.34, Vc31a171.19, Vc32s281.37, Vc35a306.31, Vc35a6.30, Vc36a244.31, Vc36s0.30, Vc43p130.15, Vc47a71.35, Vc4a93.26, Vc4s421.35, Vc5s21.42, Vc7a174.22, Vc9s395.32	22	9109	41	52010	0.5366	1.69908e-07	****	3.68322e-06	****	Se vs Sa		GO:0004751	MF
181	GO:0009873	BP	ethylene-activated signaling pathway	Vc14a273.30, Vc17a317.37, Vc19p28.10, Vc20a302.16, Vc20p29.2, Vc20p29.7, Vc27a283.20, Vc28a73.20, Vc28s328.35, Vc2a101.19, Vc2a319.14, Vc31a327.26, Vc31p335.2, Vc43a7.31, Vc44a65.21, Vc46a202.30, Vc46a73.17, Vc47a190.29, Vc48p87.3	19	1861	176	52010	0.108	2.01557e-05	****	0.000165326	***	Ex vs Sa		181	GO:0016746	MF	acyltransferase activity	Novel3172, Novel3206, Vc10a375.26, Vc11a145.15, Vc11a275.40, Vc11a395.31, Vc12a290.25, Vc12s368.40, Vc132a3.31, Vc13a282.27, Vc13a337.31, Vc14a16.19, Vc14s50.35, Vc15a134.19, Vc15a260.23, Vc15a386.30, Vc16a230.19, Vc17a172.33, Vc17a247.17, Vc17a63.26, Vc18a173.29, Vc18a312.31, Vc18s44.37, Vc19a307.38, Vc21a108.29, Vc21a145.19, Vc21p54.4, Vc21s40.43, Vc21s80.35, Vc22a19.24, Vc22s3.26, Vc23a195.32,…	95	7813	363	52010	0.2617	2.39416e-08	****	4.59784e-07	****	Ex vs Se		181	GO:0042742	BP	defense response to bacterium	Novel0761, Novel2630, Vc11a294.25, Vc11s276.32, Vc11s372.31, Vc12a108.20, Vc13p141.11, Vc15a231.23, Vc15s261.38, Vc17a165.31, Vc17a325.31, Vc17a337.44, Vc17p165.20, Vc17p92.9, Vc17s216.36, Vc19a325.35, Vc20s371.37, Vc20s62.40, Vc20s7.30, Vc22s268.28, Vc22s52.23, Vc23a304.28, Vc23s108.36, Vc24a106.31, Vc24a123.31, Vc24a157.27, Vc24p196.2, Vc25p47.2, Vc26a174.38, Vc27a294.24, Vc27a300.32, Vc27p357.…	68	9109	212	52010	0.3208	1.8476e-07	****	3.98305e-06	****	Se vs Sa		GO:0009873	BP
182	GO:0047911	MF	galacturan 1,4-alpha-galacturonidase activity	Vc20a352.37, Vc21a51.39, Vc28a25.27, Vc29a52.37, Vc33a283.24, Vc44a16.23, Vc49a28.31	7	1861	25	52010	0.28	2.0235e-05	****	0.000165326	***	Ex vs Sa		182	GO:0071555	BP	cell wall organization	Vc112p1.10, Vc11p371.17, Vc120a0.27, Vc12a156.27, Vc14a269.40, Vc14s182.20, Vc1584a0.5, Vc15a364.29, Vc16a218.19, Vc16a350.21, Vc16a91.22, Vc16a93.25, Vc18a187.21, Vc18a235.12, Vc18a303.45, Vc18a46.32, Vc19p374.13, Vc20a157.23, Vc22a67.34, Vc23s164.30, Vc24a31.44, Vc253a0.51, Vc25s315.38, Vc28a165.20, Vc28p2.18, Vc29s233.30, Vc2a317.29, Vc30s322.31, Vc31a298.23, Vc31a4.23, Vc31a76.18, Vc31s155.33…	60	7813	196	52010	0.3061	2.48296e-08	****	4.74218e-07	****	Ex vs Se		182	GO:0016746	MF	acyltransferase activity	Novel3172, Vc1047s0.8, Vc10a375.26, Vc113a2.24, Vc11a395.31, Vc12a290.25, Vc12p375.8, Vc12s368.40, Vc13a337.31, Vc13a68.42, Vc14a16.19, Vc14a286.20, Vc14s213.22, Vc14s50.35, Vc15a386.30, Vc16a230.19, Vc17a172.33, Vc17a247.17, Vc17a63.26, Vc17s225.20, Vc17s235.27, Vc18a173.29, Vc18s158.28, Vc18s44.37, Vc19a307.38, Vc19a72.27, Vc20a289.19, Vc20a76.22, Vc21a108.29, Vc21a145.19, Vc21p54.4, Vc21s40.43…	103	9109	363	52010	0.2837	2.00059e-07	****	4.28918e-06	****	Se vs Sa		GO:0047911	MF
183	GO:1901565	BP	organonitrogen compound catabolic process	Vc10a119.40, Vc1a311.33, Vc26p329.6, Vc36s268.40, Vc5a290.27, Vc6s140.37, Vc8a140.37, Vc8a35.40	8	1861	34	52010	0.2353	2.09143e-05	****	0.000169943	***	Ex vs Sa		183	GO:0005200	MF	structural constituent of cytoskeleton	Vc10a161.18, Vc11a8.21, Vc12a300.32, Vc13a108.11, Vc13a78.32, Vc15p329.28, Vc16a348.28, Vc16a381.41, Vc17a17.16, Vc17s221.33, Vc18a15.26, Vc18a48.38, Vc30a327.34, Vc31a295.31, Vc31a325.19, Vc32a266.23, Vc32s287.27, Vc34a256.31, Vc35a236.28, Vc44a240.22, Vc45a28.21, Vc45a31.32, Vc4a328.35, Vc5s288.39, Vc7a48.44, Vc7a59.35, Vc8p142.3	27	7813	60	52010	0.45	2.96995e-08	****	5.64129e-07	****	Ex vs Se		183	GO:0005507	MF	copper ion binding	Novel1272, Novel3486, Vc10a30.27, Vc10s377.34, Vc11a285.20, Vc11a349.43, Vc11a364.40, Vc12a18.36, Vc12a345.43, Vc14a389.31, Vc1556p0.0, Vc15p141.2, Vc16a386.40, Vc18p10.16, Vc19a26.20, Vc1p45.9, Vc23p28.5, Vc24a38.29, Vc24a52.36, Vc28a198.19, Vc28p330.2, Vc2a443.34, Vc31p328.11, Vc32s235.26, Vc33a198.35, Vc35a177.13, Vc35a270.26, Vc36a177.9, Vc36a56.31, Vc38a87.26, Vc3s79.31, Vc41a226.37, Vc41a27…	41	9109	106	52010	0.3868	2.07485e-07	****	4.42409e-06	****	Se vs Sa		GO:1901565	BP
184	GO:0016887	MF	ATP hydrolysis activity	Vc10p144.11, Vc11a54.15, Vc11s329.68, Vc11s329.75, Vc12a51.41, Vc14s46.29, Vc15a61.19, Vc15p269.4, Vc15p320.2, Vc16s74.45, Vc19a116.37, Vc19a156.18, Vc19p318.4, Vc19s348.58, Vc1a11.39, Vc20a115.29, Vc22a179.20, Vc22p242.4, Vc24a114.29, Vc24s329.29, Vc25s44.35, Vc26a287.15, Vc26p167.7, Vc28a239.25, Vc29p164.1, Vc29s266.27, Vc2a405.43, Vc2s62.24, Vc33a125.24, Vc33a81.36, Vc33s98.25, Vc34a25.19, Vc3…	59	1861	931	52010	0.0634	2.10347e-05	****	0.000169993	***	Ex vs Sa		184	GO:0005515	MF	protein binding	Novel0710, Novel1893, Novel3418, Vc10a174.12, Vc11a285.25, Vc11p302.2, Vc11p335.2, Vc11p335.5, Vc11p349.6, Vc126p0.2, Vc12a254.22, Vc12a356.30, Vc12s78.54, Vc13a19.18, Vc14a236.26, Vc14a256.31, Vc14a264.33, Vc14a76.19, Vc14a79.31, Vc14p380.8, Vc15a269.38, Vc15p286.2, Vc16s224.37, Vc17a17.16, Vc17a253.36, Vc17a69.41, Vc17s165.44, Vc17s59.28, Vc18s180.19, Vc19a317.42, Vc19a346.40, Vc19a36.26, Vc19a…	142	7813	607	52010	0.2339	3.08224e-08	****	5.82276e-07	****	Ex vs Se		184	GO:0006624	BP	vacuolar protein processing	Vc14a7.27, Vc153a2.51, Vc25a12.29, Vc2a18.16, Vc31a105.29, Vc320s0.45, Vc3a422.13, Vc74a2.36, Vc75a2.36, Vc79s1.41, Vc7s241.44, Vc81a5.33	12	9109	15	52010	0.8	2.22243e-07	****	4.71301e-06	****	Se vs Sa		GO:0016887	MF
185	GO:0004356	MF	glutamine synthetase activity	Vc11a323.40, Vc1a54.39, Vc33a118.14, Vc5a35.50, Vc8s363.46	5	1861	11	52010	0.4545	2.25003e-05	****	0.000178919	***	Ex vs Sa		185	GO:0004568	MF	chitinase activity	Vc12a10.30, Vc12a37.34, Vc12a382.41, Vc12p382.8, Vc23p16.4, Vc23s17.40, Vc25a163.31, Vc25a163.32, Vc25a163.34, Vc25a163.35, Vc30s82.54, Vc32s66.30, Vc35a54.42, Vc36a216.26, Vc41a264.29, Vc41p264.23, Vc42a213.43, Vc53a15.50, Vc53a15.52, Vc53p15.32, Vc583a0.14, Vc9a90.20	22	7813	43	52010	0.5116	3.11237e-08	****	5.84788e-07	****	Ex vs Se		185	GO:0009451	BP	RNA modification	Vc11s19.22, Vc11s45.27, Vc121p2.5, Vc14p175.1, Vc14p351.3, Vc14p384.7, Vc14s242.43, Vc15s53.36, Vc16p227.16, Vc17a278.16, Vc17p171.10, Vc17s237.25, Vc18s21.32, Vc198p0.7, Vc19s147.25, Vc19s148.27, Vc22s169.36, Vc23p303.2, Vc23s303.37, Vc24s323.27, Vc25a74.26, Vc26a347.24, Vc26a54.45, Vc26s115.41, Vc272s0.32, Vc28p216.4, Vc28s93.23, Vc29s317.36, Vc30s108.35, Vc32s101.42, Vc32s309.39, Vc33p146.9, V…	49	9109	137	52010	0.3577	2.48808e-07	****	5.24784e-06	****	Se vs Sa		GO:0004356	MF
186	GO:0006542	BP	glutamine biosynthetic process	Vc11a323.40, Vc1a54.39, Vc33a118.14, Vc5a35.50, Vc8s363.46	5	1861	11	52010	0.4545	2.25003e-05	****	0.000178919	***	Ex vs Sa		186	GO:0016688	MF	L-ascorbate peroxidase activity	Vc10s232.19, Vc11p309.17, Vc13s302.30, Vc18a14.24, Vc1s176.37, Vc24p92.1, Vc31s326.42, Vc32s76.26, Vc35a54.42, Vc36a216.26, Vc5a165.13, Vc6s228.38, Vc7a201.15, Vc7a50.34, Vc8a248.21, Vc9a90.20	16	7813	25	52010	0.64	3.45996e-08	****	6.46603e-07	****	Ex vs Se		186	GO:1901566	BP	organonitrogen compound biosynthetic process	Novel0671, Vc10a26.18, Vc10s114.37, Vc14a76.19, Vc14a79.31, Vc17p139.4, Vc187a1.47, Vc19a44.49, Vc1a416.35, Vc1s316.32, Vc211a0.22, Vc211a0.23, Vc22a197.17, Vc237a0.44, Vc25a61.24, Vc26a1.30, Vc27a9.10, Vc27p100.7, Vc27p357.7, Vc29a5.21, Vc2s399.76, Vc30a169.20, Vc32a151.27, Vc32p230.4, Vc33a310.30, Vc33a315.25, Vc33a325.27, Vc36a54.44, Vc37a220.47, Vc39a97.26, Vc43a171.21, Vc5a395.33, Vc5s294.35…	37	9109	92	52010	0.4022	2.52417e-07	****	5.29532e-06	****	Se vs Sa		GO:0006542	BP
187	GO:0106435	MF	carboxylesterase activity	Vc17s264.49, Vc30a321.23, Vc32a278.28, Vc34s112.27, Vc3s108.39	5	1861	11	52010	0.4545	2.25003e-05	****	0.000178919	***	Ex vs Sa		187	GO:0047268	MF	galactinol-raffinose galactosyltransferase activity	Vc11a394.26, Vc16a19.20, Vc18a367.20, Vc1a293.20, Vc24a3.27, Vc38s44.21, Vc39a40.28, Vc51a4.27, Vc6s374.24	9	7813	9	52010	1	3.88041e-08	****	7.213e-07	****	Ex vs Se		187	GO:0003849	MF	3-deoxy-7-phosphoheptulonate synthase activity	Vc12p239.1, Vc13a14.23, Vc16a328.28, Vc23a252.31, Vc30a270.32, Vc31s275.28, Vc34a235.26, Vc40p75.7, Vc41a65.20, Vc42a46.35, Vc7p79.3	11	9109	13	52010	0.8462	2.60269e-07	****	5.43086e-06	****	Se vs Sa		GO:0106435	MF
188	GO:0045165	BP	cell fate commitment	Novel0179, Vc1s251.29, Vc8a196.32, Vc8a196.33	4	1861	6	52010	0.6667	2.31324e-05	****	0.000181041	***	Ex vs Sa		188	GO:0008083	MF	growth factor activity	Vc13a112.29, Vc16a136.20, Vc21a249.36, Vc23s296.31, Vc29s235.27, Vc31a48.13, Vc32a262.26, Vc32a267.32, Vc33a107.21, Vc33a45.34, Vc7a300.25	11	7813	13	52010	0.8462	5.07098e-08	****	9.37592e-07	****	Ex vs Se		188	GO:0030163	BP	protein catabolic process	Vc11a399.36, Vc12a100.16, Vc12a60.43, Vc13a282.24, Vc15a391.61, Vc15s391.62, Vc16a164.21, Vc17s144.15, Vc17s6.46, Vc18a6.28, Vc19a24.33, Vc19a68.53, Vc20a24.34, Vc20a72.60, Vc21s15.41, Vc21s346.32, Vc21s347.28, Vc249a0.58, Vc27s142.28, Vc28a286.23, Vc28a332.27, Vc29s10.40, Vc29s324.39, Vc31a76.17, Vc31s301.46, Vc32a93.23, Vc33a305.26, Vc33s27.20, Vc34s171.17, Vc40a30.26, Vc40s32.49, Vc41p39.24, V…	42	9109	111	52010	0.3784	3.0205e-07	****	6.26914e-06	****	Se vs Sa		GO:0045165	BP
189	GO:0047216	MF	inositol 3-alpha-galactosyltransferase activity	Vc10s394.22, Vc1a7.44, Vc4a300.26, Vc5s7.37	4	1861	6	52010	0.6667	2.31324e-05	****	0.000181041	***	Ex vs Sa		189	GO:0015172	MF	acidic amino acid transmembrane transporter activity	Vc13s57.53, Vc16a1.31, Vc16a1.33, Vc16a348.29, Vc18a382.64, Vc30a312.21, Vc31a296.32, Vc32a306.27, Vc7a406.26, Vc7a59.34	10	7813	11	52010	0.9091	5.53198e-08	****	1.01206e-06	****	Ex vs Se		189	GO:0030003	BP	intracellular monoatomic cation homeostasis	Vc138a0.21, Vc16a256.16, Vc18a146.17, Vc1a44.30, Vc31a202.21, Vc31a211.16, Vc4a37.37, Vc5a43.25, Vc6s35.30, Vc7s187.31, Vc80a3.29, Vc8a372.32, Vc93a5.51, Vc9a12.33	14	9109	20	52010	0.7	3.37946e-07	****	6.94035e-06	****	Se vs Sa		GO:0047216	MF
190	GO:0016109	BP	tetraterpenoid biosynthetic process	Vc35s201.18, Vc36p156.4, Vc4s297.30, Vc9s266.31	4	1861	6	52010	0.6667	2.31324e-05	****	0.000181041	***	Ex vs Sa		190	GO:0031222	BP	arabinan catabolic process	Vc16a122.23, Vc17a227.19, Vc17s123.33, Vc18p273.2, Vc18s72.38, Vc31a30.33, Vc34a229.41, Vc7a310.16, Vc7a89.32, Vc8a395.25	10	7813	11	52010	0.9091	5.53198e-08	****	1.01206e-06	****	Ex vs Se		190	GO:0065008	BP	regulation of biological quality	Vc138a0.21, Vc16a256.16, Vc18a146.17, Vc1a44.30, Vc31a202.21, Vc31a211.16, Vc4a37.37, Vc5a43.25, Vc6s35.30, Vc7s187.31, Vc80a3.29, Vc8a372.32, Vc93a5.51, Vc9a12.33	14	9109	20	52010	0.7	3.37946e-07	****	6.94035e-06	****	Se vs Sa		GO:0016109	BP
191	GO:0022900	BP	electron transport chain	Vc10a342.30, Vc13s100.34, Vc1410a0.7, Vc146a1.41, Vc1a69.26, Vc20s273.27, Vc26p167.7, Vc28a94.28, Vc29p164.1, Vc2a369.26, Vc32a308.29, Vc38a209.33, Vc40a212.30, Vc42a8.27, Vc44s88.35, Vc5a56.26, Vc65a8.50, Vc791a0.4, Vc84p3.7, Vc8a353.26	20	1861	194	52010	0.1031	2.42679e-05	****	0.000188934	***	Ex vs Sa		191	GO:0090378	BP	seed trichome elongation	Novel2048, Vc10a105.22, Vc13a102.20, Vc13a108.11, Vc13a286.23, Vc13p97.14, Vc13s302.30, Vc14a256.29, Vc16a348.28, Vc17s268.41, Vc18a48.38, Vc19s130.30, Vc1a90.20, Vc20a72.59, Vc228p0.6, Vc27s245.38, Vc28a286.24, Vc28a45.24, Vc2a302.39, Vc31s268.44, Vc32a266.23, Vc32s76.26, Vc34s108.36, Vc36a172.20, Vc37a96.16, Vc3a111.29, Vc4a280.24, Vc54a12.26, Vc57a6.30, Vc57a7.37, Vc5a108.22, Vc5a307.21, Vc6a1…	37	7813	100	52010	0.37	5.6442e-08	****	1.02719e-06	****	Ex vs Se		191	GO:0042803	MF	protein homodimerization activity	Novel0763, Novel4811, Vc10a199.19, Vc10a34.29, Vc11s282.27, Vc13p7.3, Vc13s70.42, Vc140a1.34, Vc14a354.43, Vc14p50.7, Vc16a350.21, Vc16a67.37, Vc16p232.2, Vc18s329.39, Vc18s75.37, Vc19s313.32, Vc1a209.13, Vc21p261.1, Vc21s36.24, Vc22p173.7, Vc22s26.56, Vc23p62.21, Vc25a173.26, Vc26p250.19, Vc26p252.4, Vc26s37.44, Vc28s149.34, Vc29s37.23, Vc2a67.14, Vc30p263.5, Vc31a173.13, Vc31a298.23, Vc338a0.23…	65	9109	203	52010	0.3202	3.64146e-07	****	7.43926e-06	****	Se vs Sa		GO:0022900	BP
192	GO:1901362	BP	organic cyclic compound biosynthetic process	Novel4416, Vc156a2.43, Vc17a308.27, Vc27a274.28, Vc34s71.38, Vc38a282.38, Vc38s101.15, Vc50p7.9, Vc6a422.25	9	1861	45	52010	0.2	2.6064e-05	****	0.000200515	***	Ex vs Sa		192	GO:0046556	MF	alpha-L-arabinofuranosidase activity	Vc10a173.27, Vc11a32.30, Vc15a40.12, Vc16a122.23, Vc17a227.19, Vc17s123.33, Vc18p273.2, Vc18s72.38, Vc31a30.33, Vc34a229.41, Vc38a147.24, Vc6a275.33, Vc7a310.16, Vc7a89.32, Vc8a395.25	15	7813	23	52010	0.6522	6.47609e-08	****	1.17244e-06	****	Ex vs Se		192	GO:0140096	MF	catalytic activity, acting on a protein	Vc10a60.47, Vc11a301.19, Vc11a387.26, Vc12a100.19, Vc12a60.41, Vc12p375.8, Vc12s331.60, Vc12s332.36, Vc13a37.37, Vc1480a0.6, Vc14a172.30, Vc14a283.32, Vc14a95.25, Vc14s203.18, Vc15a390.25, Vc15s318.49, Vc17a228.35, Vc17s352.51, Vc18s236.23, Vc19a8.38, Vc1a368.30, Vc20a307.23, Vc20s10.37, Vc21a293.32, Vc21s175.40, Vc21s234.20, Vc21s73.30, Vc22a239.22, Vc22s320.40, Vc22s322.66, Vc23a13.16, Vc23p24.…	95	9109	333	52010	0.2853	4.44187e-07	****	9.02718e-06	****	Se vs Sa		GO:1901362	BP
193	GO:0005507	MF	copper ion binding	Vc100a4.58, Vc12a18.36, Vc14a278.15, Vc14a389.31, Vc17s19.29, Vc19a26.20, Vc259a0.49, Vc2a443.34, Vc33a254.26, Vc36s268.40, Vc38s2.56, Vc3s79.31, Vc41a276.29, Vc48p89.5	14	1861	106	52010	0.1321	2.61427e-05	****	0.000200515	***	Ex vs Sa		193	GO:0051017	BP	actin filament bundle assembly	Vc11a350.31, Vc12a44.31, Vc17s267.34, Vc20a44.41, Vc24a51.33, Vc28a310.43, Vc33a204.33, Vc36a72.30, Vc36a73.37, Vc38a0.13, Vc39a42.21, Vc6a35.25, Vc6s405.40, Vc80s3.39, Vc93s4.42, Vc9a344.27	16	7813	26	52010	0.6154	7.73298e-08	****	1.39274e-06	****	Ex vs Se		193	GO:0051015	MF	actin filament binding	Vc11a350.31, Vc14a215.24, Vc150s1.41, Vc17s267.34, Vc19a44.44, Vc21s344.21, Vc22p50.25, Vc24a51.33, Vc25a262.25, Vc26s336.36, Vc29s321.16, Vc2a148.30, Vc32s314.31, Vc33a204.33, Vc33s32.42, Vc35a216.21, Vc35a238.21, Vc36a72.30, Vc36a73.37, Vc38a0.13, Vc39a42.21, Vc3a304.37, Vc4a330.17, Vc4p310.2, Vc6a35.25, Vc6s405.40, Vc6s425.39, Vc80s3.39, Vc93s4.42, Vc9a344.27	30	9109	69	52010	0.4348	4.6062e-07	****	9.31264e-06	****	Se vs Sa		GO:0005507	MF
194	GO:0042761	BP	very long-chain fatty acid biosynthetic process	Vc11a356.35, Vc15a348.38, Vc24a45.33, Vc36a83.18, Vc4a358.29, Vc9a334.16	6	1861	18	52010	0.3333	2.66694e-05	****	0.000200515	***	Ex vs Sa		194	GO:0045493	BP	xylan catabolic process	Vc16a122.23, Vc17a227.19, Vc17s123.33, Vc18p273.2, Vc18s72.38, Vc31a30.33, Vc32p230.1, Vc34a229.41, Vc37p267.13, Vc38p8.9, Vc7a310.16, Vc7a89.32, Vc8a395.25	13	7813	18	52010	0.7222	7.97172e-08	****	1.42101e-06	****	Ex vs Se		194	GO:0009646	BP	response to absence of light	Vc10a375.26, Vc12a15.23, Vc12a31.26, Vc13a98.30, Vc14a236.21, Vc16a95.34, Vc18s75.37, Vc20a121.20, Vc23p364.3, Vc249s0.74, Vc25a239.19, Vc2a281.20, Vc31a338.28, Vc31a5.28, Vc38a282.38, Vc3a158.19, Vc42s58.46, Vc847a0.8	18	9109	31	52010	0.5806	4.68437e-07	****	9.33595e-06	****	Se vs Sa		GO:0042761	BP
195	GO:0008202	BP	steroid metabolic process	Vc17a308.27, Vc27a274.28, Vc34s71.38, Vc38a282.38, Vc50a6.32, Vc50p7.9	6	1861	18	52010	0.3333	2.66694e-05	****	0.000200515	***	Ex vs Sa		195	GO:0043168	MF	anion binding	Vc16p332.13, Vc18p65.8, Vc18s75.37, Vc31p279.8, Vc35a22.28, Vc36s260.34, Vc37a241.26, Vc38a71.31, Vc39a75.28, Vc4a65.46, Vc6a347.19, Vc7a86.36, Vc9s40.39	13	7813	18	52010	0.7222	7.97172e-08	****	1.42101e-06	****	Ex vs Se		195	GO:0033179	CC	proton-transporting V-type ATPase, V0 domain	Vc126a0.20, Vc12a59.41, Vc13s282.38, Vc16a207.28, Vc236a0.56, Vc23a351.31, Vc23p353.10, Vc27a341.32, Vc2s433.31, Vc2s434.26, Vc30a116.24, Vc31a322.33, Vc32a94.24, Vc42s195.27, Vc44s90.33, Vc7p45.10, Vc8a7.27, Vc93a4.31	18	9109	31	52010	0.5806	4.68437e-07	****	9.33595e-06	****	Se vs Sa		GO:0008202	BP
196	GO:0004066	MF	asparagine synthase (glutamine-hydrolyzing) activity	Vc22a294.17, Vc43a88.21, Vc43a95.21, Vc47a111.19, Vc629p0.6, Vc6p67.23	6	1861	18	52010	0.3333	2.66694e-05	****	0.000200515	***	Ex vs Sa		196	GO:0009695	BP	jasmonic acid biosynthetic process	Vc1139p0.1, Vc12a78.41, Vc12s40.56, Vc13a93.35, Vc16a95.34, Vc18a301.31, Vc20a121.20, Vc22a254.31, Vc23a357.24, Vc28a226.19, Vc29a9.33, Vc33s306.55, Vc40s9.40, Vc41s61.32, Vc43a132.31, Vc46a86.22, Vc47a69.25, Vc7a329.31	18	7813	32	52010	0.5625	8.29834e-08	****	1.47169e-06	****	Ex vs Se		196	GO:0009753	BP	response to jasmonic acid	Novel4490, Vc10a95.29, Vc12a15.23, Vc12a31.26, Vc12s40.56, Vc13a286.23, Vc148s2.69, Vc17p323.0, Vc17s219.15, Vc21a6.39, Vc23a334.27, Vc23a357.24, Vc23p364.3, Vc26a4.25, Vc29a1.29, Vc2a20.21, Vc30s280.35, Vc31s56.26, Vc32a98.23, Vc33a314.24, Vc34p141.22, Vc35a270.26, Vc36a201.19, Vc36a56.31, Vc3a420.19, Vc42a199.39, Vc45a200.22, Vc4a257.18, Vc4p252.16, Vc4p48.33, Vc5s318.22, Vc8a116.19	32	9109	76	52010	0.4211	4.68951e-07	****	9.33595e-06	****	Se vs Sa		GO:0004066	MF
197	GO:0009409	BP	response to cold	Vc10a224.21, Vc10a280.34, Vc10p322.0, Vc10s394.22, Vc13p97.14, Vc14a22.24, Vc17a163.18, Vc17a163.19, Vc19s130.30, Vc1a7.44, Vc1p90.7, Vc20a60.39, Vc22s268.28, Vc2a302.39, Vc2a333.29, Vc31p335.2, Vc32a296.18, Vc34a187.19, Vc38a182.23, Vc3a70.37, Vc45a129.27, Vc5a117.19, Vc5s7.37, Vc691a0.7	24	1861	261	52010	0.092	2.68178e-05	****	0.000200515	***	Ex vs Sa		197	GO:0019901	MF	protein kinase binding	Vc1248a0.5, Vc17s268.41, Vc19p364.10, Vc19s115.29, Vc20s114.35, Vc21a141.31, Vc22a311.33, Vc22a54.35, Vc22s294.21, Vc26a145.26, Vc27s245.38, Vc28s241.43, Vc29a142.29, Vc33a195.31, Vc34s108.36, Vc37p21.2, Vc39p277.12, Vc43p94.20, Vc46a158.31, Vc47a135.34, Vc47s111.25, Vc6p99.13	22	7813	45	52010	0.4889	8.95973e-08	****	1.58091e-06	****	Ex vs Se		197	GO:0016985	MF	mannan endo-1,4-beta-mannosidase activity	Vc10a93.19, Vc13a167.14, Vc17a4.32, Vc1a342.28, Vc30s209.40, Vc32p198.25, Vc34a289.32, Vc35a186.33, Vc36a168.19, Vc42a96.24, Vc45a64.28, Vc4a285.20, Vc5a320.23, Vc8a114.23, Vc9a250.27	15	9109	23	52010	0.6522	5.20885e-07	****	1.03172e-05	****	Se vs Sa		GO:0009409	BP
198	GO:0004144	MF	diacylglycerol O-acyltransferase activity	Vc14p357.28, Vc23a53.48, Vc23s53.56, Vc38a226.17, Vc38s226.22, Vc6a138.20, Vc6a138.21	7	1861	26	52010	0.2692	2.68342e-05	****	0.000200515	***	Ex vs Sa		198	GO:0009055	MF	electron transfer activity	Vc10a110.29, Vc10a342.30, Vc11a256.30, Vc11p349.6, Vc13a59.47, Vc146a1.41, Vc14s313.40, Vc16a67.37, Vc16s97.20, Vc17a140.19, Vc17s44.41, Vc18s329.39, Vc1a69.26, Vc1s320.35, Vc24p52.7, Vc25a311.40, Vc26p167.7, Vc28a278.37, Vc29p164.1, Vc2a369.26, Vc30a312.16, Vc31p328.11, Vc32a305.29, Vc32a308.29, Vc32s307.32, Vc34s318.28, Vc35a10.39, Vc35a306.31, Vc37a24.23, Vc37a75.26, Vc39a272.25, Vc3s42.34, Vc…	51	7813	162	52010	0.3148	9.94738e-08	****	1.74078e-06	****	Ex vs Se		198	GO:0010431	BP	seed maturation	Novel1225, Vc20a73.30, Vc22p332.4, Vc22p365.12, Vc28a286.28, Vc38a24.32, Vc3p15.8, Vc43a200.32, Vc43a40.55, Vc43p8.20, Vc46a167.31, Vc46a168.26, Vc46p167.5, Vc46p168.1, Vc46p201.21, Vc46s167.42, Vc47a159.40, Vc47p159.15, Vc47p159.4, Vc47p189.24, Vc889p0.2	21	9109	40	52010	0.525	5.26181e-07	****	1.03565e-05	****	Se vs Sa		GO:0004144	MF
199	GO:0004033	MF	aldo-keto reductase (NADP) activity	Vc36a220.40, Vc36a220.42, Vc36a221.38, Vc4a130.17, Vc4a131.33, Vc4a131.34, Vc9a86.32	7	1861	26	52010	0.2692	2.68342e-05	****	0.000200515	***	Ex vs Sa		199	GO:0015995	BP	chlorophyll biosynthetic process	Vc10a139.26, Vc10a174.12, Vc11a145.15, Vc132a2.36, Vc15a134.19, Vc15a146.25, Vc16a347.20, Vc18a49.30, Vc19a237.25, Vc1a258.34, Vc1a291.25, Vc1s46.41, Vc24a250.20, Vc29a33.33, Vc31a294.27, Vc35s201.18, Vc35s263.41, Vc36a83.20, Vc36p156.4, Vc40a57.13, Vc48s20.43, Vc4s297.30, Vc4s357.34, Vc5a174.25, Vc5a270.20, Vc5p40.16, Vc6s33.42, Vc8a371.36, Vc8p188.2, Vc9p333.2, Vc9s266.31	31	7813	78	52010	0.3974	9.96591e-08	****	1.74078e-06	****	Ex vs Se		199	GO:0006119	BP	oxidative phosphorylation	Vc124a3.48, Vc13s159.19, Vc14a264.33, Vc17a140.19, Vc17p362.19, Vc22a368.31, Vc27a326.40, Vc27s152.15, Vc2a233.19, Vc2s302.48, Vc30a312.16, Vc32s204.30, Vc32s307.32, Vc34a6.38, Vc36s203.32, Vc3a104.26, Vc42a6.35, Vc42s90.21, Vc43a5.30, Vc47p192.8	20	9109	37	52010	0.5405	5.28174e-07	****	1.03565e-05	****	Se vs Sa		GO:0004033	MF
200	GO:0098661	BP	inorganic anion transmembrane transport	Vc10a278.16, Vc17s350.31, Vc27a313.28, Vc34s32.27, Vc44a192.19, Vc8a295.12	6	1861	19	52010	0.3158	3.77961e-05	****	0.000281014	***	Ex vs Sa		200	GO:0009750	BP	response to fructose	Vc115p2.20, Vc11a233.23, Vc15a227.19, Vc16a390.30, Vc18s145.24, Vc22a294.17, Vc24a160.31, Vc28s33.38, Vc31a334.43, Vc43a88.21, Vc43a95.21, Vc47a111.19, Vc7a143.23, Vc7a7.36	14	7813	21	52010	0.6667	1.19684e-07	****	2.08011e-06	****	Ex vs Se		200	GO:0002238	BP	response to molecule of fungal origin	Vc1169p0.0, Vc11s212.32, Vc1260a0.2, Vc148s2.69, Vc15p117.19, Vc15s205.28, Vc16a381.32, Vc17s337.47, Vc191s1.61, Vc20a269.18, Vc21a123.22, Vc21p224.11, Vc22a31.32, Vc26a126.26, Vc26s221.41, Vc28a184.20, Vc28a99.17, Vc29a124.18, Vc29s213.42, Vc2a400.29, Vc2s416.46, Vc31a324.32, Vc32a98.23, Vc33a131.36, Vc33a278.40, Vc33p213.10, Vc33s291.32, Vc34s136.41, Vc36s283.39, Vc38a291.14, Vc3a29.38, Vc3s6.5…	40	9109	106	52010	0.3774	6.20319e-07	****	1.21024e-05	****	Se vs Sa		GO:0098661	BP
201	GO:0071949	MF	FAD binding	Novel0044, Vc11p246.8, Vc15p242.0, Vc15p243.0, Vc19p288.0, Vc19p289.3, Vc24s144.40, Vc2a214.23, Vc2a214.29, Vc35s263.41, Vc36a83.20, Vc38a288.35, Vc3a229.19, Vc9p333.2	14	1861	110	52010	0.1273	3.9786e-05	****	0.000294337	***	Ex vs Sa		201	GO:0004470	MF	malic enzyme activity	Vc139a1.25, Vc187a1.54, Vc22s26.56, Vc26a0.15, Vc30s68.47, Vc33a316.14, Vc33a324.17, Vc35a283.38, Vc35a307.23, Vc36a42.30, Vc4s420.28, Vc9a396.27	12	7813	16	52010	0.75	1.31575e-07	****	2.2754e-06	****	Ex vs Se		201	GO:0003755	MF	peptidyl-prolyl cis-trans isomerase activity	Vc10s385.49, Vc11a8.20, Vc11p324.1, Vc12s17.27, Vc13a131.20, Vc13p8.4, Vc14s362.36, Vc15p19.18, Vc16s182.34, Vc17s260.46, Vc19a363.26, Vc21s126.49, Vc22a313.30, Vc22p35.40, Vc22s87.36, Vc23s142.25, Vc24a70.29, Vc26a129.38, Vc26s78.33, Vc28a132.25, Vc29a127.24, Vc29a80.32, Vc2p377.6, Vc2s274.27, Vc30p264.5, Vc30p264.6, Vc30s233.32, Vc31s56.30, Vc32a121.33, Vc32p106.5, Vc32s238.26, Vc33a210.31, Vc3…	52	9109	153	52010	0.3399	6.81646e-07	****	1.32328e-05	****	Se vs Sa		GO:0071949	MF
202	GO:0016210	MF	naringenin-chalcone synthase activity	Vc13a46.32, Vc30a303.29, Vc32a318.21	3	1861	3	52010	1	4.57407e-05	****	0.000328582	***	Ex vs Sa		202	GO:0005839	CC	proteasome core complex	Vc10a331.29, Vc1141a0.6, Vc148s2.72, Vc14s205.36, Vc18a374.25, Vc1a192.21, Vc1a80.26, Vc22s37.46, Vc23a121.37, Vc23a126.32, Vc25s254.33, Vc2p242.18, Vc35a73.33, Vc3a193.18, Vc40a266.26, Vc41a249.32, Vc5a66.13, Vc8a230.30, Vc8a344.24	19	7813	36	52010	0.5278	1.42594e-07	****	2.45375e-06	****	Ex vs Se		202	GO:0008271	MF	secondary active sulfate transmembrane transporter activity	Vc12a336.20, Vc17s350.31, Vc19p56.29, Vc27a313.28, Vc34s32.27, Vc35a35.27, Vc36s273.38, Vc40a231.20, Vc41s215.25, Vc44a192.19, Vc4s53.29, Vc9s29.24	12	9109	16	52010	0.75	7.45909e-07	****	1.41977e-05	****	Se vs Sa		GO:0016210	MF
203	GO:0050350	MF	trihydroxystilbene synthase activity	Vc13a46.32, Vc30a303.29, Vc32a318.21	3	1861	3	52010	1	4.57407e-05	****	0.000328582	***	Ex vs Sa		203	GO:0006694	BP	steroid biosynthetic process	Vc1102p0.1, Vc13a67.37, Vc14a46.20, Vc15a308.29, Vc17s293.34, Vc19a366.36, Vc228p0.6, Vc22a38.50, Vc25a44.25, Vc26a16.35, Vc29a16.15, Vc2a63.19, Vc30a338.22, Vc32a297.40, Vc33p299.18, Vc35p293.6, Vc36a33.15, Vc37a289.46, Vc39a12.37, Vc3a382.28, Vc41a202.24, Vc49a33.38, Vc526p0.3, Vc9p377.29	24	7813	53	52010	0.4528	1.48838e-07	****	2.54857e-06	****	Ex vs Se		203	GO:0008509	MF	monoatomic anion transmembrane transporter activity	Vc12a336.20, Vc17s350.31, Vc19p56.29, Vc27a313.28, Vc34s32.27, Vc35a35.27, Vc36s273.38, Vc40a231.20, Vc41s215.25, Vc44a192.19, Vc4s53.29, Vc9s29.24	12	9109	16	52010	0.75	7.45909e-07	****	1.41977e-05	****	Se vs Sa		GO:0050350	MF
204	GO:0102128	MF	chalcone synthase activity	Vc13a46.32, Vc30a303.29, Vc32a318.21	3	1861	3	52010	1	4.57407e-05	****	0.000328582	***	Ex vs Sa		204	GO:0140662	MF	ATP-dependent protein folding chaperone	Vc106a4.43, Vc1081a0.8, Vc11a232.27, Vc11p330.36, Vc136a1.27, Vc14a307.32, Vc157a2.45, Vc16a288.25, Vc16p293.20, Vc18p273.2, Vc18s120.45, Vc199p0.5, Vc19a348.55, Vc19s348.58, Vc21a152.24, Vc21a51.38, Vc22a115.30, Vc24a161.24, Vc24a84.33, Vc25a357.28, Vc26a155.35, Vc26a52.34, Vc27s351.28, Vc29a29.27, Vc29a52.36, Vc29p153.14, Vc2a360.27, Vc2s150.26, Vc31a232.33, Vc33a185.36, Vc33a283.25, Vc35a306.3…	53	7813	173	52010	0.3064	1.52407e-07	****	2.59689e-06	****	Ex vs Se		204	GO:0005460	MF	UDP-glucose transmembrane transporter activity	Vc13a252.24, Vc14s141.21, Vc21a317.34, Vc25a219.17, Vc26a309.28, Vc29a297.28, Vc2s192.39, Vc30a150.47, Vc32a142.28, Vc37a110.25, Vc37s125.15, Vc3a249.22	12	9109	16	52010	0.75	7.45909e-07	****	1.41977e-05	****	Se vs Sa		GO:0102128	MF
205	GO:0009801	BP	cinnamic acid ester metabolic process	Vc14s354.49, Vc36p225.9, Vc552s0.9	3	1861	3	52010	1	4.57407e-05	****	0.000328582	***	Ex vs Sa		205	GO:0005985	BP	sucrose metabolic process	Vc12a363.24, Vc12s128.53, Vc13p394.9, Vc159a0.22, Vc22p365.12, Vc23s287.27, Vc23s43.39, Vc30p0.1, Vc40a55.29, Vc40s261.37, Vc41s14.32, Vc41s246.36, Vc43p8.20, Vc46p201.21, Vc47p189.24, Vc6a194.23, Vc71p6.8	17	7813	30	52010	0.5667	1.64859e-07	****	2.79536e-06	****	Ex vs Se		205	GO:0047372	MF	acylglycerol lipase activity	Vc14s309.28, Vc16p26.5, Vc1a421.18, Vc2s361.33, Vc37a172.29, Vc38a136.22, Vc39a142.20, Vc5a399.21, Vc665a0.12, Vc6a284.24, Vc6a64.35, Vc8s30.29	12	9109	16	52010	0.75	7.45909e-07	****	1.41977e-05	****	Se vs Sa		GO:0009801	BP
206	GO:0046278	BP	3,4-dihydroxybenzoate metabolic process	Vc14s354.49, Vc36p225.9, Vc552s0.9	3	1861	3	52010	1	4.57407e-05	****	0.000328582	***	Ex vs Sa		206	GO:0000166	MF	nucleotide binding	Vc10a119.40, Vc10a387.25, Vc10a7.40, Vc11a28.38, Vc12p138.6, Vc12s139.44, Vc14a221.28, Vc14a289.25, Vc1a16.36, Vc1a439.25, Vc22a77.23, Vc25a269.25, Vc25a320.39, Vc25a332.27, Vc2a334.29, Vc2s257.32, Vc333a0.32, Vc34a289.32, Vc34s71.35, Vc35s201.18, Vc36p156.4, Vc37a254.28, Vc37s23.34, Vc39s273.32, Vc3a178.28, Vc3a69.29, Vc44s221.28, Vc47s126.45, Vc4a11.38, Vc4a3.28, Vc4p32.6, Vc4s297.30, Vc5a14.25…	42	7813	125	52010	0.336	1.76281e-07	****	2.97452e-06	****	Ex vs Se		206	GO:0098659	BP	inorganic cation import across plasma membrane	Vc138a0.21, Vc16a256.16, Vc17a253.36, Vc18a146.17, Vc1a44.30, Vc27a234.30, Vc31a202.21, Vc31a211.16, Vc45a231.30, Vc4a37.37, Vc5a43.25, Vc6s35.30, Vc7s187.31, Vc80a3.29, Vc8a372.32, Vc93a5.51, Vc9a12.33	17	9109	29	52010	0.5862	8.13156e-07	****	1.54026e-05	****	Se vs Sa		GO:0046278	BP
207	GO:0102816	MF	UDP-D-glucose:delphinidin 3-O-glucosyl-5-O-caffeoylglucoside -O-beta-D-glucosyltransferase activity	Vc36p225.11, Vc36s226.33, Vc4p123.16	3	1861	3	52010	1	4.57407e-05	****	0.000328582	***	Ex vs Sa		207	GO:1905039	BP	carboxylic acid transmembrane transport	Vc10p196.15, Vc13s57.53, Vc14s344.50, Vc16a1.31, Vc16a1.33, Vc16a348.29, Vc18a382.64, Vc18s48.44, Vc19a43.41, Vc19s65.38, Vc20p35.35, Vc23p356.19, Vc25a211.24, Vc28a321.33, Vc2a200.31, Vc2a443.35, Vc30a312.21, Vc31a296.32, Vc32a306.27, Vc38a138.24, Vc48a81.31, Vc7a406.26, Vc7a59.34	23	7813	50	52010	0.46	1.89029e-07	****	3.15896e-06	****	Ex vs Se		207	GO:0004619	MF	phosphoglycerate mutase activity	Novel5013, Vc14a185.28, Vc17p11.5, Vc27p10.1, Vc2a226.19, Vc34s283.21, Vc45s58.30, Vc72a1.20	8	9109	8	52010	1	8.83017e-07	****	1.64073e-05	****	Se vs Sa		GO:0102816	MF
208	GO:0042803	MF	protein homodimerization activity	Novel3539, Novel4416, Vc13a46.32, Vc16a26.46, Vc18a376.35, Vc25a173.26, Vc2a67.14, Vc30a303.29, Vc32a318.21, Vc35a1.21, Vc37a238.15, Vc39a82.12, Vc3a334.17, Vc42a14.30, Vc4p104.3, Vc54a12.26, Vc57a6.30, Vc57a7.37, Vc7p401.11, Vc9p64.0	20	1861	203	52010	0.0985	4.6468e-05	****	0.000332201	***	Ex vs Sa		208	GO:0004650	MF	polygalacturonase activity	Vc14a350.33, Vc16s51.45, Vc17a343.51, Vc20a352.37, Vc21a51.39, Vc22p82.4, Vc28a25.27, Vc29a52.37, Vc2a404.33, Vc2s259.35, Vc33a283.24, Vc34a39.33, Vc37a181.25, Vc38a127.30, Vc39a133.33, Vc43a7.29, Vc43s8.49, Vc44a16.23, Vc454s0.28, Vc46a202.32, Vc49a28.31, Vc645p0.4, Vc6s295.42	23	7813	50	52010	0.46	1.89029e-07	****	3.15896e-06	****	Ex vs Se		208	GO:0006007	BP	glucose catabolic process	Novel5013, Vc14a185.28, Vc17p11.5, Vc27p10.1, Vc2a226.19, Vc34s283.21, Vc45s58.30, Vc72a1.20	8	9109	8	52010	1	8.83017e-07	****	1.64073e-05	****	Se vs Sa		GO:0042803	MF
209	GO:0006541	BP	glutamine metabolic process	Vc11a222.37, Vc15a215.31, Vc20a11.26, Vc22a294.17, Vc24a170.24, Vc43a88.21, Vc43a95.21, Vc47a111.19, Vc48s100.43, Vc82a5.34	10	1861	60	52010	0.1667	4.94903e-05	****	0.000352115	***	Ex vs Sa		209	GO:0050660	MF	flavin adenine dinucleotide binding	Vc10a280.34, Vc12p345.9, Vc14a115.38, Vc14s112.39, Vc16s262.34, Vc16s97.20, Vc17p143.0, Vc17s143.21, Vc17s219.15, Vc18s100.32, Vc20a11.26, Vc21a254.23, Vc21a71.25, Vc22a42.34, Vc23a28.33, Vc23a292.22, Vc25a146.28, Vc26a247.18, Vc26a277.21, Vc27p200.0, Vc27s271.27, Vc286s0.55, Vc28a340.35, Vc29p240.3, Vc30a80.26, Vc30a80.27, Vc31a34.26, Vc32a15.27, Vc33a51.22, Vc34p156.4, Vc34s207.24, Vc36s238.20,…	46	7813	143	52010	0.3217	2.03272e-07	****	3.3795e-06	****	Ex vs Se		209	GO:0102070	MF	18-hydroxyoleate peroxygenase activity	Vc19a92.24, Vc1s138.31, Vc35a10.38, Vc36a252.35, Vc4a85.34, Vc5a126.29, Vc8a283.29, Vc9a49.38	8	9109	8	52010	1	8.83017e-07	****	1.64073e-05	****	Se vs Sa		GO:0006541	BP
210	GO:0080162	BP	endoplasmic reticulum to cytosol auxin transport	Vc13a33.40, Vc30a289.21, Vc32s331.35, Vc34a291.26, Vc40p276.4, Vc42s27.54	6	1861	20	52010	0.3	5.23578e-05	****	0.000357681	***	Ex vs Sa		210	GO:0033076	BP	isoquinoline alkaloid metabolic process	Vc211a0.22, Vc211a0.23, Vc22a197.17, Vc23a330.25, Vc2s399.76, Vc30a169.20, Vc32a151.27, Vc36a54.44, Vc40a12.24, Vc43a171.21, Vc47a7.20	11	7813	14	52010	0.7857	2.0417e-07	****	3.3795e-06	****	Ex vs Se		210	GO:1990137	MF	plant seed peroxidase activity	Vc19a92.24, Vc1s138.31, Vc35a10.38, Vc36a252.35, Vc4a85.34, Vc5a126.29, Vc8a283.29, Vc9a49.38	8	9109	8	52010	1	8.83017e-07	****	1.64073e-05	****	Se vs Sa		GO:0080162	BP
211	GO:0102483	MF	scopolin beta-glucosidase activity	Vc15a315.27, Vc17s360.29, Vc24a72.33, Vc34a21.31, Vc4p419.17, Vc9a397.25	6	1861	20	52010	0.3	5.23578e-05	****	0.000357681	***	Ex vs Sa		211	GO:0000976	MF	transcription cis-regulatory region binding	Novel3913, Vc1069a0.8, Vc11s282.27, Vc12a358.27, Vc130a1.37, Vc13a111.16, Vc13s257.23, Vc15a266.29, Vc15a339.25, Vc16p355.5, Vc17a52.12, Vc17s166.24, Vc18p40.7, Vc19s313.32, Vc20a167.17, Vc20a170.21, Vc20a54.31, Vc21a2.29, Vc21a363.31, Vc22a341.40, Vc22a41.25, Vc23a40.19, Vc23p326.0, Vc24a51.34, Vc24s118.41, Vc25a40.21, Vc26p350.1, Vc28a156.23, Vc28a304.28, Vc29a312.19, Vc29a338.24, Vc2a57.23, Vc…	75	7813	279	52010	0.2688	2.14334e-07	****	3.52593e-06	****	Ex vs Se		211	GO:0033075	BP	isoquinoline alkaloid biosynthetic process	Vc12p83.4, Vc16a366.33, Vc17s291.34, Vc19a286.27, Vc22s33.65, Vc23s327.43, Vc32a205.18, Vc33a146.17, Vc37a215.20, Vc37p212.7, Vc38a95.28, Vc39a102.25, Vc40a15.26, Vc40p15.17, Vc42a90.16, Vc42p53.1, Vc57s9.35, Vc6a318.16, Vc8a85.28	19	9109	35	52010	0.5429	9.31909e-07	****	1.72337e-05	****	Se vs Sa		GO:0102483	MF
212	GO:0015114	MF	phosphate ion transmembrane transporter activity	Vc10a278.16, Vc27a362.29, Vc34a98.23, Vc8a295.12	4	1861	7	52010	0.5714	5.24375e-05	****	0.000357681	***	Ex vs Sa		212	GO:0010431	BP	seed maturation	Novel1225, Vc19s12.31, Vc20a73.30, Vc22p332.4, Vc22p365.12, Vc28a286.28, Vc3p15.8, Vc43a40.55, Vc43p8.20, Vc46a167.31, Vc46a168.26, Vc46p167.5, Vc46p168.1, Vc46p201.21, Vc46s167.42, Vc47a159.40, Vc47p159.15, Vc47p159.4, Vc47p189.24, Vc889p0.2	20	7813	40	52010	0.5	2.15045e-07	****	3.52593e-06	****	Ex vs Se		212	GO:0090378	BP	seed trichome elongation	Vc10a105.22, Vc10a245.21, Vc10a345.26, Vc12p44.1, Vc13a102.20, Vc13a108.11, Vc13a286.23, Vc13s302.30, Vc14a256.29, Vc16a348.28, Vc17s268.41, Vc18a48.38, Vc20a72.59, Vc228p0.6, Vc27s245.38, Vc28a286.24, Vc28a45.24, Vc2a302.39, Vc31s268.44, Vc32a266.23, Vc32s76.26, Vc34s108.36, Vc36a172.20, Vc37a244.21, Vc37a96.16, Vc3a111.29, Vc42a184.30, Vc48a49.41, Vc4a280.24, Vc57a7.37, Vc5a156.22, Vc5a307.21, …	38	9109	100	52010	0.38	9.55959e-07	****	1.75125e-05	****	Se vs Sa		GO:0015114	MF
213	GO:0043733	MF	DNA-3-methylbase glycosylase activity	Vc11a222.37, Vc15a215.31, Vc24a170.24, Vc82a5.34	4	1861	7	52010	0.5714	5.24375e-05	****	0.000357681	***	Ex vs Sa		213	GO:0030638	BP	polyketide metabolic process	Novel3539, Novel4416, Vc25a173.26, Vc2a67.14, Vc35a1.21, Vc3a334.17, Vc4p104.3, Vc9p64.0	8	7813	8	52010	1	2.58538e-07	****	4.0849e-06	****	Ex vs Se		213	GO:0009505	CC	plant-type cell wall	Vc1127a0.6, Vc117a2.46, Vc11a116.15, Vc11p90.11, Vc126s3.69, Vc12a345.43, Vc16a218.19, Vc18a187.21, Vc1s45.29, Vc20s2.37, Vc23p28.5, Vc25a316.26, Vc27a117.22, Vc27a245.30, Vc27a35.20, Vc2a320.20, Vc31s155.33, Vc32s306.42, Vc34a19.23, Vc34a194.19, Vc34s108.37, Vc35a117.34, Vc35a206.17, Vc37a166.16, Vc3p36.24, Vc3s61.30, Vc3s84.52, Vc41a226.37, Vc42p5.10, Vc44s88.34, Vc4a226.32, Vc4a301.26, Vc56a3.…	38	9109	100	52010	0.38	9.55959e-07	****	1.75125e-05	****	Se vs Sa		GO:0043733	MF
214	GO:0046274	BP	lignin catabolic process	Vc14a278.15, Vc17s19.29, Vc38s2.56, Vc3s79.31	4	1861	7	52010	0.5714	5.24375e-05	****	0.000357681	***	Ex vs Sa		214	GO:0004619	MF	phosphoglycerate mutase activity	Novel5013, Vc14a185.28, Vc17p11.5, Vc27p10.1, Vc2a226.19, Vc34s283.21, Vc45s58.30, Vc72a1.20	8	7813	8	52010	1	2.58538e-07	****	4.0849e-06	****	Ex vs Se		214	GO:0005978	BP	glycogen biosynthetic process	Vc10s4.44, Vc12a38.26, Vc12a66.22, Vc12a9.25, Vc1s442.37, Vc2s154.34, Vc30a126.31, Vc42p186.12, Vc5s421.33, Vc761p0.0, Vc8s4.37	11	9109	14	52010	0.7857	1.02031e-06	****	1.85174e-05	****	Se vs Sa		GO:0046274	BP
215	GO:1901428	BP	regulation of syringal lignin biosynthetic process	Vc21a112.20, Vc21a112.21, Vc29a112.21, Vc33a226.20	4	1861	7	52010	0.5714	5.24375e-05	****	0.000357681	***	Ex vs Sa		215	GO:0006007	BP	glucose catabolic process	Novel5013, Vc14a185.28, Vc17p11.5, Vc27p10.1, Vc2a226.19, Vc34s283.21, Vc45s58.30, Vc72a1.20	8	7813	8	52010	1	2.58538e-07	****	4.0849e-06	****	Ex vs Se		215	GO:0033076	BP	isoquinoline alkaloid metabolic process	Vc12a84.45, Vc211a0.22, Vc211a0.23, Vc22a197.17, Vc2s399.76, Vc30a169.20, Vc32a151.27, Vc36a54.44, Vc41a56.37, Vc43a171.21, Vc47a7.20	11	9109	14	52010	0.7857	1.02031e-06	****	1.85174e-05	****	Se vs Sa		GO:1901428	BP
216	GO:1902438	BP	response to vanadate(3-)	Vc21p224.11, Vc28s139.28, Vc29s213.42, Vc33a131.36	4	1861	7	52010	0.5714	5.24375e-05	****	0.000357681	***	Ex vs Sa		216	GO:0006714	BP	sesquiterpenoid metabolic process	Vc14s19.34, Vc22a197.17, Vc25s25.33, Vc37s189.25, Vc3a410.20, Vc43a171.21, Vc46p82.24, Vc47a7.20	8	7813	8	52010	1	2.58538e-07	****	4.0849e-06	****	Ex vs Se		216	GO:0006629	BP	lipid metabolic process	Novel1225, Vc10a128.22, Vc10a131.14, Vc10s131.20, Vc10s186.25, Vc11p20.10, Vc11p255.8, Vc12s17.27, Vc132p0.16, Vc14a289.25, Vc14p384.7, Vc14p384.8, Vc14s111.28, Vc17a96.18, Vc17s365.24, Vc17s9.31, Vc18s236.23, Vc19a153.16, Vc19a94.25, Vc1a247.15, Vc1a302.27, Vc20a143.30, Vc21s122.29, Vc22a109.15, Vc22a7.22, Vc24a110.27, Vc25a184.27, Vc25p7.1, Vc26a236.28, Vc26s126.29, Vc27s155.36, Vc27s329.41, Vc…	73	9109	243	52010	0.3004	1.14321e-06	****	2.06519e-05	****	Se vs Sa		GO:1902438	BP
217	GO:0045793	BP	positive regulation of cell size	Vc35s201.18, Vc36p156.4, Vc4s297.30, Vc9s266.31	4	1861	7	52010	0.5714	5.24375e-05	****	0.000357681	***	Ex vs Sa		217	GO:0016115	BP	terpenoid catabolic process	Vc14s19.34, Vc22a197.17, Vc25s25.33, Vc37s189.25, Vc3a410.20, Vc43a171.21, Vc46p82.24, Vc47a7.20	8	7813	8	52010	1	2.58538e-07	****	4.0849e-06	****	Ex vs Se		217	GO:0009635	BP	response to herbicide	Novel0824, Novel4218, Vc18p147.3, Vc19a32.35, Vc19s32.42, Vc20a33.37, Vc22a39.37, Vc23a128.29, Vc23p119.12, Vc27s271.27, Vc28a324.47, Vc28a324.50, Vc612a0.9, Vc6a205.31, Vc7p146.2	15	9109	24	52010	0.625	1.16274e-06	****	2.09079e-05	****	Se vs Sa		GO:0045793	BP
218	GO:0015562	MF	efflux transmembrane transporter activity	Vc38a182.23, Vc54a12.26, Vc57a6.30, Vc57a7.37	4	1861	7	52010	0.5714	5.24375e-05	****	0.000357681	***	Ex vs Sa		218	GO:0043288	BP	apocarotenoid metabolic process	Vc14s19.34, Vc22a197.17, Vc25s25.33, Vc37s189.25, Vc3a410.20, Vc43a171.21, Vc46p82.24, Vc47a7.20	8	7813	8	52010	1	2.58538e-07	****	4.0849e-06	****	Ex vs Se		218	GO:0034486	BP	vacuolar transmembrane transport	Vc138a0.21, Vc16a256.16, Vc18a146.17, Vc31a202.21, Vc35p301.2, Vc36p21.9, Vc4a37.37, Vc4p427.6, Vc9a12.33, Vc9p389.3	10	9109	12	52010	0.8333	1.26257e-06	****	2.25989e-05	****	Se vs Sa		GO:0015562	MF
219	GO:0015267	MF	channel activity	Vc10a342.30, Vc20a207.33, Vc225a1.30, Vc28a142.19, Vc28a292.34, Vc35a94.33, Vc44a148.41, Vc47a66.24, Vc48a56.38	9	1861	49	52010	0.1837	5.31354e-05	****	0.000360787	***	Ex vs Sa		219	GO:0120254	BP	olefinic compound metabolic process	Vc14s19.34, Vc22a197.17, Vc25s25.33, Vc37s189.25, Vc3a410.20, Vc43a171.21, Vc46p82.24, Vc47a7.20	8	7813	8	52010	1	2.58538e-07	****	4.0849e-06	****	Ex vs Se		219	GO:1990544	BP	mitochondrial ATP transmembrane transport	Vc11a42.14, Vc21a7.18, Vc26a4.26, Vc29p1.6, Vc33a313.35, Vc35a303.33, Vc36a19.34, Vc4a425.42, Vc9a391.27	9	9109	10	52010	0.9	1.302e-06	****	2.31981e-05	****	Se vs Sa		GO:0015267	MF
220	GO:0046395	BP	carboxylic acid catabolic process	Vc14s19.34, Vc25s25.33, Vc26p329.6, Vc37s189.25, Vc3a410.20, Vc6s140.37, Vc8a35.40	7	1861	29	52010	0.2414	5.7954e-05	****	0.000391716	***	Ex vs Sa		220	GO:1902644	BP	tertiary alcohol metabolic process	Vc14s19.34, Vc22a197.17, Vc25s25.33, Vc37s189.25, Vc3a410.20, Vc43a171.21, Vc46p82.24, Vc47a7.20	8	7813	8	52010	1	2.58538e-07	****	4.0849e-06	****	Ex vs Se		220	GO:1901137	BP	carbohydrate derivative biosynthetic process	Vc148s1.45, Vc17a337.44, Vc27a300.32, Vc34a45.21, Vc38p295.25, Vc50s27.35, Vc530p0.4, Vc55a10.22, Vc56p7.13, Vc5s373.33, Vc61a7.13, Vc70s2.31, Vc95s4.47	13	9109	19	52010	0.6842	1.36074e-06	****	2.40254e-05	****	Se vs Sa		GO:0046395	BP
221	GO:0009095	BP	aromatic amino acid family biosynthetic process, prephenate pathway	Vc11a288.26, Vc15a272.36, Vc19a320.28, Vc24a111.29, Vc47p59.3	5	1861	13	52010	0.3846	5.9027e-05	****	0.000393602	***	Ex vs Sa		221	GO:0008146	MF	sulfotransferase activity	Novel4396, Vc18s223.24, Vc21a178.20, Vc22a89.30, Vc22a89.31, Vc26a179.20, Vc29s172.30, Vc33a170.17, Vc35p253.1, Vc36p97.1, Vc3s7.44, Vc4p345.6, Vc7s254.22, Vc9p321.4	14	7813	22	52010	0.6364	2.83297e-07	****	4.41587e-06	****	Ex vs Se		221	GO:0060918	BP	auxin transport	Vc17s301.30, Vc18a348.32, Vc18s75.37, Vc21a322.25, Vc21a6.39, Vc26a314.29, Vc26a4.25, Vc27s268.37, Vc29a1.29, Vc33a314.24, Vc34s77.41, Vc44a194.25, Vc50a0.30	13	9109	19	52010	0.6842	1.36074e-06	****	2.40254e-05	****	Se vs Sa		GO:0009095	BP
222	GO:0047769	MF	arogenate dehydratase activity	Vc11a288.26, Vc15a272.36, Vc19a320.28, Vc24a111.29, Vc47p59.3	5	1861	13	52010	0.3846	5.9027e-05	****	0.000393602	***	Ex vs Sa		222	GO:0019953	BP	sexual reproduction	Vc13a314.21, Vc20p29.3, Vc21p97.3, Vc21s90.36, Vc26a88.29, Vc26p95.5, Vc29p89.15, Vc29p96.2, Vc30p83.11, Vc33a248.38, Vc33p241.8, Vc42a212.24, Vc48a87.31, Vc4a299.25	14	7813	22	52010	0.6364	2.83297e-07	****	4.41587e-06	****	Ex vs Se		222	GO:0051603	BP	proteolysis involved in protein catabolic process	Vc12a390.20, Vc148s2.72, Vc14a7.27, Vc153a2.51, Vc16a25.28, Vc18a374.25, Vc23a121.37, Vc23a126.32, Vc24a96.24, Vc25a12.29, Vc2a18.16, Vc2p242.18, Vc306s0.50, Vc31a105.29, Vc320s0.45, Vc35a73.33, Vc3a422.13, Vc74a2.36, Vc75a2.36, Vc79s1.41, Vc7s241.44, Vc81a5.33	22	9109	45	52010	0.4889	1.38493e-06	****	2.42332e-05	****	Se vs Sa		GO:0047769	MF
223	GO:0003849	MF	3-deoxy-7-phosphoheptulonate synthase activity	Vc16a328.28, Vc18p70.25, Vc31s275.28, Vc34a235.26, Vc7p79.3	5	1861	13	52010	0.3846	5.9027e-05	****	0.000393602	***	Ex vs Sa		223	GO:0016102	BP	diterpenoid biosynthetic process	Vc156a1.31, Vc15a369.30, Vc19a379.34, Vc24a26.32, Vc35a89.23, Vc35s90.60, Vc39p78.6, Vc39s79.31, Vc4a177.21, Vc4a177.22, Vc4s177.24, Vc4s180.34, Vc6s2.45, Vc9s134.43	14	7813	22	52010	0.6364	2.83297e-07	****	4.41587e-06	****	Ex vs Se		223	GO:0007018	BP	microtubule-based movement	Vc13a287.20, Vc13s285.50, Vc1a31.30, Vc21p266.4, Vc22a117.29, Vc22a135.25, Vc26a256.29, Vc30a108.31, Vc30a112.38, Vc30a113.20, Vc31s37.24, Vc32a99.28, Vc33a60.26, Vc37s246.22, Vc38a288.31, Vc39s71.32, Vc43a233.24, Vc43s248.23, Vc494a0.13, Vc5p26.8, Vc83a1.23, Vc8s15.32	22	9109	45	52010	0.4889	1.38493e-06	****	2.42332e-05	****	Se vs Sa		GO:0003849	MF
224	GO:0090378	BP	seed trichome elongation	Novel2048, Vc13p97.14, Vc16a348.28, Vc18a48.38, Vc19s130.30, Vc1a90.20, Vc2a302.39, Vc54a12.26, Vc57a6.30, Vc57a7.37, Vc5a108.22, Vc7a59.35, Vc8p335.15	13	1861	100	52010	0.13	5.94099e-05	****	0.000394386	***	Ex vs Sa		224	GO:0009044	MF	xylan 1,4-beta-xylosidase activity	Vc16a122.23, Vc17a227.19, Vc17s123.33, Vc18p273.2, Vc18s72.38, Vc31a30.33, Vc34a229.41, Vc7a310.16, Vc7a89.32, Vc8a395.25	10	7813	12	52010	0.8333	2.86698e-07	****	4.44894e-06	****	Ex vs Se		224	GO:0016998	BP	cell wall macromolecule catabolic process	Vc12a10.30, Vc12p382.8, Vc13a314.25, Vc14a385.20, Vc23p16.11, Vc23p16.4, Vc23p17.1, Vc23p52.20, Vc23s17.40, Vc30s82.54, Vc32s66.30, Vc35a54.42, Vc36a216.26, Vc41a264.29, Vc41p264.23, Vc42a213.43, Vc53a15.50, Vc53a15.52, Vc53p15.32, Vc9a90.20	20	9109	39	52010	0.5128	1.59568e-06	****	2.77962e-05	****	Se vs Sa		GO:0090378	BP
225	GO:1905039	BP	carboxylic acid transmembrane transport	Vc16a1.31, Vc19a43.41, Vc19a45.34, Vc20s44.62, Vc23p356.19, Vc26s184.18, Vc2a200.31, Vc2a443.35, Vc33s165.33	9	1861	50	52010	0.18	6.27515e-05	****	0.000414718	***	Ex vs Sa		225	GO:0030060	MF	L-malate dehydrogenase activity	Vc10a30.27, Vc17p79.24, Vc21a198.32, Vc22a47.36, Vc26a195.28, Vc27p23.19, Vc33a156.18, Vc34p269.11, Vc35s22.36, Vc36a260.22, Vc45p44.27, Vc4s65.63, Vc5p392.7, Vc775a0.11, Vc9p40.21	15	7813	25	52010	0.6	3.19459e-07	****	4.93528e-06	****	Ex vs Se		225	GO:0016758	MF	hexosyltransferase activity	Vc10s5.38, Vc1296a0.6, Vc12a336.20, Vc1316s0.8, Vc1s441.33, Vc20p343.1, Vc22a8.25, Vc25s231.31, Vc28s31.31, Vc2s177.22, Vc37s23.38, Vc39a273.21, Vc41s215.25, Vc48p74.12, Vc49s36.42, Vc6a41.34, Vc6s101.26, Vc8s3.26	18	9109	33	52010	0.5455	1.64508e-06	****	2.85294e-05	****	Se vs Sa		GO:1905039	BP
226	GO:0016207	MF	4-coumarate-CoA ligase activity	Novel0854, Vc17p323.0, Vc20s2.38, Vc27p288.0, Vc28a349.38, Vc34p57.9, Vc38s101.15, Vc44a237.18, Vc50p21.6, Vc6a422.25	10	1861	62	52010	0.1613	6.61502e-05	****	0.000435245	***	Ex vs Sa		226	GO:0009812	BP	flavonoid metabolic process	Novel3539, Vc25a173.26, Vc28a334.35, Vc2a67.14, Vc35a1.21, Vc3a334.17, Vc48a94.41, Vc4p104.3, Vc9p64.0	9	7813	10	52010	0.9	3.3563e-07	****	5.16216e-06	****	Ex vs Se		226	GO:0019722	BP	calcium-mediated signaling	Vc134a2.26, Vc1s453.38, Vc22a5.23, Vc26a37.40, Vc35a3.24, Vc36a242.31, Vc43s180.20, Vc5a410.20, Vc6a25.34, Vc6s15.51, Vc83a1.28, Vc8a14.36, Vc90a5.67, Vc9a61.43	14	9109	22	52010	0.6364	1.95652e-06	****	3.36315e-05	****	Se vs Sa		GO:0016207	MF
227	GO:1902679	BP	negative regulation of RNA biosynthetic process	Vc11a207.26, Vc15a200.28, Vc19a273.26, Vc24a191.23, Vc30a239.30, Vc43s237.33	6	1861	21	52010	0.2857	7.10807e-05	****	0.000461559	***	Ex vs Sa		227	GO:0042026	BP	protein refolding	Vc106a4.43, Vc11a232.27, Vc13a83.25, Vc16a230.18, Vc16p71.20, Vc18a174.24, Vc24a161.24, Vc27s351.28, Vc30s323.34, Vc31a171.19, Vc32s281.37, Vc35a306.31, Vc35a6.30, Vc36a244.31, Vc36s0.30, Vc43p130.15, Vc47a71.35, Vc4s421.35, Vc7a174.22, Vc9s395.32	20	7813	41	52010	0.4878	3.60412e-07	****	5.51891e-06	****	Ex vs Se		227	GO:0035725	BP	sodium ion transmembrane transport	Vc138a0.21, Vc16a256.16, Vc18a146.17, Vc1a44.30, Vc31a202.21, Vc31a211.16, Vc4a37.37, Vc5a43.25, Vc6s35.30, Vc7s187.31, Vc80a3.29, Vc8a372.32, Vc93a5.51, Vc9a12.33	14	9109	22	52010	0.6364	1.95652e-06	****	3.36315e-05	****	Se vs Sa		GO:1902679	BP
228	GO:0009750	BP	response to fructose	Vc18s145.24, Vc22a294.17, Vc43a88.21, Vc43a95.21, Vc47a111.19, Vc7a143.23	6	1861	21	52010	0.2857	7.10807e-05	****	0.000461559	***	Ex vs Sa		228	GO:0030154	BP	cell differentiation	Vc102a1.33, Vc1069a0.8, Vc11a301.20, Vc13a112.29, Vc14a201.25, Vc16a136.20, Vc16a258.27, Vc17s355.52, Vc19a63.36, Vc20a127.41, Vc20a213.21, Vc20a67.30, Vc21a249.36, Vc23a138.22, Vc23s296.31, Vc28a136.10, Vc28a291.23, Vc29a172.20, Vc29s235.27, Vc2a240.26, Vc30s274.40, Vc31a204.38, Vc31a48.13, Vc32a262.26, Vc32a267.32, Vc33a107.21, Vc33a170.18, Vc33a45.34, Vc34a26.31, Vc37s143.27, Vc38s163.31, Vc39…	42	7813	128	52010	0.3281	3.67968e-07	****	5.60991e-06	****	Ex vs Se		228	GO:1902652	BP	secondary alcohol metabolic process	Vc12a381.27, Vc17a93.20, Vc1a187.26, Vc27a54.30, Vc32a205.18, Vc34a300.23, Vc40a282.69, Vc40a282.70, Vc42a90.16, Vc45a7.28, Vc813s0.10, Vc8s235.23	12	9109	17	52010	0.7059	2.12845e-06	****	3.64264e-05	****	Se vs Sa		GO:0009750	BP
229	GO:0071669	BP	plant-type cell wall organization or biogenesis	Vc22a108.31, Vc27a6.24, Vc34a286.31, Vc37a35.39, Vc52a15.38, Vc6s112.26	6	1861	21	52010	0.2857	7.10807e-05	****	0.000461559	***	Ex vs Sa		229	GO:0030163	BP	protein catabolic process	Vc11a399.36, Vc12a100.16, Vc12a60.43, Vc13a282.24, Vc15a391.61, Vc15s391.62, Vc16a164.21, Vc17s6.46, Vc18a6.28, Vc19a24.33, Vc19a68.53, Vc20a24.34, Vc20a72.60, Vc21s15.41, Vc21s347.28, Vc249a0.58, Vc24a4.27, Vc28a286.23, Vc28a332.27, Vc29s10.40, Vc31a76.17, Vc32a93.23, Vc33a305.26, Vc38s261.33, Vc39s285.26, Vc40a30.26, Vc40s32.49, Vc41p39.24, Vc41p41.22, Vc42p195.3, Vc43a262.25, Vc48a48.25, Vc48a…	38	7813	111	52010	0.3423	3.87797e-07	****	5.88638e-06	****	Ex vs Se		229	GO:0098662	BP	inorganic cation transmembrane transport	Vc11p18.0, Vc1216a0.4, Vc12a108.20, Vc15a296.30, Vc15a30.29, Vc16s68.33, Vc17p92.9, Vc17s327.34, Vc18p328.12, Vc21a376.27, Vc22s56.46, Vc23a304.28, Vc26a364.26, Vc28p0.7, Vc29a347.24, Vc2s375.49, Vc32a255.26, Vc32p319.0, Vc33a4.31, Vc34a301.12, Vc3a291.20, Vc3a33.25, Vc40p37.0, Vc41s132.20, Vc42p15.6, Vc44a229.35, Vc44s81.18, Vc45p7.19, Vc7a356.28	29	9109	70	52010	0.4143	2.36812e-06	****	4.03511e-05	****	Se vs Sa		GO:0071669	BP
230	GO:0016762	MF	xyloglucan:xyloglucosyl transferase activity	Vc1584a0.5, Vc22a67.34, Vc35a208.17, Vc37a35.39, Vc38s242.14, Vc52a15.38, Vc6a253.9, Vc6s112.26	8	1861	40	52010	0.2	7.32029e-05	****	0.000473273	***	Ex vs Sa		230	GO:0034605	BP	cellular response to heat	Novel2231, Novel2908, Vc13a239.16, Vc19a24.33, Vc21a51.38, Vc22a115.30, Vc22a180.17, Vc22a344.19, Vc25a6.28, Vc26a52.34, Vc28a332.27, Vc29a52.36, Vc2a24.22, Vc30a161.24, Vc32s159.37, Vc33a283.25, Vc38s277.25, Vc3a400.25, Vc3a415.25, Vc40a229.22, Vc42s154.43, Vc43a251.34, Vc43s28.26, Vc46p60.11, Vc48a91.35	25	7813	59	52010	0.4237	3.97591e-07	****	5.99127e-06	****	Ex vs Se		230	GO:0045893	BP	positive regulation of DNA-templated transcription	Novel0103, Vc11a169.30, Vc13s70.42, Vc14a54.29, Vc14s321.47, Vc15a146.25, Vc15s22.36, Vc169a0.20, Vc17a101.14, Vc17a256.25, Vc18a2.21, Vc19a237.25, Vc19a63.36, Vc19p364.10, Vc19s313.36, Vc20a67.30, Vc21a177.35, Vc21p261.1, Vc22a36.36, Vc22s294.21, Vc23p152.0, Vc23s187.33, Vc24a117.29, Vc24a227.11, Vc25a52.29, Vc25p288.6, Vc25p330.6, Vc26p252.4, Vc28a291.23, Vc29a172.20, Vc2a371.35, Vc31p337.9, Vc…	60	9109	192	52010	0.3125	2.43826e-06	****	4.13656e-05	****	Se vs Sa		GO:0016762	MF
231	GO:0015171	MF	amino acid transmembrane transporter activity	Vc19a43.41, Vc1a403.29, Vc1a459.29, Vc23p356.19, Vc26s184.18, Vc2a200.31, Vc2a443.35, Vc33s165.33, Vc41a276.28	9	1861	51	52010	0.1765	7.37912e-05	****	0.000475011	***	Ex vs Sa		231	GO:0098542	BP	defense response to other organism	Vc10a163.29, Vc10a195.14, Vc1233s0.10, Vc13a44.45, Vc14s208.35, Vc17a121.22, Vc17a151.17, Vc17s83.33, Vc20a322.39, Vc21a120.30, Vc21p27.11, Vc21s241.28, Vc21s354.32, Vc23p119.24, Vc23p127.6, Vc25p35.6, Vc25s257.49, Vc26a124.25, Vc28s142.27, Vc29a10.23, Vc29p22.9, Vc2a351.29, Vc2s246.34, Vc30a300.26, Vc32a320.30, Vc33a70.19, Vc33p292.4, Vc33s89.26, Vc33s94.34, Vc33s99.32, Vc35a235.33, Vc35p273.6, …	46	7813	146	52010	0.3151	3.99339e-07	****	5.99127e-06	****	Ex vs Se		231	GO:1901002	BP	positive regulation of response to salt stress	Novel0201, Novel1225, Novel2067, Vc12s44.37, Vc138a0.21, Vc14s321.47, Vc16a256.16, Vc18a146.17, Vc22s268.28, Vc2a334.31, Vc2a371.35, Vc31a202.21, Vc35a223.35, Vc38a24.32, Vc396a0.18, Vc3a69.28, Vc3s37.43, Vc4a37.37, Vc5p153.3, Vc9a12.33	20	9109	40	52010	0.5	2.66518e-06	****	4.50196e-05	****	Se vs Sa		GO:0015171	MF
232	GO:0009651	BP	response to salt stress	Novel1844, Vc10a342.30, Vc10s394.22, Vc15a373.26, Vc15s373.36, Vc16s191.21, Vc17a163.18, Vc17a163.19, Vc19p46.20, Vc19s349.40, Vc1a69.26, Vc1a7.44, Vc21a309.26, Vc25s343.41, Vc2a101.19, Vc2a333.29, Vc31a123.20, Vc34a187.19, Vc35p216.5, Vc36s268.40, Vc3a70.37, Vc45a129.27, Vc54a12.26, Vc57a6.30, Vc57a7.37, Vc5a56.26, Vc5s7.37, Vc8a353.26	28	1861	353	52010	0.0793	8.58284e-05	****	0.000550116	***	Ex vs Sa		232	GO:0006351	BP	DNA-templated transcription	Novel1370, Vc11s282.27, Vc12s139.41, Vc12s353.27, Vc13a111.16, Vc1414p0.1, Vc15a266.29, Vc15p249.5, Vc16p194.7, Vc17s44.41, Vc18a83.29, Vc18p209.20, Vc19s313.32, Vc20a104.15, Vc20a374.28, Vc21a363.31, Vc22a238.25, Vc22s129.19, Vc22s192.24, Vc248a0.46, Vc24a75.39, Vc24p260.3, Vc24s118.41, Vc26p350.1, Vc26s196.29, Vc28p83.19, Vc28s353.78, Vc28s70.33, Vc29a338.24, Vc2s353.28, Vc32a263.25, Vc32a266.1…	62	7813	220	52010	0.2818	3.99878e-07	****	5.99127e-06	****	Ex vs Se		232	GO:0015786	BP	UDP-glucose transmembrane transport	Vc14s141.21, Vc21a317.34, Vc25a219.17, Vc26a309.28, Vc29a297.28, Vc2s192.39, Vc30a150.47, Vc37a110.25, Vc37s125.15, Vc3a249.22, Vc6a160.28	11	9109	15	52010	0.7333	3.21499e-06	****	5.40728e-05	****	Se vs Sa		GO:0009651	BP
233	GO:0009958	BP	positive gravitropism	Vc11a269.29, Vc15a255.20, Vc19a301.22, Vc19a303.28, Vc24a130.35	5	1861	14	52010	0.3571	8.91082e-05	****	0.000561457	***	Ex vs Sa		233	GO:0009835	BP	fruit ripening	Vc11s212.32, Vc14s19.34, Vc1584a0.5, Vc15s205.28, Vc191s1.61, Vc20a157.23, Vc22a67.34, Vc25s25.33, Vc28a165.20, Vc31s261.40, Vc35a206.17, Vc35s152.30, Vc36s205.36, Vc37s189.25, Vc3a410.20, Vc4a250.24, Vc4a301.26, Vc6a206.21, Vc9a276.20	19	7813	38	52010	0.5	4.32271e-07	****	6.44882e-06	****	Ex vs Se		233	GO:0005746	CC	mitochondrial respirasome	Vc10s373.35, Vc11p393.5, Vc12a89.29, Vc16a307.22, Vc1746p0.3, Vc22a368.37, Vc24p4.6, Vc43p4.4, Vc4a25.25, Vc4s22.36, Vc51p5.8, Vc5p25.12, Vc9s8.35	13	9109	20	52010	0.65	3.26022e-06	****	5.41336e-05	****	Se vs Sa		GO:0009958	BP
234	GO:1902223	BP	erythrose 4-phosphate/phosphoenolpyruvate family amino acid biosynthetic process	Vc11a288.26, Vc15a272.36, Vc19a320.28, Vc24a111.29, Vc47p59.3	5	1861	14	52010	0.3571	8.91082e-05	****	0.000561457	***	Ex vs Sa		234	GO:0051603	BP	proteolysis involved in protein catabolic process	Vc1141a0.6, Vc11a306.29, Vc148s2.72, Vc14s205.36, Vc153a2.51, Vc18a374.25, Vc22s37.46, Vc23a121.37, Vc23a126.32, Vc24a96.24, Vc25a12.29, Vc25s254.33, Vc2p242.18, Vc306s0.50, Vc35a73.33, Vc3a193.18, Vc40a266.26, Vc41a249.32, Vc74a2.36, Vc75a2.36, Vc81a5.33	21	7813	45	52010	0.4667	4.7448e-07	****	7.04826e-06	****	Ex vs Se		234	GO:0070887	BP	cellular response to chemical stimulus	Vc10s385.49, Vc13s266.40, Vc19a36.26, Vc20s36.34, Vc214s1.45, Vc21p238.1, Vc21s6.48, Vc26p234.1, Vc29p226.18, Vc30s135.49, Vc32s110.27, Vc38a209.32, Vc42s179.34	13	9109	20	52010	0.65	3.26022e-06	****	5.41336e-05	****	Se vs Sa		GO:1902223	BP
235	GO:0008515	MF	sucrose transmembrane transporter activity	Vc37a105.23, Vc38s175.32, Vc613p0.1, Vc6a194.23, Vc6p193.11	5	1861	14	52010	0.3571	8.91082e-05	****	0.000561457	***	Ex vs Sa		235	GO:0007010	BP	cytoskeleton organization	Vc10a161.18, Vc11a8.21, Vc13a108.11, Vc13a78.32, Vc15p329.28, Vc16a348.28, Vc16a381.41, Vc17a17.16, Vc17s221.33, Vc18a15.26, Vc18a48.38, Vc21s326.34, Vc29s305.37, Vc30a327.34, Vc31a295.31, Vc31a325.19, Vc32a266.23, Vc32s287.27, Vc34a256.31, Vc35a236.28, Vc44a240.22, Vc45a28.21, Vc45a31.32, Vc4a328.35, Vc5s288.39, Vc7a48.44, Vc7a59.35, Vc8p142.3	28	7813	71	52010	0.3944	4.92741e-07	****	7.28837e-06	****	Ex vs Se		235	GO:0006090	BP	pyruvate metabolic process	Vc187a1.54, Vc1s25.46, Vc22s26.56, Vc26a0.15, Vc33a316.14, Vc33a324.17, Vc35a283.38, Vc35a307.23, Vc36a42.30, Vc4s40.39, Vc4s420.28, Vc9a396.27, Vc9s17.47	13	9109	20	52010	0.65	3.26022e-06	****	5.41336e-05	****	Se vs Sa		GO:0008515	MF
236	GO:0015770	BP	sucrose transport	Vc37a105.23, Vc38s175.32, Vc613p0.1, Vc6a194.23, Vc6p193.11	5	1861	14	52010	0.3571	8.91082e-05	****	0.000561457	***	Ex vs Sa		236	GO:0042742	BP	defense response to bacterium	Novel0761, Novel2630, Vc11a294.25, Vc11s327.45, Vc11s372.31, Vc11s73.25, Vc12a108.20, Vc14a323.40, Vc17a165.31, Vc17a337.44, Vc17a56.35, Vc17p165.20, Vc17p92.9, Vc17s56.40, Vc17s56.41, Vc19s346.45, Vc1a323.25, Vc20s371.37, Vc22p234.9, Vc22s52.23, Vc23a304.28, Vc24p196.2, Vc25p47.2, Vc26a174.38, Vc26s76.20, Vc27a300.32, Vc27p357.7, Vc27s126.51, Vc27s128.42, Vc29a312.19, Vc29s145.17, Vc29s167.33, V…	60	7813	212	52010	0.283	5.20411e-07	****	7.66504e-06	****	Ex vs Se		236	GO:0005777	CC	peroxisome	Vc10a149.15, Vc115a1.24, Vc11a216.25, Vc11a229.36, Vc11p260.30, Vc11p62.4, Vc12a15.23, Vc12a31.26, Vc12a374.21, Vc12s329.48, Vc12s40.56, Vc12s7.48, Vc13a32.22, Vc13s302.30, Vc13s53.55, Vc14a372.28, Vc15a158.19, Vc197a1.52, Vc19s164.36, Vc1a20.21, Vc1s229.29, Vc1s405.36, Vc20s7.30, Vc21s347.28, Vc23a357.24, Vc23a76.14, Vc23p364.3, Vc23s55.27, Vc247a0.50, Vc24a215.15, Vc24s137.42, Vc25p172.0, Vc25p…	78	9109	272	52010	0.2868	3.6327e-06	****	6.00627e-05	****	Se vs Sa		GO:0015770	BP
237	GO:0008171	MF	O-methyltransferase activity	Vc1a337.35, Vc20a5.31, Vc30p58.9, Vc34s139.31, Vc374s0.33, Vc45s216.26, Vc48a105.37	7	1861	31	52010	0.2258	9.1713e-05	****	0.000575431	***	Ex vs Sa		237	GO:0009269	BP	response to desiccation	Vc103a3.31, Vc12p296.10, Vc12p296.8, Vc15p173.2, Vc15s167.24, Vc1s138.31, Vc24a207.28, Vc310p0.1, Vc40p190.5, Vc41a177.32, Vc41p177.6, Vc5a126.29, Vc8a283.29	13	7813	20	52010	0.65	5.3512e-07	****	7.84843e-06	****	Ex vs Se		237	GO:0140825	MF	lactoperoxidase activity	Vc10s232.19, Vc11p309.17, Vc13s302.30, Vc14s322.43, Vc14s362.36, Vc15a294.29, Vc16a42.29, Vc18a356.36, Vc1s176.37, Vc1s45.29, Vc24p92.1, Vc25a316.26, Vc2a320.20, Vc2s372.43, Vc32a257.23, Vc32s76.26, Vc35a117.34, Vc37a166.16, Vc39s195.45, Vc3p36.24, Vc3s84.52, Vc43a78.24, Vc4a226.32, Vc5a306.23, Vc60a3.27, Vc6s228.38, Vc7a201.15, Vc7a382.28, Vc8a248.21, Vc9a171.28	30	9109	75	52010	0.4	3.79855e-06	****	6.25398e-05	****	Se vs Sa		GO:0008171	MF
238	GO:0015297	MF	antiporter activity	Vc14s366.38, Vc21p311.0, Vc23a333.30, Vc25a317.25, Vc26p304.17, Vc26s304.43, Vc26s305.50, Vc27a362.29, Vc29p292.3, Vc2a421.33, Vc34a98.23, Vc35s111.31, Vc35s82.35, Vc36s159.21, Vc3a104.21, Vc40a9.29, Vc4a170.22, Vc4a293.24, Vc9s166.18	19	1861	197	52010	0.0964	9.45483e-05	****	0.000590728	***	Ex vs Sa		238	GO:0003854	MF	3-beta-hydroxy-delta5-steroid dehydrogenase activity	Vc13a67.37, Vc14a350.33, Vc14a46.20, Vc25a44.25, Vc26a16.35, Vc29a16.15, Vc2a404.33, Vc2a63.19, Vc30a338.22, Vc32a297.40, Vc33p299.18, Vc35p293.6, Vc37a289.46, Vc39a12.37, Vc3a382.28, Vc454s0.28, Vc9p377.29	17	7813	32	52010	0.5312	5.7521e-07	****	8.40096e-06	****	Ex vs Se		238	GO:0006486	BP	protein glycosylation	Novel2304, Vc100a0.27, Vc10s5.38, Vc1296a0.6, Vc12p314.6, Vc1316s0.8, Vc13a255.17, Vc14a40.31, Vc1s441.33, Vc20p343.1, Vc21a203.25, Vc21a294.30, Vc21s242.39, Vc22a252.26, Vc23a316.42, Vc23p78.4, Vc25s231.31, Vc26a200.15, Vc26s238.33, Vc26s280.42, Vc28s31.31, Vc29a193.17, Vc29a77.25, Vc29s229.29, Vc2a279.15, Vc2s177.22, Vc30a147.18, Vc31p65.5, Vc32s145.29, Vc32s6.29, Vc33a151.23, Vc33a86.29, Vc33a…	63	9109	208	52010	0.3029	4.41116e-06	****	7.23207e-05	****	Se vs Sa		GO:0015297	MF
239	GO:0006869	BP	lipid transport	Novel0179, Novel2048, Vc1s251.29, Vc27a6.25, Vc28a82.25, Vc2s374.41, Vc35a266.25, Vc35p240.0, Vc44a234.29, Vc5a319.26, Vc5a65.38, Vc8a196.32, Vc8a196.33	13	1861	105	52010	0.1238	9.89231e-05	****	0.000613402	***	Ex vs Sa		239	GO:0016597	MF	amino acid binding	Vc11p299.22, Vc13a112.28, Vc15s318.49, Vc16p219.17, Vc1a186.19, Vc21s234.20, Vc26a230.17, Vc28a286.29, Vc29a221.37, Vc32a262.24, Vc32a267.33, Vc33a121.16, Vc35a160.22, Vc36p196.2, Vc48s12.17, Vc4a259.21, Vc5a232.27, Vc5s236.31, Vc7p412.1, Vc9s374.35	20	7813	42	52010	0.4762	5.90699e-07	****	8.55529e-06	****	Ex vs Se		239	GO:0045277	CC	respiratory chain complex IV	Vc12a240.21, Vc18a70.32, Vc23a257.36, Vc28s54.29, Vc31a276.30, Vc40a74.27, Vc41a63.18, Vc44s52.49, Vc74s0.19, Vc7a78.39	10	9109	13	52010	0.7692	4.60358e-06	****	7.51597e-05	****	Se vs Sa		GO:0006869	BP
240	GO:0016134	BP	saponin metabolic process	Vc10a192.35, Vc1a241.25, Vc5a190.17, Vc8a205.30	4	1861	8	52010	0.5	0.00010189	***	0.000613402	***	Ex vs Sa		240	GO:0098656	BP	monoatomic anion transmembrane transport	Vc12a336.20, Vc173a0.26, Vc28a193.16, Vc2s272.40, Vc30a329.22, Vc30a337.34, Vc32a288.37, Vc32a297.34, Vc32s260.25, Vc32s269.43, Vc32s297.45, Vc35a35.27, Vc36s273.38, Vc3a165.18, Vc40a231.20, Vc41s215.25, Vc4s53.29, Vc7a288.35, Vc94a4.22, Vc9s29.24	20	7813	42	52010	0.4762	5.90699e-07	****	8.55529e-06	****	Ex vs Se		240	GO:0033554	BP	cellular response to stress	Vc10p265.7, Vc13a83.25, Vc16a230.18, Vc16p71.20, Vc18a174.24, Vc19a36.26, Vc20s36.34, Vc214s1.45, Vc21p238.1, Vc22p180.0, Vc26p234.1, Vc27a97.27, Vc29p226.18, Vc30s323.34, Vc31a171.19, Vc32s281.37, Vc34a216.18, Vc43a15.28, Vc45p51.16, Vc46a194.27, Vc46a60.18, Vc7a174.22, Vc8a287.20	23	9109	51	52010	0.451	4.62788e-06	****	7.52416e-05	****	Se vs Sa		GO:0016134	BP
241	GO:0061783	MF	peptidoglycan muralytic activity	Vc12a298.31, Vc23a93.31, Vc40a193.25, Vc41a181.26	4	1861	8	52010	0.5	0.00010189	***	0.000613402	***	Ex vs Sa		241	GO:0009505	CC	plant-type cell wall	Vc1127a0.6, Vc117a2.46, Vc11a116.15, Vc11p90.11, Vc126s3.69, Vc13a282.27, Vc14a323.40, Vc16a218.19, Vc18a187.21, Vc20s2.37, Vc21a112.20, Vc21a112.21, Vc23p250.2, Vc25a316.26, Vc29a112.21, Vc2a320.20, Vc30a117.25, Vc31s155.33, Vc32a93.26, Vc33a226.20, Vc34a19.23, Vc35a117.34, Vc35a206.17, Vc3a84.40, Vc3p36.24, Vc3s61.30, Vc3s84.52, Vc42a195.21, Vc42p5.10, Vc4a301.26, Vc56a3.40, Vc7a199.23, Vc7a414…	35	7813	100	52010	0.35	6.03061e-07	****	8.69808e-06	****	Ex vs Se		241	GO:0051017	BP	actin filament bundle assembly	Vc11a350.31, Vc17s267.34, Vc19a44.44, Vc24a51.33, Vc30a94.26, Vc33a204.33, Vc36a72.30, Vc36a73.37, Vc38a0.13, Vc39a42.21, Vc6a35.25, Vc6s405.40, Vc80s3.39, Vc93s4.42, Vc9a344.27	15	9109	26	52010	0.5769	4.817e-06	****	7.76691e-05	****	Se vs Sa		GO:0061783	MF
242	GO:0047655	MF	allyl-alcohol dehydrogenase activity	Vc12s139.44, Vc40a63.31, Vc40a63.32, Vc41s3.38	4	1861	8	52010	0.5	0.00010189	***	0.000613402	***	Ex vs Sa		242	GO:0008283	BP	cell population proliferation	Vc13a112.29, Vc16a136.20, Vc17a101.14, Vc21a249.36, Vc23s296.31, Vc29s235.27, Vc31a48.13, Vc32a262.26, Vc32a267.32, Vc33a107.21, Vc33a45.34, Vc34a295.15, Vc45a12.16, Vc7a300.25	14	7813	23	52010	0.6087	6.23241e-07	****	8.94594e-06	****	Ex vs Se		242	GO:0008308	MF	voltage-gated monoatomic anion channel activity	Vc13a68.42, Vc16a143.24, Vc173a0.26, Vc2s272.40, Vc30a329.22, Vc30a337.34, Vc31a57.23, Vc32a288.37, Vc32a297.34, Vc32s260.25, Vc32s269.43, Vc32s297.45, Vc3a165.18, Vc7a288.35, Vc94a4.22	15	9109	26	52010	0.5769	4.817e-06	****	7.76691e-05	****	Se vs Sa		GO:0047655	MF
243	GO:0006714	BP	sesquiterpenoid metabolic process	Vc14s19.34, Vc25s25.33, Vc37s189.25, Vc3a410.20	4	1861	8	52010	0.5	0.00010189	***	0.000613402	***	Ex vs Sa		243	GO:0046395	BP	carboxylic acid catabolic process	Vc10a26.18, Vc14s19.34, Vc1a416.35, Vc22a197.17, Vc25s25.33, Vc26p329.6, Vc34a293.16, Vc37s189.25, Vc3a410.20, Vc43a171.21, Vc46p82.24, Vc47a7.20, Vc5a395.33, Vc5s318.22, Vc8a116.19, Vc8a35.40	16	7813	29	52010	0.5517	6.27966e-07	****	8.94594e-06	****	Ex vs Se		243	GO:0000160	BP	phosphorelay signal transduction system	Vc102a1.29, Vc10a34.29, Vc11s269.36, Vc14a54.29, Vc153a1.40, Vc15a382.31, Vc194s1.84, Vc19a36.26, Vc1p389.11, Vc20s36.34, Vc214s1.45, Vc21s170.39, Vc24a130.37, Vc25a52.29, Vc26s169.45, Vc27a303.29, Vc28s149.34, Vc2a241.26, Vc34a42.49, Vc35a216.21, Vc35a6.30, Vc36a244.31, Vc36a86.32, Vc37s274.42, Vc38a25.23, Vc39a23.22, Vc39s179.34, Vc3a197.25, Vc3a370.17, Vc43p119.34, Vc44s157.36, Vc4a93.26, Vc4p…	38	9109	106	52010	0.3585	4.93672e-06	****	7.87423e-05	****	Se vs Sa		GO:0006714	BP
244	GO:0016115	BP	terpenoid catabolic process	Vc14s19.34, Vc25s25.33, Vc37s189.25, Vc3a410.20	4	1861	8	52010	0.5	0.00010189	***	0.000613402	***	Ex vs Sa		244	GO:0010305	BP	leaf vascular tissue pattern formation	Vc14a47.26, Vc14s250.38, Vc1a359.30, Vc20s218.41, Vc24a28.29, Vc25a289.27, Vc2a294.28, Vc35p165.11, Vc36s192.17, Vc3a381.15, Vc3s119.25, Vc4a319.24, Vc4p263.13, Vc5a338.32, Vc8a98.20, Vc9s226.24	16	7813	29	52010	0.5517	6.27966e-07	****	8.94594e-06	****	Ex vs Se		244	GO:0004427	MF	inorganic diphosphate phosphatase activity	Vc10s243.33, Vc17a169.23, Vc17a380.29, Vc17s45.37, Vc1s168.29, Vc27a132.27, Vc27a300.31, Vc27s340.32, Vc34a182.36, Vc34a317.28, Vc45a134.28, Vc49s3.45, Vc5a158.19, Vc60a8.35, Vc74a6.27, Vc75a6.31, Vc81a2.28, Vc8s257.20	18	9109	35	52010	0.5143	5.02918e-06	****	7.87423e-05	****	Se vs Sa		GO:0016115	BP
245	GO:0043288	BP	apocarotenoid metabolic process	Vc14s19.34, Vc25s25.33, Vc37s189.25, Vc3a410.20	4	1861	8	52010	0.5	0.00010189	***	0.000613402	***	Ex vs Sa		245	GO:0006720	BP	isoprenoid metabolic process	Vc11a229.36, Vc12a13.29, Vc12s329.48, Vc13a286.23, Vc13p166.8, Vc149s2.68, Vc14a174.42, Vc14a350.33, Vc16a0.19, Vc18s382.86, Vc1s301.33, Vc200a0.29, Vc20a52.37, Vc20a56.37, Vc22a47.36, Vc22s26.56, Vc22s92.38, Vc23a362.41, Vc2a404.33, Vc32p199.0, Vc36a177.9, Vc36p33.3, Vc37a253.25, Vc3a222.38, Vc42p96.9, Vc43a71.27, Vc43a9.42, Vc454s0.28, Vc46a152.32, Vc4s420.28, Vc4s65.63, Vc6a364.11, Vc6a412.16,…	38	7813	113	52010	0.3363	6.47554e-07	****	9.17939e-06	****	Ex vs Se		245	GO:0001666	BP	response to hypoxia	Vc13s257.23, Vc140a1.34, Vc17s73.32, Vc19a36.26, Vc1a236.25, Vc20s36.34, Vc214s1.45, Vc27a17.24, Vc28a68.22, Vc30a146.39, Vc32a121.31, Vc36a83.18, Vc38a123.26, Vc39s131.28, Vc44s57.34, Vc45p51.16, Vc4a358.29, Vc9a334.16	18	9109	35	52010	0.5143	5.02918e-06	****	7.87423e-05	****	Se vs Sa		GO:0043288	BP
246	GO:0120254	BP	olefinic compound metabolic process	Vc14s19.34, Vc25s25.33, Vc37s189.25, Vc3a410.20	4	1861	8	52010	0.5	0.00010189	***	0.000613402	***	Ex vs Sa		246	GO:0010333	MF	terpene synthase activity	Vc156a1.31, Vc15a369.30, Vc19a379.34, Vc24a26.32, Vc35a89.23, Vc35s90.60, Vc39p78.6, Vc39s79.31, Vc4a177.21, Vc4a177.22, Vc4a178.28, Vc4s177.24, Vc4s180.34, Vc6s2.45, Vc9s134.43	15	7813	26	52010	0.5769	6.49634e-07	****	9.17939e-06	****	Ex vs Se		246	GO:0017040	MF	N-acylsphingosine amidohydrolase activity	Vc11s340.47, Vc15s330.54, Vc17a17.17, Vc24p75.13, Vc34a256.30, Vc45a31.29, Vc45p28.4	7	9109	7	52010	1	5.045e-06	****	7.87423e-05	****	Se vs Sa		GO:0120254	BP
247	GO:1902644	BP	tertiary alcohol metabolic process	Vc14s19.34, Vc25s25.33, Vc37s189.25, Vc3a410.20	4	1861	8	52010	0.5	0.00010189	***	0.000613402	***	Ex vs Sa		247	GO:0009986	CC	cell surface	Vc11a269.29, Vc11s311.33, Vc15a255.20, Vc15s296.32, Vc19a301.22, Vc19a303.28, Vc24a130.35, Vc24a91.31, Vc54a12.26, Vc57a6.30, Vc57a7.37	11	7813	15	52010	0.7333	6.60688e-07	****	9.2231e-06	****	Ex vs Se		247	GO:0046514	BP	ceramide catabolic process	Vc11s340.47, Vc15s330.54, Vc17a17.17, Vc24p75.13, Vc34a256.30, Vc45a31.29, Vc45p28.4	7	9109	7	52010	1	5.045e-06	****	7.87423e-05	****	Se vs Sa		GO:1902644	BP
248	GO:0004805	MF	trehalose-phosphatase activity	Vc10a342.30, Vc1a69.26, Vc37a226.21, Vc38s84.29, Vc39s90.9, Vc5a56.26, Vc6p333.13, Vc8a353.26	8	1861	42	52010	0.1905	0.00010544	***	0.000629678	***	Ex vs Sa		248	GO:0034765	BP	regulation of monoatomic ion transmembrane transport	Vc12a356.29, Vc12p72.13, Vc13a156.17, Vc13s24.21, Vc30a215.43, Vc30s280.35, Vc32a207.22, Vc40s3.44, Vc41s238.50, Vc42a88.17, Vc42s37.34	11	7813	15	52010	0.7333	6.60688e-07	****	9.2231e-06	****	Ex vs Se		248	GO:0102121	MF	ceramidase activity	Vc11s340.47, Vc15s330.54, Vc17a17.17, Vc24p75.13, Vc34a256.30, Vc45a31.29, Vc45p28.4	7	9109	7	52010	1	5.045e-06	****	7.87423e-05	****	Se vs Sa		GO:0004805	MF
249	GO:0008152	BP	metabolic process	Vc17s360.29, Vc22p82.4, Vc26s123.43, Vc34a21.31, Vc4p419.17, Vc645p0.4, Vc6a2.39, Vc9a397.25	8	1861	42	52010	0.1905	0.00010544	***	0.000629678	***	Ex vs Sa		249	GO:0045552	MF	dihydrokaempferol 4-reductase activity	Vc13a67.37, Vc13p166.8, Vc14a46.20, Vc25a44.25, Vc2a63.19, Vc30a208.37, Vc30a338.22, Vc32a297.40, Vc32p199.0, Vc3a382.28, Vc42p96.9	11	7813	15	52010	0.7333	6.60688e-07	****	9.2231e-06	****	Ex vs Se		249	GO:0019441	BP	tryptophan catabolic process to kynurenine	Vc14s355.43, Vc21p129.8, Vc266a0.57, Vc26p132.13, Vc29p130.1, Vc2s408.38, Vc33p207.4	7	9109	7	52010	1	5.045e-06	****	7.87423e-05	****	Se vs Sa		GO:0008152	BP
250	GO:0034219	BP	carbohydrate transmembrane transport	Vc13a268.27, Vc13s269.25, Vc30a132.30, Vc31s210.37, Vc32a81.39, Vc42a181.27, Vc42a182.30, Vc42s182.32, Vc43a18.28	9	1861	54	52010	0.1667	0.000117154	***	0.000696831	***	Ex vs Sa		250	GO:0000987	MF	cis-regulatory region sequence-specific DNA binding	Novel4493, Vc102a1.33, Vc13a102.20, Vc13a88.12, Vc1486s0.3, Vc14a201.25, Vc15s21.24, Vc28a197.19, Vc2a240.26, Vc30s274.40, Vc32a276.19, Vc35p253.33, Vc36a113.22, Vc3a198.30, Vc44s239.19, Vc4a330.20, Vc691a0.7, Vc9a224.37, Vc9a307.24	19	7813	39	52010	0.4872	7.23927e-07	****	1.00655e-05	****	Ex vs Se		250	GO:1903825	BP	organic acid transmembrane transport	Vc17s16.50, Vc22a290.27, Vc34p257.19, Vc43a98.29, Vc45p29.15, Vc45p31.19, Vc46a143.20	7	9109	7	52010	1	5.045e-06	****	7.87423e-05	****	Se vs Sa		GO:0034219	BP
251	GO:0010411	BP	xyloglucan metabolic process	Vc1584a0.5, Vc22a67.34, Vc35a208.17, Vc37a35.39, Vc38s242.14, Vc52a15.38, Vc5a305.32, Vc6s112.26	8	1861	43	52010	0.186	0.000125498	***	0.000743487	***	Ex vs Sa		251	GO:0048868	BP	pollen tube development	Vc10a229.25, Vc11a242.24, Vc13p97.14, Vc14a256.29, Vc14a283.32, Vc15s236.53, Vc16a350.21, Vc18a46.32, Vc19s130.30, Vc1p179.5, Vc25a326.33, Vc2a302.39, Vc2a329.32, Vc2a445.28, Vc31a298.23, Vc3a111.29, Vc3p75.0, Vc43a63.49, Vc46a160.25, Vc47a137.36, Vc7a57.24, Vc8p245.8	22	7813	50	52010	0.44	8.97757e-07	****	1.24327e-05	****	Ex vs Se		251	GO:0071949	MF	FAD binding	Novel4753, Vc11p246.8, Vc11s275.47, Vc124a0.29, Vc124s1.42, Vc12a46.45, Vc12s46.60, Vc13a95.36, Vc13a95.37, Vc15p243.0, Vc15s259.42, Vc16a103.23, Vc16a174.22, Vc18a294.21, Vc197a1.52, Vc19s307.44, Vc22a93.18, Vc247a0.50, Vc24a125.25, Vc25a255.24, Vc2a214.23, Vc2a214.29, Vc2a244.18, Vc2a255.31, Vc310a0.38, Vc31a188.20, Vc32a72.36, Vc3a229.19, Vc3a343.17, Vc3a433.39, Vc3p191.23, Vc3s228.43, Vc42a20…	39	9109	110	52010	0.3545	5.07529e-06	****	7.88995e-05	****	Se vs Sa		GO:0010411	BP
252	GO:0004664	MF	prephenate dehydratase activity	Vc11a288.26, Vc15a272.36, Vc19a320.28, Vc24a111.29, Vc47p59.3	5	1861	15	52010	0.3333	0.000129719	***	0.00076282	***	Ex vs Sa		252	GO:0043231	CC	intracellular membrane-bounded organelle	Novel1225, Novel2977, Vc10a249.13, Vc10a280.34, Vc10s317.27, Vc11a356.35, Vc11a388.33, Vc11s19.22, Vc11s231.50, Vc12a40.49, Vc12p109.7, Vc12s7.46, Vc136a1.27, Vc136a3.24, Vc13a239.16, Vc13a83.25, Vc13p40.9, Vc13p66.11, Vc14a373.29, Vc14p175.1, Vc15a348.38, Vc15p231.0, Vc15s154.43, Vc15s226.38, Vc16a230.18, Vc16a67.37, Vc16p71.20, Vc16s59.49, Vc18a174.24, Vc18a374.25, Vc18a6.33, Vc18s223.24, Vc18s…	156	7813	719	52010	0.217	1.00019e-06	****	1.37962e-05	****	Ex vs Se		252	GO:0006857	BP	oligopeptide transport	Vc15a315.31, Vc15a332.33, Vc19a127.27, Vc19s360.29, Vc1a146.25, Vc20s167.19, Vc24s73.43, Vc28a158.33, Vc28a222.20, Vc35a221.31, Vc36a129.18, Vc44s159.26, Vc4a314.31, Vc5a133.24, Vc8a182.20, Vc8a282.35, Vc8s282.45	17	9109	32	52010	0.5312	5.18444e-06	****	8.02766e-05	****	Se vs Sa		GO:0004664	MF
253	GO:0016298	MF	lipase activity	Vc12s48.26, Vc16a182.29, Vc19a63.31, Vc20a66.37, Vc25a249.23, Vc28a292.36, Vc31a93.28, Vc47a175.25, Vc47s188.41, Vc48a57.29	10	1861	67	52010	0.1493	0.000129787	***	0.00076282	***	Ex vs Sa		253	GO:0009058	BP	biosynthetic process	Novel3539, Novel3666, Novel4540, Vc13a11.31, Vc13a36.41, Vc14p365.2, Vc16a226.21, Vc17s145.20, Vc18s178.23, Vc22a228.22, Vc24a300.37, Vc25a173.26, Vc26a322.35, Vc27s109.30, Vc28a45.26, Vc2a67.14, Vc2p188.3, Vc30a267.28, Vc31s166.18, Vc34s205.30, Vc35a1.21, Vc36a21.25, Vc36a217.31, Vc3a334.17, Vc3p3.14, Vc42a25.30, Vc42a50.29, Vc42p25.21, Vc43a148.11, Vc45a107.22, Vc46a117.20, Vc47a38.20, Vc4a134.…	38	7813	115	52010	0.3304	1.06244e-06	****	1.4597e-05	****	Ex vs Se		253	GO:1901576	BP	organic substance biosynthetic process	Vc10a110.29, Vc10a23.16, Vc10a323.26, Vc10p81.9, Vc1169p0.0, Vc117s3.75, Vc12a84.45, Vc13p136.9, Vc15s360.57, Vc17p14.18, Vc17p295.3, Vc1p421.3, Vc1s320.35, Vc20a0.22, Vc21s17.32, Vc22a103.22, Vc22s90.42, Vc23a26.27, Vc23s239.28, Vc23s259.30, Vc241a0.41, Vc27p262.10, Vc27s13.36, Vc28a132.25, Vc30a227.22, Vc30p229.6, Vc34p84.6, Vc38a291.14, Vc39a272.20, Vc39a34.42, Vc39a34.43, Vc3a29.38, Vc41a224.…	44	9109	130	52010	0.3385	5.32657e-06	****	8.20227e-05	****	Se vs Sa		GO:0016298	MF
254	GO:0007165	BP	signal transduction	Novel3199, Novel5402, Vc10p322.0, Vc13a112.29, Vc13a45.43, Vc16a136.20, Vc16s74.45, Vc1743a0.5, Vc17p141.9, Vc17s148.29, Vc19a366.33, Vc1p90.7, Vc21a249.36, Vc23s296.31, Vc26a287.15, Vc29s235.27, Vc2a269.40, Vc31a48.13, Vc33a107.21, Vc33a45.34, Vc5p107.3, Vc6a419.26, Vc6p99.13, Vc7a300.25, Vc7s351.40, Vc8a74.30, Vc8p335.2, Vc8s412.41	28	1861	364	52010	0.0769	0.000144118	***	0.000843715	***	Ex vs Sa		254	GO:0042732	BP	D-xylose metabolic process	Vc11a388.33, Vc15p380.20, Vc19p53.17, Vc20a52.37, Vc20a56.37, Vc23a288.26, Vc24p9.29, Vc28p301.31, Vc37s300.42, Vc39a2.30, Vc40a54.30, Vc43a9.42, Vc46a130.34, Vc47a92.25, Vc51s11.44, Vc6a419.31	16	7813	30	52010	0.5333	1.15723e-06	****	1.58368e-05	****	Ex vs Se		254	GO:0009725	BP	response to hormone	Novel1226, Novel5028, Vc19a37.38, Vc20a37.42, Vc214s0.37, Vc28s319.35, Vc32a261.26, Vc32a268.24, Vc60s7.24, Vc74a7.30, Vc75a7.29, Vc81a1.30	12	9109	18	52010	0.6667	5.36027e-06	****	8.20227e-05	****	Se vs Sa		GO:0007165	BP
255	GO:0009718	BP	anthocyanin-containing compound biosynthetic process	Vc13p166.8, Vc22a131.24, Vc30a208.37, Vc32p199.0, Vc3p222.3, Vc46a11.23	6	1861	24	52010	0.25	0.000160789	***	0.000933957	***	Ex vs Sa		255	GO:0071704	BP	organic substance metabolic process	Vc10a93.19, Vc13a167.14, Vc17a4.32, Vc1a342.28, Vc30s209.40, Vc32p198.25, Vc34a289.32, Vc35a186.33, Vc35a279.34, Vc36a168.19, Vc38s222.30, Vc40a92.13, Vc42a96.24, Vc45a64.28, Vc4a285.20, Vc5a320.23, Vc8a114.23, Vc8a192.29, Vc9a250.27	19	7813	40	52010	0.475	1.18434e-06	****	1.61442e-05	****	Ex vs Se		255	GO:0045493	BP	xylan catabolic process	Vc13p141.11, Vc16a122.23, Vc17s123.33, Vc18s72.38, Vc1p20.9, Vc30p225.1, Vc31a30.33, Vc32p230.1, Vc34a229.41, Vc45a82.25, Vc7a310.16, Vc8a395.25	12	9109	18	52010	0.6667	5.36027e-06	****	8.20227e-05	****	Se vs Sa		GO:0009718	BP
256	GO:0002229	BP	defense response to oomycetes	Vc17a56.35, Vc17s56.40, Vc17s56.41, Vc21a31.19, Vc26a31.27, Vc48a103.40	6	1861	24	52010	0.25	0.000160789	***	0.000933957	***	Ex vs Sa		256	GO:1902679	BP	negative regulation of RNA biosynthetic process	Vc102a4.41, Vc11a207.26, Vc15a200.28, Vc17s59.28, Vc18s180.19, Vc19a273.26, Vc22s130.28, Vc24a191.23, Vc2a237.26, Vc30a239.30, Vc34a250.32, Vc43s237.33, Vc46a10.21	13	7813	21	52010	0.619	1.2102e-06	****	1.63684e-05	****	Ex vs Se		256	GO:0051082	MF	unfolded protein binding	Vc1081a0.8, Vc12a270.28, Vc14a307.32, Vc14a325.38, Vc157a2.45, Vc159a2.43, Vc15p329.2, Vc16a288.25, Vc17a169.23, Vc17a341.47, Vc17p169.6, Vc17s144.15, Vc18s120.45, Vc19p357.13, Vc19s349.40, Vc20a42.41, Vc21a51.38, Vc21p134.1, Vc22a115.30, Vc22s81.47, Vc23a139.21, Vc24p83.21, Vc25a357.28, Vc25p281.2, Vc25s327.52, Vc26a52.34, Vc26p137.7, Vc27a132.27, Vc27a304.48, Vc27a333.41, Vc27p132.5, Vc28s314.4…	76	9109	266	52010	0.2857	5.55288e-06	****	8.46381e-05	****	Se vs Sa		GO:0002229	BP
257	GO:0010090	BP	trichome morphogenesis	Vc14p287.0, Vc21p54.4, Vc26a56.34, Vc29a55.29, Vc2p332.3, Vc33a280.28, Vc3p71.10	7	1861	34	52010	0.2059	0.000170829	***	0.000988413	***	Ex vs Sa		257	GO:0009678	MF	diphosphate hydrolysis-driven proton transmembrane transporter activity	Vc1335p0.1, Vc16p5.1, Vc17a169.23, Vc18p379.6, Vc27a132.27, Vc34a182.36, Vc39s35.41, Vc45a134.28, Vc60a8.35, Vc74a6.27, Vc75a6.31, Vc7p409.4, Vc81a2.28	13	7813	21	52010	0.619	1.2102e-06	****	1.63684e-05	****	Ex vs Se		257	GO:0051707	BP	response to other organism	Novel1860, Vc10a80.27, Vc10p265.7, Vc10p62.13, Vc12a234.13, Vc12a374.24, Vc14a102.30, Vc14a371.36, Vc14s37.41, Vc16s47.42, Vc17a145.18, Vc18a338.26, Vc1p355.5, Vc20p282.2, Vc20p283.6, Vc20p283.9, Vc23a57.33, Vc23p45.7, Vc23s167.35, Vc23s309.41, Vc23s342.41, Vc25a138.21, Vc25a307.30, Vc25a310.42, Vc27a97.27, Vc27s268.33, Vc28p85.6, Vc29a331.11, Vc29a9.38, Vc2a313.27, Vc2a357.31, Vc2a38.37, Vc2a425…	61	9109	201	52010	0.3035	5.77789e-06	****	8.77251e-05	****	Se vs Sa		GO:0010090	BP
258	GO:1901681	MF	sulfur compound binding	Vc10s265.34, Vc5s132.30, Vc8s287.21	3	1861	4	52010	0.75	0.000178061	***	0.000992383	***	Ex vs Sa		258	GO:0016207	MF	4-coumarate-CoA ligase activity	Novel0854, Vc11s396.32, Vc12s40.56, Vc1429s0.4, Vc14s140.24, Vc160a2.34, Vc17p323.0, Vc20s2.38, Vc22s254.43, Vc23a357.24, Vc27p288.0, Vc28a349.38, Vc34p57.9, Vc38a282.41, Vc38s101.15, Vc43a132.29, Vc44a237.18, Vc46a86.25, Vc47a69.26, Vc4s342.27, Vc50p21.6, Vc51a3.22, Vc6a422.25, Vc740a0.8, Vc9s317.36	25	7813	62	52010	0.4032	1.21985e-06	****	1.64348e-05	****	Ex vs Se		258	GO:0042989	BP	sequestering of actin monomers	Vc14a4.17, Vc25a15.18, Vc26a2.30, Vc316a0.33, Vc33a315.22, Vc33p326.5, Vc36a16.37, Vc3a426.25, Vc4a419.24	9	9109	11	52010	0.8182	6.03526e-06	****	9.0925e-05	****	Se vs Sa		GO:1901681	MF
259	GO:0033519	BP	phytyl diphosphate metabolic process	Vc35s263.41, Vc36a83.20, Vc9p333.2	3	1861	4	52010	0.75	0.000178061	***	0.000992383	***	Ex vs Sa		259	GO:0015288	MF	porin activity	Vc12p72.13, Vc13a156.17, Vc173a0.26, Vc23a339.31, Vc30a215.43, Vc30a329.22, Vc32a207.22, Vc32a288.37, Vc32s260.25, Vc32s269.43, Vc3a165.18, Vc40s3.44, Vc42a88.17, Vc94a4.22	14	7813	24	52010	0.5833	1.28782e-06	****	1.72171e-05	****	Ex vs Se		259	GO:0015172	MF	acidic amino acid transmembrane transporter activity	Vc16a1.33, Vc16a348.29, Vc18a382.64, Vc30a312.21, Vc31a296.32, Vc32a306.27, Vc3p147.8, Vc7a406.26, Vc7a59.34	9	9109	11	52010	0.8182	6.03526e-06	****	9.0925e-05	****	Se vs Sa		GO:0033519	BP
260	GO:0045550	MF	geranylgeranyl reductase activity	Vc35s263.41, Vc36a83.20, Vc9p333.2	3	1861	4	52010	0.75	0.000178061	***	0.000992383	***	Ex vs Sa		260	GO:0046930	CC	pore complex	Vc12p72.13, Vc13a156.17, Vc173a0.26, Vc23a339.31, Vc30a215.43, Vc30a329.22, Vc32a207.22, Vc32a288.37, Vc32s260.25, Vc32s269.43, Vc3a165.18, Vc40s3.44, Vc42a88.17, Vc94a4.22	14	7813	24	52010	0.5833	1.28782e-06	****	1.72171e-05	****	Ex vs Se		260	GO:0009733	BP	response to auxin	Vc11a245.18, Vc11a301.19, Vc11s221.30, Vc12p55.3, Vc13p292.3, Vc13p292.6, Vc13s257.23, Vc14p381.3, Vc14p381.8, Vc14s274.29, Vc15p217.9, Vc16a61.39, Vc20s83.23, Vc21a6.39, Vc23a277.22, Vc23a334.27, Vc23p128.24, Vc24a171.17, Vc26a4.25, Vc273a0.52, Vc29a1.29, Vc29p262.23, Vc2a234.22, Vc2p434.3, Vc2p434.8, Vc30a146.39, Vc30p110.5, Vc30s110.66, Vc30s313.31, Vc32a121.31, Vc32p101.11, Vc32p101.25, Vc32p…	49	9109	151	52010	0.3245	6.17503e-06	****	9.2673e-05	****	Se vs Sa		GO:0045550	MF
261	GO:0102067	MF	geranylgeranyl diphosphate reductase activity	Vc35s263.41, Vc36a83.20, Vc9p333.2	3	1861	4	52010	0.75	0.000178061	***	0.000992383	***	Ex vs Sa		261	GO:0033554	BP	cellular response to stress	Vc10p265.7, Vc13a83.25, Vc16a230.18, Vc16p71.20, Vc18a174.24, Vc19a36.26, Vc20s36.34, Vc214s1.45, Vc21p238.1, Vc22p180.0, Vc26p234.1, Vc29p226.18, Vc30s323.34, Vc31a171.19, Vc32s281.37, Vc34s275.45, Vc43a15.28, Vc45p51.10, Vc45p51.16, Vc46a60.18, Vc7a174.22, Vc8a287.20	22	7813	51	52010	0.4314	1.3548e-06	****	1.80432e-05	****	Ex vs Se		261	GO:0009058	BP	biosynthetic process	Novel4540, Vc10a95.29, Vc13a11.31, Vc16a226.21, Vc17s145.20, Vc18s178.23, Vc22a228.22, Vc24a300.37, Vc25a173.26, Vc25a351.19, Vc26a322.35, Vc27s109.30, Vc27s278.25, Vc27s331.34, Vc28a45.26, Vc2a67.14, Vc2p188.3, Vc30a267.28, Vc31s166.18, Vc32a329.33, Vc34a66.26, Vc34s205.30, Vc35a1.21, Vc35a197.37, Vc36a21.25, Vc36a217.31, Vc36s67.46, Vc3a334.17, Vc42a50.29, Vc42p25.21, Vc43a148.11, Vc44a106.28, …	40	9109	115	52010	0.3478	6.60981e-06	****	9.8814e-05	****	Se vs Sa		GO:0102067	MF
262	GO:0042335	BP	cuticle development	Vc54a12.26, Vc57a6.30, Vc57a7.37	3	1861	4	52010	0.75	0.000178061	***	0.000992383	***	Ex vs Sa		262	GO:0022900	BP	electron transport chain	Vc10a110.29, Vc10a342.30, Vc11a256.30, Vc12s114.36, Vc13a59.47, Vc13p47.9, Vc146a1.41, Vc14s313.40, Vc16a67.37, Vc16s97.20, Vc17a140.19, Vc17s44.41, Vc18a264.27, Vc18s329.39, Vc1a69.26, Vc1s320.35, Vc22a368.31, Vc25a311.40, Vc26p167.7, Vc28a278.37, Vc29p164.1, Vc2a369.26, Vc30a312.16, Vc31a54.20, Vc31p328.11, Vc32a305.29, Vc32a308.29, Vc32s307.32, Vc34s318.28, Vc35a306.31, Vc37a24.23, Vc37a75.26,…	55	7813	194	52010	0.2835	1.42464e-06	****	1.8901e-05	****	Ex vs Se		262	GO:1990404	MF	NAD+-protein ADP-ribosyltransferase activity	Novel5327, Vc11a282.19, Vc11a389.32, Vc15a266.30, Vc15a380.37, Vc19a314.35, Vc46a173.23, Vc51p10.12	8	9109	9	52010	0.8889	6.71084e-06	****	9.8814e-05	****	Se vs Sa		GO:0042335	BP
263	GO:0046164	BP	alcohol catabolic process	Vc14s19.34, Vc25s25.33, Vc37s189.25, Vc3a410.20	4	1861	9	52010	0.4444	0.000178189	***	0.000992383	***	Ex vs Sa		263	GO:0016620	MF	oxidoreductase activity, acting on the aldehyde or oxo group of donors, NAD or NADP as acceptor	Vc10s385.49, Vc12a13.29, Vc13a45.43, Vc14p228.2, Vc16a0.19, Vc18s382.86, Vc23a362.41, Vc25a273.30, Vc25s256.50, Vc2a245.40, Vc2a263.20, Vc32a320.33, Vc35a177.13, Vc36a177.9, Vc3a174.24, Vc3a191.27, Vc4p273.23, Vc5s16.37, Vc74a0.18, Vc75a1.32, Vc7a405.24, Vc81a6.36, Vc9p238.20	23	7813	55	52010	0.4182	1.51647e-06	****	2.00427e-05	****	Ex vs Se		263	GO:0042759	BP	long-chain fatty acid biosynthetic process	Vc11s340.47, Vc15s330.54, Vc17a17.17, Vc24p75.13, Vc34a256.30, Vc34s136.41, Vc45a31.29, Vc45p28.4	8	9109	9	52010	0.8889	6.71084e-06	****	9.8814e-05	****	Se vs Sa		GO:0046164	BP
264	GO:0120251	BP	hydrocarbon biosynthetic process	Vc156a2.43, Vc24a58.38, Vc30p264.6, Vc46a145.24	4	1861	9	52010	0.4444	0.000178189	***	0.000992383	***	Ex vs Sa		264	GO:0043473	BP	pigmentation	Vc13a41.36, Vc30a208.37, Vc30a297.38, Vc31a324.32, Vc32a323.35, Vc36p225.11, Vc42p20.3, Vc4p123.16, Vc7p48.23	9	7813	11	52010	0.8182	1.59702e-06	****	2.09481e-05	****	Ex vs Se		264	GO:0006536	BP	glutamate metabolic process	Vc12s360.40, Vc13a95.36, Vc13a95.37, Vc40a264.30, Vc40p258.7, Vc41a242.35, Vc44p159.2, Vc884a0.8	8	9109	9	52010	0.8889	6.71084e-06	****	9.8814e-05	****	Se vs Sa		GO:0120251	BP
265	GO:0031328	BP	positive regulation of cellular biosynthetic process	Vc21a112.20, Vc21a112.21, Vc29a112.21, Vc33a226.20	4	1861	9	52010	0.4444	0.000178189	***	0.000992383	***	Ex vs Sa		265	GO:0043069	BP	negative regulation of programmed cell death	Vc17a321.35, Vc22p51.36, Vc22s52.23, Vc27a286.23, Vc27a35.16, Vc34a311.27, Vc34s59.36, Vc50a20.17, Vc795a0.11	9	7813	11	52010	0.8182	1.59702e-06	****	2.09481e-05	****	Ex vs Se		265	GO:0006152	BP	purine nucleoside catabolic process	Vc199s0.45, Vc26p250.19, Vc27p218.22, Vc28a127.13, Vc29a243.20, Vc33a54.26, Vc35s41.26, Vc45a152.26	8	9109	9	52010	0.8889	6.71084e-06	****	9.8814e-05	****	Se vs Sa		GO:0031328	BP
266	GO:1900378	BP	positive regulation of secondary metabolite biosynthetic process	Vc21a112.20, Vc21a112.21, Vc29a112.21, Vc33a226.20	4	1861	9	52010	0.4444	0.000178189	***	0.000992383	***	Ex vs Sa		266	GO:0017040	MF	N-acylsphingosine amidohydrolase activity	Vc11s340.47, Vc15s330.54, Vc17a17.17, Vc24p75.13, Vc34a256.30, Vc45a31.29, Vc45p28.4	7	7813	7	52010	1	1.72236e-06	****	2.2092e-05	****	Ex vs Se		266	GO:0004565	MF	beta-galactosidase activity	Vc11a305.23, Vc126s3.69, Vc13a355.23, Vc14a377.25, Vc17a383.21, Vc20a167.17, Vc20a170.21, Vc22a263.37, Vc27a343.23, Vc28a156.23, Vc2a431.29, Vc30a44.29, Vc32p36.24, Vc34a19.23, Vc37s171.23, Vc42s241.40, Vc43a124.32, Vc46a95.26, Vc47a77.31, Vc6s286.38	20	9109	42	52010	0.4762	6.93071e-06	****	0.000101668	***	Se vs Sa		GO:1900378	BP
267	GO:0006085	BP	acetyl-CoA biosynthetic process	Vc4a11.38, Vc4a3.28, Vc4p32.6, Vc9s3.42	4	1861	9	52010	0.4444	0.000178189	***	0.000992383	***	Ex vs Sa		267	GO:0046514	BP	ceramide catabolic process	Vc11s340.47, Vc15s330.54, Vc17a17.17, Vc24p75.13, Vc34a256.30, Vc45a31.29, Vc45p28.4	7	7813	7	52010	1	1.72236e-06	****	2.2092e-05	****	Ex vs Se		267	GO:0030170	MF	pyridoxal phosphate binding	Novel4540, Vc10a26.18, Vc10a95.29, Vc10s114.37, Vc10s282.33, Vc11s276.32, Vc1202a0.9, Vc12s360.40, Vc13a11.31, Vc14a75.33, Vc14a79.29, Vc15s261.38, Vc16a226.21, Vc17p139.4, Vc17s145.20, Vc18s178.23, Vc19a308.29, Vc1a416.35, Vc1s316.32, Vc22a119.33, Vc237a0.46, Vc23p62.21, Vc24a123.31, Vc25a351.19, Vc25a363.28, Vc25a61.22, Vc27a9.10, Vc27p100.7, Vc27s109.30, Vc27s278.25, Vc27s331.34, Vc2p188.3, Vc…	62	9109	207	52010	0.2995	7.75542e-06	****	0.000112958	***	Se vs Sa		GO:0006085	BP
268	GO:0009331	CC	glycerol-3-phosphate dehydrogenase complex	Vc1326a0.7, Vc16a26.46, Vc18a376.35, Vc33a38.28, Vc7p401.11	5	1861	16	52010	0.3125	0.00018312	***	0.00100851	**	Ex vs Sa		268	GO:0102121	MF	ceramidase activity	Vc11s340.47, Vc15s330.54, Vc17a17.17, Vc24p75.13, Vc34a256.30, Vc45a31.29, Vc45p28.4	7	7813	7	52010	1	1.72236e-06	****	2.2092e-05	****	Ex vs Se		268	GO:0051537	MF	2 iron, 2 sulfur cluster binding	Vc10a110.29, Vc10a82.22, Vc11a294.25, Vc11a371.32, Vc11p349.6, Vc124a3.48, Vc12s158.21, Vc13a59.47, Vc13p47.9, Vc14s313.40, Vc15a364.32, Vc19a325.35, Vc19a374.29, Vc1a353.30, Vc1s320.35, Vc1s424.61, Vc20a330.28, Vc20a79.39, Vc24a106.31, Vc24a31.39, Vc24p52.7, Vc25a173.27, Vc28a278.37, Vc28a54.28, Vc2a233.19, Vc32a305.29, Vc33a183.32, Vc36s203.32, Vc36s63.42, Vc3a343.17, Vc42a4.37, Vc44a52.37, Vc4…	36	9109	100	52010	0.36	7.75824e-06	****	0.000112958	***	Se vs Sa		GO:0009331	CC
269	GO:0008271	MF	secondary active sulfate transmembrane transporter activity	Vc17s350.31, Vc27a313.28, Vc28a193.16, Vc34s32.27, Vc44a192.19	5	1861	16	52010	0.3125	0.00018312	***	0.00100851	**	Ex vs Sa		269	GO:0010158	BP	abaxial cell fate specification	Vc12a358.27, Vc23a40.19, Vc25a40.21, Vc2a57.23, Vc3a385.18, Vc40a256.30, Vc43a182.20	7	7813	7	52010	1	1.72236e-06	****	2.2092e-05	****	Ex vs Se		269	GO:0051592	BP	response to calcium ion	Vc11a315.22, Vc15a302.29, Vc17p9.0, Vc19p331.5, Vc21a65.51, Vc24a61.37, Vc27p7.2, Vc29a67.26, Vc30p297.14, Vc30s280.35, Vc33a271.32	11	9109	16	52010	0.6875	8.64697e-06	****	0.000124965	***	Se vs Sa		GO:0008271	MF
270	GO:0008509	MF	monoatomic anion transmembrane transporter activity	Vc17s350.31, Vc27a313.28, Vc28a193.16, Vc34s32.27, Vc44a192.19	5	1861	16	52010	0.3125	0.00018312	***	0.00100851	**	Ex vs Sa		270	GO:0019441	BP	tryptophan catabolic process to kynurenine	Vc14s355.43, Vc21p129.8, Vc266a0.57, Vc26p132.13, Vc29p130.1, Vc2s408.38, Vc33p207.4	7	7813	7	52010	1	1.72236e-06	****	2.2092e-05	****	Ex vs Se		270	GO:0004470	MF	malic enzyme activity	Vc187a1.54, Vc22s26.56, Vc26a0.15, Vc33a316.14, Vc33a324.17, Vc34a25.19, Vc35a283.38, Vc35a307.23, Vc36a42.30, Vc4s420.28, Vc9a396.27	11	9109	16	52010	0.6875	8.64697e-06	****	0.000124965	***	Se vs Sa		GO:0008509	MF
271	GO:0033075	BP	isoquinoline alkaloid biosynthetic process	Vc112a0.32, Vc20a101.22, Vc26a205.20, Vc29a198.27, Vc33a146.17, Vc37p212.7, Vc42p53.1	7	1861	35	52010	0.2	0.00020697	***	0.00113566	**	Ex vs Sa		271	GO:0015562	MF	efflux transmembrane transporter activity	Vc31s56.26, Vc37s99.32, Vc38a182.23, Vc54a12.26, Vc57a6.30, Vc57a7.37, Vc6s187.23	7	7813	7	52010	1	1.72236e-06	****	2.2092e-05	****	Ex vs Se		271	GO:0015386	MF	potassium:proton antiporter activity	Vc138a0.21, Vc16a256.16, Vc18a146.17, Vc1a44.30, Vc2s21.40, Vc31a202.21, Vc31a211.16, Vc3s419.29, Vc4a37.37, Vc5a43.25, Vc6s35.30, Vc7s187.31, Vc80a3.29, Vc8a372.32, Vc93a5.51, Vc9a12.33	16	9109	30	52010	0.5333	9.20898e-06	****	0.000132596	***	Se vs Sa		GO:0033075	BP
272	GO:0009058	BP	biosynthetic process	Novel3539, Vc13a36.41, Vc14p365.2, Vc25a173.26, Vc2a67.14, Vc32a329.32, Vc32a329.33, Vc35a1.21, Vc3a334.17, Vc42a25.30, Vc4p104.3, Vc6s140.37, Vc9p64.0	13	1861	115	52010	0.113	0.000249094	***	0.00136178	**	Ex vs Sa		272	GO:1990404	MF	NAD+-protein ADP-ribosyltransferase activity	Novel5327, Vc11a282.19, Vc11a389.32, Vc15a266.30, Vc15a380.37, Vc19a314.35, Vc46a173.23, Vc51p10.12	8	7813	9	52010	0.8889	2.01641e-06	****	2.54874e-05	****	Ex vs Se		272	GO:0098798	CC	mitochondrial protein-containing complex	Vc10p177.14, Vc124a3.48, Vc13s159.19, Vc15a334.27, Vc16a88.14, Vc19a107.19, Vc19a2.41, Vc20a104.15, Vc21a50.41, Vc22a368.31, Vc23a336.23, Vc2a233.19, Vc30a312.16, Vc30s313.31, Vc32s204.30, Vc32s306.42, Vc32s307.32, Vc36s203.32, Vc37a286.20, Vc37p181.1, Vc38a127.28, Vc39a134.10, Vc40a6.23, Vc42a6.35, Vc42p5.10, Vc42s90.21, Vc43a5.30, Vc47p192.8, Vc48s9.42, Vc5p177.10, Vc6a295.37, Vc6s405.38, Vc7a3…	34	9109	93	52010	0.3656	9.34649e-06	****	0.000134081	***	Se vs Sa		GO:0009058	BP
273	GO:0004620	MF	phospholipase activity	Vc15a58.22, Vc19a153.16, Vc22p160.2, Vc24a326.22, Vc46p41.0	5	1861	17	52010	0.2941	0.00025178	***	0.00137141	**	Ex vs Sa		273	GO:0006085	BP	acetyl-CoA biosynthetic process	Vc10a387.25, Vc1a16.36, Vc4a11.38, Vc4a3.28, Vc4p32.6, Vc5a14.25, Vc8a398.26, Vc9s3.42	8	7813	9	52010	0.8889	2.01641e-06	****	2.54874e-05	****	Ex vs Se		273	GO:0006720	BP	isoprenoid metabolic process	Vc1006a0.7, Vc11a229.36, Vc12s329.48, Vc13a286.23, Vc13p166.8, Vc14a174.42, Vc14a350.33, Vc16a7.25, Vc18p324.3, Vc18s382.86, Vc200a0.29, Vc20a359.28, Vc20a52.37, Vc20a56.37, Vc21s103.37, Vc22a47.36, Vc22s26.56, Vc22s304.47, Vc28s17.37, Vc2a404.33, Vc32a296.18, Vc32p199.0, Vc36a177.9, Vc36p33.3, Vc3a222.38, Vc43a71.27, Vc43a9.42, Vc454s0.28, Vc46a152.32, Vc46a199.38, Vc49a22.30, Vc4s420.28, Vc4s65…	39	9109	113	52010	0.3451	1.05558e-05	****	0.000150874	***	Se vs Sa		GO:0004620	MF
274	GO:0016639	MF	oxidoreductase activity, acting on the CH-NH2 group of donors, NAD or NADP as acceptor	Vc10a119.40, Vc1a311.33, Vc5a290.27, Vc8a140.37	4	1861	10	52010	0.4	0.000288549	***	0.00152695	**	Ex vs Sa		274	GO:0006536	BP	glutamate metabolic process	Vc12s360.40, Vc13a95.36, Vc13a95.37, Vc40a264.30, Vc40p258.7, Vc41a242.35, Vc44p159.2, Vc884a0.8	8	7813	9	52010	0.8889	2.01641e-06	****	2.54874e-05	****	Ex vs Se		274	GO:0005315	MF	inorganic phosphate transmembrane transporter activity	Vc10a260.15, Vc10p291.7, Vc117a2.46, Vc13a49.38, Vc17a330.31, Vc1a149.10, Vc1p115.0, Vc255s0.55, Vc27a288.30, Vc30a305.33, Vc32a12.31, Vc34a57.28, Vc42a12.33, Vc5p73.2, Vc5p73.3, Vc5s137.21, Vc7a414.33, Vc8a279.41, Vc8p300.2, Vc964a0.6	20	9109	43	52010	0.4651	1.08251e-05	****	0.000154158	***	Se vs Sa		GO:0016639	MF
275	GO:0005345	MF	purine nucleobase transmembrane transporter activity	Vc11a119.37, Vc18a63.33, Vc18s63.48, Vc31a281.60	4	1861	10	52010	0.4	0.000288549	***	0.00152695	**	Ex vs Sa		275	GO:0046164	BP	alcohol catabolic process	Vc14s19.34, Vc22a197.17, Vc25s25.33, Vc37s189.25, Vc3a410.20, Vc43a171.21, Vc46p82.24, Vc47a7.20	8	7813	9	52010	0.8889	2.01641e-06	****	2.54874e-05	****	Ex vs Se		275	GO:0009538	CC	photosystem I reaction center	Vc10p343.0, Vc11a360.27, Vc17a112.27, Vc19a283.11, Vc1p68.5, Vc24a41.40, Vc27a74.17, Vc34a29.24, Vc43a68.31, Vc46p156.1, Vc5p55.7, Vc8p354.4	12	9109	19	52010	0.6316	1.22166e-05	****	0.000172715	***	Se vs Sa		GO:0005345	MF
276	GO:0015211	MF	purine nucleoside transmembrane transporter activity	Vc11a119.37, Vc18a63.33, Vc18s63.48, Vc31a281.60	4	1861	10	52010	0.4	0.000288549	***	0.00152695	**	Ex vs Sa		276	GO:0000278	BP	mitotic cell cycle	Vc10a161.18, Vc11a8.21, Vc13a108.11, Vc13a78.32, Vc15p329.28, Vc16a348.28, Vc16a381.41, Vc17a17.16, Vc17s221.33, Vc18a15.26, Vc18a48.38, Vc20a291.18, Vc20a331.39, Vc22a248.23, Vc28a53.44, Vc28s81.28, Vc30a327.34, Vc31a295.31, Vc31a325.19, Vc32a266.23, Vc32s287.27, Vc34a256.31, Vc35a236.28, Vc44a240.22, Vc45a28.21, Vc45a31.32, Vc4a328.35, Vc5s288.39, Vc7a48.44, Vc7a59.35, Vc8p142.3	31	7813	88	52010	0.3523	2.21195e-06	****	2.78577e-05	****	Ex vs Se		276	GO:0017077	MF	oxidative phosphorylation uncoupler activity	Vc17s16.50, Vc22a290.27, Vc23p273.7, Vc34p257.19, Vc37a245.22, Vc39p71.7, Vc40p62.7, Vc41p4.3, Vc43a98.29, Vc45p29.15, Vc45p31.19, Vc46a143.20	12	9109	19	52010	0.6316	1.22166e-05	****	0.000172715	***	Se vs Sa		GO:0015211	MF
277	GO:0015860	BP	purine nucleoside transmembrane transport	Vc11a119.37, Vc18a63.33, Vc18s63.48, Vc31a281.60	4	1861	10	52010	0.4	0.000288549	***	0.00152695	**	Ex vs Sa		277	GO:1901362	BP	organic cyclic compound biosynthetic process	Novel4416, Vc148s2.69, Vc160a2.34, Vc16a105.25, Vc17a308.25, Vc17a308.26, Vc17a308.27, Vc18s292.31, Vc27a274.27, Vc27a274.28, Vc27p357.7, Vc32a98.23, Vc34a71.32, Vc34s71.38, Vc38s101.15, Vc42a199.39, Vc50a6.31, Vc50p7.9, Vc6a422.25, Vc8a79.42	20	7813	45	52010	0.4444	2.30705e-06	****	2.89505e-05	****	Ex vs Se		277	GO:0015079	MF	potassium ion transmembrane transporter activity	Vc10s148.19, Vc13p46.2, Vc15a377.33, Vc16s68.33, Vc18p328.12, Vc20s228.18, Vc21s46.37, Vc26a47.26, Vc28s126.21, Vc29s47.29, Vc30a302.34, Vc32p319.0, Vc42p15.6, Vc44s130.20, Vc51s14.33, Vc5s262.32, Vc7a356.28, Vc7a386.30, Vc8s163.23	19	9109	40	52010	0.475	1.22751e-05	****	0.000172916	***	Se vs Sa		GO:0015860	BP
278	GO:0047196	MF	long-chain-alcohol O-fatty-acyltransferase activity	Vc14p357.28, Vc38a226.17, Vc38s226.22, Vc6a138.21	4	1861	10	52010	0.4	0.000288549	***	0.00152695	**	Ex vs Sa		278	GO:0016229	MF	steroid dehydrogenase activity	Vc1102p0.1, Vc15a308.29, Vc17s293.34, Vc19a366.36, Vc21a150.23, Vc22a38.50, Vc29a151.24, Vc30s319.26, Vc33a186.25, Vc33a66.29, Vc36a33.15, Vc49a33.38, Vc526p0.3	13	7813	22	52010	0.5909	2.54907e-06	****	3.17583e-05	****	Ex vs Se		278	GO:0034220	BP	monoatomic ion transmembrane transport	Vc1043s0.10, Vc11a289.24, Vc12a376.30, Vc12a42.33, Vc12a5.23, Vc12s121.37, Vc13s82.36, Vc15a231.23, Vc16s68.33, Vc18a381.30, Vc18p328.12, Vc22a95.27, Vc23a58.37, Vc24a157.27, Vc26s291.22, Vc29a312.19, Vc29a7.41, Vc29s278.26, Vc32a55.30, Vc33s104.18, Vc34s6.46, Vc35a22.31, Vc37a26.30, Vc39a271.23, Vc40a279.35, Vc40a49.29, Vc41a21.19, Vc4a104.13, Vc4a225.20, Vc4a66.20, Vc4s131.48, Vc673a0.12, Vc6a1…	39	9109	114	52010	0.3421	1.33499e-05	****	0.000187379	***	Se vs Sa		GO:0047196	MF
279	GO:0010588	BP	cotyledon vascular tissue pattern formation	Vc1a359.30, Vc54a12.26, Vc57a6.30, Vc57a7.37	4	1861	10	52010	0.4	0.000288549	***	0.00152695	**	Ex vs Sa		279	GO:0009638	BP	phototropism	Vc11a285.25, Vc11s311.33, Vc14s165.36, Vc15a269.38, Vc15s296.32, Vc19a317.42, Vc22a302.27, Vc24a115.17, Vc24a91.31, Vc2a213.19, Vc43p74.11, Vc46p147.16, Vc47a124.39	13	7813	22	52010	0.5909	2.54907e-06	****	3.17583e-05	****	Ex vs Se		279	GO:0006820	BP	monoatomic anion transport	Vc12a42.33, Vc12a5.23, Vc26s22.45, Vc28s223.24, Vc29a7.41, Vc29s20.42, Vc32a55.30, Vc33a295.32, Vc36a62.33, Vc4s368.31	10	9109	14	52010	0.7143	1.35618e-05	****	0.000188993	***	Se vs Sa		GO:0010588	BP
280	GO:0043617	BP	cellular response to sucrose starvation	Vc22a294.17, Vc43a88.21, Vc43a95.21, Vc47a111.19	4	1861	10	52010	0.4	0.000288549	***	0.00152695	**	Ex vs Sa		280	GO:0048366	BP	leaf development	Vc10a105.22, Vc10a175.17, Vc10a224.19, Vc11a302.17, Vc13a159.12, Vc13p7.3, Vc15a322.27, Vc17a101.14, Vc19a350.27, Vc19a37.38, Vc1a220.30, Vc201s1.54, Vc20a37.42, Vc214s0.37, Vc24a82.28, Vc26s85.45, Vc28s319.35, Vc30p263.5, Vc34a295.15, Vc35a30.32, Vc35s201.18, Vc36p156.4, Vc42a90.16, Vc42p54.0, Vc45a12.16, Vc4s297.30, Vc517p0.2, Vc5a307.21, Vc5s205.22, Vc8a188.34, Vc8a237.20, Vc9s266.31	32	7813	93	52010	0.3441	2.7403e-06	****	3.40188e-05	****	Ex vs Se		280	GO:0140053	BP	mitochondrial gene expression	Vc13p66.11, Vc16a88.14, Vc19a107.19, Vc20a104.15, Vc26a298.34, Vc32s299.34, Vc37a286.20, Vc48s9.42, Vc6s405.38, Vc7a338.27	10	9109	14	52010	0.7143	1.35618e-05	****	0.000188993	***	Se vs Sa		GO:0043617	BP
281	GO:0045995	BP	regulation of embryonic development	Vc35s201.18, Vc36p156.4, Vc4s297.30, Vc9s266.31	4	1861	10	52010	0.4	0.000288549	***	0.00152695	**	Ex vs Sa		281	GO:0005507	MF	copper ion binding	Vc10a30.27, Vc10s377.34, Vc11a349.43, Vc11a364.40, Vc14a278.15, Vc14a389.31, Vc17a93.21, Vc17s19.29, Vc18p10.16, Vc19a26.20, Vc1p45.9, Vc24a52.36, Vc25a320.43, Vc28a198.19, Vc28p330.2, Vc2a443.34, Vc31p328.11, Vc32s235.26, Vc33a198.35, Vc33a254.26, Vc35a177.13, Vc35a270.26, Vc36a177.9, Vc36s268.40, Vc38s2.56, Vc3s80.25, Vc41a276.29, Vc42s67.33, Vc44a197.23, Vc48p89.5, Vc4p48.33, Vc5s23.39, Vc8s38…	35	7813	106	52010	0.3302	2.82841e-06	****	3.49877e-05	****	Ex vs Se		281	GO:0048316	BP	seed development	Vc10a317.24, Vc11p387.2, Vc14a355.39, Vc17a101.14, Vc20a373.32, Vc21a376.27, Vc21p261.1, Vc266a0.64, Vc26a364.26, Vc26p252.4, Vc28a3.33, Vc29a347.24, Vc2a408.35, Vc33a4.31, Vc33a55.22, Vc34a295.15, Vc35a177.13, Vc36a177.9, Vc44a229.35, Vc45a12.16, Vc9p238.20	21	9109	47	52010	0.4468	1.42248e-05	****	0.000197527	***	Se vs Sa		GO:0045995	BP
282	GO:0003993	MF	acid phosphatase activity	Vc10s265.34, Vc13a282.27, Vc26a92.24, Vc30a117.25, Vc32a93.26, Vc40a211.27, Vc42a195.21, Vc5s132.30, Vc8s287.21	9	1861	61	52010	0.1475	0.000305356	***	0.00161016	**	Ex vs Sa		282	GO:0051119	MF	sugar transmembrane transporter activity	Vc102a4.44, Vc118p3.13, Vc14a163.42, Vc14s198.21, Vc15a375.33, Vc18s102.19, Vc18s102.25, Vc25a199.22, Vc2a210.31, Vc2s237.30, Vc31s209.23, Vc31s210.37, Vc3a232.27, Vc43s263.34, Vc46a200.26, Vc47a180.36, Vc7a100.29, Vc7s188.32, Vc7s188.35	19	7813	42	52010	0.4524	2.97415e-06	****	3.65306e-05	****	Ex vs Se		282	GO:0009744	BP	response to sucrose	Vc10a375.26, Vc115p2.20, Vc13a98.30, Vc140a1.34, Vc14a355.39, Vc16a390.30, Vc266a0.64, Vc2a408.35, Vc31a334.43, Vc31a338.28, Vc32a261.26, Vc32a268.24, Vc35a177.13, Vc36a177.9, Vc38a123.26, Vc39s131.28, Vc42s58.46, Vc43a88.21, Vc60s7.24, Vc74a7.30, Vc75a7.29, Vc7a7.36, Vc81a1.30, Vc847a0.8, Vc9p238.20	25	9109	61	52010	0.4098	1.44445e-05	****	0.000199867	***	Se vs Sa		GO:0003993	MF
283	GO:0008610	BP	lipid biosynthetic process	Vc17a308.27, Vc22a60.28, Vc22p59.6, Vc27a274.28, Vc34s71.38, Vc37a293.17, Vc38a282.38, Vc50p7.9	8	1861	49	52010	0.1633	0.000322786	***	0.00169605	**	Ex vs Sa		283	GO:0004805	MF	trehalose-phosphatase activity	Vc10a342.30, Vc12a215.16, Vc15a159.14, Vc1a69.26, Vc22a142.24, Vc22p180.0, Vc23a240.13, Vc24s214.30, Vc26a82.30, Vc32a7.29, Vc39s90.9, Vc40a87.29, Vc43a226.19, Vc46a22.31, Vc46a60.18, Vc46p22.11, Vc5a56.26, Vc5s373.29, Vc8a353.26	19	7813	42	52010	0.4524	2.97415e-06	****	3.65306e-05	****	Ex vs Se		283	GO:0016102	BP	diterpenoid biosynthetic process	Vc15a369.30, Vc19a379.34, Vc24a26.32, Vc35a89.23, Vc35s90.60, Vc39p78.6, Vc39s79.31, Vc4a177.21, Vc4a177.22, Vc4s177.24, Vc4s180.34, Vc6a338.34, Vc9a132.34	13	9109	22	52010	0.5909	1.47204e-05	****	0.00020225	***	Se vs Sa		GO:0008610	BP
284	GO:0044550	BP	secondary metabolite biosynthetic process	Novel4416, Vc12a80.32, Vc23a330.25, Vc2a379.38, Vc38a291.14, Vc3a29.38, Vc40a12.24, Vc41p59.2, Vc7a342.29	9	1861	62	52010	0.1452	0.000345975	***	0.0018115	**	Ex vs Sa		284	GO:0008017	MF	microtubule binding	Vc10a2.36, Vc10a316.34, Vc13s285.50, Vc14a121.25, Vc1a444.28, Vc20a161.24, Vc20a331.39, Vc21p266.4, Vc21s326.34, Vc22a117.29, Vc23s179.23, Vc26a256.29, Vc28a163.24, Vc28a53.44, Vc28s69.20, Vc29s305.37, Vc2s96.26, Vc30a108.31, Vc30a113.20, Vc31s37.24, Vc33a118.14, Vc33a60.26, Vc36s68.27, Vc36s70.43, Vc36s75.39, Vc37s246.22, Vc38a288.31, Vc39s43.35, Vc3a287.17, Vc3s319.25, Vc40s140.14, Vc414s0.14, …	43	7813	142	52010	0.3028	3.01746e-06	****	3.6932e-05	****	Ex vs Se		284	GO:0006097	BP	glyoxylate cycle	Vc1a20.21, Vc23a40.20, Vc2a393.33, Vc35a277.30, Vc36s49.50, Vc37s29.46, Vc38a235.19, Vc39s265.30, Vc4a5.29, Vc4s31.77, Vc6s106.41, Vc8s395.32, Vc9a360.40	13	9109	22	52010	0.5909	1.47204e-05	****	0.00020225	***	Se vs Sa		GO:0044550	BP
285	GO:0006970	BP	response to osmotic stress	Vc11p91.5, Vc15p95.6, Vc21p317.7, Vc24p307.5, Vc26p310.1, Vc29p297.6, Vc6p99.13	7	1861	38	52010	0.1842	0.000353733	***	0.00183917	**	Ex vs Sa		285	GO:0005978	BP	glycogen biosynthetic process	Vc10s4.44, Vc12a38.26, Vc12a66.22, Vc1s442.37, Vc2s154.34, Vc30a126.31, Vc42p186.12, Vc5s421.33, Vc761p0.0, Vc8s4.37	10	7813	14	52010	0.7143	3.24622e-06	****	3.95925e-05	****	Ex vs Se		285	GO:0004252	MF	serine-type endopeptidase activity	Novel4039, Vc10s181.40, Vc114a0.29, Vc11a240.22, Vc11a382.35, Vc11s364.55, Vc12a82.26, Vc13a118.26, Vc14a274.20, Vc14a389.30, Vc15a235.26, Vc17a359.33, Vc17a387.48, Vc17p368.3, Vc18p10.9, Vc18s339.45, Vc20s156.26, Vc23p303.0, Vc23p314.7, Vc23s53.53, Vc25a317.25, Vc26p75.3, Vc27a337.38, Vc27s142.28, Vc27s177.26, Vc27s332.32, Vc27s67.26, Vc28s167.34, Vc2a411.27, Vc30a252.34, Vc30a337.37, Vc31p330.3…	62	9109	211	52010	0.2938	1.50158e-05	****	0.000205585	***	Se vs Sa		GO:0006970	BP
286	GO:0035639	MF	purine ribonucleoside triphosphate binding	Vc35s201.18, Vc36p156.4, Vc4a11.38, Vc4a3.28, Vc4p32.6, Vc4s297.30, Vc9s3.42	7	1861	38	52010	0.1842	0.000353733	***	0.00183917	**	Ex vs Sa		286	GO:0006857	BP	oligopeptide transport	Vc14a192.36, Vc15a315.31, Vc19a127.27, Vc19s360.29, Vc24s73.43, Vc28a158.33, Vc28a222.20, Vc2a232.32, Vc35a221.31, Vc36a129.18, Vc44s159.26, Vc4a314.31, Vc72a7.63, Vc8a182.20, Vc8s282.45, Vc9a289.29	16	7813	32	52010	0.5	3.53876e-06	****	4.30095e-05	****	Ex vs Se		286	GO:0097708	CC	intracellular vesicle	Vc12a286.31, Vc14a239.15, Vc16s17.43, Vc16s34.52, Vc19a127.27, Vc20s125.28, Vc23a107.30, Vc25p235.8, Vc28a222.20, Vc2a234.22, Vc2a278.22, Vc3a161.20, Vc41a168.32, Vc43a169.18, Vc47a9.14, Vc7a391.27	16	9109	31	52010	0.5161	1.59327e-05	****	0.000217375	***	Se vs Sa		GO:0035639	MF
287	GO:0009698	BP	phenylpropanoid metabolic process	Novel0854, Vc17p323.0, Vc20s2.38, Vc27p288.0, Vc28a349.38, Vc34p57.9, Vc38s101.15, Vc44a237.18, Vc50p21.6, Vc6a422.25	10	1861	77	52010	0.1299	0.000415777	***	0.00215422	**	Ex vs Sa		287	GO:0008643	BP	carbohydrate transport	Vc102a4.44, Vc10s13.29, Vc10s398.35, Vc115p2.20, Vc118p3.13, Vc12a71.36, Vc13a252.24, Vc13a7.23, Vc146a2.57, Vc14a274.20, Vc14s198.21, Vc15a375.33, Vc16a213.28, Vc16a390.30, Vc21a22.26, Vc21a317.34, Vc22s132.37, Vc23a340.25, Vc23p27.5, Vc23s85.40, Vc26a18.34, Vc26a309.28, Vc29a17.49, Vc29a297.28, Vc2s192.39, Vc2s237.30, Vc30a150.47, Vc30a263.27, Vc31a334.43, Vc32a142.28, Vc33a297.25, Vc3a249.22, …	43	7813	143	52010	0.3007	3.69176e-06	****	4.47128e-05	****	Ex vs Se		287	GO:0015385	MF	sodium:proton antiporter activity	Vc138a0.21, Vc16a256.16, Vc18a146.17, Vc1a44.30, Vc31a202.21, Vc31a211.16, Vc4a37.37, Vc5a43.25, Vc6s35.30, Vc7s187.31, Vc80a3.29, Vc8a372.32, Vc93a5.51, Vc9a12.33	14	9109	25	52010	0.56	1.6056e-05	****	0.000218294	***	Se vs Sa		GO:0009698	BP
288	GO:0046246	BP	terpene biosynthetic process	Vc17s219.15, Vc27p200.0, Vc45a200.22	3	1861	5	52010	0.6	0.000433246	***	0.00220585	**	Ex vs Sa		288	GO:0016791	MF	phosphatase activity	Novel3206, Vc11a395.31, Vc12a290.25, Vc14s203.18, Vc15a386.30, Vc17a380.29, Vc17a63.26, Vc18s236.23, Vc19a37.39, Vc20a37.43, Vc214s0.36, Vc21a145.19, Vc22a19.24, Vc23s103.32, Vc24a2.30, Vc26a148.16, Vc27a30.24, Vc27s340.32, Vc28a319.27, Vc29a121.24, Vc29a145.15, Vc31s178.17, Vc33s192.37, Vc34s260.51, Vc36s299.40, Vc3a195.23, Vc40a184.32, Vc41a171.18, Vc463a0.13, Vc51a3.26, Vc7s166.30	31	7813	90	52010	0.3444	3.79995e-06	****	4.58633e-05	****	Ex vs Se		288	GO:0045330	MF	aspartyl esterase activity	Novel5165, Vc10a387.31, Vc11a190.18, Vc11a198.29, Vc13a81.25, Vc17s367.32, Vc20a10.35, Vc22a40.44, Vc27s330.33, Vc28a341.26, Vc30a325.29, Vc34a2.28, Vc34a2.29, Vc48a101.27, Vc873a0.8	15	9109	28	52010	0.5357	1.6378e-05	****	0.000221899	***	Se vs Sa		GO:0046246	BP
289	GO:0080019	MF	alcohol-forming very long-chain fatty acyl-CoA reductase activity	Vc22s240.29, Vc43s144.22, Vc47s54.13	3	1861	5	52010	0.6	0.000433246	***	0.00220585	**	Ex vs Sa		289	GO:0031418	MF	L-ascorbic acid binding	Novel0966, Novel2248, Vc11s212.32, Vc1260a0.2, Vc13a41.36, Vc15s190.29, Vc15s205.28, Vc16a381.32, Vc191s1.61, Vc22a131.24, Vc23a13.16, Vc28a184.20, Vc28a99.17, Vc30a297.38, Vc30s331.26, Vc31a324.32, Vc32a289.30, Vc32a323.35, Vc32a328.21, Vc33a61.31, Vc33p213.10, Vc33p61.8, Vc33s291.32, Vc42p20.3, Vc43p36.14, Vc44a180.34, Vc44a238.23, Vc46a11.23, Vc46a172.36, Vc47p162.16, Vc53a11.30, Vc5a375.25, V…	36	7813	112	52010	0.3214	4.15068e-06	****	4.9923e-05	****	Ex vs Se		289	GO:0000976	MF	transcription cis-regulatory region binding	Novel3913, Vc11s282.27, Vc130a1.37, Vc13a111.16, Vc13s257.23, Vc14p286.9, Vc15a266.29, Vc15a339.25, Vc16s123.42, Vc17a20.19, Vc17s166.24, Vc18a271.38, Vc18a55.38, Vc18p40.7, Vc19s313.32, Vc1p199.5, Vc20a167.17, Vc20a170.21, Vc20a54.31, Vc21a2.29, Vc21a363.31, Vc239a0.53, Vc23p326.0, Vc24a51.34, Vc24s118.41, Vc25p329.4, Vc25s349.39, Vc26p350.1, Vc28a156.23, Vc28a304.28, Vc29a312.19, Vc29a338.24, V…	77	9109	279	52010	0.276	1.8743e-05	****	0.000253063	***	Se vs Sa		GO:0080019	MF
290	GO:0102965	MF	alcohol-forming long-chain fatty acyl-CoA reductase activity	Vc22s240.29, Vc43s144.22, Vc47s54.13	3	1861	5	52010	0.6	0.000433246	***	0.00220585	**	Ex vs Sa		290	GO:0009882	MF	blue light photoreceptor activity	Vc11s311.33, Vc14s165.36, Vc15s296.32, Vc18s75.37, Vc24a91.31, Vc2a213.19, Vc35a22.28, Vc36s260.34, Vc4a65.46, Vc7a86.36, Vc9s40.39	11	7813	17	52010	0.6471	4.46307e-06	****	5.34953e-05	****	Ex vs Se		290	GO:0044550	BP	secondary metabolite biosynthetic process	Vc1169p0.0, Vc11a345.31, Vc12a84.45, Vc13a136.42, Vc14a192.34, Vc15a239.39, Vc15s334.29, Vc18s48.44, Vc211a0.22, Vc211a0.23, Vc22a197.17, Vc24a56.29, Vc2s399.76, Vc30a169.20, Vc32a151.27, Vc36a54.44, Vc38a291.14, Vc3a203.34, Vc3a29.38, Vc41a56.37, Vc41a59.21, Vc43a171.21, Vc46p82.24, Vc47a7.20, Vc7a342.29	25	9109	62	52010	0.4032	2.0192e-05	****	0.000269216	***	Se vs Sa		GO:0102965	MF
291	GO:0051761	BP	sesquiterpene metabolic process	Vc24a58.38, Vc30p264.6, Vc46a145.24	3	1861	5	52010	0.6	0.000433246	***	0.00220585	**	Ex vs Sa		291	GO:0008652	BP	amino acid biosynthetic process	Vc12p239.1, Vc16a328.28, Vc16a67.37, Vc16p232.2, Vc18s329.39, Vc19s62.29, Vc22a39.37, Vc23a128.29, Vc23a252.31, Vc23p119.12, Vc24s67.47, Vc28s293.33, Vc28s70.33, Vc30a270.32, Vc40a166.23, Vc40p75.7, Vc41a155.30, Vc41a65.20, Vc42a46.35, Vc42s22.29, Vc48s57.36, Vc7a357.32, Vc7p146.2	23	7813	58	52010	0.3966	4.51604e-06	****	5.39442e-05	****	Ex vs Se		291	GO:0009809	BP	lignin biosynthetic process	Vc12p300.7, Vc13s341.30, Vc14a183.19, Vc15a294.29, Vc16s125.41, Vc17a235.23, Vc1a373.37, Vc20a5.31, Vc23p90.4, Vc30p58.9, Vc31s35.41, Vc32p21.11, Vc34s139.31, Vc37a253.26, Vc37a254.29, Vc37s211.34, Vc39a61.32, Vc3a213.23, Vc40p195.0, Vc42p262.6, Vc45s216.26, Vc578s0.21, Vc6a364.11, Vc6s313.31, Vc7a307.20	25	9109	62	52010	0.4032	2.0192e-05	****	0.000269216	***	Se vs Sa		GO:0051761	BP
292	GO:0033385	BP	geranylgeranyl diphosphate metabolic process	Vc35s263.41, Vc36a83.20, Vc9p333.2	3	1861	5	52010	0.6	0.000433246	***	0.00220585	**	Ex vs Sa		292	GO:0098827	CC	endoplasmic reticulum subcompartment	Vc10s177.20, Vc13a238.27, Vc13a252.24, Vc17s1.16, Vc1s256.32, Vc21p224.11, Vc22a304.29, Vc22a8.25, Vc22s227.27, Vc24a56.29, Vc27p357.7, Vc28s139.28, Vc30a150.47, Vc31a73.24, Vc32a142.28, Vc33a312.21, Vc34a291.26, Vc34a301.12, Vc42s127.24, Vc43a72.30, Vc43s149.16, Vc46a151.30, Vc46s118.33, Vc47a126.34, Vc47s37.22, Vc6a412.16, Vc85s1.21	27	7813	74	52010	0.3649	4.57062e-06	****	5.43117e-05	****	Ex vs Se		292	GO:0046373	BP	L-arabinose metabolic process	Vc10a173.27, Vc11a32.30, Vc15a40.12, Vc1a259.28, Vc37a160.20, Vc38a147.24, Vc39a152.14, Vc5a238.12, Vc6a275.33	9	9109	12	52010	0.75	2.03533e-05	****	0.000269216	***	Se vs Sa		GO:0033385	BP
293	GO:0043565	MF	sequence-specific DNA binding	Vc10a390.33, Vc11a207.26, Vc11s334.37, Vc14p199.7, Vc15a200.28, Vc15a360.46, Vc15s305.29, Vc15s324.35, Vc17p311.1, Vc18a364.34, Vc19a273.26, Vc19a368.29, Vc21a177.35, Vc22a10.31, Vc24a191.23, Vc24s64.33, Vc27p275.4, Vc29a172.20, Vc2p239.1, Vc30a239.30, Vc32a245.19, Vc32a316.27, Vc32p119.6, Vc33a170.18, Vc34p69.6, Vc37a238.15, Vc39a109.22, Vc39a82.12, Vc43a232.31, Vc46a16.20, Vc8a74.30	31	1861	449	52010	0.069	0.000439863	***	0.00220585	**	Ex vs Sa		293	GO:0019252	BP	starch biosynthetic process	Vc10s4.44, Vc12a38.26, Vc12a66.22, Vc1s442.37, Vc22s351.42, Vc2a121.32, Vc30a126.31, Vc35p50.29, Vc35s201.18, Vc36a211.37, Vc36p156.4, Vc3a277.21, Vc42p186.12, Vc4s297.30, Vc5s421.33, Vc761p0.0, Vc8s4.37, Vc9a96.31, Vc9s266.31	19	7813	43	52010	0.4419	4.57806e-06	****	5.43117e-05	****	Ex vs Se		293	GO:0140021	BP	mitochondrial ADP transmembrane transport	Vc11a42.14, Vc21a7.18, Vc26a4.26, Vc29p1.6, Vc33a313.35, Vc35a303.33, Vc36a19.34, Vc4a425.42, Vc9a391.27	9	9109	12	52010	0.75	2.03533e-05	****	0.000269216	***	Se vs Sa		GO:0043565	MF
294	GO:0006081	BP	cellular aldehyde metabolic process	Vc11p43.4, Vc13a45.43, Vc24a317.26, Vc32a320.33	4	1861	11	52010	0.3636	0.000440577	***	0.00220585	**	Ex vs Sa		294	GO:0072488	BP	ammonium transmembrane transport	Vc10a342.30, Vc12a215.16, Vc15a159.14, Vc17a70.31, Vc1a69.26, Vc23a240.13, Vc24s214.30, Vc25a145.23, Vc32a7.29, Vc40a87.29, Vc5a56.26, Vc74a3.39, Vc81a4.30, Vc8a353.26	14	7813	26	52010	0.5385	4.70269e-06	****	5.54121e-05	****	Ex vs Se		294	GO:0009044	MF	xylan 1,4-beta-xylosidase activity	Vc16a122.23, Vc17s123.33, Vc18s72.38, Vc1p20.9, Vc31a30.33, Vc34a229.41, Vc45a82.25, Vc7a310.16, Vc8a395.25	9	9109	12	52010	0.75	2.03533e-05	****	0.000269216	***	Se vs Sa		GO:0006081	BP
295	GO:0016614	MF	oxidoreductase activity, acting on CH-OH group of donors	Vc14a115.38, Vc14s112.39, Vc25a146.28, Vc3a324.28	4	1861	11	52010	0.3636	0.000440577	***	0.00220585	**	Ex vs Sa		295	GO:0009833	BP	plant-type primary cell wall biogenesis	Vc14a269.40, Vc25s315.38, Vc26a18.27, Vc2a317.29, Vc35a131.33, Vc35s26.28, Vc36s299.43, Vc39a279.32, Vc39a279.34, Vc3a93.23, Vc43a261.31, Vc43a44.42, Vc6a97.28, Vc7a204.26	14	7813	26	52010	0.5385	4.70269e-06	****	5.54121e-05	****	Ex vs Se		295	GO:0051453	BP	regulation of intracellular pH	Vc17a253.34, Vc18s349.50, Vc27a234.32, Vc30p330.8, Vc34a122.18, Vc55a7.22, Vc56a11.54, Vc7s374.47, Vc95p0.8	9	9109	12	52010	0.75	2.03533e-05	****	0.000269216	***	Se vs Sa		GO:0016614	MF
296	GO:0090353	MF	polygalacturonase inhibitor activity	Vc22p82.4, Vc29s336.30, Vc33p17.8, Vc645p0.4	4	1861	11	52010	0.3636	0.000440577	***	0.00220585	**	Ex vs Sa		296	GO:0048653	BP	anther development	Vc10a348.25, Vc11s282.27, Vc11s61.32, Vc19s313.32, Vc21p326.1, Vc35a30.32, Vc36p77.4, Vc47p52.17, Vc5a37.39, Vc8a360.23, Vc8a361.35, Vc9a340.32	12	7813	20	52010	0.6	5.03424e-06	****	5.91183e-05	****	Ex vs Se		296	GO:0003729	MF	mRNA binding	Novel0125, Novel0194, Novel1996, Novel2381, Vc106s4.53, Vc10a174.12, Vc10a317.24, Vc10a40.33, Vc10a66.26, Vc10p371.5, Vc10s10.35, Vc10s366.34, Vc114a0.28, Vc117a2.46, Vc11a232.28, Vc11a245.18, Vc11a382.34, Vc11p339.11, Vc11s122.40, Vc12a345.40, Vc12a38.31, Vc12a8.28, Vc132a3.28, Vc13a49.38, Vc13p104.2, Vc13p257.8, Vc14s44.37, Vc1529s0.7, Vc15a89.32, Vc15p177.9, Vc15p210.24, Vc15p223.10, Vc15p329.…	179	9109	766	52010	0.2337	2.08237e-05	****	0.000274507	***	Se vs Sa		GO:0090353	MF
297	GO:0016116	BP	carotenoid metabolic process	Vc35s201.18, Vc36p156.4, Vc4s297.30, Vc9s266.31	4	1861	11	52010	0.3636	0.000440577	***	0.00220585	**	Ex vs Sa		297	GO:0005459	MF	UDP-galactose transmembrane transporter activity	Vc13a252.24, Vc13a7.23, Vc14a274.20, Vc21a317.34, Vc26a309.28, Vc29a297.28, Vc2s192.39, Vc30a150.47, Vc30a263.27, Vc32a142.28, Vc3a249.22, Vc3a84.39, Vc42a54.34	13	7813	23	52010	0.5652	5.05265e-06	****	5.91347e-05	****	Ex vs Se		297	GO:0005788	CC	endoplasmic reticulum lumen	Vc11a382.39, Vc11p330.36, Vc14a307.32, Vc174a1.33, Vc17p169.6, Vc21a152.24, Vc21s175.40, Vc24a84.33, Vc25a357.28, Vc25s327.52, Vc26a155.35, Vc26a49.34, Vc27a35.20, Vc27p132.5, Vc29a48.43, Vc29p153.14, Vc29s169.31, Vc2a360.27, Vc2s150.26, Vc33a185.36, Vc33s172.23, Vc34a182.35, Vc39a141.17, Vc3a300.21, Vc3a47.23, Vc3s74.40, Vc45p134.7, Vc4p425.20, Vc9s391.46	29	9109	77	52010	0.3766	2.15729e-05	****	0.000283426	***	Se vs Sa		GO:0016116	BP
298	GO:0010089	BP	xylem development	Vc21a112.20, Vc21a112.21, Vc29a112.21, Vc33a226.20, Vc43s237.33	5	1861	19	52010	0.2632	0.000445705	***	0.00222404	**	Ex vs Sa		298	GO:0004857	MF	enzyme inhibitor activity	Vc11a190.18, Vc11a198.29, Vc17s367.32, Vc19p25.22, Vc20a10.35, Vc22a40.44, Vc23a152.22, Vc23p152.2, Vc27s330.33, Vc28p187.1, Vc34a2.28, Vc34a2.29, Vc37a186.29, Vc40s142.27, Vc42a105.25, Vc44p186.0, Vc48a101.27, Vc54s11.33, Vc71p4.8, Vc873a0.8	20	7813	47	52010	0.4255	5.24064e-06	****	6.11291e-05	****	Ex vs Se		298	GO:0030599	MF	pectinesterase activity	Novel5165, Vc10a387.31, Vc11a190.18, Vc11a198.29, Vc13a81.25, Vc17s367.32, Vc20a10.35, Vc22a40.44, Vc27s330.33, Vc28a341.26, Vc28p187.1, Vc30a325.29, Vc34a2.28, Vc34a2.29, Vc44p186.0, Vc48a101.27, Vc71p4.8, Vc873a0.8	18	9109	38	52010	0.4737	2.17618e-05	****	0.000284948	***	Se vs Sa		GO:0010089	BP
299	GO:0015995	BP	chlorophyll biosynthetic process	Vc11a145.15, Vc15a134.19, Vc24a250.20, Vc35s201.18, Vc35s263.41, Vc36a83.20, Vc36p156.4, Vc4s297.30, Vc9p333.2, Vc9s266.31	10	1861	78	52010	0.1282	0.000461808	***	0.00229668	**	Ex vs Sa		299	GO:0046593	MF	mandelonitrile lyase activity	Vc10a280.34, Vc14a115.38, Vc14s112.39, Vc17s143.21, Vc25a146.28, Vc34s207.24, Vc3a324.28, Vc5a117.19, Vc8s296.44	9	7813	12	52010	0.75	5.528e-06	****	6.34169e-05	****	Ex vs Se		299	GO:0009055	MF	electron transfer activity	Vc10a110.29, Vc11a256.30, Vc11p349.6, Vc12a317.27, Vc13a59.47, Vc13s100.34, Vc13s159.19, Vc1410a0.7, Vc14s313.40, Vc16a67.37, Vc16s97.20, Vc17a140.19, Vc17s44.41, Vc18s299.27, Vc18s329.39, Vc1s320.35, Vc20a79.39, Vc20s273.27, Vc23p76.1, Vc24p52.7, Vc25a311.40, Vc25a363.28, Vc28a278.37, Vc28a94.28, Vc2s313.38, Vc2s425.36, Vc30a312.16, Vc31p328.11, Vc32a305.29, Vc32s204.30, Vc32s307.32, Vc34s318.28…	50	9109	162	52010	0.3086	2.32257e-05	****	0.0003031	***	Se vs Sa		GO:0015995	BP
300	GO:0009570	CC	chloroplast stroma	Vc10p43.7, Vc11a288.26, Vc12a348.33, Vc15a272.36, Vc16p23.9, Vc17a277.15, Vc18a373.31, Vc19a320.28, Vc1p398.3, Vc24a111.29, Vc25s343.41, Vc27s252.33, Vc33p38.6, Vc34s101.28, Vc47p59.3, Vc5p375.4, Vc7s397.42, Vc9a33.33, Vc9p405.15	19	1861	225	52010	0.0844	0.000517808	***	0.0025666	**	Ex vs Sa		300	GO:0016106	BP	sesquiterpenoid biosynthetic process	Vc11a233.23, Vc15a227.19, Vc16a174.22, Vc18s145.24, Vc1p398.3, Vc24a160.31, Vc24p122.11, Vc5p375.4, Vc7a143.23	9	7813	12	52010	0.75	5.528e-06	****	6.34169e-05	****	Ex vs Se		300	GO:0006032	BP	chitin catabolic process	Vc12a10.30, Vc12p382.8, Vc13a314.25, Vc23p16.11, Vc23p16.4, Vc23p17.1, Vc23p52.20, Vc23s17.40, Vc30s82.54, Vc32s66.30, Vc35a54.42, Vc36a216.26, Vc41a264.29, Vc41p264.23, Vc42a213.43, Vc53a15.50, Vc53a15.52, Vc53p15.32, Vc6s3.36, Vc9a90.20	20	9109	45	52010	0.4444	2.49423e-05	****	0.000324416	***	Se vs Sa		GO:0009570	CC
301	GO:0031540	BP	regulation of anthocyanin biosynthetic process	Novel4416, Vc13a46.32, Vc30a303.29, Vc32a318.21, Vc42a14.30	5	1861	20	52010	0.25	0.00057682	***	0.00284961	**	Ex vs Sa		301	GO:0043289	BP	apocarotenoid biosynthetic process	Vc11a233.23, Vc15a227.19, Vc16a174.22, Vc18s145.24, Vc1p398.3, Vc24a160.31, Vc24p122.11, Vc5p375.4, Vc7a143.23	9	7813	12	52010	0.75	5.528e-06	****	6.34169e-05	****	Ex vs Se		301	GO:0048653	BP	anther development	Vc10a348.25, Vc11s282.27, Vc11s61.32, Vc19s313.32, Vc35a30.32, Vc36p77.4, Vc47p52.17, Vc4s58.34, Vc5a37.39, Vc8a360.23, Vc8a361.35, Vc9a340.32	12	9109	20	52010	0.6	2.56512e-05	****	0.000329247	***	Se vs Sa		GO:0031540	BP
302	GO:0016106	BP	sesquiterpenoid biosynthetic process	Vc18s145.24, Vc1p398.3, Vc5p375.4, Vc7a143.23	4	1861	12	52010	0.3333	0.000642151	***	0.00309022	**	Ex vs Sa		302	GO:1902645	BP	tertiary alcohol biosynthetic process	Vc11a233.23, Vc15a227.19, Vc16a174.22, Vc18s145.24, Vc1p398.3, Vc24a160.31, Vc24p122.11, Vc5p375.4, Vc7a143.23	9	7813	12	52010	0.75	5.528e-06	****	6.34169e-05	****	Ex vs Se		302	GO:0080162	BP	endoplasmic reticulum to cytosol auxin transport	Vc10s177.20, Vc12a29.28, Vc12s18.50, Vc13a33.40, Vc17s1.16, Vc1s256.32, Vc23a366.26, Vc23s55.28, Vc30a289.21, Vc32s331.35, Vc34a291.26, Vc42s27.54	12	9109	20	52010	0.6	2.56512e-05	****	0.000329247	***	Se vs Sa		GO:0016106	BP
303	GO:0043289	BP	apocarotenoid biosynthetic process	Vc18s145.24, Vc1p398.3, Vc5p375.4, Vc7a143.23	4	1861	12	52010	0.3333	0.000642151	***	0.00309022	**	Ex vs Sa		303	GO:0051453	BP	regulation of intracellular pH	Vc17a253.34, Vc18s349.50, Vc27a234.32, Vc30p330.8, Vc34a122.18, Vc55a7.22, Vc56a11.54, Vc7s374.47, Vc95p0.8	9	7813	12	52010	0.75	5.528e-06	****	6.34169e-05	****	Ex vs Se		303	GO:0051179	BP	localization	Vc14a373.29, Vc18a6.33, Vc21p54.4, Vc26a56.34, Vc29a55.29, Vc2a427.22, Vc307a0.32, Vc30a126.31, Vc33a280.28, Vc51s19.40, Vc712s0.8, Vc7a20.22	12	9109	20	52010	0.6	2.56512e-05	****	0.000329247	***	Se vs Sa		GO:0043289	BP
304	GO:1902645	BP	tertiary alcohol biosynthetic process	Vc18s145.24, Vc1p398.3, Vc5p375.4, Vc7a143.23	4	1861	12	52010	0.3333	0.000642151	***	0.00309022	**	Ex vs Sa		304	GO:0016747	MF	acyltransferase activity, transferring groups other than amino-acyl groups	Novel3539, Novel4416, Vc12a134.24, Vc13a115.23, Vc13s223.19, Vc16a352.18, Vc17p332.40, Vc1s405.36, Vc21p313.5, Vc23a277.24, Vc24a26.32, Vc25a173.26, Vc27s2.28, Vc28a260.29, Vc28a292.38, Vc2a67.14, Vc32a259.17, Vc32a270.27, Vc35a1.21, Vc36s220.48, Vc3a334.17, Vc40s58.15, Vc41a7.18, Vc42a14.30, Vc4p104.3, Vc5a382.33, Vc8a45.30, Vc8s354.40, Vc9p64.0	29	7813	83	52010	0.3494	5.58793e-06	****	6.38936e-05	****	Ex vs Se		304	GO:0006826	BP	iron ion transport	Vc165a2.35, Vc19a37.38, Vc20a37.42, Vc214s0.37, Vc21a376.27, Vc26a364.26, Vc27a14.26, Vc28s319.35, Vc29a347.24, Vc33a4.31, Vc44a229.35, Vc517p0.2	12	9109	20	52010	0.6	2.56512e-05	****	0.000329247	***	Se vs Sa		GO:1902645	BP
305	GO:0006529	BP	asparagine biosynthetic process	Vc22a294.17, Vc43a88.21, Vc43a95.21, Vc47a111.19	4	1861	12	52010	0.3333	0.000642151	***	0.00309022	**	Ex vs Sa		305	GO:0015074	BP	DNA integration	Novel0132, Novel0180, Novel0663, Novel1410, Novel1719, Novel3273, Novel3600, Novel3661, Novel4083, Novel4138, Novel4239, Novel4364, Novel5165, Vc207s1.46, Vc27a35.16, Vc3a407.37	16	7813	33	52010	0.4848	5.90958e-06	****	6.69074e-05	****	Ex vs Se		305	GO:0031984	CC	organelle subcompartment	Vc10a325.24, Vc11a242.24, Vc11a301.19, Vc12a166.24, Vc12a254.22, Vc12a286.31, Vc13a286.23, Vc146a2.57, Vc14a239.15, Vc15a296.30, Vc15a382.31, Vc15s236.53, Vc16a213.28, Vc16a230.18, Vc16p224.8, Vc17s384.23, Vc17s6.46, Vc18a174.24, Vc1a359.30, Vc1s253.39, Vc20p374.4, Vc23a107.30, Vc23a180.38, Vc24a151.23, Vc25a129.24, Vc25p235.8, Vc25p286.3, Vc28a123.37, Vc2a278.22, Vc2s394.48, Vc31a165.23, Vc31a17…	58	9109	197	52010	0.2944	2.60217e-05	****	0.000332907	***	Se vs Sa		GO:0006529	BP
306	GO:0015120	MF	phosphoglycerate transmembrane transporter activity	Vc27a362.29, Vc34a98.23, Vc35s111.31, Vc9s166.18	4	1861	12	52010	0.3333	0.000642151	***	0.00309022	**	Ex vs Sa		306	GO:0004185	MF	serine-type carboxypeptidase activity	Vc119s3.55, Vc14a69.29, Vc16a352.18, Vc18s44.37, Vc19a68.52, Vc20a72.59, Vc22a89.30, Vc22a89.31, Vc28a286.24, Vc2a399.50, Vc31a38.20, Vc31s300.21, Vc37a286.26, Vc38s14.24, Vc45a207.25, Vc6s405.42	16	7813	33	52010	0.4848	5.90958e-06	****	6.69074e-05	****	Ex vs Se		306	GO:0098772	MF	molecular function regulator activity	Vc10a371.21, Vc10a39.34, Vc15a317.37, Vc16a16.38, Vc17s45.39, Vc19a346.40, Vc1a32.25, Vc1a403.30, Vc24a87.25, Vc25s201.31, Vc2s208.24, Vc34a317.24, Vc3s234.20, Vc4a154.31, Vc8s47.43, Vc9a107.37	16	9109	32	52010	0.5	2.66809e-05	****	0.000340225	***	Se vs Sa		GO:0015120	MF
307	GO:0015605	MF	organophosphate ester transmembrane transporter activity	Vc27a362.29, Vc34a98.23, Vc35s111.31, Vc9s166.18	4	1861	12	52010	0.3333	0.000642151	***	0.00309022	**	Ex vs Sa		307	GO:0046686	BP	response to cadmium ion	Vc13a98.30, Vc14a326.41, Vc187a1.54, Vc19s349.40, Vc1a80.26, Vc1a88.20, Vc21p134.1, Vc24p83.21, Vc26a0.15, Vc26p137.7, Vc29p134.6, Vc2p377.39, Vc31s314.37, Vc33a316.14, Vc33a324.17, Vc35p216.5, Vc3a32.22, Vc847a0.8	18	7813	40	52010	0.45	5.9285e-06	****	6.69074e-05	****	Ex vs Se		307	GO:0098827	CC	endoplasmic reticulum subcompartment	Vc10s177.20, Vc11p20.10, Vc12s17.27, Vc13a252.24, Vc17s1.16, Vc1s256.32, Vc21a9.22, Vc21p224.11, Vc22a8.25, Vc22s227.27, Vc24a56.29, Vc26a6.33, Vc26s221.41, Vc27p357.7, Vc29a3.26, Vc29s213.42, Vc30a150.47, Vc32a142.28, Vc33a131.36, Vc33a312.21, Vc34a291.26, Vc34a301.12, Vc42s127.24, Vc44a227.23, Vc46s118.33, Vc47s37.22, Vc6a412.16, Vc85s1.21	28	9109	74	52010	0.3784	2.68897e-05	****	0.000341771	***	Se vs Sa		GO:0015605	MF
308	GO:0015713	BP	phosphoglycerate transmembrane transport	Vc27a362.29, Vc34a98.23, Vc35s111.31, Vc9s166.18	4	1861	12	52010	0.3333	0.000642151	***	0.00309022	**	Ex vs Sa		308	GO:0006730	BP	one-carbon metabolic process	Vc1426a0.2, Vc14a374.18, Vc17p161.0, Vc21a232.14, Vc26p228.2, Vc26s141.22, Vc27a261.29, Vc27p120.9, Vc29a219.23, Vc2a427.24, Vc33a198.33, Vc33p124.6, Vc34a85.25, Vc34p190.4, Vc36a226.31, Vc45p125.7, Vc4a122.37, Vc9a78.36	18	7813	40	52010	0.45	5.9285e-06	****	6.69074e-05	****	Ex vs Se		308	GO:0070469	CC	respirasome	Vc10p177.14, Vc124a3.48, Vc12s114.36, Vc13p47.9, Vc14a22.24, Vc17a140.19, Vc18a264.27, Vc19a2.41, Vc1a46.35, Vc25a28.27, Vc25p111.10, Vc2a233.19, Vc2p121.1, Vc31a54.20, Vc32s99.37, Vc36s203.32, Vc37p181.1, Vc38a127.28, Vc39a134.10, Vc3p407.12, Vc5p177.10, Vc6a295.37, Vc7a292.22, Vc8p190.21, Vc8s371.48	25	9109	63	52010	0.3968	2.79296e-05	****	0.000353228	***	Se vs Sa		GO:0015713	BP
309	GO:0010189	BP	vitamin E biosynthetic process	Vc35s263.41, Vc36a83.20, Vc8a35.40, Vc9p333.2	4	1861	12	52010	0.3333	0.000642151	***	0.00309022	**	Ex vs Sa		309	GO:0140825	MF	lactoperoxidase activity	Vc10s232.19, Vc11p309.17, Vc13s302.30, Vc14a323.40, Vc16a42.29, Vc19a269.28, Vc1s176.37, Vc21a112.20, Vc21a112.21, Vc24p92.1, Vc25a316.26, Vc29a112.21, Vc2a320.20, Vc32s76.26, Vc33a226.20, Vc35a117.34, Vc3a84.40, Vc3p36.24, Vc3s84.52, Vc43a78.24, Vc43a90.26, Vc5a165.13, Vc6s228.38, Vc7a201.15, Vc7a382.28, Vc8a248.21, Vc9a171.28	27	7813	75	52010	0.36	6.12303e-06	****	6.88791e-05	****	Ex vs Se		309	GO:0016471	CC	vacuolar proton-transporting V-type ATPase complex	Vc10a226.28, Vc17a313.23, Vc27a278.21, Vc34s66.31, Vc36p168.7, Vc4a286.34, Vc50a11.21, Vc9a251.18	8	9109	10	52010	0.8	2.83462e-05	****	0.000353228	***	Se vs Sa		GO:0010189	BP
310	GO:0008324	MF	monoatomic cation transmembrane transporter activity	Vc10a342.30, Vc11p18.0, Vc11p91.5, Vc15a30.29, Vc15p95.6, Vc24p307.5, Vc44a229.35	7	1861	42	52010	0.1667	0.000667656	***	0.0031923	**	Ex vs Sa		310	GO:0019773	CC	proteasome core complex, alpha-subunit complex	Vc1176p0.0, Vc11p224.2, Vc12s67.58, Vc13a40.43, Vc21a15.32, Vc22a224.22, Vc24p168.7, Vc27s331.38, Vc29a10.32, Vc30a295.42, Vc33a305.24, Vc35a221.31, Vc36a129.18, Vc43a152.27, Vc4a314.31, Vc9a289.29, Vc9s410.35	17	7813	37	52010	0.4595	7.59645e-06	****	8.51783e-05	****	Ex vs Se		310	GO:0004612	MF	phosphoenolpyruvate carboxykinase (ATP) activity	Vc12a129.12, Vc16a125.32, Vc18a269.27, Vc23a285.8, Vc31a35.31, Vc40p56.9, Vc41a12.13, Vc7a307.23	8	9109	10	52010	0.8	2.83462e-05	****	0.000353228	***	Se vs Sa		GO:0008324	MF
311	GO:0004565	MF	beta-galactosidase activity	Vc126s3.69, Vc14a377.25, Vc21a8.22, Vc29a3.21, Vc2a431.29, Vc33a312.24, Vc42a102.21	7	1861	42	52010	0.1667	0.000667656	***	0.0031923	**	Ex vs Sa		311	GO:0031072	MF	heat shock protein binding	Vc11p330.36, Vc136a1.27, Vc14a307.32, Vc14a325.38, Vc157a2.45, Vc16p293.20, Vc199p0.5, Vc19a348.55, Vc19s348.58, Vc21a152.24, Vc24a84.33, Vc25a357.28, Vc26a155.35, Vc29p153.14, Vc2a360.27, Vc2a376.21, Vc2s150.26, Vc2s376.28, Vc33a185.36, Vc35p40.7, Vc36p269.1, Vc3a47.23, Vc4a397.32, Vc56a3.40, Vc61a2.26, Vc70a6.33, Vc9p376.3	27	7813	76	52010	0.3553	8.14294e-06	****	9.07207e-05	****	Ex vs Se		311	GO:0015276	MF	ligand-gated monoatomic ion channel activity	Vc12a376.30, Vc23a58.37, Vc34s6.46, Vc37a26.30, Vc39a271.23, Vc40a279.35, Vc4a225.20, Vc6a103.22	8	9109	10	52010	0.8	2.83462e-05	****	0.000353228	***	Se vs Sa		GO:0004565	MF
312	GO:0004888	MF	transmembrane signaling receptor activity	Vc15a333.29, Vc17a56.35, Vc17a56.37, Vc17s56.40, Vc17s56.41, Vc29a92.22, Vc37s84.37, Vc38a194.27, Vc6s169.44	9	1861	68	52010	0.1324	0.000694026	***	0.00330774	**	Ex vs Sa		312	GO:0008234	MF	cysteine-type peptidase activity	Vc12a100.16, Vc12a60.43, Vc13a282.24, Vc15s391.62, Vc16a164.21, Vc18a6.28, Vc19a68.53, Vc20a72.60, Vc21s15.41, Vc26p11.28, Vc28a286.23, Vc29s10.40, Vc31a76.17, Vc32a93.23, Vc33a305.26, Vc35a125.30, Vc40a30.26, Vc41p39.24, Vc41p41.22, Vc42a25.34, Vc42p195.3, Vc48a48.25, Vc4s218.31, Vc7a20.26, Vc7a268.16, Vc801p0.0, Vc9a179.16	27	7813	76	52010	0.3553	8.14294e-06	****	9.07207e-05	****	Ex vs Se		312	GO:0015085	MF	calcium ion transmembrane transporter activity	Vc132a2.37, Vc16s68.33, Vc18p328.12, Vc35a3.24, Vc36a242.31, Vc4s102.43, Vc7a356.28, Vc9a61.43	8	9109	10	52010	0.8	2.83462e-05	****	0.000353228	***	Se vs Sa		GO:0004888	MF
313	GO:0016620	MF	oxidoreductase activity, acting on the aldehyde or oxo group of donors, NAD or NADP as acceptor	Vc11p43.4, Vc12a13.29, Vc13a45.43, Vc21s6.48, Vc23a362.41, Vc24a317.26, Vc32a320.33, Vc34a105.33	8	1861	55	52010	0.1455	0.000721136	***	0.00342597	**	Ex vs Sa		313	GO:0010449	BP	root meristem growth	Vc13a19.18, Vc17a101.14, Vc1a220.30, Vc2a172.32, Vc2a81.15, Vc30s275.41, Vc34a295.15, Vc3a330.26, Vc42s41.37, Vc45a12.16	10	7813	15	52010	0.6667	8.41728e-06	****	9.34775e-05	****	Ex vs Se		313	GO:0140352	BP	export from cell	Vc18a348.32, Vc21a322.25, Vc26a314.29, Vc29p262.23, Vc37s99.32, Vc38a182.23, Vc44a194.25, Vc6s187.23	8	9109	10	52010	0.8	2.83462e-05	****	0.000353228	***	Se vs Sa		GO:0016620	MF
314	GO:0016627	MF	oxidoreductase activity, acting on the CH-CH group of donors	Vc21a150.23, Vc29a151.24, Vc33a186.25, Vc45a10.20, Vc5a22.20	5	1861	21	52010	0.2381	0.000734864	***	0.00346902	**	Ex vs Sa		314	GO:0006749	BP	glutathione metabolic process	Novel5402, Vc13a26.16, Vc13p257.8, Vc14a185.29, Vc14s110.19, Vc1743a0.5, Vc17p183.3, Vc17p48.0, Vc24a11.46, Vc25s347.34, Vc27a146.27, Vc2a225.25, Vc2a269.40, Vc30a282.25, Vc34a252.24, Vc36s238.20, Vc3a167.35, Vc3a167.39, Vc3a210.28, Vc44a54.37, Vc44a54.38, Vc4s107.33, Vc72a0.26, Vc94a1.35, Vc9s66.24	25	7813	68	52010	0.3676	8.71633e-06	****	9.49332e-05	****	Ex vs Se		314	GO:0042545	BP	cell wall modification	Novel5165, Vc10a387.31, Vc11a190.18, Vc11a198.29, Vc13a81.25, Vc17s367.32, Vc20a10.35, Vc22a40.44, Vc27s330.33, Vc28a341.26, Vc30a325.29, Vc34a2.28, Vc34a2.29, Vc48a101.27, Vc873a0.8	15	9109	29	52010	0.5172	2.84248e-05	****	0.000353228	***	Se vs Sa		GO:0016627	MF
315	GO:0042128	BP	nitrate assimilation	Vc21a31.19, Vc26a31.27, Vc2a256.27, Vc30a343.52, Vc48a103.40	5	1861	21	52010	0.2381	0.000734864	***	0.00346902	**	Ex vs Sa		315	GO:0004612	MF	phosphoenolpyruvate carboxykinase (ATP) activity	Vc12a129.12, Vc16a125.32, Vc18a269.27, Vc23a285.8, Vc31a35.31, Vc40p56.9, Vc41a12.13, Vc7a307.23	8	7813	10	52010	0.8	8.73954e-06	****	9.49332e-05	****	Ex vs Se		315	GO:0008479	MF	tRNA-guanosine(34) queuine transglycosylase activity	Vc12s241.19, Vc20s239.26, Vc23s259.31, Vc410s0.22, Vc41s62.29, Vc44s119.33	6	9109	6	52010	1	2.88213e-05	****	0.000355888	***	Se vs Sa		GO:0042128	BP
316	GO:0009408	BP	response to heat	Novel1844, Vc10s394.22, Vc15s352.40, Vc17a163.18, Vc17a163.19, Vc18s145.24, Vc19p46.20, Vc19s349.40, Vc1a7.44, Vc2a101.19, Vc2a333.29, Vc30a239.30, Vc34a187.19, Vc38a182.23, Vc3a70.37, Vc45a129.27, Vc5s7.37, Vc7a143.23	18	1861	214	52010	0.0841	0.000750335	***	0.00351971	**	Ex vs Sa		316	GO:0010005	CC	cortical microtubule, transverse to long axis	Vc13a86.15, Vc20a97.25, Vc23a102.20, Vc28a258.27, Vc30a321.22, Vc32a278.27, Vc40a185.19, Vc41a172.22	8	7813	10	52010	0.8	8.73954e-06	****	9.49332e-05	****	Ex vs Se		316	GO:0035269	BP	protein O-linked mannosylation	Vc17a325.31, Vc34a50.31, Vc35a293.11, Vc36a33.18, Vc50a23.32, Vc9s378.37	6	9109	6	52010	1	2.88213e-05	****	0.000355888	***	Se vs Sa		GO:0009408	BP
317	GO:0106310	MF	protein serine kinase activity	Vc103a1.29, Vc10p322.0, Vc133a2.18, Vc1a430.38, Vc1p428.27, Vc1p90.7, Vc1s428.50, Vc22p126.3, Vc24s205.89, Vc28a32.43, Vc35a94.33, Vc44a24.31, Vc5p107.3, Vc6a419.26, Vc8a22.29, Vc8p335.2, Vc8s412.41, Vc9a138.29	18	1861	214	52010	0.0841	0.000750335	***	0.00351971	**	Ex vs Sa		317	GO:0052716	MF	hydroquinone:oxygen oxidoreductase activity	Vc14a278.15, Vc17s19.29, Vc25a320.43, Vc38s2.56, Vc3s80.25, Vc4a241.17, Vc4a242.31, Vc9a152.13	8	7813	10	52010	0.8	8.73954e-06	****	9.49332e-05	****	Ex vs Se		317	GO:0140664	MF	ATP-dependent DNA damage sensor activity	Vc10s5.33, Vc11p387.2, Vc13a209.23, Vc17a359.33, Vc1a441.32, Vc21s64.47, Vc22s39.47, Vc26s329.27, Vc26s64.47, Vc29s65.27, Vc30a33.41, Vc32a171.17, Vc33s272.56, Vc33s293.34, Vc35a32.27, Vc36s275.56, Vc42a232.39, Vc4s55.44, Vc69s3.31, Vc87a5.64, Vc8s286.34	21	9109	49	52010	0.4286	3.08805e-05	****	0.000380113	***	Se vs Sa		GO:0106310	MF
318	GO:0019742	BP	pentacyclic triterpenoid metabolic process	Vc10a192.35, Vc1a241.25, Vc40s217.49	3	1861	6	52010	0.5	0.000843359	***	0.00383509	**	Ex vs Sa		318	GO:0047196	MF	long-chain-alcohol O-fatty-acyltransferase activity	Vc14a356.53, Vc14p357.28, Vc14s356.75, Vc266a0.69, Vc266a0.70, Vc38a226.17, Vc38s226.22, Vc6a138.21	8	7813	10	52010	0.8	8.73954e-06	****	9.49332e-05	****	Ex vs Se		318	GO:0003899	MF	DNA-directed 5'-3' RNA polymerase activity	Vc11a354.42, Vc12s353.27, Vc1414p0.1, Vc16a88.14, Vc17s44.41, Vc19a107.19, Vc19a51.39, Vc20a104.15, Vc20a55.40, Vc22s103.35, Vc22s129.19, Vc23a14.27, Vc25a350.25, Vc28a303.40, Vc28s70.33, Vc2s353.28, Vc34s318.28, Vc37a286.20, Vc37s156.37, Vc38s153.30, Vc39s81.47, Vc3a54.28, Vc41a21.19, Vc41s233.34, Vc43s117.31, Vc44s169.40, Vc45s126.21, Vc45s4.35, Vc47s89.37, Vc48s9.42, Vc4a4.30, Vc4s118.33, Vc4s…	39	9109	118	52010	0.3305	3.26968e-05	****	0.000401204	***	Se vs Sa		GO:0019742	BP
319	GO:1900037	BP	regulation of cellular response to hypoxia	Vc10s210.28, Vc1p199.5, Vc8s222.34	3	1861	6	52010	0.5	0.000843359	***	0.00383509	**	Ex vs Sa		319	GO:0140352	BP	export from cell	Vc18a348.32, Vc21a322.25, Vc26a314.29, Vc37s99.32, Vc38a182.23, Vc44a194.25, Vc6s187.23, Vc7a373.31	8	7813	10	52010	0.8	8.73954e-06	****	9.49332e-05	****	Ex vs Se		319	GO:0004839	MF	ubiquitin activating enzyme activity	Vc10a92.18, Vc14a368.22, Vc16a230.19, Vc17a69.35, Vc18a173.29, Vc18s214.21, Vc20a345.28, Vc22a18.26, Vc22a95.33, Vc23p91.7, Vc27a15.35, Vc28a30.21, Vc31a171.20, Vc31a24.38, Vc34s303.33, Vc40s194.26, Vc44a21.20, Vc461a0.21, Vc47a113.17, Vc49a35.31, Vc4a10.35, Vc4a31.53, Vc4a4.28, Vc5a209.33, Vc7a173.15, Vc7p316.14, Vc9a4.28	27	9109	71	52010	0.3803	3.34962e-05	****	0.000409725	***	Se vs Sa		GO:1900037	BP
320	GO:0047890	MF	flavanone 4-reductase activity	Vc13p166.8, Vc30a208.37, Vc32p199.0	3	1861	6	52010	0.5	0.000843359	***	0.00383509	**	Ex vs Sa		320	GO:0010588	BP	cotyledon vascular tissue pattern formation	Vc1a359.30, Vc27p357.7, Vc338a0.23, Vc54a12.26, Vc57a6.30, Vc57a7.37, Vc5a338.32, Vc8a98.20	8	7813	10	52010	0.8	8.73954e-06	****	9.49332e-05	****	Ex vs Se		320	GO:0000987	MF	cis-regulatory region sequence-specific DNA binding	Novel4493, Vc102a1.33, Vc13a102.20, Vc13a88.12, Vc14a201.25, Vc15s21.24, Vc28a145.15, Vc2a240.26, Vc30a319.18, Vc30s274.40, Vc32a276.19, Vc37p88.0, Vc38a193.22, Vc39a214.16, Vc3a198.30, Vc44a153.36, Vc44s239.19, Vc9a224.37	18	9109	39	52010	0.4615	3.38059e-05	****	0.000410013	***	Se vs Sa		GO:0047890	MF
321	GO:0045487	BP	gibberellin catabolic process	Vc1a398.30, Vc5a375.25, Vc8a52.29	3	1861	6	52010	0.5	0.000843359	***	0.00383509	**	Ex vs Sa		321	GO:0016757	MF	glycosyltransferase activity	Novel0796, Novel4185, Novel4561, Vc100a0.27, Vc10a161.18, Vc10a259.20, Vc11a237.31, Vc14a287.24, Vc153p2.10, Vc15s232.44, Vc16a224.31, Vc16a350.21, Vc16a381.41, Vc16p154.8, Vc17a163.18, Vc17a163.19, Vc17a17.16, Vc17a364.31, Vc17s352.51, Vc18a15.26, Vc18a264.30, Vc18a46.32, Vc18p188.4, Vc18s180.20, Vc19a78.32, Vc19s110.25, Vc20p107.2, Vc21a203.25, Vc21a294.30, Vc21a76.22, Vc21s175.40, Vc21s242.39,…	95	7813	411	52010	0.2311	9.00796e-06	****	9.75441e-05	****	Ex vs Se		321	GO:0042555	CC	MCM complex	Vc13s282.38, Vc30a116.24, Vc32a94.24, Vc39s26.36, Vc42s195.27, Vc4p106.15, Vc9a65.40	7	9109	8	52010	0.875	3.41788e-05	****	0.000410013	***	Se vs Sa		GO:0045487	BP
322	GO:0015205	MF	nucleobase transmembrane transporter activity	Vc26a111.38, Vc29a111.27, Vc33a227.33	3	1861	6	52010	0.5	0.000843359	***	0.00383509	**	Ex vs Sa		322	GO:0008202	BP	steroid metabolic process	Vc17a308.25, Vc17a308.26, Vc17a308.27, Vc23s303.41, Vc27a274.27, Vc27a274.28, Vc34a71.32, Vc34s71.38, Vc50a6.31, Vc50a6.32, Vc50p7.9	11	7813	18	52010	0.6111	9.90898e-06	****	0.000106637	***	Ex vs Se		322	GO:0052793	MF	pectin acetylesterase activity	Vc16a218.19, Vc18a187.21, Vc27a117.22, Vc31s155.33, Vc34a194.19, Vc3s61.30, Vc7a199.23	7	9109	8	52010	0.875	3.41788e-05	****	0.000410013	***	Se vs Sa		GO:0015205	MF
323	GO:0015853	BP	adenine transport	Vc26a111.38, Vc29a111.27, Vc33a227.33	3	1861	6	52010	0.5	0.000843359	***	0.00383509	**	Ex vs Sa		323	GO:0010167	BP	response to nitrate	Vc23s281.22, Vc23s283.13, Vc34a90.34, Vc35a54.42, Vc35s271.49, Vc36a216.26, Vc36s54.58, Vc41a232.27, Vc4a375.36, Vc9a354.23, Vc9a90.20	11	7813	18	52010	0.6111	9.90898e-06	****	0.000106637	***	Ex vs Se		323	GO:0044209	BP	AMP salvage	Vc10a221.32, Vc1a187.27, Vc23s300.23, Vc257a0.36, Vc27a54.31, Vc28s83.32, Vc34a300.22, Vc44s78.35, Vc5s235.35, Vc8a234.21	10	9109	15	52010	0.6667	3.42553e-05	****	0.000410013	***	Se vs Sa		GO:0015853	BP
324	GO:0015854	BP	guanine transport	Vc26a111.38, Vc29a111.27, Vc33a227.33	3	1861	6	52010	0.5	0.000843359	***	0.00383509	**	Ex vs Sa		324	GO:0003680	MF	minor groove of adenine-thymine-rich DNA binding	Vc10p299.1, Vc12a32.39, Vc12p136.0, Vc16p340.2, Vc18p56.9, Vc19a24.35, Vc19p49.19, Vc1p105.10, Vc20a24.36, Vc20p49.1, Vc28p304.6, Vc28s331.48, Vc31p288.8, Vc35p26.0, Vc36p282.1, Vc40p60.5, Vc41p5.7, Vc48s91.43, Vc7p67.5	19	7813	45	52010	0.4222	1.02962e-05	****	0.000110462	***	Ex vs Se		324	GO:0004020	MF	adenylylsulfate kinase activity	Vc12a26.21, Vc12a55.21, Vc12a55.22, Vc1380s0.4, Vc13a114.33, Vc32s260.27, Vc32s269.41, Vc35a32.30, Vc36a275.38, Vc4a55.33	10	9109	15	52010	0.6667	3.42553e-05	****	0.000410013	***	Se vs Sa		GO:0015854	BP
325	GO:0033214	BP	siderophore-dependent iron import into cell	Vc26a31.32, Vc29a28.29, Vc33a287.37	3	1861	6	52010	0.5	0.000843359	***	0.00383509	**	Ex vs Sa		325	GO:0005788	CC	endoplasmic reticulum lumen	Vc11p330.36, Vc14a307.32, Vc174a1.33, Vc17p169.6, Vc19a348.55, Vc21a152.24, Vc21s175.40, Vc24a84.33, Vc25a357.28, Vc26a155.35, Vc26a49.34, Vc29a48.43, Vc29p153.14, Vc29s169.31, Vc2a360.27, Vc2s150.26, Vc33a185.36, Vc33s172.23, Vc34s275.45, Vc37a173.13, Vc38a135.12, Vc39a141.17, Vc3a300.21, Vc3a47.23, Vc45p51.10, Vc4p425.20, Vc9s391.46	27	7813	77	52010	0.3506	1.07529e-05	****	0.000115006	***	Ex vs Se		325	GO:0034765	BP	regulation of monoatomic ion transmembrane transport	Vc12a356.29, Vc13a156.17, Vc13s24.21, Vc30a215.43, Vc30s280.35, Vc32a207.22, Vc41p221.7, Vc41s238.50, Vc42a88.17, Vc42s37.34	10	9109	15	52010	0.6667	3.42553e-05	****	0.000410013	***	Se vs Sa		GO:0033214	BP
326	GO:0051980	MF	iron-nicotianamine transmembrane transporter activity	Vc26a31.32, Vc29a28.29, Vc33a287.37	3	1861	6	52010	0.5	0.000843359	***	0.00383509	**	Ex vs Sa		326	GO:0006094	BP	gluconeogenesis	Vc10a208.28, Vc12a129.12, Vc14a382.32, Vc16a125.32, Vc17a3.20, Vc18a269.27, Vc1a201.20, Vc23a285.8, Vc26a153.15, Vc27a2.18, Vc29a151.22, Vc2a436.36, Vc303a0.49, Vc31a35.31, Vc33a127.25, Vc33a187.26, Vc40p56.9, Vc41a12.13, Vc7a307.23, Vc8a220.27	20	7813	49	52010	0.4082	1.12003e-05	****	0.000119059	***	Ex vs Se		326	GO:0010449	BP	root meristem growth	Vc13a19.18, Vc17a101.14, Vc1a220.30, Vc22a192.22, Vc2a81.15, Vc30s275.41, Vc34a295.15, Vc3a330.26, Vc42s41.37, Vc45a12.16	10	9109	15	52010	0.6667	3.42553e-05	****	0.000410013	***	Se vs Sa		GO:0051980	MF
327	GO:0048657	BP	anther wall tapetum cell differentiation	Vc26s130.36, Vc29s127.41, Vc33s210.34	3	1861	6	52010	0.5	0.000843359	***	0.00383509	**	Ex vs Sa		327	GO:0008610	BP	lipid biosynthetic process	Vc13a286.23, Vc16a105.25, Vc17a308.25, Vc17a308.26, Vc17a308.27, Vc18s292.31, Vc22a60.28, Vc22p59.6, Vc27a274.27, Vc27a274.28, Vc30a113.21, Vc30s115.57, Vc32a98.23, Vc34a71.32, Vc34s71.38, Vc37a293.17, Vc42a199.39, Vc50a6.31, Vc50p7.9, Vc6a412.16	20	7813	49	52010	0.4082	1.12003e-05	****	0.000119059	***	Ex vs Se		327	GO:0008168	MF	methyltransferase activity	Novel3475, Novel4100, Vc1144s0.6, Vc114a0.28, Vc11a205.22, Vc11a382.34, Vc11a5.14, Vc13p257.8, Vc14a148.27, Vc14a192.34, Vc14a239.15, Vc14a75.33, Vc14a79.29, Vc14s384.49, Vc15a17.25, Vc15a199.24, Vc15p117.19, Vc17a128.25, Vc17a173.21, Vc18a73.27, Vc18s21.32, Vc19a358.28, Vc19a51.39, Vc19s281.29, Vc19s38.40, Vc1s371.24, Vc20a0.22, Vc20a55.40, Vc20s10.38, Vc21a123.22, Vc21a317.34, Vc22a352.23, Vc22…	104	9109	409	52010	0.2543	3.53596e-05	****	0.000421937	***	Se vs Sa		GO:0048657	BP
328	GO:0090376	BP	seed trichome differentiation	Novel0179, Vc1s251.29, Vc8a196.32, Vc8a196.33	4	1861	13	52010	0.3077	0.000901317	***	0.00403692	**	Ex vs Sa		328	GO:0048657	BP	anther wall tapetum cell differentiation	Vc13p7.3, Vc26s130.36, Vc29s127.41, Vc30p263.5, Vc33s210.34, Vc42p54.0	6	7813	6	52010	1	1.1473e-05	****	0.000120484	***	Ex vs Se		328	GO:0016874	MF	ligase activity	Novel4776, Vc1022s0.5, Vc10a89.20, Vc11a306.34, Vc11a32.30, Vc11a5.14, Vc11s324.40, Vc11s331.44, Vc11s382.44, Vc12a346.39, Vc12p375.8, Vc12s78.54, Vc132a1.37, Vc14a172.30, Vc14a232.37, Vc14a289.25, Vc14a95.25, Vc153p2.10, Vc1541a0.2, Vc1566a0.2, Vc15a17.25, Vc15a321.35, Vc15a40.12, Vc15s311.42, Vc15s356.46, Vc15s367.40, Vc15s75.27, Vc17a109.15, Vc17a253.36, Vc17a292.22, Vc17s235.27, Vc18a13.44, V…	165	9109	704	52010	0.2344	3.61476e-05	****	0.000430024	***	Se vs Sa		GO:0090376	BP
329	GO:0043603	BP	amide metabolic process	Vc10a119.40, Vc1a311.33, Vc5a290.27, Vc8a140.37	4	1861	13	52010	0.3077	0.000901317	***	0.00403692	**	Ex vs Sa		329	GO:0070524	MF	11-beta-hydroxysteroid dehydrogenase (NADP+) activity	Vc17a308.25, Vc27a274.27, Vc34a71.32, Vc50a6.31, Vc50a6.32, Vc50p7.2	6	7813	6	52010	1	1.1473e-05	****	0.000120484	***	Ex vs Se		329	GO:0099402	BP	plant organ development	Vc10a255.15, Vc13a111.16, Vc16a350.21, Vc18a46.32, Vc18s75.37, Vc20a374.28, Vc22s192.24, Vc29a312.19, Vc2a333.34, Vc31a298.23, Vc32a263.25, Vc32a266.19, Vc3s39.47, Vc41a22.14, Vc43a63.49, Vc46a160.25, Vc47a137.36, Vc49a6.28, Vc5a142.41, Vc7a57.24	20	9109	46	52010	0.4348	3.6881e-05	****	0.000437416	***	Se vs Sa		GO:0043603	BP
330	GO:0043649	BP	dicarboxylic acid catabolic process	Vc10a119.40, Vc1a311.33, Vc5a290.27, Vc8a140.37	4	1861	13	52010	0.3077	0.000901317	***	0.00403692	**	Ex vs Sa		330	GO:0102196	MF	cortisol dehydrogenase activity	Vc17a308.25, Vc27a274.27, Vc34a71.32, Vc50a6.31, Vc50a6.32, Vc50p7.2	6	7813	6	52010	1	1.1473e-05	****	0.000120484	***	Ex vs Se		330	GO:0051259	BP	protein complex oligomerization	Vc15p329.2, Vc17a341.47, Vc19p357.13, Vc19s349.40, Vc21p134.1, Vc24p83.21, Vc26p137.7, Vc27a304.48, Vc27a333.41, Vc29p134.6, Vc29p135.3, Vc46p142.0, Vc46p142.14, Vc46p142.5, Vc46p142.6, Vc46s142.36, Vc47p106.18	17	9109	36	52010	0.4722	3.86212e-05	****	0.000456666	***	Se vs Sa		GO:0043649	BP
331	GO:0051258	BP	protein polymerization	Vc10s265.34, Vc11a326.29, Vc5s132.30, Vc8s287.21	4	1861	13	52010	0.3077	0.000901317	***	0.00403692	**	Ex vs Sa		331	GO:0005253	MF	monoatomic anion channel activity	Vc19a126.27, Vc20s123.32, Vc26s22.45, Vc28s223.24, Vc29s20.42, Vc33a295.32	6	7813	6	52010	1	1.1473e-05	****	0.000120484	***	Ex vs Se		331	GO:0016114	BP	terpenoid biosynthetic process	Novel4995, Vc10a113.26, Vc10a113.31, Vc13p70.4, Vc13p8.4, Vc14a326.39, Vc16a366.33, Vc1s317.29, Vc1s46.41, Vc211a0.22, Vc22a301.32, Vc25s105.21, Vc26p234.1, Vc28a290.34, Vc28p309.2, Vc29p50.1, Vc30p264.5, Vc37p212.7, Vc41a34.48, Vc41a59.21, Vc43a75.21, Vc46p82.24, Vc46p94.5, Vc47p76.22, Vc55a10.22, Vc56p7.13, Vc5a268.35, Vc5a295.31, Vc5a295.34, Vc5a297.44, Vc5p40.16, Vc5s297.56, Vc61a7.13, Vc70s2…	37	9109	111	52010	0.3333	4.17597e-05	****	0.000492285	***	Se vs Sa		GO:0051258	BP
332	GO:0009687	BP	abscisic acid metabolic process	Vc18s145.24, Vc1p398.3, Vc5p375.4, Vc7a143.23	4	1861	13	52010	0.3077	0.000901317	***	0.00403692	**	Ex vs Sa		332	GO:0015078	MF	proton transmembrane transporter activity	Novel4776, Vc11a167.32, Vc11s112.24, Vc14a186.29, Vc15a107.18, Vc19a235.34, Vc19a337.40, Vc1a69.26, Vc24s95.40, Vc28a83.26, Vc29a1.32, Vc33a327.68, Vc3s209.28, Vc44a78.27, Vc44a78.28, Vc5a56.26, Vc8a353.26	17	7813	38	52010	0.4474	1.18218e-05	****	0.000120944	***	Ex vs Se		332	GO:0016018	MF	cyclosporin A binding	Vc11p324.1, Vc13a131.20, Vc16s182.34, Vc19a363.26, Vc21s126.49, Vc24a70.29, Vc26a129.38, Vc29a127.24, Vc30s233.32, Vc32p106.5, Vc32s238.26, Vc33a210.31, Vc43p29.9, Vc47s170.30, Vc47s195.45, Vc7s251.25	16	9109	33	52010	0.4848	4.33734e-05	****	0.000509768	***	Se vs Sa		GO:0009687	BP
333	GO:0010224	BP	response to UV-B	Novel4416, Vc13a46.32, Vc26s130.36, Vc29s127.41, Vc30a303.29, Vc32a318.21, Vc33s210.34, Vc42a14.30	8	1861	57	52010	0.1404	0.000918942	***	0.0041035	**	Ex vs Sa		333	GO:0030599	MF	pectinesterase activity	Novel5165, Vc10a387.31, Vc11a190.18, Vc11a198.29, Vc13a81.25, Vc17s367.32, Vc20a10.35, Vc22a40.44, Vc27s330.33, Vc28p187.1, Vc30a325.29, Vc34a2.28, Vc34a2.29, Vc44p186.0, Vc48a101.27, Vc71p4.8, Vc873a0.8	17	7813	38	52010	0.4474	1.18218e-05	****	0.000120944	***	Ex vs Se		333	GO:0004568	MF	chitinase activity	Vc12a10.30, Vc12p382.8, Vc13a314.25, Vc23p16.11, Vc23p16.4, Vc23p17.1, Vc23p52.20, Vc23s17.40, Vc30s82.54, Vc32s66.30, Vc35a54.42, Vc36a216.26, Vc41a264.29, Vc41p264.23, Vc42a213.43, Vc53a15.50, Vc53a15.52, Vc53p15.32, Vc9a90.20	19	9109	43	52010	0.4419	4.37377e-05	****	0.000512506	***	Se vs Sa		GO:0010224	BP
334	GO:0009523	CC	photosystem II	Vc10a262.17, Vc17a80.31, Vc2p214.1, Vc34a269.38, Vc38p251.0, Vc5a402.29, Vc7s154.18, Vc8a28.24, Vc9p405.15	9	1861	71	52010	0.1268	0.000953291	***	0.00424414	**	Ex vs Sa		334	GO:0009646	BP	response to absence of light	Vc10a375.26, Vc1139p0.1, Vc12a15.23, Vc12a31.26, Vc13a98.30, Vc14a236.21, Vc16a95.34, Vc18s75.37, Vc20a121.20, Vc23p364.3, Vc28a226.19, Vc2a281.20, Vc31a338.28, Vc3a158.19, Vc847a0.8	15	7813	31	52010	0.4839	1.1934e-05	****	0.000120944	***	Ex vs Se		334	GO:0048868	BP	pollen tube development	Vc10a229.25, Vc11a242.24, Vc14a256.29, Vc14a283.32, Vc15s236.53, Vc16a350.21, Vc18a46.32, Vc1p179.5, Vc24a151.23, Vc25a326.33, Vc2a302.39, Vc2a329.32, Vc31a298.23, Vc3a111.29, Vc3p75.0, Vc41a22.14, Vc43a63.49, Vc46a160.25, Vc47a137.36, Vc7a57.24, Vc8p245.8	21	9109	50	52010	0.42	4.44837e-05	****	0.00051727	***	Se vs Sa		GO:0009523	CC
335	GO:0004185	MF	serine-type carboxypeptidase activity	Vc16a352.18, Vc18s44.37, Vc22a89.30, Vc22a89.31, Vc24a107.17, Vc31s300.21	6	1861	33	52010	0.1818	0.00100479	**	0.00446008	**	Ex vs Sa		335	GO:0097708	CC	intracellular vesicle	Vc12a286.31, Vc14a239.15, Vc16s34.52, Vc19a127.27, Vc1a80.26, Vc20s125.28, Vc23a107.30, Vc25p235.8, Vc28a222.20, Vc2a278.22, Vc2s198.32, Vc3a161.20, Vc41a168.32, Vc43a169.18, Vc7a391.27	15	7813	31	52010	0.4839	1.1934e-05	****	0.000120944	***	Ex vs Se		335	GO:0004650	MF	polygalacturonase activity	Vc14a350.33, Vc16s51.45, Vc17a343.51, Vc18a349.39, Vc22p82.4, Vc25s270.32, Vc26a347.28, Vc27a306.43, Vc29a335.43, Vc2a404.33, Vc2s259.35, Vc33a18.30, Vc34a39.33, Vc37a181.25, Vc38a127.30, Vc39a133.33, Vc43a258.27, Vc454s0.28, Vc46a202.32, Vc645p0.4, Vc6s295.42	21	9109	50	52010	0.42	4.44837e-05	****	0.00051727	***	Se vs Sa		GO:0004185	MF
336	GO:0044248	BP	cellular catabolic process	Novel5402, Vc1743a0.5, Vc1a116.49, Vc2a270.34, Vc2p269.6, Vc34a252.24, Vc3a167.39, Vc94a1.35	8	1861	58	52010	0.1379	0.00103295	**	0.00456444	**	Ex vs Sa		336	GO:0010023	BP	proanthocyanidin biosynthetic process	Novel2248, Vc11s112.24, Vc14a186.29, Vc15a107.18, Vc22a131.24, Vc3s209.28, Vc46a11.23	7	7813	8	52010	0.875	1.19691e-05	****	0.000120944	***	Ex vs Se		336	GO:0010167	BP	response to nitrate	Vc23s281.22, Vc23s283.13, Vc34a90.34, Vc35a54.42, Vc35s271.49, Vc36a216.26, Vc36s54.58, Vc41a232.27, Vc4a375.36, Vc9a354.23, Vc9a90.20	11	9109	18	52010	0.6111	4.45419e-05	****	0.00051727	***	Se vs Sa		GO:0044248	BP
337	GO:0016616	MF	oxidoreductase activity, acting on the CH-OH group of donors, NAD or NADP as acceptor	Vc1102p0.1, Vc149s2.68, Vc17s293.34, Vc18s145.24, Vc22a38.50, Vc23s145.18, Vc28a160.23, Vc34a25.19, Vc36a33.15, Vc38a282.38, Vc39a61.32, Vc44a161.25, Vc526p0.3, Vc7a143.23, Vc8s149.28	15	1861	167	52010	0.0898	0.00103444	**	0.00456444	**	Ex vs Sa		337	GO:0016134	BP	saponin metabolic process	Vc10a192.35, Vc1a241.25, Vc21p238.1, Vc26p234.1, Vc29p226.18, Vc5a190.17, Vc8a205.30	7	7813	8	52010	0.875	1.19691e-05	****	0.000120944	***	Ex vs Se		337	GO:0008234	MF	cysteine-type peptidase activity	Vc12a100.16, Vc12a60.43, Vc13a282.24, Vc15s391.62, Vc16a164.21, Vc18a6.28, Vc19a68.53, Vc20a72.60, Vc21s15.41, Vc26p11.28, Vc28a286.23, Vc29s10.40, Vc30a292.19, Vc31a76.17, Vc32a93.23, Vc33a305.26, Vc35a125.30, Vc40a30.26, Vc41p39.24, Vc41p41.22, Vc42a25.34, Vc42p195.3, Vc48a48.25, Vc4s218.31, Vc7a20.26, Vc7a268.16, Vc801p0.0, Vc9a179.16	28	9109	76	52010	0.3684	4.72335e-05	****	0.000545712	***	Se vs Sa		GO:0016616	MF
338	GO:0009733	BP	response to auxin	Novel4416, Vc11a245.18, Vc13a46.32, Vc21a309.26, Vc22p41.8, Vc30a303.29, Vc30p110.5, Vc32a318.21, Vc32s101.58, Vc36a83.18, Vc42a14.30, Vc4a358.29, Vc583a0.14, Vc9a334.16	14	1861	151	52010	0.0927	0.00110442	**	0.0048588	**	Ex vs Sa		338	GO:0010117	BP	photoprotection	Vc11a290.20, Vc18s75.37, Vc19a322.30, Vc24s110.31, Vc35a10.39, Vc4a85.33, Vc889p0.2	7	7813	8	52010	0.875	1.19691e-05	****	0.000120944	***	Ex vs Se		338	GO:0106310	MF	protein serine kinase activity	Vc10a334.32, Vc10p322.0, Vc10s107.31, Vc10s399.42, Vc10s48.32, Vc11a315.22, Vc12a295.21, Vc12a37.30, Vc136p3.2, Vc13p7.3, Vc13s15.44, Vc15a302.29, Vc17a327.28, Vc17a334.31, Vc17p9.0, Vc17s83.33, Vc19a371.25, Vc1s1.32, Vc1s326.44, Vc1s77.31, Vc23s281.22, Vc23s283.13, Vc23s309.41, Vc24a311.20, Vc24a61.37, Vc24p196.2, Vc25a307.30, Vc25a310.42, Vc27a293.23, Vc27p7.2, Vc28a68.22, Vc2a313.27, Vc2a334.3…	61	9109	214	52010	0.285	4.72708e-05	****	0.000545712	***	Se vs Sa		GO:0009733	BP
339	GO:0016132	BP	brassinosteroid biosynthetic process	Vc26s130.36, Vc29s127.41, Vc33s210.34, Vc35p310.18, Vc7a342.29	5	1861	23	52010	0.2174	0.00114501	**	0.00502249	**	Ex vs Sa		339	GO:0047655	MF	allyl-alcohol dehydrogenase activity	Vc12s139.44, Vc20a95.13, Vc2s160.42, Vc3s306.41, Vc40a63.31, Vc40a63.32, Vc41s3.38	7	7813	8	52010	0.875	1.19691e-05	****	0.000120944	***	Ex vs Se		339	GO:0006885	BP	regulation of pH	Vc11a318.29, Vc138a0.21, Vc16a256.16, Vc18a146.17, Vc1a44.30, Vc31a202.21, Vc31a211.16, Vc4a37.37, Vc5a43.25, Vc6s35.30, Vc7s187.31, Vc80a3.29, Vc8a372.32, Vc93a5.51, Vc9a12.33	15	9109	30	52010	0.5	4.76406e-05	****	0.000548358	***	Se vs Sa		GO:0016132	BP
340	GO:0071495	BP	cellular response to endogenous stimulus	Novel5402, Vc1743a0.5, Vc1a116.49, Vc2a269.40	4	1861	14	52010	0.2857	0.0012262	**	0.0053471	**	Ex vs Sa		340	GO:0016405	MF	CoA-ligase activity	Vc12s7.48, Vc17a300.24, Vc22a254.31, Vc34a78.26, Vc43a132.31, Vc46a86.22, Vc47a69.25	7	7813	8	52010	0.875	1.19691e-05	****	0.000120944	***	Ex vs Se		340	GO:0006120	BP	mitochondrial electron transport, NADH to ubiquinone	Vc11a371.32, Vc11p349.6, Vc15a364.32, Vc19a374.29, Vc1a46.35, Vc24a31.39, Vc24p52.7, Vc29s17.63, Vc2s425.36, Vc33s297.35, Vc48a108.36, Vc8s371.48	12	9109	21	52010	0.5714	5.0282e-05	****	0.000575368	***	Se vs Sa		GO:0071495	BP
341	GO:0032787	BP	monocarboxylic acid metabolic process	Vc14s19.34, Vc25s25.33, Vc37s189.25, Vc3a410.20	4	1861	14	52010	0.2857	0.0012262	**	0.0053471	**	Ex vs Sa		341	GO:0050563	MF	trans-feruloyl-CoA synthase activity	Vc160a2.34, Vc17p323.0, Vc27p288.0, Vc34p57.9, Vc38s101.15, Vc50p21.6, Vc6a422.25	7	7813	8	52010	0.875	1.19691e-05	****	0.000120944	***	Ex vs Se		341	GO:0005351	MF	carbohydrate:proton symporter activity	Vc12s128.53, Vc13s269.25, Vc23s287.27, Vc30a132.30, Vc37a105.23, Vc38s175.32, Vc40a55.29, Vc41s14.32, Vc42a181.27, Vc42s182.32, Vc613p0.1, Vc6p193.11	12	9109	21	52010	0.5714	5.0282e-05	****	0.000575368	***	Se vs Sa		GO:0032787	BP
342	GO:0043531	MF	ADP binding	Vc16p172.0, Vc16s74.45, Vc17s148.29, Vc26a287.15, Vc2a405.43, Vc2p257.0, Vc33s98.25, Vc3p179.2, Vc40a263.28, Vc5s13.27, Vc7a262.25, Vc7s351.40, Vc8a82.38, Vc8s17.27, Vc8s400.32	15	1861	170	52010	0.0882	0.00123834	**	0.00538423	**	Ex vs Sa		342	GO:0106286	MF	(E)-caffeate-CoA ligase activity	Vc160a2.34, Vc17p323.0, Vc27p288.0, Vc34p57.9, Vc38s101.15, Vc50p21.6, Vc6a422.25	7	7813	8	52010	0.875	1.19691e-05	****	0.000120944	***	Ex vs Se		342	GO:0000139	CC	Golgi membrane	Vc10s5.38, Vc11p371.17, Vc1296a0.6, Vc1316s0.8, Vc136a3.21, Vc137a0.18, Vc13a255.17, Vc13s83.33, Vc13s94.34, Vc14s313.40, Vc15a364.29, Vc16a227.28, Vc16a91.22, Vc17a122.31, Vc17a362.30, Vc17s163.22, Vc17s375.31, Vc18a235.12, Vc19a116.30, Vc19p374.13, Vc1s441.33, Vc20p343.1, Vc21a294.30, Vc21s242.39, Vc22a252.26, Vc23a316.42, Vc23a339.27, Vc24a31.44, Vc25s231.31, Vc25s330.52, Vc26s238.33, Vc27a125…	95	9109	370	52010	0.2568	5.05553e-05	****	0.000576804	***	Se vs Sa		GO:0043531	MF
343	GO:0047205	MF	quinate O-hydroxycinnamoyltransferase activity	Novel0961, Vc17p329.4	2	1861	2	52010	1	0.00127966	**	0.00543672	**	Ex vs Sa		343	GO:0102070	MF	18-hydroxyoleate peroxygenase activity	Vc1s138.31, Vc35a10.38, Vc36a252.35, Vc4a85.34, Vc5a126.29, Vc8a283.29, Vc9a49.38	7	7813	8	52010	0.875	1.19691e-05	****	0.000120944	***	Ex vs Se		343	GO:0000302	BP	response to reactive oxygen species	Vc10s232.19, Vc11p309.17, Vc13s302.30, Vc15a294.29, Vc17s319.45, Vc19a36.26, Vc1s176.37, Vc20s36.34, Vc214s1.45, Vc24p92.1, Vc27a284.23, Vc32s76.26, Vc34a61.36, Vc39s195.45, Vc50a17.30, Vc6s228.38, Vc7a201.15, Vc8a248.21	18	9109	40	52010	0.45	5.14219e-05	****	0.00058328	***	Se vs Sa		GO:0047205	MF
344	GO:0004760	MF	serine-pyruvate transaminase activity	Vc11p62.4, Vc19s164.36	2	1861	2	52010	1	0.00127966	**	0.00543672	**	Ex vs Sa		344	GO:1990137	MF	plant seed peroxidase activity	Vc1s138.31, Vc35a10.38, Vc36a252.35, Vc4a85.34, Vc5a126.29, Vc8a283.29, Vc9a49.38	7	7813	8	52010	0.875	1.19691e-05	****	0.000120944	***	Ex vs Se		344	GO:0016762	MF	xyloglucan:xyloglucosyl transferase activity	Vc1584a0.5, Vc20a157.23, Vc22a67.34, Vc26s239.52, Vc28a165.20, Vc31s261.40, Vc33s112.30, Vc35a208.17, Vc35s152.30, Vc36s205.36, Vc37a35.39, Vc38s242.14, Vc4a250.24, Vc52a15.38, Vc6a206.21, Vc6s112.26, Vc6s206.28, Vc8a19.29	18	9109	40	52010	0.45	5.14219e-05	****	0.00058328	***	Se vs Sa		GO:0004760	MF
345	GO:0008453	MF	alanine-glyoxylate transaminase activity	Vc11p62.4, Vc19s164.36	2	1861	2	52010	1	0.00127966	**	0.00543672	**	Ex vs Sa		345	GO:0010224	BP	response to UV-B	Novel4416, Vc13a46.32, Vc13p7.3, Vc17s232.18, Vc19a36.26, Vc20s36.34, Vc214s1.45, Vc26s130.36, Vc29s127.41, Vc30a303.29, Vc30p263.5, Vc31s314.37, Vc32a318.21, Vc33s210.34, Vc34s142.48, Vc35a214.30, Vc42a14.30, Vc42p54.0, Vc43a96.23, Vc45a213.22, Vc47a109.26, Vc4a308.29	22	7813	57	52010	0.386	1.21124e-05	****	0.000122036	***	Ex vs Se		345	GO:0034599	BP	cellular response to oxidative stress	Vc10a336.34, Vc10s232.19, Vc11p309.17, Vc13s302.30, Vc15a294.29, Vc16s17.43, Vc16s34.52, Vc1a74.31, Vc1s176.37, Vc23a139.21, Vc24p92.1, Vc29p233.16, Vc32s76.26, Vc33p109.3, Vc33p43.4, Vc37a300.30, Vc38a9.32, Vc39s195.45, Vc42s19.53, Vc45s133.29, Vc5a61.32, Vc6s228.38, Vc7a201.15, Vc7a391.27, Vc8a248.21	25	9109	65	52010	0.3846	5.1859e-05	****	0.000586533	***	Se vs Sa		GO:0008453	MF
346	GO:0019265	BP	glycine biosynthetic process, by transamination of glyoxylate	Vc11p62.4, Vc19s164.36	2	1861	2	52010	1	0.00127966	**	0.00543672	**	Ex vs Sa		346	GO:0045330	MF	aspartyl esterase activity	Novel5165, Vc10a387.31, Vc11a190.18, Vc11a198.29, Vc13a81.25, Vc17s367.32, Vc20a10.35, Vc22a40.44, Vc27s330.33, Vc30a325.29, Vc34a2.28, Vc34a2.29, Vc48a101.27, Vc873a0.8	14	7813	28	52010	0.5	1.44942e-05	****	0.000145612	***	Ex vs Se		346	GO:0005768	CC	endosome	Vc11s175.31, Vc11s324.40, Vc12a254.22, Vc12p334.8, Vc130a3.45, Vc13p7.3, Vc146a2.57, Vc14a76.19, Vc14a79.31, Vc15a321.40, Vc15s153.24, Vc15s311.42, Vc16a213.28, Vc17a15.27, Vc17a379.33, Vc17p139.3, Vc17s6.46, Vc18s180.20, Vc19s284.51, Vc19s363.30, Vc1s226.31, Vc1s253.39, Vc1s414.43, Vc20p374.4, Vc21s4.26, Vc22s252.35, Vc237a0.44, Vc23a102.24, Vc23a180.38, Vc23a316.42, Vc24a70.32, Vc24s157.32, Vc2…	79	9109	296	52010	0.2669	5.22293e-05	****	0.000589014	***	Se vs Sa		GO:0019265	BP
347	GO:0080180	BP	2-methylguanosine metabolic process	Vc14s322.43, Vc2s372.43	2	1861	2	52010	1	0.00127966	**	0.00543672	**	Ex vs Sa		347	GO:0010597	BP	green leaf volatile biosynthetic process	Novel3913, Vc10a95.34, Vc12a358.27, Vc13s257.23, Vc15a315.33, Vc15a332.31, Vc15a360.46, Vc160a2.34, Vc16a67.37, Vc17a52.12, Vc17a83.25, Vc19a360.19, Vc1s338.32, Vc20a54.31, Vc21a309.26, Vc21s131.29, Vc22a39.37, Vc23a128.29, Vc23p119.12, Vc23p326.0, Vc24a73.38, Vc28a304.28, Vc28a311.40, Vc30a146.39, Vc32a121.31, Vc33a273.23, Vc35a146.23, Vc36a211.31, Vc37a197.27, Vc37a23.28, Vc37a253.25, Vc38s101.…	49	7813	179	52010	0.2737	1.4661e-05	****	0.000146863	***	Ex vs Se		347	GO:0043649	BP	dicarboxylic acid catabolic process	Vc10a119.40, Vc12s360.40, Vc1a311.33, Vc40a264.30, Vc40p258.7, Vc41a242.35, Vc44p159.2, Vc5a290.27, Vc8a140.37	9	9109	13	52010	0.6923	5.57902e-05	****	0.000621981	***	Se vs Sa		GO:0080180	BP
348	GO:0102084	MF	L-dopa O-methyltransferase activity	Vc20a5.31, Vc48a105.37	2	1861	2	52010	1	0.00127966	**	0.00543672	**	Ex vs Sa		348	GO:0009687	BP	abscisic acid metabolic process	Vc11a233.23, Vc15a227.19, Vc16a174.22, Vc18s145.24, Vc1p398.3, Vc24a160.31, Vc24p122.11, Vc5p375.4, Vc7a143.23	9	7813	13	52010	0.6923	1.5551e-05	****	0.000154444	***	Ex vs Se		348	GO:0001678	BP	intracellular glucose homeostasis	Vc13a332.32, Vc187a1.46, Vc23a347.25, Vc26a1.31, Vc30p67.1, Vc32a1.28, Vc33a315.24, Vc33a325.28, Vc42a254.11	9	9109	13	52010	0.6923	5.57902e-05	****	0.000621981	***	Se vs Sa		GO:0102084	MF
349	GO:0102938	MF	orcinol O-methyltransferase activity	Vc20a5.31, Vc48a105.37	2	1861	2	52010	1	0.00127966	**	0.00543672	**	Ex vs Sa		349	GO:0050829	BP	defense response to Gram-negative bacterium	Vc11s175.31, Vc14a76.19, Vc14a79.31, Vc15s153.24, Vc16p128.2, Vc237a0.44, Vc25a61.24, Vc31a38.20, Vc7a304.18	9	7813	13	52010	0.6923	1.5551e-05	****	0.000154444	***	Ex vs Se		349	GO:0005536	MF	glucose binding	Vc13a332.32, Vc187a1.46, Vc23a347.25, Vc26a1.31, Vc30p67.1, Vc32a1.28, Vc33a315.24, Vc33a325.28, Vc42a254.11	9	9109	13	52010	0.6923	5.57902e-05	****	0.000621981	***	Se vs Sa		GO:0102938	MF
350	GO:0052634	MF	C-19 gibberellin 2-beta-dioxygenase activity	Vc5a375.25, Vc8a52.29	2	1861	2	52010	1	0.00127966	**	0.00543672	**	Ex vs Sa		350	GO:0045277	CC	respiratory chain complex IV	Vc12a240.21, Vc18a70.32, Vc23a257.36, Vc28s54.29, Vc31a276.30, Vc40a74.27, Vc41a63.18, Vc44s52.49, Vc7a78.39	9	7813	13	52010	0.6923	1.5551e-05	****	0.000154444	***	Ex vs Se		350	GO:0051156	BP	glucose 6-phosphate metabolic process	Vc13a332.32, Vc187a1.46, Vc23a347.25, Vc26a1.31, Vc30p67.1, Vc32a1.28, Vc33a315.24, Vc33a325.28, Vc42a254.11	9	9109	13	52010	0.6923	5.57902e-05	****	0.000621981	***	Se vs Sa		GO:0052634	MF
351	GO:0009617	BP	response to bacterium	Vc31p335.2, Vc33a118.14, Vc36a83.18, Vc37a154.17, Vc38a153.21, Vc4a358.29, Vc4a410.18, Vc9a334.16	8	1861	60	52010	0.1333	0.00129479	**	0.00548532	**	Ex vs Sa		351	GO:1901575	BP	organic substance catabolic process	Novel4981, Novel5484, Vc12a92.40, Vc12s48.26, Vc148s1.45, Vc149a1.17, Vc1a293.20, Vc20a143.30, Vc25a184.27, Vc25a249.23, Vc27s351.27, Vc28a206.36, Vc29a228.27, Vc34s18.25, Vc35a222.16, Vc38s59.23, Vc39a60.19, Vc39p60.2, Vc3s228.41, Vc7a407.28	20	7813	50	52010	0.4	1.60368e-05	****	0.000158815	***	Ex vs Se		351	GO:0009698	BP	phenylpropanoid metabolic process	Vc11p260.30, Vc11s396.32, Vc12s40.56, Vc1429s0.4, Vc14s140.24, Vc16a391.42, Vc17p323.0, Vc22a254.31, Vc22s254.43, Vc23a357.24, Vc24s137.42, Vc26a61.51, Vc30s301.50, Vc35s249.43, Vc38a282.41, Vc42a16.34, Vc43a132.29, Vc43a132.31, Vc46a86.22, Vc46a86.25, Vc47a69.25, Vc47a69.26, Vc4a5.29, Vc4s31.77, Vc4s342.27, Vc51a3.22, Vc740a0.8, Vc9s317.36	28	9109	77	52010	0.3636	6.18966e-05	****	0.000688093	***	Se vs Sa		GO:0009617	BP
352	GO:0106290	MF	trans-cinnamate-CoA ligase activity	Vc17p323.0, Vc27p288.0, Vc28a349.38, Vc34p57.9, Vc38s101.15, Vc50p21.6, Vc6a422.25	7	1861	47	52010	0.1489	0.00133269	**	0.00562988	**	Ex vs Sa		352	GO:0034219	BP	carbohydrate transmembrane transport	Vc11a167.32, Vc13a268.27, Vc14a163.42, Vc18s102.19, Vc18s102.25, Vc19a235.34, Vc25a199.22, Vc2a210.31, Vc30a132.30, Vc31s209.23, Vc31s210.37, Vc32a81.39, Vc3a232.27, Vc42a181.27, Vc42a182.30, Vc42s182.32, Vc43s263.34, Vc47a180.36, Vc7a100.29, Vc7s188.32, Vc7s188.35	21	7813	54	52010	0.3889	1.65803e-05	****	0.000163635	***	Ex vs Se		352	GO:0035672	BP	oligopeptide transmembrane transport	Vc120a3.48, Vc1295a0.3, Vc145a0.34, Vc20a373.32, Vc23a48.43, Vc24a176.42, Vc28a3.33, Vc30a295.37, Vc32s325.55, Vc35s74.41, Vc40a268.30, Vc742a0.11, Vc742a0.12, Vc7a411.26, Vc86a5.56, Vc86s4.45	16	9109	34	52010	0.4706	6.86227e-05	****	0.000760698	***	Se vs Sa		GO:0106290	MF
353	GO:0016702	MF	oxidoreductase activity, acting on single donors with incorporation of molecular oxygen, incorporation of two atoms of oxygen	Vc10p43.7, Vc1p398.3, Vc35a318.30, Vc4a410.18, Vc5p375.4, Vc9a407.29	6	1861	35	52010	0.1714	0.00138554	**	0.00580365	**	Ex vs Sa		353	GO:0000272	BP	polysaccharide catabolic process	Vc138a1.48, Vc14a111.26, Vc14a112.30, Vc14a114.28, Vc16a93.25, Vc18a303.45, Vc23s17.40, Vc25a147.12, Vc25p330.6, Vc29s190.23, Vc2a2.29, Vc2p333.1, Vc31a4.23, Vc33s153.23, Vc3a324.33, Vc3p70.9, Vc4a19.31, Vc4a36.35, Vc4p37.17, Vc583a0.14, Vc7a332.36, Vc7s388.39, Vc9a11.34	23	7813	62	52010	0.371	1.66178e-05	****	0.000163635	***	Ex vs Se		353	GO:0016757	MF	glycosyltransferase activity	Novel4561, Vc100a0.27, Vc10a259.20, Vc11a237.31, Vc11a245.18, Vc11p339.11, Vc13a255.17, Vc153p2.10, Vc15s232.44, Vc16a224.31, Vc16a350.21, Vc16a381.41, Vc16a391.42, Vc17a17.16, Vc17a339.35, Vc17a364.31, Vc17a61.29, Vc17s352.51, Vc18a15.26, Vc18a46.32, Vc18p188.4, Vc18s180.20, Vc19a78.32, Vc19s110.25, Vc20a227.11, Vc20a234.17, Vc20p107.2, Vc20s322.41, Vc21a203.25, Vc21a294.30, Vc21s175.40, Vc21s24…	103	9109	411	52010	0.2506	7.10515e-05	****	0.000785391	***	Se vs Sa		GO:0016702	MF
354	GO:0016413	MF	O-acetyltransferase activity	Vc15a127.17, Vc19a192.21, Vc22a294.13, Vc43a95.26, Vc43p88.17, Vc47p111.7	6	1861	35	52010	0.1714	0.00138554	**	0.00580365	**	Ex vs Sa		354	GO:0010268	BP	brassinosteroid homeostasis	Vc13a159.12, Vc13p7.3, Vc14s282.27, Vc25s326.40, Vc26s130.36, Vc29s127.41, Vc2s328.40, Vc2s328.42, Vc30p263.5, Vc33s210.34, Vc42a90.16, Vc42p54.0, Vc57s9.35	13	7813	25	52010	0.52	1.70655e-05	****	0.000167098	***	Ex vs Se		354	GO:0000977	MF	RNA polymerase II transcription regulatory region sequence-specific DNA binding	Novel4493, Vc102a1.33, Vc12a60.42, Vc13a88.12, Vc13s88.16, Vc14a201.25, Vc16a8.26, Vc20p204.0, Vc22s30.36, Vc28a145.15, Vc2a240.26, Vc30a319.17, Vc30a319.18, Vc30s274.40, Vc32a276.18, Vc32a276.19, Vc35a254.29, Vc36a95.18, Vc37p88.0, Vc38a193.22, Vc39a214.16, Vc3a198.30, Vc42s50.41, Vc44a153.36, Vc7a410.40, Vc9a224.37	26	9109	70	52010	0.3714	7.40953e-05	****	0.000816723	***	Se vs Sa		GO:0016413	MF
355	GO:0009423	BP	chorismate biosynthetic process	Vc16a328.28, Vc18p70.25, Vc31s275.28, Vc34a235.26, Vc41a155.30, Vc7p79.3	6	1861	35	52010	0.1714	0.00138554	**	0.00580365	**	Ex vs Sa		355	GO:0047911	MF	galacturan 1,4-alpha-galacturonidase activity	Vc20a352.37, Vc21a51.39, Vc28a25.27, Vc29a52.37, Vc2s259.35, Vc33a283.24, Vc34a39.33, Vc37a181.25, Vc38a127.30, Vc39a133.33, Vc44a16.23, Vc49a28.31, Vc6s295.42	13	7813	25	52010	0.52	1.70655e-05	****	0.000167098	***	Ex vs Se		355	GO:0032451	MF	demethylase activity	Vc114a0.28, Vc11a382.34, Vc14a192.34, Vc17a128.25, Vc22a352.23, Vc24a20.37, Vc3a203.34, Vc46p187.10, Vc47a178.31, Vc51a21.53	10	9109	16	52010	0.625	7.69358e-05	****	0.000843269	***	Se vs Sa		GO:0009423	BP
356	GO:0006116	BP	NADH oxidation	Vc1326a0.7, Vc16a26.46, Vc18a376.35, Vc33a38.28, Vc7p401.11	5	1861	24	52010	0.2083	0.00140401	**	0.00586451	**	Ex vs Sa		356	GO:0034220	BP	monoatomic ion transmembrane transport	Vc1043s0.10, Vc12a376.30, Vc12a42.33, Vc12a5.23, Vc12s121.37, Vc16s68.33, Vc18a381.30, Vc22a6.34, Vc22a95.27, Vc22s320.38, Vc23a58.37, Vc26s291.22, Vc29a312.19, Vc29a7.41, Vc29s278.26, Vc321a0.30, Vc32a270.25, Vc32a55.30, Vc33s104.18, Vc34s6.46, Vc35a22.31, Vc39a271.23, Vc40a279.35, Vc40a49.29, Vc41a21.19, Vc43s55.51, Vc47a146.38, Vc4a104.13, Vc4s131.48, Vc673a0.12, Vc6a103.22, Vc6a63.29, Vc7a406…	35	7813	114	52010	0.307	1.72599e-05	****	0.000168527	***	Ex vs Se		356	GO:0046470	BP	phosphatidylcholine metabolic process	Vc12a350.33, Vc13s37.54, Vc23a33.25, Vc27a304.51, Vc30s293.49, Vc32p328.3, Vc34a41.39, Vc40p247.16, Vc41a231.31, Vc42a24.22	10	9109	16	52010	0.625	7.69358e-05	****	0.000843269	***	Se vs Sa		GO:0006116	BP
357	GO:0009719	BP	response to endogenous stimulus	Vc115a1.24, Vc22p59.6, Vc36s268.40	3	1861	7	52010	0.4286	0.00143655	**	0.00593375	**	Ex vs Sa		357	GO:0048471	CC	perinuclear region of cytoplasm	Vc17a165.31, Vc17p165.20, Vc17s165.44, Vc21a51.38, Vc22a115.30, Vc23a139.21, Vc26a52.34, Vc27s126.51, Vc27s128.42, Vc29a52.36, Vc33a283.25, Vc37s156.39, Vc38s277.25, Vc40s261.30, Vc41a143.23, Vc43a251.34, Vc8s210.24	17	7813	39	52010	0.4359	1.80255e-05	****	0.000175508	***	Ex vs Se		357	GO:0004190	MF	aspartic-type endopeptidase activity	Novel0132, Novel0180, Novel2156, Novel3465, Novel4239, Vc10s186.25, Vc13p141.11, Vc151p1.1, Vc15p231.16, Vc16a37.35, Vc16p151.5, Vc16s270.41, Vc17s9.31, Vc18a251.10, Vc1a247.15, Vc21a241.25, Vc282s0.58, Vc2a197.34, Vc30a293.32, Vc30a343.51, Vc30p225.1, Vc32a174.17, Vc32a327.34, Vc32p230.1, Vc34s284.47, Vc37s21.35, Vc37s223.35, Vc39a278.15, Vc39s94.24, Vc3a245.28, Vc42a23.34, Vc45a59.28, Vc5a186.1…	38	9109	118	52010	0.322	7.72174e-05	****	0.000843984	***	Se vs Sa		GO:0009719	BP
358	GO:0043447	BP	alkane biosynthetic process	Vc11a356.35, Vc15a348.38, Vc24a45.33	3	1861	7	52010	0.4286	0.00143655	**	0.00593375	**	Ex vs Sa		358	GO:0019722	BP	calcium-mediated signaling	Vc1s453.38, Vc21a37.16, Vc22a5.23, Vc35a3.24, Vc36a242.31, Vc5a410.20, Vc6a25.34, Vc6s15.51, Vc83a1.28, Vc8a14.36, Vc90a5.67, Vc9a61.43	12	7813	22	52010	0.5455	1.92336e-05	****	0.000186749	***	Ex vs Se		358	GO:0015748	BP	organophosphate ester transport	Vc117a2.46, Vc13a49.38, Vc17a320.36, Vc17s16.50, Vc1a4.37, Vc22a290.27, Vc23p169.3, Vc27a14.26, Vc27a324.29, Vc27a362.29, Vc306s0.56, Vc30a305.33, Vc32a12.31, Vc34a98.23, Vc34p257.19, Vc38a81.25, Vc42a12.33, Vc43a98.29, Vc45p29.15, Vc45p31.19, Vc46a143.20, Vc7a414.33, Vc964a0.6	23	9109	59	52010	0.3898	7.99691e-05	****	0.000871618	***	Se vs Sa		GO:0043447	BP
359	GO:0010310	BP	regulation of hydrogen peroxide metabolic process	Vc13p141.11, Vc30p225.1, Vc32p230.1	3	1861	7	52010	0.4286	0.00143655	**	0.00593375	**	Ex vs Sa		359	GO:0015145	MF	monosaccharide transmembrane transporter activity	Vc10a342.30, Vc12a215.16, Vc15a159.14, Vc1a69.26, Vc23a240.13, Vc24s214.30, Vc32a7.29, Vc40a87.29, Vc5a56.26, Vc8a353.26	10	7813	16	52010	0.625	1.94049e-05	****	0.000186846	***	Ex vs Se		359	GO:0009836	BP	fruit ripening, climacteric	Vc10a375.26, Vc10a60.47, Vc14a356.53, Vc14s356.75, Vc17p61.0, Vc1a368.30, Vc21p54.4, Vc21s266.29, Vc266a0.69, Vc266a0.70, Vc26a56.34, Vc29a55.29, Vc2s410.46, Vc32a261.26, Vc32a268.24, Vc33a280.28, Vc33a60.31, Vc34s149.17, Vc3p368.2, Vc45s33.29, Vc6s40.33, Vc7p347.6, Vc8a87.21, Vc8s354.40	24	9109	63	52010	0.381	8.6901e-05	****	0.000944243	***	Se vs Sa		GO:0010310	BP
360	GO:0009804	BP	coumarin metabolic process	Vc2a379.38, Vc38a291.14, Vc3a29.38	3	1861	7	52010	0.4286	0.00143655	**	0.00593375	**	Ex vs Sa		360	GO:0015749	BP	monosaccharide transmembrane transport	Vc10a342.30, Vc12a215.16, Vc15a159.14, Vc1a69.26, Vc23a240.13, Vc24s214.30, Vc32a7.29, Vc40a87.29, Vc5a56.26, Vc8a353.26	10	7813	16	52010	0.625	1.94049e-05	****	0.000186846	***	Ex vs Se		360	GO:0043878	MF	glyceraldehyde-3-phosphate dehydrogenase (NAD+) (non-phosphorylating) activity	Vc13s266.40, Vc30s135.49, Vc32s110.27, Vc35a318.28, Vc36s7.35, Vc42s179.34, Vc4a409.38, Vc9a408.29	8	9109	11	52010	0.7273	8.78422e-05	****	0.000944243	***	Se vs Sa		GO:0009804	BP
361	GO:0009744	BP	response to sucrose	Vc22a294.17, Vc43a88.21, Vc43a95.21, Vc47a111.19, Vc60s7.24, Vc74a7.30, Vc75a7.29, Vc81a1.30	8	1861	61	52010	0.1311	0.00144413	**	0.00594856	**	Ex vs Sa		361	GO:0046470	BP	phosphatidylcholine metabolic process	Vc12a350.33, Vc13s37.54, Vc23a33.25, Vc27a304.51, Vc30s293.49, Vc32p328.3, Vc34a41.39, Vc40p247.16, Vc41a231.31, Vc42a24.22	10	7813	16	52010	0.625	1.94049e-05	****	0.000186846	***	Ex vs Se		361	GO:0031222	BP	arabinan catabolic process	Vc16a122.23, Vc17s123.33, Vc18s72.38, Vc31a30.33, Vc34a229.41, Vc45a82.25, Vc7a310.16, Vc8a395.25	8	9109	11	52010	0.7273	8.78422e-05	****	0.000944243	***	Se vs Sa		GO:0009744	BP
362	GO:0016042	BP	lipid catabolic process	Vc10a66.28, Vc16a182.29, Vc1a374.32, Vc31a93.28, Vc32a308.29, Vc38a264.51, Vc42a8.27, Vc47a175.25, Vc5a353.27, Vc6a89.33, Vc8a78.30	11	1861	107	52010	0.1028	0.00159843	**	0.00654812	**	Ex vs Sa		362	GO:0005315	MF	inorganic phosphate transmembrane transporter activity	Vc10a260.15, Vc10p291.7, Vc117a2.46, Vc13a49.38, Vc17a330.31, Vc1a149.10, Vc1p115.0, Vc255s0.55, Vc27a288.30, Vc34a57.28, Vc42a12.33, Vc5p73.2, Vc5p73.3, Vc5s137.21, Vc7a414.33, Vc8a279.41, Vc8p300.2, Vc964a0.6	18	7813	43	52010	0.4186	2.02113e-05	****	0.000193538	***	Ex vs Se		362	GO:0010496	BP	intercellular transport	Vc17a15.27, Vc27a13.35, Vc31s56.26, Vc34a279.37, Vc37s99.32, Vc38a182.23, Vc45a55.26, Vc6s187.23	8	9109	11	52010	0.7273	8.78422e-05	****	0.000944243	***	Se vs Sa		GO:0016042	BP
363	GO:0005544	MF	calcium-dependent phospholipid binding	Vc22a98.36, Vc31a206.22, Vc37a154.17, Vc38a153.21, Vc7s141.16, Vc831a0.8	6	1861	36	52010	0.1667	0.00161284	**	0.00654812	**	Ex vs Sa		363	GO:0016760	MF	cellulose synthase (UDP-forming) activity	Vc14a269.40, Vc17a8.20, Vc25s315.38, Vc26a18.27, Vc27a6.24, Vc2a317.29, Vc34a286.31, Vc35a131.33, Vc35s26.28, Vc36s299.43, Vc39a279.32, Vc39a279.34, Vc3a93.23, Vc43a261.31, Vc43a44.42, Vc6a97.28, Vc7a204.26, Vc83a3.20	18	7813	43	52010	0.4186	2.02113e-05	****	0.000193538	***	Ex vs Se		363	GO:0009514	CC	glyoxysome	Vc2a393.33, Vc35a277.30, Vc36s49.50, Vc37s29.46, Vc38a235.19, Vc39s265.30, Vc6s106.41, Vc9a360.40	8	9109	11	52010	0.7273	8.78422e-05	****	0.000944243	***	Se vs Sa		GO:0005544	MF
364	GO:0009299	BP	mRNA transcription	Novel0883, Vc20p93.7, Vc28p268.22, Vc503p0.5	4	1861	15	52010	0.2667	0.00162492	**	0.00654812	**	Ex vs Sa		364	GO:0031408	BP	oxylipin biosynthetic process	Vc10a342.29, Vc12a78.41, Vc1p68.6, Vc22a254.31, Vc23a360.28, Vc27a303.29, Vc29a9.33, Vc33s306.55, Vc34a42.49, Vc40s9.40, Vc41s61.32, Vc43a132.31, Vc44a222.27, Vc46a86.22, Vc47a69.25, Vc5a55.26, Vc7a383.31, Vc8a85.28, Vc8s354.37	19	7813	47	52010	0.4043	2.17484e-05	****	0.000207685	***	Ex vs Se		364	GO:0019318	BP	hexose metabolic process	Vc13a332.32, Vc13s83.32, Vc187a1.46, Vc23a347.25, Vc26a1.31, Vc30p67.1, Vc32a1.28, Vc32s281.36, Vc33a315.24, Vc33a325.28, Vc42a254.11	11	9109	19	52010	0.5789	8.89893e-05	****	0.000953945	***	Se vs Sa		GO:0009299	BP
365	GO:0004020	MF	adenylylsulfate kinase activity	Vc13a114.33, Vc32s260.27, Vc35a32.30, Vc36a275.38	4	1861	15	52010	0.2667	0.00162492	**	0.00654812	**	Ex vs Sa		365	GO:0016126	BP	sterol biosynthetic process	Vc12a15.23, Vc12a31.26, Vc12a374.21, Vc13a32.22, Vc14a192.34, Vc17s219.15, Vc23a292.22, Vc23p364.3, Vc23s55.27, Vc27p200.0, Vc287p0.15, Vc30a287.23, Vc34p156.4, Vc3a203.34, Vc40a277.14, Vc40a48.15, Vc41a256.15, Vc42a29.16, Vc43a238.20, Vc45a200.22	20	7813	51	52010	0.3922	2.26677e-05	****	0.000215871	***	Ex vs Se		365	GO:0030060	MF	L-malate dehydrogenase activity	Vc10a30.27, Vc17p79.24, Vc22a47.36, Vc27p23.19, Vc2a393.33, Vc34p269.11, Vc35s22.36, Vc36a260.22, Vc45p44.27, Vc4s65.63, Vc5p392.7, Vc775a0.11, Vc9p40.21	13	9109	25	52010	0.52	9.0994e-05	****	0.000967462	***	Se vs Sa		GO:0004020	MF
366	GO:0010337	BP	regulation of salicylic acid metabolic process	Vc13p141.11, Vc2a101.19, Vc30p225.1, Vc32p230.1	4	1861	15	52010	0.2667	0.00162492	**	0.00654812	**	Ex vs Sa		366	GO:0016864	MF	intramolecular oxidoreductase activity, transposing S-S bonds	Vc14a283.32, Vc21s175.40, Vc24a125.25, Vc25a326.33, Vc26a176.27, Vc29s169.31, Vc2a329.32, Vc33s172.23, Vc34a29.26, Vc37a173.13, Vc37s99.30, Vc38a135.12, Vc38a182.26, Vc39a141.17, Vc3p75.0, Vc6a186.10	16	7813	36	52010	0.4444	2.35823e-05	****	0.000223967	***	Ex vs Se		366	GO:0004630	MF	phospholipase D activity	Vc12a350.33, Vc13s37.54, Vc23a33.25, Vc23s108.36, Vc27a304.51, Vc28a82.25, Vc30s293.49, Vc32p328.3, Vc34a41.39, Vc40p247.16, Vc41a231.31, Vc42a24.22, Vc44s77.24	13	9109	25	52010	0.52	9.0994e-05	****	0.000967462	***	Se vs Sa		GO:0010337	BP
[truncated: 1,083 more rows]
[truncated: 4 more columns]

## Sheet: Table S4_GO enrichment plot
Rank	GO_pannzer2_ID	class	GO_pannzer2_Name	IDs	S	TS	B	TB	Rich.Factor	P.value	Sig.Sign.P	Q.value	Sig.Sign.Q
[truncated: 92 more rows]
