# Supplementary material for: Integrated Untargeted Metabolome, Full-Length Sequencing and Transcriptome Analyses Reveal the Mechanism of Flavonoid Biosynthesis in Blueberry (Vaccinium spp.) Fruit
Source: Int J Mol Sci. 2024 Apr 9;25(8):4137. doi: 10.3390/ijms25084137 (PMC11050320; doi:10.3390/ijms25084137)
Supplement: Supplementary file 1 [file ijms-25-04137-s001.zip › Table S5. Metabolite categories related to DEGs enriched in GO terms..xlsx]

## Sheet: Table S5
Table S5. Metabolite categories related to DEGs enriched in GO terms.
DEGs_Flavonoids-187	Ex vs Sa-2764=2158+606	Ex vs Se-12310	Se vs Sa-13925	GO_pannzer2			DEGs_Phenylpropanoids-249	Ex vs Sa-2764=2158+606	Ex vs Se-12310	Se vs Sa-13925	GO_pannzer2			DEGs_carbohydrate-548	Ex vs Sa-2764	Ex vs Se-12310	Se vs Sa-13925	Ex vs Sa-2764=2158+606	Ex vs Se-12310	Se vs Sa-13925	GO_pannzer2			DEGs_Terpenoids-136	Ex vs Sa-2764=2158+606	Ex vs Se-12310	Se vs Sa-13925	GO_pannzer2			DEGs_Alkaloids-144	Ex vs Sa-2764=2158+606	Ex vs Se-12310	Se vs Sa-13925	GO_pannzer2			DEGs_Lipids-431	Ex vs Sa-2764=2158+606	Ex vs Se-12310	Se vs Sa-13925	GO_pannzer2
Novel2248	up	up	normal	GO:0002238;GO:0007033;GO:0009507;GO:0009611;GO:0009753;GO:0009805;GO:0010023;GO:0016705;GO:0031418;GO:0046872;GO:0051213;	Flavonoids		Novel0854	up	up	normal	GO:0005524;GO:0005737;GO:0009698;GO:0016020;GO:0016207;GO:0016491;	Phenylpropanoids		Novel2630	no	yes	yes	normal	down	up	GO:0002229;GO:0004672;GO:0004888;GO:0005524;GO:0005886;GO:0007178;GO:0016310;GO:0030246;GO:0042742;	carbohydrate		Novel4995	normal	down	up	GO:0008194;GO:0009813;GO:0016020;GO:0016114;GO:0046148;GO:0046283;GO:0046527;	Terpenoids		Novel0044	up	up	normal	GO:0005576;GO:0005773;GO:0009820;GO:0016491;GO:0042179;GO:0071949;	Alkaloids		Novel0179	up	up	normal	GO:0006869;GO:0008289;GO:0009826;GO:0016020;GO:0045165;GO:0090376;	Lipids
Novel3202	up	up	normal	GO:0005783;GO:0008194;GO:0009813;GO:0046148;GO:0046283;GO:0046527;	Flavonoids		Novel0961	up	up	normal	GO:0009723;GO:0009836;GO:0047205;	Phenylpropanoids		Novel3475	yes	no	yes	up	normal	up	GO:0000785;GO:0003712;GO:0004812;GO:0005634;GO:0006338;GO:0006357;GO:0008168;GO:0030246;GO:0031490;GO:0032259;GO:0032454;GO:0070013;GO:1902494;GO:2000039;	carbohydrate		Vc10a113.26	normal	down	up	GO:0008194;GO:0009813;GO:0016020;GO:0016114;GO:0046148;GO:0046283;GO:0046527;	Terpenoids		Novel1893	normal	up	down	GO:0005515;GO:0006511;GO:0006527;GO:0008295;GO:0008792;GO:0009409;GO:0009507;GO:0009820;GO:0042179;	Alkaloids		Novel0761	normal	down	up	GO:0006869;GO:0008289;GO:0031640;GO:0042742;GO:0050832;	Lipids
Novel3539	up	up	normal	GO:0009058;GO:0009714;GO:0009812;GO:0016747;GO:0030638;GO:0042803;	Flavonoids		Novel0966	up	up	normal	GO:0002238;GO:0009805;GO:0031418;GO:0045486;GO:0046872;	Phenylpropanoids		Novel4981	no	yes	yes	normal	up	down	GO:0005576;GO:0005975;GO:0016020;GO:0030246;GO:0102210;GO:1901575;	carbohydrate		Vc10a113.31	normal	normal	up	GO:0008194;GO:0009813;GO:0016020;GO:0016114;GO:0046148;GO:0046283;GO:0046527;	Terpenoids		Novel4248	normal	up	down	GO:0005829;GO:0009820;GO:0016020;GO:0030600;	Alkaloids		Novel1225	normal	down	up	GO:0001101;GO:0005737;GO:0006629;GO:0006883;GO:0006979;GO:0009644;GO:0009898;GO:0010035;GO:0010286;GO:0010431;GO:0030644;GO:0031967;GO:0042538;GO:0043231;GO:0050826;GO:1901002;GO:1901562;GO:1901700;GO:1902884;	Lipids
Novel4416	up	up	normal	GO:0005634;GO:0005783;GO:0006979;GO:0009611;GO:0009629;GO:0009705;GO:0009714;GO:0009733;GO:0009753;GO:0009813;GO:0009926;GO:0010224;GO:0016747;GO:0016853;GO:0019438;GO:0030638;GO:0031540;GO:0034081;GO:0042181;GO:0042803;GO:0044550;GO:0120255;GO:1901362;GO:1901696;	Flavonoids		Novel2248	up	up	normal	GO:0002238;GO:0007033;GO:0009507;GO:0009611;GO:0009753;GO:0009805;GO:0010023;GO:0016705;GO:0031418;GO:0046872;GO:0051213;	Phenylpropanoids		Novel5261	no	yes	yes	normal	down	up	GO:0003677;GO:0005634;GO:0016020;GO:0016301;GO:0016310;GO:0030246;GO:0046872;GO:0046983;	carbohydrate		Vc10a192.35	up	up	normal	GO:0004497;GO:0005506;GO:0016020;GO:0016114;GO:0016125;GO:0016134;GO:0016705;GO:0019742;GO:0020037;	Terpenoids		Vc10p338.6	up	up	normal	GO:0009820;GO:0016020;GO:0016787;GO:0033987;	Alkaloids		Novel2048	up	up	normal	GO:0006869;GO:0008289;GO:0090378;	Lipids
Novel4517	normal	normal	down	GO:0008194;GO:0009813;GO:0046527;	Flavonoids		Vc10a222.29	up	up	normal	GO:0005737;GO:0006558;GO:0009074;GO:0009800;GO:0032991;GO:0045548;GO:1902222;	Phenylpropanoids		Novel5484	no	yes	yes	normal	up	down	GO:0005576;GO:0005975;GO:0016020;GO:0030246;GO:0102210;GO:1901575;	carbohydrate		Vc10p43.7	down	normal	down	GO:0009570;GO:0009688;GO:0016121;GO:0016702;GO:0046872;	Terpenoids		Vc10s181.40	normal	down	up	GO:0004177;GO:0004252;GO:0006508;GO:0009820;	Alkaloids		Novel3199	up	up	normal	GO:0006633;GO:0007165;GO:0009922;GO:0016020;	Lipids
Novel4995	normal	down	up	GO:0008194;GO:0009813;GO:0016020;GO:0016114;GO:0046148;GO:0046283;GO:0046527;	Flavonoids		Vc10a222.30	normal	up	normal	GO:0005737;GO:0006558;GO:0009074;GO:0009800;GO:0045548;GO:1902222;	Phenylpropanoids		Vc102a4.44	no	yes	yes	normal	up	down	GO:0005886;GO:0008643;GO:0051119;GO:0055085;	carbohydrate		Vc11a233.23	normal	up	down	GO:0005829;GO:0006561;GO:0009408;GO:0009414;GO:0009507;GO:0009687;GO:0009750;GO:0010115;GO:0016106;GO:0016616;GO:0042802;GO:0043289;GO:0072330;GO:0120255;GO:1902645;	Terpenoids		Vc112a0.32	up	up	normal	GO:0004497;GO:0005506;GO:0016020;GO:0016705;GO:0020037;GO:0033075;GO:0051762;	Alkaloids		Vc10a128.22	normal	up	down	GO:0006629;GO:0016020;GO:0016717;GO:0045485;GO:0072330;	Lipids
Vc10a113.26	normal	down	up	GO:0008194;GO:0009813;GO:0016020;GO:0016114;GO:0046148;GO:0046283;GO:0046527;	Flavonoids		Vc10p123.6	normal	up	down	GO:0080037;GO:2000762;	Phenylpropanoids		Vc1030p0.0	no	no	yes	normal	normal	down	GO:0008643;GO:0016020;GO:0016740;	carbohydrate		Vc11p278.8	normal	up	down	GO:0009570;GO:0016121;GO:0016702;GO:0046872;	Terpenoids		Vc119s3.55	normal	up	down	GO:0000325;GO:0004185;GO:0005576;GO:0006508;GO:0009820;GO:0016020;GO:0016462;	Alkaloids		Vc10a131.14	normal	up	down	GO:0006629;GO:0016020;GO:0016717;	Lipids
Vc10a113.31	normal	normal	up	GO:0008194;GO:0009813;GO:0016020;GO:0016114;GO:0046148;GO:0046283;GO:0046527;	Flavonoids		Vc10p225.6	up	up	normal	GO:0005737;GO:0006558;GO:0009074;GO:0009800;GO:0045548;GO:1902222;	Phenylpropanoids		Vc103a1.29	yes	yes	no	up	up	normal	GO:0004674;GO:0004713;GO:0005524;GO:0016020;GO:0016310;GO:0030246;GO:0031625;GO:0048544;GO:0051707;GO:0071944;GO:0106310;	carbohydrate		Vc12a15.23	normal	up	down	GO:0004420;GO:0005777;GO:0005789;GO:0006722;GO:0008299;GO:0009646;GO:0009753;GO:0009941;GO:0015936;GO:0016126;GO:0016135;GO:0031903;GO:0031966;GO:0042170;	Terpenoids		Vc11a306.33	up	up	normal	GO:0009820;GO:0016020;GO:0016740;GO:0016787;	Alkaloids		Vc10a149.15	normal	up	down	GO:0003841;GO:0004623;GO:0004771;GO:0004806;GO:0005773;GO:0005777;GO:0006071;GO:0006641;GO:0012511;GO:0016020;GO:0016042;GO:0016301;GO:0016310;GO:0044248;GO:0045735;	Lipids
Vc10a224.19	normal	down	up	GO:0003677;GO:0005634;GO:0006355;GO:0007389;GO:0009734;GO:0009738;GO:0009743;GO:0010154;GO:0016787;GO:0031540;GO:0048366;GO:0048441;GO:0048442;GO:0048589;GO:0048829;GO:0051301;	Flavonoids		Vc117a0.21	up	up	normal	GO:0016020;GO:0016592;GO:0016787;GO:2000762;	Phenylpropanoids		Vc10a135.35	no	no	yes	normal	normal	up	GO:0005975;GO:0006396;GO:0008184;	carbohydrate		Vc12a304.18	up	up	normal	GO:0005789;GO:0005811;GO:0005992;GO:0016104;GO:0031559;	Terpenoids		Vc11a383.35	normal	normal	up	GO:0005515;GO:0005634;GO:0005737;GO:0009820;GO:0009939;GO:0010325;GO:0010331;GO:0010476;GO:0010629;GO:0016787;GO:0048444;GO:0048530;GO:1905516;	Alkaloids		Vc10a249.13	normal	down	up	GO:0005829;GO:0008289;GO:0015248;GO:0015918;GO:0016020;GO:0043231;GO:0097159;	Lipids
Vc10p159.9	normal	up	down	GO:0008194;GO:0009813;	Flavonoids		Vc11a145.15	up	up	normal	GO:0005524;GO:0009723;GO:0009805;GO:0009836;GO:0015995;GO:0016746;GO:0016851;	Phenylpropanoids		Vc10a136.27	no	yes	yes	normal	up	down	GO:0005975;GO:0046872;GO:0047274;GO:0052692;	carbohydrate		Vc12a31.26	normal	up	down	GO:0004420;GO:0005777;GO:0005789;GO:0006722;GO:0008299;GO:0009646;GO:0009753;GO:0009941;GO:0015936;GO:0016126;GO:0016135;GO:0031903;GO:0031966;GO:0042170;	Terpenoids		Vc11p246.8	up	up	down	GO:0005773;GO:0009820;GO:0016020;GO:0016491;GO:0042179;GO:0071949;	Alkaloids		Vc10a317.18	normal	up	down	GO:0003723;GO:0003735;GO:0005737;GO:0006412;GO:0008289;GO:0015935;GO:0016020;	Lipids
Vc11a169.30	normal	normal	down	GO:0003677;GO:0005634;GO:0009416;GO:0009718;GO:0015995;GO:0045893;	Flavonoids		Vc11a255.46	normal	up	down	GO:0004334;GO:0006558;GO:0006572;GO:0016020;GO:0046872;GO:0051087;GO:1902000;GO:1902222;	Phenylpropanoids		Vc10a137.20	no	yes	yes	normal	up	down	GO:0005975;GO:0046872;GO:0047274;GO:0052692;	carbohydrate		Vc12a323.22	up	up	normal	GO:0004497;GO:0005506;GO:0016020;GO:0016114;GO:0016125;GO:0016135;GO:0016705;GO:0020037;	Terpenoids		Vc126p0.2	normal	up	down	GO:0005515;GO:0006527;GO:0008295;GO:0008792;GO:0009409;GO:0009507;GO:0009820;GO:0016491;GO:0042179;	Alkaloids		Vc10a342.29	normal	up	down	GO:0005737;GO:0006633;GO:0016020;GO:0016702;GO:0031408;GO:0034440;GO:0046872;	Lipids
Vc11a302.17	normal	up	down	GO:0003677;GO:0005634;GO:0006355;GO:0007389;GO:0009734;GO:0009738;GO:0009743;GO:0010154;GO:0031540;GO:0048366;GO:0048441;GO:0048442;GO:0048589;GO:0048829;GO:0051301;	Flavonoids		Vc11a288.26	up	up	normal	GO:0004664;GO:0006558;GO:0009095;GO:0009570;GO:0047769;GO:1902223;	Phenylpropanoids		Vc10a255.15	no	no	yes	normal	normal	up	GO:0008643;GO:0016301;GO:0016310;GO:0031969;GO:0099402;	carbohydrate		Vc12a395.19	up	normal	normal	GO:0003677;GO:0003700;GO:0004497;GO:0005506;GO:0005634;GO:0006355;GO:0016020;GO:0016114;GO:0016705;GO:0020037;	Terpenoids		Vc12a84.45	normal	normal	down	GO:0004497;GO:0005506;GO:0016020;GO:0016705;GO:0020037;GO:0033076;GO:0044550;GO:1901576;	Alkaloids		Vc10a348.25	normal	up	down	GO:0002933;GO:0004497;GO:0005506;GO:0016020;GO:0016705;GO:0020037;GO:0048653;GO:0051792;GO:0080110;	Lipids
Vc11p337.3	normal	up	normal	GO:0008194;GO:0009813;GO:0046148;GO:0046283;GO:0046527;	Flavonoids		Vc11p17.1	down	normal	down	GO:0009699;GO:0048046;	Phenylpropanoids		Vc10a342.30	yes	yes	no	up	up	normal	GO:0003825;GO:0004805;GO:0006817;GO:0008324;GO:0009055;GO:0009414;GO:0009651;GO:0009737;GO:0015145;GO:0015267;GO:0015293;GO:0015749;GO:0016020;GO:0022853;GO:0022890;GO:0022900;GO:0071944;GO:0072488;	carbohydrate		Vc13p70.4	normal	up	down	GO:0005509;GO:0006886;GO:0006888;GO:0008194;GO:0008270;GO:0009813;GO:0016114;GO:0030127;GO:0046148;GO:0046283;GO:0046527;	Terpenoids		Vc12p83.4	normal	down	up	GO:0004497;GO:0005506;GO:0016020;GO:0016705;GO:0020037;GO:0033075;	Alkaloids		Vc10a361.24	normal	up	down	GO:0006633;GO:0009507;GO:0009532;GO:0019904;GO:0031177;GO:0044620;GO:0140414;	Lipids
Vc11p356.13	up	up	normal	GO:0008194;GO:0009813;	Flavonoids		Vc11p260.30	normal	normal	up	GO:0005777;GO:0006631;GO:0009507;GO:0009698;GO:0016020;GO:0016207;GO:0031956;GO:0042372;GO:0106290;	Phenylpropanoids		Vc10s13.29	no	yes	yes	normal	up	down	GO:0000325;GO:0006817;GO:0008643;GO:0016020;GO:0022857;GO:0042631;GO:0055085;	carbohydrate		Vc13p8.4	up	normal	up	GO:0003755;GO:0004497;GO:0005506;GO:0016020;GO:0016114;GO:0016705;GO:0020037;GO:0051762;	Terpenoids		Vc12p86.3	normal	normal	up	GO:0004177;GO:0004197;GO:0006508;GO:0008236;GO:0008242;GO:0009820;	Alkaloids		Vc10a387.25	normal	up	normal	GO:0000166;GO:0003878;GO:0005737;GO:0006085;GO:0006099;GO:0006629;GO:0016829;GO:0016874;GO:0035639;GO:0046872;GO:0072330;GO:0097367;	Lipids
Vc11s112.24	normal	up	down	GO:0009705;GO:0010023;GO:0010162;GO:0015078;GO:0015297;GO:0022853;GO:0042910;GO:0097437;GO:1902600;GO:1990961;	Flavonoids		Vc11p299.22	up	up	normal	GO:0005737;GO:0006558;GO:0009074;GO:0009800;GO:0016597;GO:0032991;GO:0045548;GO:1902222;	Phenylpropanoids		Vc10s13.30	no	yes	yes	normal	up	down	GO:0004553;GO:0005975;	carbohydrate		Vc148s2.69	normal	down	up	GO:0002238;GO:0005789;GO:0005811;GO:0009723;GO:0009753;GO:0010038;GO:0016104;GO:0019742;GO:0031559;GO:0042542;GO:0071731;GO:1901362;	Terpenoids		Vc12s87.25	normal	normal	up	GO:0004392;GO:0006788;GO:0009820;GO:0016020;GO:0016787;GO:0017025;GO:0070897;	Alkaloids		Vc10a66.28	up	up	normal	GO:0005576;GO:0016020;GO:0016042;GO:0016788;	Lipids
Vc12a74.33	normal	down	up	GO:0008194;GO:0009813;GO:0046527;	Flavonoids		Vc11s212.32	down	up	down	GO:0002238;GO:0009692;GO:0009805;GO:0009815;GO:0009835;GO:0016706;GO:0031418;GO:0043450;GO:0046872;	Phenylpropanoids		Vc10s398.35	no	yes	no	normal	up	normal	GO:0005794;GO:0008643;GO:0015297;GO:0016020;GO:0055085;	carbohydrate		Vc14a326.39	normal	down	up	GO:0003676;GO:0004523;GO:0005737;GO:0008194;GO:0009813;GO:0016114;GO:0046527;	Terpenoids		Vc13a159.12	normal	up	normal	GO:0004497;GO:0005506;GO:0010268;GO:0016020;GO:0016125;GO:0016132;GO:0016705;GO:0020037;GO:0033075;GO:0048366;GO:0051762;GO:0080132;GO:1902652;	Alkaloids		Vc10a7.40	normal	up	normal	GO:0000166;GO:0003989;GO:0006633;GO:0009317;GO:0016020;	Lipids
Vc12a74.34	normal	down	up	GO:0008194;GO:0009813;GO:0046527;	Flavonoids		Vc11s215.35	normal	up	down	GO:0004334;GO:0006558;GO:0006572;GO:0046872;GO:0051087;GO:1902000;GO:1902222;	Phenylpropanoids		Vc10s46.39	no	no	yes	normal	normal	down	GO:0005886;GO:0034219;GO:0051119;	carbohydrate		Vc14s19.34	up	up	normal	GO:0004497;GO:0005506;GO:0006714;GO:0009414;GO:0009737;GO:0009835;GO:0016020;GO:0016115;GO:0016125;GO:0016705;GO:0020037;GO:0032787;GO:0043288;GO:0046164;GO:0046395;GO:0051762;GO:0120254;GO:1902644;	Terpenoids		Vc13s119.30	normal	up	normal	GO:0003860;GO:0009704;GO:0009820;GO:0080167;GO:0106435;	Alkaloids		Vc10s131.20	normal	up	down	GO:0006629;GO:0016020;GO:0016717;	Lipids
Vc12p300.7	normal	down	up	GO:0008194;GO:0009636;GO:0009809;GO:0009813;GO:0016020;GO:0042178;GO:0046148;GO:0046283;GO:0046527;	Flavonoids		Vc11s320.37	normal	up	down	GO:0016020;GO:0016616;GO:0016621;	Phenylpropanoids		Vc114a2.35	no	yes	no	normal	down	normal	GO:0004560;GO:0005975;GO:0016020;GO:0048046;	carbohydrate		Vc156a1.31	up	up	normal	GO:0000287;GO:0010333;GO:0016102;	Terpenoids		Vc13s178.29	normal	up	down	GO:0003824;GO:0009653;GO:0009820;GO:0016020;	Alkaloids		Vc10s186.25	normal	up	down	GO:0004190;GO:0006629;GO:0016020;	Lipids
Vc13a19.21	normal	down	up	GO:0008194;GO:0009813;GO:0016020;GO:0046527;	Flavonoids		Vc11s369.50	up	normal	normal	GO:0002238;GO:0009805;GO:0016705;GO:0031418;GO:0046872;GO:0051213;	Phenylpropanoids		Vc1150p0.6	no	yes	yes	normal	up	down	GO:0004674;GO:0004715;GO:0005524;GO:0005886;GO:0016310;GO:0030246;GO:0050896;	carbohydrate		Vc15a227.19	normal	up	down	GO:0005829;GO:0006561;GO:0009408;GO:0009414;GO:0009507;GO:0009687;GO:0009750;GO:0010115;GO:0016106;GO:0016616;GO:0042802;GO:0043289;GO:0072330;GO:0120255;GO:1902645;	Terpenoids		Vc140a1.34	normal	normal	down	GO:0001666;GO:0004024;GO:0005829;GO:0008270;GO:0009409;GO:0009413;GO:0009414;GO:0009651;GO:0009737;GO:0009744;GO:0031000;GO:0032355;GO:0042542;GO:0042803;GO:0046294;GO:0051903;GO:1900039;	Alkaloids		Vc10s322.15	up	up	normal	GO:0006633;GO:0009922;GO:0016020;	Lipids
Vc13a238.27	up	up	normal	GO:0004497;GO:0005506;GO:0009699;GO:0009813;GO:0016020;GO:0016705;GO:0020037;GO:0051762;GO:0098827;	Flavonoids		Vc11s396.32	normal	down	up	GO:0009698;GO:0016207;	Phenylpropanoids		Vc115p2.20	no	yes	yes	normal	up	down	GO:0000325;GO:0006817;GO:0008643;GO:0009409;GO:0009414;GO:0009744;GO:0009749;GO:0009750;GO:0016020;GO:0019900;GO:0022857;GO:0032440;GO:0055085;	carbohydrate		Vc15a369.30	normal	up	down	GO:0000287;GO:0009507;GO:0009685;GO:0009905;GO:0010333;GO:0016102;GO:0016740;GO:0046394;GO:0050559;	Terpenoids		Vc14a69.29	normal	up	down	GO:0000325;GO:0004185;GO:0005576;GO:0006508;GO:0009820;GO:0016020;GO:0016462;	Alkaloids		Vc11a199.24	normal	down	up	GO:0000981;GO:0003677;GO:0005634;GO:0006357;GO:0008289;	Lipids
Vc13a41.36	up	up	down	GO:0009813;GO:0016491;GO:0031418;GO:0043473;GO:0046872;	Flavonoids		Vc1260a0.2	normal	down	up	GO:0002238;GO:0009416;GO:0009686;GO:0009805;GO:0009826;GO:0009899;GO:0009908;GO:0016491;GO:0031418;GO:0046872;	Phenylpropanoids		Vc117a2.44	no	yes	yes	normal	up	down	GO:0003723;GO:0003873;GO:0004331;GO:0005634;GO:0005737;GO:0006397;GO:0046835;	carbohydrate		Vc15p262.8	normal	up	down	GO:0009570;GO:0016121;GO:0016702;GO:0046872;	Terpenoids		Vc14p380.8	normal	up	down	GO:0005515;GO:0006527;GO:0008295;GO:0008792;GO:0009409;GO:0009507;GO:0009820;GO:0016491;GO:0042179;	Alkaloids		Vc11a356.35	up	up	normal	GO:0016020;GO:0016491;GO:0020037;GO:0042761;GO:0043231;GO:0043447;GO:0046872;	Lipids
Vc13a46.32	up	up	normal	GO:0005634;GO:0005783;GO:0006979;GO:0009611;GO:0009629;GO:0009699;GO:0009705;GO:0009714;GO:0009733;GO:0009753;GO:0009813;GO:0009926;GO:0010224;GO:0016210;GO:0030639;GO:0031540;GO:0034081;GO:0042181;GO:0042803;GO:0050350;GO:0102128;GO:0120255;GO:1901696;	Flavonoids		Vc12p300.7	normal	down	up	GO:0008194;GO:0009636;GO:0009809;GO:0009813;GO:0016020;GO:0042178;GO:0046148;GO:0046283;GO:0046527;	Phenylpropanoids		Vc118p3.13	no	yes	yes	normal	down	up	GO:0005886;GO:0008643;GO:0051119;GO:0055085;	carbohydrate		Vc16a174.22	normal	up	down	GO:0009507;GO:0009526;GO:0009687;GO:0016020;GO:0016106;GO:0031976;GO:0043289;GO:0052662;GO:0071949;GO:0072330;GO:0120255;GO:1902645;	Terpenoids		Vc14s111.28	normal	up	down	GO:0006629;GO:0009820;GO:0016020;	Alkaloids		Vc11a53.18	up	up	up	GO:0006633;GO:0009922;GO:0016020;GO:0090377;	Lipids
Vc13a67.37	up	up	normal	GO:0003854;GO:0006694;GO:0016621;GO:0045552;	Flavonoids		Vc12s40.56	normal	up	down	GO:0005777;GO:0009611;GO:0009617;GO:0009695;GO:0009698;GO:0009753;GO:0016020;GO:0016207;	Phenylpropanoids		Vc11a167.32	no	yes	yes	normal	up	down	GO:0006817;GO:0015078;GO:0015144;GO:0015293;GO:0016020;GO:0022853;GO:0034219;GO:0050896;GO:1902600;	carbohydrate		Vc16a366.33	normal	normal	up	GO:0004497;GO:0005506;GO:0016020;GO:0016114;GO:0016705;GO:0020037;GO:0033075;GO:0051762;	Terpenoids		Vc15a247.22	normal	normal	down	GO:0009820;GO:0016020;GO:0016298;	Alkaloids		Vc11p20.10	up	normal	up	GO:0006629;GO:0016020;GO:0016717;GO:0016720;GO:0045485;GO:0072330;GO:0098827;	Lipids
Vc13p166.8	up	up	down	GO:0006720;GO:0009718;GO:0016020;GO:0045552;GO:0047890;	Flavonoids		Vc13a238.27	up	up	normal	GO:0004497;GO:0005506;GO:0009699;GO:0009813;GO:0016020;GO:0016705;GO:0020037;GO:0051762;GO:0098827;	Phenylpropanoids		Vc11a296.20	no	yes	yes	normal	up	down	GO:0004560;GO:0005975;	carbohydrate		Vc16s306.25	normal	normal	down	GO:0009570;GO:0016020;GO:0016121;GO:0016124;GO:0016702;GO:0046872;	Terpenoids		Vc15a291.31	up	up	normal	GO:0009820;GO:0016020;GO:0016740;GO:0016787;	Alkaloids		Vc11p255.8	normal	up	down	GO:0006629;GO:0008374;GO:0016020;GO:0102966;	Lipids
Vc13p70.2	normal	up	down	GO:0005509;GO:0006886;GO:0006888;GO:0008194;GO:0008270;GO:0009813;GO:0030127;GO:0046148;GO:0046283;GO:0046527;	Flavonoids		Vc13a46.32	up	up	normal	GO:0005634;GO:0005783;GO:0006979;GO:0009611;GO:0009629;GO:0009699;GO:0009705;GO:0009714;GO:0009733;GO:0009753;GO:0009813;GO:0009926;GO:0010224;GO:0016210;GO:0030639;GO:0031540;GO:0034081;GO:0042181;GO:0042803;GO:0050350;GO:0102128;GO:0120255;GO:1901696;	Phenylpropanoids		Vc11a305.23	no	yes	yes	normal	down	up	GO:0004565;GO:0005773;GO:0005975;GO:0016020;GO:0030246;GO:0048046;	carbohydrate		Vc18a93.23	normal	up	down	GO:0009570;GO:0016020;GO:0016121;GO:0016702;GO:0046872;	Terpenoids		Vc15a58.22	up	up	normal	GO:0004620;GO:0004806;GO:0006629;GO:0009507;GO:0009820;GO:0047714;	Alkaloids		Vc11s340.47	normal	up	down	GO:0005576;GO:0016020;GO:0017040;GO:0042759;GO:0046512;GO:0046514;GO:0102121;	Lipids
Vc13p70.4	normal	up	down	GO:0005509;GO:0006886;GO:0006888;GO:0008194;GO:0008270;GO:0009813;GO:0016114;GO:0030127;GO:0046148;GO:0046283;GO:0046527;	Flavonoids		Vc13a67.37	up	up	normal	GO:0003854;GO:0006694;GO:0016621;GO:0045552;	Phenylpropanoids		Vc11a394.26	no	yes	yes	normal	down	up	GO:0000502;GO:0005975;GO:0016787;GO:0047268;GO:0047274;	carbohydrate		Vc18s145.24	up	up	normal	GO:0005739;GO:0005829;GO:0006561;GO:0008667;GO:0009408;GO:0009414;GO:0009687;GO:0009750;GO:0010115;GO:0016020;GO:0016106;GO:0016616;GO:0042802;GO:0043289;GO:0072330;GO:0120255;GO:1902645;	Terpenoids		Vc15p242.0	up	up	normal	GO:0005576;GO:0009820;GO:0016491;GO:0071949;	Alkaloids		Vc11s61.32	normal	up	down	GO:0002933;GO:0005506;GO:0016705;GO:0020037;GO:0048653;GO:0051792;GO:0052722;GO:0080110;	Lipids
Vc13s19.30	normal	down	up	GO:0008194;GO:0009813;GO:0016020;GO:0046527;	Flavonoids		Vc13s341.30	normal	up	down	GO:0008171;GO:0008757;GO:0009809;GO:0032259;GO:0102822;	Phenylpropanoids		Vc11p335.2	no	yes	yes	normal	up	down	GO:0001067;GO:0003690;GO:0003700;GO:0004553;GO:0005515;GO:0005634;GO:0005829;GO:0005975;GO:0006355;GO:0009410;GO:0043565;GO:0080183;GO:1902680;	carbohydrate		Vc19a379.34	normal	up	down	GO:0000287;GO:0009507;GO:0009685;GO:0009905;GO:0010333;GO:0016102;GO:0016740;GO:0046394;GO:0050559;	Terpenoids		Vc15p243.0	up	up	down	GO:0005773;GO:0009820;GO:0016020;GO:0016491;GO:0042179;GO:0071949;	Alkaloids		Vc12a116.38	normal	up	normal	GO:0006629;GO:0008374;GO:0016020;	Lipids
Vc13s341.30	normal	up	down	GO:0008171;GO:0008757;GO:0009809;GO:0032259;GO:0102822;	Flavonoids		Vc1429s0.4	normal	up	down	GO:0001676;GO:0003677;GO:0003881;GO:0004467;GO:0005524;GO:0005783;GO:0009698;GO:0016020;GO:0016207;GO:0106290;	Phenylpropanoids		Vc11p335.5	no	yes	yes	normal	up	down	GO:0001067;GO:0003690;GO:0003700;GO:0004553;GO:0005515;GO:0005634;GO:0005829;GO:0005975;GO:0006355;GO:0009410;GO:0009610;GO:0043565;GO:0080183;GO:1902680;	carbohydrate		Vc19p310.5	normal	up	down	GO:0009570;GO:0016121;GO:0016702;GO:0046872;	Terpenoids		Vc16a211.26	normal	up	down	GO:0009820;GO:0016020;GO:0016787;	Alkaloids		Vc12a255.24	normal	up	down	GO:0000035;GO:0000036;GO:0005739;GO:0006633;	Lipids
Vc14a186.29	normal	up	normal	GO:0000325;GO:0005774;GO:0010023;GO:0010162;GO:0015078;GO:0015297;GO:0022853;GO:0042910;GO:0097437;GO:1902600;GO:1990961;	Flavonoids		Vc1466a0.2	up	up	normal	GO:0009699;GO:0009806;GO:0016020;GO:0016491;	Phenylpropanoids		Vc11p90.11	no	yes	yes	normal	up	down	GO:0004553;GO:0005576;GO:0005829;GO:0005975;GO:0009057;GO:0009059;GO:0009505;GO:0009506;GO:0009536;GO:0016020;GO:0044036;	carbohydrate		Vc1a241.25	up	up	normal	GO:0004497;GO:0005506;GO:0016020;GO:0016114;GO:0016125;GO:0016134;GO:0016705;GO:0019742;GO:0020037;	Terpenoids		Vc16a352.18	down	up	down	GO:0004185;GO:0006508;GO:0009820;GO:0016020;GO:0016747;GO:0019748;	Alkaloids		Vc12a350.33	normal	up	down	GO:0004630;GO:0005509;GO:0016020;GO:0016042;GO:0044248;GO:0046434;GO:0046470;GO:0070290;GO:0071944;	Lipids
Vc14a212.26	up	up	normal	GO:0006633;GO:0009813;GO:0009922;GO:0016020;	Flavonoids		Vc149s2.68	up	up	normal	GO:0006720;GO:0008270;GO:0009809;GO:0016616;GO:0031320;	Phenylpropanoids		Vc11s279.31	yes	yes	yes	up	up	down	GO:0005975;GO:0006952;GO:0016020;GO:0042973;	carbohydrate		Vc1p398.3	down	up	down	GO:0009414;GO:0009535;GO:0009570;GO:0009687;GO:0016106;GO:0016121;GO:0016702;GO:0042538;GO:0043289;GO:0046872;GO:0072330;GO:0120255;GO:1902645;	Terpenoids		Vc16a366.33	normal	normal	up	GO:0004497;GO:0005506;GO:0016020;GO:0016114;GO:0016705;GO:0020037;GO:0033075;GO:0051762;	Alkaloids		Vc12s17.27	down	normal	down	GO:0003755;GO:0006629;GO:0016020;GO:0016717;GO:0045485;GO:0050183;GO:0072330;GO:0098827;GO:0102518;	Lipids
Vc14a326.39	normal	down	up	GO:0003676;GO:0004523;GO:0005737;GO:0008194;GO:0009813;GO:0016114;GO:0046527;	Flavonoids		Vc14a183.19	normal	down	up	GO:0008270;GO:0009809;GO:0016020;GO:0016616;GO:0031320;	Phenylpropanoids		Vc11s334.37	yes	no	yes	up	normal	up	GO:0001067;GO:0003690;GO:0003700;GO:0004553;GO:0005515;GO:0005634;GO:0005829;GO:0005975;GO:0006355;GO:0009410;GO:0016020;GO:0043565;GO:0080183;GO:1902680;	carbohydrate		Vc1s317.29	normal	down	up	GO:0008194;GO:0009813;GO:0016114;GO:0046148;GO:0046283;GO:0046527;	Terpenoids		Vc16s125.41	normal	normal	up	GO:0008171;GO:0008757;GO:0009809;GO:0009820;GO:0032259;	Alkaloids		Vc12s361.42	normal	normal	down	GO:0000981;GO:0003677;GO:0005634;GO:0006357;GO:0008289;GO:0016020;	Lipids
Vc14a46.20	up	up	normal	GO:0003854;GO:0006694;GO:0016621;GO:0045552;	Flavonoids		Vc14a252.26	down	normal	normal	GO:0009699;GO:0009806;GO:0016491;	Phenylpropanoids		Vc11s398.32	no	yes	yes	normal	down	up	GO:0004553;GO:0005576;GO:0005737;GO:0005975;GO:0016020;GO:0030488;	carbohydrate		Vc1s46.41	normal	up	down	GO:0003735;GO:0005840;GO:0006412;GO:0008661;GO:0009228;GO:0009536;GO:0015995;GO:0016020;GO:0016114;GO:0046872;GO:0052865;GO:1990904;	Terpenoids		Vc17a84.25	normal	normal	up	GO:0009820;GO:0016020;GO:0016740;GO:0016787;	Alkaloids		Vc12s48.26	up	up	normal	GO:0005576;GO:0006629;GO:0016020;GO:0016298;GO:1901575;	Lipids
Vc14s307.43	normal	down	up	GO:0005737;GO:0008194;GO:0009718;GO:0016020;GO:0046527;	Flavonoids		Vc14a278.15	up	up	normal	GO:0005507;GO:0016020;GO:0046274;GO:0048046;GO:0052716;	Phenylpropanoids		Vc126s3.69	yes	yes	yes	down	up	down	GO:0004565;GO:0005773;GO:0005975;GO:0009505;GO:0016020;GO:0030246;GO:0048046;	carbohydrate		Vc20a68.33	up	up	normal	GO:0008194;GO:0009813;GO:0016114;GO:0031542;GO:0046148;GO:0046283;GO:0046527;GO:0102360;GO:0102425;GO:0102454;GO:1901038;GO:1901806;	Terpenoids		Vc17s291.34	normal	up	down	GO:0004497;GO:0005506;GO:0016020;GO:0016705;GO:0020037;GO:0033075;	Alkaloids		Vc132p0.16	normal	normal	up	GO:0003746;GO:0003924;GO:0005525;GO:0005634;GO:0005829;GO:0005840;GO:0006397;GO:0006414;GO:0006629;GO:0008380;GO:0009536;GO:0016298;GO:0030623;GO:0120114;GO:1902494;GO:1990904;	Lipids
Vc14s354.49	down	up	down	GO:0005737;GO:0008194;GO:0009636;GO:0009801;GO:0009813;GO:0033494;GO:0046148;GO:0046278;GO:0046283;GO:0046527;	Flavonoids		Vc14a46.20	up	up	normal	GO:0003854;GO:0006694;GO:0016621;GO:0045552;	Phenylpropanoids		Vc12a10.30	yes	yes	yes	up	up	down	GO:0004568;GO:0005773;GO:0005975;GO:0006032;GO:0006952;GO:0008061;GO:0016998;	carbohydrate		Vc20a68.35	up	normal	normal	GO:0008194;GO:0009813;GO:0016114;GO:0031542;GO:0046148;GO:0046283;GO:0046527;GO:0102360;GO:0102425;GO:0102454;GO:1901038;GO:1901806;	Terpenoids		Vc18s44.37	down	up	down	GO:0004185;GO:0006508;GO:0009820;GO:0016020;GO:0016746;GO:0019748;	Alkaloids		Vc138a0.20	normal	up	normal	GO:0006633;GO:0009507;GO:0016020;GO:0016740;GO:0031177;GO:0044620;GO:0140414;	Lipids
Vc14s6.29	normal	down	up	GO:0008194;GO:0009813;GO:0046148;GO:0046283;GO:0046527;	Flavonoids		Vc14s140.24	normal	down	up	GO:0001676;GO:0004467;GO:0005783;GO:0009698;GO:0016020;GO:0016207;GO:0106290;	Phenylpropanoids		Vc12a12.37	yes	no	yes	down	normal	down	GO:0005975;GO:0009506;GO:0042973;	carbohydrate		Vc20s210.31	up	up	normal	GO:0005811;GO:0016020;GO:0016104;GO:0016866;	Terpenoids		Vc19a116.30	normal	normal	down	GO:0000139;GO:0005789;GO:0009820;GO:0010296;	Alkaloids		Vc13a286.23	normal	up	down	GO:0004310;GO:0005783;GO:0006644;GO:0006720;GO:0008610;GO:0009753;GO:0010287;GO:0016020;GO:0016767;GO:0031984;GO:0044249;GO:0046905;GO:0051996;GO:0090378;GO:0120251;	Lipids
Vc15a107.18	normal	up	down	GO:0000325;GO:0010023;GO:0010162;GO:0015078;GO:0015297;GO:0016020;GO:0022853;GO:0042910;GO:0097437;GO:1902600;GO:1990961;	Flavonoids		Vc14s354.49	down	up	down	GO:0005737;GO:0008194;GO:0009636;GO:0009801;GO:0009813;GO:0033494;GO:0046148;GO:0046278;GO:0046283;GO:0046527;	Phenylpropanoids		Vc12a215.16	no	yes	yes	normal	up	down	GO:0003825;GO:0004805;GO:0006817;GO:0008519;GO:0015145;GO:0015293;GO:0015749;GO:0016020;GO:0032440;GO:0050896;GO:0072488;	carbohydrate		Vc211a0.22	normal	down	up	GO:0004497;GO:0005506;GO:0016020;GO:0016114;GO:0016705;GO:0020037;GO:0033076;GO:0044550;GO:0051762;GO:1901566;	Terpenoids		Vc19a153.16	up	up	down	GO:0004620;GO:0004806;GO:0006629;GO:0009507;GO:0009820;GO:0047714;	Alkaloids		Vc13a392.27	normal	normal	up	GO:0004315;GO:0006633;	Lipids
Vc15a146.25	normal	up	down	GO:0003677;GO:0005634;GO:0009416;GO:0009718;GO:0015995;GO:0045893;	Flavonoids		Vc15a134.19	up	up	normal	GO:0005524;GO:0009723;GO:0009805;GO:0009836;GO:0015995;GO:0016746;GO:0016851;	Phenylpropanoids		Vc12a298.31	yes	yes	no	up	up	normal	GO:0004553;GO:0005576;GO:0005975;GO:0016020;GO:0061783;	carbohydrate		Vc21a13.24	up	up	normal	GO:0004497;GO:0005506;GO:0005739;GO:0009808;GO:0016020;GO:0016114;GO:0016705;GO:0020037;GO:0045548;GO:0051762;	Terpenoids		Vc19a17.33	normal	up	down	GO:0004806;GO:0005840;GO:0009820;GO:0016042;	Alkaloids		Vc13p215.14	normal	down	up	GO:0009791;GO:0012511;GO:0016020;GO:0048608;	Lipids
Vc15a348.41	up	up	normal	GO:0008194;GO:0009813;	Flavonoids		Vc15a272.36	up	up	up	GO:0004664;GO:0006558;GO:0009095;GO:0009570;GO:0047769;GO:1902223;	Phenylpropanoids		Vc12a37.34	yes	yes	no	up	up	normal	GO:0004568;GO:0005773;GO:0005975;GO:0006032;GO:0006952;GO:0008061;GO:0016998;	carbohydrate		Vc21p224.11	up	down	up	GO:0002238;GO:0005811;GO:0010038;GO:0016020;GO:0016104;GO:0016135;GO:0016829;GO:0016866;GO:0098827;GO:1902438;	Terpenoids		Vc19a286.27	normal	normal	down	GO:0004497;GO:0005506;GO:0005524;GO:0016020;GO:0016705;GO:0020037;GO:0033075;GO:0051762;	Alkaloids		Vc13p390.6	normal	down	up	GO:0005524;GO:0005739;GO:0005856;GO:0006744;GO:0008289;	Lipids
Vc16a381.32	normal	up	down	GO:0002238;GO:0004386;GO:0009805;GO:0009813;GO:0016491;GO:0031418;GO:0046872;	Flavonoids		Vc15a283.32	up	up	normal	GO:0005737;GO:0006558;GO:0009074;GO:0009800;GO:0045548;GO:1902222;	Phenylpropanoids		Vc12a382.41	no	yes	no	normal	up	normal	GO:0004568;GO:0005975;GO:0006032;GO:0008061;GO:0016020;GO:0016998;GO:0050832;	carbohydrate		Vc22a197.17	normal	down	up	GO:0004497;GO:0005506;GO:0006714;GO:0016020;GO:0016115;GO:0016125;GO:0016705;GO:0020037;GO:0032787;GO:0033076;GO:0043288;GO:0044550;GO:0046164;GO:0046395;GO:0051762;GO:0120254;GO:1901566;GO:1902644;	Terpenoids		Vc19a337.39	up	up	normal	GO:0009820;GO:0016020;GO:0016740;GO:0016787;	Alkaloids		Vc13p64.7	normal	down	up	GO:0009791;GO:0012511;GO:0016020;GO:0048608;	Lipids
Vc16p23.9	up	up	normal	GO:0005504;GO:0006631;GO:0009570;GO:0009813;GO:0016872;	Flavonoids		Vc15a294.29	normal	normal	down	GO:0000302;GO:0009408;GO:0009507;GO:0009793;GO:0009809;GO:0016688;GO:0016692;GO:0020037;GO:0034599;GO:0042744;GO:0046409;GO:0046872;GO:0098869;GO:0140825;	Phenylpropanoids		Vc12a390.20	no	no	yes	normal	normal	down	GO:0000272;GO:0004559;GO:0005634;GO:0005737;GO:0005839;GO:0006013;GO:0016020;GO:0030246;GO:0043632;GO:0046872;GO:0051603;	carbohydrate		Vc22a301.32	normal	down	up	GO:0004497;GO:0005506;GO:0009808;GO:0016020;GO:0016114;GO:0016705;GO:0020037;	Terpenoids		Vc19a63.31	up	up	normal	GO:0009820;GO:0016020;GO:0016298;	Alkaloids		Vc13p97.14	up	up	normal	GO:0005783;GO:0006633;GO:0009409;GO:0009416;GO:0009922;GO:0010025;GO:0016020;GO:0048868;GO:0090378;	Lipids
Vc17s232.19	normal	normal	down	GO:0005737;GO:0008194;GO:0009813;GO:0046527;	Flavonoids		Vc15a308.29	normal	up	down	GO:0006694;GO:0016020;GO:0016229;GO:0016616;GO:0016621;	Phenylpropanoids		Vc12a71.36	no	yes	no	normal	up	normal	GO:0008643;GO:0016020;	carbohydrate		Vc22a304.29	up	up	normal	GO:0004497;GO:0005506;GO:0016020;GO:0016114;GO:0016705;GO:0020037;GO:0098827;	Terpenoids		Vc19a68.52	normal	up	down	GO:0004185;GO:0005576;GO:0005773;GO:0006508;GO:0009820;GO:0016020;	Alkaloids		Vc13s37.54	normal	down	up	GO:0004630;GO:0005509;GO:0016020;GO:0016042;GO:0044248;GO:0046434;GO:0046470;GO:0070290;GO:0071944;	Lipids
Vc18a373.31	up	up	normal	GO:0005504;GO:0006631;GO:0009570;GO:0009813;GO:0016872;	Flavonoids		Vc15a315.27	up	up	normal	GO:0005576;GO:0005975;GO:0008422;GO:0016020;GO:0102483;	Phenylpropanoids		Vc12a92.40	yes	yes	no	up	up	normal	GO:0004556;GO:0005509;GO:0005975;GO:0016020;GO:1901575;	carbohydrate		Vc23a68.32	up	up	normal	GO:0004497;GO:0005506;GO:0016020;GO:0016114;GO:0016125;GO:0016135;GO:0016705;GO:0020037;	Terpenoids		Vc19p288.0	up	up	normal	GO:0005576;GO:0009820;GO:0016491;GO:0071949;	Alkaloids		Vc149a1.17	up	up	normal	GO:0005576;GO:0006629;GO:0016020;GO:0016788;GO:1901575;	Lipids
Vc18a76.26	normal	up	down	GO:0005737;GO:0008194;GO:0009813;GO:0046527;	Flavonoids		Vc15a315.28	normal	up	down	GO:0005509;GO:0005576;GO:0005975;GO:0008422;GO:0009057;GO:0102483;	Phenylpropanoids		Vc12a99.17	no	yes	yes	normal	up	down	GO:0016020;GO:0030246;GO:0098609;	carbohydrate		Vc23a68.33	up	up	normal	GO:0004497;GO:0005506;GO:0016020;GO:0016114;GO:0016125;GO:0016135;GO:0016705;GO:0020037;	Terpenoids		Vc19p289.3	up	up	normal	GO:0005773;GO:0009820;GO:0016020;GO:0016491;GO:0042179;GO:0071949;	Alkaloids		Vc14a174.42	normal	down	up	GO:0005829;GO:0006720;GO:0012511;GO:0016020;GO:0016491;GO:0050661;	Lipids
Vc18a76.29	normal	up	normal	GO:0005737;GO:0008194;GO:0009718;GO:0046527;	Flavonoids		Vc15a315.29	normal	up	down	GO:0005509;GO:0005576;GO:0005975;GO:0008422;GO:0009057;GO:0102483;	Phenylpropanoids		Vc12p12.12	yes	no	yes	down	normal	down	GO:0004553;GO:0005975;	carbohydrate		Vc23p364.3	normal	up	down	GO:0004420;GO:0005777;GO:0005789;GO:0006722;GO:0008299;GO:0009646;GO:0009753;GO:0015936;GO:0016126;GO:0016135;GO:0031903;GO:0031969;	Terpenoids		Vc20a101.22	up	up	normal	GO:0004497;GO:0005506;GO:0016020;GO:0016705;GO:0020037;GO:0033075;	Alkaloids		Vc14a178.26	normal	up	down	GO:0005737;GO:0007049;GO:0008289;GO:0016020;GO:0051301;	Lipids
Vc18s75.37	normal	up	down	GO:0003904;GO:0004672;GO:0005634;GO:0005737;GO:0006139;GO:0006796;GO:0006950;GO:0007623;GO:0009266;GO:0009415;GO:0009582;GO:0009605;GO:0009640;GO:0009644;GO:0009646;GO:0009648;GO:0009785;GO:0009882;GO:0010075;GO:0010114;GO:0010117;GO:0010118;GO:0010218;GO:0010244;GO:0010310;GO:0010468;GO:0012501;GO:0019637;GO:0036094;GO:0042726;GO:0042752;GO:0042803;GO:0043168;GO:0044281;GO:0046283;GO:0051480;GO:…	Flavonoids		Vc15p117.19	normal	normal	down	GO:0002238;GO:0008168;GO:0009805;GO:0016491;GO:0031418;GO:0032259;GO:0046872;	Phenylpropanoids		Vc12p382.8	yes	yes	yes	up	up	down	GO:0004568;GO:0005576;GO:0005975;GO:0006032;GO:0006952;GO:0008061;GO:0009620;GO:0016998;	carbohydrate		Vc23s87.18	up	up	normal	GO:0005789;GO:0005811;GO:0005992;GO:0016104;GO:0031559;	Terpenoids		Vc20a18.30	normal	normal	down	GO:0005840;GO:0009820;GO:0016042;GO:0016787;	Alkaloids		Vc14a212.26	up	up	normal	GO:0006633;GO:0009813;GO:0009922;GO:0016020;	Lipids
Vc19a237.25	normal	up	down	GO:0003677;GO:0005634;GO:0009416;GO:0009718;GO:0015995;GO:0045893;	Flavonoids		Vc15s190.29	normal	up	normal	GO:0002238;GO:0009685;GO:0009805;GO:0016706;GO:0031418;GO:0046872;	Phenylpropanoids		Vc12s128.53	no	yes	yes	normal	up	down	GO:0005351;GO:0005773;GO:0005801;GO:0005886;GO:0005985;GO:0006817;GO:0008515;GO:0015770;GO:0050896;GO:0055085;	carbohydrate		Vc24a160.31	normal	up	down	GO:0005829;GO:0006561;GO:0009408;GO:0009414;GO:0009507;GO:0009687;GO:0009750;GO:0010115;GO:0016106;GO:0016616;GO:0042802;GO:0043289;GO:0072330;GO:0120255;GO:1902645;	Terpenoids		Vc20a374.29	up	up	normal	GO:0009820;GO:0016020;GO:0016787;	Alkaloids		Vc14a256.29	normal	down	up	GO:0005783;GO:0006633;GO:0009409;GO:0009416;GO:0009922;GO:0010025;GO:0016020;GO:0016491;GO:0016829;GO:0048868;GO:0090378;	Lipids
Vc19a256.19	normal	down	up	GO:0009813;GO:0016616;GO:0033729;GO:0050589;	Flavonoids		Vc15s205.28	down	up	down	GO:0002238;GO:0009692;GO:0009805;GO:0009815;GO:0009835;GO:0016706;GO:0031418;GO:0043450;GO:0046872;	Phenylpropanoids		Vc12s353.27	no	yes	yes	normal	up	down	GO:0003677;GO:0003899;GO:0005975;GO:0006351;GO:0006952;GO:0016020;GO:0042973;	carbohydrate		Vc24a26.32	normal	up	down	GO:0000287;GO:0009507;GO:0009685;GO:0009905;GO:0010333;GO:0016102;GO:0016747;GO:0046394;GO:0050559;	Terpenoids		Vc20a66.37	up	up	normal	GO:0009820;GO:0016020;GO:0016298;	Alkaloids		Vc14a275.23	up	normal	up	GO:0006633;GO:0009922;GO:0016020;	Lipids
Vc19p4.6	up	up	normal	GO:0008757;GO:0009813;GO:0019438;GO:0032259;GO:0046983;GO:0047763;	Flavonoids		Vc15s208.30	normal	up	down	GO:0004334;GO:0006558;GO:0006572;GO:0046872;GO:0051087;GO:1902000;GO:1902222;	Phenylpropanoids		Vc1326a0.7	yes	no	yes	up	normal	up	GO:0005829;GO:0005975;GO:0006116;GO:0009331;GO:0046168;GO:0047952;GO:0051287;	carbohydrate		Vc24a58.38	up	up	normal	GO:0004497;GO:0005506;GO:0005634;GO:0006721;GO:0008299;GO:0009808;GO:0016020;GO:0016705;GO:0016874;GO:0020037;GO:0045548;GO:0051761;GO:0120251;	Terpenoids		Vc20a72.59	normal	up	down	GO:0004185;GO:0005576;GO:0005773;GO:0005829;GO:0006508;GO:0009820;GO:0016020;GO:0090377;GO:0090378;	Alkaloids		Vc14a289.25	normal	up	down	GO:0000166;GO:0003878;GO:0005829;GO:0006099;GO:0006629;GO:0016829;GO:0016874;GO:0035639;GO:0097367;	Lipids
Vc1a316.27	up	normal	up	GO:0008194;GO:0009813;GO:0046148;GO:0046283;GO:0046527;	Flavonoids		Vc160a2.34	normal	up	normal	GO:0005524;GO:0005737;GO:0007623;GO:0009698;GO:0010597;GO:0016207;GO:0016491;GO:0018858;GO:0019438;GO:0033494;GO:0042537;GO:0050563;GO:0052315;GO:0072330;GO:0106286;GO:0106290;GO:0120255;GO:1901362;	Phenylpropanoids		Vc133a2.18	yes	yes	no	up	up	normal	GO:0004674;GO:0004713;GO:0005524;GO:0016020;GO:0016310;GO:0030246;GO:0048544;GO:0051707;GO:0071944;GO:0106310;	carbohydrate		Vc24p122.11	normal	up	down	GO:0009414;GO:0009570;GO:0009687;GO:0009737;GO:0016106;GO:0016121;GO:0016702;GO:0043289;GO:0046872;GO:0072330;GO:0120255;GO:1902645;	Terpenoids		Vc20s251.35	normal	normal	down	GO:0006508;GO:0008236;GO:0009820;GO:0016020;	Alkaloids		Vc14a323.38	normal	up	normal	GO:0005886;GO:0006869;GO:0008289;GO:0098552;	Lipids
Vc1a318.41	up	normal	up	GO:0008194;GO:0009813;	Flavonoids		Vc16a381.32	normal	up	down	GO:0002238;GO:0004386;GO:0009805;GO:0009813;GO:0016491;GO:0031418;GO:0046872;	Phenylpropanoids		Vc13a252.24	no	yes	yes	normal	up	down	GO:0005459;GO:0005460;GO:0008643;GO:0009553;GO:0009555;GO:0015297;GO:0015711;GO:0015931;GO:0016020;GO:0030968;GO:0055085;GO:0098827;GO:1901264;	carbohydrate		Vc25s105.21	normal	normal	down	GO:0003676;GO:0004497;GO:0005506;GO:0008270;GO:0016020;GO:0016114;GO:0016702;GO:0016705;GO:0020037;GO:0051762;	Terpenoids		Vc211a0.22	normal	down	up	GO:0004497;GO:0005506;GO:0016020;GO:0016114;GO:0016705;GO:0020037;GO:0033076;GO:0044550;GO:0051762;GO:1901566;	Alkaloids		Vc14a372.30	normal	down	up	GO:0006633;GO:0009922;GO:0016020;	Lipids
Vc1a373.37	normal	up	down	GO:0004497;GO:0005506;GO:0005783;GO:0009805;GO:0009809;GO:0009813;GO:0016020;GO:0016705;GO:0020037;GO:0042802;	Flavonoids		Vc16a391.42	normal	normal	down	GO:0005737;GO:0008756;GO:0009698;GO:0016207;GO:0016757;GO:0043231;	Phenylpropanoids		Vc13a268.27	yes	yes	no	up	up	normal	GO:0005351;GO:0006817;GO:0016020;GO:0032440;GO:0034219;GO:0050896;GO:1902600;	carbohydrate		Vc25s25.33	up	up	normal	GO:0004497;GO:0005506;GO:0006714;GO:0009414;GO:0009737;GO:0009835;GO:0016020;GO:0016115;GO:0016125;GO:0016705;GO:0020037;GO:0032787;GO:0043288;GO:0046164;GO:0046395;GO:0051762;GO:0120254;GO:1902644;	Terpenoids		Vc211a0.23	normal	down	up	GO:0004497;GO:0005506;GO:0016020;GO:0016705;GO:0020037;GO:0033076;GO:0042617;GO:0044550;GO:0051762;GO:1901566;	Alkaloids		Vc14p208.7	down	normal	down	GO:0005504;GO:0009627;GO:0016020;	Lipids
Vc1p272.1	normal	up	down	GO:0008194;GO:0009813;	Flavonoids		Vc16p232.2	normal	up	down	GO:0004106;GO:0005829;GO:0006558;GO:0006570;GO:0008652;GO:0009073;GO:0042803;GO:0043650;GO:0046417;GO:1901745;	Phenylpropanoids		Vc13a314.25	yes	no	yes	down	normal	down	GO:0004568;GO:0005576;GO:0005773;GO:0005975;GO:0006032;GO:0006952;GO:0008061;GO:0009620;GO:0016998;	carbohydrate		Vc26a277.21	normal	down	normal	GO:0009507;GO:0016109;GO:0016116;GO:0016491;GO:0042170;GO:0046148;GO:0046608;GO:0050660;	Terpenoids		Vc21a6.39	normal	up	down	GO:0005737;GO:0009409;GO:0009733;GO:0009737;GO:0009751;GO:0009753;GO:0009820;GO:0016020;GO:0016787;GO:0046872;GO:0060918;GO:2000012;	Alkaloids		Vc14p384.7	normal	down	up	GO:0003723;GO:0006629;GO:0008081;GO:0008270;GO:0009451;	Lipids
Vc1s317.29	normal	down	up	GO:0008194;GO:0009813;GO:0016114;GO:0046148;GO:0046283;GO:0046527;	Flavonoids		Vc16s125.41	normal	normal	up	GO:0008171;GO:0008757;GO:0009809;GO:0009820;GO:0032259;	Phenylpropanoids		Vc13a318.39	no	no	yes	normal	normal	down	GO:0006817;GO:0008643;GO:0016020;GO:0022857;GO:0032440;GO:0050896;GO:0055085;	carbohydrate		Vc26p234.1	normal	up	down	GO:0005783;GO:0008194;GO:0009628;GO:0009813;GO:0016020;GO:0016114;GO:0016131;GO:0016134;GO:0033554;GO:0046148;GO:0046283;GO:0046527;GO:0070887;GO:0098754;	Terpenoids		Vc21p326.1	up	up	normal	GO:0002933;GO:0004497;GO:0005506;GO:0009820;GO:0016020;GO:0016705;GO:0020037;GO:0048653;GO:0051213;GO:0051792;GO:0080110;	Alkaloids		Vc14p384.8	normal	up	down	GO:0004436;GO:0004620;GO:0006629;GO:0008081;	Lipids
Vc200s1.44	normal	down	up	GO:0005737;GO:0006721;GO:0008194;GO:0008299;GO:0009813;GO:0016020;GO:0046148;GO:0046283;GO:0046527;	Flavonoids		Vc17a235.23	normal	up	down	GO:0008171;GO:0008757;GO:0009809;GO:0032259;GO:0046872;	Phenylpropanoids		Vc13a332.32	no	no	yes	normal	normal	down	GO:0001678;GO:0004396;GO:0005524;GO:0005536;GO:0005739;GO:0005829;GO:0006096;GO:0009507;GO:0016020;GO:0019318;GO:0046835;GO:0051156;	carbohydrate		Vc26s130.36	up	up	normal	GO:0004497;GO:0005506;GO:0006950;GO:0009911;GO:0010224;GO:0010268;GO:0010584;GO:0016020;GO:0016114;GO:0016125;GO:0016132;GO:0016705;GO:0020037;GO:0048657;	Terpenoids		Vc22a109.15	up	normal	up	GO:0006629;GO:0009820;GO:0016787;	Alkaloids		Vc14p42.4	up	normal	up	GO:0000981;GO:0003677;GO:0005634;GO:0006357;GO:0008289;	Lipids
Vc20a45.21	normal	up	down	GO:0005634;GO:0005829;GO:0008194;GO:0009813;GO:0016020;GO:0046148;GO:0046283;GO:0046527;GO:0102970;GO:1900994;	Flavonoids		Vc17a300.24	normal	up	normal	GO:0005737;GO:0009698;GO:0016020;GO:0016405;GO:0016491;GO:0016878;	Phenylpropanoids		Vc13a355.23	no	yes	yes	normal	up	down	GO:0004565;GO:0005773;GO:0005975;GO:0016020;GO:0030246;GO:0048046;	carbohydrate		Vc28a290.34	up	up	down	GO:0008194;GO:0009813;GO:0016114;GO:0031542;GO:0046148;GO:0046283;GO:0046527;GO:0102360;GO:0102425;GO:0102454;GO:1901038;GO:1901806;	Terpenoids		Vc22a197.17	normal	down	up	GO:0004497;GO:0005506;GO:0006714;GO:0016020;GO:0016115;GO:0016125;GO:0016705;GO:0020037;GO:0032787;GO:0033076;GO:0043288;GO:0044550;GO:0046164;GO:0046395;GO:0051762;GO:0120254;GO:1901566;GO:1902644;	Alkaloids		Vc14s111.28	normal	up	down	GO:0006629;GO:0009820;GO:0016020;	Lipids
Vc20a47.45	normal	up	down	GO:0005737;GO:0008194;GO:0009813;GO:0046527;	Flavonoids		Vc17p323.0	up	up	down	GO:0005524;GO:0005737;GO:0008270;GO:0009611;GO:0009698;GO:0009753;GO:0016207;GO:0016740;GO:0050563;GO:0106286;GO:0106290;	Phenylpropanoids		Vc13a7.23	no	yes	yes	normal	up	down	GO:0005355;GO:0005459;GO:0005794;GO:0008643;GO:0015297;GO:0016020;GO:0071944;GO:0072334;	carbohydrate		Vc28p309.2	normal	normal	down	GO:0000287;GO:0005737;GO:0008194;GO:0009813;GO:0016114;GO:0030976;GO:0046148;GO:0046283;GO:0046527;GO:0102970;	Terpenoids		Vc22a239.22	normal	up	down	GO:0009820;GO:0016787;GO:0140096;	Alkaloids		Vc151p2.37	normal	down	up	GO:0005737;GO:0007049;GO:0008289;GO:0016020;GO:0051301;GO:0071365;GO:1901703;	Lipids
Vc20a5.31	up	up	up	GO:0008171;GO:0008757;GO:0009809;GO:0009813;GO:0032259;GO:0046983;GO:0102084;GO:0102938;	Flavonoids		Vc17p329.4	up	up	normal	GO:0005737;GO:0009723;GO:0009809;GO:0009836;GO:0009963;GO:0016020;GO:0047172;GO:0047205;	Phenylpropanoids		Vc13a98.30	no	yes	yes	normal	down	up	GO:0004476;GO:0005829;GO:0005975;GO:0008270;GO:0009298;GO:0009646;GO:0009744;GO:0010043;GO:0033591;GO:0042364;GO:0046394;GO:0046680;GO:0046686;GO:1901336;	carbohydrate		Vc28s139.28	up	up	normal	GO:0002238;GO:0005811;GO:0010038;GO:0016020;GO:0016104;GO:0016135;GO:0016829;GO:0016866;GO:0098827;GO:1902438;	Terpenoids		Vc22a7.22	normal	down	up	GO:0006629;GO:0008970;GO:0009820;GO:0016020;GO:0047714;GO:0102549;	Alkaloids		Vc15a192.30	normal	down	up	GO:0000981;GO:0003677;GO:0005634;GO:0006357;GO:0008289;	Lipids
Vc20a68.33	up	up	normal	GO:0008194;GO:0009813;GO:0016114;GO:0031542;GO:0046148;GO:0046283;GO:0046527;GO:0102360;GO:0102425;GO:0102454;GO:1901038;GO:1901806;	Flavonoids		Vc17p348.4	normal	up	down	GO:0080037;GO:2000762;	Phenylpropanoids		Vc13p40.9	no	yes	yes	normal	up	down	GO:0004571;GO:0005509;GO:0005737;GO:0005975;GO:0012505;GO:0016020;GO:0043231;	carbohydrate		Vc29a7.44	up	up	normal	GO:0004497;GO:0005506;GO:0009808;GO:0016020;GO:0016114;GO:0016705;GO:0020037;GO:0045548;GO:0051762;	Terpenoids		Vc22p160.2	up	up	normal	GO:0004620;GO:0006629;GO:0009820;GO:0052689;	Alkaloids		Vc15a311.31	normal	up	normal	GO:0004435;GO:0005886;GO:0016042;GO:0035556;GO:0051209;	Lipids
Vc20a68.35	up	normal	normal	GO:0008194;GO:0009813;GO:0016114;GO:0031542;GO:0046148;GO:0046283;GO:0046527;GO:0102360;GO:0102425;GO:0102454;GO:1901038;GO:1901806;	Flavonoids		Vc17s123.33	normal	up	down	GO:0005576;GO:0008422;GO:0009044;GO:0016020;GO:0031222;GO:0045493;GO:0046556;GO:0102483;	Phenylpropanoids		Vc13s269.25	yes	no	yes	down	normal	down	GO:0005351;GO:0006817;GO:0016020;GO:0032440;GO:0034219;GO:0050896;GO:1902600;	carbohydrate		Vc29p50.1	normal	normal	up	GO:0003676;GO:0005737;GO:0006807;GO:0008168;GO:0008194;GO:0009813;GO:0016114;GO:0043414;GO:0046148;GO:0046283;GO:0046527;GO:0102890;GO:0102891;	Terpenoids		Vc22s33.65	normal	up	down	GO:0004197;GO:0004497;GO:0005506;GO:0006508;GO:0016020;GO:0016705;GO:0020037;GO:0033075;	Alkaloids		Vc15a348.38	up	up	down	GO:0016020;GO:0016491;GO:0020037;GO:0042761;GO:0043231;GO:0043447;GO:0046872;	Lipids
Vc20a68.36	normal	up	down	GO:0008194;GO:0009813;	Flavonoids		Vc17s19.29	up	up	normal	GO:0005507;GO:0016020;GO:0046274;GO:0048046;GO:0052716;	Phenylpropanoids		Vc13s77.45	no	yes	yes	normal	up	down	GO:0004674;GO:0005524;GO:0016020;GO:0016310;GO:0030246;	carbohydrate		Vc29s127.41	up	up	normal	GO:0004497;GO:0005506;GO:0006950;GO:0009911;GO:0010224;GO:0010268;GO:0010584;GO:0016020;GO:0016114;GO:0016125;GO:0016132;GO:0016705;GO:0020037;GO:0048657;	Terpenoids		Vc23a323.23	normal	down	up	GO:0004392;GO:0005789;GO:0006788;GO:0009820;GO:0015031;GO:0016787;	Alkaloids		Vc15a58.22	up	up	normal	GO:0004620;GO:0004806;GO:0006629;GO:0009507;GO:0009820;GO:0047714;	Lipids
Vc21a108.29	up	up	down	GO:0009813;GO:0016746;GO:0016872;	Flavonoids		Vc17s293.34	up	up	normal	GO:0006694;GO:0016229;GO:0016616;GO:0016621;	Phenylpropanoids		Vc13s83.32	no	yes	yes	normal	up	down	GO:0004034;GO:0016020;GO:0019318;GO:0030246;GO:0046365;	carbohydrate		Vc29s213.42	up	normal	up	GO:0002238;GO:0005811;GO:0010038;GO:0016020;GO:0016104;GO:0016135;GO:0016829;GO:0016866;GO:0098827;GO:1902438;	Terpenoids		Vc23a330.25	up	up	normal	GO:0004497;GO:0005506;GO:0016020;GO:0016705;GO:0020037;GO:0033076;GO:0044550;GO:1901566;	Alkaloids		Vc15a60.24	up	up	up	GO:0006633;GO:0009922;GO:0016020;GO:0090377;	Lipids
Vc21a112.20	up	up	normal	GO:0005576;GO:0005773;GO:0006979;GO:0009505;GO:0009809;GO:0010089;GO:0016020;GO:0020037;GO:0031328;GO:0042744;GO:0046872;GO:0098869;GO:0140825;GO:1900378;GO:1901428;	Flavonoids		Vc17s335.37	normal	up	normal	GO:0016616;GO:0016621;	Phenylpropanoids		Vc13s98.35	no	no	yes	normal	normal	up	GO:0006812;GO:0006817;GO:0008643;GO:0016020;GO:0022857;GO:0055085;	carbohydrate		Vc2p78.0	normal	down	up	GO:0009535;GO:0009570;GO:0010114;GO:0010162;GO:0016121;GO:0016702;GO:0046872;	Terpenoids		Vc23p322.7	normal	up	normal	GO:0009820;GO:0016020;GO:0016787;GO:0033987;	Alkaloids		Vc15s330.54	normal	up	down	GO:0005576;GO:0006457;GO:0015977;GO:0015979;GO:0016020;GO:0017040;GO:0042759;GO:0044183;GO:0046512;GO:0046514;GO:0102121;GO:0110102;	Lipids
Vc21a112.21	up	up	normal	GO:0005576;GO:0005773;GO:0006979;GO:0009505;GO:0009809;GO:0010089;GO:0016020;GO:0020037;GO:0031328;GO:0042744;GO:0046872;GO:0098869;GO:0140825;GO:1900378;GO:1901428;	Flavonoids		Vc17s337.47	normal	down	up	GO:0002238;GO:0009805;GO:0016705;GO:0046872;GO:0051213;	Phenylpropanoids		Vc146a2.57	no	yes	yes	normal	up	down	GO:0005768;GO:0005794;GO:0008643;GO:0015297;GO:0016020;GO:0031984;GO:0055085;GO:0071944;	carbohydrate		Vc302a0.32	up	up	normal	GO:0004497;GO:0005506;GO:0009808;GO:0016020;GO:0016114;GO:0016705;GO:0020037;GO:0045548;GO:0051762;	Terpenoids		Vc23s327.43	normal	down	up	GO:0004497;GO:0005506;GO:0016020;GO:0016705;GO:0020037;GO:0033075;	Alkaloids		Vc16a105.25	normal	up	down	GO:0005506;GO:0008610;GO:0016020;GO:0016125;GO:0016491;GO:1901362;GO:1901617;	Lipids
Vc21a123.22	normal	normal	down	GO:0002238;GO:0008168;GO:0009805;GO:0016705;GO:0032259;GO:0046872;GO:0051213;GO:0051555;GO:0120091;GO:2000022;	Flavonoids		Vc17s360.29	up	up	normal	GO:0008152;GO:0008422;GO:0016020;GO:0016719;GO:0016788;GO:0052886;GO:0052887;GO:0102483;	Phenylpropanoids		Vc148s1.45	no	yes	yes	normal	down	up	GO:0005975;GO:0009536;GO:0019156;GO:0043033;GO:0043170;GO:0044249;GO:1901137;GO:1901575;	carbohydrate		Vc30p264.5	up	normal	up	GO:0003755;GO:0004497;GO:0005506;GO:0016020;GO:0016114;GO:0016705;GO:0020037;GO:0051762;	Terpenoids		Vc24a138.40	normal	up	down	GO:0009820;GO:0016020;GO:0016298;	Alkaloids		Vc16a182.29	up	normal	normal	GO:0005773;GO:0006952;GO:0016020;GO:0016042;GO:0016298;GO:0016740;GO:0045735;GO:0052689;	Lipids
Vc21p238.1	normal	up	down	GO:0005783;GO:0008194;GO:0009628;GO:0009813;GO:0016020;GO:0016131;GO:0016134;GO:0033554;GO:0046527;GO:0070887;GO:0098754;	Flavonoids		Vc18p273.2	normal	up	normal	GO:0005524;GO:0005576;GO:0005773;GO:0006457;GO:0008422;GO:0009044;GO:0016020;GO:0031222;GO:0045493;GO:0046556;GO:0102483;GO:0140662;	Phenylpropanoids		Vc14a163.42	no	yes	yes	normal	down	up	GO:0005789;GO:0005886;GO:0034219;GO:0051119;GO:0051260;	carbohydrate		Vc30p264.6	up	normal	up	GO:0003755;GO:0004497;GO:0005506;GO:0006721;GO:0008299;GO:0016020;GO:0016705;GO:0020037;GO:0051761;GO:0120251;	Terpenoids		Vc24a326.22	up	up	normal	GO:0004620;GO:0004806;GO:0006629;GO:0009507;GO:0009820;GO:0047714;	Alkaloids		Vc16a279.23	normal	normal	down	GO:0005737;GO:0006633;GO:0016702;GO:0031408;GO:0034440;GO:0046872;	Lipids
Vc21p49.17	normal	up	down	GO:0008194;GO:0009813;GO:0016020;GO:0046148;GO:0046283;GO:0046527;	Flavonoids		Vc18s72.38	normal	up	down	GO:0005576;GO:0008422;GO:0009044;GO:0016020;GO:0031222;GO:0045493;GO:0046556;GO:0102483;	Phenylpropanoids		Vc14a255.30	yes	no	yes	up	normal	up	GO:0004553;GO:0005975;GO:0016020;GO:0030246;	carbohydrate		Vc32a98.23	normal	up	down	GO:0002238;GO:0004310;GO:0005783;GO:0006722;GO:0008610;GO:0009723;GO:0009751;GO:0009753;GO:0016125;GO:0016135;GO:0031090;GO:0031984;GO:0042175;GO:0042542;GO:0044249;GO:0045338;GO:0046872;GO:0051996;GO:0071731;GO:1901362;GO:1901617;GO:1902438;	Terpenoids		Vc24a95.32	up	up	down	GO:0009820;GO:0016020;GO:0016740;GO:0016787;	Alkaloids		Vc16a319.17	normal	up	down	GO:0003989;GO:0005524;GO:0006633;GO:0009507;GO:0016740;GO:0046872;GO:2001295;	Lipids
Vc22a131.24	up	up	normal	GO:0002238;GO:0007033;GO:0009611;GO:0009718;GO:0009753;GO:0009805;GO:0010023;GO:0016705;GO:0031418;GO:0046872;GO:0051213;	Flavonoids		Vc191s1.61	normal	up	down	GO:0002238;GO:0009692;GO:0009805;GO:0009815;GO:0009835;GO:0016706;GO:0031418;GO:0043450;GO:0046872;	Phenylpropanoids		Vc14a274.20	no	yes	yes	normal	up	down	GO:0004252;GO:0005355;GO:0005459;GO:0005794;GO:0006508;GO:0008643;GO:0015297;GO:0016020;GO:0071944;GO:0072334;	carbohydrate		Vc33a131.36	up	normal	up	GO:0002238;GO:0005811;GO:0010038;GO:0016020;GO:0016104;GO:0016135;GO:0016829;GO:0016866;GO:0098827;GO:1902438;	Terpenoids		Vc24p146.0	normal	up	normal	GO:0005773;GO:0009820;GO:0016020;GO:0016491;GO:0042179;GO:0071949;	Alkaloids		Vc16p23.9	up	up	normal	GO:0005504;GO:0006631;GO:0009570;GO:0009813;GO:0016872;	Lipids
Vc22p189.5	normal	up	down	GO:0008194;GO:0008299;GO:0009813;GO:0046148;GO:0046283;GO:0046527;	Flavonoids		Vc19a320.28	up	up	normal	GO:0004664;GO:0006558;GO:0009095;GO:0009570;GO:0047769;GO:1902223;	Phenylpropanoids		Vc14a352.33	no	yes	yes	normal	down	up	GO:0004560;GO:0005975;GO:0016020;	carbohydrate		Vc33p307.8	up	up	normal	GO:0004497;GO:0005506;GO:0009808;GO:0016020;GO:0016114;GO:0016705;GO:0020037;GO:0045548;GO:0051762;	Terpenoids		Vc26a205.20	up	normal	normal	GO:0004497;GO:0005506;GO:0016020;GO:0016705;GO:0020037;GO:0033075;	Alkaloids		Vc16s40.47	up	normal	normal	GO:0004601;GO:0006633;GO:0006979;GO:0020037;GO:0031408;GO:0046872;GO:0051213;GO:0098869;	Lipids
Vc23a248.45	normal	normal	down	GO:0005737;GO:0008194;GO:0009813;GO:0046148;GO:0046283;GO:0046527;	Flavonoids		Vc19a331.32	up	up	normal	GO:0005737;GO:0006558;GO:0009074;GO:0009800;GO:0043621;GO:0045548;GO:1902222;	Phenylpropanoids		Vc14a377.25	yes	yes	yes	down	up	down	GO:0004565;GO:0005773;GO:0005975;GO:0030246;GO:0048046;	carbohydrate		Vc33s210.34	up	up	normal	GO:0004497;GO:0005506;GO:0006950;GO:0009911;GO:0010224;GO:0010268;GO:0010584;GO:0016020;GO:0016114;GO:0016125;GO:0016132;GO:0016705;GO:0020037;GO:0048657;	Terpenoids		Vc26a4.25	normal	normal	down	GO:0005515;GO:0005737;GO:0009409;GO:0009733;GO:0009737;GO:0009751;GO:0009753;GO:0009820;GO:0016020;GO:0016787;GO:0046872;GO:0060918;GO:2000012;	Alkaloids		Vc16s83.25	up	up	normal	GO:0006629;GO:0008081;GO:0016020;	Lipids
Vc23a338.19	normal	down	up	GO:0008194;GO:0009813;GO:0046527;	Flavonoids		Vc19a366.36	normal	up	down	GO:0006694;GO:0016020;GO:0016229;GO:0016616;GO:0016621;	Phenylpropanoids		Vc14a385.20	no	yes	yes	normal	up	down	GO:0005975;GO:0016020;GO:0016998;GO:0031176;	carbohydrate		Vc35a89.23	normal	up	down	GO:0000287;GO:0007623;GO:0009570;GO:0010333;GO:0016102;GO:0034007;GO:0034768;GO:0102701;	Terpenoids		Vc26s79.34	normal	down	up	GO:0004601;GO:0006488;GO:0009820;GO:0016020;GO:0016787;GO:0016829;GO:0098869;	Alkaloids		Vc17a17.17	normal	up	down	GO:0003735;GO:0005576;GO:0005840;GO:0006412;GO:0016020;GO:0017040;GO:0042759;GO:0046512;GO:0046514;GO:0102121;GO:1990904;	Lipids
Vc23p140.8	normal	up	down	GO:0006777;GO:0008194;GO:0009813;	Flavonoids		Vc19s360.31	normal	up	down	GO:0005509;GO:0005576;GO:0005975;GO:0008422;GO:0009057;GO:0102483;	Phenylpropanoids		Vc14a76.19	no	yes	yes	normal	up	down	GO:0000138;GO:0005515;GO:0005768;GO:0005802;GO:0005975;GO:0016020;GO:0033481;GO:0050378;GO:0050829;GO:0050832;GO:1901566;	carbohydrate		Vc35s201.18	up	up	normal	GO:0000166;GO:0003878;GO:0005829;GO:0006099;GO:0006633;GO:0009911;GO:0010025;GO:0015995;GO:0016109;GO:0016116;GO:0016829;GO:0019252;GO:0035639;GO:0043481;GO:0045793;GO:0045995;GO:0048366;GO:0097367;GO:0140615;	Terpenoids		Vc27a47.30	normal	normal	up	GO:0009820;GO:0016020;GO:0016740;GO:0016787;	Alkaloids		Vc17a174.19	normal	down	normal	GO:0004630;GO:0005886;GO:0006654;GO:0016042;GO:0044248;GO:0046434;GO:0070290;	Lipids
Vc23p90.4	normal	down	up	GO:0008194;GO:0009636;GO:0009809;GO:0009813;GO:0016020;GO:0042178;GO:0046148;GO:0046283;GO:0046527;	Flavonoids		Vc1a185.22	up	up	normal	GO:0005737;GO:0006558;GO:0009074;GO:0009800;GO:0032991;GO:0045548;GO:1902222;	Phenylpropanoids		Vc14a79.31	no	yes	yes	normal	up	down	GO:0000138;GO:0005515;GO:0005768;GO:0005802;GO:0005975;GO:0016020;GO:0033481;GO:0050378;GO:0050829;GO:0050832;GO:1901566;	carbohydrate		Vc35s263.41	up	up	normal	GO:0003735;GO:0005840;GO:0006412;GO:0008654;GO:0009507;GO:0010189;GO:0015979;GO:0015995;GO:0016114;GO:0033385;GO:0033519;GO:0045550;GO:0071949;GO:0102067;GO:1990904;	Terpenoids		Vc28a286.24	normal	up	down	GO:0004185;GO:0005576;GO:0005773;GO:0005829;GO:0006508;GO:0009820;GO:0016020;GO:0090377;GO:0090378;	Alkaloids		Vc17a308.25	normal	down	up	GO:0004303;GO:0004316;GO:0005811;GO:0005829;GO:0008202;GO:0008610;GO:0009507;GO:0016020;GO:0070523;GO:0070524;GO:0072582;GO:0102196;GO:1901362;	Lipids
Vc24a227.11	normal	normal	down	GO:0003677;GO:0005634;GO:0009416;GO:0009718;GO:0015995;GO:0045893;	Flavonoids		Vc1a186.19	up	up	normal	GO:0005737;GO:0006558;GO:0009074;GO:0009800;GO:0016597;GO:0032991;GO:0045548;GO:1902222;	Phenylpropanoids		Vc14p124.11	no	yes	yes	normal	up	down	GO:0004674;GO:0005524;GO:0005886;GO:0016310;GO:0030246;GO:0050832;	carbohydrate		Vc35s90.60	normal	down	up	GO:0000287;GO:0009507;GO:0009532;GO:0009685;GO:0010333;GO:0016020;GO:0016102;GO:0016740;GO:0046394;	Terpenoids		Vc28a292.36	up	up	normal	GO:0009820;GO:0016020;GO:0016298;	Alkaloids		Vc17a308.26	normal	down	up	GO:0005811;GO:0005829;GO:0008202;GO:0008610;GO:0009507;GO:0016020;GO:0016491;GO:1901362;	Lipids
Vc24a46.35	up	up	normal	GO:0008194;GO:0009813;	Flavonoids		Vc1a187.25	up	up	normal	GO:0005737;GO:0006558;GO:0009074;GO:0009800;GO:0032991;GO:0045548;GO:1902222;	Phenylpropanoids		Vc14s141.21	no	no	yes	normal	normal	down	GO:0005457;GO:0005459;GO:0005460;GO:0005794;GO:0008643;GO:0015297;GO:0015783;GO:0015786;GO:0016020;GO:0051301;GO:0072334;	carbohydrate		Vc36a83.20	up	up	normal	GO:0003735;GO:0005840;GO:0006412;GO:0008654;GO:0009507;GO:0010189;GO:0015979;GO:0015995;GO:0016114;GO:0033385;GO:0033519;GO:0045550;GO:0071949;GO:0102067;GO:1990904;	Terpenoids		Vc28p2.18	up	up	normal	GO:0005576;GO:0009820;GO:0016020;GO:0016787;GO:0071555;GO:0071944;	Alkaloids		Vc17a308.27	up	up	normal	GO:0005811;GO:0005829;GO:0008202;GO:0008610;GO:0009507;GO:0016020;GO:0016491;GO:1901362;	Lipids
Vc25a173.26	up	up	down	GO:0009058;GO:0009714;GO:0009812;GO:0016747;GO:0030638;GO:0042803;	Flavonoids		Vc1a373.37	normal	up	down	GO:0004497;GO:0005506;GO:0005783;GO:0009805;GO:0009809;GO:0009813;GO:0016020;GO:0016705;GO:0020037;GO:0042802;	Phenylpropanoids		Vc14s198.21	no	yes	yes	normal	up	down	GO:0005886;GO:0008643;GO:0051119;GO:0055085;	carbohydrate		Vc36p156.4	up	up	normal	GO:0000166;GO:0003878;GO:0005829;GO:0006099;GO:0006633;GO:0009911;GO:0010025;GO:0015995;GO:0016109;GO:0016116;GO:0016829;GO:0019252;GO:0035639;GO:0043481;GO:0045793;GO:0045995;GO:0048366;GO:0097367;GO:0140615;	Terpenoids		Vc28s240.33	normal	normal	down	GO:0000139;GO:0004061;GO:0005789;GO:0009820;GO:0010296;	Alkaloids		Vc17a96.18	normal	up	down	GO:0006629;GO:0016020;GO:0016627;	Lipids
Vc25a245.28	up	up	normal	GO:0006633;GO:0009813;GO:0009922;GO:0016020;	Flavonoids		Vc1a398.30	up	normal	normal	GO:0002238;GO:0009416;GO:0009805;GO:0016020;GO:0016706;GO:0031418;GO:0045487;GO:0046872;	Phenylpropanoids		Vc14s22.27	no	no	yes	normal	normal	down	GO:0004553;GO:0005975;GO:0009057;GO:0016020;GO:0030246;	carbohydrate		Vc37p212.7	up	normal	up	GO:0004497;GO:0005506;GO:0016020;GO:0016114;GO:0016705;GO:0020037;GO:0033075;	Terpenoids		Vc28s247.27	normal	normal	down	GO:0009063;GO:0009234;GO:0009820;GO:0016020;GO:0030976;GO:0042372;GO:0042550;GO:0070204;GO:0070205;	Alkaloids		Vc17s264.49	up	up	normal	GO:0005634;GO:0006629;GO:0006952;GO:0106435;	Lipids
Vc25a44.25	up	up	normal	GO:0003854;GO:0006694;GO:0016621;GO:0045552;	Flavonoids		Vc1p308.0	normal	up	down	GO:0080037;GO:2000762;	Phenylpropanoids		Vc14s334.52	yes	yes	no	up	up	normal	GO:0004672;GO:0005524;GO:0016020;GO:0030246;	carbohydrate		Vc37s189.25	up	up	normal	GO:0004497;GO:0005506;GO:0006714;GO:0009414;GO:0009737;GO:0009835;GO:0016020;GO:0016115;GO:0016125;GO:0016705;GO:0020037;GO:0032787;GO:0043288;GO:0046164;GO:0046395;GO:0051762;GO:0120254;GO:1902644;	Terpenoids		Vc29a1.29	normal	normal	down	GO:0005515;GO:0005737;GO:0009409;GO:0009733;GO:0009737;GO:0009751;GO:0009753;GO:0009820;GO:0016020;GO:0016787;GO:0046872;GO:0060918;GO:2000012;	Alkaloids		Vc17s365.24	normal	down	up	GO:0004806;GO:0006629;	Lipids
Vc26a107.28	up	up	down	GO:0009813;GO:0016746;GO:0016872;	Flavonoids		Vc20a269.18	down	normal	down	GO:0002238;GO:0009416;GO:0009686;GO:0009805;GO:0016705;GO:0031418;GO:0046872;GO:0051213;	Phenylpropanoids		Vc14s83.18	no	no	yes	normal	normal	down	GO:0004553;GO:0005975;GO:0030246;	carbohydrate		Vc39p78.6	normal	up	down	GO:0000287;GO:0010333;GO:0016102;	Terpenoids		Vc29a198.27	up	normal	normal	GO:0004497;GO:0005506;GO:0016020;GO:0016705;GO:0020037;GO:0033075;	Alkaloids		Vc17s9.31	normal	normal	up	GO:0004190;GO:0005829;GO:0006629;GO:0009903;GO:0009904;GO:0016020;	Lipids
Vc26p234.1	normal	up	down	GO:0005783;GO:0008194;GO:0009628;GO:0009813;GO:0016020;GO:0016114;GO:0016131;GO:0016134;GO:0033554;GO:0046148;GO:0046283;GO:0046527;GO:0070887;GO:0098754;	Flavonoids		Vc20a5.31	up	up	up	GO:0008171;GO:0008757;GO:0009809;GO:0009813;GO:0032259;GO:0046983;GO:0102084;GO:0102938;	Phenylpropanoids		Vc155s2.63	yes	yes	no	up	up	normal	GO:0005975;GO:0016020;GO:0042973;	carbohydrate		Vc39s79.31	normal	up	down	GO:0000287;GO:0010333;GO:0016102;GO:0016740;	Terpenoids		Vc2a222.24	normal	up	down	GO:0006629;GO:0009820;GO:0016787;	Alkaloids		Vc188a1.58	normal	normal	up	GO:0005524;GO:0005739;GO:0005856;GO:0006744;GO:0008289;GO:0016020;	Lipids
Vc26s196.29	normal	up	down	GO:0000428;GO:0006351;GO:0009813;GO:0045430;GO:0046983;	Flavonoids		Vc20a68.33	up	up	normal	GO:0008194;GO:0009813;GO:0016114;GO:0031542;GO:0046148;GO:0046283;GO:0046527;GO:0102360;GO:0102425;GO:0102454;GO:1901038;GO:1901806;	Phenylpropanoids		Vc15a159.14	no	yes	yes	normal	up	down	GO:0000325;GO:0003825;GO:0004805;GO:0005576;GO:0006817;GO:0008519;GO:0009506;GO:0015145;GO:0015293;GO:0015749;GO:0016020;GO:0032440;GO:0050896;GO:0071944;GO:0072488;	carbohydrate		Vc3a410.20	up	up	normal	GO:0004497;GO:0005506;GO:0006714;GO:0009414;GO:0009737;GO:0009835;GO:0016020;GO:0016115;GO:0016125;GO:0016705;GO:0020037;GO:0032787;GO:0043288;GO:0046164;GO:0046395;GO:0051762;GO:0120254;GO:1902644;	Terpenoids		Vc2s399.76	normal	down	up	GO:0004497;GO:0005506;GO:0016020;GO:0016705;GO:0020037;GO:0033076;GO:0044550;GO:1901566;	Alkaloids		Vc18a14.24	normal	up	down	GO:0003887;GO:0005737;GO:0006869;GO:0006979;GO:0008289;GO:0012505;GO:0016020;GO:0016688;GO:0020037;GO:0043227;GO:0043229;GO:0046872;GO:0071897;GO:0098869;	Lipids
Vc26s51.59	normal	up	down	GO:0008194;GO:0009813;GO:0016020;GO:0046527;	Flavonoids		Vc20a68.35	up	normal	normal	GO:0008194;GO:0009813;GO:0016114;GO:0031542;GO:0046148;GO:0046283;GO:0046527;GO:0102360;GO:0102425;GO:0102454;GO:1901038;GO:1901806;	Phenylpropanoids		Vc15a263.29	no	yes	no	normal	up	normal	GO:0004553;GO:0005975;GO:0006952;GO:0016020;	carbohydrate		Vc3p332.10	normal	down	up	GO:0009535;GO:0009570;GO:0010114;GO:0016121;GO:0016702;GO:0046872;	Terpenoids		Vc30a169.20	normal	down	up	GO:0004497;GO:0005506;GO:0005783;GO:0008284;GO:0016020;GO:0016705;GO:0020037;GO:0033076;GO:0035265;GO:0040009;GO:0044550;GO:0046622;GO:0048437;GO:0051762;GO:1901566;	Alkaloids		Vc18a373.31	up	up	normal	GO:0005504;GO:0006631;GO:0009570;GO:0009813;GO:0016872;	Lipids
Vc28a290.34	up	up	down	GO:0008194;GO:0009813;GO:0016114;GO:0031542;GO:0046148;GO:0046283;GO:0046527;GO:0102360;GO:0102425;GO:0102454;GO:1901038;GO:1901806;	Flavonoids		Vc20s2.38	up	up	normal	GO:0005524;GO:0005737;GO:0009698;GO:0016020;GO:0016207;GO:0016491;	Phenylpropanoids		Vc15a315.27	yes	yes	no	up	up	normal	GO:0005576;GO:0005975;GO:0008422;GO:0016020;GO:0102483;	carbohydrate		Vc40a218.18	up	up	normal	GO:0004497;GO:0005506;GO:0016020;GO:0016114;GO:0016125;GO:0016135;GO:0016705;GO:0020037;	Terpenoids		Vc30a278.30	normal	down	up	GO:0009820;GO:0016042;GO:0016787;	Alkaloids		Vc18s236.23	normal	up	down	GO:0005829;GO:0006629;GO:0009651;GO:0016020;GO:0016301;GO:0016310;GO:0016311;GO:0016791;GO:0140096;	Lipids
Vc28a334.35	normal	up	normal	GO:0005773;GO:0009555;GO:0009812;GO:0009901;GO:0015297;GO:0016020;GO:0042910;GO:1901576;GO:1990961;	Flavonoids		Vc217p1.3	normal	up	down	GO:0004334;GO:0006558;GO:0006572;GO:0016020;GO:0046872;GO:1902222;	Phenylpropanoids		Vc15a315.28	no	yes	yes	normal	up	down	GO:0005509;GO:0005576;GO:0005975;GO:0008422;GO:0009057;GO:0102483;	carbohydrate		Vc40p218.4	up	up	normal	GO:0004497;GO:0005506;GO:0016020;GO:0016114;GO:0016125;GO:0016705;GO:0020037;	Terpenoids		Vc30a321.23	up	up	normal	GO:0009820;GO:0016746;GO:0050529;GO:0080030;GO:0080032;GO:0106435;	Alkaloids		Vc18s292.31	normal	up	down	GO:0005506;GO:0008610;GO:0016020;GO:0016125;GO:0016491;GO:1901362;GO:1901617;	Lipids
Vc28p309.2	normal	normal	down	GO:0000287;GO:0005737;GO:0008194;GO:0009813;GO:0016114;GO:0030976;GO:0046148;GO:0046283;GO:0046527;GO:0102970;	Flavonoids		Vc21a112.20	up	up	normal	GO:0005576;GO:0005773;GO:0006979;GO:0009505;GO:0009809;GO:0010089;GO:0016020;GO:0020037;GO:0031328;GO:0042744;GO:0046872;GO:0098869;GO:0140825;GO:1900378;GO:1901428;	Phenylpropanoids		Vc15a315.29	no	yes	yes	normal	up	down	GO:0005509;GO:0005576;GO:0005975;GO:0008422;GO:0009057;GO:0102483;	carbohydrate		Vc40s217.49	up	normal	normal	GO:0005811;GO:0010685;GO:0016020;GO:0016104;GO:0016126;GO:0016740;GO:0019742;GO:0031559;	Terpenoids		Vc31a62.26	normal	down	up	GO:0003860;GO:0009820;GO:0080167;GO:0106435;	Alkaloids		Vc18s82.29	normal	up	down	GO:0003989;GO:0005524;GO:0006633;GO:0009507;GO:0016740;GO:0046872;GO:2001295;	Lipids
Vc28s281.34	normal	up	normal	GO:0008194;GO:0009813;	Flavonoids		Vc21a112.21	up	up	normal	GO:0005576;GO:0005773;GO:0006979;GO:0009505;GO:0009809;GO:0010089;GO:0016020;GO:0020037;GO:0031328;GO:0042744;GO:0046872;GO:0098869;GO:0140825;GO:1900378;GO:1901428;	Phenylpropanoids		Vc15a375.33	no	yes	yes	normal	down	up	GO:0005886;GO:0008643;GO:0051119;GO:0055085;	carbohydrate		Vc41a187.32	up	up	normal	GO:0002238;GO:0005789;GO:0005811;GO:0005992;GO:0009723;GO:0009753;GO:0010038;GO:0016104;GO:0031559;GO:0042542;GO:0071731;	Terpenoids		Vc31s35.41	normal	normal	up	GO:0008171;GO:0008757;GO:0009809;GO:0009820;GO:0032259;	Alkaloids		Vc197a1.52	normal	up	down	GO:0001676;GO:0003997;GO:0005504;GO:0005777;GO:0006635;GO:0055088;GO:0071949;	Lipids
Vc29a108.20	up	up	down	GO:0009813;GO:0016746;GO:0016872;	Flavonoids		Vc21a123.22	normal	normal	down	GO:0002238;GO:0008168;GO:0009805;GO:0016705;GO:0032259;GO:0046872;GO:0051213;GO:0051555;GO:0120091;GO:2000022;	Phenylpropanoids		Vc15a97.35	no	yes	yes	normal	up	down	GO:0004553;GO:0005576;GO:0005975;GO:0009057;GO:0016020;	carbohydrate		Vc41a202.24	normal	up	normal	GO:0004497;GO:0005506;GO:0006694;GO:0008203;GO:0016020;GO:0016114;GO:0016135;GO:0016705;GO:0020037;GO:0044550;GO:0051762;	Terpenoids		Vc32a151.27	normal	down	up	GO:0004497;GO:0005506;GO:0005783;GO:0008284;GO:0016020;GO:0016705;GO:0020037;GO:0033076;GO:0035265;GO:0040009;GO:0044550;GO:0046622;GO:0048437;GO:0051762;GO:1901566;	Alkaloids		Vc19a153.16	up	up	down	GO:0004620;GO:0004806;GO:0006629;GO:0009507;GO:0009820;GO:0047714;	Lipids
Vc29a112.21	up	up	normal	GO:0005576;GO:0005773;GO:0006979;GO:0009505;GO:0009809;GO:0010089;GO:0016020;GO:0020037;GO:0031328;GO:0042744;GO:0046872;GO:0098869;GO:0140825;GO:1900378;GO:1901428;	Flavonoids		Vc21a13.24	up	up	normal	GO:0004497;GO:0005506;GO:0005739;GO:0009808;GO:0016020;GO:0016114;GO:0016705;GO:0020037;GO:0045548;GO:0051762;	Phenylpropanoids		Vc15s234.41	no	no	yes	normal	normal	down	GO:0004553;GO:0005975;GO:0030246;	carbohydrate		Vc41a202.31	up	up	normal	GO:0004497;GO:0005506;GO:0016020;GO:0016114;GO:0016125;GO:0016135;GO:0016705;GO:0020037;	Terpenoids		Vc32a192.34	normal	normal	down	GO:0003824;GO:0009653;GO:0009820;GO:0016020;	Alkaloids		Vc19a155.20	up	up	up	GO:0006633;GO:0009922;GO:0016020;GO:0090377;	Lipids
Vc29a124.18	normal	up	down	GO:0002238;GO:0008168;GO:0009805;GO:0016705;GO:0032259;GO:0046872;GO:0051213;GO:0051555;GO:0120091;GO:2000022;	Flavonoids		Vc21p267.0	normal	up	normal	GO:0002238;GO:0003723;GO:0009805;GO:0016705;GO:0046872;GO:0051213;	Phenylpropanoids		Vc15s324.35	yes	no	yes	up	normal	up	GO:0001067;GO:0003690;GO:0003700;GO:0004553;GO:0005515;GO:0005634;GO:0005829;GO:0005975;GO:0006355;GO:0009410;GO:0016020;GO:0043565;GO:0080183;GO:1902680;	carbohydrate		Vc41a203.19	up	up	normal	GO:0004497;GO:0005506;GO:0016020;GO:0016114;GO:0016125;GO:0016135;GO:0016705;GO:0020037;	Terpenoids		Vc32a205.18	normal	normal	down	GO:0004497;GO:0005506;GO:0010268;GO:0016020;GO:0016125;GO:0016132;GO:0016705;GO:0020037;GO:0033075;GO:0048366;GO:0051762;GO:0080132;GO:1902652;	Alkaloids		Vc19a17.33	normal	up	down	GO:0004806;GO:0005840;GO:0009820;GO:0016042;	Lipids
Vc29p189.2	normal	up	down	GO:0000428;GO:0009813;GO:0045430;	Flavonoids		Vc22a131.24	up	up	normal	GO:0002238;GO:0007033;GO:0009611;GO:0009718;GO:0009753;GO:0009805;GO:0010023;GO:0016705;GO:0031418;GO:0046872;GO:0051213;	Phenylpropanoids		Vc1696a0.2	no	no	yes	normal	normal	up	GO:0006817;GO:0008643;GO:0015293;GO:0016020;GO:0055085;	carbohydrate		Vc41a34.48	normal	normal	up	GO:0000287;GO:0004497;GO:0005506;GO:0010333;GO:0016020;GO:0016114;GO:0016705;GO:0020037;GO:0051762;	Terpenoids		Vc33a146.17	up	normal	up	GO:0004497;GO:0005506;GO:0016020;GO:0016705;GO:0020037;GO:0033075;	Alkaloids		Vc19a265.20	normal	down	up	GO:0000981;GO:0003677;GO:0005634;GO:0006357;GO:0008289;	Lipids
Vc29p226.18	normal	up	down	GO:0005783;GO:0008194;GO:0009628;GO:0009813;GO:0016020;GO:0016131;GO:0016134;GO:0033554;GO:0046148;GO:0046283;GO:0046527;GO:0070887;GO:0098754;	Flavonoids		Vc22a254.31	normal	up	down	GO:0004321;GO:0005524;GO:0005737;GO:0009611;GO:0009617;GO:0009695;GO:0009698;GO:0009851;GO:0016020;GO:0016405;GO:0016878;GO:0031408;GO:0043231;	Phenylpropanoids		Vc16a19.20	no	yes	yes	normal	up	down	GO:0005975;GO:0047268;GO:0047274;	carbohydrate		Vc41a59.21	normal	up	down	GO:0004497;GO:0005506;GO:0016020;GO:0016114;GO:0016705;GO:0020037;GO:0044550;	Terpenoids		Vc33a256.32	normal	down	up	GO:0004601;GO:0006488;GO:0009820;GO:0016020;GO:0016787;GO:0016829;GO:0098869;	Alkaloids		Vc19a272.32	down	down	normal	GO:0000325;GO:0004190;GO:0005576;GO:0005783;GO:0006508;GO:0006629;GO:0009506;GO:0016020;GO:0099503;	Lipids
Vc29p50.1	normal	normal	up	GO:0003676;GO:0005737;GO:0006807;GO:0008168;GO:0008194;GO:0009813;GO:0016114;GO:0043414;GO:0046148;GO:0046283;GO:0046527;GO:0102890;GO:0102891;	Flavonoids		Vc22a301.32	normal	down	up	GO:0004497;GO:0005506;GO:0009808;GO:0016020;GO:0016114;GO:0016705;GO:0020037;	Phenylpropanoids		Vc16a213.28	no	yes	yes	normal	up	down	GO:0005768;GO:0005794;GO:0008643;GO:0015297;GO:0016020;GO:0031984;GO:0055085;	carbohydrate		Vc41s186.31	up	up	normal	GO:0005789;GO:0005811;GO:0005992;GO:0016104;GO:0031559;	Terpenoids		Vc33a314.24	normal	up	down	GO:0005737;GO:0009409;GO:0009733;GO:0009737;GO:0009751;GO:0009753;GO:0009820;GO:0016020;GO:0016787;GO:0046872;GO:0060918;GO:2000012;	Alkaloids		Vc19a363.25	normal	up	normal	GO:0004435;GO:0005886;GO:0016042;GO:0035556;GO:0042823;GO:0051209;	Lipids
Vc29p50.35	normal	up	down	GO:0008194;GO:0009813;	Flavonoids		Vc22a31.32	normal	down	up	GO:0002238;GO:0009416;GO:0009686;GO:0009805;GO:0009826;GO:0009899;GO:0009908;GO:0016491;GO:0046872;	Phenylpropanoids		Vc16a26.46	yes	yes	no	up	up	normal	GO:0005829;GO:0005975;GO:0006116;GO:0009331;GO:0016020;GO:0042803;GO:0046168;GO:0047952;GO:0051287;	carbohydrate		Vc42a199.39	normal	up	down	GO:0002238;GO:0004310;GO:0005783;GO:0006722;GO:0008610;GO:0009723;GO:0009751;GO:0009753;GO:0016125;GO:0016135;GO:0031090;GO:0031984;GO:0042175;GO:0042542;GO:0044249;GO:0045338;GO:0046872;GO:0051996;GO:0071731;GO:1901362;GO:1901617;GO:1902438;	Terpenoids		Vc34a306.22	normal	normal	up	GO:0009820;GO:0016020;GO:0016740;GO:0016787;	Alkaloids		Vc19a37.38	normal	down	up	GO:0004322;GO:0005737;GO:0006826;GO:0006879;GO:0006979;GO:0008198;GO:0008199;GO:0009725;GO:0009908;GO:0010039;GO:0015979;GO:0033993;GO:0043231;GO:0048366;GO:0051238;GO:0051651;GO:1901700;	Lipids
Vc2a248.22	up	up	normal	GO:0006633;GO:0009813;GO:0009922;GO:0016020;	Flavonoids		Vc22p246.0	normal	up	normal	GO:0004664;GO:0006558;GO:0009095;GO:0009570;GO:0016020;GO:0047769;GO:1902223;	Phenylpropanoids		Vc16a3.31	no	yes	no	normal	up	normal	GO:0005975;GO:0006098;GO:0016020;GO:0016857;GO:0046872;	carbohydrate		Vc43a171.21	normal	down	up	GO:0004497;GO:0005506;GO:0006714;GO:0016020;GO:0016115;GO:0016125;GO:0016705;GO:0020037;GO:0032787;GO:0033076;GO:0043288;GO:0044550;GO:0046164;GO:0046395;GO:0051762;GO:0120254;GO:1901566;GO:1902644;	Terpenoids		Vc35s122.25	normal	down	up	GO:0009820;GO:0016787;GO:0044255;	Alkaloids		Vc19a57.30	up	up	normal	GO:0006633;GO:0009922;GO:0016020;	Lipids
Vc2a358.33	normal	down	up	GO:0003676;GO:0004523;GO:0005737;GO:0008194;GO:0009813;GO:0016020;GO:0046148;GO:0046283;GO:0046527;	Flavonoids		Vc22s254.43	normal	up	down	GO:0005524;GO:0005737;GO:0009698;GO:0016020;GO:0016207;GO:0016491;	Phenylpropanoids		Vc16a390.30	no	yes	yes	normal	up	down	GO:0000325;GO:0006817;GO:0008643;GO:0009409;GO:0009414;GO:0009744;GO:0009749;GO:0009750;GO:0016020;GO:0019900;GO:0022857;GO:0032440;GO:0055085;	carbohydrate		Vc43a72.30	up	up	normal	GO:0004497;GO:0005506;GO:0016020;GO:0016114;GO:0016705;GO:0020037;GO:0098827;	Terpenoids		Vc35s198.26	normal	up	down	GO:0009820;GO:0016020;GO:0016787;	Alkaloids		Vc19a62.27	normal	up	down	GO:0005773;GO:0016042;GO:0016298;GO:0016740;GO:0045735;	Lipids
Vc2a63.19	up	up	normal	GO:0003854;GO:0006694;GO:0016621;GO:0045552;	Flavonoids		Vc22s81.46	up	up	normal	GO:0009699;GO:0009806;GO:0016491;	Phenylpropanoids		Vc16p36.1	yes	yes	yes	up	up	down	GO:0005975;GO:0047274;	carbohydrate		Vc43a75.21	normal	down	up	GO:0004497;GO:0005506;GO:0009808;GO:0016020;GO:0016114;GO:0016705;GO:0020037;GO:0051762;	Terpenoids		Vc36a54.44	normal	down	up	GO:0004497;GO:0005506;GO:0016020;GO:0016705;GO:0020037;GO:0033076;GO:0044550;GO:1901566;	Alkaloids		Vc19a94.25	normal	normal	up	GO:0003746;GO:0003924;GO:0005525;GO:0005634;GO:0005829;GO:0005840;GO:0006397;GO:0006414;GO:0006629;GO:0008380;GO:0009536;GO:0016298;GO:0030623;GO:0120114;GO:1902494;GO:1990904;	Lipids
Vc2a67.14	up	up	down	GO:0009058;GO:0009714;GO:0009812;GO:0016747;GO:0030638;GO:0042803;	Flavonoids		Vc23a357.24	normal	up	down	GO:0005777;GO:0009611;GO:0009617;GO:0009695;GO:0009698;GO:0009753;GO:0016020;GO:0016207;GO:0106290;	Phenylpropanoids		Vc16s225.46	no	yes	yes	normal	down	up	GO:0004674;GO:0005524;GO:0016020;GO:0016310;GO:0030246;GO:0071944;	carbohydrate		Vc44a146.31	up	up	normal	GO:0005811;GO:0016020;GO:0016104;GO:0031559;GO:0090438;	Terpenoids		Vc37a215.20	normal	down	up	GO:0004497;GO:0005506;GO:0016020;GO:0016705;GO:0020037;GO:0033075;	Alkaloids		Vc19p29.0	normal	down	up	GO:0009791;GO:0012511;GO:0016020;GO:0048608;	Lipids
Vc2p285.2	normal	up	down	GO:0008194;GO:0009507;GO:0009813;	Flavonoids		Vc23p90.4	normal	down	up	GO:0008194;GO:0009636;GO:0009809;GO:0009813;GO:0016020;GO:0042178;GO:0046148;GO:0046283;GO:0046527;	Phenylpropanoids		Vc16s51.45	no	yes	yes	normal	up	down	GO:0004650;GO:0005975;	carbohydrate		Vc46a145.24	up	down	up	GO:0004497;GO:0005506;GO:0006721;GO:0008299;GO:0009808;GO:0016020;GO:0016705;GO:0020037;GO:0051761;GO:0120251;	Terpenoids		Vc37a273.28	normal	down	up	GO:0009820;GO:0016787;GO:0098734;GO:0140096;	Alkaloids		Vc19s12.31	normal	up	normal	GO:0000287;GO:0004743;GO:0005524;GO:0005739;GO:0006096;GO:0006633;GO:0009570;GO:0010431;GO:0016301;GO:0016310;GO:0030955;	Lipids
Vc2p377.22	normal	down	up	GO:0005737;GO:0008194;GO:0009813;GO:0016020;GO:0046148;GO:0046283;GO:0046527;	Flavonoids		Vc24a101.15	up	up	normal	GO:0005737;GO:0006558;GO:0009074;GO:0009800;GO:0045548;GO:1902222;	Phenylpropanoids		Vc17a169.23	no	yes	yes	normal	up	down	GO:0004427;GO:0005509;GO:0005783;GO:0006457;GO:0009678;GO:0016020;GO:0016491;GO:0030246;GO:0051082;GO:1902600;	carbohydrate		Vc46a151.30	up	up	normal	GO:0004497;GO:0005506;GO:0016020;GO:0016114;GO:0016705;GO:0020037;GO:0098827;	Terpenoids		Vc37p212.7	up	normal	up	GO:0004497;GO:0005506;GO:0016020;GO:0016114;GO:0016705;GO:0020037;GO:0033075;	Alkaloids		Vc19s130.30	up	up	normal	GO:0005783;GO:0006633;GO:0009409;GO:0009416;GO:0009922;GO:0010025;GO:0016020;GO:0048868;GO:0090378;	Lipids
Vc30a208.37	up	up	down	GO:0009718;GO:0016020;GO:0043473;GO:0045552;GO:0047890;	Flavonoids		Vc24a111.29	up	up	up	GO:0004106;GO:0004664;GO:0006558;GO:0009095;GO:0009570;GO:0047769;GO:1902223;	Phenylpropanoids		Vc17a22.22	no	yes	yes	normal	up	down	GO:0003676;GO:0005634;GO:0005829;GO:0005886;GO:0006979;GO:0008865;GO:0009408;GO:0009409;GO:0009506;GO:0016787;GO:0034337;GO:0046835;GO:0061077;	carbohydrate		Vc46p82.24	normal	down	up	GO:0004497;GO:0005506;GO:0006714;GO:0009639;GO:0010162;GO:0016020;GO:0016114;GO:0016115;GO:0016125;GO:0016705;GO:0020037;GO:0032787;GO:0043288;GO:0044550;GO:0046164;GO:0046395;GO:0050832;GO:0051762;GO:0097438;GO:0120254;GO:1902644;	Terpenoids		Vc37s258.30	normal	normal	down	GO:0009820;GO:0016020;GO:0016042;GO:0016787;	Alkaloids		Vc1a16.36	normal	up	normal	GO:0000166;GO:0003878;GO:0005737;GO:0006085;GO:0006099;GO:0006629;GO:0016829;GO:0016874;GO:0035639;GO:0046872;GO:0072330;GO:0097367;	Lipids
Vc30a297.38	up	up	down	GO:0009813;GO:0016491;GO:0031418;GO:0043473;GO:0046872;	Flavonoids		Vc24a250.20	up	up	normal	GO:0005524;GO:0009723;GO:0009805;GO:0009836;GO:0015995;GO:0016746;GO:0016851;	Phenylpropanoids		Vc17a223.18	no	yes	yes	normal	up	down	GO:0005975;GO:0008422;GO:0009507;GO:0102726;	carbohydrate		Vc46p94.5	normal	up	down	GO:0003725;GO:0005506;GO:0009507;GO:0016020;GO:0016114;GO:0019288;GO:0046429;GO:0051539;	Terpenoids		Vc38a123.26	normal	normal	down	GO:0001666;GO:0004024;GO:0005829;GO:0008270;GO:0009409;GO:0009413;GO:0009414;GO:0009651;GO:0009737;GO:0009744;GO:0031000;GO:0032355;GO:0042542;GO:0042803;GO:0046294;GO:0051903;GO:1900039;	Alkaloids		Vc1a247.15	normal	up	down	GO:0004190;GO:0006629;GO:0016020;	Lipids
Vc30a303.29	up	up	normal	GO:0005634;GO:0005783;GO:0006979;GO:0009611;GO:0009629;GO:0009699;GO:0009705;GO:0009714;GO:0009733;GO:0009753;GO:0009813;GO:0009926;GO:0010224;GO:0016210;GO:0030639;GO:0031540;GO:0034081;GO:0042181;GO:0042803;GO:0050350;GO:0102128;GO:0120255;GO:1901696;	Flavonoids		Vc24a58.38	up	up	normal	GO:0004497;GO:0005506;GO:0005634;GO:0006721;GO:0008299;GO:0009808;GO:0016020;GO:0016705;GO:0016874;GO:0020037;GO:0045548;GO:0051761;GO:0120251;	Phenylpropanoids		Vc17a278.16	no	no	yes	normal	normal	up	GO:0003723;GO:0004519;GO:0004540;GO:0008270;GO:0009451;GO:0030246;GO:0043231;	carbohydrate		Vc47a126.34	up	up	normal	GO:0004497;GO:0005506;GO:0016020;GO:0016114;GO:0016705;GO:0020037;GO:0098827;	Terpenoids		Vc38a95.28	normal	down	up	GO:0004497;GO:0005506;GO:0016020;GO:0016705;GO:0020037;GO:0033075;	Alkaloids		Vc1a302.27	normal	up	down	GO:0006629;GO:0016020;GO:0016717;GO:0045485;GO:0072330;	Lipids
Vc30a338.22	up	up	normal	GO:0003854;GO:0006694;GO:0016621;GO:0045552;	Flavonoids		Vc24a72.33	up	up	normal	GO:0005576;GO:0005975;GO:0008422;GO:0016020;GO:0102483;	Phenylpropanoids		Vc17a320.36	no	no	yes	normal	normal	down	GO:0005347;GO:0005509;GO:0005743;GO:0015711;GO:0015748;GO:0015931;GO:0055085;GO:1901264;	carbohydrate		Vc47a7.20	normal	down	up	GO:0004497;GO:0005506;GO:0006714;GO:0016020;GO:0016115;GO:0016125;GO:0016705;GO:0020037;GO:0032787;GO:0033076;GO:0043288;GO:0044550;GO:0046164;GO:0046395;GO:0120254;GO:1901576;GO:1902644;	Terpenoids		Vc38p25.7	normal	down	up	GO:0008250;GO:0008474;GO:0009820;GO:0098734;	Alkaloids		Vc1a374.32	up	up	normal	GO:0005576;GO:0016020;GO:0016042;GO:0016719;GO:0016788;GO:0052886;GO:0052887;	Lipids
Vc30p58.9	up	up	down	GO:0008171;GO:0008757;GO:0009809;GO:0032259;GO:0102822;	Flavonoids		Vc24s137.42	normal	normal	up	GO:0005777;GO:0006631;GO:0008756;GO:0009507;GO:0009698;GO:0016020;GO:0016207;GO:0031956;GO:0042372;GO:0106290;	Phenylpropanoids		Vc17a321.35	no	yes	no	normal	up	normal	GO:0004601;GO:0005509;GO:0007231;GO:0009408;GO:0009611;GO:0016020;GO:0033500;GO:0043069;GO:0050664;GO:0050832;GO:0071944;GO:0072593;GO:0098869;	carbohydrate		Vc47p76.22	normal	up	down	GO:0005506;GO:0009507;GO:0009617;GO:0009862;GO:0016114;GO:0019288;GO:0046429;GO:0051539;	Terpenoids		Vc39a102.25	normal	down	up	GO:0004497;GO:0005506;GO:0016020;GO:0016705;GO:0020037;GO:0033075;	Alkaloids		Vc1a439.25	normal	up	normal	GO:0000166;GO:0003989;GO:0006633;GO:0009317;GO:0016020;	Lipids
Vc30s175.29	up	normal	normal	GO:0008194;GO:0009813;	Flavonoids		Vc24s73.41	normal	up	down	GO:0005509;GO:0005576;GO:0005975;GO:0008422;GO:0009057;GO:0102483;	Phenylpropanoids		Vc17a337.44	no	yes	yes	normal	up	down	GO:0002237;GO:0004370;GO:0005524;GO:0005739;GO:0005829;GO:0006071;GO:0006072;GO:0006641;GO:0010188;GO:0016310;GO:0019405;GO:0042742;GO:0090407;GO:1901137;	carbohydrate		Vc4a177.21	normal	up	down	GO:0000287;GO:0007623;GO:0009570;GO:0010333;GO:0016102;GO:0034007;GO:0034768;GO:0102701;	Terpenoids		Vc39s131.28	normal	normal	down	GO:0001666;GO:0004024;GO:0005829;GO:0008270;GO:0009409;GO:0009413;GO:0009414;GO:0009651;GO:0009737;GO:0009744;GO:0031000;GO:0032355;GO:0042542;GO:0042803;GO:0046294;GO:0051903;GO:1900039;	Alkaloids		Vc1a44.31	normal	up	down	GO:0006633;GO:0009507;GO:0009532;GO:0019904;GO:0031177;GO:0044620;GO:0140414;	Lipids
Vc31a324.32	normal	up	down	GO:0002238;GO:0004386;GO:0009805;GO:0009813;GO:0016491;GO:0031418;GO:0043473;GO:0046872;	Flavonoids		Vc25a320.43	normal	up	normal	GO:0005507;GO:0016020;GO:0046274;GO:0048046;GO:0052716;	Phenylpropanoids		Vc17a343.51	no	yes	yes	normal	up	down	GO:0004650;GO:0005975;GO:0016020;GO:0016829;	carbohydrate		Vc4a177.22	normal	up	down	GO:0000287;GO:0006952;GO:0007623;GO:0009570;GO:0010333;GO:0016102;GO:0016787;GO:0034007;GO:0034768;GO:0102701;	Terpenoids		Vc3a387.25	normal	up	down	GO:0009820;GO:0016787;GO:0140096;	Alkaloids		Vc1a90.20	up	up	normal	GO:0006633;GO:0009922;GO:0016020;GO:0090378;	Lipids
Vc31s314.37	normal	up	down	GO:0003729;GO:0006952;GO:0009615;GO:0010224;GO:0016020;GO:0031540;GO:0046686;	Flavonoids		Vc25a44.25	up	up	normal	GO:0003854;GO:0006694;GO:0016621;GO:0045552;	Phenylpropanoids		Vc17a383.21	no	yes	yes	normal	up	down	GO:0004565;GO:0005773;GO:0005975;GO:0016020;GO:0030246;	carbohydrate		Vc4s177.24	normal	up	down	GO:0000287;GO:0007623;GO:0009570;GO:0010333;GO:0016102;GO:0034007;GO:0034768;GO:0102701;	Terpenoids		Vc3p108.0	up	up	normal	GO:0009820;GO:0016787;	Alkaloids		Vc1a96.22	normal	up	down	GO:0005634;GO:0008289;GO:0016020;	Lipids
Vc32a297.40	up	up	down	GO:0003854;GO:0006694;GO:0016621;GO:0045552;	Flavonoids		Vc26a126.26	normal	up	down	GO:0002238;GO:0008168;GO:0009805;GO:0016705;GO:0032259;GO:0046872;GO:0051213;GO:0120091;GO:2000022;	Phenylpropanoids		Vc17a50.20	yes	yes	no	up	up	normal	GO:0004674;GO:0005524;GO:0005975;GO:0008061;GO:0016020;GO:0016310;GO:0016787;	carbohydrate		Vc4s180.34	normal	down	up	GO:0000287;GO:0009507;GO:0009532;GO:0009685;GO:0010333;GO:0016020;GO:0016102;GO:0016740;GO:0046394;	Terpenoids		Vc40a12.24	up	up	normal	GO:0004497;GO:0005506;GO:0016020;GO:0016705;GO:0020037;GO:0033076;GO:0044550;GO:1901566;	Alkaloids		Vc1p68.6	normal	up	down	GO:0005737;GO:0006633;GO:0016020;GO:0016702;GO:0031408;GO:0034440;GO:0046872;	Lipids
Vc32a318.21	up	up	normal	GO:0005634;GO:0005783;GO:0006979;GO:0009611;GO:0009629;GO:0009699;GO:0009705;GO:0009714;GO:0009733;GO:0009753;GO:0009813;GO:0009926;GO:0010224;GO:0016210;GO:0030639;GO:0031540;GO:0034081;GO:0042181;GO:0042803;GO:0050350;GO:0102128;GO:0120255;GO:1901696;	Flavonoids		Vc26a16.35	up	up	normal	GO:0003854;GO:0006694;GO:0016621;	Phenylpropanoids		Vc17a56.35	yes	yes	no	up	up	normal	GO:0002229;GO:0004672;GO:0004888;GO:0005524;GO:0005886;GO:0007178;GO:0016310;GO:0030246;GO:0042742;	carbohydrate		Vc4s297.30	up	up	normal	GO:0000166;GO:0003878;GO:0005829;GO:0006099;GO:0006633;GO:0009911;GO:0010025;GO:0015995;GO:0016109;GO:0016116;GO:0016829;GO:0019252;GO:0035639;GO:0043481;GO:0045793;GO:0045995;GO:0048366;GO:0097367;GO:0140615;	Terpenoids		Vc40a15.26	normal	down	up	GO:0004497;GO:0005506;GO:0016020;GO:0016705;GO:0020037;GO:0033075;	Alkaloids		Vc1s138.31	normal	down	up	GO:0000325;GO:0004497;GO:0004601;GO:0005509;GO:0005783;GO:0009269;GO:0009409;GO:0009651;GO:0009737;GO:0009751;GO:0009941;GO:0010118;GO:0012511;GO:0016020;GO:0031407;GO:0050832;GO:0098869;GO:0102070;GO:1902609;GO:1990137;GO:2000377;	Lipids
Vc32a323.35	up	up	normal	GO:0009813;GO:0016491;GO:0031418;GO:0043473;GO:0046872;	Flavonoids		Vc26a180.26	up	up	normal	GO:0005737;GO:0006558;GO:0009074;GO:0009800;GO:0045548;GO:1902222;	Phenylpropanoids		Vc17a56.37	yes	yes	no	up	up	normal	GO:0004672;GO:0004888;GO:0005524;GO:0007154;GO:0016020;GO:0016310;GO:0023052;GO:0030246;GO:0044419;GO:0050794;GO:0050896;GO:0071944;	carbohydrate		Vc4s357.34	normal	up	normal	GO:0003735;GO:0005840;GO:0006412;GO:0008654;GO:0009507;GO:0010189;GO:0015979;GO:0015995;GO:0016114;GO:0033385;GO:0033519;GO:0045550;GO:0071949;GO:0102067;GO:1990904;	Terpenoids		Vc40p15.17	normal	normal	down	GO:0004497;GO:0005506;GO:0016020;GO:0016705;GO:0020037;GO:0033075;	Alkaloids		Vc1s251.29	up	up	normal	GO:0006869;GO:0008289;GO:0009826;GO:0045165;GO:0090376;	Lipids
Vc32p137.5	up	up	normal	GO:0008194;GO:0009813;	Flavonoids		Vc26a61.51	normal	normal	down	GO:0005524;GO:0005737;GO:0006631;GO:0009698;GO:0010030;GO:0010214;GO:0016020;GO:0016829;GO:0016874;GO:0033611;GO:0050832;GO:0140657;	Phenylpropanoids		Vc17a80.35	yes	no	yes	up	normal	up	GO:0004674;GO:0005524;GO:0016020;GO:0016310;GO:0019752;GO:0030246;GO:0046912;	carbohydrate		Vc544a0.21	normal	up	normal	GO:0004497;GO:0005506;GO:0016020;GO:0016114;GO:0016705;GO:0020037;GO:0044550;	Terpenoids		Vc40p18.6	normal	normal	up	GO:0004392;GO:0005789;GO:0006788;GO:0009820;GO:0015031;GO:0016787;	Alkaloids		Vc1s301.33	normal	up	normal	GO:0004318;GO:0004319;GO:0006633;GO:0006720;	Lipids
Vc32p199.0	up	up	down	GO:0006720;GO:0009718;GO:0016020;GO:0045552;GO:0047890;	Flavonoids		Vc27p288.0	up	up	normal	GO:0005524;GO:0005737;GO:0008270;GO:0009611;GO:0009698;GO:0009753;GO:0016020;GO:0016207;GO:0016491;GO:0016740;GO:0050563;GO:0106286;GO:0106290;	Phenylpropanoids		Vc17p169.6	no	yes	yes	normal	up	down	GO:0003924;GO:0005509;GO:0005525;GO:0005788;GO:0005789;GO:0006457;GO:0030246;GO:0030433;GO:0051082;	carbohydrate		Vc55a10.22	down	up	down	GO:0008661;GO:0009228;GO:0016020;GO:0016114;GO:0046872;GO:0052863;GO:0090407;GO:1901137;	Terpenoids		Vc41a56.37	normal	normal	down	GO:0004497;GO:0005506;GO:0016020;GO:0016705;GO:0020037;GO:0033076;GO:0044550;GO:1901576;	Alkaloids		Vc200a0.29	normal	down	up	GO:0005829;GO:0006720;GO:0012511;GO:0016020;GO:0016491;GO:0050661;	Lipids
Vc32p21.11	normal	up	down	GO:0008171;GO:0008757;GO:0009809;GO:0032259;GO:0102822;	Flavonoids		Vc27p311.2	normal	up	down	GO:0080037;GO:2000762;	Phenylpropanoids		Vc17s140.25	no	yes	yes	normal	up	down	GO:0003735;GO:0004348;GO:0005840;GO:0005975;GO:0006412;GO:0006680;GO:0008422;GO:0016020;GO:1990904;	carbohydrate		Vc56p7.13	normal	up	down	GO:0008661;GO:0009228;GO:0016020;GO:0016114;GO:0046872;GO:0052863;GO:0090407;GO:1901137;	Terpenoids		Vc42a90.16	normal	up	down	GO:0004497;GO:0005506;GO:0010268;GO:0016020;GO:0016125;GO:0016132;GO:0016705;GO:0020037;GO:0033075;GO:0048366;GO:0051762;GO:0080132;GO:1902652;	Alkaloids		Vc20a127.40	up	up	normal	GO:0006633;GO:0009922;GO:0016020;	Lipids
Vc32p295.10	normal	up	down	GO:0006886;GO:0006888;GO:0008194;GO:0008270;GO:0009813;GO:0030127;GO:0046148;GO:0046283;GO:0046527;	Flavonoids		Vc27s291.30	up	up	normal	GO:0005737;GO:0009723;GO:0009809;GO:0009836;GO:0009963;GO:0016020;GO:0016740;	Phenylpropanoids		Vc17s224.18	no	yes	yes	normal	up	down	GO:0004553;GO:0005975;GO:0009507;GO:0016020;	carbohydrate		Vc5a268.35	normal	down	up	GO:0008194;GO:0009813;GO:0016020;GO:0016114;GO:0046148;GO:0046283;GO:0046527;	Terpenoids		Vc42p53.1	up	normal	up	GO:0003755;GO:0004497;GO:0005506;GO:0016020;GO:0016705;GO:0020037;GO:0033075;GO:0051762;	Alkaloids		Vc20a143.30	normal	down	up	GO:0005576;GO:0006629;GO:0016020;GO:0016298;GO:1901575;	Lipids
Vc32p295.2	down	up	down	GO:0005509;GO:0008194;GO:0009813;GO:0016020;GO:0046148;GO:0046283;GO:0046527;	Flavonoids		Vc28a184.20	normal	up	down	GO:0002238;GO:0009805;GO:0016491;GO:0031418;GO:0046872;	Phenylpropanoids		Vc17s341.52	yes	yes	no	up	up	normal	GO:0005975;GO:0016020;GO:0042973;	carbohydrate		Vc5a295.31	normal	down	up	GO:0005829;GO:0008194;GO:0009813;GO:0016020;GO:0016114;GO:0046148;GO:0046283;GO:0046527;	Terpenoids		Vc42s127.24	normal	up	down	GO:0005794;GO:0009820;GO:0010296;GO:0016020;GO:0098827;	Alkaloids		Vc20a166.14	up	up	normal	GO:0005504;GO:0009627;	Lipids
Vc32s99.39	up	normal	normal	GO:0045552;	Flavonoids		Vc28a290.34	up	up	down	GO:0008194;GO:0009813;GO:0016114;GO:0031542;GO:0046148;GO:0046283;GO:0046527;GO:0102360;GO:0102425;GO:0102454;GO:1901038;GO:1901806;	Phenylpropanoids		Vc17s56.40	yes	yes	no	up	up	normal	GO:0002229;GO:0004672;GO:0004888;GO:0005524;GO:0007178;GO:0009610;GO:0016020;GO:0016310;GO:0030246;GO:0042742;GO:0051726;GO:0071944;	carbohydrate		Vc5a295.34	normal	down	up	GO:0008194;GO:0009813;GO:0016020;GO:0016114;GO:0046148;GO:0046283;GO:0046527;	Terpenoids		Vc43a171.21	normal	down	up	GO:0004497;GO:0005506;GO:0006714;GO:0016020;GO:0016115;GO:0016125;GO:0016705;GO:0020037;GO:0032787;GO:0033076;GO:0043288;GO:0044550;GO:0046164;GO:0046395;GO:0051762;GO:0120254;GO:1901566;GO:1902644;	Alkaloids		Vc20a18.30	normal	normal	down	GO:0005840;GO:0009820;GO:0016042;GO:0016787;	Lipids
Vc33a201.41	normal	normal	down	GO:0003723;GO:0005737;GO:0006721;GO:0008194;GO:0008299;GO:0009813;GO:0046148;GO:0046283;GO:0046527;	Flavonoids		Vc28a349.38	up	up	normal	GO:0005737;GO:0009698;GO:0010584;GO:0016020;GO:0016207;GO:0016491;GO:0106290;	Phenylpropanoids		Vc17s56.41	yes	yes	no	up	up	normal	GO:0002229;GO:0004672;GO:0004888;GO:0005524;GO:0005886;GO:0007178;GO:0009610;GO:0016310;GO:0030246;GO:0042742;	carbohydrate		Vc5a297.44	normal	down	up	GO:0005829;GO:0008194;GO:0009813;GO:0016020;GO:0016114;GO:0046148;GO:0046283;GO:0046527;	Terpenoids		Vc43a35.19	normal	normal	up	GO:0006629;GO:0009820;GO:0016020;GO:0016787;	Alkaloids		Vc20a213.21	normal	down	up	GO:0003677;GO:0003700;GO:0005634;GO:0006355;GO:0008289;GO:0016020;GO:0030154;	Lipids
Vc33a226.20	up	up	normal	GO:0005576;GO:0005773;GO:0006979;GO:0009505;GO:0009809;GO:0010089;GO:0016020;GO:0020037;GO:0031328;GO:0042744;GO:0046872;GO:0098869;GO:0140825;GO:1900378;GO:1901428;	Flavonoids		Vc28a99.17	normal	up	down	GO:0002238;GO:0009416;GO:0009686;GO:0009805;GO:0016705;GO:0031418;GO:0046872;GO:0051213;	Phenylpropanoids		Vc187a1.46	no	no	yes	normal	normal	down	GO:0001678;GO:0004396;GO:0005524;GO:0005536;GO:0005739;GO:0005829;GO:0006096;GO:0009507;GO:0016020;GO:0019318;GO:0046835;GO:0051156;	carbohydrate		Vc5p375.4	down	up	down	GO:0009535;GO:0009570;GO:0009687;GO:0016106;GO:0016121;GO:0016702;GO:0043289;GO:0046872;GO:0072330;GO:0120255;GO:1902645;	Terpenoids		Vc44s27.23	normal	up	normal	GO:0006629;GO:0008970;GO:0009534;GO:0009820;GO:0015908;GO:0016020;GO:0044249;GO:0052739;GO:1901576;	Alkaloids		Vc20a37.42	normal	down	up	GO:0004322;GO:0005737;GO:0006826;GO:0006879;GO:0006979;GO:0008198;GO:0008199;GO:0009725;GO:0009908;GO:0010039;GO:0015979;GO:0033993;GO:0043231;GO:0048366;GO:0051238;GO:0051651;GO:1901700;	Lipids
Vc33a231.26	up	up	down	GO:0009813;GO:0016746;GO:0016872;	Flavonoids		Vc29a112.21	up	up	normal	GO:0005576;GO:0005773;GO:0006979;GO:0009505;GO:0009809;GO:0010089;GO:0016020;GO:0020037;GO:0031328;GO:0042744;GO:0046872;GO:0098869;GO:0140825;GO:1900378;GO:1901428;	Phenylpropanoids		Vc18a30.23	yes	no	no	down	normal	normal	GO:0005975;GO:0016020;GO:0042973;	carbohydrate		Vc5p40.16	normal	up	down	GO:0003735;GO:0005840;GO:0006412;GO:0008661;GO:0009228;GO:0009536;GO:0015995;GO:0016020;GO:0016114;GO:0046872;GO:0052865;GO:1990904;	Terpenoids		Vc46a106.17	normal	up	down	GO:0009820;GO:0016787;GO:0140096;	Alkaloids		Vc20a41.51	normal	up	down	GO:0004435;GO:0005886;GO:0016042;GO:0035556;	Lipids
Vc33p116.4	normal	normal	down	GO:0004142;GO:0006657;GO:0008194;GO:0009813;GO:0010224;GO:0016020;GO:0016134;GO:0046148;GO:0046283;GO:0046527;	Flavonoids		Vc29a124.18	normal	up	down	GO:0002238;GO:0008168;GO:0009805;GO:0016705;GO:0032259;GO:0046872;GO:0051213;GO:0051555;GO:0120091;GO:2000022;	Phenylpropanoids		Vc18a349.39	no	no	yes	normal	normal	up	GO:0004650;GO:0005524;GO:0005849;GO:0005975;GO:0006388;GO:0031124;GO:0051731;	carbohydrate		Vc5s297.56	normal	down	up	GO:0008194;GO:0009813;GO:0016020;GO:0016114;GO:0046148;GO:0046283;GO:0046527;	Terpenoids		Vc46p41.0	up	up	normal	GO:0004620;GO:0006629;GO:0009820;GO:0052689;	Alkaloids		Vc20a60.39	up	up	normal	GO:0006633;GO:0009409;GO:0009416;GO:0009922;GO:0016020;	Lipids
Vc33p155.13	normal	up	down	GO:0009813;GO:0045430;	Flavonoids		Vc29a16.15	up	up	normal	GO:0003854;GO:0006694;GO:0016621;	Phenylpropanoids		Vc18a367.20	yes	yes	yes	up	up	down	GO:0005975;GO:0016787;GO:0047268;GO:0047274;	carbohydrate		Vc61a7.13	down	normal	down	GO:0008661;GO:0009228;GO:0016020;GO:0016114;GO:0046872;GO:0052863;GO:0090407;GO:1901137;	Terpenoids		Vc47a7.20	normal	down	up	GO:0004497;GO:0005506;GO:0006714;GO:0016020;GO:0016115;GO:0016125;GO:0016705;GO:0020037;GO:0032787;GO:0033076;GO:0043288;GO:0044550;GO:0046164;GO:0046395;GO:0120254;GO:1901576;GO:1902644;	Alkaloids		Vc20p283.9	normal	up	down	GO:0006633;GO:0006952;GO:0009507;GO:0016790;GO:0016887;GO:0043531;GO:0051707;	Lipids
Vc35a1.21	up	up	down	GO:0005737;GO:0009058;GO:0009714;GO:0009812;GO:0016747;GO:0030638;GO:0042803;	Flavonoids		Vc29a173.18	up	up	normal	GO:0005737;GO:0006558;GO:0009074;GO:0009800;GO:0045548;GO:1902222;	Phenylpropanoids		Vc18a376.35	yes	yes	no	up	up	normal	GO:0005829;GO:0005975;GO:0006116;GO:0009331;GO:0016020;GO:0042803;GO:0046168;GO:0047952;GO:0051287;	carbohydrate		Vc6a17.36	normal	up	normal	GO:0004497;GO:0005506;GO:0016020;GO:0016114;GO:0016705;GO:0020037;GO:0044550;	Terpenoids		Vc47p164.4	normal	normal	up	GO:0006629;GO:0009820;GO:0016020;GO:0016787;	Alkaloids		Vc20p29.3	normal	down	up	GO:0005576;GO:0009791;GO:0012511;GO:0016020;GO:0019915;GO:0019953;GO:0048608;	Lipids
Vc35s201.18	up	up	normal	GO:0000166;GO:0003878;GO:0005829;GO:0006099;GO:0006633;GO:0009911;GO:0010025;GO:0015995;GO:0016109;GO:0016116;GO:0016829;GO:0019252;GO:0035639;GO:0043481;GO:0045793;GO:0045995;GO:0048366;GO:0097367;GO:0140615;	Flavonoids		Vc29a246.26	up	up	normal	GO:0002238;GO:0003676;GO:0004523;GO:0009805;GO:0016491;GO:0046872;	Phenylpropanoids		Vc18a381.28	no	yes	yes	normal	up	down	GO:0005975;GO:0006098;GO:0016020;GO:0016857;GO:0046872;	carbohydrate		Vc6a338.34	normal	normal	down	GO:0000287;GO:0010333;GO:0016102;GO:0016740;	Terpenoids		Vc48a49.41	normal	normal	down	GO:0004185;GO:0005576;GO:0005773;GO:0005829;GO:0006508;GO:0009820;GO:0016020;GO:0090377;GO:0090378;	Alkaloids		Vc20s291.21	normal	up	down	GO:0005737;GO:0006869;GO:0008289;GO:0012505;GO:0016020;GO:0043227;GO:0043228;GO:0043229;GO:0046872;	Lipids
Vc36a294.19	normal	normal	down	GO:0005737;GO:0008194;GO:0009718;GO:0016020;GO:0046527;	Flavonoids		Vc29a7.44	up	up	normal	GO:0004497;GO:0005506;GO:0009808;GO:0016020;GO:0016114;GO:0016705;GO:0020037;GO:0045548;GO:0051762;	Phenylpropanoids		Vc18p147.5	yes	yes	no	up	up	normal	GO:0016020;GO:0030246;GO:0046872;	carbohydrate		Vc6s17.38	up	up	normal	GO:0004497;GO:0005506;GO:0016020;GO:0016114;GO:0016705;GO:0020037;	Terpenoids		Vc48a57.29	up	up	normal	GO:0009820;GO:0016020;GO:0016298;	Alkaloids		Vc214s0.37	normal	down	up	GO:0004322;GO:0005737;GO:0006826;GO:0006879;GO:0006979;GO:0008198;GO:0008199;GO:0009725;GO:0009908;GO:0010039;GO:0015979;GO:0033993;GO:0043231;GO:0048366;GO:0051238;GO:0051651;GO:1901700;	Lipids
Vc36p156.4	up	up	normal	GO:0000166;GO:0003878;GO:0005829;GO:0006099;GO:0006633;GO:0009911;GO:0010025;GO:0015995;GO:0016109;GO:0016116;GO:0016829;GO:0019252;GO:0035639;GO:0043481;GO:0045793;GO:0045995;GO:0048366;GO:0097367;GO:0140615;	Flavonoids		Vc29p159.19	up	up	down	GO:0009699;GO:0048046;	Phenylpropanoids		Vc18s102.19	no	yes	no	normal	up	normal	GO:0006817;GO:0015293;GO:0016020;GO:0034219;GO:0051119;	carbohydrate		Vc6s2.45	up	up	normal	GO:0000287;GO:0010333;GO:0016102;	Terpenoids		Vc4a24.32	normal	up	down	GO:0009820;GO:0016746;GO:0016787;	Alkaloids		Vc21a150.23	up	up	normal	GO:0005789;GO:0006629;GO:0016229;GO:0016627;GO:0072330;	Lipids
Vc36p224.30	normal	up	normal	GO:0005509;GO:0008194;GO:0009718;GO:0046527;	Flavonoids		Vc2a351.33	normal	up	down	GO:0008289;GO:0016020;GO:0016616;GO:0016621;	Phenylpropanoids		Vc18s102.25	no	yes	yes	normal	down	up	GO:0006817;GO:0015293;GO:0016020;GO:0032440;GO:0034219;GO:0050896;GO:0051119;	carbohydrate		Vc70s2.31	normal	up	down	GO:0008661;GO:0009228;GO:0016020;GO:0016114;GO:0046872;GO:0052863;GO:0090407;GO:1901137;	Terpenoids		Vc4a257.18	normal	normal	down	GO:0004514;GO:0005739;GO:0009435;GO:0009611;GO:0009753;GO:0009820;GO:0034213;GO:0042179;	Alkaloids		Vc21a178.20	normal	up	normal	GO:0005783;GO:0008146;GO:0008289;GO:0016020;	Lipids
Vc36p225.11	up	up	normal	GO:0005737;GO:0008194;GO:0009813;GO:0043473;GO:0046148;GO:0046283;GO:0046527;GO:0102816;	Flavonoids		Vc2a379.38	up	up	normal	GO:0002238;GO:0009804;GO:0016705;GO:0018130;GO:0019438;GO:0044550;GO:0046872;GO:0051213;GO:1901576;	Phenylpropanoids		Vc198a1.44	no	yes	no	normal	up	normal	GO:0005634;GO:0005975;GO:0006325;GO:0006952;GO:0016020;GO:0042973;GO:0046872;	carbohydrate		Vc7a143.23	up	up	normal	GO:0005739;GO:0005829;GO:0006561;GO:0008667;GO:0009408;GO:0009414;GO:0009687;GO:0009750;GO:0010115;GO:0016020;GO:0016106;GO:0016616;GO:0042802;GO:0043289;GO:0072330;GO:0120255;GO:1902645;	Terpenoids		Vc4a28.42	normal	up	down	GO:0009820;GO:0016746;GO:0016787;	Alkaloids		Vc21a334.28	normal	down	up	GO:0003841;GO:0004623;GO:0004771;GO:0004806;GO:0005773;GO:0006641;GO:0012511;GO:0016020;GO:0016042;GO:0016301;GO:0016310;GO:0044248;GO:0045735;	Lipids
Vc36p225.9	up	normal	normal	GO:0005509;GO:0005737;GO:0008194;GO:0009801;GO:0009813;GO:0033494;GO:0046148;GO:0046278;GO:0046283;GO:0046527;	Flavonoids		Vc2a400.29	normal	up	down	GO:0002238;GO:0009805;GO:0016705;GO:0046872;GO:0051213;	Phenylpropanoids		Vc19a182.29	no	no	yes	normal	normal	down	GO:0004553;GO:0005576;GO:0005975;GO:0009057;GO:0016020;	carbohydrate		Vc7s104.21	normal	normal	down	GO:0009570;GO:0016020;GO:0016121;GO:0016124;GO:0016702;GO:0046872;	Terpenoids		Vc4s221.28	normal	down	up	GO:0009820;GO:0016020;GO:0016787;GO:0044255;	Alkaloids		Vc21p326.1	up	up	normal	GO:0002933;GO:0004497;GO:0005506;GO:0009820;GO:0016020;GO:0016705;GO:0020037;GO:0048653;GO:0051213;GO:0051792;GO:0080110;	Lipids
Vc36p99.0	normal	up	down	GO:0008194;GO:0009813;GO:0046527;	Flavonoids		Vc2a63.19	up	up	normal	GO:0003854;GO:0006694;GO:0016621;GO:0045552;	Phenylpropanoids		Vc19a235.34	no	yes	yes	normal	up	down	GO:0006817;GO:0015078;GO:0015144;GO:0015293;GO:0016020;GO:0022853;GO:0034219;GO:0050896;GO:1902600;	carbohydrate		Vc8a205.30	up	up	normal	GO:0004497;GO:0005506;GO:0016020;GO:0016114;GO:0016125;GO:0016134;GO:0016705;GO:0020037;	Terpenoids		Vc51a20.32	normal	down	up	GO:0005634;GO:0005737;GO:0009820;GO:0009939;GO:0010325;GO:0010331;GO:0010476;GO:0010629;GO:0016787;GO:0048444;GO:0048530;GO:1905516;	Alkaloids		Vc21p97.3	normal	down	up	GO:0005576;GO:0009791;GO:0012511;GO:0016020;GO:0019915;GO:0019953;GO:0048608;	Lipids
Vc36s226.33	up	normal	normal	GO:0005737;GO:0008194;GO:0009813;GO:0046148;GO:0046283;GO:0046527;GO:0102816;	Flavonoids		Vc2s416.46	up	normal	up	GO:0002238;GO:0009805;GO:0016706;GO:0031418;GO:0046872;	Phenylpropanoids		Vc19a26.20	yes	yes	yes	down	up	down	GO:0004553;GO:0005507;GO:0005975;GO:0016491;	carbohydrate		Vc8a233.19	normal	normal	up	GO:0008194;GO:0008483;GO:0009813;GO:0016114;GO:0046148;GO:0046283;GO:0046527;	Terpenoids		Vc57s9.35	normal	up	down	GO:0004497;GO:0005506;GO:0010268;GO:0016020;GO:0016125;GO:0016132;GO:0016705;GO:0020037;GO:0033075;	Alkaloids		Vc21s122.29	normal	normal	down	GO:0005096;GO:0005737;GO:0005886;GO:0006629;GO:0016717;GO:0017157;GO:0019905;GO:0045159;	Lipids
Vc37a300.34	up	up	normal	GO:0008194;GO:0009813;GO:0016020;GO:0031542;GO:0046148;GO:0046283;GO:0046527;GO:0102360;GO:0102425;GO:0102454;GO:1901038;GO:1901806;	Flavonoids		Vc302a0.32	up	up	normal	GO:0004497;GO:0005506;GO:0009808;GO:0016020;GO:0016114;GO:0016705;GO:0020037;GO:0045548;GO:0051762;	Phenylpropanoids		Vc19a311.28	yes	yes	no	up	up	normal	GO:0004553;GO:0005975;GO:0006952;GO:0016020;	carbohydrate		Vc8a371.36	normal	up	down	GO:0003735;GO:0005840;GO:0006412;GO:0008661;GO:0009228;GO:0009536;GO:0015995;GO:0016020;GO:0016114;GO:0046872;GO:0052865;GO:1990904;	Terpenoids		Vc63a5.34	normal	normal	down	GO:0009820;GO:0016020;GO:0016787;GO:0044255;	Alkaloids		Vc21s65.59	normal	normal	up	GO:0000981;GO:0003677;GO:0005634;GO:0006357;GO:0008289;	Lipids
Vc38p295.25	normal	normal	down	GO:0005739;GO:0005829;GO:0006793;GO:0008242;GO:0008460;GO:0009225;GO:0009506;GO:0010280;GO:0010315;GO:0016491;GO:0016853;GO:0030154;GO:0034654;GO:0042127;GO:0050377;GO:0051555;GO:0071555;GO:1901137;	Flavonoids		Vc30a161.25	up	up	down	GO:0004497;GO:0005506;GO:0009699;GO:0016020;GO:0016705;GO:0020037;GO:0051762;	Phenylpropanoids		Vc19p327.6	no	no	yes	normal	normal	down	GO:0004560;GO:0005975;	carbohydrate		Vc8a79.42	normal	up	normal	GO:0004497;GO:0005506;GO:0005783;GO:0009698;GO:0009813;GO:0016020;GO:0016114;GO:0016705;GO:0018130;GO:0019438;GO:0020037;GO:0042802;GO:0044550;GO:1901362;	Terpenoids		Vc644a0.5	normal	normal	down	GO:0000325;GO:0004180;GO:0005829;GO:0006508;GO:0008239;GO:0009820;GO:0016020;GO:0070008;GO:0099503;	Alkaloids		Vc22a109.15	up	normal	up	GO:0006629;GO:0009820;GO:0016787;	Lipids
Vc39p2.0	up	up	normal	GO:0008194;GO:0009813;GO:0016020;GO:0031542;GO:0046148;GO:0046283;GO:0046527;GO:0102360;GO:0102425;GO:0102454;GO:1901038;GO:1901806;	Flavonoids		Vc30a303.29	up	up	normal	GO:0005634;GO:0005783;GO:0006979;GO:0009611;GO:0009629;GO:0009699;GO:0009705;GO:0009714;GO:0009733;GO:0009753;GO:0009813;GO:0009926;GO:0010224;GO:0016210;GO:0030639;GO:0031540;GO:0034081;GO:0042181;GO:0042803;GO:0050350;GO:0102128;GO:0120255;GO:1901696;	Phenylpropanoids		Vc19s360.31	no	yes	yes	normal	up	down	GO:0005509;GO:0005576;GO:0005975;GO:0008422;GO:0009057;GO:0102483;	carbohydrate		Vc8p226.3	normal	down	up	GO:0008194;GO:0009507;GO:0009813;GO:0016020;GO:0016114;GO:0046148;GO:0046283;GO:0046527;	Terpenoids		Vc6a318.16	normal	down	up	GO:0004497;GO:0005506;GO:0016020;GO:0016705;GO:0020037;GO:0033075;	Alkaloids		Vc22a27.16	up	normal	up	GO:0000981;GO:0003677;GO:0005634;GO:0006357;GO:0008289;	Lipids
Vc3a133.27	up	up	normal	GO:0006633;GO:0009813;GO:0009922;GO:0016020;	Flavonoids		Vc30a338.22	up	up	normal	GO:0003854;GO:0006694;GO:0016621;GO:0045552;	Phenylpropanoids		Vc1a10.41	no	yes	yes	normal	up	down	GO:0005794;GO:0005975;GO:0009059;GO:0009834;GO:0016020;GO:0016740;GO:0043412;GO:0044036;GO:0046872;	carbohydrate		Vc9a132.34	normal	normal	down	GO:0000287;GO:0006952;GO:0007623;GO:0009570;GO:0010333;GO:0016102;GO:0016787;GO:0034007;GO:0034768;GO:0102701;	Terpenoids		Vc79s5.37	normal	down	up	GO:0004177;GO:0004252;GO:0006508;GO:0009820;GO:0016020;	Alkaloids		Vc22a60.28	up	up	normal	GO:0005506;GO:0008610;GO:0009924;GO:0016020;GO:0016491;GO:1990465;	Lipids
Vc3a32.25	normal	normal	up	GO:0005737;GO:0008194;GO:0009813;GO:0016020;GO:0046527;	Flavonoids		Vc30p58.9	up	up	down	GO:0008171;GO:0008757;GO:0009809;GO:0032259;GO:0102822;	Phenylpropanoids		Vc1a257.20	yes	no	no	up	normal	normal	GO:0004674;GO:0004715;GO:0005524;GO:0016310;GO:0030246;	carbohydrate		Vc9p333.2	up	up	normal	GO:0003735;GO:0005840;GO:0006412;GO:0008654;GO:0009507;GO:0010189;GO:0015979;GO:0015995;GO:0016114;GO:0033385;GO:0033519;GO:0045550;GO:0071949;GO:0102067;GO:1990904;	Terpenoids		Vc7a231.26	normal	normal	down	GO:0004177;GO:0009820;GO:0016020;GO:0016298;GO:0016746;GO:0052689;	Alkaloids		Vc22a7.22	normal	down	up	GO:0006629;GO:0008970;GO:0009820;GO:0016020;GO:0047714;GO:0102549;	Lipids
Vc3a334.17	up	up	down	GO:0009058;GO:0009714;GO:0009812;GO:0016747;GO:0030638;GO:0042803;	Flavonoids		Vc30s301.50	normal	normal	down	GO:0003987;GO:0005524;GO:0005737;GO:0006631;GO:0009698;GO:0016207;GO:0016208;GO:0019427;GO:0043231;GO:0106290;	Phenylpropanoids		Vc1a293.20	no	yes	yes	normal	up	down	GO:0005975;GO:0006979;GO:0046872;GO:0047268;GO:0047274;GO:0052692;GO:1901575;	carbohydrate		Vc9s134.43	normal	down	normal	GO:0000287;GO:0009570;GO:0009685;GO:0010333;GO:0016020;GO:0016102;GO:0016740;GO:0046394;	Terpenoids		Vc7a297.28	normal	up	down	GO:0000325;GO:0004180;GO:0005829;GO:0006508;GO:0008239;GO:0009820;GO:0016020;GO:0070008;GO:0099503;	Alkaloids		Vc22a77.23	normal	up	down	GO:0000166;GO:0003989;GO:0006633;GO:0008270;GO:0009317;GO:0009507;GO:0016743;GO:0035639;GO:0097367;	Lipids
Vc3a382.28	up	up	normal	GO:0003854;GO:0006694;GO:0016621;GO:0045552;	Flavonoids		Vc31a324.32	normal	up	down	GO:0002238;GO:0004386;GO:0009805;GO:0009813;GO:0016491;GO:0031418;GO:0043473;GO:0046872;	Phenylpropanoids		Vc1a344.38	no	yes	yes	normal	down	up	GO:0005886;GO:0005975;GO:0009653;GO:0016630;GO:0031179;	carbohydrate		Vc9s266.31	up	up	normal	GO:0000166;GO:0003878;GO:0005829;GO:0006099;GO:0006633;GO:0009911;GO:0010025;GO:0015995;GO:0016109;GO:0016116;GO:0016829;GO:0019252;GO:0043481;GO:0045793;GO:0045995;GO:0048366;GO:0140615;	Terpenoids		Vc7a307.20	normal	down	up	GO:0008171;GO:0008757;GO:0009809;GO:0009820;GO:0032259;	Alkaloids		Vc22p146.0	normal	down	up	GO:0008289;	Lipids
Vc3p222.3	up	normal	up	GO:0009718;GO:0047213;	Flavonoids		Vc31s35.41	normal	normal	up	GO:0008171;GO:0008757;GO:0009809;GO:0009820;GO:0032259;	Phenylpropanoids		Vc1a430.38	yes	yes	no	up	up	normal	GO:0004674;GO:0005524;GO:0005886;GO:0016310;GO:0030246;GO:0031625;GO:0048544;GO:0106310;	carbohydrate							Terpenoids		Vc7s205.19	normal	up	down	GO:0009820;GO:0016020;GO:0016787;	Alkaloids		Vc22p160.2	up	up	normal	GO:0004620;GO:0006629;GO:0009820;GO:0052689;	Lipids
Vc3p423.0	normal	down	up	GO:0008194;GO:0009813;GO:0046148;GO:0046283;GO:0046527;	Flavonoids		Vc32a159.26	up	up	down	GO:0004497;GO:0005506;GO:0009699;GO:0016020;GO:0016705;GO:0020037;GO:0051762;	Phenylpropanoids		Vc1a69.26	yes	yes	no	up	up	normal	GO:0003825;GO:0004805;GO:0006817;GO:0008519;GO:0009055;GO:0009414;GO:0009651;GO:0009737;GO:0015078;GO:0015145;GO:0015293;GO:0015749;GO:0016020;GO:0022853;GO:0022900;GO:0071944;GO:0072488;	carbohydrate							Terpenoids		Vc7s245.25	normal	normal	up	GO:0004177;GO:0004252;GO:0006508;GO:0009820;	Alkaloids		Vc22p22.7	normal	up	normal	GO:0016042;	Lipids
Vc3s209.28	normal	up	normal	GO:0000325;GO:0005774;GO:0010023;GO:0010162;GO:0015078;GO:0015297;GO:0022853;GO:0042910;GO:0097437;GO:1902600;GO:1990961;	Flavonoids		Vc32a297.40	up	up	down	GO:0003854;GO:0006694;GO:0016621;GO:0045552;	Phenylpropanoids		Vc1p420.2	no	yes	yes	normal	down	up	GO:0005886;GO:0005975;GO:0009787;GO:0010231;GO:0010427;GO:0016630;GO:0031179;	carbohydrate							Terpenoids		Vc8a85.28	normal	up	down	GO:0004497;GO:0005506;GO:0006633;GO:0006952;GO:0009707;GO:0016125;GO:0016705;GO:0016829;GO:0020037;GO:0031408;GO:0033075;	Alkaloids		Vc22p59.6	up	up	down	GO:0005506;GO:0005789;GO:0006950;GO:0008610;GO:0009628;GO:0009719;GO:0009924;GO:0010033;GO:0016491;GO:1901700;GO:1990465;	Lipids
Vc40a5.27	up	normal	up	GO:0008194;GO:0009813;GO:0046527;	Flavonoids		Vc32a318.21	up	up	normal	GO:0005634;GO:0005783;GO:0006979;GO:0009611;GO:0009629;GO:0009699;GO:0009705;GO:0009714;GO:0009733;GO:0009753;GO:0009813;GO:0009926;GO:0010224;GO:0016210;GO:0030639;GO:0031540;GO:0034081;GO:0042181;GO:0042803;GO:0050350;GO:0102128;GO:0120255;GO:1901696;	Phenylpropanoids		Vc1p428.27	yes	yes	no	up	up	normal	GO:0003955;GO:0004674;GO:0005524;GO:0010181;GO:0016020;GO:0016310;GO:0030246;GO:0048544;GO:0051707;GO:0071944;GO:0106310;	carbohydrate							Terpenoids		Vc8s194.35	normal	down	up	GO:0004177;GO:0004252;GO:0006508;GO:0009820;	Alkaloids		Vc22s240.29	up	up	normal	GO:0006629;GO:0006637;GO:0010345;GO:0016020;GO:0043231;GO:0080019;GO:0102965;	Lipids
Vc40p195.0	normal	down	up	GO:0008194;GO:0009636;GO:0009809;GO:0009813;GO:0016020;GO:0042178;GO:0046148;GO:0046283;GO:0046527;	Flavonoids		Vc32p21.11	normal	up	down	GO:0008171;GO:0008757;GO:0009809;GO:0032259;GO:0102822;	Phenylpropanoids		Vc1s112.22	no	yes	yes	normal	up	down	GO:0004335;GO:0005524;GO:0005829;GO:0006012;GO:0009702;GO:0019566;GO:0046835;	carbohydrate							Terpenoids		Vc9a263.26	normal	up	down	GO:0009820;GO:0016020;GO:0016787;	Alkaloids		Vc23a33.25	normal	up	down	GO:0004630;GO:0005509;GO:0016020;GO:0016042;GO:0044248;GO:0046434;GO:0046470;GO:0070290;GO:0071944;	Lipids
Vc40p195.2	normal	down	up	GO:0005783;GO:0008194;GO:0009813;GO:0016020;GO:0046148;GO:0046283;GO:0046527;	Flavonoids		Vc33a169.12	up	up	normal	GO:0005737;GO:0006558;GO:0007623;GO:0009074;GO:0009800;GO:0045548;GO:1902222;	Phenylpropanoids		Vc1s432.37	no	no	yes	normal	normal	down	GO:0004553;GO:0005975;	carbohydrate							Terpenoids		Vc9a352.38	normal	up	down	GO:0005507;GO:0005524;GO:0005777;GO:0006811;GO:0009308;GO:0009719;GO:0009820;GO:0042179;GO:0042221;GO:0048038;GO:0050232;GO:0052593;GO:0052594;GO:0052596;GO:1901565;	Alkaloids		Vc23a360.28	normal	up	normal	GO:0006633;GO:0009694;GO:0010181;GO:0016491;GO:0031408;	Lipids
Vc40s195.20	normal	down	up	GO:0008194;GO:0009813;GO:0046148;GO:0046283;GO:0046527;	Flavonoids		Vc33a226.20	up	up	normal	GO:0005576;GO:0005773;GO:0006979;GO:0009505;GO:0009809;GO:0010089;GO:0016020;GO:0020037;GO:0031328;GO:0042744;GO:0046872;GO:0098869;GO:0140825;GO:1900378;GO:1901428;	Phenylpropanoids		Vc20a352.37	yes	yes	no	up	up	normal	GO:0004650;GO:0004864;GO:0005737;GO:0005886;GO:0005975;GO:0009738;GO:0016829;GO:0047911;	carbohydrate							Terpenoids		Vc9a7.35	normal	up	down	GO:0009820;GO:0016746;GO:0016787;	Alkaloids		Vc23s108.36	normal	normal	down	GO:0004630;GO:0005515;GO:0005546;GO:0005737;GO:0005886;GO:0006644;GO:0006865;GO:0009506;GO:0016042;GO:0042742;GO:0044248;GO:0046434;GO:0046486;GO:0046872;GO:0070290;GO:1901564;	Lipids
Vc40s32.49	normal	up	down	GO:0005515;GO:0005634;GO:0005838;GO:0006508;GO:0009408;GO:0009647;GO:0009733;GO:0009735;GO:0009755;GO:0009908;GO:0009941;GO:0016020;GO:0030163;GO:0031540;GO:0043248;GO:0043632;GO:0048528;GO:0048825;GO:0051788;	Flavonoids		Vc33a278.40	normal	down	up	GO:0002238;GO:0003922;GO:0006177;GO:0009805;GO:0016491;GO:0046872;GO:0048767;	Phenylpropanoids		Vc20a353.15	yes	no	yes	up	normal	up	GO:0005576;GO:0008810;GO:0016020;GO:0030245;GO:0030246;	carbohydrate							Terpenoids		Vc9s176.15	normal	down	up	GO:0009820;GO:0016787;GO:0044255;	Alkaloids		Vc23s342.34	normal	up	down	GO:0006633;GO:0009922;GO:0016020;	Lipids
Vc41a69.20	normal	normal	down	GO:0005737;GO:0008194;GO:0009813;GO:0046148;GO:0046283;GO:0046527;	Flavonoids		Vc33a61.31	up	up	normal	GO:0002238;GO:0009805;GO:0016491;GO:0031418;GO:0046872;	Phenylpropanoids		Vc20a93.19	no	no	yes	normal	normal	down	GO:0005975;GO:0016853;GO:0097367;GO:1901135;	carbohydrate							Terpenoids							Alkaloids		Vc24a110.27	normal	down	up	GO:0006629;GO:0008374;GO:0016020;	Lipids
Vc42a14.30	up	up	normal	GO:0005634;GO:0005783;GO:0006979;GO:0009611;GO:0009629;GO:0009699;GO:0009705;GO:0009714;GO:0009733;GO:0009753;GO:0009813;GO:0009926;GO:0010224;GO:0016747;GO:0016853;GO:0030639;GO:0031540;GO:0034081;GO:0042181;GO:0042803;GO:0120255;GO:1901696;	Flavonoids		Vc33p213.10	normal	up	down	GO:0002238;GO:0008168;GO:0009805;GO:0016705;GO:0031418;GO:0032259;GO:0046872;GO:0051213;GO:0120091;GO:2000022;	Phenylpropanoids		Vc20a97.28	no	no	yes	normal	normal	up	GO:0005829;GO:0005975;GO:0006098;GO:0016020;GO:0016853;GO:0017057;	carbohydrate							Terpenoids							Alkaloids		Vc24a179.19	normal	down	up	GO:0000981;GO:0003677;GO:0005634;GO:0006357;GO:0008289;	Lipids
Vc42a40.30	normal	down	up	GO:0008194;GO:0009813;GO:0016020;GO:0046527;	Flavonoids		Vc33p299.18	up	up	normal	GO:0003854;GO:0006694;GO:0016621;	Phenylpropanoids		Vc20p342.8	no	yes	yes	normal	down	up	GO:0005524;GO:0005975;GO:0016020;GO:0016887;GO:0055085;GO:0140359;	carbohydrate							Terpenoids							Alkaloids		Vc24a191.24	normal	down	normal	GO:0004190;GO:0006508;GO:0006629;GO:0016020;	Lipids
Vc42p20.3	up	up	normal	GO:0009813;GO:0016491;GO:0031418;GO:0043473;GO:0046872;	Flavonoids		Vc33p307.8	up	up	normal	GO:0004497;GO:0005506;GO:0009808;GO:0016020;GO:0016114;GO:0016705;GO:0020037;GO:0045548;GO:0051762;	Phenylpropanoids		Vc20p343.1	no	yes	yes	normal	down	up	GO:0000139;GO:0005975;GO:0006486;GO:0016758;GO:0030246;GO:0047938;	carbohydrate							Terpenoids							Alkaloids		Vc24a326.22	up	up	normal	GO:0004620;GO:0004806;GO:0006629;GO:0009507;GO:0009820;GO:0047714;	Lipids
Vc42p262.6	normal	up	down	GO:0008171;GO:0008757;GO:0009809;GO:0032259;GO:0102822;	Flavonoids		Vc33p61.8	up	up	normal	GO:0002238;GO:0009805;GO:0016491;GO:0031418;GO:0046872;	Phenylpropanoids		Vc20s33.52	no	no	yes	normal	normal	down	GO:0005975;GO:0015925;GO:0016020;	carbohydrate							Terpenoids							Alkaloids		Vc24a329.18	up	up	up	GO:0006633;GO:0009922;GO:0016020;GO:0090377;	Lipids
Vc42p96.9	normal	up	normal	GO:0006720;GO:0009718;GO:0016020;GO:0045552;GO:0047890;	Flavonoids		Vc33s291.32	normal	up	down	GO:0002238;GO:0009805;GO:0016491;GO:0031418;GO:0046872;	Phenylpropanoids		Vc20s376.32	yes	yes	no	up	up	normal	GO:0005975;GO:0006952;GO:0016020;GO:0016798;GO:0051537;	carbohydrate							Terpenoids							Alkaloids		Vc24a45.33	up	up	normal	GO:0016020;GO:0016491;GO:0020037;GO:0042761;GO:0043231;GO:0043447;GO:0046872;	Lipids
Vc43a262.25	normal	up	normal	GO:0005515;GO:0005634;GO:0005838;GO:0006508;GO:0009408;GO:0009647;GO:0009733;GO:0009735;GO:0009755;GO:0009908;GO:0009941;GO:0030163;GO:0031540;GO:0043248;GO:0043632;GO:0048528;GO:0048825;GO:0051788;	Flavonoids		Vc34a21.31	up	up	normal	GO:0008152;GO:0008422;GO:0016020;GO:0016719;GO:0016788;GO:0052886;GO:0052887;GO:0102483;	Phenylpropanoids		Vc20s7.30	no	no	yes	normal	normal	up	GO:0002229;GO:0005777;GO:0005829;GO:0005975;GO:0006098;GO:0009507;GO:0016740;GO:0016853;GO:0017057;GO:0042128;GO:0042742;GO:0071461;	carbohydrate							Terpenoids							Alkaloids		Vc24p75.13	normal	up	down	GO:0005576;GO:0016020;GO:0017040;GO:0042759;GO:0046512;GO:0046514;GO:0102121;	Lipids
Vc43a80.33	normal	up	down	GO:0008194;GO:0009813;GO:0046527;	Flavonoids		Vc34a229.41	normal	up	down	GO:0005576;GO:0008422;GO:0009044;GO:0016020;GO:0031222;GO:0045493;GO:0046556;GO:0102483;	Phenylpropanoids		Vc21a106.20	no	yes	yes	normal	down	up	GO:0005975;GO:0009331;GO:0009627;GO:0045017;GO:0046168;GO:0047952;GO:0051287;	carbohydrate							Terpenoids							Alkaloids		Vc25a184.27	normal	down	up	GO:0005576;GO:0006629;GO:0016020;GO:0016788;GO:1901575;	Lipids
Vc43a85.25	normal	up	down	GO:0008194;GO:0009813;GO:0046527;	Flavonoids		Vc34a78.26	normal	up	normal	GO:0005737;GO:0009698;GO:0016020;GO:0016405;GO:0016491;GO:0016878;	Phenylpropanoids		Vc21a22.26	no	yes	yes	normal	up	down	GO:0006817;GO:0008643;GO:0016020;GO:0022857;GO:0032440;GO:0032981;GO:0050896;GO:0055085;	carbohydrate							Terpenoids							Alkaloids		Vc25a245.28	up	up	normal	GO:0006633;GO:0009813;GO:0009922;GO:0016020;	Lipids
Vc43a92.28	normal	up	down	GO:0008194;GO:0009813;GO:0046527;	Flavonoids		Vc34p34.5	normal	normal	down	GO:0080037;GO:2000762;	Phenylpropanoids		Vc21a31.19	yes	no	no	up	normal	normal	GO:0002229;GO:0005777;GO:0005829;GO:0005975;GO:0006098;GO:0009507;GO:0016740;GO:0016853;GO:0017057;GO:0042128;GO:0042742;GO:0071461;	carbohydrate							Terpenoids							Alkaloids		Vc25a249.23	up	up	normal	GO:0005576;GO:0006629;GO:0016020;GO:0016298;GO:1901575;	Lipids
Vc43p85.5	normal	up	down	GO:0008194;GO:0009813;	Flavonoids		Vc34p57.9	up	up	normal	GO:0005524;GO:0005737;GO:0008270;GO:0009611;GO:0009698;GO:0009753;GO:0016020;GO:0016207;GO:0016491;GO:0016740;GO:0050563;GO:0106286;GO:0106290;	Phenylpropanoids		Vc21a317.34	no	yes	yes	normal	up	down	GO:0005459;GO:0005460;GO:0005794;GO:0008168;GO:0008643;GO:0015297;GO:0015786;GO:0016020;GO:0032259;GO:0048527;GO:0072334;GO:0080147;	carbohydrate							Terpenoids							Alkaloids		Vc25a318.31	up	normal	up	GO:0006633;GO:0009922;GO:0016020;	Lipids
Vc46a11.23	up	up	normal	GO:0002238;GO:0007033;GO:0009611;GO:0009718;GO:0009753;GO:0009805;GO:0010023;GO:0016705;GO:0031418;GO:0046872;GO:0051213;	Flavonoids		Vc34s139.31	up	up	down	GO:0008171;GO:0008757;GO:0009809;GO:0032259;GO:0046872;	Phenylpropanoids		Vc21a51.39	yes	yes	no	up	up	normal	GO:0004650;GO:0005975;GO:0016020;GO:0016829;GO:0047911;	carbohydrate							Terpenoids							Alkaloids		Vc25p250.8	up	up	normal	GO:0006633;GO:0009922;GO:0016020;	Lipids
Vc46p72.6	normal	up	down	GO:0008194;GO:0008299;GO:0009813;GO:0046148;GO:0046283;GO:0046527;	Flavonoids		Vc35p293.6	normal	up	down	GO:0003854;GO:0006694;GO:0016621;	Phenylpropanoids		Vc21a8.22	yes	yes	no	up	up	normal	GO:0004565;GO:0005773;GO:0005975;GO:0016020;GO:0030246;	carbohydrate							Terpenoids							Alkaloids		Vc25p41.0	up	normal	up	GO:0000981;GO:0003677;GO:0005634;GO:0006357;GO:0008289;	Lipids
Vc46p76.4	normal	up	down	GO:0008194;GO:0008299;GO:0009813;GO:0046148;GO:0046283;GO:0046527;	Flavonoids		Vc35s249.43	normal	normal	down	GO:0005737;GO:0009698;GO:0016020;GO:0016207;GO:0106290;	Phenylpropanoids		Vc21a85.21	no	yes	yes	normal	up	down	GO:0000325;GO:0004564;GO:0005576;GO:0005775;GO:0005975;GO:0009414;GO:0009617;GO:0009651;GO:0009737;GO:0009755;GO:0016020;GO:0030246;GO:0071370;GO:0097306;	carbohydrate							Terpenoids							Alkaloids		Vc25p7.1	normal	up	down	GO:0006629;GO:0016020;GO:0016491;	Lipids
Vc47a120.32	normal	up	down	GO:0008194;GO:0009813;GO:0046527;	Flavonoids		Vc36a33.15	up	up	normal	GO:0006694;GO:0016229;GO:0016616;GO:0016621;	Phenylpropanoids		Vc21p27.11	no	yes	yes	normal	up	down	GO:0002239;GO:0004672;GO:0004888;GO:0005524;GO:0007178;GO:0009617;GO:0016020;GO:0016310;GO:0030246;GO:0071944;GO:0098542;	carbohydrate							Terpenoids							Alkaloids		Vc269p0.23	up	up	normal	GO:0006633;GO:0009922;GO:0016020;	Lipids
Vc48a105.37	up	up	normal	GO:0008171;GO:0008757;GO:0009809;GO:0009813;GO:0032259;GO:0046983;GO:0102084;GO:0102938;	Flavonoids		Vc36p33.3	normal	up	down	GO:0006720;GO:0016616;GO:0016621;	Phenylpropanoids		Vc21s103.37	no	no	yes	normal	normal	down	GO:0005524;GO:0005975;GO:0006720;GO:0008270;GO:0016301;GO:0016310;GO:0016491;	carbohydrate							Terpenoids							Alkaloids		Vc26a129.42	normal	up	down	GO:0004435;GO:0005886;GO:0016042;GO:0035556;GO:0051209;	Lipids
Vc48a94.41	normal	up	normal	GO:0009555;GO:0009812;GO:0009901;GO:0015297;GO:0016020;GO:0042908;GO:0042910;GO:0098754;GO:0140115;	Flavonoids		Vc36s283.39	normal	normal	down	GO:0002238;GO:0009805;GO:0016491;GO:0046872;	Phenylpropanoids		Vc21s109.39	no	no	yes	normal	normal	down	GO:0005975;GO:0015925;GO:0016020;	carbohydrate							Terpenoids							Alkaloids		Vc26a179.20	normal	up	down	GO:0005783;GO:0008146;GO:0008289;GO:0016020;	Lipids
Vc48p74.12	down	normal	down	GO:0005737;GO:0008194;GO:0009813;GO:0016758;GO:0046148;GO:0046283;	Flavonoids		Vc374s0.33	up	up	normal	GO:0008171;GO:0008757;GO:0009809;GO:0032259;GO:0046872;	Phenylpropanoids		Vc221p1.6	no	yes	yes	normal	up	down	GO:0004553;GO:0005975;GO:0009057;	carbohydrate							Terpenoids							Alkaloids		Vc26a236.28	normal	down	up	GO:0006629;GO:0016020;GO:0016788;	Lipids
Vc48s55.35	up	up	normal	GO:0008194;GO:0009813;GO:0031542;GO:0046148;GO:0046283;GO:0046527;GO:1901038;GO:1901806;	Flavonoids		Vc37a253.25	normal	up	normal	GO:0005886;GO:0006720;GO:0008270;GO:0009617;GO:0009809;GO:0010597;GO:0016616;	Phenylpropanoids		Vc22a263.37	no	yes	yes	normal	down	up	GO:0004565;GO:0005773;GO:0005975;GO:0016020;GO:0030246;	carbohydrate							Terpenoids							Alkaloids		Vc26a29.34	normal	up	down	GO:0005634;GO:0005773;GO:0008289;GO:0016020;	Lipids
Vc4p104.3	up	up	normal	GO:0005737;GO:0009058;GO:0009714;GO:0009812;GO:0016747;GO:0030638;GO:0042803;	Flavonoids		Vc37a253.26	normal	normal	up	GO:0008270;GO:0009809;GO:0016616;GO:0031320;	Phenylpropanoids		Vc22a291.34	no	yes	no	normal	up	normal	GO:0000325;GO:0004553;GO:0005576;GO:0005975;GO:0009057;	carbohydrate							Terpenoids							Alkaloids		Vc26p95.5	normal	down	up	GO:0005576;GO:0009791;GO:0012511;GO:0016020;GO:0019915;GO:0019953;GO:0048608;	Lipids
Vc4p123.16	up	up	normal	GO:0005737;GO:0008194;GO:0009813;GO:0043473;GO:0046148;GO:0046283;GO:0046527;GO:0102816;	Flavonoids		Vc37a254.28	normal	down	normal	GO:0000166;GO:0008270;GO:0009809;GO:0016616;GO:0016740;GO:0031320;	Phenylpropanoids		Vc22a355.22	no	no	yes	normal	normal	down	GO:0000325;GO:0004672;GO:0005515;GO:0005524;GO:0005829;GO:0006817;GO:0006829;GO:0016020;GO:0032440;GO:0034219;GO:0050896;GO:0051119;	carbohydrate							Terpenoids							Alkaloids		Vc26s126.29	normal	normal	down	GO:0005096;GO:0005737;GO:0005886;GO:0006629;GO:0016717;GO:0017157;GO:0019905;GO:0045159;	Lipids
Vc4p123.4	up	normal	normal	GO:0005737;GO:0008194;GO:0009813;GO:0046527;	Flavonoids		Vc37a254.29	normal	down	up	GO:0009809;GO:0016616;	Phenylpropanoids		Vc22p126.3	yes	yes	no	up	up	normal	GO:0004674;GO:0005337;GO:0005524;GO:0016020;GO:0016310;GO:0030246;GO:0031625;GO:0048544;GO:0051707;GO:0071944;GO:0106310;GO:1901642;	carbohydrate							Terpenoids							Alkaloids		Vc26s128.28	normal	up	down	GO:0004315;GO:0006633;GO:0033818;	Lipids
Vc4s297.30	up	up	normal	GO:0000166;GO:0003878;GO:0005829;GO:0006099;GO:0006633;GO:0009911;GO:0010025;GO:0015995;GO:0016109;GO:0016116;GO:0016829;GO:0019252;GO:0035639;GO:0043481;GO:0045793;GO:0045995;GO:0048366;GO:0097367;GO:0140615;	Flavonoids		Vc37a289.46	normal	up	down	GO:0003854;GO:0006694;GO:0016621;	Phenylpropanoids		Vc22p147.6	no	no	yes	normal	normal	up	GO:0004386;GO:0005739;GO:0016020;GO:0016301;GO:0016310;GO:0030246;	carbohydrate							Terpenoids							Alkaloids		Vc27a274.27	normal	down	up	GO:0004303;GO:0004316;GO:0005811;GO:0005829;GO:0008202;GO:0008610;GO:0009507;GO:0016020;GO:0070523;GO:0070524;GO:0072582;GO:0102196;GO:1901362;	Lipids
Vc530p0.4	normal	normal	down	GO:0005739;GO:0005829;GO:0006793;GO:0008242;GO:0008460;GO:0009225;GO:0009506;GO:0010280;GO:0010315;GO:0016491;GO:0016853;GO:0030154;GO:0034654;GO:0042127;GO:0050377;GO:0051555;GO:0071555;GO:1901137;	Flavonoids		Vc37a300.34	up	up	normal	GO:0008194;GO:0009813;GO:0016020;GO:0031542;GO:0046148;GO:0046283;GO:0046527;GO:0102360;GO:0102425;GO:0102454;GO:1901038;GO:1901806;	Phenylpropanoids		Vc22p271.9	yes	yes	no	up	up	normal	GO:0004553;GO:0005975;GO:0016020;	carbohydrate							Terpenoids							Alkaloids		Vc27a274.28	up	up	normal	GO:0005811;GO:0005829;GO:0008202;GO:0008610;GO:0009507;GO:0016020;GO:0016491;GO:1901362;	Lipids
Vc552s0.9	down	up	down	GO:0005737;GO:0008194;GO:0009636;GO:0009801;GO:0009813;GO:0033494;GO:0046148;GO:0046278;GO:0046283;GO:0046527;	Flavonoids		Vc37s211.34	normal	up	down	GO:0003755;GO:0004801;GO:0005737;GO:0005975;GO:0006098;GO:0009749;GO:0009809;GO:0016020;GO:0043231;	Phenylpropanoids		Vc22s10.50	no	yes	yes	normal	up	down	GO:0005737;GO:0005975;GO:0016020;GO:0030246;GO:0047938;	carbohydrate							Terpenoids							Alkaloids		Vc27a303.29	normal	down	up	GO:0000038;GO:0000160;GO:0005789;GO:0006633;GO:0009579;GO:0009644;GO:0009979;GO:0016717;GO:0031408;GO:0031969;GO:0033559;GO:0043155;	Lipids
Vc5a268.35	normal	down	up	GO:0008194;GO:0009813;GO:0016020;GO:0016114;GO:0046148;GO:0046283;GO:0046527;	Flavonoids		Vc38a282.41	normal	up	down	GO:0001676;GO:0004467;GO:0005783;GO:0009698;GO:0016020;GO:0016207;GO:0106290;	Phenylpropanoids		Vc22s132.37	no	yes	yes	normal	up	down	GO:0005794;GO:0008643;GO:0015297;GO:0016020;GO:0055085;	carbohydrate							Terpenoids							Alkaloids		Vc27a304.51	normal	up	down	GO:0004630;GO:0005509;GO:0005773;GO:0005783;GO:0009536;GO:0016020;GO:0016042;GO:0016779;GO:0044248;GO:0046434;GO:0046470;GO:0070290;GO:0071944;	Lipids
Vc5a295.31	normal	down	up	GO:0005829;GO:0008194;GO:0009813;GO:0016020;GO:0016114;GO:0046148;GO:0046283;GO:0046527;	Flavonoids		Vc38a291.14	up	normal	up	GO:0002238;GO:0009804;GO:0016020;GO:0016705;GO:0018130;GO:0019438;GO:0044550;GO:0046872;GO:0051213;GO:1901576;	Phenylpropanoids		Vc22s92.38	no	yes	no	normal	down	normal	GO:0005829;GO:0005975;GO:0006116;GO:0006720;GO:0009331;GO:0046168;GO:0047952;GO:0051287;	carbohydrate							Terpenoids							Alkaloids		Vc27a6.25	up	up	normal	GO:0006869;GO:0008289;GO:0016491;	Lipids
Vc5a295.34	normal	down	up	GO:0008194;GO:0009813;GO:0016020;GO:0016114;GO:0046148;GO:0046283;GO:0046527;	Flavonoids		Vc38a60.23	normal	up	normal	GO:0008270;GO:0009809;GO:0016616;GO:0031320;	Phenylpropanoids		Vc237a0.44	no	yes	yes	normal	up	down	GO:0000138;GO:0005515;GO:0005768;GO:0005802;GO:0005975;GO:0016020;GO:0033481;GO:0050378;GO:0050829;GO:0050832;GO:1901566;	carbohydrate							Terpenoids							Alkaloids		Vc27s155.36	normal	down	up	GO:0005789;GO:0006629;GO:0140042;	Lipids
Vc5a297.44	normal	down	up	GO:0005829;GO:0008194;GO:0009813;GO:0016020;GO:0016114;GO:0046148;GO:0046283;GO:0046527;	Flavonoids		Vc38s101.15	up	up	normal	GO:0005524;GO:0005737;GO:0007623;GO:0008270;GO:0009698;GO:0010597;GO:0016207;GO:0016491;GO:0016740;GO:0018858;GO:0019438;GO:0033494;GO:0042537;GO:0050563;GO:0052315;GO:0072330;GO:0106286;GO:0106290;GO:0120255;GO:1901362;	Phenylpropanoids		Vc23a240.13	no	yes	yes	normal	up	down	GO:0003825;GO:0004805;GO:0006817;GO:0008519;GO:0015145;GO:0015293;GO:0015749;GO:0016020;GO:0032440;GO:0050896;GO:0072488;	carbohydrate							Terpenoids							Alkaloids		Vc27s241.37	up	up	normal	GO:0005634;GO:0006629;GO:0006952;	Lipids
Vc5p267.10	normal	down	up	GO:0008194;GO:0009813;GO:0016020;GO:0046872;	Flavonoids		Vc38s2.56	up	up	normal	GO:0003676;GO:0004523;GO:0005507;GO:0016020;GO:0046274;GO:0048046;GO:0052716;	Phenylpropanoids		Vc23a288.26	no	yes	yes	normal	up	down	GO:0004856;GO:0005524;GO:0005829;GO:0005997;GO:0042732;GO:0046835;GO:1990904;	carbohydrate							Terpenoids							Alkaloids		Vc27s329.41	normal	down	up	GO:0004806;GO:0006629;	Lipids
Vc5s297.56	normal	down	up	GO:0008194;GO:0009813;GO:0016020;GO:0016114;GO:0046148;GO:0046283;GO:0046527;	Flavonoids		Vc39a12.37	normal	up	down	GO:0003854;GO:0006694;GO:0016621;	Phenylpropanoids		Vc23a312.35	no	yes	yes	normal	up	down	GO:0016020;GO:0030246;GO:0098609;	carbohydrate							Terpenoids							Alkaloids		Vc28a1.25	normal	normal	up	GO:0003676;GO:0004523;GO:0005634;GO:0008289;GO:0016020;GO:0016757;	Lipids
Vc5s373.33	down	normal	down	GO:0006793;GO:0008460;GO:0009225;GO:0010280;GO:0010315;GO:0016020;GO:0034654;GO:0050377;GO:0051555;GO:1901137;	Flavonoids		Vc39a61.32	up	normal	up	GO:0008270;GO:0009809;GO:0016616;	Phenylpropanoids		Vc23a340.25	no	yes	no	normal	up	normal	GO:0008643;GO:0016020;	carbohydrate							Terpenoids							Alkaloids		Vc28a136.10	normal	down	up	GO:0003677;GO:0003700;GO:0005634;GO:0006355;GO:0008289;GO:0016020;GO:0030154;	Lipids
Vc7a85.37	normal	up	normal	GO:0008194;GO:0009718;GO:0046527;	Flavonoids		Vc39p2.0	up	up	normal	GO:0008194;GO:0009813;GO:0016020;GO:0031542;GO:0046148;GO:0046283;GO:0046527;GO:0102360;GO:0102425;GO:0102454;GO:1901038;GO:1901806;	Phenylpropanoids		Vc23a347.25	no	yes	yes	normal	up	down	GO:0001678;GO:0004396;GO:0005524;GO:0005536;GO:0005739;GO:0005829;GO:0006096;GO:0009570;GO:0019318;GO:0030122;GO:0035615;GO:0046835;GO:0051156;GO:0072583;	carbohydrate							Terpenoids							Alkaloids		Vc28a159.23	up	up	normal	GO:0005504;GO:0009627;	Lipids
Vc7p48.23	normal	up	down	GO:0002238;GO:0004386;GO:0009805;GO:0009813;GO:0016491;GO:0031418;GO:0043473;GO:0046872;	Flavonoids		Vc3a213.23	normal	down	up	GO:0008270;GO:0009809;GO:0016020;GO:0016616;GO:0031320;	Phenylpropanoids		Vc23a77.28	no	no	yes	normal	normal	down	GO:0005524;GO:0005737;GO:0006012;GO:0016301;GO:0016773;GO:0046396;GO:0046835;GO:0046872;	carbohydrate							Terpenoids							Alkaloids		Vc28a206.36	normal	down	up	GO:0005576;GO:0006629;GO:0016020;GO:0016298;GO:1901575;	Lipids
Vc7s397.42	up	up	normal	GO:0005504;GO:0006631;GO:0009570;GO:0009813;GO:0016872;	Flavonoids		Vc3a29.38	up	up	up	GO:0002238;GO:0009804;GO:0016705;GO:0018130;GO:0019438;GO:0044550;GO:0046872;GO:0051213;GO:1901576;	Phenylpropanoids		Vc23a93.31	yes	yes	yes	up	up	down	GO:0004553;GO:0005576;GO:0005975;GO:0016020;GO:0061783;	carbohydrate							Terpenoids							Alkaloids		Vc28a219.27	up	up	normal	GO:0006633;GO:0009922;GO:0016020;	Lipids
Vc8a233.19	normal	normal	up	GO:0008194;GO:0008483;GO:0009813;GO:0016114;GO:0046148;GO:0046283;GO:0046527;	Flavonoids		Vc3a382.28	up	up	normal	GO:0003854;GO:0006694;GO:0016621;GO:0045552;	Phenylpropanoids		Vc23p16.4	no	yes	yes	normal	up	down	GO:0004568;GO:0005975;GO:0006032;GO:0008061;GO:0016020;GO:0016998;GO:0050832;	carbohydrate							Terpenoids							Alkaloids		Vc28a264.26	normal	normal	up	GO:0003746;GO:0003924;GO:0005525;GO:0005634;GO:0005829;GO:0005840;GO:0006397;GO:0006414;GO:0006629;GO:0008380;GO:0009536;GO:0016298;GO:0030623;GO:0120114;GO:1902494;GO:1990904;	Lipids
Vc8a233.20	normal	up	down	GO:0008194;GO:0008483;GO:0009813;GO:0046148;GO:0046283;GO:0046527;	Flavonoids		Vc3s6.50	up	normal	up	GO:0002238;GO:0009805;GO:0016705;GO:0046872;GO:0051213;	Phenylpropanoids		Vc23p169.3	no	no	yes	normal	normal	up	GO:0004693;GO:0005794;GO:0008643;GO:0015120;GO:0015297;GO:0015605;GO:0015713;GO:0015748;GO:0031969;GO:0051726;GO:1901264;GO:1901505;	carbohydrate							Terpenoids							Alkaloids		Vc28a298.50	normal	up	down	GO:0006633;GO:0009922;GO:0016020;	Lipids
Vc8a237.20	normal	down	up	GO:0003677;GO:0005634;GO:0006355;GO:0007389;GO:0009734;GO:0009738;GO:0009743;GO:0010154;GO:0016787;GO:0031540;GO:0048366;GO:0048441;GO:0048442;GO:0048589;GO:0048829;GO:0051301;	Flavonoids		Vc3s79.31	down	normal	down	GO:0005507;GO:0016020;GO:0046274;GO:0048046;GO:0052716;	Phenylpropanoids		Vc23p17.1	no	no	yes	normal	normal	up	GO:0004568;GO:0005975;GO:0006032;GO:0006952;GO:0008061;GO:0016998;	carbohydrate							Terpenoids							Alkaloids		Vc28a305.40	normal	up	down	GO:0006633;GO:0009922;GO:0016020;	Lipids
Vc8a79.42	normal	up	normal	GO:0004497;GO:0005506;GO:0005783;GO:0009698;GO:0009813;GO:0016020;GO:0016114;GO:0016705;GO:0018130;GO:0019438;GO:0020037;GO:0042802;GO:0044550;GO:1901362;	Flavonoids		Vc3s80.25	normal	up	normal	GO:0005507;GO:0016020;GO:0046274;GO:0048046;GO:0052716;	Phenylpropanoids		Vc23p27.5	no	yes	yes	normal	up	down	GO:0000325;GO:0005524;GO:0006811;GO:0006817;GO:0008643;GO:0016020;GO:0022857;GO:0050896;GO:0055085;	carbohydrate							Terpenoids							Alkaloids		Vc28a314.41	normal	up	down	GO:0004435;GO:0016042;GO:0035556;	Lipids
Vc8p226.3	normal	down	up	GO:0008194;GO:0009507;GO:0009813;GO:0016020;GO:0016114;GO:0046148;GO:0046283;GO:0046527;	Flavonoids		Vc40p195.0	normal	down	up	GO:0008194;GO:0009636;GO:0009809;GO:0009813;GO:0016020;GO:0042178;GO:0046148;GO:0046283;GO:0046527;	Phenylpropanoids		Vc23p319.2	yes	no	no	up	normal	normal	GO:0004556;GO:0005509;GO:0005975;GO:0016020;GO:1901575;	carbohydrate							Terpenoids							Alkaloids		Vc28a82.25	down	normal	down	GO:0004630;GO:0005737;GO:0006869;GO:0008289;GO:0012505;GO:0016020;GO:0043227;GO:0043228;GO:0043229;GO:0046872;GO:0070290;	Lipids
Vc9p318.12	normal	up	down	GO:0008194;GO:0009813;GO:0046527;	Flavonoids		Vc42a14.30	up	up	normal	GO:0005634;GO:0005783;GO:0006979;GO:0009611;GO:0009629;GO:0009699;GO:0009705;GO:0009714;GO:0009733;GO:0009753;GO:0009813;GO:0009926;GO:0010224;GO:0016747;GO:0016853;GO:0030639;GO:0031540;GO:0034081;GO:0042181;GO:0042803;GO:0120255;GO:1901696;	Phenylpropanoids		Vc23p52.20	no	no	yes	normal	normal	up	GO:0000272;GO:0004568;GO:0004672;GO:0005524;GO:0006032;GO:0016020;GO:0016310;GO:0016998;GO:0030246;GO:0071944;	carbohydrate							Terpenoids							Alkaloids		Vc28s293.31	normal	up	down	GO:0005773;GO:0016042;GO:0016298;GO:0016740;GO:0045735;	Lipids
Vc9p64.0	up	up	normal	GO:0005737;GO:0009058;GO:0009714;GO:0009812;GO:0016747;GO:0030638;GO:0042803;	Flavonoids		Vc42a154.36	up	up	normal	GO:0004497;GO:0005506;GO:0009699;GO:0016020;GO:0016705;GO:0020037;GO:0051762;	Phenylpropanoids		Vc23s259.30	yes	no	yes	up	normal	up	GO:0004133;GO:0005975;GO:0006112;GO:0009501;GO:0009569;GO:0009660;GO:0016020;GO:0016740;GO:0019156;GO:0043169;GO:0043170;GO:0044249;GO:1901575;GO:1901576;	carbohydrate							Terpenoids							Alkaloids		Vc28s319.35	normal	down	up	GO:0004322;GO:0005737;GO:0006826;GO:0006879;GO:0006979;GO:0008198;GO:0008199;GO:0009725;GO:0009908;GO:0010039;GO:0015979;GO:0033993;GO:0043231;GO:0048366;GO:0051238;GO:0051651;GO:1901700;	Lipids
Vc9s266.31	up	up	normal	GO:0000166;GO:0003878;GO:0005829;GO:0006099;GO:0006633;GO:0009911;GO:0010025;GO:0015995;GO:0016109;GO:0016116;GO:0016829;GO:0019252;GO:0043481;GO:0045793;GO:0045995;GO:0048366;GO:0140615;	Flavonoids		Vc42a16.34	normal	normal	down	GO:0003987;GO:0005524;GO:0005737;GO:0009698;GO:0016020;GO:0016207;GO:0016208;GO:0019427;GO:0043231;GO:0106290;	Phenylpropanoids		Vc23s282.35	no	no	yes	normal	normal	down	GO:0005576;GO:0005975;GO:0016829;GO:0030246;GO:1901575;	carbohydrate							Terpenoids							Alkaloids		Vc29a125.29	normal	up	down	GO:0004315;GO:0006633;	Lipids
							Vc42p262.6	normal	up	down	GO:0008171;GO:0008757;GO:0009809;GO:0032259;GO:0102822;	Phenylpropanoids		Vc23s287.27	no	yes	yes	normal	up	down	GO:0005351;GO:0005773;GO:0005801;GO:0005886;GO:0005985;GO:0006817;GO:0008515;GO:0015770;GO:0050896;GO:0055085;	carbohydrate							Terpenoids							Alkaloids		Vc29a127.28	normal	up	down	GO:0004435;GO:0005886;GO:0016042;GO:0035556;GO:0051209;	Lipids
							Vc43a132.29	normal	up	down	GO:0005524;GO:0005737;GO:0009698;GO:0016020;GO:0016207;GO:0016491;	Phenylpropanoids		Vc23s362.49	no	yes	yes	normal	up	down	GO:0005975;GO:0042973;	carbohydrate							Terpenoids							Alkaloids		Vc29a151.24	up	up	normal	GO:0005789;GO:0006629;GO:0016229;GO:0016627;GO:0072330;	Lipids
							Vc43a132.31	normal	up	down	GO:0004321;GO:0005524;GO:0005737;GO:0009611;GO:0009617;GO:0009695;GO:0009698;GO:0009851;GO:0016020;GO:0016405;GO:0016878;GO:0031408;GO:0043231;	Phenylpropanoids		Vc23s85.40	no	yes	yes	normal	down	up	GO:0005464;GO:0005794;GO:0008643;GO:0015297;GO:0015790;GO:0016020;	carbohydrate							Terpenoids							Alkaloids		Vc29a228.27	normal	down	up	GO:0005576;GO:0006629;GO:0016020;GO:0016788;GO:1901575;	Lipids
							Vc43a37.30	up	normal	up	GO:0002238;GO:0009805;GO:0016705;GO:0046872;GO:0051213;	Phenylpropanoids		Vc24a104.19	no	no	yes	normal	normal	down	GO:0005773;GO:0005975;GO:0006516;GO:0015928;GO:0016020;GO:0016139;GO:0044281;GO:0048046;GO:0099503;	carbohydrate							Terpenoids							Alkaloids		Vc29a263.27	normal	up	normal	GO:0003989;GO:0004075;GO:0005524;GO:0006633;GO:0009507;GO:0016020;GO:0046872;GO:2001295;	Lipids
							Vc43a75.21	normal	down	up	GO:0004497;GO:0005506;GO:0009808;GO:0016020;GO:0016114;GO:0016705;GO:0020037;GO:0051762;	Phenylpropanoids		Vc24a3.27	no	yes	yes	normal	down	up	GO:0005975;GO:0016787;GO:0047268;GO:0047274;	carbohydrate							Terpenoids							Alkaloids		Vc29a5.21	normal	down	up	GO:0006629;GO:0006796;GO:0009536;GO:0016020;GO:0016746;GO:0044249;GO:0090407;GO:1901566;	Lipids
							Vc43a98.22	normal	up	down	GO:0005576;GO:0005829;GO:0005975;GO:0008422;GO:0009057;GO:0102483;	Phenylpropanoids		Vc24a60.33	no	no	yes	normal	normal	down	GO:0005464;GO:0005794;GO:0008643;GO:0015297;GO:0015790;GO:0016020;	carbohydrate							Terpenoids							Alkaloids		Vc29a60.40	normal	down	normal	GO:0003723;GO:0005737;GO:0005847;GO:0006378;GO:0006398;GO:0016020;GO:0016042;GO:0035194;GO:0042500;	Lipids
							Vc43p36.14	up	up	normal	GO:0002238;GO:0009805;GO:0016705;GO:0031418;GO:0046872;GO:0051213;	Phenylpropanoids		Vc24a72.33	yes	yes	no	up	up	normal	GO:0005576;GO:0005975;GO:0008422;GO:0016020;GO:0102483;	carbohydrate							Terpenoids							Alkaloids		Vc29a66.49	normal	normal	up	GO:0000981;GO:0003677;GO:0005634;GO:0006357;GO:0008289;	Lipids
							Vc44a180.34	normal	up	down	GO:0002238;GO:0009805;GO:0016491;GO:0031418;GO:0046872;	Phenylpropanoids		Vc24p18.4	no	yes	yes	normal	down	up	GO:0004560;GO:0005975;GO:0016020;GO:0048046;	carbohydrate							Terpenoids							Alkaloids		Vc29p38.7	normal	down	up	GO:0006629;GO:0016020;GO:0016787;	Lipids
							Vc44a237.18	up	up	normal	GO:0003987;GO:0005524;GO:0005737;GO:0009698;GO:0016020;GO:0016207;	Phenylpropanoids		Vc24s121.39	no	yes	yes	normal	up	down	GO:0004553;GO:0005975;GO:0006952;GO:0016020;	carbohydrate							Terpenoids							Alkaloids		Vc29p96.2	normal	down	up	GO:0005576;GO:0009791;GO:0012511;GO:0016020;GO:0019915;GO:0019953;GO:0048608;	Lipids
							Vc44a238.23	normal	up	normal	GO:0002238;GO:0009805;GO:0016020;GO:0016491;GO:0031418;GO:0046872;	Phenylpropanoids		Vc24s177.16	no	yes	yes	normal	up	down	GO:0030246;GO:0046872;	carbohydrate							Terpenoids							Alkaloids		Vc29s172.30	normal	up	down	GO:0005783;GO:0008146;GO:0008289;GO:0016020;	Lipids
							Vc44a92.19	normal	normal	down	GO:0002238;GO:0009416;GO:0009686;GO:0009805;GO:0016705;GO:0031418;GO:0046872;GO:0051213;	Phenylpropanoids		Vc24s205.89	yes	yes	no	up	up	normal	GO:0004674;GO:0005524;GO:0016020;GO:0016310;GO:0030246;GO:0031625;GO:0048544;GO:0051707;GO:0071944;GO:0106310;	carbohydrate							Terpenoids							Alkaloids		Vc2a222.24	normal	up	down	GO:0006629;GO:0009820;GO:0016787;	Lipids
							Vc45a82.25	normal	normal	down	GO:0005576;GO:0008422;GO:0009044;GO:0016020;GO:0031222;GO:0045493;GO:0046556;GO:0102483;	Phenylpropanoids		Vc24s209.34	no	yes	no	normal	up	normal	GO:0004674;GO:0004713;GO:0005516;GO:0005524;GO:0005634;GO:0006952;GO:0006955;GO:0016020;GO:0016310;GO:0030246;GO:0031625;GO:0048544;GO:0051707;GO:0071944;GO:0106310;	carbohydrate							Terpenoids							Alkaloids		Vc2a248.22	up	up	normal	GO:0006633;GO:0009813;GO:0009922;GO:0016020;	Lipids
							Vc45s216.26	up	up	down	GO:0008171;GO:0008757;GO:0009809;GO:0032259;GO:0046872;	Phenylpropanoids		Vc24s214.30	no	yes	yes	normal	up	down	GO:0000325;GO:0003825;GO:0004805;GO:0005576;GO:0006817;GO:0008519;GO:0009506;GO:0015145;GO:0015293;GO:0015749;GO:0016020;GO:0032440;GO:0050896;GO:0071944;GO:0072488;	carbohydrate							Terpenoids							Alkaloids		Vc2a302.39	up	down	up	GO:0005783;GO:0006633;GO:0009409;GO:0009416;GO:0009922;GO:0010025;GO:0016020;GO:0016491;GO:0016829;GO:0048868;GO:0090378;	Lipids
							Vc46a11.23	up	up	normal	GO:0002238;GO:0007033;GO:0009611;GO:0009718;GO:0009753;GO:0009805;GO:0010023;GO:0016705;GO:0031418;GO:0046872;GO:0051213;	Phenylpropanoids		Vc24s73.41	no	yes	yes	normal	up	down	GO:0005509;GO:0005576;GO:0005975;GO:0008422;GO:0009057;GO:0102483;	carbohydrate							Terpenoids							Alkaloids		Vc2a322.25	up	normal	up	GO:0006633;GO:0009922;GO:0016020;	Lipids
							Vc46a145.24	up	down	up	GO:0004497;GO:0005506;GO:0006721;GO:0008299;GO:0009808;GO:0016020;GO:0016705;GO:0020037;GO:0051761;GO:0120251;	Phenylpropanoids		Vc25a117.24	yes	no	yes	up	normal	up	GO:0005975;GO:0015925;	carbohydrate							Terpenoids							Alkaloids		Vc2a341.19	normal	down	normal	GO:0004190;GO:0006508;GO:0006629;GO:0016020;	Lipids
							Vc46a171.29	up	up	normal	GO:0002238;GO:0009805;GO:0016705;GO:0046872;GO:0051213;	Phenylpropanoids		Vc25a163.31	yes	yes	no	up	up	normal	GO:0004568;GO:0005773;GO:0005975;GO:0006032;GO:0006952;GO:0008061;GO:0016020;GO:0016998;	carbohydrate							Terpenoids							Alkaloids		Vc2a351.33	normal	up	down	GO:0008289;GO:0016020;GO:0016616;GO:0016621;	Lipids
							Vc46a172.36	up	up	normal	GO:0002238;GO:0009805;GO:0016491;GO:0031418;GO:0046872;	Phenylpropanoids		Vc25a163.32	yes	yes	no	up	up	normal	GO:0004568;GO:0005773;GO:0005975;GO:0006032;GO:0006952;GO:0008061;GO:0016998;	carbohydrate							Terpenoids							Alkaloids		Vc2a426.23	normal	down	up	GO:0006633;GO:0009922;GO:0016020;	Lipids
							Vc46a86.22	normal	up	down	GO:0004321;GO:0005524;GO:0005737;GO:0009611;GO:0009617;GO:0009695;GO:0009698;GO:0009851;GO:0016020;GO:0016405;GO:0016878;GO:0031408;GO:0043231;	Phenylpropanoids		Vc25a163.34	yes	yes	no	up	up	normal	GO:0004568;GO:0005773;GO:0005975;GO:0006032;GO:0006952;GO:0008061;GO:0016020;GO:0016998;	carbohydrate							Terpenoids							Alkaloids		Vc2p437.14	normal	up	down	GO:0004436;GO:0004620;GO:0006629;GO:0008081;	Lipids
							Vc46a86.25	normal	up	down	GO:0005524;GO:0005737;GO:0009698;GO:0016020;GO:0016207;GO:0016491;	Phenylpropanoids		Vc25a163.35	yes	yes	no	up	up	normal	GO:0004568;GO:0005773;GO:0005975;GO:0006032;GO:0006952;GO:0008061;GO:0016998;	carbohydrate							Terpenoids							Alkaloids		Vc2s374.41	up	up	normal	GO:0005886;GO:0006869;GO:0008289;GO:0098552;	Lipids
							Vc47a123.34	normal	down	up	GO:0004497;GO:0005506;GO:0006721;GO:0008299;GO:0009808;GO:0016020;GO:0016705;GO:0020037;GO:0051761;GO:0120251;	Phenylpropanoids		Vc25a176.18	no	yes	no	normal	up	normal	GO:0004674;GO:0005524;GO:0005886;GO:0016310;GO:0030246;GO:0050832;	carbohydrate							Terpenoids							Alkaloids		Vc2s58.20	up	normal	up	GO:0000981;GO:0003677;GO:0005634;GO:0006357;GO:0008289;	Lipids
							Vc47a163.33	normal	normal	up	GO:0002238;GO:0009805;GO:0016705;GO:0046872;GO:0051213;	Phenylpropanoids		Vc25a199.22	no	yes	yes	normal	down	up	GO:0005789;GO:0005886;GO:0034219;GO:0051119;GO:0051260;	carbohydrate							Terpenoids							Alkaloids		Vc30a113.21	normal	up	down	GO:0004310;GO:0005789;GO:0008610;GO:0045338;GO:0051996;	Lipids
							Vc47a69.25	normal	up	down	GO:0004321;GO:0005524;GO:0005737;GO:0009611;GO:0009617;GO:0009695;GO:0009698;GO:0009851;GO:0016020;GO:0016405;GO:0016878;GO:0031408;GO:0043231;	Phenylpropanoids		Vc25a219.17	no	no	yes	normal	normal	down	GO:0005457;GO:0005459;GO:0005460;GO:0005794;GO:0008643;GO:0015297;GO:0015783;GO:0015786;GO:0016020;GO:0051301;GO:0072334;	carbohydrate							Terpenoids							Alkaloids		Vc30a166.17	normal	up	down	GO:0006071;GO:0006629;GO:0008889;GO:0016020;	Lipids
							Vc47a69.26	normal	up	down	GO:0005524;GO:0005737;GO:0009698;GO:0016020;GO:0016207;GO:0016491;	Phenylpropanoids		Vc25a307.30	no	yes	yes	normal	up	down	GO:0003676;GO:0004674;GO:0005516;GO:0005524;GO:0008270;GO:0009506;GO:0016020;GO:0016310;GO:0030246;GO:0031625;GO:0048544;GO:0051707;GO:0071944;GO:0106310;	carbohydrate							Terpenoids							Alkaloids		Vc30a207.36	normal	up	normal	GO:0004140;GO:0004595;GO:0006629;GO:0009651;GO:0015937;GO:0019915;GO:0080020;	Lipids
							Vc47p162.16	normal	up	normal	GO:0002238;GO:0009805;GO:0016706;GO:0031418;GO:0046872;	Phenylpropanoids		Vc25a310.42	no	yes	yes	normal	up	down	GO:0003676;GO:0004674;GO:0005516;GO:0005524;GO:0008270;GO:0009506;GO:0016020;GO:0016310;GO:0030246;GO:0031625;GO:0048544;GO:0051707;GO:0071944;GO:0106310;	carbohydrate							Terpenoids							Alkaloids		Vc30a258.32	normal	up	down	GO:0005829;GO:0006869;GO:0008289;GO:0015248;GO:0015850;GO:0016020;GO:0043231;GO:0097159;	Lipids
							Vc47p59.3	up	up	down	GO:0004664;GO:0006558;GO:0009095;GO:0009570;GO:0016020;GO:0047769;GO:1902223;	Phenylpropanoids		Vc25a317.25	yes	no	yes	down	normal	down	GO:0004252;GO:0005355;GO:0005459;GO:0005794;GO:0006508;GO:0008643;GO:0015297;GO:0016020;GO:0071944;GO:0072334;	carbohydrate							Terpenoids							Alkaloids		Vc30a274.36	up	normal	up	GO:0000038;GO:0005634;GO:0005789;GO:0005829;GO:0006633;GO:0016740;GO:0030148;GO:0030154;GO:0048640;GO:0050732;GO:0051302;GO:0098796;GO:0102158;GO:0140534;GO:1990234;	Lipids
							Vc48a105.37	up	up	normal	GO:0008171;GO:0008757;GO:0009809;GO:0009813;GO:0032259;GO:0046983;GO:0102084;GO:0102938;	Phenylpropanoids		Vc25a6.29	no	no	yes	normal	normal	down	GO:0004553;GO:0005773;GO:0005975;GO:0016020;GO:0030246;	carbohydrate							Terpenoids							Alkaloids		Vc30a278.30	normal	down	up	GO:0009820;GO:0016042;GO:0016787;	Lipids
							Vc4a5.29	normal	normal	down	GO:0005524;GO:0005777;GO:0005829;GO:0006083;GO:0006097;GO:0009698;GO:0016874;GO:0019605;GO:0140657;	Phenylpropanoids		Vc25a61.24	no	yes	yes	normal	up	down	GO:0000138;GO:0005515;GO:0005768;GO:0005802;GO:0005975;GO:0016020;GO:0033481;GO:0050378;GO:0050829;GO:0050832;GO:1901566;	carbohydrate							Terpenoids							Alkaloids		Vc30a343.51	normal	down	up	GO:0004190;GO:0006508;GO:0006629;GO:0016020;	Lipids
							Vc4p398.7	normal	up	down	GO:0016616;GO:0016621;	Phenylpropanoids		Vc25p330.6	no	yes	yes	normal	up	down	GO:0000272;GO:0000325;GO:0000427;GO:0003677;GO:0003723;GO:0005515;GO:0005777;GO:0005829;GO:0005840;GO:0005996;GO:0006364;GO:0007623;GO:0009409;GO:0009506;GO:0009611;GO:0009658;GO:0009941;GO:0010287;GO:0010297;GO:0010319;GO:0032544;GO:0042631;GO:0045727;GO:0045893;GO:0048046;	carbohydrate							Terpenoids							Alkaloids		Vc30p185.0	normal	down	up	GO:0009791;GO:0012511;GO:0016020;GO:0048608;	Lipids
							Vc4p419.17	up	up	normal	GO:0008152;GO:0008422;GO:0016020;GO:0016719;GO:0016788;GO:0052886;GO:0052887;GO:0102483;	Phenylpropanoids		Vc25s266.39	no	no	yes	normal	normal	up	GO:0005524;GO:0005975;GO:0009507;GO:0016020;GO:0016301;GO:0016310;GO:0046872;GO:0102216;	carbohydrate							Terpenoids							Alkaloids		Vc30p343.16	normal	down	up	GO:0009791;GO:0012511;GO:0016020;GO:0048608;	Lipids
							Vc4s31.77	normal	normal	down	GO:0005524;GO:0005777;GO:0005829;GO:0006083;GO:0006097;GO:0009698;GO:0016874;GO:0019605;GO:0140657;	Phenylpropanoids		Vc25s270.32	no	no	yes	normal	normal	down	GO:0004650;GO:0005975;GO:0016020;GO:0016829;GO:0047911;	carbohydrate							Terpenoids							Alkaloids		Vc30s115.57	normal	up	normal	GO:0008610;GO:0008757;GO:0032259;	Lipids
							Vc4s342.27	normal	up	down	GO:0005737;GO:0009698;GO:0016020;GO:0016207;GO:0106290;	Phenylpropanoids		Vc25s28.29	no	no	yes	normal	normal	down	GO:0004553;GO:0005975;GO:0009057;GO:0016020;GO:0030246;	carbohydrate							Terpenoids							Alkaloids		Vc30s293.49	normal	down	up	GO:0004630;GO:0005509;GO:0016020;GO:0016042;GO:0044248;GO:0046434;GO:0046470;GO:0070290;GO:0071944;	Lipids
							Vc50p21.6	up	up	normal	GO:0005524;GO:0008270;GO:0009611;GO:0009698;GO:0009753;GO:0016020;GO:0016207;GO:0016491;GO:0016740;GO:0050563;GO:0106286;GO:0106290;	Phenylpropanoids		Vc25s285.29	no	yes	yes	normal	down	up	GO:0000427;GO:0005515;GO:0005975;GO:0006355;GO:0009658;GO:0009662;GO:0016020;GO:0016301;GO:0016310;GO:0016773;GO:0042644;GO:0042793;	carbohydrate							Terpenoids							Alkaloids		Vc30s319.26	normal	up	normal	GO:0006629;GO:0016020;GO:0016229;GO:0016627;GO:0016853;	Lipids
							Vc51a3.22	normal	down	up	GO:0005737;GO:0009698;GO:0016207;	Phenylpropanoids		Vc25s327.52	no	no	yes	normal	normal	down	GO:0005509;GO:0005788;GO:0005789;GO:0006457;GO:0030246;GO:0030433;GO:0051082;	carbohydrate							Terpenoids							Alkaloids		Vc31a341.58	normal	up	normal	GO:0005773;GO:0016042;GO:0016298;GO:0016853;GO:0045735;GO:0052689;	Lipids
							Vc552s0.9	down	up	down	GO:0005737;GO:0008194;GO:0009636;GO:0009801;GO:0009813;GO:0033494;GO:0046148;GO:0046278;GO:0046283;GO:0046527;	Phenylpropanoids		Vc26a1.31	no	yes	yes	normal	up	down	GO:0001678;GO:0004396;GO:0005524;GO:0005536;GO:0005739;GO:0005829;GO:0006096;GO:0009507;GO:0016020;GO:0019318;GO:0046835;GO:0051156;	carbohydrate							Terpenoids							Alkaloids		Vc31a93.28	up	up	normal	GO:0005773;GO:0006952;GO:0016020;GO:0016042;GO:0016298;GO:0016740;GO:0045735;GO:0052689;	Lipids
							Vc578s0.21	normal	up	down	GO:0005737;GO:0008270;GO:0009809;GO:0016616;	Phenylpropanoids		Vc26a18.34	no	yes	yes	normal	up	down	GO:0006817;GO:0008643;GO:0016020;GO:0022857;GO:0032440;GO:0032981;GO:0050896;GO:0055085;	carbohydrate							Terpenoids							Alkaloids		Vc31s326.42	normal	up	down	GO:0003887;GO:0005737;GO:0006869;GO:0006979;GO:0008289;GO:0012505;GO:0016020;GO:0016688;GO:0020037;GO:0043227;GO:0043229;GO:0046872;GO:0071897;GO:0098869;	Lipids
							Vc5a235.33	up	up	normal	GO:0005737;GO:0006558;GO:0009074;GO:0009800;GO:0032991;GO:0045548;GO:1902222;	Phenylpropanoids		Vc26a309.28	no	yes	yes	normal	up	down	GO:0005459;GO:0005460;GO:0005794;GO:0008168;GO:0008643;GO:0015297;GO:0015786;GO:0016020;GO:0032259;GO:0048527;GO:0072334;GO:0080147;	carbohydrate							Terpenoids							Alkaloids		Vc32a282.37	up	normal	up	GO:0004721;GO:0005829;GO:0006629;GO:0016311;GO:0019637;GO:0052866;	Lipids
							Vc5a375.24	down	normal	normal	GO:0002238;GO:0004674;GO:0009805;GO:0016705;GO:0031418;GO:0046872;GO:0051213;	Phenylpropanoids		Vc26a31.27	yes	no	no	up	normal	normal	GO:0002229;GO:0005777;GO:0005829;GO:0005975;GO:0006098;GO:0009507;GO:0016853;GO:0017057;GO:0042128;GO:0042742;GO:0071461;	carbohydrate							Terpenoids							Alkaloids		Vc32a308.29	up	up	normal	GO:0002213;GO:0009055;GO:0016020;GO:0016042;GO:0016788;GO:0016874;GO:0022900;	Lipids
							Vc5a375.25	up	up	normal	GO:0002238;GO:0009416;GO:0009805;GO:0031418;GO:0045487;GO:0046872;GO:0052634;	Phenylpropanoids		Vc26a347.28	no	no	yes	normal	normal	down	GO:0004650;GO:0005975;GO:0033917;GO:0047911;	carbohydrate							Terpenoids							Alkaloids		Vc32a98.23	normal	up	down	GO:0002238;GO:0004310;GO:0005783;GO:0006722;GO:0008610;GO:0009723;GO:0009751;GO:0009753;GO:0016125;GO:0016135;GO:0031090;GO:0031984;GO:0042175;GO:0042542;GO:0044249;GO:0045338;GO:0046872;GO:0051996;GO:0071731;GO:1901362;GO:1901617;GO:1902438;	Lipids
							Vc5p287.0	normal	up	down	GO:0080037;GO:2000762;	Phenylpropanoids		Vc26s109.44	no	no	yes	normal	normal	down	GO:0005975;GO:0015925;GO:0016020;	carbohydrate							Terpenoids							Alkaloids		Vc32p155.2	normal	up	down	GO:0006071;GO:0006629;GO:0008889;GO:0016020;	Lipids
							Vc5s236.31	up	up	normal	GO:0005737;GO:0006558;GO:0009074;GO:0009800;GO:0016597;GO:0032991;GO:0045548;GO:1902222;	Phenylpropanoids		Vc26s82.33	no	yes	yes	normal	up	down	GO:0000325;GO:0004564;GO:0005576;GO:0005775;GO:0005975;GO:0009414;GO:0009617;GO:0009651;GO:0009737;GO:0009755;GO:0016020;GO:0030246;GO:0071370;GO:0097306;	carbohydrate							Terpenoids							Alkaloids		Vc32p166.4	normal	down	up	GO:0009791;GO:0012511;GO:0016020;GO:0048608;	Lipids
							Vc5s236.34	up	up	normal	GO:0005737;GO:0006558;GO:0009074;GO:0009800;GO:0032991;GO:0045548;GO:1902222;	Phenylpropanoids		Vc27a132.27	no	yes	yes	normal	up	down	GO:0004427;GO:0005509;GO:0005783;GO:0006457;GO:0009678;GO:0016020;GO:0016491;GO:0030246;GO:0051082;GO:1902600;	carbohydrate							Terpenoids							Alkaloids		Vc32p301.2	normal	down	up	GO:0009791;GO:0012511;GO:0016020;GO:0048608;	Lipids
							Vc5s79.28	normal	up	down	GO:0002238;GO:0009805;GO:0016491;GO:0031418;GO:0046872;	Phenylpropanoids		Vc27a205.16	no	yes	yes	normal	up	down	GO:0005975;GO:0008422;GO:0009507;GO:0102726;	carbohydrate							Terpenoids							Alkaloids		Vc32p328.3	normal	down	up	GO:0004630;GO:0005509;GO:0016020;GO:0016042;GO:0046470;GO:0070290;	Lipids
							Vc6a364.11	normal	down	up	GO:0005886;GO:0006720;GO:0008270;GO:0009617;GO:0009809;GO:0010597;GO:0016616;	Phenylpropanoids		Vc27a286.23	no	yes	no	normal	up	normal	GO:0004601;GO:0005509;GO:0007231;GO:0009408;GO:0009611;GO:0016020;GO:0033500;GO:0043069;GO:0050664;GO:0050832;GO:0071944;GO:0072593;GO:0098869;	carbohydrate							Terpenoids							Alkaloids		Vc32s300.33	normal	down	normal	GO:0004190;GO:0006508;GO:0006629;GO:0016020;	Lipids
							Vc6a422.25	up	up	normal	GO:0005524;GO:0005737;GO:0007623;GO:0009698;GO:0010597;GO:0016207;GO:0016491;GO:0018858;GO:0019438;GO:0033494;GO:0042537;GO:0050563;GO:0052315;GO:0072330;GO:0106286;GO:0106290;GO:0120255;GO:1901362;	Phenylpropanoids		Vc27a300.32	no	yes	yes	normal	up	down	GO:0002237;GO:0004370;GO:0005524;GO:0005739;GO:0005829;GO:0006071;GO:0006072;GO:0006641;GO:0010188;GO:0016310;GO:0019405;GO:0042742;GO:0090407;GO:1901137;	carbohydrate							Terpenoids							Alkaloids		Vc33a170.17	normal	up	down	GO:0005783;GO:0008146;GO:0008289;GO:0016020;	Lipids
							Vc6s313.31	normal	up	down	GO:0003755;GO:0004801;GO:0005737;GO:0005975;GO:0006098;GO:0009749;GO:0009809;GO:0043231;	Phenylpropanoids		Vc27a306.43	no	no	yes	normal	normal	down	GO:0004650;GO:0005515;GO:0005576;GO:0005975;GO:0016020;GO:0016829;GO:0047911;GO:0071555;	carbohydrate							Terpenoids							Alkaloids		Vc33a186.25	up	up	normal	GO:0005789;GO:0006629;GO:0016229;GO:0016627;GO:0072330;	Lipids
							Vc740a0.8	normal	up	down	GO:0001676;GO:0004467;GO:0005783;GO:0009698;GO:0016020;GO:0016207;GO:0106290;	Phenylpropanoids		Vc27a343.23	no	no	yes	normal	normal	down	GO:0004565;GO:0005773;GO:0005975;GO:0016020;GO:0030246;	carbohydrate							Terpenoids							Alkaloids		Vc33a210.28	normal	up	down	GO:0004435;GO:0005886;GO:0016042;GO:0035556;GO:0051209;	Lipids
							Vc7a307.20	normal	down	up	GO:0008171;GO:0008757;GO:0009809;GO:0009820;GO:0032259;	Phenylpropanoids		Vc27a362.29	yes	no	yes	up	normal	up	GO:0005794;GO:0015114;GO:0015120;GO:0015297;GO:0015355;GO:0015605;GO:0015713;GO:0015748;GO:0031969;GO:1901264;GO:1901505;	carbohydrate							Terpenoids							Alkaloids		Vc33a271.34	up	normal	up	GO:0000981;GO:0003677;GO:0005634;GO:0006357;GO:0008289;	Lipids
							Vc7a416.33	up	up	normal	GO:0016020;GO:0016592;GO:0016787;GO:2000762;	Phenylpropanoids		Vc27p132.5	no	no	yes	normal	normal	down	GO:0003924;GO:0005509;GO:0005525;GO:0005788;GO:0005789;GO:0006457;GO:0030246;GO:0030433;GO:0051082;	carbohydrate							Terpenoids							Alkaloids		Vc33a310.30	normal	down	up	GO:0006629;GO:0006796;GO:0016020;GO:0016746;GO:0044249;GO:0090407;GO:1901566;	Lipids
							Vc7a89.32	normal	up	normal	GO:0005576;GO:0008422;GO:0009044;GO:0031222;GO:0045493;GO:0046556;GO:0102483;	Phenylpropanoids		Vc27s105.30	no	yes	yes	normal	up	down	GO:0003735;GO:0004348;GO:0005840;GO:0005975;GO:0006412;GO:0006680;GO:0008422;GO:0016020;GO:1990904;	carbohydrate							Terpenoids							Alkaloids		Vc33p115.0	normal	down	up	GO:0006629;GO:0016719;GO:0016788;GO:0052886;GO:0052887;	Lipids
							Vc7p48.23	normal	up	down	GO:0002238;GO:0004386;GO:0009805;GO:0009813;GO:0016491;GO:0031418;GO:0043473;GO:0046872;	Phenylpropanoids		Vc27s351.27	no	yes	yes	normal	up	down	GO:0004556;GO:0005509;GO:0005975;GO:0016020;GO:0043170;GO:1901575;	carbohydrate							Terpenoids							Alkaloids		Vc33p241.8	normal	down	up	GO:0005576;GO:0009791;GO:0012511;GO:0016020;GO:0019915;GO:0019953;GO:0048608;	Lipids
							Vc8a235.20	up	up	normal	GO:0005737;GO:0006558;GO:0009074;GO:0009800;GO:0032991;GO:0045548;GO:1902222;	Phenylpropanoids		Vc28a24.25	yes	no	yes	up	normal	up	GO:0005576;GO:0008810;GO:0016020;GO:0030245;GO:0030246;GO:0071555;	carbohydrate							Terpenoids							Alkaloids		Vc34a0.21	normal	normal	down	GO:0006629;GO:0016020;GO:0016298;GO:0033879;GO:0106435;	Lipids
							Vc8a235.22	up	up	normal	GO:0005737;GO:0006558;GO:0009074;GO:0009800;GO:0032991;GO:0045548;GO:1902222;	Phenylpropanoids		Vc28a25.27	yes	yes	no	up	up	normal	GO:0004650;GO:0004864;GO:0005737;GO:0005886;GO:0005975;GO:0009738;GO:0016829;GO:0047911;	carbohydrate							Terpenoids							Alkaloids		Vc34a256.30	normal	up	down	GO:0003735;GO:0005576;GO:0005840;GO:0006412;GO:0016020;GO:0017040;GO:0042759;GO:0046512;GO:0046514;GO:0102121;GO:1990904;	Lipids
							Vc8a236.15	up	up	normal	GO:0005737;GO:0006558;GO:0009074;GO:0009800;GO:0032991;GO:0045548;GO:1902222;	Phenylpropanoids		Vc28a257.25	no	no	yes	normal	normal	up	GO:0005829;GO:0005975;GO:0006098;GO:0016020;GO:0017057;	carbohydrate							Terpenoids							Alkaloids		Vc34a41.39	normal	up	down	GO:0004630;GO:0005509;GO:0005773;GO:0005783;GO:0009536;GO:0016020;GO:0016042;GO:0016779;GO:0044248;GO:0046434;GO:0046470;GO:0070290;GO:0071944;	Lipids
							Vc8a52.29	up	up	normal	GO:0002238;GO:0009416;GO:0009805;GO:0031418;GO:0045487;GO:0046872;GO:0052634;	Phenylpropanoids		Vc28a268.31	no	no	yes	normal	normal	down	GO:0005975;GO:0016853;GO:0097367;GO:1901135;	carbohydrate							Terpenoids							Alkaloids		Vc34a42.49	normal	down	up	GO:0000038;GO:0000160;GO:0005789;GO:0006633;GO:0009579;GO:0009644;GO:0009979;GO:0016717;GO:0031408;GO:0031969;GO:0033559;GO:0043155;	Lipids
							Vc8a79.42	normal	up	normal	GO:0004497;GO:0005506;GO:0005783;GO:0009698;GO:0009813;GO:0016020;GO:0016114;GO:0016705;GO:0018130;GO:0019438;GO:0020037;GO:0042802;GO:0044550;GO:1901362;	Phenylpropanoids		Vc28a32.43	yes	yes	no	up	up	normal	GO:0004674;GO:0005524;GO:0016020;GO:0016310;GO:0030246;GO:0048544;GO:0051707;GO:0106310;	carbohydrate							Terpenoids							Alkaloids		Vc34a71.32	normal	down	up	GO:0004303;GO:0004316;GO:0005811;GO:0005829;GO:0008202;GO:0008610;GO:0009507;GO:0016020;GO:0070523;GO:0070524;GO:0072582;GO:0102196;GO:1901362;	Lipids
							Vc8p143.25	normal	up	down	GO:0080037;GO:2000762;	Phenylpropanoids		Vc28p330.2	no	yes	yes	normal	up	down	GO:0004553;GO:0005507;GO:0005975;GO:0016491;	carbohydrate							Terpenoids							Alkaloids		Vc34s112.26	up	up	normal	GO:0005634;GO:0006629;GO:0006952;GO:0016787;	Lipids
							Vc8s149.28	up	up	normal	GO:0006720;GO:0016020;GO:0016616;GO:0016621;	Phenylpropanoids		Vc28s1.30	yes	yes	no	up	up	normal	GO:0003677;GO:0005634;GO:0005975;GO:0006952;GO:0016020;GO:0016798;GO:0051537;	carbohydrate							Terpenoids							Alkaloids		Vc34s112.27	up	up	normal	GO:0005634;GO:0006629;GO:0006952;GO:0016020;GO:0106435;	Lipids
							Vc8s303.26	normal	up	down	GO:0002238;GO:0009805;GO:0016491;GO:0031418;GO:0046872;	Phenylpropanoids		Vc28s31.31	no	yes	yes	normal	down	up	GO:0000139;GO:0005975;GO:0006486;GO:0016758;GO:0030246;GO:0047938;	carbohydrate							Terpenoids							Alkaloids		Vc34s136.41	normal	normal	down	GO:0002238;GO:0005783;GO:0005794;GO:0016020;GO:0042759;GO:0046513;GO:0050291;	Lipids
							Vc9a397.25	up	up	normal	GO:0008152;GO:0008422;GO:0016020;GO:0016719;GO:0016788;GO:0052886;GO:0052887;GO:0102483;	Phenylpropanoids		Vc28s344.47	no	no	yes	normal	normal	up	GO:0002229;GO:0005777;GO:0005829;GO:0005975;GO:0006098;GO:0009507;GO:0016740;GO:0016853;GO:0017057;GO:0042128;GO:0042742;GO:0071461;	carbohydrate							Terpenoids							Alkaloids		Vc34s284.47	normal	up	down	GO:0004190;GO:0006629;	Lipids
							Vc9p377.29	normal	up	down	GO:0003854;GO:0006694;GO:0016621;	Phenylpropanoids		Vc29a17.49	yes	yes	yes	up	up	down	GO:0006817;GO:0008643;GO:0016020;GO:0022857;GO:0032440;GO:0032981;GO:0050896;GO:0055085;	carbohydrate							Terpenoids							Alkaloids		Vc34s4.26	normal	down	up	GO:0004806;GO:0006629;	Lipids
							Vc9s317.36	normal	up	down	GO:0003987;GO:0005737;GO:0009698;GO:0016020;GO:0016207;GO:0106290;	Phenylpropanoids		Vc29a221.37	no	yes	yes	normal	up	down	GO:0004553;GO:0005975;GO:0016597;GO:0016779;GO:0140096;	carbohydrate							Terpenoids							Alkaloids		Vc34s71.38	up	up	normal	GO:0005829;GO:0008202;GO:0008610;GO:0009507;GO:0016020;GO:0016491;GO:1901362;	Lipids
							Vc9s390.40	normal	up	down	GO:0080037;GO:2000762;	Phenylpropanoids		Vc29a297.28	no	yes	yes	normal	up	down	GO:0005459;GO:0005460;GO:0005794;GO:0008168;GO:0008643;GO:0015297;GO:0015786;GO:0016020;GO:0032259;GO:0048527;GO:0072334;GO:0080147;	carbohydrate							Terpenoids							Alkaloids		Vc35a260.37	normal	up	down	GO:0003989;GO:0006633;GO:0009317;GO:0009507;	Lipids
														Vc29a3.21	yes	yes	no	up	up	normal	GO:0004565;GO:0005773;GO:0005975;GO:0016020;GO:0030246;	carbohydrate							Terpenoids							Alkaloids		Vc35a266.25	up	up	normal	GO:0005319;GO:0005524;GO:0005737;GO:0006869;GO:0008028;GO:0012505;GO:0015718;GO:0016020;GO:0016887;GO:0031984;GO:0043231;GO:0048316;GO:0055085;GO:0140359;	Lipids
														Vc29a335.43	no	no	yes	normal	normal	down	GO:0004650;GO:0005975;GO:0033917;GO:0047911;	carbohydrate							Terpenoids							Alkaloids		Vc35a286.15	normal	up	normal	GO:0006633;GO:0009416;GO:0009507;GO:0016740;GO:0031177;GO:0044620;GO:0140414;	Lipids
														Vc29a52.37	yes	yes	no	up	up	normal	GO:0004650;GO:0005975;GO:0016020;GO:0016829;GO:0047911;	carbohydrate							Terpenoids							Alkaloids		Vc35a318.30	up	normal	normal	GO:0005737;GO:0006633;GO:0008299;GO:0009579;GO:0009694;GO:0016702;GO:0031408;GO:0034440;GO:0043231;GO:0046872;	Lipids
														Vc29a84.20	no	yes	yes	normal	up	down	GO:0000325;GO:0004564;GO:0005576;GO:0005775;GO:0005975;GO:0009414;GO:0009617;GO:0009651;GO:0009737;GO:0009755;GO:0016020;GO:0030246;GO:0071370;GO:0097306;	carbohydrate							Terpenoids							Alkaloids		Vc35a41.24	normal	normal	down	GO:0005737;GO:0006633;GO:0016020;GO:0016702;GO:0031408;GO:0034440;GO:0046872;	Lipids
														Vc29p22.9	no	yes	no	normal	up	normal	GO:0002239;GO:0004672;GO:0004888;GO:0005524;GO:0007178;GO:0009617;GO:0016020;GO:0016310;GO:0030246;GO:0071944;GO:0098542;	carbohydrate							Terpenoids							Alkaloids		Vc35a85.21	up	normal	up	GO:0000981;GO:0003677;GO:0005634;GO:0006357;GO:0008289;	Lipids
														Vc29s110.45	no	yes	yes	normal	up	down	GO:0005975;GO:0015925;GO:0016020;	carbohydrate							Terpenoids							Alkaloids		Vc35p240.0	up	up	normal	GO:0006869;	Lipids
														Vc29s145.17	no	yes	yes	normal	down	up	GO:0002229;GO:0004672;GO:0004888;GO:0005524;GO:0006886;GO:0007178;GO:0016020;GO:0016310;GO:0017119;GO:0030246;GO:0042742;GO:0071944;	carbohydrate							Terpenoids							Alkaloids		Vc35p269.2	normal	down	up	GO:0009791;GO:0012511;GO:0016020;GO:0019915;GO:0021700;GO:0034389;GO:0044085;GO:0048608;GO:0048609;GO:0050826;	Lipids
														Vc29s151.27	yes	no	no	up	normal	normal	GO:0004674;GO:0005524;GO:0016020;GO:0016310;GO:0030246;	carbohydrate							Terpenoids							Alkaloids		Vc35s201.18	up	up	normal	GO:0000166;GO:0003878;GO:0005829;GO:0006099;GO:0006633;GO:0009911;GO:0010025;GO:0015995;GO:0016109;GO:0016116;GO:0016829;GO:0019252;GO:0035639;GO:0043481;GO:0045793;GO:0045995;GO:0048366;GO:0097367;GO:0140615;	Lipids
														Vc29s274.37	no	no	yes	normal	normal	down	GO:0004553;GO:0005576;GO:0005975;	carbohydrate							Terpenoids							Alkaloids		Vc35s304.40	normal	up	down	GO:0000981;GO:0003677;GO:0005634;GO:0006357;GO:0008289;	Lipids
														Vc2a100.32	no	no	yes	normal	normal	up	GO:0003839;GO:0004553;GO:0005737;GO:0005975;GO:0006751;GO:0016020;GO:0016740;GO:0061928;	carbohydrate							Terpenoids							Alkaloids		Vc36a148.45	normal	normal	up	GO:0004791;GO:0005739;GO:0005975;GO:0006744;GO:0008289;GO:0009860;GO:0010183;GO:0016740;GO:0042973;GO:0046872;GO:0047134;GO:0080092;GO:0098869;	Lipids
														Vc2a101.19	yes	no	no	down	normal	normal	GO:0001708;GO:0004568;GO:0005794;GO:0005975;GO:0006032;GO:0006952;GO:0008061;GO:0009059;GO:0009408;GO:0009414;GO:0009651;GO:0009735;GO:0009825;GO:0009873;GO:0010053;GO:0010167;GO:0010337;GO:0016020;GO:0016998;GO:0030247;GO:0048046;	carbohydrate							Terpenoids							Alkaloids		Vc36a172.19	normal	up	down	GO:0005829;GO:0006869;GO:0008289;GO:0015248;GO:0015850;GO:0016020;GO:0043231;GO:0097159;	Lipids
														Vc2a104.24	no	yes	yes	normal	up	down	GO:0004674;GO:0005524;GO:0005886;GO:0016310;GO:0030246;GO:0050832;	carbohydrate							Terpenoids							Alkaloids		Vc36a268.28	normal	normal	down	GO:0005737;GO:0006633;GO:0010311;GO:0016020;GO:0016702;GO:0031408;GO:0034440;GO:0046872;GO:1900366;	Lipids
														Vc2a210.31	no	yes	yes	normal	down	up	GO:0005789;GO:0005886;GO:0034219;GO:0051119;GO:0051260;	carbohydrate							Terpenoids							Alkaloids		Vc36a83.18	up	normal	up	GO:0000976;GO:0001666;GO:0003700;GO:0005634;GO:0006355;GO:0009617;GO:0009626;GO:0009644;GO:0009733;GO:0010100;GO:0010597;GO:0042761;	Lipids
														Vc2a24.20	no	yes	yes	normal	up	down	GO:0004553;GO:0005773;GO:0005975;GO:0016020;GO:0030246;	carbohydrate							Terpenoids							Alkaloids		Vc36a90.17	normal	up	normal	GO:0003989;GO:0006633;GO:0009317;GO:0009507;	Lipids
														Vc2a256.27	yes	yes	yes	down	up	down	GO:0005975;GO:0006817;GO:0015112;GO:0015113;GO:0015706;GO:0015707;GO:0016020;GO:0042128;GO:0050896;GO:0071944;	carbohydrate							Terpenoids							Alkaloids		Vc36p111.4	normal	up	down	GO:0006869;	Lipids
														Vc2a279.15	no	no	yes	normal	normal	up	GO:0000139;GO:0006486;GO:0008194;GO:0008378;GO:0030246;GO:0140103;	carbohydrate							Terpenoids							Alkaloids		Vc36p156.4	up	up	normal	GO:0000166;GO:0003878;GO:0005829;GO:0006099;GO:0006633;GO:0009911;GO:0010025;GO:0015995;GO:0016109;GO:0016116;GO:0016829;GO:0019252;GO:0035639;GO:0043481;GO:0045793;GO:0045995;GO:0048366;GO:0097367;GO:0140615;	Lipids
														Vc2a290.29	no	yes	yes	normal	down	up	GO:0000427;GO:0005515;GO:0005975;GO:0006355;GO:0009658;GO:0009662;GO:0016020;GO:0016301;GO:0016310;GO:0016773;GO:0042644;GO:0042793;	carbohydrate							Terpenoids							Alkaloids		Vc36p57.7	normal	down	up	GO:0009791;GO:0012511;GO:0016020;GO:0019915;GO:0021700;GO:0034389;GO:0044085;GO:0048608;GO:0048609;GO:0050826;	Lipids
														Vc2a301.24	yes	no	yes	up	normal	up	GO:0004553;GO:0005975;GO:0030246;	carbohydrate							Terpenoids							Alkaloids		Vc36s2.36	normal	up	down	GO:0000981;GO:0003677;GO:0005634;GO:0006357;GO:0008289;	Lipids
														Vc2a313.27	no	yes	yes	normal	up	down	GO:0003676;GO:0004674;GO:0005524;GO:0008270;GO:0016020;GO:0016310;GO:0030246;GO:0048544;GO:0051707;GO:0071944;GO:0106310;	carbohydrate							Terpenoids							Alkaloids		Vc37a13.31	normal	down	up	GO:0004315;GO:0005739;GO:0006633;GO:0010027;GO:0016020;	Lipids
														Vc2a405.41	no	yes	yes	normal	down	up	GO:0004560;GO:0005975;GO:0016020;	carbohydrate							Terpenoids							Alkaloids		Vc37a293.17	up	up	down	GO:0005506;GO:0008610;GO:0009924;GO:0016020;GO:0016491;GO:1990465;	Lipids
														Vc2a431.29	yes	yes	yes	down	up	down	GO:0004565;GO:0005773;GO:0005975;GO:0016020;GO:0030246;	carbohydrate							Terpenoids							Alkaloids		Vc37s150.21	normal	normal	up	GO:0000407;GO:0005942;GO:0006605;GO:0006869;GO:0006914;GO:0006995;GO:0007033;GO:0007034;GO:0008289;GO:0009846;GO:0016192;GO:0050832;GO:0070925;GO:0072666;	Lipids
														Vc2p203.4	no	yes	yes	normal	up	down	GO:0004672;GO:0005524;GO:0005886;GO:0016310;GO:0016787;GO:0030246;	carbohydrate							Terpenoids							Alkaloids		Vc37s182.37	normal	up	normal	GO:0004315;GO:0005739;GO:0006633;	Lipids
														Vc2p254.0	no	no	yes	normal	normal	up	GO:0004553;GO:0005840;GO:0005975;GO:0016020;GO:0016740;	carbohydrate							Terpenoids							Alkaloids		Vc37s21.35	normal	up	down	GO:0004190;GO:0005764;GO:0006508;GO:0006629;GO:0016020;GO:0044237;	Lipids
														Vc2p333.1	no	yes	no	normal	up	normal	GO:0000272;GO:0000325;GO:0000427;GO:0003677;GO:0003723;GO:0005515;GO:0005777;GO:0005829;GO:0005840;GO:0005996;GO:0006364;GO:0007623;GO:0009409;GO:0009506;GO:0009611;GO:0009658;GO:0009941;GO:0010287;GO:0010297;GO:0010319;GO:0032544;GO:0042631;GO:0045727;GO:0045893;GO:0048046;	carbohydrate							Terpenoids							Alkaloids		Vc37s258.30	normal	normal	down	GO:0009820;GO:0016020;GO:0016042;GO:0016787;	Lipids
														Vc2s11.46	no	no	yes	normal	normal	down	GO:0004610;GO:0005975;GO:0006048;GO:0016020;GO:0046872;	carbohydrate							Terpenoids							Alkaloids		Vc38a156.22	normal	normal	up	GO:0000407;GO:0005942;GO:0006605;GO:0006869;GO:0006914;GO:0006995;GO:0007033;GO:0007034;GO:0008289;GO:0009846;GO:0016192;GO:0050832;GO:0070925;GO:0072666;	Lipids
														Vc2s115.31	yes	no	no	up	normal	normal	GO:0004557;GO:0005975;	carbohydrate							Terpenoids							Alkaloids		Vc38a24.32	normal	normal	up	GO:0000325;GO:0001101;GO:0005739;GO:0005783;GO:0005794;GO:0005829;GO:0006629;GO:0006883;GO:0006979;GO:0009506;GO:0009644;GO:0009898;GO:0009941;GO:0010035;GO:0010286;GO:0010431;GO:0030644;GO:0042170;GO:0042538;GO:0045735;GO:0050826;GO:0071456;GO:1901002;GO:1901562;GO:1901700;GO:1902884;	Lipids
														Vc2s192.39	no	yes	yes	normal	up	down	GO:0004693;GO:0005459;GO:0005460;GO:0005794;GO:0008643;GO:0015297;GO:0015786;GO:0016020;GO:0051301;GO:0051726;GO:0072334;	carbohydrate							Terpenoids							Alkaloids		Vc38a264.51	up	up	normal	GO:0005576;GO:0016020;GO:0016042;GO:0016788;	Lipids
														Vc2s237.30	no	yes	yes	normal	up	down	GO:0005886;GO:0008643;GO:0051119;GO:0055085;	carbohydrate							Terpenoids							Alkaloids		Vc38a282.38	up	normal	up	GO:0005737;GO:0008202;GO:0008610;GO:0009646;GO:0010422;GO:0016020;GO:0016229;GO:0016616;GO:0042445;GO:1901362;GO:1901615;	Lipids
														Vc2s259.35	no	yes	yes	normal	up	down	GO:0004650;GO:0005975;GO:0016020;GO:0016301;GO:0016310;GO:0016829;GO:0047911;	carbohydrate							Terpenoids							Alkaloids		Vc38a39.29	normal	normal	down	GO:0005737;GO:0006869;GO:0008289;GO:0012505;GO:0016020;GO:0043227;GO:0043228;GO:0043229;GO:0046872;	Lipids
														Vc2s358.38	no	yes	yes	normal	up	down	GO:0004348;GO:0005975;GO:0006680;GO:0016020;	carbohydrate							Terpenoids							Alkaloids		Vc38a55.19	normal	normal	down	GO:0016042;	Lipids
														Vc2s50.28	yes	yes	no	up	up	normal	GO:0004674;GO:0004714;GO:0005524;GO:0016020;GO:0016310;GO:0030246;	carbohydrate							Terpenoids							Alkaloids		Vc38s265.44	normal	down	up	GO:0004315;GO:0005739;GO:0006633;GO:0010027;GO:0016020;	Lipids
														Vc300a0.35	no	no	yes	normal	normal	up	GO:0000786;GO:0003677;GO:0004672;GO:0005524;GO:0005634;GO:0005886;GO:0006334;GO:0006355;GO:0016310;GO:0030246;	carbohydrate							Terpenoids							Alkaloids		Vc38s28.29	normal	normal	down	GO:0008289;GO:0016301;GO:0016310;	Lipids
														Vc30a132.30	yes	yes	yes	up	up	up	GO:0005351;GO:0006817;GO:0016020;GO:0032440;GO:0034219;GO:0050896;GO:1902600;	carbohydrate							Terpenoids							Alkaloids		Vc38s292.28	normal	up	down	GO:0006869;GO:0008289;GO:0016020;	Lipids
														Vc30a150.47	no	yes	yes	normal	up	down	GO:0005459;GO:0005460;GO:0005794;GO:0008643;GO:0009553;GO:0009555;GO:0015297;GO:0015786;GO:0016020;GO:0030968;GO:0072334;GO:0098827;	carbohydrate							Terpenoids							Alkaloids		Vc39a27.20	normal	up	down	GO:0005829;GO:0008289;GO:0009536;	Lipids
														Vc30a263.27	no	yes	yes	normal	up	down	GO:0005355;GO:0005459;GO:0005794;GO:0008643;GO:0015297;GO:0016020;GO:0071944;GO:0072334;	carbohydrate							Terpenoids							Alkaloids		Vc39a278.15	normal	up	down	GO:0004190;GO:0006508;GO:0006629;GO:0016020;	Lipids
														Vc30a296.31	no	yes	yes	normal	up	down	GO:0004571;GO:0005509;GO:0005737;GO:0005975;GO:0012505;GO:0016020;GO:0043231;	carbohydrate							Terpenoids							Alkaloids		Vc39p237.0	normal	up	down	GO:0008970;GO:0016042;	Lipids
														Vc30a44.29	no	yes	yes	normal	up	down	GO:0004565;GO:0005773;GO:0005975;GO:0030246;	carbohydrate							Terpenoids							Alkaloids		Vc3a111.29	normal	down	up	GO:0005783;GO:0006633;GO:0009409;GO:0009416;GO:0009922;GO:0010025;GO:0016020;GO:0016491;GO:0016829;GO:0048868;GO:0090378;	Lipids
														Vc30a78.31	no	no	yes	normal	normal	down	GO:0006817;GO:0008643;GO:0016020;GO:0022857;GO:0032440;GO:0050896;GO:0055085;	carbohydrate							Terpenoids							Alkaloids		Vc3a133.27	up	up	normal	GO:0006633;GO:0009813;GO:0009922;GO:0016020;	Lipids
														Vc30p67.1	no	no	yes	normal	normal	down	GO:0001678;GO:0004396;GO:0005524;GO:0005536;GO:0005739;GO:0005829;GO:0006096;GO:0019318;GO:0046835;GO:0051156;	carbohydrate							Terpenoids							Alkaloids		Vc3a218.15	normal	up	down	GO:0005737;GO:0007049;GO:0008289;GO:0016020;GO:0051301;	Lipids
														Vc30s128.22	no	no	yes	normal	normal	down	GO:0003676;GO:0004523;GO:0005975;GO:0006952;GO:0016020;GO:0016301;GO:0016310;GO:0042973;	carbohydrate							Terpenoids							Alkaloids		Vc3a222.38	normal	down	up	GO:0005829;GO:0006720;GO:0012511;GO:0016020;GO:0016491;GO:0050661;	Lipids
														Vc30s328.35	no	yes	yes	normal	up	down	GO:0004674;GO:0005524;GO:0016020;GO:0016310;GO:0030246;	carbohydrate							Terpenoids							Alkaloids		Vc3a34.30	normal	up	normal	GO:0005886;GO:0006869;GO:0008289;GO:0098552;	Lipids
														Vc30s82.54	no	yes	yes	normal	up	down	GO:0004568;GO:0005576;GO:0005773;GO:0005975;GO:0006032;GO:0006952;GO:0008061;GO:0009620;GO:0016998;	carbohydrate							Terpenoids							Alkaloids		Vc3a343.17	normal	normal	down	GO:0005516;GO:0005758;GO:0008202;GO:0008610;GO:0008757;GO:0009055;GO:0009808;GO:0009826;GO:0009834;GO:0016020;GO:0016226;GO:0022900;GO:0042445;GO:0046872;GO:0050614;GO:0051537;GO:0051539;GO:0071949;GO:1901362;GO:1901617;	Lipids
														Vc31a299.28	no	yes	yes	normal	up	down	GO:0004672;GO:0005524;GO:0005886;GO:0016310;GO:0030246;	carbohydrate							Terpenoids							Alkaloids		Vc3a82.27	up	normal	up	GO:0006633;GO:0009922;GO:0016020;	Lipids
														Vc31a334.43	no	yes	yes	normal	up	down	GO:0000325;GO:0006817;GO:0008643;GO:0009409;GO:0009414;GO:0009744;GO:0009749;GO:0009750;GO:0016020;GO:0019900;GO:0022857;GO:0032440;GO:0055085;	carbohydrate							Terpenoids							Alkaloids		Vc3p15.8	normal	up	down	GO:0000287;GO:0004743;GO:0005524;GO:0005737;GO:0006096;GO:0006629;GO:0010431;GO:0015979;GO:0016301;GO:0016310;GO:0030955;GO:0043231;	Lipids
														Vc31s209.23	no	yes	yes	normal	down	up	GO:0006817;GO:0015293;GO:0016020;GO:0032440;GO:0034219;GO:0050896;GO:0051119;	carbohydrate							Terpenoids							Alkaloids		Vc3p190.1	down	up	down	GO:0005504;GO:0009627;GO:0016020;	Lipids
														Vc31s210.37	yes	yes	no	up	up	normal	GO:0006817;GO:0015293;GO:0016020;GO:0034219;GO:0051119;	carbohydrate							Terpenoids							Alkaloids		Vc3p385.0	up	normal	up	GO:0000981;GO:0003677;GO:0005634;GO:0006357;GO:0008289;	Lipids
														Vc32a1.28	no	no	yes	normal	normal	down	GO:0001678;GO:0004396;GO:0005524;GO:0005536;GO:0005739;GO:0005829;GO:0006096;GO:0009507;GO:0016020;GO:0019318;GO:0046835;GO:0051156;	carbohydrate							Terpenoids							Alkaloids		Vc3p416.6	normal	up	down	GO:0006629;GO:0016020;GO:0016491;	Lipids
														Vc32a142.28	no	yes	yes	normal	up	down	GO:0005459;GO:0005460;GO:0005794;GO:0008643;GO:0009553;GO:0009555;GO:0015297;GO:0015711;GO:0015931;GO:0016020;GO:0030968;GO:0055085;GO:0098827;GO:1901264;	carbohydrate							Terpenoids							Alkaloids		Vc3p55.9	normal	up	down	GO:0008289;	Lipids
														Vc32a61.31	no	no	yes	normal	normal	down	GO:0006817;GO:0008643;GO:0016020;GO:0022857;GO:0032440;GO:0050896;GO:0055085;	carbohydrate							Terpenoids							Alkaloids		Vc3s228.41	normal	down	up	GO:0005576;GO:0006629;GO:0016020;GO:0016788;GO:1901575;	Lipids
														Vc32a7.29	no	yes	no	normal	up	normal	GO:0003825;GO:0004805;GO:0006817;GO:0008519;GO:0015145;GO:0015293;GO:0015749;GO:0016020;GO:0032440;GO:0050896;GO:0072488;	carbohydrate							Terpenoids							Alkaloids		Vc405a0.15	normal	up	down	GO:0005737;GO:0007049;GO:0008289;GO:0016020;GO:0051301;	Lipids
														Vc32a81.39	yes	yes	no	up	up	normal	GO:0005351;GO:0006817;GO:0016020;GO:0032440;GO:0034219;GO:0050896;GO:1902600;	carbohydrate							Terpenoids							Alkaloids		Vc40p247.16	normal	up	down	GO:0004630;GO:0005509;GO:0016020;GO:0016042;GO:0044248;GO:0046434;GO:0046470;GO:0070290;GO:0071944;	Lipids
														Vc32p287.2	no	yes	yes	normal	up	down	GO:0004674;GO:0005524;GO:0016020;GO:0016310;GO:0030246;	carbohydrate							Terpenoids							Alkaloids		Vc41a231.31	normal	up	down	GO:0004630;GO:0005509;GO:0016020;GO:0016042;GO:0044248;GO:0046434;GO:0046470;GO:0070290;GO:0071944;	Lipids
														Vc32p325.3	no	yes	yes	normal	up	down	GO:0004571;GO:0005509;GO:0005737;GO:0005975;GO:0012505;GO:0016020;GO:0043231;	carbohydrate							Terpenoids							Alkaloids		Vc41a25.33	normal	up	normal	GO:0004622;GO:0006629;GO:0008374;GO:0016020;GO:0102545;	Lipids
														Vc32p36.24	no	yes	yes	normal	up	down	GO:0004565;GO:0005773;GO:0005975;GO:0030246;	carbohydrate							Terpenoids							Alkaloids		Vc42a149.30	normal	up	down	GO:0006071;GO:0006629;GO:0008889;GO:0016020;	Lipids
														Vc32s281.36	no	yes	yes	normal	up	down	GO:0004034;GO:0016020;GO:0019318;GO:0030246;GO:0046365;	carbohydrate							Terpenoids							Alkaloids		Vc42a199.39	normal	up	down	GO:0002238;GO:0004310;GO:0005783;GO:0006722;GO:0008610;GO:0009723;GO:0009751;GO:0009753;GO:0016125;GO:0016135;GO:0031090;GO:0031984;GO:0042175;GO:0042542;GO:0044249;GO:0045338;GO:0046872;GO:0051996;GO:0071731;GO:1901362;GO:1901617;GO:1902438;	Lipids
														Vc32s66.30	no	yes	yes	normal	up	down	GO:0004568;GO:0005576;GO:0005773;GO:0005975;GO:0006032;GO:0006952;GO:0008061;GO:0009620;GO:0016998;	carbohydrate							Terpenoids							Alkaloids		Vc42a24.22	normal	down	up	GO:0004630;GO:0005509;GO:0016020;GO:0016042;GO:0046470;GO:0070290;	Lipids
														Vc338s0.31	no	yes	yes	normal	up	down	GO:0004553;GO:0005975;GO:0009507;GO:0016020;	carbohydrate							Terpenoids							Alkaloids		Vc42a8.27	up	normal	up	GO:0002213;GO:0009055;GO:0016020;GO:0016042;GO:0016788;GO:0016874;GO:0022900;	Lipids
														Vc33a1.30	no	yes	no	normal	up	normal	GO:0005634;GO:0005975;GO:0006325;GO:0006952;GO:0016020;GO:0042973;GO:0046872;	carbohydrate							Terpenoids							Alkaloids		Vc42s42.34	up	normal	up	GO:0000038;GO:0005634;GO:0005789;GO:0005829;GO:0006633;GO:0016740;GO:0030148;GO:0030154;GO:0048640;GO:0050732;GO:0051302;GO:0098796;GO:0102158;GO:0140534;GO:1990234;	Lipids
														Vc33a101.20	yes	no	no	down	normal	normal	GO:0004553;GO:0005576;GO:0005975;GO:0009057;GO:0016020;	carbohydrate							Terpenoids							Alkaloids		Vc43a200.32	normal	normal	up	GO:0000287;GO:0004743;GO:0005524;GO:0005739;GO:0006096;GO:0006633;GO:0009570;GO:0010431;GO:0015979;GO:0016020;GO:0016301;GO:0016310;GO:0030955;	Lipids
														Vc33a18.30	no	no	yes	normal	normal	down	GO:0004650;GO:0005975;GO:0033917;GO:0047911;	carbohydrate							Terpenoids							Alkaloids		Vc43a35.19	normal	normal	up	GO:0006629;GO:0009820;GO:0016020;GO:0016787;	Lipids
														Vc33a254.25	no	yes	yes	normal	up	down	GO:0000325;GO:0004564;GO:0005576;GO:0005775;GO:0005975;GO:0009414;GO:0009617;GO:0009651;GO:0009737;GO:0009755;GO:0016020;GO:0030246;GO:0071370;GO:0097306;	carbohydrate							Terpenoids							Alkaloids		Vc43p222.43	normal	down	up	GO:0008289;	Lipids
														Vc33a283.24	yes	yes	no	up	up	normal	GO:0004650;GO:0005975;GO:0016020;GO:0016829;GO:0047911;	carbohydrate							Terpenoids							Alkaloids		Vc43p222.9	down	up	down	GO:0005576;GO:0008289;	Lipids
														Vc33a297.25	yes	yes	yes	up	up	down	GO:0006817;GO:0008643;GO:0016020;GO:0022857;GO:0032440;GO:0032981;GO:0050896;GO:0055085;	carbohydrate							Terpenoids							Alkaloids		Vc43s144.22	up	up	normal	GO:0006629;GO:0006637;GO:0010345;GO:0016020;GO:0043231;GO:0080019;GO:0102965;	Lipids
														Vc33a312.24	yes	yes	no	up	up	normal	GO:0004565;GO:0005773;GO:0005975;GO:0016020;GO:0030246;	carbohydrate							Terpenoids							Alkaloids		Vc43s57.35	up	up	normal	GO:0006633;GO:0009507;GO:0016297;	Lipids
														Vc33a315.24	no	no	yes	normal	normal	down	GO:0001678;GO:0004396;GO:0005524;GO:0005536;GO:0005739;GO:0005829;GO:0006096;GO:0009507;GO:0016020;GO:0019318;GO:0046835;GO:0051156;	carbohydrate							Terpenoids							Alkaloids		Vc44a142.17	normal	down	up	GO:0003677;GO:0003700;GO:0005634;GO:0006355;GO:0008289;GO:0016020;GO:0030154;	Lipids
														Vc33a325.28	no	no	yes	normal	normal	down	GO:0001678;GO:0004396;GO:0005524;GO:0005536;GO:0005739;GO:0005829;GO:0006096;GO:0009507;GO:0016020;GO:0019318;GO:0046835;GO:0051156;	carbohydrate							Terpenoids							Alkaloids		Vc44a160.13	up	up	normal	GO:0005504;GO:0009627;	Lipids
														Vc33a38.28	yes	yes	no	up	up	normal	GO:0005829;GO:0005975;GO:0006116;GO:0009331;GO:0046168;GO:0047952;GO:0051287;	carbohydrate							Terpenoids							Alkaloids		Vc44a222.27	normal	up	normal	GO:0005737;GO:0006633;GO:0016702;GO:0031408;GO:0034440;GO:0046872;	Lipids
														Vc33p292.4	no	yes	yes	normal	up	down	GO:0002239;GO:0004672;GO:0004888;GO:0005524;GO:0007178;GO:0009617;GO:0016020;GO:0016310;GO:0030246;GO:0071944;GO:0098542;	carbohydrate							Terpenoids							Alkaloids		Vc44a227.23	normal	normal	up	GO:0006629;GO:0016020;GO:0016717;GO:0016720;GO:0045485;GO:0072330;GO:0098827;	Lipids
														Vc34a17.21	yes	yes	no	up	up	normal	GO:0004553;GO:0005515;GO:0005576;GO:0005775;GO:0005975;GO:0009611;GO:0016020;GO:0050832;GO:0071944;	carbohydrate							Terpenoids							Alkaloids		Vc44a234.29	up	up	normal	GO:0005576;GO:0005634;GO:0005886;GO:0006869;GO:0008289;GO:0050832;GO:0098552;	Lipids
														Vc34a182.35	no	no	yes	normal	normal	down	GO:0003924;GO:0005509;GO:0005525;GO:0005788;GO:0005789;GO:0006457;GO:0030246;GO:0030433;GO:0051082;	carbohydrate							Terpenoids							Alkaloids		Vc44s27.23	normal	up	normal	GO:0006629;GO:0008970;GO:0009534;GO:0009820;GO:0015908;GO:0016020;GO:0044249;GO:0052739;GO:1901576;	Lipids
														Vc34a182.36	no	yes	yes	normal	up	down	GO:0004427;GO:0005509;GO:0005783;GO:0006457;GO:0009678;GO:0016020;GO:0016491;GO:0030246;GO:0051082;GO:1902600;	carbohydrate							Terpenoids							Alkaloids		Vc44s77.24	normal	up	down	GO:0004630;GO:0005737;GO:0006869;GO:0008289;GO:0012505;GO:0016020;GO:0043227;GO:0043228;GO:0043229;GO:0046872;GO:0070290;	Lipids
														Vc34a19.23	no	yes	yes	normal	up	down	GO:0004565;GO:0005773;GO:0005975;GO:0009505;GO:0016020;GO:0030246;GO:0048046;	carbohydrate							Terpenoids							Alkaloids		Vc45a10.20	up	up	normal	GO:0006629;GO:0016020;GO:0016627;	Lipids
														Vc34a25.19	yes	no	yes	up	normal	up	GO:0004470;GO:0004553;GO:0005524;GO:0005975;GO:0006108;GO:0009536;GO:0016020;GO:0016616;GO:0016887;GO:0046872;GO:0051287;GO:0055085;GO:0140359;	carbohydrate							Terpenoids							Alkaloids		Vc45a163.26	normal	down	up	GO:0005789;GO:0006629;GO:0140042;	Lipids
														Vc34a252.29	no	yes	yes	normal	up	down	GO:0003676;GO:0005634;GO:0005829;GO:0005886;GO:0006979;GO:0008865;GO:0009408;GO:0009409;GO:0009506;GO:0016787;GO:0034337;GO:0046835;GO:0061077;	carbohydrate							Terpenoids							Alkaloids		Vc45a31.29	normal	up	down	GO:0003735;GO:0005576;GO:0005840;GO:0006412;GO:0016020;GO:0017040;GO:0042759;GO:0046512;GO:0046514;GO:0102121;GO:1990904;	Lipids
														Vc34a311.28	yes	yes	no	up	up	normal	GO:0004672;GO:0005524;GO:0005975;GO:0008061;GO:0016020;GO:0016310;GO:0016787;GO:0030246;GO:0071944;	carbohydrate							Terpenoids							Alkaloids		Vc45a59.28	normal	up	down	GO:0004190;GO:0006629;	Lipids
														Vc34a39.33	no	yes	yes	normal	up	down	GO:0004650;GO:0005515;GO:0005576;GO:0005975;GO:0016020;GO:0016829;GO:0047911;GO:0071555;	carbohydrate							Terpenoids							Alkaloids		Vc45p28.4	normal	up	down	GO:0003735;GO:0005576;GO:0005840;GO:0006412;GO:0016020;GO:0017040;GO:0042759;GO:0046512;GO:0046514;GO:0102121;GO:1990904;	Lipids
														Vc34a45.21	no	yes	yes	normal	up	down	GO:0004370;GO:0005524;GO:0005739;GO:0006072;GO:0006641;GO:0016310;GO:0019563;GO:0090407;GO:1901137;	carbohydrate							Terpenoids							Alkaloids		Vc46a73.17	down	normal	normal	GO:0005783;GO:0005886;GO:0008289;GO:0009626;GO:0009751;GO:0009873;GO:0010008;GO:0016301;GO:0016310;GO:0031640;GO:0031984;GO:0042175;GO:0050832;GO:1900056;GO:1900150;	Lipids
														Vc34a98.23	yes	no	yes	up	normal	up	GO:0005794;GO:0015114;GO:0015120;GO:0015297;GO:0015355;GO:0015605;GO:0015713;GO:0015748;GO:0031969;GO:1901264;GO:1901505;	carbohydrate							Terpenoids							Alkaloids		Vc46a89.30	normal	normal	up	GO:0004017;GO:0005739;GO:0006633;GO:0009853;GO:0010027;GO:0016020;GO:0019171;GO:0046940;	Lipids
														Vc34s18.25	no	yes	yes	normal	up	down	GO:0004556;GO:0005509;GO:0005975;GO:0009737;GO:0009739;GO:0016020;GO:0043170;GO:0048046;GO:1901575;	carbohydrate							Terpenoids							Alkaloids		Vc46p25.4	normal	down	up	GO:0008289;	Lipids
														Vc34s209.23	no	yes	yes	normal	up	down	GO:0003735;GO:0004348;GO:0005840;GO:0005975;GO:0006412;GO:0006680;GO:0008422;GO:0016020;GO:1990904;	carbohydrate							Terpenoids							Alkaloids		Vc46p41.0	up	up	normal	GO:0004620;GO:0006629;GO:0009820;GO:0052689;	Lipids
														Vc34s56.47	no	no	yes	normal	normal	down	GO:0000165;GO:0004672;GO:0005524;GO:0005975;GO:0016020;GO:0016310;GO:0016853;GO:0030246;GO:0043539;	carbohydrate							Terpenoids							Alkaloids		Vc47a144.33	up	up	normal	GO:0006633;GO:0009507;GO:0016297;	Lipids
														Vc34s59.36	no	yes	yes	normal	up	down	GO:0004601;GO:0005509;GO:0007231;GO:0009408;GO:0009611;GO:0016020;GO:0033500;GO:0043069;GO:0050664;GO:0050832;GO:0071944;GO:0072593;GO:0098869;	carbohydrate							Terpenoids							Alkaloids		Vc47a175.25	up	up	normal	GO:0005773;GO:0016042;GO:0016298;GO:0045735;	Lipids
														Vc35a107.18	no	yes	yes	normal	up	down	GO:0016301;GO:0016310;GO:0030246;	carbohydrate							Terpenoids							Alkaloids		Vc47p164.4	normal	normal	up	GO:0006629;GO:0009820;GO:0016020;GO:0016787;	Lipids
														Vc35a222.16	no	yes	yes	normal	up	down	GO:0004556;GO:0005509;GO:0005975;GO:0016020;GO:1901575;	carbohydrate							Terpenoids							Alkaloids		Vc47s54.13	up	up	normal	GO:0006629;GO:0006637;GO:0010345;GO:0016020;GO:0043231;GO:0080019;GO:0102965;	Lipids
														Vc35a262.27	no	yes	yes	normal	down	up	GO:0000165;GO:0004672;GO:0005524;GO:0005886;GO:0009755;GO:0016310;GO:0017018;GO:0030246;GO:0038023;GO:0050832;	carbohydrate							Terpenoids							Alkaloids		Vc48a22.32	normal	normal	up	GO:0003746;GO:0003924;GO:0005525;GO:0005634;GO:0005829;GO:0005840;GO:0006397;GO:0006414;GO:0006629;GO:0008380;GO:0009536;GO:0016298;GO:0030623;GO:0120114;GO:1902494;GO:1990904;	Lipids
														Vc35a54.42	no	yes	yes	normal	up	down	GO:0004568;GO:0005576;GO:0005794;GO:0005975;GO:0006032;GO:0006952;GO:0008061;GO:0009059;GO:0009408;GO:0009414;GO:0009651;GO:0009735;GO:0009825;GO:0010053;GO:0010167;GO:0010337;GO:0016020;GO:0016688;GO:0016998;GO:0030247;GO:0090379;GO:0098869;	carbohydrate							Terpenoids							Alkaloids		Vc48a57.30	normal	up	down	GO:0005773;GO:0016042;GO:0016298;GO:0016740;GO:0045735;	Lipids
														Vc35a79.34	no	no	yes	normal	normal	down	GO:0004462;GO:0005737;GO:0005975;GO:0019243;GO:0046872;	carbohydrate							Terpenoids							Alkaloids		Vc48a62.48	up	up	normal	GO:0006633;GO:0009922;GO:0016020;	Lipids
														Vc35a82.30	no	yes	yes	normal	up	down	GO:0004553;GO:0005975;	carbohydrate							Terpenoids							Alkaloids		Vc48a87.31	normal	down	up	GO:0005576;GO:0009791;GO:0012511;GO:0016020;GO:0019915;GO:0019953;GO:0021700;GO:0034389;GO:0048608;GO:0048609;	Lipids
														Vc35a84.23	no	yes	yes	normal	up	down	GO:0004553;GO:0005975;GO:0009617;	carbohydrate							Terpenoids							Alkaloids		Vc49a4.28	normal	normal	up	GO:0003676;GO:0004523;GO:0005634;GO:0008289;GO:0016020;GO:0016757;	Lipids
														Vc35a84.24	no	yes	yes	normal	up	down	GO:0004553;GO:0005975;	carbohydrate							Terpenoids							Alkaloids		Vc4a11.38	up	up	down	GO:0000166;GO:0003878;GO:0005737;GO:0006085;GO:0006099;GO:0006629;GO:0016829;GO:0016874;GO:0035639;GO:0046872;GO:0072330;GO:0097367;	Lipids
														Vc35a94.33	yes	yes	no	up	up	normal	GO:0004674;GO:0004713;GO:0005524;GO:0015267;GO:0016020;GO:0016310;GO:0030246;GO:0048544;GO:0051707;GO:0055085;GO:0071944;GO:0106310;	carbohydrate							Terpenoids							Alkaloids		Vc4a173.16	up	normal	up	GO:0000981;GO:0003677;GO:0005634;GO:0006357;GO:0008289;	Lipids
														Vc35s201.18	yes	yes	no	up	up	normal	GO:0000166;GO:0003878;GO:0005829;GO:0006099;GO:0006633;GO:0009911;GO:0010025;GO:0015995;GO:0016109;GO:0016116;GO:0016829;GO:0019252;GO:0035639;GO:0043481;GO:0045793;GO:0045995;GO:0048366;GO:0097367;GO:0140615;	carbohydrate							Terpenoids							Alkaloids		Vc4a18.23	up	normal	normal	GO:0006633;GO:0009507;GO:0016740;GO:0031177;GO:0044620;GO:0140414;	Lipids
														Vc36a148.45	no	no	yes	normal	normal	up	GO:0004791;GO:0005739;GO:0005975;GO:0006744;GO:0008289;GO:0009860;GO:0010183;GO:0016740;GO:0042973;GO:0046872;GO:0047134;GO:0080092;GO:0098869;	carbohydrate							Terpenoids							Alkaloids		Vc4a224.31	normal	up	normal	GO:0016042;GO:0016787;	Lipids
														Vc36a216.26	no	yes	yes	normal	up	down	GO:0001708;GO:0004568;GO:0005794;GO:0005975;GO:0006032;GO:0006952;GO:0008061;GO:0009059;GO:0009408;GO:0009414;GO:0009651;GO:0009735;GO:0009825;GO:0010053;GO:0010167;GO:0010337;GO:0016020;GO:0016688;GO:0016998;GO:0030247;GO:0048046;GO:0090379;GO:0098869;	carbohydrate							Terpenoids							Alkaloids		Vc4a3.28	up	up	normal	GO:0000166;GO:0003878;GO:0005737;GO:0006085;GO:0006099;GO:0006629;GO:0016829;GO:0016874;GO:0035639;GO:0046872;GO:0072330;GO:0097367;	Lipids
														Vc36a53.28	no	no	yes	normal	normal	up	GO:0005975;GO:0008378;GO:0052692;	carbohydrate							Terpenoids							Alkaloids		Vc4a349.23	normal	up	down	GO:0006071;GO:0006629;GO:0008081;GO:0016020;	Lipids
														Vc36a70.33	no	no	yes	normal	normal	down	GO:0000139;GO:0006486;GO:0008194;GO:0008378;GO:0010405;GO:0018208;GO:0030246;GO:0048354;GO:0140103;GO:1900056;	carbohydrate							Terpenoids							Alkaloids		Vc4a358.29	up	normal	up	GO:0000976;GO:0001666;GO:0003700;GO:0005634;GO:0006355;GO:0009617;GO:0009626;GO:0009644;GO:0009733;GO:0010100;GO:0010597;GO:0042761;	Lipids
														Vc36a76.25	no	no	yes	normal	normal	down	GO:0000139;GO:0006486;GO:0008194;GO:0008378;GO:0010405;GO:0018208;GO:0030246;GO:0048354;GO:0140103;GO:1900056;	carbohydrate							Terpenoids							Alkaloids		Vc4a38.26	up	up	normal	GO:0006633;GO:0009507;GO:0016020;GO:0016740;GO:0031177;GO:0044620;GO:0140414;	Lipids
														Vc36p156.4	yes	yes	no	up	up	normal	GO:0000166;GO:0003878;GO:0005829;GO:0006099;GO:0006633;GO:0009911;GO:0010025;GO:0015995;GO:0016109;GO:0016116;GO:0016829;GO:0019252;GO:0035639;GO:0043481;GO:0045793;GO:0045995;GO:0048366;GO:0097367;GO:0140615;	carbohydrate							Terpenoids							Alkaloids		Vc4a410.18	up	normal	normal	GO:0005737;GO:0006633;GO:0009555;GO:0009579;GO:0009611;GO:0009617;GO:0009694;GO:0009901;GO:0010193;GO:0016702;GO:0031408;GO:0034440;GO:0043231;GO:0046872;GO:0080086;	Lipids
														Vc36s162.28	no	no	yes	normal	normal	down	GO:0005737;GO:0005975;GO:0030246;GO:0047938;	carbohydrate							Terpenoids							Alkaloids		Vc4a423.32	normal	up	down	GO:0000981;GO:0003677;GO:0003723;GO:0005634;GO:0006357;GO:0008289;	Lipids
														Vc37a105.23	yes	no	yes	down	normal	down	GO:0005351;GO:0005773;GO:0005886;GO:0005985;GO:0006817;GO:0008515;GO:0015770;GO:0050896;GO:0055085;	carbohydrate							Terpenoids							Alkaloids		Vc4p161.5	normal	normal	down	GO:0006629;GO:0008374;GO:0016020;	Lipids
														Vc37a110.25	no	no	yes	normal	normal	down	GO:0005459;GO:0005460;GO:0005794;GO:0008643;GO:0015297;GO:0015786;GO:0016020;GO:0072334;	carbohydrate							Terpenoids							Alkaloids		Vc4p32.6	up	up	down	GO:0000166;GO:0003878;GO:0005737;GO:0006085;GO:0006099;GO:0006629;GO:0016829;GO:0016874;GO:0035639;GO:0046872;GO:0072330;GO:0097367;	Lipids
														Vc37a159.25	no	yes	no	normal	up	normal	GO:0005829;GO:0005975;GO:0006098;GO:0016853;GO:0017057;	carbohydrate							Terpenoids							Alkaloids		Vc4p332.11	normal	up	normal	GO:0006869;	Lipids
														Vc37a159.26	no	yes	yes	normal	up	down	GO:0005829;GO:0005975;GO:0006098;GO:0009507;GO:0016853;GO:0017057;	carbohydrate							Terpenoids							Alkaloids		Vc4s186.27	normal	down	normal	GO:0005737;GO:0006869;GO:0008289;GO:0012505;GO:0016020;GO:0043227;GO:0043229;GO:0046872;	Lipids
														Vc37a181.25	no	yes	yes	normal	down	up	GO:0004650;GO:0005975;GO:0016020;GO:0016829;GO:0047911;	carbohydrate							Terpenoids							Alkaloids		Vc4s297.30	up	up	normal	GO:0000166;GO:0003878;GO:0005829;GO:0006099;GO:0006633;GO:0009911;GO:0010025;GO:0015995;GO:0016109;GO:0016116;GO:0016829;GO:0019252;GO:0035639;GO:0043481;GO:0045793;GO:0045995;GO:0048366;GO:0097367;GO:0140615;	Lipids
														Vc37a235.39	yes	no	no	down	normal	normal	GO:0005737;GO:0005975;GO:0030246;GO:0047938;	carbohydrate							Terpenoids							Alkaloids		Vc50a6.31	normal	down	up	GO:0004303;GO:0004316;GO:0005811;GO:0005829;GO:0008202;GO:0008610;GO:0009507;GO:0016020;GO:0070523;GO:0070524;GO:0072582;GO:0102196;GO:1901362;	Lipids
														Vc37p170.0	no	yes	yes	normal	up	down	GO:0004553;GO:0005783;GO:0005975;GO:0006491;GO:0006952;GO:0009057;GO:0016020;GO:0030246;	carbohydrate							Terpenoids							Alkaloids		Vc50p7.9	up	up	normal	GO:0005811;GO:0005829;GO:0008202;GO:0008610;GO:0009507;GO:0016020;GO:0016491;GO:1901362;	Lipids
														Vc37s125.15	no	no	yes	normal	normal	down	GO:0005457;GO:0005459;GO:0005460;GO:0005794;GO:0008643;GO:0015297;GO:0015783;GO:0015786;GO:0016020;GO:0072334;	carbohydrate							Terpenoids							Alkaloids		Vc54a12.26	up	up	normal	GO:0005524;GO:0009611;GO:0009651;GO:0009737;GO:0009986;GO:0010222;GO:0010345;GO:0010588;GO:0015245;GO:0015562;GO:0015908;GO:0016020;GO:0016887;GO:0042335;GO:0042803;GO:0055085;GO:0071944;GO:0080051;GO:0090378;GO:0140359;	Lipids
														Vc37s156.37	no	yes	yes	normal	down	up	GO:0000428;GO:0003677;GO:0003729;GO:0003899;GO:0004553;GO:0005975;GO:0006351;GO:0016020;GO:0016810;GO:0035442;GO:0042937;GO:0042939;GO:0043227;GO:0043229;GO:0043233;GO:0046872;GO:0071916;	carbohydrate							Terpenoids							Alkaloids		Vc55a12.47	up	up	normal	GO:0006629;GO:0008081;GO:0016020;	Lipids
														Vc37s171.22	no	yes	yes	normal	down	up	GO:0004553;GO:0005975;GO:0030246;	carbohydrate							Terpenoids							Alkaloids		Vc56a5.29	normal	up	down	GO:0006629;GO:0008081;GO:0016020;	Lipids
														Vc37s171.23	no	yes	yes	normal	down	up	GO:0004565;GO:0005975;	carbohydrate							Terpenoids							Alkaloids		Vc57a6.30	up	up	normal	GO:0005516;GO:0005524;GO:0009536;GO:0009611;GO:0009651;GO:0009737;GO:0009986;GO:0010222;GO:0010345;GO:0010588;GO:0015245;GO:0015562;GO:0015908;GO:0016020;GO:0016887;GO:0042335;GO:0042803;GO:0055085;GO:0071944;GO:0080051;GO:0090378;GO:0140359;	Lipids
														Vc37s211.34	no	yes	yes	normal	up	down	GO:0003755;GO:0004801;GO:0005737;GO:0005975;GO:0006098;GO:0009749;GO:0009809;GO:0016020;GO:0043231;	carbohydrate							Terpenoids							Alkaloids		Vc57a7.37	up	up	up	GO:0005516;GO:0005524;GO:0009536;GO:0009611;GO:0009651;GO:0009737;GO:0009986;GO:0010222;GO:0010345;GO:0010588;GO:0015245;GO:0015562;GO:0015908;GO:0016020;GO:0016887;GO:0042335;GO:0042803;GO:0055085;GO:0071944;GO:0080051;GO:0090378;GO:0140359;	Lipids
														Vc385a0.21	no	yes	yes	normal	up	down	GO:0004563;GO:0005975;GO:0016020;GO:0030203;GO:0102148;	carbohydrate							Terpenoids							Alkaloids		Vc5a100.25	normal	up	down	GO:0003723;GO:0003735;GO:0005634;GO:0005737;GO:0006412;GO:0008289;GO:0015935;GO:0016020;	Lipids
														Vc38a127.30	no	yes	yes	normal	down	up	GO:0004650;GO:0005975;GO:0016020;GO:0016829;GO:0047911;	carbohydrate							Terpenoids							Alkaloids		Vc5a108.22	up	up	normal	GO:0006633;GO:0009922;GO:0016020;GO:0090378;	Lipids
														Vc38a149.20	no	yes	yes	normal	up	down	GO:0005975;GO:0016020;	carbohydrate							Terpenoids							Alkaloids		Vc5a126.29	normal	down	up	GO:0000325;GO:0004497;GO:0004601;GO:0005509;GO:0005783;GO:0009269;GO:0009409;GO:0009651;GO:0009737;GO:0009751;GO:0009941;GO:0010118;GO:0012511;GO:0016020;GO:0031407;GO:0050832;GO:0098869;GO:0102070;GO:1902609;GO:1990137;GO:2000377;	Lipids
														Vc38a150.20	no	yes	yes	normal	up	down	GO:0005829;GO:0005975;GO:0006098;GO:0009507;GO:0016853;GO:0017057;	carbohydrate							Terpenoids							Alkaloids		Vc5a14.25	normal	up	normal	GO:0000166;GO:0003878;GO:0005737;GO:0006085;GO:0006099;GO:0006629;GO:0016829;GO:0016874;GO:0035639;GO:0046872;GO:0072330;GO:0097367;	Lipids
														Vc38a150.21	no	yes	yes	normal	up	down	GO:0005829;GO:0005975;GO:0006098;GO:0016853;GO:0017057;	carbohydrate							Terpenoids							Alkaloids		Vc5a186.16	normal	up	down	GO:0004190;GO:0006629;GO:0016020;	Lipids
														Vc38a231.28	yes	no	no	up	normal	normal	GO:0000307;GO:0004672;GO:0005524;GO:0005634;GO:0016310;GO:0030246;GO:0032968;GO:0051726;GO:0140994;	carbohydrate							Terpenoids							Alkaloids		Vc5a261.18	normal	normal	down	GO:0003841;GO:0004623;GO:0004771;GO:0004806;GO:0005773;GO:0005777;GO:0006071;GO:0006641;GO:0012511;GO:0016020;GO:0016042;GO:0016301;GO:0016310;GO:0044248;GO:0045735;	Lipids
														Vc38a284.28	no	yes	yes	normal	up	down	GO:0004672;GO:0005524;GO:0005886;GO:0016310;GO:0030246;GO:0044419;GO:0050896;	carbohydrate							Terpenoids							Alkaloids		Vc5a281.31	normal	up	down	GO:0006629;GO:0016020;GO:0016717;GO:0045485;GO:0072330;	Lipids
														Vc38p27.7	yes	yes	no	up	up	normal	GO:0004553;GO:0005975;GO:0008061;	carbohydrate							Terpenoids							Alkaloids		Vc5a319.26	up	normal	normal	GO:0004722;GO:0006869;GO:0008289;GO:0016020;	Lipids
														Vc38p295.25	no	no	yes	normal	normal	down	GO:0005739;GO:0005829;GO:0006793;GO:0008242;GO:0008460;GO:0009225;GO:0009506;GO:0010280;GO:0010315;GO:0016491;GO:0016853;GO:0030154;GO:0034654;GO:0042127;GO:0050377;GO:0051555;GO:0071555;GO:1901137;	carbohydrate							Terpenoids							Alkaloids		Vc5a353.27	up	up	normal	GO:0005576;GO:0016020;GO:0016042;GO:0016788;	Lipids
														Vc38s138.28	no	yes	yes	normal	up	down	GO:0004553;GO:0005783;GO:0005975;GO:0006491;GO:0006952;GO:0009057;GO:0016020;GO:0030246;	carbohydrate							Terpenoids							Alkaloids		Vc5a37.39	normal	up	down	GO:0002933;GO:0004497;GO:0005506;GO:0016020;GO:0016705;GO:0020037;GO:0048653;GO:0051792;GO:0080110;	Lipids
														Vc38s153.30	no	yes	yes	normal	down	up	GO:0000428;GO:0003677;GO:0003729;GO:0003899;GO:0004553;GO:0005975;GO:0006305;GO:0006351;GO:0016020;GO:0016810;GO:0030422;GO:0035194;GO:0035442;GO:0042937;GO:0042939;GO:0043227;GO:0043228;GO:0043229;GO:0043233;GO:0043414;GO:0046872;GO:0050832;GO:0071916;	carbohydrate							Terpenoids							Alkaloids		Vc5a42.33	normal	up	down	GO:0006633;GO:0009507;GO:0009532;GO:0019904;GO:0031177;GO:0044620;GO:0140414;	Lipids
														Vc38s175.32	yes	no	yes	down	normal	down	GO:0005351;GO:0005773;GO:0005886;GO:0005985;GO:0006817;GO:0008515;GO:0015770;GO:0050896;GO:0055085;	carbohydrate							Terpenoids							Alkaloids		Vc5a55.26	normal	up	down	GO:0005737;GO:0006633;GO:0016020;GO:0016702;GO:0031408;GO:0034440;GO:0046872;	Lipids
														Vc38s26.24	no	yes	yes	normal	up	down	GO:0004672;GO:0005524;GO:0005975;GO:0008061;GO:0016020;GO:0016310;GO:0016787;GO:0030246;GO:0071944;	carbohydrate							Terpenoids							Alkaloids		Vc5a65.38	up	normal	up	GO:0005886;GO:0006869;GO:0008289;GO:0098552;	Lipids
														Vc38s27.39	no	yes	no	normal	up	normal	GO:0004553;GO:0005975;GO:0008061;GO:0016020;	carbohydrate							Terpenoids							Alkaloids		Vc5p20.7	normal	normal	up	GO:0016020;GO:0016042;	Lipids
														Vc38s44.21	no	yes	yes	normal	up	down	GO:0004557;GO:0005975;GO:0016020;GO:0047268;GO:0047274;	carbohydrate							Terpenoids							Alkaloids		Vc5s417.27	normal	down	normal	GO:0006071;GO:0006629;GO:0008081;GO:0016020;	Lipids
														Vc38s59.23	no	yes	yes	normal	up	down	GO:0000325;GO:0005576;GO:0005975;GO:0016020;GO:0030246;GO:0102210;GO:1901575;	carbohydrate							Terpenoids							Alkaloids		Vc64a6.32	up	up	normal	GO:0006633;GO:0009922;GO:0016020;	Lipids
														Vc39a133.33	no	yes	yes	normal	down	up	GO:0004650;GO:0005975;GO:0016020;GO:0016829;GO:0047911;	carbohydrate							Terpenoids							Alkaloids		Vc69a1.38	normal	up	down	GO:0000036;GO:0006633;GO:0009507;GO:0016020;GO:0016297;	Lipids
														Vc39a154.26	no	yes	yes	normal	up	down	GO:0005975;GO:0016020;	carbohydrate							Terpenoids							Alkaloids		Vc6a34.37	down	normal	down	GO:0006071;GO:0006629;GO:0008889;GO:0016020;	Lipids
														Vc39a154.28	no	yes	no	normal	up	normal	GO:0005829;GO:0005975;GO:0006098;GO:0016853;GO:0017057;	carbohydrate							Terpenoids							Alkaloids		Vc6a41.28	up	normal	up	GO:0006629;GO:0016020;GO:0016788;	Lipids
														Vc39a24.30	no	yes	yes	normal	up	down	GO:0004672;GO:0005524;GO:0005975;GO:0008061;GO:0016020;GO:0016310;GO:0016787;GO:0030246;GO:0071944;	carbohydrate							Terpenoids							Alkaloids		Vc6a412.16	normal	up	down	GO:0005506;GO:0006720;GO:0008610;GO:0009628;GO:0009924;GO:0016020;GO:0016491;GO:0098827;GO:1990465;	Lipids
														Vc39a40.28	no	yes	yes	normal	up	down	GO:0005975;GO:0016020;GO:0016787;GO:0047268;GO:0047274;	carbohydrate							Terpenoids							Alkaloids		Vc6a89.33	up	up	normal	GO:0005576;GO:0016020;GO:0016042;GO:0016788;	Lipids
														Vc39a60.19	no	yes	yes	normal	up	down	GO:0000325;GO:0005576;GO:0005975;GO:0016020;GO:0030246;GO:0102210;GO:1901575;	carbohydrate							Terpenoids							Alkaloids		Vc6p153.8	normal	up	down	GO:0008970;GO:0016042;	Lipids
														Vc39p25.5	yes	yes	no	up	up	normal	GO:0004553;GO:0005576;GO:0005975;GO:0006032;GO:0008061;	carbohydrate							Terpenoids							Alkaloids		Vc6s35.34	normal	down	normal	GO:0006071;GO:0006629;GO:0008889;GO:0016020;	Lipids
														Vc39p60.2	yes	yes	no	up	up	normal	GO:0005576;GO:0005975;GO:0016020;GO:0030246;GO:0102210;GO:1901575;	carbohydrate							Terpenoids							Alkaloids		Vc6s367.34	normal	normal	down	GO:0016020;GO:0016042;	Lipids
														Vc39s143.27	no	yes	no	normal	down	normal	GO:0005975;GO:0016798;GO:0048046;	carbohydrate							Terpenoids							Alkaloids		Vc6s386.26	normal	up	down	GO:0008289;GO:0016301;GO:0016310;	Lipids
														Vc39s144.23	no	yes	yes	normal	up	down	GO:0004553;GO:0005975;GO:0006491;GO:0016020;GO:0030246;	carbohydrate							Terpenoids							Alkaloids		Vc6s75.29	normal	up	down	GO:0000325;GO:0006869;GO:0008289;GO:0016020;GO:0046872;	Lipids
														Vc39s24.35	no	yes	yes	normal	up	down	GO:0004672;GO:0005524;GO:0005975;GO:0008061;GO:0016020;GO:0016310;GO:0016787;GO:0030246;GO:0071944;	carbohydrate							Terpenoids							Alkaloids		Vc6s88.56	normal	down	up	GO:0004315;GO:0005739;GO:0006633;GO:0010027;GO:0016020;	Lipids
														Vc3a160.11	no	no	yes	normal	normal	up	GO:0000139;GO:0006486;GO:0008194;GO:0008378;GO:0030246;GO:0140103;	carbohydrate							Terpenoids							Alkaloids		Vc6s99.34	normal	up	down	GO:0004190;GO:0005764;GO:0006508;GO:0006629;GO:0016020;GO:0044237;	Lipids
														Vc3a232.27	no	yes	yes	normal	down	up	GO:0005789;GO:0005886;GO:0034219;GO:0051119;GO:0051260;	carbohydrate							Terpenoids							Alkaloids		Vc71p1.8	normal	down	up	GO:0005524;GO:0005739;GO:0005856;GO:0006744;GO:0008289;	Lipids
														Vc3a249.22	no	yes	yes	normal	up	down	GO:0004693;GO:0005457;GO:0005459;GO:0005460;GO:0005794;GO:0008643;GO:0015297;GO:0015783;GO:0015786;GO:0016020;GO:0051301;GO:0051726;GO:0072334;	carbohydrate							Terpenoids							Alkaloids		Vc794a0.7	up	up	normal	GO:0006633;GO:0009922;GO:0016020;	Lipids
														Vc3a310.36	no	no	yes	normal	normal	up	GO:0003839;GO:0004553;GO:0005737;GO:0005975;GO:0006751;GO:0016020;GO:0016740;GO:0061928;	carbohydrate							Terpenoids							Alkaloids		Vc7a251.20	normal	up	normal	GO:0005773;GO:0006952;GO:0016020;GO:0016042;GO:0016298;GO:0016740;GO:0045735;GO:0052689;	Lipids
														Vc3a317.34	no	yes	yes	normal	up	down	GO:0004674;GO:0005524;GO:0005886;GO:0016310;GO:0030246;GO:0050832;	carbohydrate							Terpenoids							Alkaloids		Vc7a27.35	normal	up	normal	GO:0005773;GO:0016042;GO:0016298;GO:0045735;GO:0052689;	Lipids
														Vc3a407.37	no	yes	yes	normal	up	down	GO:0003676;GO:0004553;GO:0005975;GO:0015074;GO:0030246;	carbohydrate							Terpenoids							Alkaloids		Vc7a27.36	normal	up	normal	GO:0005773;GO:0016042;GO:0016298;GO:0016853;GO:0045735;GO:0052689;	Lipids
														Vc3a416.27	no	yes	yes	normal	up	down	GO:0004553;GO:0005773;GO:0005975;GO:0016020;GO:0030246;	carbohydrate							Terpenoids							Alkaloids		Vc7a366.35	normal	down	up	GO:0006869;GO:0008289;	Lipids
														Vc3a84.39	no	yes	yes	normal	up	down	GO:0004252;GO:0005355;GO:0005459;GO:0005794;GO:0006508;GO:0008643;GO:0015297;GO:0016020;GO:0071944;GO:0072334;	carbohydrate							Terpenoids							Alkaloids		Vc7a383.31	up	up	normal	GO:0004601;GO:0006633;GO:0006952;GO:0006979;GO:0016020;GO:0016701;GO:0020037;GO:0031408;GO:0046872;GO:0051213;GO:0098869;	Lipids
														Vc3a99.25	no	yes	yes	normal	up	down	GO:0003676;GO:0004674;GO:0005516;GO:0005524;GO:0008270;GO:0009506;GO:0016020;GO:0016310;GO:0030246;GO:0031625;GO:0048544;GO:0051707;GO:0071944;GO:0106310;	carbohydrate							Terpenoids							Alkaloids		Vc7a50.34	normal	up	down	GO:0003887;GO:0005737;GO:0006869;GO:0006979;GO:0008289;GO:0012505;GO:0016020;GO:0016688;GO:0020037;GO:0043227;GO:0043229;GO:0046872;GO:0071897;GO:0098869;	Lipids
														Vc3p112.1	yes	no	yes	up	normal	up	GO:0004553;GO:0005975;GO:0016020;GO:0030246;	carbohydrate							Terpenoids							Alkaloids		Vc7a91.15	up	up	down	GO:0003989;GO:0005524;GO:0006633;GO:0009507;GO:0016740;GO:0046872;GO:2001295;	Lipids
														Vc3p70.9	no	yes	yes	normal	up	down	GO:0000272;GO:0000325;GO:0000427;GO:0003677;GO:0003723;GO:0005515;GO:0005777;GO:0005829;GO:0005840;GO:0005996;GO:0006364;GO:0007623;GO:0009409;GO:0009506;GO:0009611;GO:0009658;GO:0009941;GO:0010287;GO:0010297;GO:0010319;GO:0032544;GO:0042631;GO:0045727;GO:0045893;GO:0048046;	carbohydrate							Terpenoids							Alkaloids		Vc7s397.42	up	up	normal	GO:0005504;GO:0006631;GO:0009570;GO:0009813;GO:0016872;	Lipids
														Vc3s182.47	no	no	yes	normal	normal	up	GO:0004553;GO:0005840;GO:0005975;GO:0016020;GO:0016740;	carbohydrate							Terpenoids							Alkaloids		Vc87p0.3	normal	down	up	GO:0009791;GO:0012511;GO:0016020;GO:0048608;	Lipids
														Vc3s48.39	no	yes	yes	normal	up	down	GO:0003735;GO:0004348;GO:0005840;GO:0005975;GO:0006412;GO:0006680;GO:0008422;GO:0016020;GO:1990904;	carbohydrate							Terpenoids							Alkaloids		Vc889p0.2	normal	up	down	GO:0005829;GO:0006629;GO:0006979;GO:0009408;GO:0009414;GO:0009535;GO:0009644;GO:0009737;GO:0010117;GO:0010431;GO:0031977;GO:0036094;GO:0045735;GO:0046322;GO:0052662;GO:1901562;	Lipids
														Vc3s74.40	no	no	yes	normal	normal	down	GO:0005509;GO:0005788;GO:0005789;GO:0006457;GO:0030246;GO:0030433;GO:0051082;	carbohydrate							Terpenoids							Alkaloids		Vc89a3.28	normal	normal	down	GO:0000036;GO:0006633;GO:0009507;GO:0016020;GO:0016297;	Lipids
														Vc40a1.30	no	no	yes	normal	normal	down	GO:0000325;GO:0005739;GO:0005794;GO:0006817;GO:0010030;GO:0016020;GO:0032440;GO:0034219;GO:0042593;GO:0050896;GO:0051119;	carbohydrate							Terpenoids							Alkaloids		Vc8a147.18	normal	up	normal	GO:0006629;GO:0016020;GO:0016717;GO:0045485;GO:0072330;	Lipids
														Vc40a192.14	yes	yes	yes	up	up	down	GO:0004553;GO:0005576;GO:0005975;	carbohydrate							Terpenoids							Alkaloids		Vc8a148.26	up	up	normal	GO:0004318;GO:0004319;GO:0006633;GO:0006720;GO:0016020;	Lipids
														Vc40a192.15	no	yes	no	normal	up	normal	GO:0004553;GO:0005576;GO:0005975;GO:0016020;GO:0061783;	carbohydrate							Terpenoids							Alkaloids		Vc8a164.21	normal	normal	down	GO:0003841;GO:0004623;GO:0004771;GO:0004806;GO:0005773;GO:0005777;GO:0006071;GO:0006641;GO:0012511;GO:0016020;GO:0016042;GO:0016301;GO:0016310;GO:0044248;GO:0045735;	Lipids
														Vc40a193.25	yes	yes	yes	down	up	down	GO:0004553;GO:0005576;GO:0005975;GO:0016020;GO:0061783;	carbohydrate							Terpenoids							Alkaloids		Vc8a196.32	up	up	normal	GO:0006869;GO:0008289;GO:0009826;GO:0016020;GO:0045165;GO:0090376;	Lipids
														Vc40a2.28	no	yes	no	normal	up	normal	GO:0008643;GO:0016020;	carbohydrate							Terpenoids							Alkaloids		Vc8a196.33	up	up	normal	GO:0006869;GO:0008289;GO:0009826;GO:0016020;GO:0045165;GO:0090376;	Lipids
														Vc40a210.16	no	yes	yes	normal	up	down	GO:0005524;GO:0005737;GO:0006012;GO:0016301;GO:0016773;GO:0046396;GO:0046835;GO:0046872;	carbohydrate							Terpenoids							Alkaloids		Vc8a200.13	normal	up	down	GO:0004190;GO:0006629;GO:0016020;	Lipids
														Vc40a29.23	no	no	yes	normal	normal	down	GO:0016020;GO:0030246;GO:0098609;	carbohydrate							Terpenoids							Alkaloids		Vc8a283.29	normal	down	up	GO:0000325;GO:0004497;GO:0004601;GO:0005509;GO:0005783;GO:0009269;GO:0009409;GO:0009651;GO:0009737;GO:0009751;GO:0009941;GO:0010118;GO:0012511;GO:0016020;GO:0031407;GO:0050832;GO:0098869;GO:0102070;GO:1902609;GO:1990137;GO:2000377;	Lipids
														Vc40a54.30	no	yes	yes	normal	up	down	GO:0004856;GO:0005524;GO:0005829;GO:0005997;GO:0042732;GO:0046835;GO:1990904;	carbohydrate							Terpenoids							Alkaloids		Vc8a319.23	normal	up	down	GO:0008289;GO:0016020;	Lipids
														Vc40a55.29	no	yes	yes	normal	up	down	GO:0005351;GO:0005773;GO:0005801;GO:0005886;GO:0005985;GO:0006817;GO:0008515;GO:0015770;GO:0050896;GO:0055085;	carbohydrate							Terpenoids							Alkaloids		Vc8a360.23	normal	up	down	GO:0002933;GO:0004497;GO:0005506;GO:0016020;GO:0016705;GO:0020037;GO:0048653;GO:0051792;GO:0080110;	Lipids
														Vc40a87.29	no	yes	yes	normal	up	down	GO:0003825;GO:0004805;GO:0006817;GO:0008519;GO:0015145;GO:0015293;GO:0015749;GO:0016020;GO:0032440;GO:0050896;GO:0072488;	carbohydrate							Terpenoids							Alkaloids		Vc8a361.35	normal	up	down	GO:0002933;GO:0004497;GO:0005506;GO:0016020;GO:0016705;GO:0020037;GO:0048653;GO:0051792;GO:0080110;	Lipids
														Vc40p241.22	no	yes	yes	normal	up	down	GO:0000325;GO:0005524;GO:0006811;GO:0006817;GO:0008643;GO:0016020;GO:0022857;GO:0050896;GO:0055085;	carbohydrate							Terpenoids							Alkaloids		Vc8a372.31	normal	up	down	GO:0006633;GO:0009507;GO:0009532;GO:0019904;GO:0031177;GO:0044620;GO:0140414;	Lipids
														Vc41a15.32	no	no	yes	normal	normal	down	GO:0004856;GO:0005524;GO:0005829;GO:0005997;GO:0042732;GO:0046835;GO:1990904;	carbohydrate							Terpenoids							Alkaloids		Vc8a398.26	normal	up	normal	GO:0000166;GO:0003878;GO:0005737;GO:0006085;GO:0006099;GO:0006629;GO:0016829;GO:0016874;GO:0035639;GO:0046872;GO:0072330;GO:0097367;	Lipids
														Vc41a181.26	yes	yes	yes	down	up	down	GO:0004553;GO:0005576;GO:0005975;GO:0016020;GO:0061783;	carbohydrate							Terpenoids							Alkaloids		Vc8a78.30	up	up	normal	GO:0005576;GO:0016020;GO:0016042;GO:0016788;	Lipids
														Vc41a188.22	no	yes	yes	normal	down	up	GO:0005464;GO:0005794;GO:0008643;GO:0015297;GO:0015790;GO:0016020;	carbohydrate							Terpenoids							Alkaloids		Vc8a8.25	down	down	normal	GO:0006071;GO:0006629;GO:0008081;GO:0016020;	Lipids
														Vc41a208.26	no	yes	no	normal	down	normal	GO:0006817;GO:0008643;GO:0009941;GO:0016020;GO:0022857;GO:0032440;GO:0050896;GO:0055085;	carbohydrate							Terpenoids							Alkaloids		Vc8a85.28	normal	up	down	GO:0004497;GO:0005506;GO:0006633;GO:0006952;GO:0009707;GO:0016125;GO:0016705;GO:0016829;GO:0020037;GO:0031408;GO:0033075;	Lipids
														Vc41a264.29	yes	yes	yes	up	up	down	GO:0004568;GO:0005975;GO:0006032;GO:0008061;GO:0016020;GO:0016998;GO:0050832;	carbohydrate							Terpenoids							Alkaloids		Vc8p335.15	up	up	normal	GO:0006633;GO:0009922;GO:0016020;GO:0090378;	Lipids
														Vc41a42.34	no	yes	yes	normal	up	down	GO:0016020;GO:0030246;GO:0098609;	carbohydrate							Terpenoids							Alkaloids		Vc8s354.37	normal	up	down	GO:0005737;GO:0006633;GO:0006952;GO:0010311;GO:0016702;GO:0031408;GO:0034440;GO:0043231;GO:0046872;GO:1900366;	Lipids
														Vc41p264.23	no	yes	yes	normal	up	down	GO:0004568;GO:0005975;GO:0006032;GO:0008061;GO:0016998;GO:0050832;	carbohydrate							Terpenoids							Alkaloids		Vc9a12.34	normal	up	normal	GO:0006633;GO:0009507;GO:0016740;GO:0031177;GO:0044620;GO:0140414;	Lipids
														Vc41s14.32	no	yes	yes	normal	up	down	GO:0005351;GO:0005773;GO:0005801;GO:0005886;GO:0005985;GO:0006817;GO:0008515;GO:0015770;GO:0050896;GO:0055085;	carbohydrate							Terpenoids							Alkaloids		Vc9a126.25	up	normal	up	GO:0000981;GO:0003677;GO:0005634;GO:0006357;GO:0008289;GO:0016020;	Lipids
														Vc41s205.40	no	no	yes	normal	normal	up	GO:0005457;GO:0005458;GO:0005794;GO:0006952;GO:0008643;GO:0015297;GO:0015783;GO:0016020;GO:1990570;	carbohydrate							Terpenoids							Alkaloids		Vc9a328.23	normal	up	normal	GO:0003989;GO:0006633;GO:0009317;GO:0009507;	Lipids
														Vc41s233.34	no	yes	yes	normal	up	down	GO:0003677;GO:0003899;GO:0005975;GO:0006351;GO:0006952;GO:0016020;GO:0042973;	carbohydrate							Terpenoids							Alkaloids		Vc9a334.16	up	normal	up	GO:0001067;GO:0001666;GO:0003677;GO:0003700;GO:0005634;GO:0006355;GO:0009617;GO:0009626;GO:0009644;GO:0009733;GO:0010100;GO:0010597;GO:0042761;	Lipids
														Vc42a102.21	yes	no	no	up	normal	normal	GO:0004565;GO:0005773;GO:0005975;GO:0016020;GO:0030246;	carbohydrate							Terpenoids							Alkaloids		Vc9a337.17	normal	up	down	GO:0005319;GO:0005524;GO:0006869;GO:0016020;GO:0016887;GO:0043231;GO:0055085;GO:0140359;	Lipids
														Vc42a181.27	yes	yes	yes	up	up	up	GO:0005351;GO:0006817;GO:0016020;GO:0032440;GO:0034219;GO:0050896;GO:1902600;	carbohydrate							Terpenoids							Alkaloids		Vc9a360.38	normal	down	up	GO:0004316;GO:0005739;GO:0006633;GO:0009507;GO:0016020;GO:0051287;	Lipids
														Vc42a182.30	yes	yes	no	up	up	normal	GO:0005351;GO:0006817;GO:0016020;GO:0034219;GO:1902600;	carbohydrate							Terpenoids							Alkaloids		Vc9a407.29	up	normal	normal	GO:0005737;GO:0006633;GO:0008299;GO:0009579;GO:0009694;GO:0016702;GO:0031408;GO:0034440;GO:0043231;GO:0046872;	Lipids
														Vc42a21.26	no	no	yes	normal	normal	down	GO:0004571;GO:0005509;GO:0005737;GO:0005975;GO:0012505;GO:0016020;GO:0043231;	carbohydrate							Terpenoids							Alkaloids		Vc9p352.2	normal	down	up	GO:0009791;GO:0012511;GO:0016020;GO:0019915;GO:0021700;GO:0034389;GO:0044085;GO:0048608;GO:0048609;GO:0050826;	Lipids
														Vc42a213.43	no	yes	yes	normal	up	down	GO:0004568;GO:0005576;GO:0005773;GO:0005975;GO:0006032;GO:0006952;GO:0008061;GO:0009620;GO:0016998;	carbohydrate							Terpenoids							Alkaloids		Vc9s119.32	normal	normal	down	GO:0005759;GO:0005777;GO:0006085;GO:0006633;GO:0031907;GO:0050080;GO:2001294;	Lipids
														Vc42a254.11	no	no	yes	normal	normal	down	GO:0001678;GO:0004396;GO:0005524;GO:0005536;GO:0005739;GO:0005829;GO:0006096;GO:0009507;GO:0016020;GO:0019318;GO:0046835;GO:0051156;	carbohydrate							Terpenoids							Alkaloids		Vc9s237.26	normal	normal	down	GO:0004316;GO:0006633;GO:0009507;GO:0051287;	Lipids
														Vc42a54.34	no	yes	yes	normal	up	down	GO:0005355;GO:0005459;GO:0005794;GO:0008643;GO:0015297;GO:0016020;GO:0071944;GO:0072334;	carbohydrate							Terpenoids							Alkaloids		Vc9s266.31	up	up	normal	GO:0000166;GO:0003878;GO:0005829;GO:0006099;GO:0006633;GO:0009911;GO:0010025;GO:0015995;GO:0016109;GO:0016116;GO:0016829;GO:0019252;GO:0043481;GO:0045793;GO:0045995;GO:0048366;GO:0140615;	Lipids
														Vc42s182.32	yes	yes	yes	down	up	down	GO:0005351;GO:0006817;GO:0016020;GO:0032440;GO:0034219;GO:0050896;GO:1902600;	carbohydrate							Terpenoids							Alkaloids		Vc9s3.42	up	up	normal	GO:0000166;GO:0003878;GO:0005737;GO:0006085;GO:0006099;GO:0006629;GO:0016829;GO:0016874;GO:0035639;GO:0046872;GO:0072330;GO:0097367;	Lipids
														Vc42s184.36	no	yes	yes	normal	up	down	GO:0003676;GO:0004523;GO:0005975;GO:0006952;GO:0016020;GO:0016301;GO:0016310;GO:0042973;	carbohydrate							Terpenoids							Alkaloids		Vc9s393.36	normal	up	down	GO:0000981;GO:0003677;GO:0003723;GO:0005634;GO:0006357;GO:0008289;	Lipids
														Vc42s241.40	no	yes	yes	normal	up	down	GO:0004565;GO:0005773;GO:0005975;GO:0030246;	carbohydrate							Terpenoids							Alkaloids							Lipids
														Vc43a116.33	yes	yes	no	up	up	normal	GO:0004553;GO:0005975;GO:0016020;	carbohydrate							Terpenoids							Alkaloids							Lipids
														Vc43a124.32	no	yes	yes	normal	down	up	GO:0004565;GO:0005773;GO:0005975;GO:0016020;GO:0030246;	carbohydrate							Terpenoids							Alkaloids							Lipids
														Vc43a18.28	yes	no	yes	down	normal	down	GO:0000325;GO:0005515;GO:0005829;GO:0006817;GO:0006829;GO:0016020;GO:0034219;GO:0050896;GO:0051119;	carbohydrate							Terpenoids							Alkaloids							Lipids
														Vc43a258.27	no	no	yes	normal	normal	down	GO:0004650;GO:0004864;GO:0005737;GO:0005886;GO:0005975;GO:0009738;GO:0016829;GO:0047911;	carbohydrate							Terpenoids							Alkaloids							Lipids
														Vc43a7.29	no	yes	no	normal	down	normal	GO:0004650;GO:0005975;GO:0016020;GO:0016829;	carbohydrate							Terpenoids							Alkaloids							Lipids
														Vc43a98.22	no	yes	yes	normal	up	down	GO:0005576;GO:0005829;GO:0005975;GO:0008422;GO:0009057;GO:0102483;	carbohydrate							Terpenoids							Alkaloids							Lipids
														Vc43p235.9	no	no	yes	normal	normal	down	GO:0003746;GO:0005794;GO:0006414;GO:0008643;GO:0015297;GO:0016020;GO:0055085;	carbohydrate							Terpenoids							Alkaloids							Lipids
														Vc43s263.34	no	yes	no	normal	down	normal	GO:0016020;GO:0034219;GO:0051119;	carbohydrate							Terpenoids							Alkaloids							Lipids
														Vc43s8.49	yes	yes	no	up	up	normal	GO:0004650;GO:0005524;GO:0005525;GO:0005975;GO:0008728;GO:0008893;GO:0009507;GO:0009611;GO:0010150;GO:0015969;GO:0015979;GO:0016301;GO:0016310;	carbohydrate							Terpenoids							Alkaloids							Lipids
														Vc44a16.23	yes	yes	no	up	up	normal	GO:0004650;GO:0004864;GO:0005737;GO:0005886;GO:0005975;GO:0009738;GO:0016829;GO:0047911;	carbohydrate							Terpenoids							Alkaloids							Lipids
														Vc44a24.31	yes	yes	no	up	up	normal	GO:0004674;GO:0005524;GO:0016020;GO:0016310;GO:0030246;GO:0048544;GO:0051707;GO:0106310;	carbohydrate							Terpenoids							Alkaloids							Lipids
														Vc44s15.43	yes	no	yes	up	normal	up	GO:0005576;GO:0008810;GO:0016020;GO:0030245;GO:0030246;	carbohydrate							Terpenoids							Alkaloids							Lipids
														Vc45a102.32	no	yes	yes	normal	up	down	GO:0003735;GO:0004348;GO:0005840;GO:0005975;GO:0006412;GO:0006680;GO:0008422;GO:0016020;GO:1990904;	carbohydrate							Terpenoids							Alkaloids							Lipids
														Vc45a134.28	no	yes	yes	normal	up	down	GO:0004427;GO:0005509;GO:0005783;GO:0006457;GO:0009678;GO:0016020;GO:0016491;GO:0030246;GO:0051082;GO:1902600;	carbohydrate							Terpenoids							Alkaloids							Lipids
														Vc45a205.28	no	yes	yes	normal	up	down	GO:0005975;GO:0008422;GO:0009507;GO:0102726;	carbohydrate							Terpenoids							Alkaloids							Lipids
														Vc45a24.22	no	no	yes	normal	normal	down	GO:0003676;GO:0005634;GO:0005829;GO:0005886;GO:0006979;GO:0008865;GO:0009408;GO:0009409;GO:0009506;GO:0016787;GO:0034337;GO:0046835;GO:0061077;	carbohydrate							Terpenoids							Alkaloids							Lipids
														Vc45a64.27	no	yes	yes	normal	up	down	GO:0004553;GO:0005634;GO:0005975;GO:0006397;GO:0006605;GO:0016020;GO:0017018;	carbohydrate							Terpenoids							Alkaloids							Lipids
														Vc45p134.7	no	no	yes	normal	normal	down	GO:0003924;GO:0005509;GO:0005525;GO:0005788;GO:0005789;GO:0006457;GO:0030246;GO:0030433;GO:0051082;	carbohydrate							Terpenoids							Alkaloids							Lipids
														Vc46a100.23	yes	yes	no	up	up	normal	GO:0004553;GO:0005975;	carbohydrate							Terpenoids							Alkaloids							Lipids
														Vc46a124.34	yes	yes	no	up	up	normal	GO:0004553;GO:0005975;GO:0016020;	carbohydrate							Terpenoids							Alkaloids							Lipids
														Vc46a200.26	no	yes	no	normal	up	normal	GO:0008643;GO:0016020;GO:0051119;GO:0055085;	carbohydrate							Terpenoids							Alkaloids							Lipids
														Vc46a202.32	no	yes	yes	normal	down	up	GO:0004650;GO:0005975;GO:0016020;GO:0016829;	carbohydrate							Terpenoids							Alkaloids							Lipids
														Vc46a95.26	no	yes	yes	normal	down	up	GO:0004565;GO:0005773;GO:0005975;GO:0016020;GO:0030246;	carbohydrate							Terpenoids							Alkaloids							Lipids
														Vc46p12.16	no	yes	yes	normal	up	down	GO:0005794;GO:0008643;GO:0015297;GO:0016020;GO:0055085;	carbohydrate							Terpenoids							Alkaloids							Lipids
														Vc46s199.48	no	yes	yes	normal	up	down	GO:0004553;GO:0005975;GO:0016020;	carbohydrate							Terpenoids							Alkaloids							Lipids
														Vc47a180.36	no	yes	yes	normal	up	down	GO:0000325;GO:0005515;GO:0005829;GO:0006817;GO:0006829;GO:0016020;GO:0034219;GO:0050896;GO:0051119;	carbohydrate							Terpenoids							Alkaloids							Lipids
														Vc47a187.41	yes	no	yes	down	normal	down	GO:0004553;GO:0005975;GO:0016020;	carbohydrate							Terpenoids							Alkaloids							Lipids
														Vc47a77.31	no	yes	yes	normal	down	up	GO:0004565;GO:0005773;GO:0005975;GO:0016020;GO:0030246;	carbohydrate							Terpenoids							Alkaloids							Lipids
														Vc47p187.14	no	yes	no	normal	up	normal	GO:0004553;GO:0005773;GO:0005975;GO:0009507;	carbohydrate							Terpenoids							Alkaloids							Lipids
														Vc47p89.9	yes	yes	no	up	up	normal	GO:0004553;GO:0005975;GO:0016020;	carbohydrate							Terpenoids							Alkaloids							Lipids
														Vc48a103.35	no	yes	yes	normal	up	down	GO:0005794;GO:0005886;GO:0006817;GO:0008643;GO:0015098;GO:0015689;GO:0050896;	carbohydrate							Terpenoids							Alkaloids							Lipids
														Vc48a103.40	yes	no	yes	up	normal	up	GO:0000773;GO:0002229;GO:0004608;GO:0005777;GO:0005789;GO:0005829;GO:0005975;GO:0006098;GO:0006656;GO:0009507;GO:0016853;GO:0017057;GO:0032259;GO:0042128;GO:0042742;GO:0071461;GO:0080101;	carbohydrate							Terpenoids							Alkaloids							Lipids
														Vc48a26.22	no	no	yes	normal	normal	down	GO:0005975;GO:0016853;GO:0097367;GO:1901135;	carbohydrate							Terpenoids							Alkaloids							Lipids
														Vc48a83.37	no	no	yes	normal	normal	down	GO:0005975;GO:0015925;GO:0016020;	carbohydrate							Terpenoids							Alkaloids							Lipids
														Vc48p89.5	yes	yes	yes	down	up	down	GO:0004553;GO:0005507;GO:0005975;GO:0016491;	carbohydrate							Terpenoids							Alkaloids							Lipids
														Vc49a28.31	yes	yes	no	up	up	normal	GO:0004650;GO:0004864;GO:0005737;GO:0005886;GO:0005975;GO:0009738;GO:0016829;GO:0047911;	carbohydrate							Terpenoids							Alkaloids							Lipids
														Vc4a11.38	yes	yes	yes	up	up	down	GO:0000166;GO:0003878;GO:0005737;GO:0006085;GO:0006099;GO:0006629;GO:0016829;GO:0016874;GO:0035639;GO:0046872;GO:0072330;GO:0097367;	carbohydrate							Terpenoids							Alkaloids							Lipids
														Vc4a167.27	no	yes	yes	normal	down	up	GO:0005576;GO:0005975;GO:0006952;GO:0016020;GO:0016740;GO:0042973;GO:0071944;	carbohydrate							Terpenoids							Alkaloids							Lipids
														Vc4a183.21	no	yes	yes	normal	down	up	GO:0009507;GO:0016020;GO:0030246;GO:1990904;	carbohydrate							Terpenoids							Alkaloids							Lipids
														Vc4a3.28	yes	yes	no	up	up	normal	GO:0000166;GO:0003878;GO:0005737;GO:0006085;GO:0006099;GO:0006629;GO:0016829;GO:0016874;GO:0035639;GO:0046872;GO:0072330;GO:0097367;	carbohydrate							Terpenoids							Alkaloids							Lipids
														Vc4a323.21	no	no	yes	normal	normal	down	GO:0004553;GO:0005773;GO:0005975;GO:0016020;	carbohydrate							Terpenoids							Alkaloids							Lipids
														Vc4a364.34	no	no	yes	normal	normal	down	GO:0000139;GO:0006486;GO:0008194;GO:0008378;GO:0010405;GO:0018208;GO:0030246;GO:0048354;GO:0140103;GO:1900056;	carbohydrate							Terpenoids							Alkaloids							Lipids
														Vc4p106.15	no	yes	yes	normal	down	up	GO:0000347;GO:0000727;GO:0000785;GO:0003677;GO:0004386;GO:0005509;GO:0005524;GO:0005783;GO:0006270;GO:0006457;GO:0008094;GO:0009536;GO:0009793;GO:0010082;GO:0016020;GO:0016887;GO:0030246;GO:0032508;GO:0042127;GO:0042555;GO:0051082;GO:1902969;	carbohydrate							Terpenoids							Alkaloids							Lipids
														Vc4p236.4	no	yes	yes	normal	up	down	GO:0016301;GO:0016310;GO:0030246;	carbohydrate							Terpenoids							Alkaloids							Lipids
														Vc4p32.6	yes	yes	yes	up	up	down	GO:0000166;GO:0003878;GO:0005737;GO:0006085;GO:0006099;GO:0006629;GO:0016829;GO:0016874;GO:0035639;GO:0046872;GO:0072330;GO:0097367;	carbohydrate							Terpenoids							Alkaloids							Lipids
														Vc4s297.30	yes	yes	no	up	up	normal	GO:0000166;GO:0003878;GO:0005829;GO:0006099;GO:0006633;GO:0009911;GO:0010025;GO:0015995;GO:0016109;GO:0016116;GO:0016829;GO:0019252;GO:0035639;GO:0043481;GO:0045793;GO:0045995;GO:0048366;GO:0097367;GO:0140615;	carbohydrate							Terpenoids							Alkaloids							Lipids
														Vc4s418.48	yes	no	yes	down	normal	down	GO:0030246;GO:2000028;	carbohydrate							Terpenoids							Alkaloids							Lipids
														Vc50a20.17	no	yes	no	normal	up	normal	GO:0004601;GO:0005509;GO:0007231;GO:0009408;GO:0009611;GO:0016020;GO:0033500;GO:0043069;GO:0050664;GO:0050832;GO:0071944;GO:0072593;GO:0098869;	carbohydrate							Terpenoids							Alkaloids							Lipids
														Vc50s27.35	no	yes	yes	normal	up	down	GO:0002237;GO:0004370;GO:0005524;GO:0005739;GO:0005829;GO:0006071;GO:0006072;GO:0006641;GO:0010188;GO:0016310;GO:0019405;GO:0042742;GO:0090407;GO:1901137;	carbohydrate							Terpenoids							Alkaloids							Lipids
														Vc51a20.30	no	yes	yes	normal	down	up	GO:0004560;GO:0005975;GO:0016020;	carbohydrate							Terpenoids							Alkaloids							Lipids
														Vc51a4.27	no	yes	yes	normal	down	up	GO:0000502;GO:0005975;GO:0016787;GO:0047268;GO:0047274;	carbohydrate							Terpenoids							Alkaloids							Lipids
														Vc52p4.0	no	yes	no	normal	down	normal	GO:0005975;GO:0031179;	carbohydrate							Terpenoids							Alkaloids							Lipids
														Vc530p0.4	no	no	yes	normal	normal	down	GO:0005739;GO:0005829;GO:0006793;GO:0008242;GO:0008460;GO:0009225;GO:0009506;GO:0010280;GO:0010315;GO:0016491;GO:0016853;GO:0030154;GO:0034654;GO:0042127;GO:0050377;GO:0051555;GO:0071555;GO:1901137;	carbohydrate							Terpenoids							Alkaloids							Lipids
														Vc53a15.50	no	yes	yes	normal	up	down	GO:0004568;GO:0005975;GO:0006032;GO:0008061;GO:0016020;GO:0016998;GO:0050832;	carbohydrate							Terpenoids							Alkaloids							Lipids
														Vc53a15.52	yes	yes	yes	up	up	down	GO:0004568;GO:0005576;GO:0005975;GO:0006032;GO:0006952;GO:0008061;GO:0009620;GO:0016998;	carbohydrate							Terpenoids							Alkaloids							Lipids
														Vc55a10.22	yes	yes	yes	down	up	down	GO:0008661;GO:0009228;GO:0016020;GO:0016114;GO:0046872;GO:0052863;GO:0090407;GO:1901137;	carbohydrate							Terpenoids							Alkaloids							Lipids
														Vc56p7.13	no	yes	yes	normal	up	down	GO:0008661;GO:0009228;GO:0016020;GO:0016114;GO:0046872;GO:0052863;GO:0090407;GO:1901137;	carbohydrate							Terpenoids							Alkaloids							Lipids
														Vc5a142.41	yes	no	yes	up	normal	up	GO:0008643;GO:0016301;GO:0016310;GO:0031969;GO:0099402;	carbohydrate							Terpenoids							Alkaloids							Lipids
														Vc5a273.13	no	yes	yes	normal	up	down	GO:0005975;GO:0046872;GO:0047274;GO:0052692;	carbohydrate							Terpenoids							Alkaloids							Lipids
														Vc5a275.27	no	no	yes	normal	normal	up	GO:0005975;GO:0008184;	carbohydrate							Terpenoids							Alkaloids							Lipids
														Vc5a372.25	no	yes	yes	normal	up	down	GO:0004672;GO:0005524;GO:0016020;GO:0016310;GO:0030246;GO:0048544;GO:0071944;	carbohydrate							Terpenoids							Alkaloids							Lipids
														Vc5a56.26	yes	yes	no	up	up	normal	GO:0003825;GO:0004805;GO:0006817;GO:0008519;GO:0009055;GO:0009414;GO:0009651;GO:0009737;GO:0015078;GO:0015145;GO:0015293;GO:0015749;GO:0016020;GO:0022853;GO:0022900;GO:0071944;GO:0072488;	carbohydrate							Terpenoids							Alkaloids							Lipids
														Vc5p322.8	no	yes	yes	normal	down	up	GO:0005886;GO:0005975;GO:0009787;GO:0010231;GO:0010427;GO:0016798;GO:0031179;	carbohydrate							Terpenoids							Alkaloids							Lipids
														Vc5s10.54	no	no	yes	normal	normal	down	GO:0005794;GO:0005975;GO:0009059;GO:0009834;GO:0016020;GO:0016740;GO:0043412;GO:0044036;GO:0046872;	carbohydrate							Terpenoids							Alkaloids							Lipids
														Vc5s373.33	yes	no	yes	down	normal	down	GO:0006793;GO:0008460;GO:0009225;GO:0010280;GO:0010315;GO:0016020;GO:0034654;GO:0050377;GO:0051555;GO:1901137;	carbohydrate							Terpenoids							Alkaloids							Lipids
														Vc613p0.1	yes	no	yes	down	normal	down	GO:0005351;GO:0005773;GO:0005886;GO:0005985;GO:0006817;GO:0008515;GO:0015770;GO:0055085;	carbohydrate							Terpenoids							Alkaloids							Lipids
														Vc61a7.13	yes	no	yes	down	normal	down	GO:0008661;GO:0009228;GO:0016020;GO:0016114;GO:0046872;GO:0052863;GO:0090407;GO:1901137;	carbohydrate							Terpenoids							Alkaloids							Lipids
														Vc65a5.29	no	no	yes	normal	normal	down	GO:0005768;GO:0005794;GO:0008643;GO:0015297;GO:0016020;GO:0031984;GO:0055085;GO:0071944;	carbohydrate							Terpenoids							Alkaloids							Lipids
														Vc6a389.35	yes	yes	no	up	up	normal	GO:0004553;GO:0005576;GO:0005975;GO:0006032;GO:0008061;	carbohydrate							Terpenoids							Alkaloids							Lipids
														Vc6a389.36	no	yes	no	normal	up	normal	GO:0005576;GO:0005975;GO:0006032;GO:0008061;GO:0016020;GO:0016798;	carbohydrate							Terpenoids							Alkaloids							Lipids
														Vc6a62.24	no	no	yes	normal	normal	down	GO:0016301;GO:0016310;GO:0030246;	carbohydrate							Terpenoids							Alkaloids							Lipids
														Vc6p193.11	yes	no	yes	down	normal	down	GO:0005351;GO:0005773;GO:0005886;GO:0005985;GO:0006817;GO:0008515;GO:0015770;GO:0055085;	carbohydrate							Terpenoids							Alkaloids							Lipids
														Vc6p389.31	no	yes	yes	normal	up	down	GO:0005975;GO:0008061;GO:0016787;	carbohydrate							Terpenoids							Alkaloids							Lipids
														Vc6p389.6	yes	yes	no	up	up	normal	GO:0004553;GO:0005576;GO:0005975;GO:0006032;GO:0008061;GO:0016020;	carbohydrate							Terpenoids							Alkaloids							Lipids
														Vc6s273.26	no	yes	yes	normal	up	down	GO:0005975;GO:0016020;	carbohydrate							Terpenoids							Alkaloids							Lipids
														Vc6s286.38	no	yes	yes	normal	down	up	GO:0004565;GO:0005773;GO:0005975;GO:0016020;GO:0030246;GO:0048046;	carbohydrate							Terpenoids							Alkaloids							Lipids
														Vc6s287.26	no	yes	yes	normal	up	down	GO:0004553;GO:0005783;GO:0005975;GO:0006491;GO:0006952;GO:0009057;GO:0016020;GO:0030246;	carbohydrate							Terpenoids							Alkaloids							Lipids
														Vc6s295.42	no	yes	yes	normal	down	up	GO:0004650;GO:0005829;GO:0005975;GO:0016020;GO:0016829;GO:0047911;	carbohydrate							Terpenoids							Alkaloids							Lipids
														Vc6s313.31	no	yes	yes	normal	up	down	GO:0003755;GO:0004801;GO:0005737;GO:0005975;GO:0006098;GO:0009749;GO:0009809;GO:0043231;	carbohydrate							Terpenoids							Alkaloids							Lipids
														Vc6s374.24	no	yes	yes	normal	up	down	GO:0004557;GO:0005975;GO:0016020;GO:0047268;GO:0047274;	carbohydrate							Terpenoids							Alkaloids							Lipids
														Vc6s420.50	no	no	yes	normal	normal	down	GO:0005737;GO:0005886;GO:0005975;GO:0016301;GO:0016310;GO:0016773;GO:0043231;GO:0044281;	carbohydrate							Terpenoids							Alkaloids							Lipids
														Vc70s2.31	no	yes	yes	normal	up	down	GO:0008661;GO:0009228;GO:0016020;GO:0016114;GO:0046872;GO:0052863;GO:0090407;GO:1901137;	carbohydrate							Terpenoids							Alkaloids							Lipids
														Vc7a100.29	no	yes	no	normal	up	normal	GO:0005886;GO:0034219;GO:0051119;	carbohydrate							Terpenoids							Alkaloids							Lipids
														Vc7a35.29	yes	no	no	down	normal	normal	GO:0005975;GO:0016020;GO:0042973;	carbohydrate							Terpenoids							Alkaloids							Lipids
														Vc7a407.28	no	yes	yes	normal	up	down	GO:0005829;GO:0005975;GO:0006098;GO:0016020;GO:0016857;GO:0044282;GO:0046872;GO:1901575;	carbohydrate							Terpenoids							Alkaloids							Lipids
														Vc7a7.36	no	yes	yes	normal	up	down	GO:0000325;GO:0006817;GO:0008643;GO:0009409;GO:0009414;GO:0009744;GO:0009749;GO:0009750;GO:0016020;GO:0019900;GO:0022857;GO:0032440;GO:0055085;	carbohydrate							Terpenoids							Alkaloids							Lipids
														Vc7p145.8	yes	yes	no	up	up	normal	GO:0004672;GO:0005524;GO:0016020;GO:0030246;GO:0046872;	carbohydrate							Terpenoids							Alkaloids							Lipids
														Vc7p394.1	yes	yes	yes	up	up	down	GO:0005975;GO:0047274;	carbohydrate							Terpenoids							Alkaloids							Lipids
														Vc7p401.11	yes	yes	no	up	up	normal	GO:0005829;GO:0005975;GO:0006116;GO:0009331;GO:0042803;GO:0046168;GO:0047952;GO:0051287;	carbohydrate							Terpenoids							Alkaloids							Lipids
														Vc7s188.32	no	yes	yes	normal	down	up	GO:0006817;GO:0015293;GO:0016020;GO:0032440;GO:0034219;GO:0050896;GO:0051119;	carbohydrate							Terpenoids							Alkaloids							Lipids
														Vc7s188.35	no	yes	no	normal	up	normal	GO:0006817;GO:0015293;GO:0016020;GO:0032440;GO:0034219;GO:0051119;	carbohydrate							Terpenoids							Alkaloids							Lipids
														Vc80p5.6	no	yes	yes	normal	up	down	GO:0005975;GO:0006952;GO:0016020;GO:0016301;GO:0016310;GO:0042973;	carbohydrate							Terpenoids							Alkaloids							Lipids
														Vc847a0.8	no	yes	yes	normal	down	up	GO:0004476;GO:0005829;GO:0005975;GO:0008270;GO:0009298;GO:0009646;GO:0009744;GO:0010043;GO:0033591;GO:0042364;GO:0046394;GO:0046680;GO:0046686;GO:1901336;	carbohydrate							Terpenoids							Alkaloids							Lipids
														Vc896a0.12	no	no	yes	normal	normal	down	GO:0016301;GO:0016310;GO:0030246;	carbohydrate							Terpenoids							Alkaloids							Lipids
														Vc89s4.43	no	yes	yes	normal	down	up	GO:0005634;GO:0005759;GO:0005975;GO:0016020;GO:0030488;GO:0042973;GO:0052906;	carbohydrate							Terpenoids							Alkaloids							Lipids
														Vc8a20.30	no	no	yes	normal	normal	down	GO:0000325;GO:0006817;GO:0008643;GO:0016020;GO:0022857;GO:0042631;GO:0055085;	carbohydrate							Terpenoids							Alkaloids							Lipids
														Vc8a22.29	yes	yes	no	up	up	normal	GO:0003955;GO:0004674;GO:0005524;GO:0010181;GO:0016020;GO:0016310;GO:0030246;GO:0046872;GO:0046983;GO:0048544;GO:0051536;GO:0051707;GO:0071944;GO:0106310;	carbohydrate							Terpenoids							Alkaloids							Lipids
														Vc8a31.24	no	yes	no	normal	down	normal	GO:0005886;GO:0005975;GO:0009787;GO:0010231;GO:0010427;GO:0016630;GO:0031179;	carbohydrate							Terpenoids							Alkaloids							Lipids
														Vc8a353.26	yes	yes	no	up	up	normal	GO:0003825;GO:0004805;GO:0006817;GO:0008519;GO:0009055;GO:0009414;GO:0009651;GO:0009737;GO:0015078;GO:0015145;GO:0015293;GO:0015749;GO:0016020;GO:0022853;GO:0022900;GO:0071944;GO:0072488;	carbohydrate							Terpenoids							Alkaloids							Lipids
														Vc8a61.33	no	yes	yes	normal	down	up	GO:0000160;GO:0004673;GO:0004721;GO:0007231;GO:0008272;GO:0009414;GO:0009736;GO:0009884;GO:0010029;GO:0016020;GO:0016036;GO:0016310;GO:0019199;GO:0032501;GO:0033500;GO:0042742;GO:0043424;GO:0046872;GO:0048509;GO:0048831;GO:0048856;GO:0071329;GO:0140299;	carbohydrate							Terpenoids							Alkaloids							Lipids
														Vc8s111.36	no	yes	yes	normal	down	up	GO:0005886;GO:0005975;GO:0009653;GO:0016798;GO:0031179;	carbohydrate							Terpenoids							Alkaloids							Lipids
														Vc8s21.19	no	no	yes	normal	normal	down	GO:0004553;GO:0005975;	carbohydrate							Terpenoids							Alkaloids							Lipids
														Vc8s404.41	no	yes	yes	normal	up	down	GO:0005794;GO:0005975;GO:0009059;GO:0009834;GO:0016020;GO:0016740;GO:0043412;GO:0044036;GO:0046872;	carbohydrate							Terpenoids							Alkaloids							Lipids
														Vc93a2.33	no	yes	yes	normal	up	down	GO:0005975;GO:0006952;GO:0016020;GO:0042973;	carbohydrate							Terpenoids							Alkaloids							Lipids
														Vc95s4.47	no	no	yes	normal	normal	up	GO:0005975;GO:0009536;GO:0019156;GO:0043033;GO:0043170;GO:0044249;GO:1901137;GO:1901575;	carbohydrate							Terpenoids							Alkaloids							Lipids
														Vc964a0.6	no	yes	yes	normal	up	down	GO:0005315;GO:0005777;GO:0005794;GO:0007033;GO:0008643;GO:0009553;GO:0009793;GO:0010152;GO:0015120;GO:0015297;GO:0015605;GO:0015713;GO:0015748;GO:0019904;GO:0031969;GO:0034389;GO:0051301;GO:1901264;GO:1901505;	carbohydrate							Terpenoids							Alkaloids							Lipids
														Vc9a120.25	no	no	yes	normal	normal	down	GO:0004462;GO:0005737;GO:0005975;GO:0019243;GO:0046872;	carbohydrate							Terpenoids							Alkaloids							Lipids
														Vc9a138.29	yes	yes	no	up	up	normal	GO:0004674;GO:0005524;GO:0016020;GO:0016310;GO:0030246;GO:0048544;GO:0071944;GO:0106310;	carbohydrate							Terpenoids							Alkaloids							Lipids
														Vc9a138.30	no	yes	yes	normal	down	up	GO:0009507;GO:0016020;GO:0030246;GO:1990904;	carbohydrate							Terpenoids							Alkaloids							Lipids
														Vc9a341.19	no	no	yes	normal	normal	down	GO:0000139;GO:0006486;GO:0008194;GO:0008378;GO:0010405;GO:0018208;GO:0030246;GO:0048354;GO:0140103;GO:1900056;	carbohydrate							Terpenoids							Alkaloids							Lipids
														Vc9a65.40	no	yes	yes	normal	down	up	GO:0000347;GO:0000727;GO:0003677;GO:0004386;GO:0005509;GO:0005524;GO:0005783;GO:0006270;GO:0006457;GO:0008094;GO:0009536;GO:0016020;GO:0016887;GO:0030246;GO:0032508;GO:0042555;GO:0051082;GO:1902969;	carbohydrate							Terpenoids							Alkaloids							Lipids
														Vc9a90.20	no	yes	yes	normal	up	down	GO:0004568;GO:0005576;GO:0005794;GO:0005975;GO:0006032;GO:0006952;GO:0008061;GO:0009059;GO:0009408;GO:0009414;GO:0009651;GO:0009735;GO:0009825;GO:0010053;GO:0010167;GO:0010337;GO:0016020;GO:0016688;GO:0016998;GO:0030247;GO:0090379;GO:0098869;	carbohydrate							Terpenoids							Alkaloids							Lipids
														Vc9p125.2	no	yes	yes	normal	up	down	GO:0004553;GO:0005975;	carbohydrate							Terpenoids							Alkaloids							Lipids
														Vc9s291.33	no	no	yes	normal	normal	down	GO:0004556;GO:0005509;GO:0005975;GO:0009057;GO:0009507;GO:0009532;GO:0016020;GO:0022857;GO:0055085;	carbohydrate							Terpenoids							Alkaloids							Lipids
														Vc9s3.42	yes	yes	no	up	up	normal	GO:0000166;GO:0003878;GO:0005737;GO:0006085;GO:0006099;GO:0006629;GO:0016829;GO:0016874;GO:0035639;GO:0046872;GO:0072330;GO:0097367;	carbohydrate							Terpenoids							Alkaloids							Lipids
														Vc9s80.42	no	yes	yes	normal	up	down	GO:0004674;GO:0005524;GO:0005886;GO:0016310;GO:0030246;GO:0050832;	carbohydrate							Terpenoids							Alkaloids							Lipids
