# Supplementary material for: Integrated Untargeted Metabolome, Full-Length Sequencing and Transcriptome Analyses Reveal the Mechanism of Flavonoid Biosynthesis in Blueberry (Vaccinium spp.) Fruit
Source: Int J Mol Sci. 2024 Apr 9;25(8):4137. doi: 10.3390/ijms25084137 (PMC11050320; doi:10.3390/ijms25084137)
Supplement: Supplementary file 1 [file ijms-25-04137-s001.zip › Table S6. KEGG enrichment analysis results of DEGs.xlsx]

## Sheet: Table S6
Table S6. KEGG enrichment analysis results of DEGs
rank	id	num	qvalue	per	ratio	class	ID	Descrption	KEGG_A_class	KEGG_B_class	Pvalue	Qvalue	Up	Down	fg_num	bg_num			rank	id	num	qvalue	per	ratio	class	ID	Descrption	KEGG_A_class	KEGG_B_class	Pvalue	Qvalue	Up	Down	fg_num	bg_num			rank	id	num	qvalue	per	ratio	class	ID	Descrption	KEGG_A_class	KEGG_B_class	Pvalue
1	Biosynthesis of secondary metabolites	325	1.27792e-42	47.584	0.12	Metabolism	ko01110	Biosynthesis of secondary metabolites	Metabolism	Global and overview maps	1.10165e-44	1.27792e-42	284	41	325	2714	Ex vs Sa		1	Metabolic pathways	1682	2.58682e-83	58.75	0.343	Metabolism	ko01100	Metabolic pathways	Metabolism	Global and overview maps	1.88819e-85	2.58682e-83	1346	336	1682	4907	Ex vs Se		1	Metabolic pathways	1772	2.94173e-62	55.671	0.361	Metabolism	ko01100	Metabolic pathways	Metabolism	Global and overview maps	2.14725e-64
2	Flavonoid biosynthesis	53	2.11435e-38	7.76	0.558	Metabolism	ko00941	Flavonoid biosynthesis	Metabolism	Biosynthesis of other secondary metabolites	3.64543e-40	2.11435e-38	52	1	53	95	Ex vs Sa		2	Biosynthesis of secondary metabolites	1017	8.07824e-60	35.522	0.375	Metabolism	ko01110	Biosynthesis of secondary metabolites	Metabolism	Global and overview maps	1.17931e-61	8.07824e-60	805	212	1017	2714	Ex vs Se		2	Biosynthesis of secondary metabolites	993	3.47086e-28	31.197	0.366	Metabolism	ko01110	Biosynthesis of secondary metabolites	Metabolism	Global and overview maps	5.06695e-30
3	Phenylpropanoid biosynthesis	68	7.06371e-35	9.956	0.368	Metabolism	ko00940	Phenylpropanoid biosynthesis	Metabolism	Biosynthesis of other secondary metabolites	1.82682e-36	7.06371e-35	63	5	68	185	Ex vs Sa		3	Phenylpropanoid biosynthesis	122	2.14478e-30	4.261	0.659	Metabolism	ko00940	Phenylpropanoid biosynthesis	Metabolism	Biosynthesis of other secondary metabolites	4.69661e-32	2.14478e-30	107	15	122	185	Ex vs Se		3	Oxidative phosphorylation	152	8.16512e-15	4.775	0.498	Metabolism	ko00190	Oxidative phosphorylation	Metabolism	Energy metabolism	1.78798e-16
4	Metabolic pathways	430	7.6666e-26	62.958	0.088	Metabolism	ko01100	Metabolic pathways	Metabolism	Global and overview maps	2.64366e-27	7.6666e-26	352	78	430	4907	Ex vs Sa		4	Flavonoid biosynthesis	78	5.25766e-30	2.724	0.821	Metabolism	ko00941	Flavonoid biosynthesis	Metabolism	Biosynthesis of other secondary metabolites	1.53508e-31	5.25766e-30	71	7	78	95	Ex vs Se		4	Pentose and glucuronate interconversions	66	1.45725e-13	2.074	0.653	Metabolism	ko00040	Pentose and glucuronate interconversions	Metabolism	Carbohydrate metabolism	4.25474e-15
5	Fatty acid elongation	33	1.01121e-21	4.832	0.493	Metabolism	ko00062	Fatty acid elongation	Metabolism	Lipid metabolism	4.35866e-23	1.01121e-21	33	0	33	67	Ex vs Sa		5	Plant-pathogen interaction	216	1.92953e-13	7.545	0.399	Organismal Systems	ko04626	Plant-pathogen interaction	Organismal Systems	Environmental adaptation	7.04208e-15	1.92953e-13	171	45	216	542	Ex vs Se		5	Amino sugar and nucleotide sugar metabolism	129	6.42521e-10	4.053	0.464	Metabolism	ko00520	Amino sugar and nucleotide sugar metabolism	Metabolism	Carbohydrate metabolism	2.34497e-11
6	ABC transporters	42	6.02005e-21	6.149	0.356	Environmental Information Processing	ko02010	ABC transporters	Environmental Information Processing	Membrane transport	3.11382e-22	6.02005e-21	36	6	42	118	Ex vs Sa		6	Stilbenoid, diarylheptanoid and gingerol biosynthesis	29	2.4905e-11	1.013	0.829	Metabolism	ko00945	Stilbenoid, diarylheptanoid and gingerol biosynthesis	Metabolism	Biosynthesis of other secondary metabolites	1.09073e-12	2.4905e-11	24	5	29	35	Ex vs Se		6	Zeatin biosynthesis	31	6.81996e-10	0.974	0.795	Metabolism	ko00908	Zeatin biosynthesis	Metabolism	Metabolism of terpenoids and polyketides	2.98684e-11
7	Flavone and flavonol biosynthesis	12	2.59045e-09	1.757	0.6	Metabolism	ko00944	Flavone and flavonol biosynthesis	Metabolism	Biosynthesis of other secondary metabolites	1.5632e-10	2.59045e-09	12	0	12	20	Ex vs Sa		7	Pentose and glucuronate interconversions	58	8.13326e-11	2.026	0.574	Metabolism	ko00040	Pentose and glucuronate interconversions	Metabolism	Carbohydrate metabolism	4.15568e-12	8.13326e-11	47	11	58	101	Ex vs Se		7	Glyoxylate and dicarboxylate metabolism	93	9.96597e-10	2.922	0.505	Metabolism	ko00630	Glyoxylate and dicarboxylate metabolism	Metabolism	Carbohydrate metabolism	5.0921e-11
8	Phenylalanine metabolism	27	3.44897e-09	3.953	0.243	Metabolism	ko00360	Phenylalanine metabolism	Metabolism	Amino acid metabolism	2.3786e-10	3.44897e-09	23	4	27	111	Ex vs Sa		8	Carbon fixation in photosynthetic organisms	87	2.63056e-10	3.039	0.481	Metabolism	ko00710	Carbon fixation in photosynthetic organisms	Metabolism	Energy metabolism	1.53609e-11	2.63056e-10	64	23	87	181	Ex vs Se		8	Carbon metabolism	262	3.45997e-09	8.231	0.388	Metabolism	ko01200	Carbon metabolism	Metabolism	Global and overview maps	2.02042e-10
9	Stilbenoid, diarylheptanoid and gingerol biosynthesis	15	5.3392e-09	2.196	0.429	Metabolism	ko00945	Stilbenoid, diarylheptanoid and gingerol biosynthesis	Metabolism	Biosynthesis of other secondary metabolites	4.14248e-10	5.3392e-09	15	0	15	35	Ex vs Sa		9	Photosynthesis	45	2.30206e-08	1.572	0.57	Metabolism	ko00195	Photosynthesis	Metabolism	Energy metabolism	1.5123e-09	2.30206e-08	42	3	45	79	Ex vs Se		9	Starch and sucrose metabolism	120	3.77471e-07	3.77	0.432	Metabolism	ko00500	Starch and sucrose metabolism	Metabolism	Carbohydrate metabolism	2.47973e-08
10	Plant-pathogen interaction	70	6.67882e-09	10.249	0.129	Organismal Systems	ko04626	Plant-pathogen interaction	Organismal Systems	Environmental adaptation	5.7576e-10	6.67882e-09	66	4	70	542	Ex vs Sa		10	Phenylalanine metabolism	56	9.82446e-08	1.956	0.505	Metabolism	ko00360	Phenylalanine metabolism	Metabolism	Amino acid metabolism	7.17114e-09	9.82446e-08	52	4	56	111	Ex vs Se		10	Glycolysis / Gluconeogenesis	143	4.70564e-07	4.493	0.413	Metabolism	ko00010	Glycolysis / Gluconeogenesis	Metabolism	Carbohydrate metabolism	3.43478e-08
11	Tropane, piperidine and pyridine alkaloid biosynthesis	19	1.80896e-08	2.782	0.306	Metabolism	ko00960	Tropane, piperidine and pyridine alkaloid biosynthesis	Metabolism	Biosynthesis of other secondary metabolites	1.7154e-09	1.80896e-08	15	4	19	62	Ex vs Sa		11	Carbon metabolism	232	2.63483e-07	8.103	0.343	Metabolism	ko01200	Carbon metabolism	Metabolism	Global and overview maps	2.11555e-08	2.63483e-07	178	54	232	676	Ex vs Se		11	Carbon fixation in photosynthetic organisms	84	8.85359e-07	2.639	0.464	Metabolism	ko00710	Carbon fixation in photosynthetic organisms	Metabolism	Energy metabolism	7.10872e-08
12	Nitrogen metabolism	17	2.53268e-07	2.489	0.293	Metabolism	ko00910	Nitrogen metabolism	Metabolism	Energy metabolism	2.62002e-08	2.53268e-07	10	7	17	58	Ex vs Sa		12	Flavone and flavonol biosynthesis	17	3.26038e-07	0.594	0.85	Metabolism	ko00944	Flavone and flavonol biosynthesis	Metabolism	Biosynthesis of other secondary metabolites	3.06009e-08	3.26038e-07	16	1	17	20	Ex vs Se		12	Tyrosine metabolism	62	2.26883e-06	1.948	0.496	Metabolism	ko00350	Tyrosine metabolism	Metabolism	Amino acid metabolism	1.9873e-07
13	Sesquiterpenoid and triterpenoid biosynthesis	12	5.48738e-07	1.757	0.4	Metabolism	ko00909	Sesquiterpenoid and triterpenoid biosynthesis	Metabolism	Metabolism of terpenoids and polyketides	6.14965e-08	5.48738e-07	12	0	12	30	Ex vs Sa		13	Fatty acid elongation	38	3.26038e-07	1.327	0.567	Metabolism	ko00062	Fatty acid elongation	Metabolism	Lipid metabolism	3.32582e-08	3.26038e-07	33	5	38	67	Ex vs Se		13	Galactose metabolism	66	2.43009e-06	2.074	0.485	Metabolism	ko00052	Galactose metabolism	Metabolism	Carbohydrate metabolism	2.30592e-07
14	Glutathione metabolism	29	8.60096e-06	4.246	0.16	Metabolism	ko00480	Glutathione metabolism	Metabolism	Metabolism of other amino acids	1.03805e-06	8.60096e-06	26	3	29	181	Ex vs Sa		14	Glyoxylate and dicarboxylate metabolism	80	3.26038e-07	2.794	0.435	Metabolism	ko00630	Glyoxylate and dicarboxylate metabolism	Metabolism	Carbohydrate metabolism	3.33178e-08	3.26038e-07	57	23	80	184	Ex vs Se		14	Phenylalanine, tyrosine and tryptophan biosynthesis	61	2.44833e-06	1.916	0.496	Metabolism	ko00400	Phenylalanine, tyrosine and tryptophan biosynthesis	Metabolism	Amino acid metabolism	2.50194e-07
15	Cutin, suberine and wax biosynthesis	11	2.81145e-05	1.611	0.314	Metabolism	ko00073	Cutin, suberine and wax biosynthesis	Metabolism	Lipid metabolism	3.63549e-06	2.81145e-05	11	0	11	35	Ex vs Sa		15	Tyrosine metabolism	59	5.91997e-07	2.061	0.472	Metabolism	ko00350	Tyrosine metabolism	Metabolism	Amino acid metabolism	6.48171e-08	5.91997e-07	51	8	59	125	Ex vs Se		15	Pyruvate metabolism	109	2.9074e-06	3.424	0.424	Metabolism	ko00620	Pyruvate metabolism	Metabolism	Carbohydrate metabolism	3.18328e-07
16	Biosynthesis of various plant secondary metabolites	16	5.13195e-05	2.343	0.213	Metabolism	ko00999	Biosynthesis of various plant secondary metabolites	Metabolism	Biosynthesis of other secondary metabolites	7.07856e-06	5.13195e-05	12	4	16	75	Ex vs Sa		16	Photosynthesis - antenna proteins	24	6.45433e-07	0.838	0.686	Metabolism	ko00196	Photosynthesis - antenna proteins	Metabolism	Energy metabolism	7.5379e-08	6.45433e-07	24	0	24	35	Ex vs Se		16	Plant hormone signal transduction	228	3.67668e-06	7.163	0.368	Environmental Information Processing	ko04075	Plant hormone signal transduction	Environmental Information Processing	Signal transduction	4.29394e-07
17	Anthocyanin biosynthesis	11	0.000173163	1.611	0.262	Metabolism	ko00942	Anthocyanin biosynthesis	Metabolism	Biosynthesis of other secondary metabolites	2.53773e-05	0.000173163	7	4	11	42	Ex vs Sa		17	Citrate cycle (TCA cycle)	67	7.3206e-07	2.34	0.45	Metabolism	ko00020	Citrate cycle (TCA cycle)	Metabolism	Carbohydrate metabolism	9.08396e-08	7.3206e-07	57	10	67	149	Ex vs Se		17	Citrate cycle (TCA cycle)	70	3.90199e-06	2.199	0.47	Metabolism	ko00020	Citrate cycle (TCA cycle)	Metabolism	Carbohydrate metabolism	4.84189e-07
18	Alanine, aspartate and glutamate metabolism	19	0.000566088	2.782	0.158	Metabolism	ko00250	Alanine, aspartate and glutamate metabolism	Metabolism	Amino acid metabolism	8.78413e-05	0.000566088	12	7	19	120	Ex vs Sa		18	Ubiquinone and other terpenoid-quinone biosynthesis	52	9.0611e-07	1.816	0.486	Metabolism	ko00130	Ubiquinone and other terpenoid-quinone biosynthesis	Metabolism	Metabolism of cofactors and vitamins	1.19051e-07	9.0611e-07	44	8	52	107	Ex vs Se		18	Phagosome	93	7.96566e-06	2.922	0.431	Cellular Processes	ko04145	Phagosome	Cellular Processes	Transport and catabolism	1.04658e-06
19	Ubiquinone and other terpenoid-quinone biosynthesis	17	0.00119242	2.489	0.159	Metabolism	ko00130	Ubiquinone and other terpenoid-quinone biosynthesis	Metabolism	Metabolism of cofactors and vitamins	0.00019531	0.00119242	15	2	17	107	Ex vs Sa		19	Tropane, piperidine and pyridine alkaloid biosynthesis	35	9.76798e-07	1.222	0.565	Metabolism	ko00960	Tropane, piperidine and pyridine alkaloid biosynthesis	Metabolism	Biosynthesis of other secondary metabolites	1.35468e-07	9.76798e-07	34	1	35	62	Ex vs Se		19	Flavonoid biosynthesis	47	4.56053e-05	1.477	0.495	Metabolism	ko00941	Flavonoid biosynthesis	Metabolism	Biosynthesis of other secondary metabolites	6.32482e-06
20	Circadian rhythm - plant	18	0.00210274	2.635	0.146	Organismal Systems	ko04712	Circadian rhythm - plant	Organismal Systems	Environmental adaptation	0.000366636	0.00210274	16	2	18	123	Ex vs Sa		20	Phenylalanine, tyrosine and tryptophan biosynthesis	57	1.61592e-06	1.991	0.463	Metabolism	ko00400	Phenylalanine, tyrosine and tryptophan biosynthesis	Metabolism	Amino acid metabolism	2.359e-07	1.61592e-06	52	5	57	123	Ex vs Se		20	Ascorbate and aldarate metabolism	54	6.65243e-05	1.697	0.47	Metabolism	ko00053	Ascorbate and aldarate metabolism	Metabolism	Carbohydrate metabolism	9.71158e-06
21	Isoquinoline alkaloid biosynthesis	10	0.00210274	1.464	0.213	Metabolism	ko00950	Isoquinoline alkaloid biosynthesis	Metabolism	Biosynthesis of other secondary metabolites	0.000380668	0.00210274	6	4	10	47	Ex vs Sa		21	Oxidative phosphorylation	116	1.81335e-06	4.052	0.38	Metabolism	ko00190	Oxidative phosphorylation	Metabolism	Energy metabolism	2.90053e-07	1.81335e-06	104	12	116	305	Ex vs Se		21	Cyanoamino acid metabolism	33	0.000337229	1.037	0.516	Metabolism	ko00460	Cyanoamino acid metabolism	Metabolism	Metabolism of other amino acids	5.16921e-05
22	Glycerolipid metabolism	25	0.00212059	3.66	0.124	Metabolism	ko00561	Glycerolipid metabolism	Metabolism	Lipid metabolism	0.00040218	0.00212059	20	5	25	201	Ex vs Sa		22	Sesquiterpenoid and triterpenoid biosynthesis	21	1.81335e-06	0.733	0.7	Metabolism	ko00909	Sesquiterpenoid and triterpenoid biosynthesis	Metabolism	Metabolism of terpenoids and polyketides	2.91194e-07	1.81335e-06	21	0	21	30	Ex vs Se		22	Glutathione metabolism	74	0.000622364	2.325	0.409	Metabolism	ko00480	Glutathione metabolism	Metabolism	Metabolism of other amino acids	0.000102721
23	Betalain biosynthesis	5	0.00212847	0.732	0.417	Metabolism	ko00965	Betalain biosynthesis	Metabolism	Biosynthesis of other secondary metabolites	0.000422025	0.00212847	5	0	5	12	Ex vs Sa		23	ABC transporters	54	4.75714e-06	1.886	0.458	Environmental Information Processing	ko02010	ABC transporters	Environmental Information Processing	Membrane transport	7.98644e-07	4.75714e-06	38	16	54	118	Ex vs Se		23	Taurine and hypotaurine metabolism	10	0.000622364	0.314	0.833	Metabolism	ko00430	Taurine and hypotaurine metabolism	Metabolism	Metabolism of other amino acids	0.000104484
24	Brassinosteroid biosynthesis	7	0.00312238	1.025	0.269	Metabolism	ko00905	Brassinosteroid biosynthesis	Metabolism	Metabolism of terpenoids and polyketides	0.000646009	0.00312238	4	3	7	26	Ex vs Sa		24	Glycolysis / Gluconeogenesis	126	7.88775e-06	4.401	0.364	Metabolism	ko00010	Glycolysis / Gluconeogenesis	Metabolism	Carbohydrate metabolism	1.3818e-06	7.88775e-06	90	36	126	346	Ex vs Se		24	Biosynthesis of various plant secondary metabolites	36	0.000936071	1.131	0.48	Metabolism	ko00999	Biosynthesis of various plant secondary metabolites	Metabolism	Biosynthesis of other secondary metabolites	0.000163983
25	Galactose metabolism	17	0.0142983	2.489	0.125	Metabolism	ko00052	Galactose metabolism	Metabolism	Carbohydrate metabolism	0.00308152	0.0142983	12	5	17	136	Ex vs Sa		25	Zeatin biosynthesis	24	8.39321e-06	0.838	0.615	Metabolism	ko00908	Zeatin biosynthesis	Metabolism	Metabolism of terpenoids and polyketides	1.53161e-06	8.39321e-06	9	15	24	39	Ex vs Se		25	Tryptophan metabolism	47	0.00111512	1.477	0.443	Metabolism	ko00380	Tryptophan metabolism	Metabolism	Amino acid metabolism	0.000203489
26	Tryptophan metabolism	14	0.0187916	2.05	0.132	Metabolism	ko00380	Tryptophan metabolism	Metabolism	Amino acid metabolism	0.0042119	0.0187916	7	7	14	106	Ex vs Sa		26	Pyruvate metabolism	98	1.10164e-05	3.423	0.381	Metabolism	ko00620	Pyruvate metabolism	Metabolism	Carbohydrate metabolism	2.0907e-06	1.10164e-05	73	25	98	257	Ex vs Se		26	Anthocyanin biosynthesis	23	0.00115751	0.723	0.548	Metabolism	ko00942	Anthocyanin biosynthesis	Metabolism	Biosynthesis of other secondary metabolites	0.000219673
27	Steroid biosynthesis	11	0.0370202	1.611	0.136	Metabolism	ko00100	Steroid biosynthesis	Metabolism	Lipid metabolism	0.00861677	0.0370202	11	0	11	81	Ex vs Sa		27	Taurine and hypotaurine metabolism	11	1.15255e-05	0.384	0.917	Metabolism	ko00430	Taurine and hypotaurine metabolism	Metabolism	Metabolism of other amino acids	2.27145e-06	1.15255e-05	7	4	11	12	Ex vs Se		27	Fatty acid degradation	51	0.00118491	1.602	0.432	Metabolism	ko00071	Fatty acid degradation	Metabolism	Lipid metabolism	0.000242172
28	Biosynthesis of various alkaloids	3	0.0395206	0.439	0.375	Metabolism	ko00996	Biosynthesis of various alkaloids	Metabolism	Biosynthesis of other secondary metabolites	0.00953945	0.0395206	3	0	3	8	Ex vs Sa		28	Biosynthesis of various plant secondary metabolites	37	2.42361e-05	1.292	0.493	Metabolism	ko00999	Biosynthesis of various plant secondary metabolites	Metabolism	Biosynthesis of other secondary metabolites	4.95336e-06	2.42361e-05	32	5	37	75	Ex vs Se		28	ABC transporters	51	0.00118491	1.602	0.432	Environmental Information Processing	ko02010	ABC transporters	Environmental Information Processing	Membrane transport	0.000242172
																			29	Amino sugar and nucleotide sugar metabolism	103	2.48382e-05	3.598	0.371	Metabolism	ko00520	Amino sugar and nucleotide sugar metabolism	Metabolism	Carbohydrate metabolism	5.25771e-06	2.48382e-05	92	11	103	278	Ex vs Se		29	beta-Alanine metabolism	46	0.00119782	1.445	0.442	Metabolism	ko00410	beta-Alanine metabolism	Metabolism	Metabolism of other amino acids	0.000253552
																			30	Plant hormone signal transduction	202	4.16172e-05	7.056	0.326	Environmental Information Processing	ko04075	Plant hormone signal transduction	Environmental Information Processing	Signal transduction	9.11325e-06	4.16172e-05	106	96	202	619	Ex vs Se		30	Nitrogen metabolism	28	0.00345029	0.88	0.483	Metabolism	ko00910	Nitrogen metabolism	Metabolism	Energy metabolism	0.000755538
																			31	Galactose metabolism	57	5.16007e-05	1.991	0.419	Metabolism	ko00052	Galactose metabolism	Metabolism	Carbohydrate metabolism	1.18292e-05	5.16007e-05	47	10	57	136	Ex vs Se		31	Biosynthesis of amino acids	209	0.00381791	6.566	0.335	Metabolism	ko01230	Biosynthesis of amino acids	Metabolism	Global and overview maps	0.000863906
																			32	Ascorbate and aldarate metabolism	50	5.16007e-05	1.746	0.435	Metabolism	ko00053	Ascorbate and aldarate metabolism	Metabolism	Carbohydrate metabolism	1.20527e-05	5.16007e-05	48	2	50	115	Ex vs Se		32	MAPK signaling pathway - plant	109	0.00504165	3.424	0.36	Environmental Information Processing	ko04016	MAPK signaling pathway - plant	Environmental Information Processing	Signal transduction	0.00117761
																			33	Isoquinoline alkaloid biosynthesis	25	0.000138945	0.873	0.532	Metabolism	ko00950	Isoquinoline alkaloid biosynthesis	Metabolism	Biosynthesis of other secondary metabolites	3.34685e-05	0.000138945	24	1	25	47	Ex vs Se		33	Photosynthesis	35	0.00532152	1.1	0.443	Metabolism	ko00195	Photosynthesis	Metabolism	Energy metabolism	0.00128183
																			34	Diterpenoid biosynthesis	16	0.000179322	0.559	0.64	Metabolism	ko00904	Diterpenoid biosynthesis	Metabolism	Metabolism of terpenoids and polyketides	4.45033e-05	0.000179322	7	9	16	25	Ex vs Se		34	Butanoate metabolism	27	0.00539708	0.848	0.474	Metabolism	ko00650	Butanoate metabolism	Metabolism	Carbohydrate metabolism	0.00133942
																			35	Biosynthesis of amino acids	199	0.000179898	6.951	0.319	Metabolism	ko01230	Biosynthesis of amino acids	Metabolism	Global and overview maps	4.59594e-05	0.000179898	163	36	199	623	Ex vs Se		35	Fructose and mannose metabolism	53	0.00723159	1.665	0.398	Metabolism	ko00051	Fructose and mannose metabolism	Metabolism	Carbohydrate metabolism	0.00184749
																			36	Cutin, suberine and wax biosynthesis	20	0.000201981	0.699	0.571	Metabolism	ko00073	Cutin, suberine and wax biosynthesis	Metabolism	Lipid metabolism	5.30752e-05	0.000201981	11	9	20	35	Ex vs Se		36	Neomycin, kanamycin and gentamicin biosynthesis	9	0.00879484	0.283	0.692	Metabolism	ko00524	Neomycin, kanamycin and gentamicin biosynthesis	Metabolism	Biosynthesis of other secondary metabolites	0.00231105
																			37	Nitrogen metabolism	28	0.000414256	0.978	0.483	Metabolism	ko00910	Nitrogen metabolism	Metabolism	Energy metabolism	0.000111879	0.000414256	16	12	28	58	Ex vs Se		37	Diterpenoid biosynthesis	14	0.0106278	0.44	0.56	Metabolism	ko00904	Diterpenoid biosynthesis	Metabolism	Metabolism of terpenoids and polyketides	0.00287028
																			38	Glutathione metabolism	68	0.000445612	2.375	0.376	Metabolism	ko00480	Glutathione metabolism	Metabolism	Metabolism of other amino acids	0.0001236	0.000445612	57	11	68	181	Ex vs Se		38	Plant-pathogen interaction	180	0.0113308	5.655	0.332	Organismal Systems	ko04626	Plant-pathogen interaction	Organismal Systems	Environmental adaptation	0.00314286
																			39	Isoflavonoid biosynthesis	15	0.000777654	0.524	0.6	Metabolism	ko00943	Isoflavonoid biosynthesis	Metabolism	Biosynthesis of other secondary metabolites	0.000221376	0.000777654	15	0	15	25	Ex vs Se		39	Phenylpropanoid biosynthesis	69	0.0113965	2.168	0.373	Metabolism	ko00940	Phenylpropanoid biosynthesis	Metabolism	Biosynthesis of other secondary metabolites	0.00324427
																			40	Starch and sucrose metabolism	95	0.00133377	3.318	0.342	Metabolism	ko00500	Starch and sucrose metabolism	Metabolism	Carbohydrate metabolism	0.000389422	0.00133377	74	21	95	278	Ex vs Se		40	Cysteine and methionine metabolism	83	0.0115943	2.608	0.362	Metabolism	ko00270	Cysteine and methionine metabolism	Metabolism	Amino acid metabolism	0.00338521
																			41	Carotenoid biosynthesis	30	0.00213698	1.048	0.435	Metabolism	ko00906	Carotenoid biosynthesis	Metabolism	Metabolism of terpenoids and polyketides	0.000639533	0.00213698	20	10	30	69	Ex vs Se		41	Arginine and proline metabolism	46	0.0230847	1.445	0.387	Metabolism	ko00330	Arginine and proline metabolism	Metabolism	Amino acid metabolism	0.00693598
																			42	Anthocyanin biosynthesis	19	0.0115471	0.664	0.452	Metabolism	ko00942	Anthocyanin biosynthesis	Metabolism	Biosynthesis of other secondary metabolites	0.00354	0.0115471	17	2	19	42	Ex vs Se		42	Ubiquinone and other terpenoid-quinone biosynthesis	42	0.0230847	1.32	0.393	Metabolism	ko00130	Ubiquinone and other terpenoid-quinone biosynthesis	Metabolism	Metabolism of cofactors and vitamins	0.00707705
																			43	alpha-Linolenic acid metabolism	44	0.013953	1.537	0.361	Metabolism	ko00592	alpha-Linolenic acid metabolism	Metabolism	Lipid metabolism	0.004443	0.013953	34	10	44	122	Ex vs Se		43	Cutin, suberine and wax biosynthesis	17	0.0235725	0.534	0.486	Metabolism	ko00073	Cutin, suberine and wax biosynthesis	Metabolism	Lipid metabolism	0.00739867
																			44	Cyanoamino acid metabolism	26	0.013953	0.908	0.406	Metabolism	ko00460	Cyanoamino acid metabolism	Metabolism	Metabolism of other amino acids	0.00448126	0.013953	23	3	26	64	Ex vs Se		44	Biosynthesis of various alkaloids	6	0.0238212	0.189	0.75	Metabolism	ko00996	Biosynthesis of various alkaloids	Metabolism	Biosynthesis of other secondary metabolites	0.00765062
																			45	Cysteine and methionine metabolism	74	0.0241186	2.585	0.323	Metabolism	ko00270	Cysteine and methionine metabolism	Metabolism	Amino acid metabolism	0.00792218	0.0241186	69	5	74	229	Ex vs Se		45	Carotenoid biosynthesis	29	0.0242298	0.911	0.42	Metabolism	ko00906	Carotenoid biosynthesis	Metabolism	Metabolism of terpenoids and polyketides	0.00795868
																			46	Circadian rhythm - plant	43	0.027048	1.502	0.35	Organismal Systems	ko04712	Circadian rhythm - plant	Organismal Systems	Environmental adaptation	0.00908182	0.027048	32	11	43	123	Ex vs Se		46	Sesquiterpenoid and triterpenoid biosynthesis	15	0.0249306	0.471	0.5	Metabolism	ko00909	Sesquiterpenoid and triterpenoid biosynthesis	Metabolism	Metabolism of terpenoids and polyketides	0.00837085
																			47	Betalain biosynthesis	7	0.0423624	0.244	0.583	Metabolism	ko00965	Betalain biosynthesis	Metabolism	Biosynthesis of other secondary metabolites	0.0145331	0.0423624	7	0	7	12	Ex vs Se		47	Arachidonic acid metabolism	27	0.028144	0.848	0.422	Metabolism	ko00590	Arachidonic acid metabolism	Metabolism	Lipid metabolism	0.00965525
																			48	Aflatoxin biosynthesis	3	0.0451027	0.105	1	Metabolism	ko00254	Aflatoxin biosynthesis	Metabolism	Biosynthesis of other secondary metabolites	0.0158024	0.0451027	3	0	3	3	Ex vs Se		48	alpha-Linolenic acid metabolism	46	0.0330059	1.445	0.377	Metabolism	ko00592	alpha-Linolenic acid metabolism	Metabolism	Lipid metabolism	0.0115641
																																						49	Tropane, piperidine and pyridine alkaloid biosynthesis	26	0.0335208	0.817	0.419	Metabolism	ko00960	Tropane, piperidine and pyridine alkaloid biosynthesis	Metabolism	Biosynthesis of other secondary metabolites	0.0119892
																																						50	Photosynthesis - antenna proteins	16	0.0491301	0.503	0.457	Metabolism	ko00196	Photosynthesis - antenna proteins	Metabolism	Energy metabolism	0.0182893
																																						51	Stilbenoid, diarylheptanoid and gingerol biosynthesis	16	0.0491301	0.503	0.457	Metabolism	ko00945	Stilbenoid, diarylheptanoid and gingerol biosynthesis	Metabolism	Biosynthesis of other secondary metabolites	0.0182893
[truncated: 5 more columns]
