# Supplementary material for: Integrated Untargeted Metabolome, Full-Length Sequencing and Transcriptome Analyses Reveal the Mechanism of Flavonoid Biosynthesis in Blueberry (Vaccinium spp.) Fruit
Source: Int J Mol Sci. 2024 Apr 9;25(8):4137. doi: 10.3390/ijms25084137 (PMC11050320; doi:10.3390/ijms25084137)
Supplement: Supplementary file 1 [file ijms-25-04137-s001.zip › Table S7.DEGs and DEMs involved in flavonoid biosynthesis pathway.xlsx]

## Sheet: Table 7_DEGs
						Table S7.DEGs and DEMs involved in flavonoid biosynthesis pathway.
new	new	IF语句-335DEGs	new	new		ID	Name	Ex_1	Ex_2	Ex_3	Sa_1	Sa_2	Sa_3	Se_1	Se_2	Se_3
Vc10a222.29	PAL	PAL(Vc10a222.29)	PAL(Vc10a222.29)	Vc10a222.29	1	Vc10a222.29	PAL	15.2159	16.8133	14.8172	0.0219478	0.00744837	0.108275	0.022574	0.00802263	0.0227465
Vc10a222.30	PAL	PAL(Vc10a222.30)	PAL(Vc10a222.30)	Vc10a222.30	1	Vc10a222.30	PAL	4.7896	5.52216	5.56966	0.00676757	0	0.310494	0	0.0148426	0
Vc10p225.6	PAL	PAL(Vc10p225.6)	PAL(Vc10p225.6)	Vc10p225.6	1	Vc10p225.6	PAL	74.9463	74.3254	71.3369	0.351553	0.293493	1.24871	0.0433901	0.0308411	0.0437217
Vc11p299.22	PAL	PAL(Vc11p299.22)	PAL(Vc11p299.22)	Vc11p299.22	1	Vc11p299.22	PAL	20.3616	26.6054	28.5856	0.0758218	0.00701768	0.0102014	0.0106343	0.0226762	0
Vc15a283.32	PAL	PAL(Vc15a283.32)	PAL(Vc15a283.32)	Vc15a283.32	1	Vc15a283.32	PAL	41.0033	38.1974	41.0544	0.113991	0.0409606	0.119086	0.12414	0.0294124	0.0104241
Vc19a331.32	PAL	PAL(Vc19a331.32)	PAL(Vc19a331.32)	Vc19a331.32	1	Vc19a331.32	PAL	65.86	72.8027	73.9716	0.131071	0.153461	0.232781	0.0303325	0.0287466	0.0509405
Vc1a185.22	PAL	PAL(Vc1a185.22)	PAL(Vc1a185.22)	Vc1a185.22	1	Vc1a185.22	PAL	3.6794	3.77252	3.6745	0.0281351	0.0143222	0.156149	0.0542586	0.00771324	0
Vc1a186.19	PAL	PAL(Vc1a186.19)	PAL(Vc1a186.19)	Vc1a186.19	1	Vc1a186.19	PAL	4.97876	4.61179	5.28075	0.0144407	0	0.0641162	0.0556977	0.0158356	0.0224493
Vc1a187.25	PAL	PAL(Vc1a187.25)	PAL(Vc1a187.25)	Vc1a187.25	1	Vc1a187.25	PAL	7.16905	8.14759	8.09017	0.00711889	0.0144955	0.0526794	0.021966	0.00780657	0.0110669
Vc24a101.15	PAL	PAL(Vc24a101.15)	PAL(Vc24a101.15)	Vc24a101.15	1	Vc24a101.15	PAL	332.229	331.032	331.179	0.626732	0.379979	0.594053	0.282471	0.162166	0.197051
Vc26a180.26	PAL	PAL(Vc26a180.26)	PAL(Vc26a180.26)	Vc26a180.26	1	Vc26a180.26	PAL	1.37568	1.43757	1.23729	0.00712724	0	0	0	0	0
Vc29a173.18	PAL	PAL(Vc29a173.18)	PAL(Vc29a173.18)	Vc29a173.18	1	Vc29a173.18	PAL	1.17707	1.61851	1.49266	0	0	0	0	0	0
Vc33a169.12	PAL	PAL(Vc33a169.12)	PAL(Vc33a169.12)	Vc33a169.12	1	Vc33a169.12	PAL	1.95081	1.72892	1.56707	0	0.00724494	0	0	0	0
Vc5a235.33	PAL	PAL(Vc5a235.33)	PAL(Vc5a235.33)	Vc5a235.33	1	Vc5a235.33	PAL	9.78737	10.0409	10.8762	0.0144579	0	0.0106987	0.0223056	0	0
Vc5s236.31	PAL	PAL(Vc5s236.31)	PAL(Vc5s236.31)	Vc5s236.31	1	Vc5s236.31	PAL	3.15845	2.74478	2.82547	0	0.0065314	0.00949453	0	0	0.0498655
Vc5s236.34	PAL	PAL(Vc5s236.34)	PAL(Vc5s236.34)	Vc5s236.34	1	Vc5s236.34	PAL	5.92664	5.57617	5.82944	0.0452384	0	0.145063	0.0232646	0	0
Vc8a235.20	PAL	PAL(Vc8a235.20)	PAL(Vc8a235.20)	Vc8a235.20	1	Vc8a235.20	PAL	25.5099	24.2515	25.5216	0.104072	0.0463557	0.163652	0.0301054	0.0213985	0.0404472
Vc8a235.22	PAL	PAL(Vc8a235.22)	PAL(Vc8a235.22)	Vc8a235.22	1	Vc8a235.22	PAL	19.0548	16.6298	17.2865	0.0286208	0.0145695	0.105896	0.23182	0.188313	0.088987
Vc8a236.15	PAL	PAL(Vc8a236.15)	PAL(Vc8a236.15)	Vc8a236.15	1	Vc8a236.15	PAL	40.2782	41.6107	33.1422	0.779602	0.48737	1.42707	0.0633037	0.112488	0.159468
Vc21a13.24	C4H	C4H(Vc21a13.24)	C4H(Vc21a13.24)	Vc21a13.24	2	Vc21a13.24	C4H	42.9437	47.854	46.9364	0.183302	0.289262	0.366236	0.0282799	0.0804037	0
Vc22a301.32	C4H	C4H(Vc22a301.32)	C4H(Vc22a301.32)	Vc22a301.32	2	Vc22a301.32	C4H	0.588478	0.388735	0.45611	0	0.00996179	0.0144812	21.2095	22.7687	23.4403
Vc24a58.38	C4H	C4H(Vc24a58.38)	C4H(Vc24a58.38)	Vc24a58.38	2	Vc24a58.38	C4H	1.25093	1.03127	1.02309	0	0	0	0.0761872	0.120339	0.0938293
Vc29a7.44	C4H	C4H(Vc29a7.44)	C4H(Vc29a7.44)	Vc29a7.44	2	Vc29a7.44	C4H	194.322	187.382	189.056	0.953711	0.379143	1.54591	0.196185	0.199207	0.0706013
Vc302a0.32	C4H	C4H(Vc302a0.32)	C4H(Vc302a0.32)	Vc302a0.32	2	Vc302a0.32	C4H	52.6626	53.415	53.6134	0.382437	0.704557	0.660336	0.0280963	0.199705	0.169866
Vc33p307.8	C4H	C4H(Vc33p307.8)	C4H(Vc33p307.8)	Vc33p307.8	2	Vc33p307.8	C4H	64.1339	63.0494	60.8789	0.658259	0.326915	0.85541	0.0495396	0.193666	0.124795
Vc43a75.21	C4H	C4H(Vc43a75.21)	C4H(Vc43a75.21)	Vc43a75.21	2	Vc43a75.21	C4H	0.398591	0.435458	0.363302	0.00982683	0	0	20.27	28.1579	22.8386
Vc46a145.24	C4H	C4H(Vc46a145.24)	C4H(Vc46a145.24)	Vc46a145.24	2	Vc46a145.24	C4H	4.42587	4.01947	4.15023	0.0776523	0.0494113	0.186753	182.533	195.246	178.994
Vc47a123.34	C4H	C4H(Vc47a123.34)	C4H(Vc47a123.34)	Vc47a123.34	2	Vc47a123.34	C4H	0.438244	0.411972	0.491933	0.0364335	0.00741861	0.0107842	12.4223	16.109	12.4719
Vc17a300.24	4CL	4CL(Vc17a300.24)	4CL(Vc17a300.24)	Vc17a300.24	3	Vc17a300.24	4CL	2.33635	2.38147	2.01698	0.591436	0.374305	0.86349	0.221951	0.210346	0.223647
Vc22s254.43	4CL	4CL(Vc22s254.43)	4CL(Vc22s254.43)	Vc22s254.43	3	Vc22s254.43	4CL	14.4298	12.7658	14.8065	20.3853	18.2181	22.8794	1.00097	1.15944	0.99617
Vc34a78.26	4CL	4CL(Vc34a78.26)	4CL(Vc34a78.26)	Vc34a78.26	3	Vc34a78.26	4CL	4.11044	3.69077	3.90651	1.2189	1.1496	1.2838	1.4998	1.25464	0.848629
Vc43a132.29	4CL	4CL(Vc43a132.29)	4CL(Vc43a132.29)	Vc43a132.29	3	Vc43a132.29	4CL	9.68961	8.22785	9.05102	12.7555	12.5853	15.6588	1.16505	0.963117	1.21223
Vc43a132.31	4CL	4CL(Vc43a132.31)	4CL(Vc43a132.31)	Vc43a132.31	3	Vc43a132.31	4CL	2.67961	1.84429	2.10946	3.19942	2.90625	3.85613	0.0295572	0	0
Vc46a86.22	4CL	4CL(Vc46a86.22)	4CL(Vc46a86.22)	Vc46a86.22	3	Vc46a86.22	4CL	6.52518	5.66929	5.47661	4.4724	4.50662	4.8658	0.0283368	0.0402828	0
Vc46a86.25	4CL	4CL(Vc46a86.25)	4CL(Vc46a86.25)	Vc46a86.25	3	Vc46a86.25	4CL	17.8345	18.7996	17.8473	28.2778	25.4099	24.8146	3.78882	4.73694	4.98673
Vc47a69.25	4CL	4CL(Vc47a69.25)	4CL(Vc47a69.25)	Vc47a69.25	3	Vc47a69.25	4CL	1.99949	2.71269	2.01253	4.0551	3.77654	4.89524	0	0	0
Vc47a69.26	4CL	4CL(Vc47a69.26)	4CL(Vc47a69.26)	Vc47a69.26	3	Vc47a69.26	4CL	7.42224	6.09939	6.74138	10.2942	9.48244	9.88052	0.45617	0.460761	0.60481
Vc10s65.37	C3'H	C3'H(Vc10s65.37)	C3'H(Vc10s65.37)	Vc10s65.37	5	Vc10s65.37	C3'H	44.969	44.0957	46.9797	22.9113	20.5331	24.1486	2.15108	2.23972	1.78088
Vc1a373.37	C3'H	C3'H(Vc1a373.37)	C3'H(Vc1a373.37)	Vc1a373.37	5	Vc1a373.37	C3'H	7.54637	5.30992	6.94132	3.48515	2.63791	2.97749	0.125408	0.133708	0.157958
Vc5s352.42	C3'H	C3'H(Vc5s352.42)	C3'H(Vc5s352.42)	Vc5s352.42	5	Vc5s352.42	C3'H	2.00886	1.66417	1.92643	0.532653	0.459983	0.844629	0.0733728	0.088659	0.125687
Vc8a79.42	C3'H	C3'H(Vc8a79.42)	C3'H(Vc8a79.42)	Vc8a79.42	5	Vc8a79.42	C3'H	1.6924	2.13454	1.69197	0.806669	0.651009	0.888117	0.0607087	0.0647263	0
Vc8s79.46	C3'H	C3'H(Vc8s79.46)	C3'H(Vc8s79.46)	Vc8s79.46	5	Vc8s79.46	C3'H	3.80223	4.14684	5.38033	1.98798	1.74156	2.34007	0.0784597	0.162234	0.0646848
Vc19p4.6	COMT	COMT(Vc19p4.6)	COMT(Vc19p4.6)	Vc19p4.6	6	Vc19p4.6	COMT	21.7469	18.6329	18.1405	0.663857	0.524693	1.13763	2.58745	3.00773	2.07763
Vc20a5.31	COMT	COMT(Vc20a5.31)	COMT(Vc20a5.31)	Vc20a5.31	6	Vc20a5.31	COMT	20.4966	17.1155	18.2593	0.330859	0.203513	0.520272	2.94571	2.49438	1.66092
Vc48a105.37	COMT	COMT(Vc48a105.37)	COMT(Vc48a105.37)	Vc48a105.37	6	Vc48a105.37	COMT	22.1442	16.0178	35.5587	0.82621	0.494186	0.917087	1.97575	2.53686	2.21562
Vc12a395.19	F5H	F5H(Vc12a395.19)	F5H(Vc12a395.19)	Vc12a395.19	7	Vc12a395.19	F5H	1.00666	1.09976	1.3066	0	0.00862061	0.0125315	0.300457	0.287843	0.408059
Vc14a46.20	CCR	CCR(Vc14a46.20)	CCR(Vc14a46.20)	Vc14a46.20	8	Vc14a46.20	CCR	199.074	192.785	192.979	12.7081	15.3481	14.901	15.0285	13.6367	12.7523
Vc17s335.37	CCR	CCR(Vc17s335.37)	CCR(Vc17s335.37)	Vc17s335.37	8	Vc17s335.37	CCR	5.76856	4.68157	4.48276	0.0916512	0	0.387551	0.101	0.0430734	0.14248
Vc25a44.25	CCR	CCR(Vc25a44.25)	CCR(Vc25a44.25)	Vc25a44.25	8	Vc25a44.25	CCR	14.2583	15.8398	16.7393	1.10826	1.20614	1.44226	1.41503	1.19437	1.1882
Vc2a63.19	CCR	CCR(Vc2a63.19)	CCR(Vc2a63.19)	Vc2a63.19	8	Vc2a63.19	CCR	48.8232	37.5673	39.5882	0.714814	0.860074	0.288523	3.55908	3.55114	3.99037
Vc35p293.6	CCR	CCR(Vc35p293.6)	CCR(Vc35p293.6)	Vc35p293.6	8	Vc35p293.6	CCR	24.6992	28.7944	27.2879	16.3452	15.1461	10.7705	0.457052	0.225993	0.380449
Vc36a33.15	CCR	CCR(Vc36a33.15)	CCR(Vc36a33.15)	Vc36a33.15	8	Vc36a33.15	CCR	9.60048	10.6383	9.42553	0	0.119799	0.0290247	0.0605129	0.172047	0
Vc36p33.3	CCR	CCR(Vc36p33.3)	CCR(Vc36p33.3)	Vc36p33.3	8	Vc36p33.3	CCR	73.9009	71.4465	72.3798	33.8789	33.3622	36.8119	0.622705	0.262799	0.54903
Vc3a382.28	CCR	CCR(Vc3a382.28)	CCR(Vc3a382.28)	Vc3a382.28	8	Vc3a382.28	CCR	429.491	417.921	429.373	14.1096	17.5377	17.4359	31.0765	32.3025	30.3047
Vc4p398.7	CCR	CCR(Vc4p398.7)	CCR(Vc4p398.7)	Vc4p398.7	8	Vc4p398.7	CCR	65.0437	65.2944	65.3701	32.5214	32.6981	34.7218	0.120852	0.501084	0.385624
Vc8s149.28	CCR	CCR(Vc8s149.28)	CCR(Vc8s149.28)	Vc8s149.28	8	Vc8s149.28	CCR	10.5531	9.73576	10.0618	2.04928	1.3846	1.59917	0.114968	0.122577	0.0289617
Vc9p377.29	CCR	CCR(Vc9p377.29)	CCR(Vc9p377.29)	Vc9p377.29	8	Vc9p377.29	CCR	31.9473	40.4639	41.5693	28.5778	23.6306	24.2019	0.590033	0.506157	0.389527
Vc9s378.39	CCR	CCR(Vc9s378.39)	CCR(Vc9s378.39)	Vc9s378.39	8	Vc9s378.39	CCR	2.76427	2.29945	2.56402	0.0501612	0.102139	0.074238	0.0154777	0.0110013	0.031192
Vc12s1.33	CAD	CAD(Vc12s1.33)	CAD(Vc12s1.33)	Vc12s1.33	9	Vc12s1.33	CAD	14.4662	15.4673	15.6418	0.87494	1.30358	1.47387	0.285336	0.0858052	0.353866
Vc12s46.68	CAD	CAD(Vc12s46.68)	CAD(Vc12s46.68)	Vc12s46.68	9	Vc12s46.68	CAD	5.58723	4.59384	4.67692	0.158957	0.105544	0.572794	0.138613	0.0606303	0.118184
Vc149s2.68	CAD	CAD(Vc149s2.68)	CAD(Vc149s2.68)	Vc149s2.68	9	Vc149s2.68	CAD	12.3066	12.9034	11.4583	0.371183	0.549677	0.549347	0.20824	0.259025	0.11803
Vc14a183.19	CAD	CAD(Vc14a183.19)	CAD(Vc14a183.19)	Vc14a183.19	9	Vc14a183.19	CAD	0.18609	0.338837	0.089109	0.0110873	0.0451521	0.147682	5.06322	4.26757	4.87784
Vc3a213.23	CAD	CAD(Vc3a213.23)	CAD(Vc3a213.23)	Vc3a213.23	9	Vc3a213.23	CAD	1.7983	1.68107	1.4488	0.0132548	0.0674738	0.274637	12.4742	13.5323	15.5779
Vc120s3.69	HCT	HCT(Vc120s3.69)	HCT(Vc120s3.69)	Vc120s3.69	11	Vc120s3.69	HCT	3.16789	4.14397	2.75444	2.09356	1.79771	2.40378	0.287362	0.531057	0.335887
Vc17p329.4	HCT	HCT(Vc17p329.4)	HCT(Vc17p329.4)	Vc17p329.4	11	Vc17p329.4	HCT	8.13545	7.34888	7.93295	0.386091	0.521259	0.447191	0.427322	0.358958	0.221818
Vc17p332.40	HCT	HCT(Vc17p332.40)	HCT(Vc17p332.40)	Vc17p332.40	11	Vc17p332.40	HCT	3.67729	3.88511	3.97302	0.125946	0.120212	0.465998	0.133588	0.189905	0.17132
Vc27s291.30	HCT	HCT(Vc27s291.30)	HCT(Vc27s291.30)	Vc27s291.30	11	Vc27s291.30	HCT	7.23597	7.42512	7.39969	1.1253	0.587714	0.843529	0.0676406	0.0641039	0.0908766
Vc36a175.16	HCT	HCT(Vc36a175.16)	HCT(Vc36a175.16)	Vc36a175.16	11	Vc36a175.16	HCT	3.29279	3.83986	3.01885	0	0	0	0	0	0
Vc4a276.27	HCT	HCT(Vc4a276.27)	HCT(Vc4a276.27)	Vc4a276.27	11	Vc4a276.27	HCT	1.79133	1.83017	2.34459	0	0	0	0	0	0
Vc13a312.29	CSE	CSE(Vc13a312.29)	CSE(Vc13a312.29)	Vc13a312.29	12	Vc13a312.29	CSE	0.271381	0.158124	0.353466	0.0129352	0	0.0191439	9.17993	8.46826	7.68159
Vc32a69.14	CSE	CSE(Vc32a69.14)	CSE(Vc32a69.14)	Vc32a69.14	12	Vc32a69.14	CSE	0.797183	0.586536	0.299152	0	0.071054	0.0344298	9.06246	8.63539	9.58377
Vc42a210.23	CSE	CSE(Vc42a210.23)	CSE(Vc42a210.23)	Vc42a210.23	12	Vc42a210.23	CSE	0.128838	0.265869	0.0658066	0	0	0.0302951	11.906	13.3112	10.6445
Vc34s139.31	CCoAOMT	CCoAOMT(Vc34s139.31)	CCoAOMT(Vc34s139.31)	Vc34s139.31	13	Vc34s139.31	CCoAOMT	82.0321	76.213	79.0338	6.13989	6.20077	14.544	0.330145	0.992801	0.127949
Vc45s216.26	CCoAOMT	CCoAOMT(Vc45s216.26)	CCoAOMT(Vc45s216.26)	Vc45s216.26	13	Vc45s216.26	CCoAOMT	247.745	217.03	230.721	12.3452	11.2897	26.488	0.981019	0.459193	0.530423
Vc13a46.32	CHS	CHS(Vc13a46.32)	CHS(Vc13a46.32)	Vc13a46.32	14	Vc13a46.32	CHS	31.1309	25.9574	27.9703	1.57997	1.18754	0.784678	0.0163596	0	0.0164846
Vc30a303.29	CHS	CHS(Vc30a303.29)	CHS(Vc30a303.29)	Vc30a303.29	14	Vc30a303.29	CHS	32.153	31.4175	31.9974	1.15047	0.773699	0.577974	0	0.0231486	0
Vc32a318.21	CHS	CHS(Vc32a318.21)	CHS(Vc32a318.21)	Vc32a318.21	14	Vc32a318.21	CHS	37.5431	34.3926	34.6774	1.43389	1.24972	1.67199	1.79322	0.976793	1.33408
Vc42a14.30	CHS	CHS(Vc42a14.30)	CHS(Vc42a14.30)	Vc42a14.30	14	Vc42a14.30	CHS	32.2582	29.8396	31.0384	1.68452	1.29156	0.677132	0.0802123	0	0.0161651
Vc10a113.26	PGT1	PGT1(Vc10a113.26)	PGT1(Vc10a113.26)	Vc10a113.26	15	Vc10a113.26	PGT1	0.32291	0.337438	0.371099	0	0	0	4.1658	2.97199	2.20024
Vc10a113.31	PGT1	PGT1(Vc10a113.31)	PGT1(Vc10a113.31)	Vc10a113.31	15	Vc10a113.31	PGT1	2.02849	1.54457	1.90736	0.252703	0.190162	0.325216	7.06852	5.38566	4.885
Vc1a316.27	PGT1	PGT1(Vc1a316.27)	PGT1(Vc1a316.27)	Vc1a316.27	15	Vc1a316.27	PGT1	2.38241	1.99393	2.03345	0.328713	0.233251	0.60443	11.5105	9.94013	11.3971
Vc1s317.29	PGT1	PGT1(Vc1s317.29)	PGT1(Vc1s317.29)	Vc1s317.29	15	Vc1s317.29	PGT1	0.631316	0.80466	0.362766	0.00835866	0.00850998	0.0123707	12.0317	7.10373	8.06944
Vc21p49.17	PGT1	PGT1(Vc21p49.17)	PGT1(Vc21p49.17)	Vc21p49.17	15	Vc21p49.17	PGT1	3.26592	3.25317	3.32752	3.57119	4.09532	5.63381	0.590318	0.4949	0.701593
Vc26s51.59	PGT1	PGT1(Vc26s51.59)	PGT1(Vc26s51.59)	Vc26s51.59	15	Vc26s51.59	PGT1	19.6471	19.6442	20.231	28.094	29.8954	36.7889	1.61237	1.4911	1.69457
Vc29p50.35	PGT1	PGT1(Vc29p50.35)	PGT1(Vc29p50.35)	Vc29p50.35	15	Vc29p50.35	PGT1	8.04714	7.16257	7.13557	4.27855	4.77228	5.40291	0.585749	0.848697	0.885337
Vc5a295.31	PGT1	PGT1(Vc5a295.31)	PGT1(Vc5a295.31)	Vc5a295.31	15	Vc5a295.31	PGT1	0.474803	0.330094	0.429914	0	0.0104731	0.152244	5.42773	3.27136	4.3018
Vc5a295.34	PGT1	PGT1(Vc5a295.34)	PGT1(Vc5a295.34)	Vc5a295.34	15	Vc5a295.34	PGT1	1.20373	1.09589	1.79129	0	0	0.0326593	12.5457	7.07819	6.44943
Vc5a297.44	PGT1	PGT1(Vc5a297.44)	PGT1(Vc5a297.44)	Vc5a297.44	15	Vc5a297.44	PGT1	0.489398	0.233915	0.246065	0	0	0.0161828	3.88001	2.48207	2.3118
Vc5s297.56	PGT1	PGT1(Vc5s297.56)	PGT1(Vc5s297.56)	Vc5s297.56	15	Vc5s297.56	PGT1	0.582175	0.173461	0.304117	0.0189197	0.00963111	0.0560019	8.31895	6.12046	5.38246
Vc8s136.47	PGT1	PGT1(Vc8s136.47)	PGT1(Vc8s136.47)	Vc8s136.47	15	Vc8s136.47	PGT1	4.07668	3.26862	3.26748	0.225168	0.146462	0.305476	1.21586	1.2003	1.11819
Vc29p189.2	CHI	CHI(Vc29p189.2)	CHI(Vc29p189.2)	Vc29p189.2	18	Vc29p189.2	CHI	37.5205	35.4395	33.9769	19.578	16.7567	20.4212	1.72681	1.46884	1.71148
Vc33p155.13	CHI	CHI(Vc33p155.13)	CHI(Vc33p155.13)	Vc33p155.13	18	Vc33p155.13	CHI	24.146	25.8826	28.2429	16.6134	17.3738	23.3048	0.668637	1.26735	0.870256
Vc14s361.43	HIDH	HIDH(Vc14s361.43)	HIDH(Vc14s361.43)	Vc14s361.43	20	Vc14s361.43	HIDH	1.70066	1.67216	1.7468	1.16271	1.04449	1.24842	0	0.00833351	0.0590698
Vc1s72.45	HIDH	HIDH(Vc1s72.45)	HIDH(Vc1s72.45)	Vc1s72.45	20	Vc1s72.45	HIDH	6.51837	7.24174	7.27993	0.0963615	0.0356749	0.181509	0.0270302	0.0384254	0.108947
Vc2s414.34	HIDH	HIDH(Vc2s414.34)	HIDH(Vc2s414.34)	Vc2s414.34	20	Vc2s414.34	HIDH	2.44996	2.48341	2.89298	1.62522	1.58723	2.12915	0.00928663	0.0198024	0.0374304
Vc2s415.58	HIDH	HIDH(Vc2s415.58)	HIDH(Vc2s415.58)	Vc2s415.58	20	Vc2s415.58	HIDH	1.31741	2.01497	1.63789	1.52416	1.05485	1.55875	0	0	0
Vc34s134.29	HIDH	HIDH(Vc34s134.29)	HIDH(Vc34s134.29)	Vc34s134.29	20	Vc34s134.29	HIDH	1.55669	1.65152	1.40638	0.0128667	0.0261993	0.104735	0.367239	0.366851	0.290036
Vc3s8.40	HIDH	HIDH(Vc3s8.40)	HIDH(Vc3s8.40)	Vc3s8.40	20	Vc3s8.40	HIDH	3.56171	3.0472	3.32746	4.23712	4.7216	5.17271	0.0065045	0	0.00655421
Vc3s8.47	HIDH	HIDH(Vc3s8.47)	HIDH(Vc3s8.47)	Vc3s8.47	20	Vc3s8.47	HIDH	2.63772	2.35419	2.10654	1.29773	1.28218	2.22339	0.00986277	0.0210309	0.0496907
Vc8s351.42	HIDH	HIDH(Vc8s351.42)	HIDH(Vc8s351.42)	Vc8s351.42	20	Vc8s351.42	HIDH	2.37812	2.1396	2.22776	0.0285759	0.0363666	0.0740112	0.0330652	0	0.0333179
Vc12s106.30	CYP81E	CYP81E(Vc12s106.30)	CYP81E(Vc12s106.30)	Vc12s106.30	21	Vc12s106.30	CYP81E	2.19659	2.27606	2.99284	1.01191	0.651102	0.850643	7.91824	6.6313	9.3379
Vc23s306.43	CYP81E	CYP81E(Vc23s306.43)	CYP81E(Vc23s306.43)	Vc23s306.43	21	Vc23s306.43	CYP81E	2.75106	3.15879	2.61482	0.174449	0.106564	0.458273	1.46008	1.24345	1.44412
Vc31a73.24	CYP81E	CYP81E(Vc31a73.24)	CYP81E(Vc31a73.24)	Vc31a73.24	21	Vc31a73.24	CYP81E	3.8647	4.22216	3.48158	0.708491	0.752232	1.19835	0.640221	0.399565	0.361893
Vc41a34.48	CYP81E	CYP81E(Vc41a34.48)	CYP81E(Vc41a34.48)	Vc41a34.48	21	Vc41a34.48	CYP81E	5.41331	5.39307	5.35085	1.90508	1.30665	1.85493	13.9223	13.0954	12.1738
Vc21s378.56	PTS	PTS(Vc21s378.56)	PTS(Vc21s378.56)	Vc21s378.56	22	Vc21s378.56	PTS	2.71633	3.43206	2.85025	0.709279	1.49582	1.67456	0	0.0555567	0
Vc33s7.33	PTS	PTS(Vc33s7.33)	PTS(Vc33s7.33)	Vc33s7.33	22	Vc33s7.33	PTS	7.4663	7.84533	8.04426	1.72377	2.41545	3.15466	0	0.0203256	0.0288145
Vc13a41.36	F3H	F3H(Vc13a41.36)	F3H(Vc13a41.36)	Vc13a41.36	23	Vc13a41.36	F3H	252.962	220.765	221.604	5.63788	4.55617	3.84184	0.563187	0.548566	0.294254
Vc16a381.32	F3H	F3H(Vc16a381.32)	F3H(Vc16a381.32)	Vc16a381.32	23	Vc16a381.32	F3H	180.511	175.606	174.927	123.253	116.54	129.043	1.61626	1.42564	1.21655
Vc30a297.38	F3H	F3H(Vc30a297.38)	F3H(Vc30a297.38)	Vc30a297.38	23	Vc30a297.38	F3H	374.018	349.045	365.37	16.7454	15.1767	12.9486	1.00903	0.879586	0.767348
Vc31a324.32	F3H	F3H(Vc31a324.32)	F3H(Vc31a324.32)	Vc31a324.32	23	Vc31a324.32	F3H	302.173	281.566	284.001	218.876	188.113	212.882	2.47541	2.52926	2.39689
Vc32a323.35	F3H	F3H(Vc32a323.35)	F3H(Vc32a323.35)	Vc32a323.35	23	Vc32a323.35	F3H	163.604	152.139	160.118	2.03857	1.01932	1.60672	0.353592	0.396834	0.281285
Vc42p20.3	F3H	F3H(Vc42p20.3)	F3H(Vc42p20.3)	Vc42p20.3	23	Vc42p20.3	F3H	134.956	131.495	136.163	2.15712	2.07279	1.68594	0.5609	0.451837	0.150716
Vc13a238.27	F3'H	F3'H(Vc13a238.27)	F3'H(Vc13a238.27)	Vc13a238.27	24	Vc13a238.27	F3'H	23.9417	23.8226	24.5938	0.386616	0.226329	0.286094	0.0894705	0.180184	0.345591
Vc32a159.26	F3'H	F3'H(Vc32a159.26)	F3'H(Vc32a159.26)	Vc32a159.26	24	Vc32a159.26	F3'H	515.857	471.517	486.868	38.6973	36.7942	31.2907	10.5935	8.36176	8.14053
Vc42a154.36	F3'H	F3'H(Vc42a154.36)	F3'H(Vc42a154.36)	Vc42a154.36	24	Vc42a154.36	F3'H	605.994	559.68	560.449	6.37906	6.7861	5.83118	4.22001	3.85498	2.37942
Vc10a348.25	F3'5'H	F3'5'H(Vc10a348.25)	F3'5'H(Vc10a348.25)	Vc10a348.25	25	Vc10a348.25	F3'5'H	3143.45	3025.5	3105.37	2516.4	2512.52	2868.74	3.23461	3.05614	5.16723
Vc21p326.1	F3'5'H	F3'5'H(Vc21p326.1)	F3'5'H(Vc21p326.1)	Vc21p326.1	25	Vc21p326.1	F3'5'H	11.0942	13.3175	10.8542	0	0	0.0358631	0	0	0
Vc5a37.39	F3'5'H	F3'5'H(Vc5a37.39)	F3'5'H(Vc5a37.39)	Vc5a37.39	25	Vc5a37.39	F3'5'H	165.641	109.89	112.087	94.9351	92.9761	94.6063	0.546378	0.0776715	0.165166
Vc8a360.23	F3'5'H	F3'5'H(Vc8a360.23)	F3'5'H(Vc8a360.23)	Vc8a360.23	25	Vc8a360.23	F3'5'H	1907.68	2026.77	1944.48	1706.35	1623.17	1846.25	0.795489	1.17519	1.21021
Vc8a361.35	F3'5'H	F3'5'H(Vc8a361.35)	F3'5'H(Vc8a361.35)	Vc8a361.35	25	Vc8a361.35	F3'5'H	28.8067	26.0537	26.3976	15.2439	16.5034	16.4131	0.0447116	0.0423738	0.120142
Vc13p166.8	DFR	DFR(Vc13p166.8)	DFR(Vc13p166.8)	Vc13p166.8	26	Vc13p166.8	DFR	71.6339	57.7543	61.9394	9.53476	10.6696	12.1437	0.320484	0.432811	0.645866
Vc32p199.0	DFR	DFR(Vc32p199.0)	DFR(Vc32p199.0)	Vc32p199.0	26	Vc32p199.0	DFR	311.146	307.36	300.884	65.4526	58.2562	70.6827	4.43633	5.55638	5.20926
Vc42p96.9	DFR	DFR(Vc42p96.9)	DFR(Vc42p96.9)	Vc42p96.9	26	Vc42p96.9	DFR	4.46074	4.55351	5.39879	0.827215	1.09586	1.87328	1.16859	1.19128	0.883142
Vc38s37.48	ANS	ANS(Vc38s37.48)	ANS(Vc38s37.48)	Vc38s37.48	27	Vc38s37.48	ANS	0.606528	0.769817	0.717545	0.0318857	0.00649258	0.113257	3.75836	4.25184	3.63837
Vc22a131.24	LDOX	ANS(Vc22a131.24)	LDOX(Vc22a131.24)	Vc22a131.24	27	Vc22a131.24	LDOX	2265.02	2063.16	2046.51	5.71959	3.95055	0.632235	0.860448	1.15812	0.221368
Vc46a11.23	LDOX	ANS(Vc46a11.23)	LDOX(Vc46a11.23)	Vc46a11.23	27	Vc46a11.23	LDOX	564.347	544.566	564.308	1.53806	0.888123	0.32276	0.177083	0.251736	0.124905
Vc14a326.39	BZ1	BZ1(Vc14a326.39)	BZ1(Vc14a326.39)	Vc14a326.39	28	Vc14a326.39	BZ1	0.925228	0.613703	0.360764	0.720566	0.757664	1.08391	8.52902	7.69446	7.3271
Vc14s307.43	BZ1	BZ1(Vc14s307.43)	BZ1(Vc14s307.43)	Vc14s307.43	28	Vc14s307.43	BZ1	0.014055	0	0	0	0	0	3.02314	2.39124	2.24953
Vc15a348.41	BZ1	BZ1(Vc15a348.41)	BZ1(Vc15a348.41)	Vc15a348.41	28	Vc15a348.41	BZ1	11.0533	11.0329	10.97	0.563774	0.463213	1.27353	0.137335	0.466387	0.507411
Vc18a76.26	BZ1	BZ1(Vc18a76.26)	BZ1(Vc18a76.26)	Vc18a76.26	28	Vc18a76.26	BZ1	63.9731	58.5818	62.5032	29.9491	34.0874	17.2693	4.93032	5.5909	4.7392
Vc18a76.29	BZ1	BZ1(Vc18a76.29)	BZ1(Vc18a76.29)	Vc18a76.29	28	Vc18a76.29	BZ1	31.3069	28.6385	28.8521	15.3256	14.3164	11.111	6.0639	6.612	5.57746
Vc200s1.44	BZ1	BZ1(Vc200s1.44)	BZ1(Vc200s1.44)	Vc200s1.44	28	Vc200s1.44	BZ1	0.0444681	0.194324	0.119243	0	0	0	2.46886	3.12616	2.19118
Vc20a45.21	BZ1	BZ1(Vc20a45.21)	BZ1(Vc20a45.21)	Vc20a45.21	28	Vc20a45.21	BZ1	6.69232	6.70429	6.71194	8.24533	8.78108	4.92562	0.217917	0.242019	0.301925
Vc24a46.35	BZ1	BZ1(Vc24a46.35)	BZ1(Vc24a46.35)	Vc24a46.35	28	Vc24a46.35	BZ1	44.2349	42.4028	41.4556	1.94884	1.8655	3.76208	1.33993	1.30084	1.11965
Vc2a358.33	BZ1	BZ1(Vc2a358.33)	BZ1(Vc2a358.33)	Vc2a358.33	28	Vc2a358.33	BZ1	0.0115221	0	0.0132416	0.0164757	0	0.0243839	1.57596	1.24664	1.49836
Vc2p377.22	BZ1	BZ1(Vc2p377.22)	BZ1(Vc2p377.22)	Vc2p377.22	28	Vc2p377.22	BZ1	0.436194	0.312215	0.190145	0.0215078	0	0.0318313	3.18549	2.29958	2.79188
Vc3a32.25	BZ1	BZ1(Vc3a32.25)	BZ1(Vc3a32.25)	Vc3a32.25	28	Vc3a32.25	BZ1	1.1244	1.04414	1.11453	0.110537	0.0613844	0.148721	2.93012	3.1075	3.34306
Vc43a85.25	BZ1	BZ1(Vc43a85.25)	BZ1(Vc43a85.25)	Vc43a85.25	28	Vc43a85.25	BZ1	120.437	131.651	123.036	275.76	248.921	236.235	0.25649	0.557653	0.623321
Vc7a85.37	BZ1	BZ1(Vc7a85.37)	BZ1(Vc7a85.37)	Vc7a85.37	28	Vc7a85.37	BZ1	13.2591	14.8279	13.8284	8.60293	7.40966	6.11379	4.37409	3.89966	3.317
Vc8a233.19	BZ1	BZ1(Vc8a233.19)	BZ1(Vc8a233.19)	Vc8a233.19	28	Vc8a233.19	BZ1	0.631372	0.464268	0.879087	0.0173618	0.0795426	0.141324	1.82143	2.20852	1.63292
Vc8a233.20	BZ1	BZ1(Vc8a233.20)	BZ1(Vc8a233.20)	Vc8a233.20	28	Vc8a233.20	BZ1	12.0557	12.3516	12.2767	22.1658	23.2355	21.9474	2.34178	2.01457	1.70421
Vc14a56.20	AT	5MaT2(Vc14a56.20)	AT(Vc14a56.20)	Vc14a56.20	29	Vc14a56.20	AT	15.4877	13.0624	8.42953	7.75024	7.83385	9.80812	0	0	0.0144293
Vc18a312.31	AT	AT(Vc18a312.31)	AT(Vc18a312.31)	Vc18a312.31	29	Vc18a312.31	AT	3.07972	2.73929	3.28875	0.0194857	0.0396769	0.0144193	0	0	0
Vc2a9.31	AT	5MaT2(Vc2a9.31)	AT(Vc2a9.31)	Vc2a9.31	29	Vc2a9.31	AT	40.9332	47.3043	63.9334	25.7217	22.705	27.2671	0.0381022	0.0135412	0.0191967
Vc6p79.11	AT	5MaT2(Vc6p79.11)	AT(Vc6p79.11)	Vc6p79.11	29	Vc6p79.11	AT	16.0754	15.3022	17.0207	22.5721	21.1201	20.1053	7.00555	6.79766	7.84994
Vc7p347.2	AT	AT(Vc7p347.2)	AT(Vc7p347.2)	Vc7p347.2	29	Vc7p347.2	AT	1.25428	1.93453	1.63225	0	0.0134265	0	0	0	0
Vc7p347.6	AT	AT(Vc7p347.6)	AT(Vc7p347.6)	Vc7p347.6	29	Vc7p347.6	AT	0.504432	0.846314	0.559008	0.425052	0.603223	0.228754	3.7359	3.3334	2.46291
Vc10p159.9	UGAT	UGAT(Vc10p159.9)	UGAT(Vc10p159.9)	Vc10p159.9	29	Vc10p159.9	UGAT	5.53658	6.08996	6.8406	5.47158	5.36432	5.69851	1.02132	1.20003	1.00812
Vc1p272.1	UGAT	UGAT(Vc1p272.1)	UGAT(Vc1p272.1)	Vc1p272.1	29	Vc1p272.1	UGAT	3.53359	2.80758	3.32258	2.05353	2.84721	2.09945	0.43771	0.57779	0.609075
Vc28s280.49	UGAT	UGAT(Vc28s280.49)	UGAT(Vc28s280.49)	Vc28s280.49	29	Vc28s280.49	UGAT	9.73216	9.84531	10.1132	0	0	0	1.65154	1.29571	0.910577
Vc5p252.2	UGAT	UGAT(Vc5p252.2)	UGAT(Vc5p252.2)	Vc5p252.2	29	Vc5p252.2	UGAT	13.7476	12.3795	13.453	24.3181	22.0044	21.9788	0.061979	0.073423	0.0416351
Vc36p224.30	UGT75C1	UGT75C1(Vc36p224.30)	UGT75C1(Vc36p224.30)	Vc36p224.30	29	Vc36p224.30	UGT75C1	3.26332	4.03372	3.236	1.18658	1.45238	1.67719	0.43195	0.321644	0.310894
Vc36p225.11	UGT75C1	UGT75C1(Vc36p225.11)	UGT75C1(Vc36p225.11)	Vc36p225.11	29	Vc36p225.11	UGT75C1	4.59373	4.52743	4.91984	0	0	0	0	0	0
Vc36s226.33	UGT75C1	UGT75C1(Vc36s226.33)	UGT75C1(Vc36s226.33)	Vc36s226.33	29	Vc36s226.33	UGT75C1	3.4154	3.21199	3.21696	0.138457	0.192223	0.55886	1.55354	1.80818	1.48714
Vc4p123.16	UGT75C1	UGT75C1(Vc4p123.16)	UGT75C1(Vc4p123.16)	Vc4p123.16	29	Vc4p123.16	UGT75C1	2.88929	2.37738	2.12258	0	0	0	0	0	0
Vc9p80.14	UGT75C1	UGT75C1(Vc9p80.14)	UGT75C1(Vc9p80.14)	Vc9p80.14	29	Vc9p80.14	UGT75C1	9.51692	8.5105	8.65052	2.02651	1.44834	2.22458	1.07667	1.14793	0.959721
Vc38p219.4	3GGT	3GGT(Vc38p219.4)	3GGT(Vc38p219.4)	Vc38p219.4	30	Vc38p219.4	3GGT	0	0	0	0.00661538	0.00673514	0	4.57238	3.61995	5.48147
Vc13a26.16	GSTF	GSTF(Vc13a26.16)	GSTF(Vc13a26.16)	Vc13a26.16	36	Vc13a26.16	GSTF	564.881	534.895	559.078	0.199985	0.183245	0.0295975	0.0617072	0.0657909	0
Vc24a11.46	GSTF	GSTF(Vc24a11.46)	GSTF(Vc24a11.46)	Vc24a11.46	36	Vc24a11.46	GSTF	4.57173	5.95245	5.01409	0.074626	0.303908	0.132535	1.4737	2.04587	1.57777
Vc30a282.25	GSTF	GSTF(Vc30a282.25)	GSTF(Vc30a282.25)	Vc30a282.25	36	Vc30a282.25	GSTF	1715.02	1718.26	1747.79	1.58946	1.12786	0.16633	0.520166	0.545786	0.0499181
Vc42a34.23	GSTF	GSTF(Vc42a34.23)	GSTF(Vc42a34.23)	Vc42a34.23	36	Vc42a34.23	GSTF	94.3865	105.992	117.86	0.0582083	0.039508	0	0	0.0425541	0
Vc11a361.31	ABCC2	ABCC2(Vc11a361.31)	ABCC2(Vc11a361.31)	Vc11a361.31	37	Vc11a361.31	ABCC2	0.14004	0.157928	0.223238	0.200247	0.197295	0.152962	2.05794	2.05777	2.20421
Vc15a354.37	ABCC2	ABCC2(Vc15a354.37)	ABCC2(Vc15a354.37)	Vc15a354.37	37	Vc15a354.37	ABCC2	0.675363	0.716128	0.753324	0.550318	0.502445	0.635808	4.90246	5.08479	5.19382
Vc20p342.1	ABCC2	ABCC2(Vc20p342.1)	ABCC2(Vc20p342.1)	Vc20p342.1	37	Vc20p342.1	ABCC2	0.437481	0.471486	0.45521	0.0338143	0.0946728	0.0500448	4.04959	3.97691	4.00826
Vc24a40.32	ABCC2	ABCC2(Vc24a40.32)	ABCC2(Vc24a40.32)	Vc24a40.32	37	Vc24a40.32	ABCC2	0.412913	0.322217	0.443247	0.285485	0.353408	0.326489	2.54257	3.18399	3.20755
Vc28a32.42	ABCC2	ABCC2(Vc28a32.42)	ABCC2(Vc28a32.42)	Vc28a32.42	37	Vc28a32.42	ABCC2	0.475889	0.840312	0.756769	0.0356068	0.0765308	0.0468424	9.45477	9.5707	9.67463
Vc44a24.29	ABCC2	ABCC2(Vc44a24.29)	ABCC2(Vc44a24.29)	Vc44a24.29	37	Vc44a24.29	ABCC2	0.180549	0.146346	0.147254	0.0291484	0.0084789	0.0184883	1.32983	1.03199	1.17169
Vc49s37.45	ABCC2	ABCC2(Vc49s37.45)	ABCC2(Vc49s37.45)	Vc49s37.45	37	Vc49s37.45	ABCC2	0.167791	0.34829	0.269964	0.0119964	0.0284985	0.0473456	1.58553	1.53478	1.48575
Vc80a1.33	ABCC2	ABCC2(Vc80a1.33)	ABCC2(Vc80a1.33)	Vc80a1.33	37	Vc80a1.33	ABCC2	7.60868	7.27337	7.49411	5.33441	4.80632	5.76644	0.614983	0.411408	0.443498
Vc80s0.26	ABCC2	ABCC2(Vc80s0.26)	ABCC2(Vc80s0.26)	Vc80s0.26	37	Vc80s0.26	ABCC2	1.99509	2.04228	1.77145	0.730794	0.668428	0.688271	0.0542632	0.0471405	0.0243013
Vc338a0.23	ABCG2	ABCG2(Vc338a0.23)	ABCG2(Vc338a0.23)	Vc338a0.23	37	Vc338a0.23	ABCG2	0	0	0	0	0	0	4.24541	6.31356	4.43063
Vc33a81.36	ABCG2	ABCG2(Vc33a81.36)	ABCG2(Vc33a81.36)	Vc33a81.36	37	Vc33a81.36	ABCG2	7.24582	6.97454	6.37674	1.00592	0.652884	2.66114	18.2255	19.8832	17.4363
Vc38a182.23	ABCG2	ABCG2(Vc38a182.23)	ABCG2(Vc38a182.23)	Vc38a182.23	37	Vc38a182.23	ABCG2	0.17161	0.318721	0.226804	3.52748	2.4546	2.95079	80.8946	85.3567	81.9228
Vc6a65.19	ABCG2	ABCG2(Vc6a65.19)	ABCG2(Vc6a65.19)	Vc6a65.19	37	Vc6a65.19	ABCG2	0	0	0	0	0	0	3.7122	3.87871	3.95253
Vc6s187.23	ABCG2	ABCG2(Vc6s187.23)	ABCG2(Vc6s187.23)	Vc6s187.23	37	Vc6s187.23	ABCG2	0.0594174	0.119007	0.0341423	0.72218	0.410878	0.639196	26.1286	27.3919	28.3975
Vc14a186.29	MATE	MATE(Vc14a186.29)	MATE(Vc14a186.29)	Vc14a186.29	38	Vc14a186.29	MATE	1.95708	1.91563	1.97613	1.16468	1.12813	1.18506	0.0124783	0	0.0125736
Vc14p264.25	MATE	MATE(Vc14p264.25)	MATE(Vc14p264.25)	Vc14p264.25	38	Vc14p264.25	MATE	57.4627	57.8521	59.3308	77.8774	83.4521	81.7768	1.32012	2.15943	1.91331
Vc15a107.18	MATE	MATE(Vc15a107.18)	MATE(Vc15a107.18)	Vc15a107.18	38	Vc15a107.18	MATE	42.4517	40.9116	43.4567	30.0002	25.8034	27.0896	4.36002	4.73812	4.27905
Vc21p311.0	MATE	MATE(Vc21p311.0)	MATE(Vc21p311.0)	Vc21p311.0	38	Vc21p311.0	MATE	6.08504	6.73401	7.03846	0	0	0	0.681354	0.958289	0.62813
Vc24a293.28	MATE	MATE(Vc24a293.28)	MATE(Vc24a293.28)	Vc24a293.28	38	Vc24a293.28	MATE	8.39462	7.24781	6.44409	6.3165	5.3274	5.86428	0.359597	0.127798	0.235524
Vc24a293.29	MATE	MATE(Vc24a293.29)	MATE(Vc24a293.29)	Vc24a293.29	38	Vc24a293.29	MATE	29.0128	27.2357	25.8401	24.1419	20.5142	18.6411	1.20432	1.54261	1.6686
Vc25a304.42	MATE	MATE(Vc25a304.42)	MATE(Vc25a304.42)	Vc25a304.42	38	Vc25a304.42	MATE	19.0666	19.5692	20.4177	25.8432	27.0024	26.0035	0.709103	0.61857	0.649565
Vc28s206.51	MATE	MATE(Vc28s206.51)	MATE(Vc28s206.51)	Vc28s206.51	38	Vc28s206.51	MATE	9.05792	7.86279	7.93173	5.63137	6.29232	8.1781	1.14031	0.733323	1.45543
Vc29p292.3	MATE	MATE(Vc29p292.3)	MATE(Vc29p292.3)	Vc29p292.3	38	Vc29p292.3	MATE	41.2324	42.1261	41.8771	1.00478	0.895101	1.03564	1.02422	1.3773	1.14362
Vc2a302.44	MATE	MATE(Vc2a302.44)	MATE(Vc2a302.44)	Vc2a302.44	38	Vc2a302.44	MATE	16.635	15.5252	19.5979	24.1156	22.7572	27.8627	0.291989	0.218464	1.28528
Vc2a421.33	MATE	MATE(Vc2a421.33)	MATE(Vc2a421.33)	Vc2a421.33	38	Vc2a421.33	MATE	2.2718	2.64639	1.96599	0.29354	0.268968	0.347549	4.43815	4.53872	4.95882
Vc35s82.35	MATE	MATE(Vc35s82.35)	MATE(Vc35s82.35)	Vc35s82.35	38	Vc35s82.35	MATE	33.1504	37.7066	33.5915	2.22719	2.74132	2.77145	1.17956	1.60392	1.39528
Vc36s112.31	MATE	MATE(Vc36s112.31)	MATE(Vc36s112.31)	Vc36s112.31	38	Vc36s112.31	MATE	0.45116	0.380228	0.607373	1.05063	1.00397	1.26849	4.39353	4.48721	4.84259
Vc38a171.30	MATE	MATE(Vc38a171.30)	MATE(Vc38a171.30)	Vc38a171.30	38	Vc38a171.30	MATE	0	0	0	0	0	0	2.27405	2.29393	1.57391
Vc38p71.5	MATE	MATE(Vc38p71.5)	MATE(Vc38p71.5)	Vc38p71.5	38	Vc38p71.5	MATE	1.87536	2.36089	2.35505	3.64949	3.25451	3.50882	0.0821962	0.0194746	0.0690202
Vc39p75.3	MATE	MATE(Vc39p75.3)	MATE(Vc39p75.3)	Vc39p75.3	38	Vc39p75.3	MATE	45.309	42.8658	44.919	48.0689	58.0535	49.3781	0.0997229	0.106322	0.20097
Vc3s104.28	MATE	MATE(Vc3s104.28)	MATE(Vc3s104.28)	Vc3s104.28	38	Vc3s104.28	MATE	33.0924	34.9636	32.3996	56.795	57.0113	48.7166	0.864222	1.70748	1.00366
Vc4a170.22	MATE	MATE(Vc4a170.22)	MATE(Vc4a170.22)	Vc4a170.22	38	Vc4a170.22	MATE	107.057	98.0476	97.2492	11.7843	20.5873	15.9036	2.64833	1.88239	1.5878
Vc4a293.24	MATE	MATE(Vc4a293.24)	MATE(Vc4a293.24)	Vc4a293.24	38	Vc4a293.24	MATE	4.24437	4.06527	3.97573	0.0207847	0.063483	0.184567	72.3103	68.0356	54.2513
Vc597s0.19	MATE	MATE(Vc597s0.19)	MATE(Vc597s0.19)	Vc597s0.19	38	Vc597s0.19	MATE	0.552291	1.53289	0.531786	0.405539	0.521534	0.600194	4.85714	3.73326	5.49152
Vc6p347.2	MATE	MATE(Vc6p347.2)	MATE(Vc6p347.2)	Vc6p347.2	38	Vc6p347.2	MATE	4.06884	4.83171	4.03903	4.86531	6.0179	5.70308	0.065045	0.0924661	0.0393252
Vc9s122.24	MATE	MATE(Vc9s122.24)	MATE(Vc9s122.24)	Vc9s122.24	38	Vc9s122.24	MATE	15.8693	17.9248	17.0988	2.99591	4.771	4.13432	0.640221	0.754733	1.05421
Vc17s6.46	VSR1	VSR1(Vc17s6.46)	VSR1(Vc17s6.46)	Vc17s6.46	39	Vc17s6.46	VSR1	5.34671	5.01022	4.85236	4.05915	3.61907	5.06263	28.8316	26.8891	26.6748
Vc1s253.39	VSR1	VSR1(Vc1s253.39)	VSR1(Vc1s253.39)	Vc1s253.39	39	Vc1s253.39	VSR1	1.27497	0.89054	1.60936	0.515552	0.859595	0.552907	5.48706	4.41632	4.49521
Vc45p63.1	VSR1	VSR1(Vc45p63.1)	VSR1(Vc45p63.1)	Vc45p63.1	39	Vc45p63.1	VSR1	2.94081	3.42867	1.21389	1.18439	1.33306	1.36693	10.6536	6.75022	7.41566
Vc37a81.25	FLS	FLS(Vc37a81.25)	FLS(Vc37a81.25)	Vc37a81.25	40	Vc37a81.25	FLS	29.1722	30.3849	27.9833	0.0129628	0.0131974	0	0.0799957	0.11372	0.0403035
Vc38a200.23	FLS	FLS(Vc38a200.23)	FLS(Vc38a200.23)	Vc38a200.23	40	Vc38a200.23	FLS	79.1733	82.4412	81.2501	0.0625896	0.0892117	0.0185264	0.231751	0.329451	0.0389204
Vc39a226.23	FLS	FLS(Vc39a226.23)	FLS(Vc39a226.23)	Vc39a226.23	40	Vc39a226.23	FLS	4.77326	5.15745	5.40523	0	0.0254541	0.0740039	0	0.0822499	0.038867
Vc6a163.26	FLS	FLS(Vc6a163.26)	FLS(Vc6a163.26)	Vc6a163.26	40	Vc6a163.26	FLS	44.472	45.6859	44.4268	0.187255	0.266902	0.184757	0.192597	0.191654	0.25229
Vc28s280.45	C12RT1	C12RT1(Vc28s280.45)	C12RT1(Vc28s280.45)	Vc28s280.45	43	Vc28s280.45	C12RT1	0	0	0	0	0	0.00758016	1.75421	1.26933	1.17841
Vc28s281.34	C12RT1	C12RT1(Vc28s281.34)	C12RT1(Vc28s281.34)	Vc28s281.34	43	Vc28s281.34	C12RT1	5.7452	5.87731	5.24175	2.02767	1.85156	1.99547	1.70927	1.67339	2.06355
Vc20a68.33	F3GalT	F3GalT(Vc20a68.33)	F3GalT(Vc20a68.33)	Vc20a68.33	43	Vc20a68.33	F3GalT	13.9862	15.8692	14.8015	2.38368	1.85285	1.94689	1.6938	2.11501	1.52223
Vc20a68.35	F3GalT	F3GalT(Vc20a68.35)	F3GalT(Vc20a68.35)	Vc20a68.35	43	Vc20a68.35	F3GalT	1.27935	1.04405	1.34627	0.0661218	0.056099	0.0326199	0.136017	0.229612	0.0685281
Vc28a290.32	F3GalT	F3GalT(Vc28a290.32)	F3GalT(Vc28a290.32)	Vc28a290.32	43	Vc28a290.32	F3GalT	6.85584	6.78567	6.36198	4.57977	4.98296	2.49032	0	0	0
Vc28a290.34	F3GalT	F3GalT(Vc28a290.34)	F3GalT(Vc28a290.34)	Vc28a290.34	43	Vc28a290.34	F3GalT	396.021	355.268	338.371	54.4403	44.0205	43.8104	2.93958	1.42231	1.21337
Vc37a300.34	F3GalT	F3GalT(Vc37a300.34)	F3GalT(Vc37a300.34)	Vc37a300.34	43	Vc37a300.34	F3GalT	186.578	192.929	192.605	0.81568	0.290656	0.446663	0	0.0536684	0.0126805
Vc39p2.0	F3GalT	F3GalT(Vc39p2.0)	F3GalT(Vc39p2.0)	Vc39p2.0	43	Vc39p2.0	F3GalT	496.18	501.348	509.326	1.52378	0.713818	0.124519	0.100958	0.0717596	0.0290656
Vc48s55.35	F3GalT	F3GalT(Vc48s55.35)	F3GalT(Vc48s55.35)	Vc48s55.35	43	Vc48s55.35	F3GalT	5.98265	5.59563	5.83721	0.961264	0.724939	0.526912	0.360951	0.150589	0.150228
Vc13a19.21	FG2	FG2(Vc13a19.21)	FG2(Vc13a19.21)	Vc13a19.21	43	Vc13a19.21	FG2	0	0	0	0	0	0.0187451	2.38395	2.98617	2.63845
Vc13s19.30	FG2	FG2(Vc13s19.30)	FG2(Vc13s19.30)	Vc13s19.30	43	Vc13s19.30	FG2	0.0716122	0.199936	0.137166	0.216178	0.098462	0.0841951	1.38674	1.15411	1.55652
Vc42a40.30	FG2	FG2(Vc42a40.30)	FG2(Vc42a40.30)	Vc42a40.30	43	Vc42a40.30	FG2	0	0	0	0	0	0	2.34487	1.61115	2.24465
Vc29p50.1	GT1	GT1(Vc29p50.1)	GT1(Vc29p50.1)	Vc29p50.1	43	Vc29p50.1	GT1	0.791003	0.412442	0.743768	0.141384	0.0523433	0.0951125	2.00281	1.88869	2.79739
Vc11p337.3	UGT73C6	UGT73C6(Vc11p337.3)	UGT73C6(Vc11p337.3)	Vc11p337.3	43	Vc11p337.3	UGT73C6	12.2568	11.6608	13.1456	5.0366	5.15368	5.60941	3.41429	4.10051	2.70881
Vc14s6.29	UGT73C6	UGT73C6(Vc14s6.29)	UGT73C6(Vc14s6.29)	Vc14s6.29	43	Vc14s6.29	UGT73C6	0	0	0	0	0	0.0127807	1.7853	2.55687	2.98034
Vc2p285.2	UGT73C6	UGT73C6(Vc2p285.2)	UGT73C6(Vc2p285.2)	Vc2p285.2	43	Vc2p285.2	UGT73C6	6.17679	6.0495	5.28485	2.06218	2.46593	2.89364	0.10505	0.128003	0.0604875
Vc30s175.29	UGT73C6	UGT73C6(Vc30s175.29)	UGT73C6(Vc30s175.29)	Vc30s175.29	43	Vc30s175.29	UGT73C6	4.28722	4.60602	4.39548	0.915745	0.543856	1.22353	2.06035	1.47841	1.2852
Vc32p137.5	UGT73C6	UGT73C6(Vc32p137.5)	UGT73C6(Vc32p137.5)	Vc32p137.5	43	Vc32p137.5	UGT73C6	3.06425	3.57782	3.25743	0.657247	0.627324	0.648479	0.676	0.690705	0.787597
Vc36p99.0	UGT73C6	UGT73C6(Vc36p99.0)	UGT73C6(Vc36p99.0)	Vc36p99.0	43	Vc36p99.0	UGT73C6	4.38715	4.6819	4.45788	2.28891	2.45364	2.06121	0.710002	0.332012	0.338886
Vc3p423.0	UGT73C6	UGT73C6(Vc3p423.0)	UGT73C6(Vc3p423.0)	Vc3p423.0	43	Vc3p423.0	UGT73C6	0	0	0	0	0	0.015531	45.4458	52.13	45.9562
Vc43p85.5	UGT73C6	UGT73C6(Vc43p85.5)	UGT73C6(Vc43p85.5)	Vc43p85.5	43	Vc43p85.5	UGT73C6	2.83443	2.80603	2.9867	1.62447	1.01777	1.25436	0.0167641	0.0714939	0.0168922
Vc8p226.3	UGT73C6	UGT73C6(Vc8p226.3)	UGT73C6(Vc8p226.3)	Vc8p226.3	43	Vc8p226.3	UGT73C6	0.0355043	0	0	0	0	0	5.11075	5.27499	5.44577
Vc9p318.12	UGT73C6	UGT73C6(Vc9p318.12)	UGT73C6(Vc9p318.12)	Vc9p318.12	43	Vc9p318.12	UGT73C6	9.22421	7.75494	9.38989	2.88117	2.47584	3.12962	0.530145	0.681174	1.10948
Vc19a256.19	ANR	ANR(Vc19a256.19)	ANR(Vc19a256.19)	Vc19a256.19	45	Vc19a256.19	ANR	0.327049	0.10719	0	0.0116914	0.0833215	0.0519095	1.91197	2.56416	2.23556

## Sheet: Table 7_DEMs
DEMs	Ex	Sa	Se
L-Phenylalanine	2371.93	4032	37517
Cinnamic acid	13755.6	1710.22	1758.24
p-Coumaric acid	152887	15801.9	34296.7
trans-Caffeate	75439	10987.9	13056.2
Caffeic acid	296346	291948	28928.1
5-Hydroxyferulate	34051.4	6279.39	12881.4
Cinnamaldehyde	8780.68	904.566	904.963
p-Coumaraldehyde	3694.52	8000.97	43410.2
Sinapaldehyde	32607.6	144135	203482
Sinapyl alcohol	11522.1	21239.4	286330
Chlorogenate	25198.1	5036.96	9278.35
Desmethylxanthohumol	104600	118396	9549.79
Phlorizin	12814.2	1316.06	3008.8
PHC 4'-O-glucoside	87897.3	8418.88	16454.6
Bracteatin 6-O-glucoside	18144.8	3357.31	2797.56
Naringenin	1266.99	3376.76	16840.1
Hesperetin 7-O-glucoside	122764	14908.2	2586.68
Naringenin 7-O-glucoside	34176.4	5486.89	1037.7
2'-Hydroxybiochanin A	58496.3	9330.09	5523.58
Biochanin A 7-O-(6-O-mal-glu)	747175	1185.2	36082.4
Formononetin 7-O-glucoside	2940.84	11816.3	80556.2
Genistein 7-glucoside	2190.5	5451.61	69102.2
Malonylgenistin	32854.3	903.642	2364.3
Malonylglycitin	145958	1276.5	6152.86
Pratensein	24109.3	2225.74	2657.84
Glyceocarpin	3550.45	2852.76	16902.5
Maackiain-3-O-gyl-6''-O-malonate	258139	2560.87	10145.8
Medicarpin 3-O-glu-6'-malonate	4614.02	8641.13	28648.8
(-)-Vestitol	23687.9	54058.3	101221
DMI	77974	6885.61	19262.4
(+)-Sophorol	56318	1523.48	3124.51
Dihydroquercetin	1050.89	2304.73	4410.62
Dihydromyricetin	10809.2	3217.82	2615.93
Leucodelphinidin	85614.6	35717.6	15392
Delphinidin 3-O-glucoside	55902.9	2402.69	5353.56
Cyanidin 3-O-glucoside	10380.1	2168.69	2085.64
Albireodelphin	14406.9	4836.64	36261.7
Delphinidin 3,5-diglucoside	24815.5	10246.1	71006.8
Delphinidin 3-O-rutinoside	7644.88	878.25	2581.57
Delphinidin 3-O-(6-caf-glucoside)	23375	1334.92	1325.43
Delphinidin 3-O-sophoroside	11682.4	6756.79	1297.26
Delphinidin 3-glu 5-caf-glu	4013.12	373.676	1221.93
Cyanidin tri-O-glucoside	10295.2	5517.91	106517
Pelargonidin 3-O-(6-O-mal-glu)	7644.28	1363.09	1886.35
Pg 3-O-glu 5-O-(6-cou-glu)	14390.5	1488.02	3914.66
Pelargonidin 5-O-glu 3-O-sam	2304.72	294.797	720.848
Peonidin 3-O-glucoside	224453	18362.2	3567.45
Kaempferol	37937.8	8085.64	2456.03
Quercetin	118628	22357	16754.9
Luteolin	71651.2	6979.34	19652.4
Rutin	27339.9	4179.31	3984.45
3'-O-Methylmyricetin	87108.3	9501.81	8980.12
3-O-Methylquercetin	291713	67392.5	93792.1
Chrysoeriol	72002	12667.7	4836.93
Di-O-methylquercetin	532309	10118.3	34736.9
Kaempferide	132341	13048.6	7054.49
Syringetin	608036	37648.2	14367.4
Tri-O-methylquercetin	4344.59	1952.72	32581.6
Apigenin 7-glucoside	32811.8	1105.36	1959
Isoswertisin 2''-rhamnoside	2033.81	3160.89	12732.8
Isovitexin	15871.3	1263.36	1356.51
Isovitexin 2''-O-glucoside	23314.2	4512.23	7441.07
Kaempferol 3-O-galactoside	101148	10887.9	17845.6
Kaempferol 3-O-glucoside	97220	13176.4	14761.9
Kaempferol 3-sophorotrioside	10048.6	959.116	3464.16
Luteolin 7-O-glucoside	155798	17067.1	46624
Quercetin 3-L-rhamnoside	192389	12999	16989.1
Quercetin 3-O-(6-O-mal-glu)	18972.6	471.572	984.306
Quercetin 3-O-rha-7-O-glu	13307.2	1352.47	428.166
Scolymoside	14202.9	751.912	537.457
Vitexin 2''-O-glucoside	60536.7	5405.36	1271.52
(-)-Epiafzelechin	69354.4	3303	13878.6
(-)-Epicatechin	34498	21851.1	262928
(-)-Epigallocatechin	2314.26	1478.92	143011
(+)-Gallocatechin	166929	9628.14	19388.3
Cinnamtannin	19176.8	1919.19	1847.02
Fisetinidol-(4β-8)-catechin-(6-4β)-fisetinidol	21198.4	4523.7	5705.37
Gambiriin C	1114.05	403.854	3268.86
