# Supplementary material for: Integrated Untargeted Metabolome, Full-Length Sequencing and Transcriptome Analyses Reveal the Mechanism of Flavonoid Biosynthesis in Blueberry (Vaccinium spp.) Fruit
Source: Int J Mol Sci. 2024 Apr 9;25(8):4137. doi: 10.3390/ijms25084137 (PMC11050320; doi:10.3390/ijms25084137)
Supplement: Supplementary file 1 [file ijms-25-04137-s001.zip › Table S8. Promoter prediction and identification of DEFs.xlsx]

## Sheet: Table S8_Promoter
Table S8. Promoter prediction and identification of DEFs.
Sequence ID		TFBS ID	TFBS Name	Posistion	Strand	Binding sequence	TF family	TF ID
Vc9p318.12	UGT73C6(Vc9p318.12)	TFmatrixID_0002		684	-	ataAATTAat	AT-Hook	AT1G63480
Vc9p318.12	UGT73C6(Vc9p318.12)	TFmatrixID_0002		1507	+	gtTAATTttt	AT-Hook	AT1G63480
Vc9p318.12	UGT73C6(Vc9p318.12)	TFmatrixID_0005		744	-	tatTTAATtt	AT-Hook	AT4G14465
Vc9p318.12	UGT73C6(Vc9p318.12)	TFmatrixID_0005		1010	-	tatTTAATtg	AT-Hook	AT4G14465
Vc9p318.12	UGT73C6(Vc9p318.12)	TFmatrixID_0005		1067	-	tatTTAATct	AT-Hook	AT4G14465
Vc9p318.12	UGT73C6(Vc9p318.12)	TFmatrixID_0005		1352	-	aatTTAATtc	AT-Hook	AT4G14465
Vc9p318.12	UGT73C6(Vc9p318.12)	TFmatrixID_0005		1505	-	tagTTAATtt	AT-Hook	AT4G14465
Vc9p318.12	UGT73C6(Vc9p318.12)	TFmatrixID_0006		702	+	tATTATtatt	AT-Hook	AT4G14465
Vc9p318.12	UGT73C6(Vc9p318.12)	TFmatrixID_0007		744	-	tattTAATTt	AT-Hook	AT4G35390
Vc9p318.12	UGT73C6(Vc9p318.12)	TFmatrixID_0007		1010	-	tattTAATTg	AT-Hook	AT4G35390
Vc9p318.12	UGT73C6(Vc9p318.12)	TFmatrixID_0007		1352	-	aattTAATTc	AT-Hook	AT4G35390
Vc9p318.12	UGT73C6(Vc9p318.12)	TFmatrixID_0007		1505	-	tagtTAATTt	AT-Hook	AT4G35390
Vc9p318.12	UGT73C6(Vc9p318.12)	TFmatrixID_0008		515	-	gaaaATATTa	AT-Hook	AT4G35390
Vc9p318.12	UGT73C6(Vc9p318.12)	TFmatrixID_0008		1234	-	gaaaATATTt	AT-Hook	AT4G35390
Vc9p318.12	UGT73C6(Vc9p318.12)	TFmatrixID_0009		682	-	aAATAAatta	AT-Hook	AT4G35390
Vc9p318.12	UGT73C6(Vc9p318.12)	TFmatrixID_0012		1753	+	ggTACGTaaa	NAC; NAM	AT3G15500
Vc9p318.12	UGT73C6(Vc9p318.12)	TFmatrixID_0012		1753	-	ggtACGTAaa	NAC; NAM	AT3G15500
Vc9p318.12	UGT73C6(Vc9p318.12)	TFmatrixID_0013		1941	+	tgaACGCAaa	NAC; NAM	AT3G18400
Vc9p318.12	UGT73C6(Vc9p318.12)	TFmatrixID_0014		1253	-	gctTATCTtc	MYB; ARR-B	AT1G67710
Vc9p318.12	UGT73C6(Vc9p318.12)	TFmatrixID_0018		997	+	tgGGATCttt	Myb/SANT; MYB; ARR-B	AT2G01760
Vc9p318.12	UGT73C6(Vc9p318.12)	TFmatrixID_0020		448	+	acgCCGACac	AP2; ERF	AT1G77200
Vc9p318.12	UGT73C6(Vc9p318.12)	TFmatrixID_0025		1854	-	ccAATCAaac	Homeodomain; bZIP; HD-ZIP	AT3G61890
Vc9p318.12	UGT73C6(Vc9p318.12)	TFmatrixID_0028		424	+	ccgACGTCac	bZIP	AT1G42990
Vc9p318.12	UGT73C6(Vc9p318.12)	TFmatrixID_0029		785	-	gtGATATtta	MYB-related	AT2G46830
Vc9p318.12	UGT73C6(Vc9p318.12)	TFmatrixID_0029		1273	+	ttaATATCtc	MYB-related	AT2G46830
Vc9p318.12	UGT73C6(Vc9p318.12)	TFmatrixID_0029		1342	+	aaaATATCca	MYB-related	AT2G46830
Vc9p318.12	UGT73C6(Vc9p318.12)	TFmatrixID_0032		449	-	cgcCGACAca	AP2; ERF	AT1G12610
Vc9p318.12	UGT73C6(Vc9p318.12)	TFmatrixID_0034		420	+	cataCCGACg	AP2; ERF	AT2G23340
Vc9p318.12	UGT73C6(Vc9p318.12)	TFmatrixID_0035		448	+	acgCCGACac	AP2; ERF	AT4G36900
Vc9p318.12	UGT73C6(Vc9p318.12)	TFmatrixID_0038		448	+	acgCCGACac	AP2	AT2G40340
Vc9p318.12	UGT73C6(Vc9p318.12)	TFmatrixID_0040		448	-	acgCCGACac	B3; ARF	AT2G33860
Vc9p318.12	UGT73C6(Vc9p318.12)	TFmatrixID_0042		997	-	tggGATCTtt	GATA; tify	AT5G25830
Vc9p318.12	UGT73C6(Vc9p318.12)	TFmatrixID_0044		1025	+	aaaAATCTat	MYB; G2-like	AT2G20570
Vc9p318.12	UGT73C6(Vc9p318.12)	TFmatrixID_0044		1797	+	gaaAATCTcg	MYB; G2-like	AT2G20570
Vc9p318.12	UGT73C6(Vc9p318.12)	TFmatrixID_0048		698	-	cGAATAttat	Myb/SANT; MYB; G2-like	AT5G16560
Vc9p318.12	UGT73C6(Vc9p318.12)	TFmatrixID_0058		1950	+	aacaaATTATtctt	Homeodomain; bZIP; HD-ZIP	AT3G01470
Vc9p318.12	UGT73C6(Vc9p318.12)	TFmatrixID_0059		448	+	aCGCCGacac	AP2; ERF;ERF	AT1G03800;AT1G12980;AT1G24590;AT1G28360;AT1G28370;AT1G72360;AT5G44210;AT5G50080;AT5G64750;Glyma01g03110.1;Glyma02g04460.1;Glyma02g07460.1;Glyma02g08840.1;Glyma02g43500.1;Glyma02g46340.1;Glyma03g23330.1;Glyma03g31640.1;Glyma03g41640.1;Glyma04g39510.1;Glyma06g35710.1;Glyma06g44430.1;Glyma07g23240.1;Glyma07g33510.1;Glyma08g38800.1;Glyma08g43300.1;Glyma09g05840.1;Glyma09g05850.1;Glyma09g05860.1;Glyma…
Vc9p318.12	UGT73C6(Vc9p318.12)	TFmatrixID_0065		1543	+	aataCCAAAagaggggca	MADS box; MIKC	AT4G18960
Vc9p318.12	UGT73C6(Vc9p318.12)	TFmatrixID_0070		448	+	acgCCGACa	AP2; ERF;ERF	AT1G12630;AT1G77200;AT2G35700;AT2G36450;AT2G44940;AT4G25490;AT5G11590;AT5G25810;AT5G51990;Glyma01g13410.1;Glyma01g35010.1;Glyma01g42510.1;Glyma03g27050.1;Glyma03g34970.1;Glyma03g41910.1;Glyma04g08900.1;Glyma05g03540.1;Glyma05g04920.1;Glyma05g35740.1;Glyma06g08990.1;Glyma07g02000.1;Glyma07g06080.1;Glyma07g14560.1;Glyma08g03910.1;Glyma08g21650.1;Glyma09g27180.1;Glyma09g32730.1;Glyma10g07740.1;Glyma…
Vc9p318.12	UGT73C6(Vc9p318.12)	TFmatrixID_0080		421	+	ataCCGACgt	AP2; ERF;ERF	AT1G01250;AT1G77200;AT2G25820;AT2G35700;AT2G44940;AT3G16280;AT3G60490;AT4G16750;AT4G25490;AT5G11590;AT5G25810;AT5G51990;Glyma01g13410.1;Glyma01g35010.1;Glyma01g42510.1;Glyma03g27050.1;Glyma03g34970.1;Glyma03g41910.1;Glyma04g08900.1;Glyma05g03540.1;Glyma05g04920.1;Glyma05g35740.1;Glyma06g08990.1;Glyma07g02000.1;Glyma07g06080.1;Glyma07g14560.1;Glyma08g03910.1;Glyma08g21650.1;Glyma09g27180.1;Glyma09…
Vc9p318.12	UGT73C6(Vc9p318.12)	TFmatrixID_0080		448	+	acgCCGACac	AP2; ERF;ERF	AT1G01250;AT1G77200;AT2G25820;AT2G35700;AT2G44940;AT3G16280;AT3G60490;AT4G16750;AT4G25490;AT5G11590;AT5G25810;AT5G51990;Glyma01g13410.1;Glyma01g35010.1;Glyma01g42510.1;Glyma03g27050.1;Glyma03g34970.1;Glyma03g41910.1;Glyma04g08900.1;Glyma05g03540.1;Glyma05g04920.1;Glyma05g35740.1;Glyma06g08990.1;Glyma07g02000.1;Glyma07g06080.1;Glyma07g14560.1;Glyma08g03910.1;Glyma08g21650.1;Glyma09g27180.1;Glyma09…
Vc9p318.12	UGT73C6(Vc9p318.12)	TFmatrixID_0082		448	+	aCGCCGaca	AP2; ERF;ERF	AT1G04370;AT1G53910;AT3G23220;AT3G61630;AT4G17500;AT4G18450;AT4G34410;AT5G07310;AT5G50080;AT5G61590;AT5G61890;AT5G64750;Glyma01g41520.1;Glyma02g00870.1;Glyma02g00890.1;Glyma02g07310.1;Glyma02g08840.1;Glyma02g14940.1;Glyma02g46340.1;Glyma03g26310.1;Glyma03g26390.1;Glyma03g26450.1;Glyma03g26480.1;Glyma03g26520.1;Glyma03g26530.1;Glyma03g31920.1;Glyma03g31930.1;Glyma03g31940.1;Glyma04g37870.1;Glyma04…
Vc9p318.12	UGT73C6(Vc9p318.12)	TFmatrixID_0085		422	+	taCCGACgtc	AP2; ERF;ERF	AT1G12610;AT1G33760;AT1G63030;AT1G77200;AT2G35700;AT2G44940;AT3G16280;AT3G60490;AT4G25480;AT4G25490;AT5G11590;AT5G25810;AT5G51990;Glyma01g13410.1;Glyma01g35010.1;Glyma01g42500.1;Glyma03g27050.1;Glyma03g34970.1;Glyma04g08900.1;Glyma05g03560.1;Glyma05g04920.1;Glyma05g35740.1;Glyma06g08990.1;Glyma07g02000.1;Glyma07g14560.1;Glyma08g03910.1;Glyma08g21650.1;Glyma09g27180.1;Glyma09g32730.1;Glyma10g07740…
Vc9p318.12	UGT73C6(Vc9p318.12)	TFmatrixID_0085		449	+	cgCCGACaca	AP2; ERF;ERF	AT1G12610;AT1G33760;AT1G63030;AT1G77200;AT2G35700;AT2G44940;AT3G16280;AT3G60490;AT4G25480;AT4G25490;AT5G11590;AT5G25810;AT5G51990;Glyma01g13410.1;Glyma01g35010.1;Glyma01g42500.1;Glyma03g27050.1;Glyma03g34970.1;Glyma04g08900.1;Glyma05g03560.1;Glyma05g04920.1;Glyma05g35740.1;Glyma06g08990.1;Glyma07g02000.1;Glyma07g14560.1;Glyma08g03910.1;Glyma08g21650.1;Glyma09g27180.1;Glyma09g32730.1;Glyma10g07740…
Vc9p318.12	UGT73C6(Vc9p318.12)	TFmatrixID_0086		421	+	ataCCGACgt	AP2; ERF;ERF	AT1G12610;AT1G33760;AT1G63030;AT1G77200;AT2G35700;AT2G44940;AT3G16280;AT3G60490;AT4G25480;AT4G25490;AT5G11590;AT5G25810;AT5G51990;Glyma01g13410.1;Glyma01g35010.1;Glyma01g42500.1;Glyma03g27050.1;Glyma03g34970.1;Glyma04g08900.1;Glyma05g03560.1;Glyma05g04920.1;Glyma05g35740.1;Glyma06g08990.1;Glyma07g02000.1;Glyma07g14560.1;Glyma08g03910.1;Glyma08g21650.1;Glyma09g27180.1;Glyma09g32730.1;Glyma10g07740…
Vc9p318.12	UGT73C6(Vc9p318.12)	TFmatrixID_0086		448	+	acgCCGACac	AP2; ERF;ERF	AT1G12610;AT1G33760;AT1G63030;AT1G77200;AT2G35700;AT2G44940;AT3G16280;AT3G60490;AT4G25480;AT4G25490;AT5G11590;AT5G25810;AT5G51990;Glyma01g13410.1;Glyma01g35010.1;Glyma01g42500.1;Glyma03g27050.1;Glyma03g34970.1;Glyma04g08900.1;Glyma05g03560.1;Glyma05g04920.1;Glyma05g35740.1;Glyma06g08990.1;Glyma07g02000.1;Glyma07g14560.1;Glyma08g03910.1;Glyma08g21650.1;Glyma09g27180.1;Glyma09g32730.1;Glyma10g07740…
Vc9p318.12	UGT73C6(Vc9p318.12)	TFmatrixID_0088		422	+	taCCGACg	AP2; ERF;ERF	AT1G01250;AT1G12630;AT1G77200;AT2G25820;AT2G35700;AT2G44940;AT3G16280;AT3G60490;AT4G25490;AT4G32800;AT5G11590;AT5G25810;AT5G51990;Glyma01g13410.1;Glyma01g35010.1;Glyma03g27050.1;Glyma03g34970.1;Glyma03g41910.1;Glyma04g08900.1;Glyma05g04920.1;Glyma05g35740.1;Glyma06g08990.1;Glyma07g02000.1;Glyma07g06080.1;Glyma07g14560.1;Glyma08g03910.1;Glyma08g21650.1;Glyma09g27180.1;Glyma09g32730.1;Glyma10g38440…
Vc9p318.12	UGT73C6(Vc9p318.12)	TFmatrixID_0088		449	+	cgCCGACa	AP2; ERF;ERF	AT1G01250;AT1G12630;AT1G77200;AT2G25820;AT2G35700;AT2G44940;AT3G16280;AT3G60490;AT4G25490;AT4G32800;AT5G11590;AT5G25810;AT5G51990;Glyma01g13410.1;Glyma01g35010.1;Glyma03g27050.1;Glyma03g34970.1;Glyma03g41910.1;Glyma04g08900.1;Glyma05g04920.1;Glyma05g35740.1;Glyma06g08990.1;Glyma07g02000.1;Glyma07g06080.1;Glyma07g14560.1;Glyma08g03910.1;Glyma08g21650.1;Glyma09g27180.1;Glyma09g32730.1;Glyma10g38440…
Vc9p318.12	UGT73C6(Vc9p318.12)	TFmatrixID_0089		1816	+	acgCAACAaaaa	AP2; B3; RAV	AT1G13260
Vc9p318.12	UGT73C6(Vc9p318.12)	TFmatrixID_0093		1756	+	acgTAAAGctt	Dof	P38564
Vc9p318.12	UGT73C6(Vc9p318.12)	TFmatrixID_0094		228	-	acaCTTTTaaa	Dof	O24463
Vc9p318.12	UGT73C6(Vc9p318.12)	TFmatrixID_0094		389	-	tccCTTTTgaa	Dof	O24463
Vc9p318.12	UGT73C6(Vc9p318.12)	TFmatrixID_0094		1281	-	tctCTTTTtta	Dof	O24463
Vc9p318.12	UGT73C6(Vc9p318.12)	TFmatrixID_0108		464	+	atgcgtaATGATctttgca	bZIP; Homeodomain; HD-ZIP	AT1G30490
Vc9p318.12	UGT73C6(Vc9p318.12)	TFmatrixID_0108		476	+	ctttgcaATGATttagcca	bZIP; Homeodomain; HD-ZIP	AT1G30490
Vc9p318.12	UGT73C6(Vc9p318.12)	TFmatrixID_0109		448	+	acgCCGACac	AP2; ERF;ERF	AT1G12610;AT4G25490;AT5G51990;Glyma09g27180.1;Glyma10g38440.1;Glyma12g30740.1;Glyma16g32330.1;Glyma20g29410.1;Os02g0677300;Os06g0127100;POPTR_0001s08710;POPTR_0004s19820;POPTR_0009s14990;POPTR_0012s13870;POPTR_0015s13830;Sb04g031950;Sb06g025900;Sb10g001620;GRMZM2G042756;GRMZM2G137341;GRMZM2G380377
Vc9p318.12	UGT73C6(Vc9p318.12)	TFmatrixID_0118		422	+	taCCGACg	AP2; ERF;ERF	AT1G01250;AT1G19210;AT1G33760;AT2G23340;AT4G06746;AT4G36900;Glyma03g41910.1;Glyma07g02000.1;Glyma07g06080.1;Glyma10g38440.1;Glyma13g17250.1;Glyma16g02680.1;Glyma17g05240.1;Glyma19g44580.1;Glyma20g29410.1;Os08g0454000;POPTR_0001s18180;POPTR_0002s17320;POPTR_0002s17330;POPTR_0006s23480;POPTR_0012s13870;POPTR_0013s10340;POPTR_0014s09540;POPTR_0018s00700;POPTR_0019s10420;POPTR_0855s00200;Sb07g022265;…
Vc9p318.12	UGT73C6(Vc9p318.12)	TFmatrixID_0118		449	+	cgCCGACa	AP2; ERF;ERF	AT1G01250;AT1G19210;AT1G33760;AT2G23340;AT4G06746;AT4G36900;Glyma03g41910.1;Glyma07g02000.1;Glyma07g06080.1;Glyma10g38440.1;Glyma13g17250.1;Glyma16g02680.1;Glyma17g05240.1;Glyma19g44580.1;Glyma20g29410.1;Os08g0454000;POPTR_0001s18180;POPTR_0002s17320;POPTR_0002s17330;POPTR_0006s23480;POPTR_0012s13870;POPTR_0013s10340;POPTR_0014s09540;POPTR_0018s00700;POPTR_0019s10420;POPTR_0855s00200;Sb07g022265;…
Vc9p318.12	UGT73C6(Vc9p318.12)	TFmatrixID_0119		421	+	ataCCGACgt	AP2; ERF;ERF	AT1G01250;AT1G33760;AT1G77200;AT2G23340;AT4G06746;AT4G36900;AT5G11590;AT1G44830;Glyma01g35010.1;Glyma01g44130.1;Glyma03g41910.1;Glyma07g06080.1;Glyma09g32730.1;Glyma10g38440.1;Glyma13g17250.1;Glyma14g22740.1;Glyma16g02680.1;Glyma17g05240.1;Glyma17g27520.1;Glyma19g44580.1;Glyma20g29410.1;Glyma14g22970.1;Os06g0553700;Os08g0454000;Os10g0560700;Os02g0231000;Os02g0656600;Os02g0657000;Os04g0549700;Os04…
Vc9p318.12	UGT73C6(Vc9p318.12)	TFmatrixID_0119		448	+	acgCCGACac	AP2; ERF;ERF	AT1G01250;AT1G33760;AT1G77200;AT2G23340;AT4G06746;AT4G36900;AT5G11590;AT1G44830;Glyma01g35010.1;Glyma01g44130.1;Glyma03g41910.1;Glyma07g06080.1;Glyma09g32730.1;Glyma10g38440.1;Glyma13g17250.1;Glyma14g22740.1;Glyma16g02680.1;Glyma17g05240.1;Glyma17g27520.1;Glyma19g44580.1;Glyma20g29410.1;Glyma14g22970.1;Os06g0553700;Os08g0454000;Os10g0560700;Os02g0231000;Os02g0656600;Os02g0657000;Os04g0549700;Os04…
Vc9p318.12	UGT73C6(Vc9p318.12)	TFmatrixID_0121		422	+	taCCGACg	AP2; ERF;ERF;bHLH	AT1G01250;AT1G19210;AT1G33760;AT1G77200;AT2G23340;AT2G35700;AT2G44940;AT3G60490;AT4G06746;AT4G25490;AT4G36900;AT5G11590;AT5G21960;AT5G51990;AT1G21910;AT1G44830;AT1G46768;AT1G77640;AT3G50260;AT5G67190;Glyma01g13410.1;Glyma03g27050.1;Glyma03g41910.1;Glyma04g04350.1;Glyma04g08900.1;Glyma05g04920.1;Glyma06g04490.1;Glyma06g08990.1;Glyma07g06080.1;Glyma07g14560.1;Glyma10g38440.1;Glyma11g03790.1;Glyma13…
Vc9p318.12	UGT73C6(Vc9p318.12)	TFmatrixID_0121		449	+	cgCCGACa	AP2; ERF;ERF;bHLH	AT1G01250;AT1G19210;AT1G33760;AT1G77200;AT2G23340;AT2G35700;AT2G44940;AT3G60490;AT4G06746;AT4G25490;AT4G36900;AT5G11590;AT5G21960;AT5G51990;AT1G21910;AT1G44830;AT1G46768;AT1G77640;AT3G50260;AT5G67190;Glyma01g13410.1;Glyma03g27050.1;Glyma03g41910.1;Glyma04g04350.1;Glyma04g08900.1;Glyma05g04920.1;Glyma06g04490.1;Glyma06g08990.1;Glyma07g06080.1;Glyma07g14560.1;Glyma10g38440.1;Glyma11g03790.1;Glyma13…
Vc9p318.12	UGT73C6(Vc9p318.12)	TFmatrixID_0125		1136	+	atAACGTttg	AP2; B3	AT1G50680;AT1G51120
Vc9p318.12	UGT73C6(Vc9p318.12)	TFmatrixID_0125		1136	-	ataACGTTtg	AP2; B3	AT1G50680;AT1G51120
Vc9p318.12	UGT73C6(Vc9p318.12)	TFmatrixID_0127		1818	+	gCAACAaa	AP2; B3; RAV;ERF;RAV	AT3G25730;Glyma01g22260.1;Glyma02g11060.1;Glyma10g34760.1;Glyma20g32730.1;Os01g0693400;POPTR_0008s11600;POPTR_0010s13930;Sb03g031860;Sb09g027530;GRMZM2G059939;GRMZM2G169654
Vc9p318.12	UGT73C6(Vc9p318.12)	TFmatrixID_0129		193	-	AATTTtttg	AT-Hook	AT1G14900;AT1G48610;Glyma11g33690.1;POPTR_0004s08590;POPTR_0017s02940;Sb07g020920;GRMZM2G004878;GRMZM2G106133
Vc9p318.12	UGT73C6(Vc9p318.12)	TFmatrixID_0129		255	-	AATTTtttg	AT-Hook	AT1G14900;AT1G48610;Glyma11g33690.1;POPTR_0004s08590;POPTR_0017s02940;Sb07g020920;GRMZM2G004878;GRMZM2G106133
Vc9p318.12	UGT73C6(Vc9p318.12)	TFmatrixID_0129		1478	-	AATTTttct	AT-Hook	AT1G14900;AT1G48610;Glyma11g33690.1;POPTR_0004s08590;POPTR_0017s02940;Sb07g020920;GRMZM2G004878;GRMZM2G106133
Vc9p318.12	UGT73C6(Vc9p318.12)	TFmatrixID_0129		1510	-	AATTTttct	AT-Hook	AT1G14900;AT1G48610;Glyma11g33690.1;POPTR_0004s08590;POPTR_0017s02940;Sb07g020920;GRMZM2G004878;GRMZM2G106133
Vc9p318.12	UGT73C6(Vc9p318.12)	TFmatrixID_0131		680	+	gaaaATAAA	AT-Hook	AT1G19485;AT1G48610;Glyma06g01700.1;Glyma0856s00200.1;Glyma09g39650.1;Glyma18g46540.1;Os06g0326000;Os07g0184800;Os08g0512400;Os09g0491708;POPTR_0004s20060;Sb02g028500;Sb04g037880;GRMZM2G089562;GRMZM2G106133;GRMZM2G123887;GRMZM2G159926;GRMZM2G164489
Vc9p318.12	UGT73C6(Vc9p318.12)	TFmatrixID_0131		916	+	tggcATAAA	AT-Hook	AT1G19485;AT1G48610;Glyma06g01700.1;Glyma0856s00200.1;Glyma09g39650.1;Glyma18g46540.1;Os06g0326000;Os07g0184800;Os08g0512400;Os09g0491708;POPTR_0004s20060;Sb02g028500;Sb04g037880;GRMZM2G089562;GRMZM2G106133;GRMZM2G123887;GRMZM2G159926;GRMZM2G164489
Vc9p318.12	UGT73C6(Vc9p318.12)	TFmatrixID_0131		1090	-	TTTATtttg	AT-Hook	AT1G19485;AT1G48610;Glyma06g01700.1;Glyma0856s00200.1;Glyma09g39650.1;Glyma18g46540.1;Os06g0326000;Os07g0184800;Os08g0512400;Os09g0491708;POPTR_0004s20060;Sb02g028500;Sb04g037880;GRMZM2G089562;GRMZM2G106133;GRMZM2G123887;GRMZM2G159926;GRMZM2G164489
Vc9p318.12	UGT73C6(Vc9p318.12)	TFmatrixID_0131		1608	+	aaagATAAA	AT-Hook	AT1G19485;AT1G48610;Glyma06g01700.1;Glyma0856s00200.1;Glyma09g39650.1;Glyma18g46540.1;Os06g0326000;Os07g0184800;Os08g0512400;Os09g0491708;POPTR_0004s20060;Sb02g028500;Sb04g037880;GRMZM2G089562;GRMZM2G106133;GRMZM2G123887;GRMZM2G159926;GRMZM2G164489
Vc9p318.12	UGT73C6(Vc9p318.12)	TFmatrixID_0131		1691	-	TTTATttct	AT-Hook	AT1G19485;AT1G48610;Glyma06g01700.1;Glyma0856s00200.1;Glyma09g39650.1;Glyma18g46540.1;Os06g0326000;Os07g0184800;Os08g0512400;Os09g0491708;POPTR_0004s20060;Sb02g028500;Sb04g037880;GRMZM2G089562;GRMZM2G106133;GRMZM2G123887;GRMZM2G159926;GRMZM2G164489
Vc9p318.12	UGT73C6(Vc9p318.12)	TFmatrixID_0131		1765	-	TTTATtgca	AT-Hook	AT1G19485;AT1G48610;Glyma06g01700.1;Glyma0856s00200.1;Glyma09g39650.1;Glyma18g46540.1;Os06g0326000;Os07g0184800;Os08g0512400;Os09g0491708;POPTR_0004s20060;Sb02g028500;Sb04g037880;GRMZM2G089562;GRMZM2G106133;GRMZM2G123887;GRMZM2G159926;GRMZM2G164489
Vc9p318.12	UGT73C6(Vc9p318.12)	TFmatrixID_0132		679	+	ggaaAATAA	AT-Hook	AT4G21895;AT5G62260;Glyma04g10960.1;Glyma10g07550.1;Glyma13g21430.1;POPTR_0002s10560;POPTR_0005s17920;GRMZM2G150950
Vc9p318.12	UGT73C6(Vc9p318.12)	TFmatrixID_0132		707	-	TTATTttct	AT-Hook	AT4G21895;AT5G62260;Glyma04g10960.1;Glyma10g07550.1;Glyma13g21430.1;POPTR_0002s10560;POPTR_0005s17920;GRMZM2G150950
Vc9p318.12	UGT73C6(Vc9p318.12)	TFmatrixID_0132		1131	+	gaaaAATAA	AT-Hook	AT4G21895;AT5G62260;Glyma04g10960.1;Glyma10g07550.1;Glyma13g21430.1;POPTR_0002s10560;POPTR_0005s17920;GRMZM2G150950
Vc9p318.12	UGT73C6(Vc9p318.12)	TFmatrixID_0132		1312	-	TTATTttct	AT-Hook	AT4G21895;AT5G62260;Glyma04g10960.1;Glyma10g07550.1;Glyma13g21430.1;POPTR_0002s10560;POPTR_0005s17920;GRMZM2G150950
Vc9p318.12	UGT73C6(Vc9p318.12)	TFmatrixID_0133		257	-	TTTTTtggg	AT-Hook	Os01g0835600;Sb0621s002020;GRMZM2G008456;GRMZM2G127034
Vc9p318.12	UGT73C6(Vc9p318.12)	TFmatrixID_0133		258	-	TTTTTgggg	AT-Hook	Os01g0835600;Sb0621s002020;GRMZM2G008456;GRMZM2G127034
Vc9p318.12	UGT73C6(Vc9p318.12)	TFmatrixID_0136		681	+	aaaATAAA	AT-Hook	AT4G21895;AT5G62260;Glyma04g10960.1;Glyma10g07550.1;Glyma13g21430.1;Os07g0184800;POPTR_0002s10560;POPTR_0005s17920;GRMZM2G150950
Vc9p318.12	UGT73C6(Vc9p318.12)	TFmatrixID_0136		1090	-	TTTATttt	AT-Hook	AT4G21895;AT5G62260;Glyma04g10960.1;Glyma10g07550.1;Glyma13g21430.1;Os07g0184800;POPTR_0002s10560;POPTR_0005s17920;GRMZM2G150950
Vc9p318.12	UGT73C6(Vc9p318.12)	TFmatrixID_0138		681	+	aAAATAaa	AT-Hook	AT4G21895;AT5G62260;Glyma04g10960.1;Glyma10g07550.1;Glyma13g21430.1;POPTR_0002s10560;POPTR_0005s17920;GRMZM2G150950
Vc9p318.12	UGT73C6(Vc9p318.12)	TFmatrixID_0138		1090	-	ttTATTTt	AT-Hook	AT4G21895;AT5G62260;Glyma04g10960.1;Glyma10g07550.1;Glyma13g21430.1;POPTR_0002s10560;POPTR_0005s17920;GRMZM2G150950
Vc9p318.12	UGT73C6(Vc9p318.12)	TFmatrixID_0142		682	+	AAATAaat	AT-Hook	AT4G21895;AT5G62260;Glyma04g10960.1;Glyma10g07550.1;Glyma13g21430.1;POPTR_0002s10560;POPTR_0005s17920;GRMZM2G150950
Vc9p318.12	UGT73C6(Vc9p318.12)	TFmatrixID_0143		183	-	aTTATTctta	AT-Hook	GRMZM2G008456
Vc9p318.12	UGT73C6(Vc9p318.12)	TFmatrixID_0143		285	+	taagAATAAt	AT-Hook	GRMZM2G008456
Vc9p318.12	UGT73C6(Vc9p318.12)	TFmatrixID_0143		679	+	ggaaAATAAa	AT-Hook	GRMZM2G008456
Vc9p318.12	UGT73C6(Vc9p318.12)	TFmatrixID_0143		703	-	aTTATTattt	AT-Hook	GRMZM2G008456
Vc9p318.12	UGT73C6(Vc9p318.12)	TFmatrixID_0143		813	+	ctctAATAAt	AT-Hook	GRMZM2G008456
Vc9p318.12	UGT73C6(Vc9p318.12)	TFmatrixID_0143		1090	-	tTTATTttga	AT-Hook	GRMZM2G008456
Vc9p318.12	UGT73C6(Vc9p318.12)	TFmatrixID_0143		1691	-	tTTATTtcta	AT-Hook	GRMZM2G008456
Vc9p318.12	UGT73C6(Vc9p318.12)	TFmatrixID_0143		1765	-	tTTATTgcac	AT-Hook	GRMZM2G008456
Vc9p318.12	UGT73C6(Vc9p318.12)	TFmatrixID_0143		1955	-	aTTATTcttt	AT-Hook	GRMZM2G008456
Vc9p318.12	UGT73C6(Vc9p318.12)	TFmatrixID_0144		1271	-	gatTAATAtctc	AT-Hook	AT4G21895;AT5G62260;Glyma04g10960.1;Glyma10g07550.1;Glyma13g21430.1;POPTR_0002s10560;POPTR_0005s17920;GRMZM2G150950
Vc9p318.12	UGT73C6(Vc9p318.12)	TFmatrixID_0145		1130	+	agaAAAAT	AT-Hook	GRMZM2G008456
Vc9p318.12	UGT73C6(Vc9p318.12)	TFmatrixID_0145		1479	-	ATTTTtct	AT-Hook	GRMZM2G008456
Vc9p318.12	UGT73C6(Vc9p318.12)	TFmatrixID_0145		1511	-	ATTTTtct	AT-Hook	GRMZM2G008456
Vc9p318.12	UGT73C6(Vc9p318.12)	TFmatrixID_0146		706	-	ATTATtttc	AT-Hook	AT4G21895;AT5G62260;Glyma04g10960.1;Glyma10g07550.1;Glyma13g21430.1;Os07g0184800;POPTR_0002s10560;POPTR_0005s17920;GRMZM2G150950
Vc9p318.12	UGT73C6(Vc9p318.12)	TFmatrixID_0146		838	-	ATTATttgt	AT-Hook	AT4G21895;AT5G62260;Glyma04g10960.1;Glyma10g07550.1;Glyma13g21430.1;Os07g0184800;POPTR_0002s10560;POPTR_0005s17920;GRMZM2G150950
Vc9p318.12	UGT73C6(Vc9p318.12)	TFmatrixID_0146		1065	-	ATTATttaa	AT-Hook	AT4G21895;AT5G62260;Glyma04g10960.1;Glyma10g07550.1;Glyma13g21430.1;Os07g0184800;POPTR_0002s10560;POPTR_0005s17920;GRMZM2G150950
Vc9p318.12	UGT73C6(Vc9p318.12)	TFmatrixID_0146		1311	-	ATTATtttc	AT-Hook	AT4G21895;AT5G62260;Glyma04g10960.1;Glyma10g07550.1;Glyma13g21430.1;Os07g0184800;POPTR_0002s10560;POPTR_0005s17920;GRMZM2G150950
Vc9p318.12	UGT73C6(Vc9p318.12)	TFmatrixID_0146		1377	-	ATTATcttt	AT-Hook	AT4G21895;AT5G62260;Glyma04g10960.1;Glyma10g07550.1;Glyma13g21430.1;Os07g0184800;POPTR_0002s10560;POPTR_0005s17920;GRMZM2G150950
Vc9p318.12	UGT73C6(Vc9p318.12)	TFmatrixID_0146		1826	+	aaacATAAT	AT-Hook	AT4G21895;AT5G62260;Glyma04g10960.1;Glyma10g07550.1;Glyma13g21430.1;Os07g0184800;POPTR_0002s10560;POPTR_0005s17920;GRMZM2G150950
Vc9p318.12	UGT73C6(Vc9p318.12)	TFmatrixID_0148		193	-	aATTTTtt	AT-Hook	AT1G19485;AT1G48610;Glyma06g01700.1;Glyma0856s00200.1;Glyma09g39650.1;Glyma18g46540.1;Os02g0824300;Os06g0326000;Os07g0184800;Os08g0512400;Os09g0491708;POPTR_0004s20060;Sb02g028500;Sb04g037880;GRMZM2G089562;GRMZM2G106133;GRMZM2G123887;GRMZM2G159926;GRMZM2G164489
Vc9p318.12	UGT73C6(Vc9p318.12)	TFmatrixID_0148		255	-	aATTTTtt	AT-Hook	AT1G19485;AT1G48610;Glyma06g01700.1;Glyma0856s00200.1;Glyma09g39650.1;Glyma18g46540.1;Os02g0824300;Os06g0326000;Os07g0184800;Os08g0512400;Os09g0491708;POPTR_0004s20060;Sb02g028500;Sb04g037880;GRMZM2G089562;GRMZM2G106133;GRMZM2G123887;GRMZM2G159926;GRMZM2G164489
Vc9p318.12	UGT73C6(Vc9p318.12)	TFmatrixID_0148		760	+	atAAAATt	AT-Hook	AT1G19485;AT1G48610;Glyma06g01700.1;Glyma0856s00200.1;Glyma09g39650.1;Glyma18g46540.1;Os02g0824300;Os06g0326000;Os07g0184800;Os08g0512400;Os09g0491708;POPTR_0004s20060;Sb02g028500;Sb04g037880;GRMZM2G089562;GRMZM2G106133;GRMZM2G123887;GRMZM2G159926;GRMZM2G164489
Vc9p318.12	UGT73C6(Vc9p318.12)	TFmatrixID_0148		1024	+	aaAAAATc	AT-Hook	AT1G19485;AT1G48610;Glyma06g01700.1;Glyma0856s00200.1;Glyma09g39650.1;Glyma18g46540.1;Os02g0824300;Os06g0326000;Os07g0184800;Os08g0512400;Os09g0491708;POPTR_0004s20060;Sb02g028500;Sb04g037880;GRMZM2G089562;GRMZM2G106133;GRMZM2G123887;GRMZM2G159926;GRMZM2G164489
Vc9p318.12	UGT73C6(Vc9p318.12)	TFmatrixID_0149		515	-	gaAAATAtta	AT-Hook	Os11g0602200
Vc9p318.12	UGT73C6(Vc9p318.12)	TFmatrixID_0149		739	-	tgAAATAttt	AT-Hook	Os11g0602200
Vc9p318.12	UGT73C6(Vc9p318.12)	TFmatrixID_0149		741	+	aaaTATTTaa	AT-Hook	Os11g0602200
Vc9p318.12	UGT73C6(Vc9p318.12)	TFmatrixID_0149		863	-	tgAAATAttt	AT-Hook	Os11g0602200
Vc9p318.12	UGT73C6(Vc9p318.12)	TFmatrixID_0149		865	+	aaaTATTTct	AT-Hook	Os11g0602200
Vc9p318.12	UGT73C6(Vc9p318.12)	TFmatrixID_0149		1234	-	gaAAATAttt	AT-Hook	Os11g0602200
Vc9p318.12	UGT73C6(Vc9p318.12)	TFmatrixID_0149		1236	+	aaaTATTTct	AT-Hook	Os11g0602200
Vc9p318.12	UGT73C6(Vc9p318.12)	TFmatrixID_0150		516	+	aaAATATtat	AT-Hook	Os01g0835600;Sb0621s002020;GRMZM2G008456;GRMZM2G127034
Vc9p318.12	UGT73C6(Vc9p318.12)	TFmatrixID_0150		516	-	aaaATATTat	AT-Hook	Os01g0835600;Sb0621s002020;GRMZM2G008456;GRMZM2G127034
Vc9p318.12	UGT73C6(Vc9p318.12)	TFmatrixID_0150		698	+	cgAATATtat	AT-Hook	Os01g0835600;Sb0621s002020;GRMZM2G008456;GRMZM2G127034
Vc9p318.12	UGT73C6(Vc9p318.12)	TFmatrixID_0150		698	-	cgaATATTat	AT-Hook	Os01g0835600;Sb0621s002020;GRMZM2G008456;GRMZM2G127034
Vc9p318.12	UGT73C6(Vc9p318.12)	TFmatrixID_0150		740	+	gaAATATtta	AT-Hook	Os01g0835600;Sb0621s002020;GRMZM2G008456;GRMZM2G127034
Vc9p318.12	UGT73C6(Vc9p318.12)	TFmatrixID_0150		740	-	gaaATATTta	AT-Hook	Os01g0835600;Sb0621s002020;GRMZM2G008456;GRMZM2G127034
Vc9p318.12	UGT73C6(Vc9p318.12)	TFmatrixID_0150		853	+	acAATATtca	AT-Hook	Os01g0835600;Sb0621s002020;GRMZM2G008456;GRMZM2G127034
Vc9p318.12	UGT73C6(Vc9p318.12)	TFmatrixID_0150		853	-	acaATATTca	AT-Hook	Os01g0835600;Sb0621s002020;GRMZM2G008456;GRMZM2G127034
Vc9p318.12	UGT73C6(Vc9p318.12)	TFmatrixID_0150		864	+	gaAATATttc	AT-Hook	Os01g0835600;Sb0621s002020;GRMZM2G008456;GRMZM2G127034
Vc9p318.12	UGT73C6(Vc9p318.12)	TFmatrixID_0150		864	-	gaaATATTtc	AT-Hook	Os01g0835600;Sb0621s002020;GRMZM2G008456;GRMZM2G127034
Vc9p318.12	UGT73C6(Vc9p318.12)	TFmatrixID_0150		1235	+	aaAATATttc	AT-Hook	Os01g0835600;Sb0621s002020;GRMZM2G008456;GRMZM2G127034
Vc9p318.12	UGT73C6(Vc9p318.12)	TFmatrixID_0150		1235	-	aaaATATTtc	AT-Hook	Os01g0835600;Sb0621s002020;GRMZM2G008456;GRMZM2G127034
Vc9p318.12	UGT73C6(Vc9p318.12)	TFmatrixID_0152		193	-	AATTTtt	AT-Hook	AT1G19485;AT1G48610;Glyma0856s00200.1;Glyma09g39650.1;Glyma18g46540.1;Os06g0326000;POPTR_0004s20060;Sb04g037880;GRMZM2G089562;GRMZM2G106133;GRMZM2G123887;GRMZM2G164489
Vc9p318.12	UGT73C6(Vc9p318.12)	TFmatrixID_0152		255	-	AATTTtt	AT-Hook	AT1G19485;AT1G48610;Glyma0856s00200.1;Glyma09g39650.1;Glyma18g46540.1;Os06g0326000;POPTR_0004s20060;Sb04g037880;GRMZM2G089562;GRMZM2G106133;GRMZM2G123887;GRMZM2G164489
Vc9p318.12	UGT73C6(Vc9p318.12)	TFmatrixID_0152		1478	-	AATTTtt	AT-Hook	AT1G19485;AT1G48610;Glyma0856s00200.1;Glyma09g39650.1;Glyma18g46540.1;Os06g0326000;POPTR_0004s20060;Sb04g037880;GRMZM2G089562;GRMZM2G106133;GRMZM2G123887;GRMZM2G164489
Vc9p318.12	UGT73C6(Vc9p318.12)	TFmatrixID_0152		1510	-	AATTTtt	AT-Hook	AT1G19485;AT1G48610;Glyma0856s00200.1;Glyma09g39650.1;Glyma18g46540.1;Os06g0326000;POPTR_0004s20060;Sb04g037880;GRMZM2G089562;GRMZM2G106133;GRMZM2G123887;GRMZM2G164489
Vc9p318.12	UGT73C6(Vc9p318.12)	TFmatrixID_0154		516	+	aAAATAtt	AT-Hook	AT4G21895;AT5G62260;Glyma04g10960.1;Glyma10g07550.1;Glyma13g21430.1;Os07g0184800;POPTR_0002s10560;POPTR_0005s17920;GRMZM2G150950
Vc9p318.12	UGT73C6(Vc9p318.12)	TFmatrixID_0154		706	-	atTATTTt	AT-Hook	AT4G21895;AT5G62260;Glyma04g10960.1;Glyma10g07550.1;Glyma13g21430.1;Os07g0184800;POPTR_0002s10560;POPTR_0005s17920;GRMZM2G150950
Vc9p318.12	UGT73C6(Vc9p318.12)	TFmatrixID_0154		1235	+	aAAATAtt	AT-Hook	AT4G21895;AT5G62260;Glyma04g10960.1;Glyma10g07550.1;Glyma13g21430.1;Os07g0184800;POPTR_0002s10560;POPTR_0005s17920;GRMZM2G150950
Vc9p318.12	UGT73C6(Vc9p318.12)	TFmatrixID_0154		1311	-	atTATTTt	AT-Hook	AT4G21895;AT5G62260;Glyma04g10960.1;Glyma10g07550.1;Glyma13g21430.1;Os07g0184800;POPTR_0002s10560;POPTR_0005s17920;GRMZM2G150950
Vc9p318.12	UGT73C6(Vc9p318.12)	TFmatrixID_0155		1809	-	atGCATGa	B3	AT1G28300
Vc9p318.12	UGT73C6(Vc9p318.12)	TFmatrixID_0156		450	+	gcCGACAca	B3; ARF;ARF	AT1G19220;AT1G19850;AT1G30330;AT5G20730;AT5G37020;AT5G60450;Glyma01g00510.1;Glyma02g40650.1;Glyma02g45100.1;Glyma05g27580.1;Glyma05g36430.1;Glyma07g15640.1;Glyma08g03140.1;Glyma08g10550.1;Glyma09g08350.1;Glyma11g15910.1;Glyma11g31940.1;Glyma12g07560.1;Glyma12g29280.1;Glyma13g17270.1;Glyma13g29320.1;Glyma14g03650.1;Glyma14g38940.1;Glyma14g40540.1;Glyma15g09750.1;Glyma15g19980.1;Glyma17g05220.1;Gly…
Vc9p318.12	UGT73C6(Vc9p318.12)	TFmatrixID_0174		27	-	gaaAGTGC	bHLH	AT1G10120;AT1G18400;AT1G25330;AT1G26260;AT1G68920;AT1G73830;AT2G24260;AT3G07340;AT3G23690;AT4G30980;AT4G34530;AT5G48560;AT5G50915;AT5G58010;AT5G62610;AT2G42300;AT3G57800;Glyma0041s00210.1;Glyma01g04610.1;Glyma01g09400.1;Glyma02g02930.1;Glyma02g02940.1;Glyma02g13860.1;Glyma03g21770.1;Glyma03g29710.1;Glyma04g01400.1;Glyma04g05090.1;Glyma04g34660.1;Glyma04g37690.1;Glyma05g01590.1;Glyma05g35060.1;Gly…
Vc9p318.12	UGT73C6(Vc9p318.12)	TFmatrixID_0174		161	+	ACACGagc	bHLH	AT1G10120;AT1G18400;AT1G25330;AT1G26260;AT1G68920;AT1G73830;AT2G24260;AT3G07340;AT3G23690;AT4G30980;AT4G34530;AT5G48560;AT5G50915;AT5G58010;AT5G62610;AT2G42300;AT3G57800;Glyma0041s00210.1;Glyma01g04610.1;Glyma01g09400.1;Glyma02g02930.1;Glyma02g02940.1;Glyma02g13860.1;Glyma03g21770.1;Glyma03g29710.1;Glyma04g01400.1;Glyma04g05090.1;Glyma04g34660.1;Glyma04g37690.1;Glyma05g01590.1;Glyma05g35060.1;Gly…
Vc9p318.12	UGT73C6(Vc9p318.12)	TFmatrixID_0174		161	-	acaCGAGC	bHLH	AT1G10120;AT1G18400;AT1G25330;AT1G26260;AT1G68920;AT1G73830;AT2G24260;AT3G07340;AT3G23690;AT4G30980;AT4G34530;AT5G48560;AT5G50915;AT5G58010;AT5G62610;AT2G42300;AT3G57800;Glyma0041s00210.1;Glyma01g04610.1;Glyma01g09400.1;Glyma02g02930.1;Glyma02g02940.1;Glyma02g13860.1;Glyma03g21770.1;Glyma03g29710.1;Glyma04g01400.1;Glyma04g05090.1;Glyma04g34660.1;Glyma04g37690.1;Glyma05g01590.1;Glyma05g35060.1;Gly…
Vc9p318.12	UGT73C6(Vc9p318.12)	TFmatrixID_0174		309	+	GCTCGtgt	bHLH	AT1G10120;AT1G18400;AT1G25330;AT1G26260;AT1G68920;AT1G73830;AT2G24260;AT3G07340;AT3G23690;AT4G30980;AT4G34530;AT5G48560;AT5G50915;AT5G58010;AT5G62610;AT2G42300;AT3G57800;Glyma0041s00210.1;Glyma01g04610.1;Glyma01g09400.1;Glyma02g02930.1;Glyma02g02940.1;Glyma02g13860.1;Glyma03g21770.1;Glyma03g29710.1;Glyma04g01400.1;Glyma04g05090.1;Glyma04g34660.1;Glyma04g37690.1;Glyma05g01590.1;Glyma05g35060.1;Gly…
Vc9p318.12	UGT73C6(Vc9p318.12)	TFmatrixID_0174		309	-	gctCGTGT	bHLH	AT1G10120;AT1G18400;AT1G25330;AT1G26260;AT1G68920;AT1G73830;AT2G24260;AT3G07340;AT3G23690;AT4G30980;AT4G34530;AT5G48560;AT5G50915;AT5G58010;AT5G62610;AT2G42300;AT3G57800;Glyma0041s00210.1;Glyma01g04610.1;Glyma01g09400.1;Glyma02g02930.1;Glyma02g02940.1;Glyma02g13860.1;Glyma03g21770.1;Glyma03g29710.1;Glyma04g01400.1;Glyma04g05090.1;Glyma04g34660.1;Glyma04g37690.1;Glyma05g01590.1;Glyma05g35060.1;Gly…
Vc9p318.12	UGT73C6(Vc9p318.12)	TFmatrixID_0185		425	+	cgaCGTCAca	bZIP	AT1G08320;AT1G68640;AT1G77920;AT5G06839;Glyma01g21020.1;Glyma03g28320.1;Glyma03g28400.1;Glyma03g29820.1;Glyma05g31620.1;Glyma06g11250.1;Glyma08g14840.1;Glyma10g12000.1;Glyma10g42280.1;Glyma10g44270.1;Glyma11g19030.1;Glyma11g36010.1;Glyma12g09430.1;Glyma12g30990.1;Glyma13g26280.1;Glyma13g33380.1;Glyma13g33480.1;Glyma13g39330.1;Glyma14g33800.1;Glyma15g37220.1;Glyma18g02430.1;Glyma19g31050.1;Glyma19…
Vc9p318.12	UGT73C6(Vc9p318.12)	TFmatrixID_0185		1812	-	caTGACGcaa	bZIP	AT1G08320;AT1G68640;AT1G77920;AT5G06839;Glyma01g21020.1;Glyma03g28320.1;Glyma03g28400.1;Glyma03g29820.1;Glyma05g31620.1;Glyma06g11250.1;Glyma08g14840.1;Glyma10g12000.1;Glyma10g42280.1;Glyma10g44270.1;Glyma11g19030.1;Glyma11g36010.1;Glyma12g09430.1;Glyma12g30990.1;Glyma13g26280.1;Glyma13g33380.1;Glyma13g33480.1;Glyma13g39330.1;Glyma14g33800.1;Glyma15g37220.1;Glyma18g02430.1;Glyma19g31050.1;Glyma19…
Vc9p318.12	UGT73C6(Vc9p318.12)	TFmatrixID_0187		1	+	aaACGTGtcc	bZIP	AT2G36270
Vc9p318.12	UGT73C6(Vc9p318.12)	TFmatrixID_0188		18	+	gGACAGttgg	bZIP	AT1G06070;AT2G31370;AT2G40620;Glyma04g40010.1;Glyma12g04050.1;Glyma12g05520.1;Glyma13g42030.1;Glyma14g38460.1;Glyma14g40580.1;Glyma15g03350.1;Glyma17g37510.1;Os03g0127500;Os03g0336200;POPTR_0013s15280;Sb01g048710;Sb02g030170;Sb05g003810;Sb08g003940;GRMZM2G037910;GRMZM2G043600;GRMZM2G062391;GRMZM2G079365;GRMZM2G112483;GRMZM2G118393;GRMZM2G136266;GRMZM2G146020;GRMZM2G149040;GRMZM2G175280;GRMZM2G332…
Vc9p318.12	UGT73C6(Vc9p318.12)	TFmatrixID_0191		423	-	accGACGTca	bZIP;B3; bZIP	AT1G08320;AT1G68640;AT3G12250;AT5G06839;Glyma01g21020.1;Glyma03g28320.1;Glyma03g28400.1;Glyma03g29820.1;Glyma05g31620.1;Glyma06g11250.1;Glyma08g14840.1;Glyma10g12000.1;Glyma10g42280.1;Glyma10g44270.1;Glyma11g19030.1;Glyma11g36010.1;Glyma12g09430.1;Glyma12g30990.1;Glyma13g26280.1;Glyma13g33380.1;Glyma13g33480.1;Glyma13g39330.1;Glyma14g33800.1;Glyma15g37220.1;Glyma18g02430.1;Glyma19g31050.1;Glyma19…
Vc9p318.12	UGT73C6(Vc9p318.12)	TFmatrixID_0191		425	+	cgACGTCaca	bZIP;B3; bZIP	AT1G08320;AT1G68640;AT3G12250;AT5G06839;Glyma01g21020.1;Glyma03g28320.1;Glyma03g28400.1;Glyma03g29820.1;Glyma05g31620.1;Glyma06g11250.1;Glyma08g14840.1;Glyma10g12000.1;Glyma10g42280.1;Glyma10g44270.1;Glyma11g19030.1;Glyma11g36010.1;Glyma12g09430.1;Glyma12g30990.1;Glyma13g26280.1;Glyma13g33380.1;Glyma13g33480.1;Glyma13g39330.1;Glyma14g33800.1;Glyma15g37220.1;Glyma18g02430.1;Glyma19g31050.1;Glyma19…
Vc9p318.12	UGT73C6(Vc9p318.12)	TFmatrixID_0193		1	+	AAACGtgt	bZIP	AT3G19290;AT4G34000;Glyma02g14880.1;Glyma04g04170.1;Glyma06g04350.1;Glyma07g33600.1;Glyma10g08370.1;Glyma12g30980.1;Glyma13g39340.1;Glyma19g30230.1;Glyma19g37910.1;Os02g0766700;Os05g0489700;Os06g0211200;Os09g0456200;POPTR_0002s12710;POPTR_0004s14790;POPTR_0006s08300;POPTR_0009s10400;POPTR_0009s16610;POPTR_0014s02810;Sb02g026570;Sb02g043620;Sb03g037740;Sb03g040970;Sb04g034190;Sb06g026410;Sb07g0229…
Vc9p318.12	UGT73C6(Vc9p318.12)	TFmatrixID_0193		1	-	aaaCGTGT	bZIP	AT3G19290;AT4G34000;Glyma02g14880.1;Glyma04g04170.1;Glyma06g04350.1;Glyma07g33600.1;Glyma10g08370.1;Glyma12g30980.1;Glyma13g39340.1;Glyma19g30230.1;Glyma19g37910.1;Os02g0766700;Os05g0489700;Os06g0211200;Os09g0456200;POPTR_0002s12710;POPTR_0004s14790;POPTR_0006s08300;POPTR_0009s10400;POPTR_0009s16610;POPTR_0014s02810;Sb02g026570;Sb02g043620;Sb03g037740;Sb03g040970;Sb04g034190;Sb06g026410;Sb07g0229…
Vc9p318.12	UGT73C6(Vc9p318.12)	TFmatrixID_0193		161	+	ACACGagc	bZIP	AT3G19290;AT4G34000;Glyma02g14880.1;Glyma04g04170.1;Glyma06g04350.1;Glyma07g33600.1;Glyma10g08370.1;Glyma12g30980.1;Glyma13g39340.1;Glyma19g30230.1;Glyma19g37910.1;Os02g0766700;Os05g0489700;Os06g0211200;Os09g0456200;POPTR_0002s12710;POPTR_0004s14790;POPTR_0006s08300;POPTR_0009s10400;POPTR_0009s16610;POPTR_0014s02810;Sb02g026570;Sb02g043620;Sb03g037740;Sb03g040970;Sb04g034190;Sb06g026410;Sb07g0229…
Vc9p318.12	UGT73C6(Vc9p318.12)	TFmatrixID_0193		228	+	ACACTttt	bZIP	AT3G19290;AT4G34000;Glyma02g14880.1;Glyma04g04170.1;Glyma06g04350.1;Glyma07g33600.1;Glyma10g08370.1;Glyma12g30980.1;Glyma13g39340.1;Glyma19g30230.1;Glyma19g37910.1;Os02g0766700;Os05g0489700;Os06g0211200;Os09g0456200;POPTR_0002s12710;POPTR_0004s14790;POPTR_0006s08300;POPTR_0009s10400;POPTR_0009s16610;POPTR_0014s02810;Sb02g026570;Sb02g043620;Sb03g037740;Sb03g040970;Sb04g034190;Sb06g026410;Sb07g0229…
Vc9p318.12	UGT73C6(Vc9p318.12)	TFmatrixID_0193		309	-	gctCGTGT	bZIP	AT3G19290;AT4G34000;Glyma02g14880.1;Glyma04g04170.1;Glyma06g04350.1;Glyma07g33600.1;Glyma10g08370.1;Glyma12g30980.1;Glyma13g39340.1;Glyma19g30230.1;Glyma19g37910.1;Os02g0766700;Os05g0489700;Os06g0211200;Os09g0456200;POPTR_0002s12710;POPTR_0004s14790;POPTR_0006s08300;POPTR_0009s10400;POPTR_0009s16610;POPTR_0014s02810;Sb02g026570;Sb02g043620;Sb03g037740;Sb03g040970;Sb04g034190;Sb06g026410;Sb07g0229…
Vc9p318.12	UGT73C6(Vc9p318.12)	TFmatrixID_0194		1	-	aaACGTGtcc	bZIP	AT2G35530;AT4G36730;Glyma01g01740.1;Glyma01g38380.1;Glyma02g06550.1;Glyma03g41590.1;Glyma08g34280.1;Glyma09g34170.1;Glyma16g03190.1;Glyma16g15810.1;Glyma16g25600.1;Glyma19g44190.1;Os01g0658900;Os02g0128200;Os05g0569300;Os07g0209800;Os12g0233800;POPTR_0001s01840;POPTR_0003s09630;POPTR_0005s12750;POPTR_0007s12460;POPTR_0014s08990;Sb02g006350;Sb03g030050;Sb04g002360;Sb08g008300;Sb09g028990;GRMZM2G01…
Vc9p318.12	UGT73C6(Vc9p318.12)	TFmatrixID_0195		425	+	cgaCGTCAca	bZIP;B3; bZIP	AT1G08320;AT1G68640;AT5G06839;AT5G06950;Glyma01g21020.1;Glyma03g28320.1;Glyma03g28400.1;Glyma03g29820.1;Glyma05g31620.1;Glyma06g11250.1;Glyma08g14840.1;Glyma10g12000.1;Glyma10g42280.1;Glyma10g44270.1;Glyma11g19030.1;Glyma11g36010.1;Glyma12g09430.1;Glyma12g30990.1;Glyma13g26280.1;Glyma13g33380.1;Glyma13g33480.1;Glyma13g39330.1;Glyma14g33800.1;Glyma15g37220.1;Glyma18g02430.1;Glyma19g31050.1;Glyma19…
Vc9p318.12	UGT73C6(Vc9p318.12)	TFmatrixID_0195		1812	-	caTGACGcaa	bZIP;B3; bZIP	AT1G08320;AT1G68640;AT5G06839;AT5G06950;Glyma01g21020.1;Glyma03g28320.1;Glyma03g28400.1;Glyma03g29820.1;Glyma05g31620.1;Glyma06g11250.1;Glyma08g14840.1;Glyma10g12000.1;Glyma10g42280.1;Glyma10g44270.1;Glyma11g19030.1;Glyma11g36010.1;Glyma12g09430.1;Glyma12g30990.1;Glyma13g26280.1;Glyma13g33380.1;Glyma13g33480.1;Glyma13g39330.1;Glyma14g33800.1;Glyma15g37220.1;Glyma18g02430.1;Glyma19g31050.1;Glyma19…
Vc9p318.12	UGT73C6(Vc9p318.12)	TFmatrixID_0196		426	+	gaCGTCAc	bZIP;B3; bZIP	AT1G08320;AT1G68640;AT5G06839;AT5G06960;Glyma01g21020.1;Glyma03g28320.1;Glyma03g28400.1;Glyma03g29820.1;Glyma05g31620.1;Glyma06g11250.1;Glyma08g14840.1;Glyma10g12000.1;Glyma10g42280.1;Glyma10g44270.1;Glyma11g19030.1;Glyma11g36010.1;Glyma12g09430.1;Glyma12g30990.1;Glyma13g26280.1;Glyma13g33380.1;Glyma13g33480.1;Glyma13g39330.1;Glyma14g33800.1;Glyma15g37220.1;Glyma18g02430.1;Glyma19g31050.1;Glyma19…
Vc9p318.12	UGT73C6(Vc9p318.12)	TFmatrixID_0196		1813	-	aTGACGca	bZIP;B3; bZIP	AT1G08320;AT1G68640;AT5G06839;AT5G06960;Glyma01g21020.1;Glyma03g28320.1;Glyma03g28400.1;Glyma03g29820.1;Glyma05g31620.1;Glyma06g11250.1;Glyma08g14840.1;Glyma10g12000.1;Glyma10g42280.1;Glyma10g44270.1;Glyma11g19030.1;Glyma11g36010.1;Glyma12g09430.1;Glyma12g30990.1;Glyma13g26280.1;Glyma13g33380.1;Glyma13g33480.1;Glyma13g39330.1;Glyma14g33800.1;Glyma15g37220.1;Glyma18g02430.1;Glyma19g31050.1;Glyma19…
Vc9p318.12	UGT73C6(Vc9p318.12)	TFmatrixID_0197		425	+	cgaCGTCAca	bZIP	AT1G08320;AT1G68640;AT5G06839;AT5G10030;Glyma01g21020.1;Glyma03g28320.1;Glyma03g28400.1;Glyma03g29820.1;Glyma05g31620.1;Glyma06g11250.1;Glyma08g14840.1;Glyma10g12000.1;Glyma10g42280.1;Glyma10g44270.1;Glyma11g19030.1;Glyma11g36010.1;Glyma12g09430.1;Glyma12g30990.1;Glyma13g26280.1;Glyma13g33380.1;Glyma13g33480.1;Glyma13g39330.1;Glyma14g33800.1;Glyma15g37220.1;Glyma18g02430.1;Glyma19g31050.1;Glyma19…
Vc9p318.12	UGT73C6(Vc9p318.12)	TFmatrixID_0198		424	+	ccgACGTCacaa	bZIP	AT3G54620;AT5G24800;AT5G28770;Glyma03g40730.1;Glyma04g08290.1;Glyma06g08390.1;Glyma10g30410.1;Glyma17g24450.1;Glyma19g43420.1;Glyma20g36750.1;Os02g0175100;Os03g0796900;Os06g0662200;Os12g0601800;POPTR_0002s04660;POPTR_0005s05470;POPTR_0005s23900;POPTR_0006s29250;POPTR_0013s03800;Sb01g005170;Sb02g004610;Sb04g005020;Sb10g026450;GRMZM2G007063;GRMZM2G016150;GRMZM2G019446;GRMZM2G073427;GRMZM2G098904;GR…
Vc9p318.12	UGT73C6(Vc9p318.12)	TFmatrixID_0199		425	+	cgaCGTCAca	bZIP	AT1G08320;AT1G68640;AT5G06839;AT5G65210;Glyma01g21020.1;Glyma03g28320.1;Glyma03g28400.1;Glyma03g29820.1;Glyma05g31620.1;Glyma06g11250.1;Glyma08g14840.1;Glyma10g12000.1;Glyma10g42280.1;Glyma10g44270.1;Glyma11g19030.1;Glyma11g36010.1;Glyma12g09430.1;Glyma12g30990.1;Glyma13g26280.1;Glyma13g33380.1;Glyma13g33480.1;Glyma13g39330.1;Glyma14g33800.1;Glyma15g37220.1;Glyma18g02430.1;Glyma19g31050.1;Glyma19…
Vc9p318.12	UGT73C6(Vc9p318.12)	TFmatrixID_0199		1812	-	caTGACGcaa	bZIP	AT1G08320;AT1G68640;AT5G06839;AT5G65210;Glyma01g21020.1;Glyma03g28320.1;Glyma03g28400.1;Glyma03g29820.1;Glyma05g31620.1;Glyma06g11250.1;Glyma08g14840.1;Glyma10g12000.1;Glyma10g42280.1;Glyma10g44270.1;Glyma11g19030.1;Glyma11g36010.1;Glyma12g09430.1;Glyma12g30990.1;Glyma13g26280.1;Glyma13g33380.1;Glyma13g33480.1;Glyma13g39330.1;Glyma14g33800.1;Glyma15g37220.1;Glyma18g02430.1;Glyma19g31050.1;Glyma19…
Vc9p318.12	UGT73C6(Vc9p318.12)	TFmatrixID_0202		1	-	aaACGTGt	bZIP	AT1G03970;AT5G44080;Glyma08g08220.1;Glyma10g36820.1;Os01g0867300;Os05g0437700;Os06g0211200;POPTR_0002s06800;POPTR_0005s21500;Sb03g040970;Sb09g021580;AC155610.2_FG005;GRMZM2G129247;GRMZM2G132868
Vc9p318.12	UGT73C6(Vc9p318.12)	TFmatrixID_0211		227	+	cACACTt	C2H2	AT1G27730;AT3G49930;AT3G60580;AT5G04340;AT5G43170;Glyma04g04760.1;Glyma06g04840.1;Glyma14g09760.1;Glyma17g35430.1;Os03g0437200;Os12g0583700;POPTR_0001s30260;POPTR_0009s09250;POPTR_0014s01760;Sb01g031920;Sb02g038000;Sb02g038070
Vc9p318.12	UGT73C6(Vc9p318.12)	TFmatrixID_0211		720	+	tACACTg	C2H2	AT1G27730;AT3G49930;AT3G60580;AT5G04340;AT5G43170;Glyma04g04760.1;Glyma06g04840.1;Glyma14g09760.1;Glyma17g35430.1;Os03g0437200;Os12g0583700;POPTR_0001s30260;POPTR_0009s09250;POPTR_0014s01760;Sb01g031920;Sb02g038000;Sb02g038070
Vc9p318.12	UGT73C6(Vc9p318.12)	TFmatrixID_0211		1491	+	aACACTa	C2H2	AT1G27730;AT3G49930;AT3G60580;AT5G04340;AT5G43170;Glyma04g04760.1;Glyma06g04840.1;Glyma14g09760.1;Glyma17g35430.1;Os03g0437200;Os12g0583700;POPTR_0001s30260;POPTR_0009s09250;POPTR_0014s01760;Sb01g031920;Sb02g038000;Sb02g038070
Vc9p318.12	UGT73C6(Vc9p318.12)	TFmatrixID_0211		1728	-	cAGTGTg	C2H2	AT1G27730;AT3G49930;AT3G60580;AT5G04340;AT5G43170;Glyma04g04760.1;Glyma06g04840.1;Glyma14g09760.1;Glyma17g35430.1;Os03g0437200;Os12g0583700;POPTR_0001s30260;POPTR_0009s09250;POPTR_0014s01760;Sb01g031920;Sb02g038000;Sb02g038070
Vc9p318.12	UGT73C6(Vc9p318.12)	TFmatrixID_0213		227	+	cACACTt	C2H2	AT1G02030;AT2G45120;AT3G19580;AT3G49930;AT3G60580;AT5G04340;AT5G43170;Glyma01g18750.1;Glyma01g32990.1;Glyma02g48090.1;Glyma03g03950.1;Glyma04g04760.1;Glyma06g04840.1;Glyma14g09760.1;Glyma17g35430.1;Os03g0437100;Os03g0437200;Os12g0583700;POPTR_0001s30260;POPTR_0002s14460;POPTR_0009s09250;POPTR_0014s01760;Sb01g031920;Sb02g038000;Sb02g038070;AC185108.3_FG011
Vc9p318.12	UGT73C6(Vc9p318.12)	TFmatrixID_0213		720	+	tACACTg	C2H2	AT1G02030;AT2G45120;AT3G19580;AT3G49930;AT3G60580;AT5G04340;AT5G43170;Glyma01g18750.1;Glyma01g32990.1;Glyma02g48090.1;Glyma03g03950.1;Glyma04g04760.1;Glyma06g04840.1;Glyma14g09760.1;Glyma17g35430.1;Os03g0437100;Os03g0437200;Os12g0583700;POPTR_0001s30260;POPTR_0002s14460;POPTR_0009s09250;POPTR_0014s01760;Sb01g031920;Sb02g038000;Sb02g038070;AC185108.3_FG011
Vc9p318.12	UGT73C6(Vc9p318.12)	TFmatrixID_0213		1491	+	aACACTa	C2H2	AT1G02030;AT2G45120;AT3G19580;AT3G49930;AT3G60580;AT5G04340;AT5G43170;Glyma01g18750.1;Glyma01g32990.1;Glyma02g48090.1;Glyma03g03950.1;Glyma04g04760.1;Glyma06g04840.1;Glyma14g09760.1;Glyma17g35430.1;Os03g0437100;Os03g0437200;Os12g0583700;POPTR_0001s30260;POPTR_0002s14460;POPTR_0009s09250;POPTR_0014s01760;Sb01g031920;Sb02g038000;Sb02g038070;AC185108.3_FG011
Vc9p318.12	UGT73C6(Vc9p318.12)	TFmatrixID_0213		1728	-	cAGTGTg	C2H2	AT1G02030;AT2G45120;AT3G19580;AT3G49930;AT3G60580;AT5G04340;AT5G43170;Glyma01g18750.1;Glyma01g32990.1;Glyma02g48090.1;Glyma03g03950.1;Glyma04g04760.1;Glyma06g04840.1;Glyma14g09760.1;Glyma17g35430.1;Os03g0437100;Os03g0437200;Os12g0583700;POPTR_0001s30260;POPTR_0002s14460;POPTR_0009s09250;POPTR_0014s01760;Sb01g031920;Sb02g038000;Sb02g038070;AC185108.3_FG011
Vc9p318.12	UGT73C6(Vc9p318.12)	TFmatrixID_0214		717	+	taatACACTgtaa	C2H2	AT2G28710;AT2G37430;AT3G46070;AT3G46080;AT3G46090;Glyma02g10490.1;Glyma03g33050.1;Glyma03g33060.1;Glyma03g33070.1;Glyma10g05190.1;Glyma10g05210.1;Glyma10g43630.1;Glyma13g19550.1;Glyma13g19560.1;Glyma13g19570.1;Glyma13g40860.1;Glyma15g04570.1;Glyma18g52410.1;Glyma19g35740.1;Glyma19g35770.1;Glyma20g23180.1;Os01g0838600;Os01g0839100;Os03g0279700;Os03g0820300;Os05g0114400;Os05g0460900;POPTR_0001s2425…
Vc9p318.12	UGT73C6(Vc9p318.12)	TFmatrixID_0214		1488	+	cataACACTaact	C2H2	AT2G28710;AT2G37430;AT3G46070;AT3G46080;AT3G46090;Glyma02g10490.1;Glyma03g33050.1;Glyma03g33060.1;Glyma03g33070.1;Glyma10g05190.1;Glyma10g05210.1;Glyma10g43630.1;Glyma13g19550.1;Glyma13g19560.1;Glyma13g19570.1;Glyma13g40860.1;Glyma15g04570.1;Glyma18g52410.1;Glyma19g35740.1;Glyma19g35770.1;Glyma20g23180.1;Os01g0838600;Os01g0839100;Os03g0279700;Os03g0820300;Os05g0114400;Os05g0460900;POPTR_0001s2425…
Vc9p318.12	UGT73C6(Vc9p318.12)	TFmatrixID_0220		93	-	cctACGCGt	CG-1; CAMTA;CAMTA	AT2G22300;Glyma08g19100.1;Os03g0191000;Os07g0623100;Os10g0375600;POPTR_0005s07660;POPTR_0007s05410;Sb0012s010230;Sb01g033650;Sb01g044480;Sb02g039710;GRMZM2G341747
Vc9p318.12	UGT73C6(Vc9p318.12)	TFmatrixID_0220		96	+	aCGCGTaca	CG-1; CAMTA;CAMTA	AT2G22300;Glyma08g19100.1;Os03g0191000;Os07g0623100;Os10g0375600;POPTR_0005s07660;POPTR_0007s05410;Sb0012s010230;Sb01g033650;Sb01g044480;Sb02g039710;GRMZM2G341747
Vc9p318.12	UGT73C6(Vc9p318.12)	TFmatrixID_0223		187	-	ttcttAAATTttt	TCR; CPP	AT4G14770;Glyma01g44670.1;POPTR_0010s09350
Vc9p318.12	UGT73C6(Vc9p318.12)	TFmatrixID_0223		249	-	agttgAAATTttt	TCR; CPP	AT4G14770;Glyma01g44670.1;POPTR_0010s09350
Vc9p318.12	UGT73C6(Vc9p318.12)	TFmatrixID_0223		1296	-	ctctaAAATTtga	TCR; CPP	AT4G14770;Glyma01g44670.1;POPTR_0010s09350
Vc9p318.12	UGT73C6(Vc9p318.12)	TFmatrixID_0223		1299	+	taaAATTTgatga	TCR; CPP	AT4G14770;Glyma01g44670.1;POPTR_0010s09350
Vc9p318.12	UGT73C6(Vc9p318.12)	TFmatrixID_0223		1346	-	tatccAAATTtaa	TCR; CPP	AT4G14770;Glyma01g44670.1;POPTR_0010s09350
Vc9p318.12	UGT73C6(Vc9p318.12)	TFmatrixID_0223		1349	+	ccaAATTTaattc	TCR; CPP	AT4G14770;Glyma01g44670.1;POPTR_0010s09350
Vc9p318.12	UGT73C6(Vc9p318.12)	TFmatrixID_0223		1434	-	atctaAAATTtct	TCR; CPP	AT4G14770;Glyma01g44670.1;POPTR_0010s09350
Vc9p318.12	UGT73C6(Vc9p318.12)	TFmatrixID_0224		1287	+	tTTTAAat	TCR; CPP	AT2G20110;Glyma07g09380.1;Glyma08g04180.1;Glyma09g32420.1;Os01g0761100;POPTR_0006s16340;POPTR_0018s08960
Vc9p318.12	UGT73C6(Vc9p318.12)	TFmatrixID_0224		1287	-	ttTTAAAt	TCR; CPP	AT2G20110;Glyma07g09380.1;Glyma08g04180.1;Glyma09g32420.1;Os01g0761100;POPTR_0006s16340;POPTR_0018s08960
Vc9p318.12	UGT73C6(Vc9p318.12)	TFmatrixID_0224		1362	+	tTTTAAat	TCR; CPP	AT2G20110;Glyma07g09380.1;Glyma08g04180.1;Glyma09g32420.1;Os01g0761100;POPTR_0006s16340;POPTR_0018s08960
Vc9p318.12	UGT73C6(Vc9p318.12)	TFmatrixID_0224		1362	-	ttTTAAAt	TCR; CPP	AT2G20110;Glyma07g09380.1;Glyma08g04180.1;Glyma09g32420.1;Os01g0761100;POPTR_0006s16340;POPTR_0018s08960
Vc9p318.12	UGT73C6(Vc9p318.12)	TFmatrixID_0226		78	+	tTTTGAat	TCR; CPP	AT3G22760;AT3G22780;AT4G14770;Glyma01g44670.1;POPTR_0010s09350
Vc9p318.12	UGT73C6(Vc9p318.12)	TFmatrixID_0226		393	+	tTTTGAat	TCR; CPP	AT3G22760;AT3G22780;AT4G14770;Glyma01g44670.1;POPTR_0010s09350
Vc9p318.12	UGT73C6(Vc9p318.12)	TFmatrixID_0226		1094	+	tTTTGAat	TCR; CPP	AT3G22760;AT3G22780;AT4G14770;Glyma01g44670.1;POPTR_0010s09350
Vc9p318.12	UGT73C6(Vc9p318.12)	TFmatrixID_0227		77	+	ctTTTGAatg	TCR; CPP;CPP	AT4G29000;Glyma04g08670.1;Glyma06g08780.1;Glyma07g09380.1;Glyma08g04180.1;Glyma09g32420.1;Os01g0761100;POPTR_0006s16340;POPTR_0018s08960;GRMZM2G059678
Vc9p318.12	UGT73C6(Vc9p318.12)	TFmatrixID_0227		392	+	ctTTTGAatg	TCR; CPP;CPP	AT4G29000;Glyma04g08670.1;Glyma06g08780.1;Glyma07g09380.1;Glyma08g04180.1;Glyma09g32420.1;Os01g0761100;POPTR_0006s16340;POPTR_0018s08960;GRMZM2G059678
Vc9p318.12	UGT73C6(Vc9p318.12)	TFmatrixID_0227		1093	+	atTTTGAatc	TCR; CPP;CPP	AT4G29000;Glyma04g08670.1;Glyma06g08780.1;Glyma07g09380.1;Glyma08g04180.1;Glyma09g32420.1;Os01g0761100;POPTR_0006s16340;POPTR_0018s08960;GRMZM2G059678
Vc9p318.12	UGT73C6(Vc9p318.12)	TFmatrixID_0232		1135	+	aatAACGT	Dof	AT1G29160
Vc9p318.12	UGT73C6(Vc9p318.12)	TFmatrixID_0233		146	-	ccaCTTTTgg	Dof	AT1G64620
Vc9p318.12	UGT73C6(Vc9p318.12)	TFmatrixID_0233		228	-	acaCTTTTaa	Dof	AT1G64620
Vc9p318.12	UGT73C6(Vc9p318.12)	TFmatrixID_0233		322	+	ccAAAAGtgg	Dof	AT1G64620
Vc9p318.12	UGT73C6(Vc9p318.12)	TFmatrixID_0235		76	-	aCTTTTga	Dof	AT3G21270
Vc9p318.12	UGT73C6(Vc9p318.12)	TFmatrixID_0235		148	-	aCTTTTgg	Dof	AT3G21270
Vc9p318.12	UGT73C6(Vc9p318.12)	TFmatrixID_0235		230	-	aCTTTTaa	Dof	AT3G21270
Vc9p318.12	UGT73C6(Vc9p318.12)	TFmatrixID_0235		322	+	ccAAAAGt	Dof	AT3G21270
Vc9p318.12	UGT73C6(Vc9p318.12)	TFmatrixID_0236		1135	+	aaTAACGt	Dof	AT3G45610
Vc9p318.12	UGT73C6(Vc9p318.12)	TFmatrixID_0237		146	-	ccaCTTTTg	Dof	AT3G47500
Vc9p318.12	UGT73C6(Vc9p318.12)	TFmatrixID_0237		228	-	acaCTTTTa	Dof	AT3G47500
Vc9p318.12	UGT73C6(Vc9p318.12)	TFmatrixID_0237		323	+	cAAAAGtgg	Dof	AT3G47500
Vc9p318.12	UGT73C6(Vc9p318.12)	TFmatrixID_0238		230	-	aCTTTTaaa	Dof	AT4G38000
Vc9p318.12	UGT73C6(Vc9p318.12)	TFmatrixID_0238		597	+	tttTAAAGt	Dof	AT4G38000
Vc9p318.12	UGT73C6(Vc9p318.12)	TFmatrixID_0240		980	-	CTTTTtc	Dof	AT5G60200
Vc9p318.12	UGT73C6(Vc9p318.12)	TFmatrixID_0240		1382	-	CTTTTtc	Dof	AT5G60200
Vc9p318.12	UGT73C6(Vc9p318.12)	TFmatrixID_0241		1134	+	aaaTAACGtt	Dof	AT5G60850
Vc9p318.12	UGT73C6(Vc9p318.12)	TFmatrixID_0242		1134	+	aaatAACGTtt	Dof	AT5G60850
Vc9p318.12	UGT73C6(Vc9p318.12)	TFmatrixID_0242		1137	-	taACGTTtgtt	Dof	AT5G60850
Vc9p318.12	UGT73C6(Vc9p318.12)	TFmatrixID_0243		230	-	aCTTTTaa	Dof	AT5G62940
Vc9p318.12	UGT73C6(Vc9p318.12)	TFmatrixID_0254		346	+	tcggTACATtt	EIN3; EIL;EIL	AT1G73730;Glyma02g44220.1;Glyma05g31410.1;Glyma08g14630.1;Glyma13g03660.1;Glyma13g03700.1;Glyma14g04550.1;Glyma15g03650.1;Glyma18g02190.1;Glyma20g12250.1;Os03g0324200;Os03g0324300;Os07g0685700;Os08g0508700;POPTR_0001s05360;POPTR_0001s05370;POPTR_0003s22090;POPTR_0004s20830;POPTR_0008s01200;POPTR_0009s16080;POPTR_0010s25370;Sb01g036740;Sb02g028390;Sb02g043350;Sb07g027790;AC234203.1_FG011;GRMZM2G00…
Vc9p318.12	UGT73C6(Vc9p318.12)	TFmatrixID_0255		1584	+	aTGTATtta	EIN3; EIL;EIL	AT2G27050;AT5G21120;AT5G65100;Glyma02g44220.1;Glyma04g14900.1;Glyma05g31410.1;Glyma08g14630.1;Glyma13g03660.1;Glyma13g03700.1;Glyma14g04550.1;Glyma15g03650.1;Glyma18g02190.1;Glyma20g12250.1;Os03g0324200;Os03g0324300;Os07g0685700;Os08g0508700;POPTR_0001s05360;POPTR_0001s05370;POPTR_0003s22090;POPTR_0004s20830;POPTR_0008s01200;POPTR_0009s16080;POPTR_0010s25370;Sb01g036740;Sb02g028390;Sb02g043350;Sb…
Vc9p318.12	UGT73C6(Vc9p318.12)	TFmatrixID_0256		1807	+	taATGCAtga	EIN3; EIL;EIL	AT3G20770;AT5G21120;AT5G65100;Glyma02g44220.1;Glyma04g14900.1;Glyma05g31410.1;Glyma08g14630.1;Glyma13g03660.1;Glyma13g03700.1;Glyma14g04550.1;Glyma15g03650.1;Glyma18g02190.1;Glyma20g12250.1;Os03g0324200;Os03g0324300;Os07g0685700;Os08g0508700;POPTR_0001s05360;POPTR_0001s05370;POPTR_0003s22090;POPTR_0004s20830;POPTR_0008s01200;POPTR_0009s16080;POPTR_0010s25370;Sb01g036740;Sb02g028390;Sb02g043350;Sb…
Vc9p318.12	UGT73C6(Vc9p318.12)	TFmatrixID_0256		1807	-	taaTGCATga	EIN3; EIL;EIL	AT3G20770;AT5G21120;AT5G65100;Glyma02g44220.1;Glyma04g14900.1;Glyma05g31410.1;Glyma08g14630.1;Glyma13g03660.1;Glyma13g03700.1;Glyma14g04550.1;Glyma15g03650.1;Glyma18g02190.1;Glyma20g12250.1;Os03g0324200;Os03g0324300;Os07g0685700;Os08g0508700;POPTR_0001s05360;POPTR_0001s05370;POPTR_0003s22090;POPTR_0004s20830;POPTR_0008s01200;POPTR_0009s16080;POPTR_0010s25370;Sb01g036740;Sb02g028390;Sb02g043350;Sb…
Vc9p318.12	UGT73C6(Vc9p318.12)	TFmatrixID_0257		346	+	tcggTACATtt	EIN3;EIL	Glyma02g44220.1;Glyma05g31410.1;Glyma13g03660.1;Glyma13g03700.1;Glyma14g04550.1;Glyma15g03650.1;Glyma20g12250.1;Os03g0324200;Os03g0324300;Os07g0685700;Os08g0508700;Os09g0490200;POPTR_0001s05360;POPTR_0001s05370;POPTR_0003s22090;POPTR_0004s20830;POPTR_0008s01200;POPTR_0009s16080;POPTR_0010s25370;Sb01g036740;Sb02g028390;Sb02g043350;Sb07g027790;AC234203.1_FG011;GRMZM2G003558;GRMZM2G006752;GRMZM2G033…
Vc9p318.12	UGT73C6(Vc9p318.12)	TFmatrixID_0259		1077	+	ctGATCTa	GATA; tify	AT1G08000;AT2G28340;AT2G45050;AT5G25830;AT5G66320;Glyma01g37450.1;Glyma02g05710.1;Glyma02g07850.1;Glyma02g08150.1;Glyma03g27250.1;Glyma04g01090.1;Glyma04g08990.1;Glyma06g01110.1;Glyma06g09080.1;Glyma07g01960.1;Glyma07g14750.1;Glyma10g25480.1;Glyma10g35470.1;Glyma11g11930.1;Glyma11g20480.1;Glyma12g04180.1;Glyma12g08130.1;Glyma12g29730.1;Glyma13g40020.1;Glyma14g22460.1;Glyma16g04670.1;Glyma16g24390…
Vc9p318.12	UGT73C6(Vc9p318.12)	TFmatrixID_0262		1526	+	taTGATCgt	GATA	AT3G06740;AT3G16870;AT4G16141;AT4G26150;AT5G26930;AT5G49300;AT5G56860;Glyma03g39220.1;Glyma04g05430.1;Glyma09g07090.1;Glyma13g00200.1;Glyma14g10830.1;Glyma15g18380.1;Glyma17g03410.1;Glyma17g06290.1;Glyma17g34670.1;Glyma19g41780.1;Os01g0976800;Os02g0220400;Os03g0831200;Os05g0155400;Os05g0578900;Os06g0571800;POPTR_0005s02040;POPTR_0006s24560;POPTR_0008s22950;POPTR_0010s00360;POPTR_0014s11940;POPTR_…
Vc9p318.12	UGT73C6(Vc9p318.12)	TFmatrixID_0263		945	-	ttGATCT	GATA;Dof	AT3G21175;AT4G24470;Glyma02g37980.1;Glyma04g10330.1;Glyma04g10340.1;Glyma06g10280.1;Glyma06g10290.1;Glyma07g30140.1;Glyma08g07170.1;Glyma08g23720.1;Glyma14g36150.1;Os03g0684000;Os02g0148500;Os03g0734900;POPTR_0002s11140;POPTR_0002s11150;POPTR_0005s19550;POPTR_0007s03120;POPTR_0010s25810;POPTR_0017s06970;POPTR_0017s06980;Sb01g011840;Sb10g028750;GRMZM2G058479;GRMZM2G065896;GRMZM2G080509
Vc9p318.12	UGT73C6(Vc9p318.12)	TFmatrixID_0264		341	+	gcAGATCggt	GATA; tify	AT2G45050;AT3G24050;AT5G25830;AT5G66320;Glyma01g37450.1;Glyma02g05710.1;Glyma02g07850.1;Glyma02g08150.1;Glyma03g27250.1;Glyma04g01090.1;Glyma04g08990.1;Glyma06g01110.1;Glyma06g09080.1;Glyma07g01960.1;Glyma07g14750.1;Glyma10g25480.1;Glyma10g35470.1;Glyma11g11930.1;Glyma11g20480.1;Glyma12g04180.1;Glyma12g08130.1;Glyma12g29730.1;Glyma13g40020.1;Glyma14g22460.1;Glyma16g04670.1;Glyma16g24390.1;Glyma16…
Vc9p318.12	UGT73C6(Vc9p318.12)	TFmatrixID_0264		1076	-	tctGATCTac	GATA; tify	AT2G45050;AT3G24050;AT5G25830;AT5G66320;Glyma01g37450.1;Glyma02g05710.1;Glyma02g07850.1;Glyma02g08150.1;Glyma03g27250.1;Glyma04g01090.1;Glyma04g08990.1;Glyma06g01110.1;Glyma06g09080.1;Glyma07g01960.1;Glyma07g14750.1;Glyma10g25480.1;Glyma10g35470.1;Glyma11g11930.1;Glyma11g20480.1;Glyma12g04180.1;Glyma12g08130.1;Glyma12g29730.1;Glyma13g40020.1;Glyma14g22460.1;Glyma16g04670.1;Glyma16g24390.1;Glyma16…
Vc9p318.12	UGT73C6(Vc9p318.12)	TFmatrixID_0265		342	+	cAGATCggta	GATA; tify	AT2G45050;AT3G45170;AT3G51080;AT5G25830;AT5G66320;Glyma01g37450.1;Glyma02g05710.1;Glyma02g07850.1;Glyma02g08150.1;Glyma03g27250.1;Glyma04g01090.1;Glyma04g08990.1;Glyma06g01110.1;Glyma06g09080.1;Glyma07g01960.1;Glyma07g14750.1;Glyma10g25480.1;Glyma10g35470.1;Glyma11g11930.1;Glyma11g20480.1;Glyma12g04180.1;Glyma12g08130.1;Glyma12g29730.1;Glyma13g40020.1;Glyma14g22460.1;Glyma16g04670.1;Glyma16g24390…
Vc9p318.12	UGT73C6(Vc9p318.12)	TFmatrixID_0265		943	-	aattGATCTc	GATA; tify	AT2G45050;AT3G45170;AT3G51080;AT5G25830;AT5G66320;Glyma01g37450.1;Glyma02g05710.1;Glyma02g07850.1;Glyma02g08150.1;Glyma03g27250.1;Glyma04g01090.1;Glyma04g08990.1;Glyma06g01110.1;Glyma06g09080.1;Glyma07g01960.1;Glyma07g14750.1;Glyma10g25480.1;Glyma10g35470.1;Glyma11g11930.1;Glyma11g20480.1;Glyma12g04180.1;Glyma12g08130.1;Glyma12g29730.1;Glyma13g40020.1;Glyma14g22460.1;Glyma16g04670.1;Glyma16g24390…
Vc9p318.12	UGT73C6(Vc9p318.12)	TFmatrixID_0265		1075	-	ctctGATCTa	GATA; tify	AT2G45050;AT3G45170;AT3G51080;AT5G25830;AT5G66320;Glyma01g37450.1;Glyma02g05710.1;Glyma02g07850.1;Glyma02g08150.1;Glyma03g27250.1;Glyma04g01090.1;Glyma04g08990.1;Glyma06g01110.1;Glyma06g09080.1;Glyma07g01960.1;Glyma07g14750.1;Glyma10g25480.1;Glyma10g35470.1;Glyma11g11930.1;Glyma11g20480.1;Glyma12g04180.1;Glyma12g08130.1;Glyma12g29730.1;Glyma13g40020.1;Glyma14g22460.1;Glyma16g04670.1;Glyma16g24390…
Vc9p318.12	UGT73C6(Vc9p318.12)	TFmatrixID_0265		1735	+	aAGATCagga	GATA; tify	AT2G45050;AT3G45170;AT3G51080;AT5G25830;AT5G66320;Glyma01g37450.1;Glyma02g05710.1;Glyma02g07850.1;Glyma02g08150.1;Glyma03g27250.1;Glyma04g01090.1;Glyma04g08990.1;Glyma06g01110.1;Glyma06g09080.1;Glyma07g01960.1;Glyma07g14750.1;Glyma10g25480.1;Glyma10g35470.1;Glyma11g11930.1;Glyma11g20480.1;Glyma12g04180.1;Glyma12g08130.1;Glyma12g29730.1;Glyma13g40020.1;Glyma14g22460.1;Glyma16g04670.1;Glyma16g24390…
Vc9p318.12	UGT73C6(Vc9p318.12)	TFmatrixID_0266		341	-	gcAGATCgg	GATA; tify	AT2G28340;AT2G45050;AT3G54810;AT5G25830;AT5G66320;Glyma01g37450.1;Glyma02g05710.1;Glyma02g07850.1;Glyma02g08150.1;Glyma03g27250.1;Glyma04g01090.1;Glyma04g08990.1;Glyma06g01110.1;Glyma06g09080.1;Glyma07g01960.1;Glyma07g14750.1;Glyma10g25480.1;Glyma10g35470.1;Glyma11g11930.1;Glyma11g20480.1;Glyma12g04180.1;Glyma12g08130.1;Glyma12g29730.1;Glyma13g40020.1;Glyma14g22460.1;Glyma16g04670.1;Glyma16g24390…
Vc9p318.12	UGT73C6(Vc9p318.12)	TFmatrixID_0266		1077	+	ctGATCTac	GATA; tify	AT2G28340;AT2G45050;AT3G54810;AT5G25830;AT5G66320;Glyma01g37450.1;Glyma02g05710.1;Glyma02g07850.1;Glyma02g08150.1;Glyma03g27250.1;Glyma04g01090.1;Glyma04g08990.1;Glyma06g01110.1;Glyma06g09080.1;Glyma07g01960.1;Glyma07g14750.1;Glyma10g25480.1;Glyma10g35470.1;Glyma11g11930.1;Glyma11g20480.1;Glyma12g04180.1;Glyma12g08130.1;Glyma12g29730.1;Glyma13g40020.1;Glyma14g22460.1;Glyma16g04670.1;Glyma16g24390…
Vc9p318.12	UGT73C6(Vc9p318.12)	TFmatrixID_0267		341	+	gcAGATCggt	GATA; tify	AT2G28340;AT2G45050;AT3G60530;AT5G25830;AT5G66320;Glyma01g37450.1;Glyma02g05710.1;Glyma02g07850.1;Glyma02g08150.1;Glyma03g27250.1;Glyma04g01090.1;Glyma04g08990.1;Glyma06g01110.1;Glyma06g09080.1;Glyma07g01960.1;Glyma07g14750.1;Glyma10g25480.1;Glyma10g35470.1;Glyma11g11930.1;Glyma11g20480.1;Glyma12g04180.1;Glyma12g08130.1;Glyma12g29730.1;Glyma13g40020.1;Glyma14g22460.1;Glyma16g04670.1;Glyma16g24390…
Vc9p318.12	UGT73C6(Vc9p318.12)	TFmatrixID_0267		1076	-	tctGATCTac	GATA; tify	AT2G28340;AT2G45050;AT3G60530;AT5G25830;AT5G66320;Glyma01g37450.1;Glyma02g05710.1;Glyma02g07850.1;Glyma02g08150.1;Glyma03g27250.1;Glyma04g01090.1;Glyma04g08990.1;Glyma06g01110.1;Glyma06g09080.1;Glyma07g01960.1;Glyma07g14750.1;Glyma10g25480.1;Glyma10g35470.1;Glyma11g11930.1;Glyma11g20480.1;Glyma12g04180.1;Glyma12g08130.1;Glyma12g29730.1;Glyma13g40020.1;Glyma14g22460.1;Glyma16g04670.1;Glyma16g24390…
Vc9p318.12	UGT73C6(Vc9p318.12)	TFmatrixID_0268		340	-	agcaGATCGg	GATA	AT4G17570;Glyma01g41370.1;Glyma05g05320.1;Glyma11g04060.1;Glyma17g15610.1;Os04g0544500;POPTR_0001s15170;POPTR_0003s08080;Sb01g011980;Sb06g024200;GRMZM2G077002;GRMZM2G421212
Vc9p318.12	UGT73C6(Vc9p318.12)	TFmatrixID_0268		1525	-	ctatGATCGt	GATA	AT4G17570;Glyma01g41370.1;Glyma05g05320.1;Glyma11g04060.1;Glyma17g15610.1;Os04g0544500;POPTR_0001s15170;POPTR_0003s08080;Sb01g011980;Sb06g024200;GRMZM2G077002;GRMZM2G421212
Vc9p318.12	UGT73C6(Vc9p318.12)	TFmatrixID_0268		1745	-	tgtgGATCGg	GATA	AT4G17570;Glyma01g41370.1;Glyma05g05320.1;Glyma11g04060.1;Glyma17g15610.1;Os04g0544500;POPTR_0001s15170;POPTR_0003s08080;Sb01g011980;Sb06g024200;GRMZM2G077002;GRMZM2G421212
Vc9p318.12	UGT73C6(Vc9p318.12)	TFmatrixID_0270		342	+	cAGATCggta	GATA; tify	AT2G28340;AT2G45050;AT4G34680;AT5G25830;AT5G66320;Glyma01g37450.1;Glyma02g05710.1;Glyma02g07850.1;Glyma02g08150.1;Glyma03g27250.1;Glyma04g01090.1;Glyma04g08990.1;Glyma06g01110.1;Glyma06g09080.1;Glyma07g01960.1;Glyma07g14750.1;Glyma10g25480.1;Glyma10g35470.1;Glyma11g11930.1;Glyma11g20480.1;Glyma12g04180.1;Glyma12g08130.1;Glyma12g29730.1;Glyma13g40020.1;Glyma14g22460.1;Glyma16g04670.1;Glyma16g24390…
Vc9p318.12	UGT73C6(Vc9p318.12)	TFmatrixID_0270		1075	-	ctctGATCTa	GATA; tify	AT2G28340;AT2G45050;AT4G34680;AT5G25830;AT5G66320;Glyma01g37450.1;Glyma02g05710.1;Glyma02g07850.1;Glyma02g08150.1;Glyma03g27250.1;Glyma04g01090.1;Glyma04g08990.1;Glyma06g01110.1;Glyma06g09080.1;Glyma07g01960.1;Glyma07g14750.1;Glyma10g25480.1;Glyma10g35470.1;Glyma11g11930.1;Glyma11g20480.1;Glyma12g04180.1;Glyma12g08130.1;Glyma12g29730.1;Glyma13g40020.1;Glyma14g22460.1;Glyma16g04670.1;Glyma16g24390…
Vc9p318.12	UGT73C6(Vc9p318.12)	TFmatrixID_0271		341	-	gcAGATCggt	GATA; tify	AT2G45050;AT3G45170;AT4G36240;AT5G25830;AT5G66320;Glyma01g37450.1;Glyma02g05710.1;Glyma02g07850.1;Glyma02g08150.1;Glyma03g27250.1;Glyma04g01090.1;Glyma04g08990.1;Glyma06g01110.1;Glyma06g09080.1;Glyma07g01960.1;Glyma07g14750.1;Glyma10g25480.1;Glyma10g35470.1;Glyma11g11930.1;Glyma11g20480.1;Glyma12g04180.1;Glyma12g08130.1;Glyma12g29730.1;Glyma13g40020.1;Glyma14g22460.1;Glyma16g04670.1;Glyma16g24390…
Vc9p318.12	UGT73C6(Vc9p318.12)	TFmatrixID_0271		1076	+	tctGATCTac	GATA; tify	AT2G45050;AT3G45170;AT4G36240;AT5G25830;AT5G66320;Glyma01g37450.1;Glyma02g05710.1;Glyma02g07850.1;Glyma02g08150.1;Glyma03g27250.1;Glyma04g01090.1;Glyma04g08990.1;Glyma06g01110.1;Glyma06g09080.1;Glyma07g01960.1;Glyma07g14750.1;Glyma10g25480.1;Glyma10g35470.1;Glyma11g11930.1;Glyma11g20480.1;Glyma12g04180.1;Glyma12g08130.1;Glyma12g29730.1;Glyma13g40020.1;Glyma14g22460.1;Glyma16g04670.1;Glyma16g24390…
Vc9p318.12	UGT73C6(Vc9p318.12)	TFmatrixID_0272		1526	-	tatGATCGt	GATA	AT5G47140;Glyma01g41370.1;Glyma05g05320.1;Glyma11g04060.1;Glyma17g15610.1;Os04g0544500;POPTR_0001s15170;POPTR_0003s08080;Sb01g011980;Sb06g024200;GRMZM2G077002;GRMZM2G421212
Vc9p318.12	UGT73C6(Vc9p318.12)	TFmatrixID_0279		1118	-	tgTTCATa	Homeodomain;HB-other	AT1G28420;AT5G44180;Glyma06g44290.1;Glyma07g32180.1;Glyma13g24370.1;Glyma13g30860.1;Os01g0672201;Os05g0562400;POPTR_0004s04840;POPTR_0007s01330;POPTR_0011s05660;POPTR_0017s04760;Sb03g030770;Sb03g030782;GRMZM2G060541;GRMZM2G159357
Vc9p318.12	UGT73C6(Vc9p318.12)	TFmatrixID_0282		515	+	gaaaaTATTAtca	Homeodomain; HD-ZIP	AT2G36610;Glyma10g07440.1;Glyma13g21330.1
Vc9p318.12	UGT73C6(Vc9p318.12)	TFmatrixID_0282		697	+	ccgaaTATTAtta	Homeodomain; HD-ZIP	AT2G36610;Glyma10g07440.1;Glyma13g21330.1
Vc9p318.12	UGT73C6(Vc9p318.12)	TFmatrixID_0282		832	+	tcctaTATTAttt	Homeodomain; HD-ZIP	AT2G36610;Glyma10g07440.1;Glyma13g21330.1
Vc9p318.12	UGT73C6(Vc9p318.12)	TFmatrixID_0282		1059	+	ttctaTATTAttt	Homeodomain; HD-ZIP	AT2G36610;Glyma10g07440.1;Glyma13g21330.1
Vc9p318.12	UGT73C6(Vc9p318.12)	TFmatrixID_0283		197	+	tttTGATTga	Homeodomain; HD-ZIP;HD-ZIP	AT2G22800;AT2G44910;AT4G16780;AT4G37790;AT5G06710;AT5G47370;Glyma0041s00350.1;Glyma01g40450.1;Glyma02g28860.1;Glyma03g26700.1;Glyma03g30200.1;Glyma04g05200.1;Glyma05g04990.1;Glyma05g23150.1;Glyma07g14270.1;Glyma07g34230.1;Glyma08g15780.1;Glyma09g16790.1;Glyma09g37680.1;Glyma11g03850.1;Glyma11g04840.1;Glyma13g00310.1;Glyma14g10370.1;Glyma15g18320.1;Glyma15g42380.1;Glyma17g06380.1;Glyma17g15380.1;G…
Vc9p318.12	UGT73C6(Vc9p318.12)	TFmatrixID_0283		1306	+	tgaTGATTat	Homeodomain; HD-ZIP;HD-ZIP	AT2G22800;AT2G44910;AT4G16780;AT4G37790;AT5G06710;AT5G47370;Glyma0041s00350.1;Glyma01g40450.1;Glyma02g28860.1;Glyma03g26700.1;Glyma03g30200.1;Glyma04g05200.1;Glyma05g04990.1;Glyma05g23150.1;Glyma07g14270.1;Glyma07g34230.1;Glyma08g15780.1;Glyma09g16790.1;Glyma09g37680.1;Glyma11g03850.1;Glyma11g04840.1;Glyma13g00310.1;Glyma14g10370.1;Glyma15g18320.1;Glyma15g42380.1;Glyma17g06380.1;Glyma17g15380.1;G…
Vc9p318.12	UGT73C6(Vc9p318.12)	TFmatrixID_0283		1854	-	ccAATCAaac	Homeodomain; HD-ZIP;HD-ZIP	AT2G22800;AT2G44910;AT4G16780;AT4G37790;AT5G06710;AT5G47370;Glyma0041s00350.1;Glyma01g40450.1;Glyma02g28860.1;Glyma03g26700.1;Glyma03g30200.1;Glyma04g05200.1;Glyma05g04990.1;Glyma05g23150.1;Glyma07g14270.1;Glyma07g34230.1;Glyma08g15780.1;Glyma09g16790.1;Glyma09g37680.1;Glyma11g03850.1;Glyma11g04840.1;Glyma13g00310.1;Glyma14g10370.1;Glyma15g18320.1;Glyma15g42380.1;Glyma17g06380.1;Glyma17g15380.1;G…
Vc9p318.12	UGT73C6(Vc9p318.12)	TFmatrixID_0284		197	+	tttTGATTga	Homeodomain; HD-ZIP;HD-ZIP	AT2G46680;Glyma04g40960.1;Glyma06g13890.1;Glyma16g02390.1;Glyma19g44800.1;POPTR_0001s11380;POPTR_0002s17680;POPTR_0012s03080;POPTR_0014s09860;Sb02g030660;GRMZM2G034113;GRMZM2G041462
Vc9p318.12	UGT73C6(Vc9p318.12)	TFmatrixID_0284		481	+	caaTGATTta	Homeodomain; HD-ZIP;HD-ZIP	AT2G46680;Glyma04g40960.1;Glyma06g13890.1;Glyma16g02390.1;Glyma19g44800.1;POPTR_0001s11380;POPTR_0002s17680;POPTR_0012s03080;POPTR_0014s09860;Sb02g030660;GRMZM2G034113;GRMZM2G041462
Vc9p318.12	UGT73C6(Vc9p318.12)	TFmatrixID_0284		1854	-	ccAATCAaac	Homeodomain; HD-ZIP;HD-ZIP	AT2G46680;Glyma04g40960.1;Glyma06g13890.1;Glyma16g02390.1;Glyma19g44800.1;POPTR_0001s11380;POPTR_0002s17680;POPTR_0012s03080;POPTR_0014s09860;Sb02g030660;GRMZM2G034113;GRMZM2G041462
Vc9p318.12	UGT73C6(Vc9p318.12)	TFmatrixID_0285		218	-	tttgGTTTAc	Homeodomain; HB-PHD	AT3G19510
Vc9p318.12	UGT73C6(Vc9p318.12)	TFmatrixID_0286		199	+	tTGATTga	Homeodomain; HD-ZIP;HD-ZIP	AT2G22800;AT3G60390;AT4G16780;AT4G37790;AT5G06710;AT5G47370;Glyma0041s00350.1;Glyma01g40450.1;Glyma02g28860.1;Glyma03g26700.1;Glyma03g30200.1;Glyma04g05200.1;Glyma05g04990.1;Glyma05g23150.1;Glyma07g14270.1;Glyma07g34230.1;Glyma08g15780.1;Glyma09g07050.1;Glyma09g16790.1;Glyma09g37680.1;Glyma11g03850.1;Glyma11g04840.1;Glyma13g00310.1;Glyma14g10370.1;Glyma15g18320.1;Glyma15g42380.1;Glyma17g06380.1;G…
Vc9p318.12	UGT73C6(Vc9p318.12)	TFmatrixID_0286		1854	-	ccAATCAa	Homeodomain; HD-ZIP;HD-ZIP	AT2G22800;AT3G60390;AT4G16780;AT4G37790;AT5G06710;AT5G47370;Glyma0041s00350.1;Glyma01g40450.1;Glyma02g28860.1;Glyma03g26700.1;Glyma03g30200.1;Glyma04g05200.1;Glyma05g04990.1;Glyma05g23150.1;Glyma07g14270.1;Glyma07g34230.1;Glyma08g15780.1;Glyma09g07050.1;Glyma09g16790.1;Glyma09g37680.1;Glyma11g03850.1;Glyma11g04840.1;Glyma13g00310.1;Glyma14g10370.1;Glyma15g18320.1;Glyma15g42380.1;Glyma17g06380.1;G…
Vc9p318.12	UGT73C6(Vc9p318.12)	TFmatrixID_0288		685	-	taaATTAAtct	Homeodomain; HD-ZIP;HD-ZIP	AT1G05230;AT1G17920;AT3G61150;AT4G00730;AT5G46880;Glyma01g01850.1;Glyma01g45070.1;Glyma03g01860.1;Glyma05g33520.1;Glyma06g46000.1;Glyma08g06190.1;Glyma09g26600.1;Glyma09g29810.1;Glyma09g34070.1;Glyma09g40130.1;Glyma10g38280.1;Glyma12g10710.1;Glyma12g32050.1;Glyma13g38430.1;Glyma13g43350.1;Glyma15g01960.1;Glyma16g32130.1;Glyma16g34350.1;Glyma18g45970.1;Glyma20g29580.1;Glyma07g08340.1;Os02g0674800;…
Vc9p318.12	UGT73C6(Vc9p318.12)	TFmatrixID_0289		481	+	caaTGATTta	Homeodomain; HD-ZIP;HD-ZIP	AT2G22800;AT4G16780;AT4G17460;AT4G37790;AT5G06710;AT5G47370;Glyma0041s00350.1;Glyma01g40450.1;Glyma02g28860.1;Glyma03g26700.1;Glyma03g30200.1;Glyma04g05200.1;Glyma05g04990.1;Glyma05g23150.1;Glyma07g14270.1;Glyma08g15780.1;Glyma09g16790.1;Glyma09g37680.1;Glyma11g03850.1;Glyma11g04840.1;Glyma13g00310.1;Glyma14g10370.1;Glyma15g18320.1;Glyma15g42380.1;Glyma17g06380.1;Glyma17g15380.1;Glyma17g16930.1;G…
Vc9p318.12	UGT73C6(Vc9p318.12)	TFmatrixID_0289		1306	+	tgaTGATTat	Homeodomain; HD-ZIP;HD-ZIP	AT2G22800;AT4G16780;AT4G17460;AT4G37790;AT5G06710;AT5G47370;Glyma0041s00350.1;Glyma01g40450.1;Glyma02g28860.1;Glyma03g26700.1;Glyma03g30200.1;Glyma04g05200.1;Glyma05g04990.1;Glyma05g23150.1;Glyma07g14270.1;Glyma08g15780.1;Glyma09g16790.1;Glyma09g37680.1;Glyma11g03850.1;Glyma11g04840.1;Glyma13g00310.1;Glyma14g10370.1;Glyma15g18320.1;Glyma15g42380.1;Glyma17g06380.1;Glyma17g15380.1;Glyma17g16930.1;G…
Vc9p318.12	UGT73C6(Vc9p318.12)	TFmatrixID_0291		199	+	tTGATTga	Homeodomain; bZIP; HD-ZIP; WOX;WOX	AT4G35550;Glyma02g10410.1;Glyma04g01830.1;Glyma06g01940.1;Glyma10g43580.1;Glyma18g52490.1;Glyma20g23220.1;Os01g0818400;POPTR_0002s00980;POPTR_0005s10480;POPTR_0005s27410;Sb03g038080;AC218972.3_FG005;GRMZM2G069274
Vc9p318.12	UGT73C6(Vc9p318.12)	TFmatrixID_0291		1854	-	ccAATCAa	Homeodomain; bZIP; HD-ZIP; WOX;WOX	AT4G35550;Glyma02g10410.1;Glyma04g01830.1;Glyma06g01940.1;Glyma10g43580.1;Glyma18g52490.1;Glyma20g23220.1;Os01g0818400;POPTR_0002s00980;POPTR_0005s10480;POPTR_0005s27410;Sb03g038080;AC218972.3_FG005;GRMZM2G069274
Vc9p318.12	UGT73C6(Vc9p318.12)	TFmatrixID_0295		199	+	tTGATTgaaa	Homeodomain; HD-ZIP;HD-ZIP	Glyma04g40960.1;Glyma06g13890.1;Glyma16g02390.1;Glyma19g44800.1;Os02g0649300;Os04g0541700;Os09g0528200;POPTR_0002s17680;POPTR_0012s03080;POPTR_0014s09860;Sb02g030660;Sb04g033380;Sb06g024000;GRMZM2G034113;GRMZM2G041462;GRMZM2G117164;GRMZM2G351330
Vc9p318.12	UGT73C6(Vc9p318.12)	TFmatrixID_0295		1852	-	ccccAATCAa	Homeodomain; HD-ZIP;HD-ZIP	Glyma04g40960.1;Glyma06g13890.1;Glyma16g02390.1;Glyma19g44800.1;Os02g0649300;Os04g0541700;Os09g0528200;POPTR_0002s17680;POPTR_0012s03080;POPTR_0014s09860;Sb02g030660;Sb04g033380;Sb06g024000;GRMZM2G034113;GRMZM2G041462;GRMZM2G117164;GRMZM2G351330
Vc9p318.12	UGT73C6(Vc9p318.12)	TFmatrixID_0296		658	+	acTAATCtaa	Homeodomain; ZF-HD;ZF-HD	Os02g0706600;Sb04g030480;GRMZM2G069365
Vc9p318.12	UGT73C6(Vc9p318.12)	TFmatrixID_0296		688	+	atTAATCtac	Homeodomain; ZF-HD;ZF-HD	Os02g0706600;Sb04g030480;GRMZM2G069365
Vc9p318.12	UGT73C6(Vc9p318.12)	TFmatrixID_0296		1069	+	ttTAATCtct	Homeodomain; ZF-HD;ZF-HD	Os02g0706600;Sb04g030480;GRMZM2G069365
Vc9p318.12	UGT73C6(Vc9p318.12)	TFmatrixID_0296		1268	-	atgGATTAat	Homeodomain; ZF-HD;ZF-HD	Os02g0706600;Sb04g030480;GRMZM2G069365
Vc9p318.12	UGT73C6(Vc9p318.12)	TFmatrixID_0296		1829	+	caTAATCaca	Homeodomain; ZF-HD;ZF-HD	Os02g0706600;Sb04g030480;GRMZM2G069365
Vc9p318.12	UGT73C6(Vc9p318.12)	TFmatrixID_0299		199	+	tTGATTga	Homeodomain; WOX;WOX	AT1G20700;AT1G20710;Glyma02g10410.1;Glyma04g01830.1;Glyma06g01940.1;Glyma10g43580.1;Glyma18g52490.1;Glyma20g23220.1;Os01g0818400;POPTR_0002s00980;POPTR_0005s10480;POPTR_0005s27410;Sb03g038080;AC218972.3_FG005;GRMZM2G038252;GRMZM2G069274
Vc9p318.12	UGT73C6(Vc9p318.12)	TFmatrixID_0299		1854	-	ccAATCAa	Homeodomain; WOX;WOX	AT1G20700;AT1G20710;Glyma02g10410.1;Glyma04g01830.1;Glyma06g01940.1;Glyma10g43580.1;Glyma18g52490.1;Glyma20g23220.1;Os01g0818400;POPTR_0002s00980;POPTR_0005s10480;POPTR_0005s27410;Sb03g038080;AC218972.3_FG005;GRMZM2G038252;GRMZM2G069274
Vc9p318.12	UGT73C6(Vc9p318.12)	TFmatrixID_0300		425	-	cgaCGTCAca	Homeodomain; TALE;TALE	AT1G62360;AT1G70510;AT4G08150;Glyma0041s00360.1;Glyma01g03450.1;Glyma02g04190.1;Glyma03g39040.1;Glyma07g39350.1;Glyma08g39170.1;Glyma09g01000.1;Glyma10g28820.1;Glyma14g10430.1;Glyma15g11850.1;Glyma17g01370.1;Glyma18g20460.1;Glyma19g41610.1;Glyma20g22980.1;Os01g0302500;Os03g0673000;Os03g0727000;Os05g0129700;Os07g0129700;POPTR_0002s11400;POPTR_0004s00650;POPTR_0008s19290;POPTR_0010s05340;POPTR_0011…
Vc9p318.12	UGT73C6(Vc9p318.12)	TFmatrixID_0305		49	+	tGGTTAaa	MADF; Trihelix	AT1G13450;Glyma18g01360.1;POPTR_0008s17980;POPTR_0010s06510
Vc9p318.12	UGT73C6(Vc9p318.12)	TFmatrixID_0306		46	-	tgctGGTTAa	MADF; Trihelix	AT3G25990;Glyma18g01360.1
Vc9p318.12	UGT73C6(Vc9p318.12)	TFmatrixID_0308		1845	-	aaaaaACCCCcaa	MADF	Glyma18g01360.1
Vc9p318.12	UGT73C6(Vc9p318.12)	TFmatrixID_0312		46	+	tgctGGTTAa	MADF;Trihelix	Os04g0486400;Sb06g020670;GRMZM2G047370
Vc9p318.12	UGT73C6(Vc9p318.12)	TFmatrixID_0315		46	-	tgctGGTTAa	MADF	Glyma18g01360.1;POPTR_0008s17980;POPTR_0010s06510
Vc9p318.12	UGT73C6(Vc9p318.12)	TFmatrixID_0316		46	+	tgctGGTTAa	MADF;Trihelix	Glyma11g37390.1;Glyma18g01360.1;POPTR_0008s17980;POPTR_0010s06510;Sb06g020670;GRMZM2G047370
Vc9p318.12	UGT73C6(Vc9p318.12)	TFmatrixID_0317		46	+	tgctGGTTAa	MADF;Trihelix	Glyma18g01360.1;POPTR_0008s17980;POPTR_0010s06510;GRMZM2G047370
Vc9p318.12	UGT73C6(Vc9p318.12)	TFmatrixID_0318		46	+	tgctGGTTAa	MADF	Glyma18g01360.1;MDP0000164819;POPTR_0008s17980;POPTR_0010s06510
Vc9p318.12	UGT73C6(Vc9p318.12)	TFmatrixID_0319		907	-	ctTATCCaat	Myb/SANT;MYB-related	AT3G16350;Glyma01g00600.1;Glyma05g04950.1;Glyma13g43120.1;Glyma15g02250.1;Glyma17g15330.1;Glyma18g31990.1;Os01g0187900;Os10g0561400;POPTR_0001s15510;POPTR_0001s19070;POPTR_0003s07720;Sb01g029020;Sb03g003270;Sb07g003170;GRMZM2G034110;GRMZM2G400489
Vc9p318.12	UGT73C6(Vc9p318.12)	TFmatrixID_0320		785	+	gtGATATtt	Myb/SANT; MYB-related;MYB-related	AT1G01520;AT3G09600;AT4G01280;AT5G02840;AT5G52660;Glyma03g33440.1;Glyma07g07200.1;Glyma09g24400.1;Glyma10g05560.1;Glyma10g37520.1;Glyma13g19910.1;Glyma16g03640.1;Glyma16g29740.1;Glyma18g47230.1;Glyma19g36170.1;Glyma20g30250.1;Os02g0680700;Os06g0105800;Os06g0669700;POPTR_0002s16460;POPTR_0004s07160;POPTR_0006s13530;POPTR_0014s08520;POPTR_0016s08470;POPTR_0017s01140;Sb04g031820;Sb10g000590;AC209374…
Vc9p318.12	UGT73C6(Vc9p318.12)	TFmatrixID_0320		1274	-	taATATCtc	Myb/SANT; MYB-related;MYB-related	AT1G01520;AT3G09600;AT4G01280;AT5G02840;AT5G52660;Glyma03g33440.1;Glyma07g07200.1;Glyma09g24400.1;Glyma10g05560.1;Glyma10g37520.1;Glyma13g19910.1;Glyma16g03640.1;Glyma16g29740.1;Glyma18g47230.1;Glyma19g36170.1;Glyma20g30250.1;Os02g0680700;Os06g0105800;Os06g0669700;POPTR_0002s16460;POPTR_0004s07160;POPTR_0006s13530;POPTR_0014s08520;POPTR_0016s08470;POPTR_0017s01140;Sb04g031820;Sb10g000590;AC209374…
Vc9p318.12	UGT73C6(Vc9p318.12)	TFmatrixID_0320		1343	-	aaATATCca	Myb/SANT; MYB-related;MYB-related	AT1G01520;AT3G09600;AT4G01280;AT5G02840;AT5G52660;Glyma03g33440.1;Glyma07g07200.1;Glyma09g24400.1;Glyma10g05560.1;Glyma10g37520.1;Glyma13g19910.1;Glyma16g03640.1;Glyma16g29740.1;Glyma18g47230.1;Glyma19g36170.1;Glyma20g30250.1;Os02g0680700;Os06g0105800;Os06g0669700;POPTR_0002s16460;POPTR_0004s07160;POPTR_0006s13530;POPTR_0014s08520;POPTR_0016s08470;POPTR_0017s01140;Sb04g031820;Sb10g000590;AC209374…
Vc9p318.12	UGT73C6(Vc9p318.12)	TFmatrixID_0323		785	-	gtGATATtta	Myb/SANT;MYB-related	Glyma09g29800.1;Glyma16g34340.1;Os06g0728700;POPTR_0004s07270;POPTR_0012s03530;POPTR_0015s05430;Sb10g030960;GRMZM2G145041
Vc9p318.12	UGT73C6(Vc9p318.12)	TFmatrixID_0323		1273	+	ttaATATCtc	Myb/SANT;MYB-related	Glyma09g29800.1;Glyma16g34340.1;Os06g0728700;POPTR_0004s07270;POPTR_0012s03530;POPTR_0015s05430;Sb10g030960;GRMZM2G145041
Vc9p318.12	UGT73C6(Vc9p318.12)	TFmatrixID_0323		1342	+	aaaATATCca	Myb/SANT;MYB-related	Glyma09g29800.1;Glyma16g34340.1;Os06g0728700;POPTR_0004s07270;POPTR_0012s03530;POPTR_0015s05430;Sb10g030960;GRMZM2G145041
Vc9p318.12	UGT73C6(Vc9p318.12)	TFmatrixID_0326		906	+	actTATCCaa	Myb/SANT;MYB-related	AT1G70000;Glyma01g04530.1;Glyma02g03020.1;Glyma04g34720.1;Glyma05g01640.1;Glyma06g19960.1;Glyma08g40460.1;Glyma17g10250.1;Glyma18g17130.1;Os01g0187900;Os10g0561400;POPTR_0008s19610;POPTR_0010s04860;POPTR_0012s07560;POPTR_0015s08020;Sb01g029020;Sb03g003270;Sb03g006450;GRMZM2G034110;GRMZM2G400489
Vc9p318.12	UGT73C6(Vc9p318.12)	TFmatrixID_0326		1343	+	aaaTATCCaa	Myb/SANT;MYB-related	AT1G70000;Glyma01g04530.1;Glyma02g03020.1;Glyma04g34720.1;Glyma05g01640.1;Glyma06g19960.1;Glyma08g40460.1;Glyma17g10250.1;Glyma18g17130.1;Os01g0187900;Os10g0561400;POPTR_0008s19610;POPTR_0010s04860;POPTR_0012s07560;POPTR_0015s08020;Sb01g029020;Sb03g003270;Sb03g006450;GRMZM2G034110;GRMZM2G400489
Vc9p318.12	UGT73C6(Vc9p318.12)	TFmatrixID_0327		1095	+	tttGAATCtt	Myb/SANT;G2-like	POPTR_0008s11630;POPTR_0009s10980;POPTR_0010s13900;Sb08g003180;GRMZM2G016370;GRMZM2G159119
Vc9p318.12	UGT73C6(Vc9p318.12)	TFmatrixID_0328		907	-	ctTATCCa	Myb/SANT;MYB-related	AT1G70000;AT3G16350;Glyma01g04530.1;Glyma02g03020.1;Glyma04g34720.1;Glyma05g01640.1;Glyma05g04950.1;Glyma06g19960.1;Glyma08g40460.1;Glyma13g43120.1;Glyma15g02250.1;Glyma17g10250.1;Glyma18g17130.1;Os01g0187900;Os10g0561400;POPTR_0001s19070;POPTR_0003s07720;POPTR_0008s19610;POPTR_0010s04860;POPTR_0015s08020;Sb01g029020;Sb03g003270;GRMZM2G034110;GRMZM2G400489
Vc9p318.12	UGT73C6(Vc9p318.12)	TFmatrixID_0331		906	+	actTATCCaa	Myb/SANT;MYB-related	AT3G16350;Glyma01g00600.1;Glyma05g04950.1;Glyma13g43120.1;Glyma15g02250.1;Glyma17g15330.1;Glyma18g31990.1;Os01g0187900;Os10g0561400;POPTR_0001s15510;POPTR_0001s19070;POPTR_0001s22660;POPTR_0003s07720;Sb01g029020;Sb03g003270;GRMZM2G034110;GRMZM2G400489
Vc9p318.12	UGT73C6(Vc9p318.12)	TFmatrixID_0334		786	-	tGATATtta	Myb/SANT; MYB-related;MYB-related	AT1G18330;AT3G10113;Glyma09g29800.1;Os06g0728700;Sb10g030960;GRMZM2G145041
Vc9p318.12	UGT73C6(Vc9p318.12)	TFmatrixID_0334		1273	+	ttaATATCt	Myb/SANT; MYB-related;MYB-related	AT1G18330;AT3G10113;Glyma09g29800.1;Os06g0728700;Sb10g030960;GRMZM2G145041
Vc9p318.12	UGT73C6(Vc9p318.12)	TFmatrixID_0334		1342	+	aaaATATCc	Myb/SANT; MYB-related;MYB-related	AT1G18330;AT3G10113;Glyma09g29800.1;Os06g0728700;Sb10g030960;GRMZM2G145041
Vc9p318.12	UGT73C6(Vc9p318.12)	TFmatrixID_0335		907	-	ctTATCCaat	Myb/SANT;MYB-related	AT1G19000;Os10g0561400;POPTR_0008s19610;POPTR_0010s04860;Sb01g029020;GRMZM2G034110
Vc9p318.12	UGT73C6(Vc9p318.12)	TFmatrixID_0337		1095	+	tttGAATCtt	Myb/SANT;G2-like	AT1G25550;AT2G03500;AT3G25790;Glyma04g21680.1;Glyma05g08150.1;Os01g0176700;POPTR_0008s11630;POPTR_0009s10980;POPTR_0010s13900;Sb03g004090;Sb08g003180;Sb08g019720;GRMZM2G016370;GRMZM2G159119
Vc9p318.12	UGT73C6(Vc9p318.12)	TFmatrixID_0338		1095	+	tttGAATCtt	Myb/SANT;G2-like	AT1G68670;AT3G25790;Glyma04g21680.1;Glyma05g08150.1;Os01g0176700;POPTR_0007s11470;POPTR_0008s11630;POPTR_0009s10980;POPTR_0010s13900;Sb03g004090;Sb08g003180;GRMZM2G016370;GRMZM2G159119
Vc9p318.12	UGT73C6(Vc9p318.12)	TFmatrixID_0339		1343	-	aaaTATCCaaa	Myb/SANT	AT1G74840;Glyma01g04530.1;Glyma02g03020.1;Glyma05g01640.1;Glyma08g40460.1;Glyma17g10250.1;Glyma18g17130.1;POPTR_0008s19610;POPTR_0010s04860
Vc9p318.12	UGT73C6(Vc9p318.12)	TFmatrixID_0341		1095	+	tttgAATCTt	Myb/SANT; MYB; ARR-B;ARR-B	AT2G01760;Glyma02g09450.1;Glyma07g26890.1;Os03g0224200;POPTR_0008s13490;POPTR_0008s22990;POPTR_0010s11600;Sb01g042400;GRMZM2G099797;GRMZM2G126834
Vc9p318.12	UGT73C6(Vc9p318.12)	TFmatrixID_0344		1095	+	tttGAATCtt	Myb/SANT; ARR-B;ARR-B	AT3G16857;Glyma02g09450.1;Glyma07g26890.1;Glyma07g37220.1;Glyma09g04470.1;Glyma09g14650.1;Glyma15g15520.1;Glyma15g24770.1;Glyma17g03380.1;Os03g0224200;POPTR_0008s13490;POPTR_0008s22990;POPTR_0010s00320;POPTR_0010s11600;Sb01g042400;GRMZM2G099797;GRMZM2G126834
Vc9p318.12	UGT73C6(Vc9p318.12)	TFmatrixID_0348		997	+	tgggATCTTt	Myb/SANT; ARR-B;ARR-B	AT4G16110;Glyma02g09450.1;Glyma07g26890.1;Glyma07g37220.1;Glyma09g04470.1;Glyma09g14650.1;Glyma15g15520.1;Glyma15g24770.1;Glyma17g03380.1;Os03g0224200;POPTR_0008s13490;POPTR_0008s22990;POPTR_0010s00320;POPTR_0010s11600;Sb01g042400;GRMZM2G099797;GRMZM2G126834
Vc9p318.12	UGT73C6(Vc9p318.12)	TFmatrixID_0348		1096	+	ttgaATCTTa	Myb/SANT; ARR-B;ARR-B	AT4G16110;Glyma02g09450.1;Glyma07g26890.1;Glyma07g37220.1;Glyma09g04470.1;Glyma09g14650.1;Glyma15g15520.1;Glyma15g24770.1;Glyma17g03380.1;Os03g0224200;POPTR_0008s13490;POPTR_0008s22990;POPTR_0010s00320;POPTR_0010s11600;Sb01g042400;GRMZM2G099797;GRMZM2G126834
Vc9p318.12	UGT73C6(Vc9p318.12)	TFmatrixID_0353		905	+	aacTTATCca	Myb/SANT	AT5G04760
Vc9p318.12	UGT73C6(Vc9p318.12)	TFmatrixID_0353		1149	+	atcTTATCta	Myb/SANT	AT5G04760
Vc9p318.12	UGT73C6(Vc9p318.12)	TFmatrixID_0353		1609	-	aaGATAAagg	Myb/SANT	AT5G04760
Vc9p318.12	UGT73C6(Vc9p318.12)	TFmatrixID_0353		1721	+	atcTTATCag	Myb/SANT	AT5G04760
Vc9p318.12	UGT73C6(Vc9p318.12)	TFmatrixID_0356		906	+	acTTATCca	Myb/SANT	AT5G08520
Vc9p318.12	UGT73C6(Vc9p318.12)	TFmatrixID_0357		120	+	aaAATATacc	Myb/SANT; G2-like; MYB;G2-like	AT1G32240;AT4G17695;AT5G16560;AT5G42630;Glyma02g40930.1;Glyma04g03800.1;Glyma06g03900.1;Glyma07g12070.1;Glyma09g30140.1;Glyma09g34030.1;Glyma11g33350.1;Glyma14g08620.1;Glyma14g39260.1;Glyma17g36500.1;Glyma18g04880.1;Os02g0696900;Os03g0766500;Os08g0160300;Os08g0426866;Os09g0395300;POPTR_0001s02010;POPTR_0002s13170;POPTR_0003s09490;POPTR_0004s08070;POPTR_0012s03900;POPTR_0014s03650;POPTR_0015s05340…
Vc9p318.12	UGT73C6(Vc9p318.12)	TFmatrixID_0357		516	+	aaAATATtat	Myb/SANT; G2-like; MYB;G2-like	AT1G32240;AT4G17695;AT5G16560;AT5G42630;Glyma02g40930.1;Glyma04g03800.1;Glyma06g03900.1;Glyma07g12070.1;Glyma09g30140.1;Glyma09g34030.1;Glyma11g33350.1;Glyma14g08620.1;Glyma14g39260.1;Glyma17g36500.1;Glyma18g04880.1;Os02g0696900;Os03g0766500;Os08g0160300;Os08g0426866;Os09g0395300;POPTR_0001s02010;POPTR_0002s13170;POPTR_0003s09490;POPTR_0004s08070;POPTR_0012s03900;POPTR_0014s03650;POPTR_0015s05340…
Vc9p318.12	UGT73C6(Vc9p318.12)	TFmatrixID_0357		516	-	aaaATATTat	Myb/SANT; G2-like; MYB;G2-like	AT1G32240;AT4G17695;AT5G16560;AT5G42630;Glyma02g40930.1;Glyma04g03800.1;Glyma06g03900.1;Glyma07g12070.1;Glyma09g30140.1;Glyma09g34030.1;Glyma11g33350.1;Glyma14g08620.1;Glyma14g39260.1;Glyma17g36500.1;Glyma18g04880.1;Os02g0696900;Os03g0766500;Os08g0160300;Os08g0426866;Os09g0395300;POPTR_0001s02010;POPTR_0002s13170;POPTR_0003s09490;POPTR_0004s08070;POPTR_0012s03900;POPTR_0014s03650;POPTR_0015s05340…
Vc9p318.12	UGT73C6(Vc9p318.12)	TFmatrixID_0357		698	+	cgAATATtat	Myb/SANT; G2-like; MYB;G2-like	AT1G32240;AT4G17695;AT5G16560;AT5G42630;Glyma02g40930.1;Glyma04g03800.1;Glyma06g03900.1;Glyma07g12070.1;Glyma09g30140.1;Glyma09g34030.1;Glyma11g33350.1;Glyma14g08620.1;Glyma14g39260.1;Glyma17g36500.1;Glyma18g04880.1;Os02g0696900;Os03g0766500;Os08g0160300;Os08g0426866;Os09g0395300;POPTR_0001s02010;POPTR_0002s13170;POPTR_0003s09490;POPTR_0004s08070;POPTR_0012s03900;POPTR_0014s03650;POPTR_0015s05340…
Vc9p318.12	UGT73C6(Vc9p318.12)	TFmatrixID_0357		698	-	cgaATATTat	Myb/SANT; G2-like; MYB;G2-like	AT1G32240;AT4G17695;AT5G16560;AT5G42630;Glyma02g40930.1;Glyma04g03800.1;Glyma06g03900.1;Glyma07g12070.1;Glyma09g30140.1;Glyma09g34030.1;Glyma11g33350.1;Glyma14g08620.1;Glyma14g39260.1;Glyma17g36500.1;Glyma18g04880.1;Os02g0696900;Os03g0766500;Os08g0160300;Os08g0426866;Os09g0395300;POPTR_0001s02010;POPTR_0002s13170;POPTR_0003s09490;POPTR_0004s08070;POPTR_0012s03900;POPTR_0014s03650;POPTR_0015s05340…
Vc9p318.12	UGT73C6(Vc9p318.12)	TFmatrixID_0357		853	+	acAATATtca	Myb/SANT; G2-like; MYB;G2-like	AT1G32240;AT4G17695;AT5G16560;AT5G42630;Glyma02g40930.1;Glyma04g03800.1;Glyma06g03900.1;Glyma07g12070.1;Glyma09g30140.1;Glyma09g34030.1;Glyma11g33350.1;Glyma14g08620.1;Glyma14g39260.1;Glyma17g36500.1;Glyma18g04880.1;Os02g0696900;Os03g0766500;Os08g0160300;Os08g0426866;Os09g0395300;POPTR_0001s02010;POPTR_0002s13170;POPTR_0003s09490;POPTR_0004s08070;POPTR_0012s03900;POPTR_0014s03650;POPTR_0015s05340…
Vc9p318.12	UGT73C6(Vc9p318.12)	TFmatrixID_0357		853	-	acaATATTca	Myb/SANT; G2-like; MYB;G2-like	AT1G32240;AT4G17695;AT5G16560;AT5G42630;Glyma02g40930.1;Glyma04g03800.1;Glyma06g03900.1;Glyma07g12070.1;Glyma09g30140.1;Glyma09g34030.1;Glyma11g33350.1;Glyma14g08620.1;Glyma14g39260.1;Glyma17g36500.1;Glyma18g04880.1;Os02g0696900;Os03g0766500;Os08g0160300;Os08g0426866;Os09g0395300;POPTR_0001s02010;POPTR_0002s13170;POPTR_0003s09490;POPTR_0004s08070;POPTR_0012s03900;POPTR_0014s03650;POPTR_0015s05340…
Vc9p318.12	UGT73C6(Vc9p318.12)	TFmatrixID_0357		1235	+	aaAATATttc	Myb/SANT; G2-like; MYB;G2-like	AT1G32240;AT4G17695;AT5G16560;AT5G42630;Glyma02g40930.1;Glyma04g03800.1;Glyma06g03900.1;Glyma07g12070.1;Glyma09g30140.1;Glyma09g34030.1;Glyma11g33350.1;Glyma14g08620.1;Glyma14g39260.1;Glyma17g36500.1;Glyma18g04880.1;Os02g0696900;Os03g0766500;Os08g0160300;Os08g0426866;Os09g0395300;POPTR_0001s02010;POPTR_0002s13170;POPTR_0003s09490;POPTR_0004s08070;POPTR_0012s03900;POPTR_0014s03650;POPTR_0015s05340…
Vc9p318.12	UGT73C6(Vc9p318.12)	TFmatrixID_0357		1235	-	aaaATATTtc	Myb/SANT; G2-like; MYB;G2-like	AT1G32240;AT4G17695;AT5G16560;AT5G42630;Glyma02g40930.1;Glyma04g03800.1;Glyma06g03900.1;Glyma07g12070.1;Glyma09g30140.1;Glyma09g34030.1;Glyma11g33350.1;Glyma14g08620.1;Glyma14g39260.1;Glyma17g36500.1;Glyma18g04880.1;Os02g0696900;Os03g0766500;Os08g0160300;Os08g0426866;Os09g0395300;POPTR_0001s02010;POPTR_0002s13170;POPTR_0003s09490;POPTR_0004s08070;POPTR_0012s03900;POPTR_0014s03650;POPTR_0015s05340…
Vc9p318.12	UGT73C6(Vc9p318.12)	TFmatrixID_0361		906	+	acTTATCcaa	Myb/SANT;MYB-related	AT1G70000;AT3G16350;AT5G47390;Glyma01g00600.1;Glyma01g04530.1;Glyma02g03020.1;Glyma05g04950.1;Glyma05g36290.1;Glyma08g03330.1;Glyma08g40460.1;Glyma17g15330.1;Glyma18g31990.1;Os01g0187900;Os01g0192300;Os05g0195700;Os10g0561400;POPTR_0001s15510;POPTR_0003s07720;POPTR_0006s15480;POPTR_0008s19610;POPTR_0010s04860;Sb01g029020;Sb03g003270;Sb09g006060;GRMZM2G034110;GRMZM2G400489
Vc9p318.12	UGT73C6(Vc9p318.12)	TFmatrixID_0361		1150	+	tcTTATCtag	Myb/SANT;MYB-related	AT1G70000;AT3G16350;AT5G47390;Glyma01g00600.1;Glyma01g04530.1;Glyma02g03020.1;Glyma05g04950.1;Glyma05g36290.1;Glyma08g03330.1;Glyma08g40460.1;Glyma17g15330.1;Glyma18g31990.1;Os01g0187900;Os01g0192300;Os05g0195700;Os10g0561400;POPTR_0001s15510;POPTR_0003s07720;POPTR_0006s15480;POPTR_0008s19610;POPTR_0010s04860;Sb01g029020;Sb03g003270;Sb09g006060;GRMZM2G034110;GRMZM2G400489
Vc9p318.12	UGT73C6(Vc9p318.12)	TFmatrixID_0362		1149	+	atctTATCTagtt	Myb/SANT; ARR-B	AT5G58080;Glyma09g14650.1;Glyma15g24770.1;POPTR_0018s11960
Vc9p318.12	UGT73C6(Vc9p318.12)	TFmatrixID_0362		1252	+	tgctTATCTtctc	Myb/SANT; ARR-B	AT5G58080;Glyma09g14650.1;Glyma15g24770.1;POPTR_0018s11960
Vc9p318.12	UGT73C6(Vc9p318.12)	TFmatrixID_0364		786	-	tGATATtt	Myb/SANT; MYB-related	AT3G09600;AT4G01280;Glyma10g05560.1;Glyma13g19910.1;Glyma18g47230.1;POPTR_0006s13530;POPTR_0016s08470
Vc9p318.12	UGT73C6(Vc9p318.12)	TFmatrixID_0364		1274	+	taATATCt	Myb/SANT; MYB-related	AT3G09600;AT4G01280;Glyma10g05560.1;Glyma13g19910.1;Glyma18g47230.1;POPTR_0006s13530;POPTR_0016s08470
Vc9p318.12	UGT73C6(Vc9p318.12)	TFmatrixID_0364		1343	+	aaATATCc	Myb/SANT; MYB-related	AT3G09600;AT4G01280;Glyma10g05560.1;Glyma13g19910.1;Glyma18g47230.1;POPTR_0006s13530;POPTR_0016s08470
Vc9p318.12	UGT73C6(Vc9p318.12)	TFmatrixID_0369		785	-	gtGATATtt	Myb/SANT; MYB-related	AT1G01060;AT5G37260;Glyma02g40800.1;Glyma03g42260.1;Glyma07g05410.1;Glyma11g33180.1;Glyma14g39130.1;Glyma18g05050.1;Glyma19g45030.1;Os08g0157600;POPTR_0002s18170;POPTR_0004s07270;POPTR_0014s10240;Sb07g003870
Vc9p318.12	UGT73C6(Vc9p318.12)	TFmatrixID_0369		1274	+	taATATCtc	Myb/SANT; MYB-related	AT1G01060;AT5G37260;Glyma02g40800.1;Glyma03g42260.1;Glyma07g05410.1;Glyma11g33180.1;Glyma14g39130.1;Glyma18g05050.1;Glyma19g45030.1;Os08g0157600;POPTR_0002s18170;POPTR_0004s07270;POPTR_0014s10240;Sb07g003870
Vc9p318.12	UGT73C6(Vc9p318.12)	TFmatrixID_0369		1343	+	aaATATCca	Myb/SANT; MYB-related	AT1G01060;AT5G37260;Glyma02g40800.1;Glyma03g42260.1;Glyma07g05410.1;Glyma11g33180.1;Glyma14g39130.1;Glyma18g05050.1;Glyma19g45030.1;Os08g0157600;POPTR_0002s18170;POPTR_0004s07270;POPTR_0014s10240;Sb07g003870
Vc9p318.12	UGT73C6(Vc9p318.12)	TFmatrixID_0371		1095	+	tttGAATCtt	Myb/SANT;ARR-B	Glyma02g09450.1;Glyma07g26890.1;Glyma07g37220.1;Glyma09g04470.1;Glyma15g15520.1;Glyma17g03380.1;Os02g0796500;Os03g0224200;Os06g0183100;POPTR_0008s13490;POPTR_0008s22990;POPTR_0010s00320;POPTR_0010s11600;Sb01g042400;Sb04g035980;Sb10g005580;GRMZM2G099797;GRMZM2G126834;GRMZM2G479110
Vc9p318.12	UGT73C6(Vc9p318.12)	TFmatrixID_0372		906	+	actTATCCa	Myb/SANT;MYB-related	AT1G70000;AT3G16350;Glyma01g00600.1;Glyma01g04530.1;Glyma02g03020.1;Glyma05g01640.1;Glyma05g04950.1;Glyma05g36290.1;Glyma08g03330.1;Glyma08g40460.1;Glyma13g43120.1;Glyma15g02250.1;Glyma17g10250.1;Glyma17g15330.1;Glyma18g17130.1;Os01g0187900;Os01g0192300;Os05g0195700;Os08g0151000;Os10g0561400;POPTR_0001s15510;POPTR_0001s19070;POPTR_0003s07720;POPTR_0006s15480;POPTR_0008s19610;POPTR_0010s04860;POPT…
Vc9p318.12	UGT73C6(Vc9p318.12)	TFmatrixID_0374		905	-	aactTATCCaatg	Myb/SANT;MYB-related	Glyma05g36290.1;Glyma08g03330.1;Os01g0192300;Os05g0195700;POPTR_0006s15480;POPTR_0008s19610;POPTR_0010s04860;Sb03g003100;Sb09g006060;GRMZM2G049695;GRMZM2G078636
Vc9p318.12	UGT73C6(Vc9p318.12)	TFmatrixID_0381		1755	-	tACGTAaa	NAC; NAM	AT1G01720;AT1G52880;AT1G52890;AT1G61110;AT1G77450;AT3G04070;AT3G15500;AT3G15510;AT4G27410;AT5G08790;AT5G63790;Glyma01g06150.1;Glyma02g07700.1;Glyma02g12220.1;Glyma02g26480.1;Glyma04g38560.1;Glyma04g42800.1;Glyma05g32850.1;Glyma06g11970.1;Glyma06g16440.1;Glyma06g38410.1;Glyma06g38440.1;Glyma07g31220.1;Glyma07g35630.1;Glyma10g09180.1;Glyma12g22790.1;Glyma12g22880.1;Glyma12g29360.1;Glyma12g34990.1;G…
Vc9p318.12	UGT73C6(Vc9p318.12)	TFmatrixID_0382		71	-	agTTGACtt	NAC; NAM	AT1G01720;AT1G52880;AT1G52890;AT1G69490;AT3G04070;AT3G15500;AT3G15510;AT4G27410;Glyma01g06150.1;Glyma02g07700.1;Glyma02g12220.1;Glyma04g38560.1;Glyma05g32850.1;Glyma06g11970.1;Glyma06g16440.1;Glyma06g38410.1;Glyma06g38440.1;Glyma07g31220.1;Glyma07g35630.1;Glyma12g22790.1;Glyma12g22880.1;Glyma12g29360.1;Glyma12g34990.1;Glyma12g35000.1;Glyma13g31660.1;Glyma13g35550.1;Glyma13g35560.1;Glyma13g40250.1…
Vc9p318.12	UGT73C6(Vc9p318.12)	TFmatrixID_0382		1985	+	aaGTCAAgc	NAC; NAM	AT1G01720;AT1G52880;AT1G52890;AT1G69490;AT3G04070;AT3G15500;AT3G15510;AT4G27410;Glyma01g06150.1;Glyma02g07700.1;Glyma02g12220.1;Glyma04g38560.1;Glyma05g32850.1;Glyma06g11970.1;Glyma06g16440.1;Glyma06g38410.1;Glyma06g38440.1;Glyma07g31220.1;Glyma07g35630.1;Glyma12g22790.1;Glyma12g22880.1;Glyma12g29360.1;Glyma12g34990.1;Glyma12g35000.1;Glyma13g31660.1;Glyma13g35550.1;Glyma13g35560.1;Glyma13g40250.1…
Vc9p318.12	UGT73C6(Vc9p318.12)	TFmatrixID_0383		1753	-	ggTACGTaaa	NAC; NAM	AT1G12260;AT1G32770;AT1G33280;AT1G62700;AT1G71930;AT1G79580;AT2G18060;AT2G46770;AT3G61910;AT4G10350;AT4G36160;AT5G62380;AT5G66300;Glyma01g37310.1;Glyma02g05620.1;Glyma04g13660.1;Glyma05g04250.1;Glyma06g47680.1;Glyma07g05660.1;Glyma08g17140.1;Glyma09g36600.1;Glyma09g36820.1;Glyma10g36050.1;Glyma11g03340.1;Glyma11g07990.1;Glyma12g00540.1;Glyma12g00760.1;Glyma15g42050.1;Glyma16g02200.1;Glyma16g24200…
Vc9p318.12	UGT73C6(Vc9p318.12)	TFmatrixID_0387		1814	-	tgaCGCAAca	NAC; NAM	AT2G33480;AT5G13180;Glyma01g06150.1;Glyma02g12220.1;Glyma05g38380.1;Glyma06g17480.1;Glyma08g01280.1;Glyma08g47520.1;POPTR_0001s13380;POPTR_0003s16490;POPTR_0012s10530;POPTR_0015s11420
Vc9p318.12	UGT73C6(Vc9p318.12)	TFmatrixID_0392		1812	-	catgACGCAa	NAC; NAM	AT1G12260;AT1G32770;AT1G33280;AT1G62700;AT1G71930;AT1G79580;AT2G18060;AT3G61910;AT4G10350;AT4G36160;AT5G62380;AT5G66300;Glyma01g37310.1;Glyma02g05620.1;Glyma04g13660.1;Glyma05g04250.1;Glyma06g47680.1;Glyma07g05660.1;Glyma08g17140.1;Glyma09g36600.1;Glyma09g36820.1;Glyma10g36050.1;Glyma11g03340.1;Glyma11g07990.1;Glyma12g00540.1;Glyma12g00760.1;Glyma15g42050.1;Glyma16g02200.1;Glyma16g24200.1;Glyma17…
Vc9p318.12	UGT73C6(Vc9p318.12)	TFmatrixID_0392		1940	-	gtgaACGCAa	NAC; NAM	AT1G12260;AT1G32770;AT1G33280;AT1G62700;AT1G71930;AT1G79580;AT2G18060;AT3G61910;AT4G10350;AT4G36160;AT5G62380;AT5G66300;Glyma01g37310.1;Glyma02g05620.1;Glyma04g13660.1;Glyma05g04250.1;Glyma06g47680.1;Glyma07g05660.1;Glyma08g17140.1;Glyma09g36600.1;Glyma09g36820.1;Glyma10g36050.1;Glyma11g03340.1;Glyma11g07990.1;Glyma12g00540.1;Glyma12g00760.1;Glyma15g42050.1;Glyma16g02200.1;Glyma16g24200.1;Glyma17…
Vc9p318.12	UGT73C6(Vc9p318.12)	TFmatrixID_0394		1942	-	gaaCGCAAaac	NAC; NAM	AT1G76420;AT2G24430;AT3G04060;AT3G15170;AT3G18400;AT3G29035;AT5G18270;AT5G53950;Glyma02g07760.1;Glyma04g01650.1;Glyma04g33270.1;Glyma05g00930.1;Glyma05g35090.1;Glyma06g08440.1;Glyma06g21020.1;Glyma06g35660.1;Glyma07g10240.1;Glyma08g04610.1;Glyma09g31650.1;Glyma09g37050.1;Glyma12g26190.1;Glyma12g35530.1;Glyma13g05540.1;Glyma13g34950.1;Glyma14g20340.1;Glyma16g04720.1;Glyma16g26810.1;Glyma17g10970.1…
Vc9p318.12	UGT73C6(Vc9p318.12)	TFmatrixID_0398		1752	+	cgGTACGta	SBP	AT1G69170;AT2G42200;AT2G47070;AT3G57920;AT5G43270;Glyma01g08060.1;Glyma01g15020.1;Glyma02g01160.1;Glyma02g13370.1;Glyma02g30670.1;Glyma03g27180.1;Glyma04g37390.1;Glyma05g00200.1;Glyma05g38180.1;Glyma06g36140.1;Glyma07g14610.1;Glyma07g19770.1;Glyma07g31880.1;Glyma07g36180.1;Glyma08g01450.1;Glyma09g09790.1;Glyma10g01210.1;Glyma11g16700.1;Glyma11g36980.1;Glyma12g27330.1;Glyma12g35460.1;Glyma13g24590…
Vc9p318.12	UGT73C6(Vc9p318.12)	TFmatrixID_0401		1750	+	atcgGTACGtaa	SBP	AT1G27360;AT1G27370;AT1G69170;AT2G42200;AT3G57920;AT5G43270;Glyma01g08060.1;Glyma01g15020.1;Glyma02g13370.1;Glyma02g30670.1;Glyma03g27180.1;Glyma04g37390.1;Glyma05g00200.1;Glyma05g38180.1;Glyma06g17700.1;Glyma06g22450.1;Glyma07g14610.1;Glyma07g19770.1;Glyma07g31880.1;Glyma08g01450.1;Glyma11g16700.1;Glyma11g36980.1;Glyma12g27330.1;Glyma13g24590.1;Glyma13g35000.1;Glyma16g05890.1;Glyma17g08840.1;Gly…
Vc9p318.12	UGT73C6(Vc9p318.12)	TFmatrixID_0402		1753	+	gGTACGtaa	SBP	AT1G53160;AT1G69170;AT2G47070;AT3G57920;Glyma01g15020.1;Glyma02g01160.1;Glyma03g27180.1;Glyma05g00200.1;Glyma05g38180.1;Glyma06g36140.1;Glyma07g14610.1;Glyma07g19770.1;Glyma07g31880.1;Glyma07g36180.1;Glyma08g01450.1;Glyma09g09790.1;Glyma10g01210.1;Glyma11g16700.1;Glyma12g27330.1;Glyma12g35460.1;Glyma13g24590.1;Glyma13g31090.1;Glyma13g35000.1;Glyma15g08270.1;Glyma15g21860.1;Glyma17g04400.1;Glyma17…
Vc9p318.12	UGT73C6(Vc9p318.12)	TFmatrixID_0403		97	+	cgCGTACaga	SBP	AT1G27370;AT1G69170;AT1G76580;AT2G42200;AT2G47070;AT3G57920;AT5G43270;AT5G50570;AT5G50670;Glyma01g08060.1;Glyma01g15020.1;Glyma02g01160.1;Glyma02g13370.1;Glyma02g30670.1;Glyma03g27180.1;Glyma04g37390.1;Glyma05g00200.1;Glyma05g38180.1;Glyma06g17700.1;Glyma06g22450.1;Glyma06g36140.1;Glyma07g14610.1;Glyma07g19770.1;Glyma07g31880.1;Glyma07g36180.1;Glyma08g01450.1;Glyma09g09790.1;Glyma10g01210.1;Glyma…
Vc9p318.12	UGT73C6(Vc9p318.12)	TFmatrixID_0404		1752	+	cgGTACGta	SBP	AT1G69170;AT2G42200;AT2G47070;AT3G15270;Glyma01g15020.1;Glyma02g01160.1;Glyma02g30670.1;Glyma06g36140.1;Glyma07g19770.1;Glyma07g31880.1;Glyma07g36180.1;Glyma09g09790.1;Glyma10g01210.1;Glyma11g16700.1;Glyma12g27330.1;Glyma12g35460.1;Glyma13g24590.1;Glyma13g31090.1;Glyma13g35000.1;Glyma13g37130.1;Glyma15g08270.1;Glyma15g21860.1;Glyma17g04400.1;Glyma18g36960.1;Glyma19g32800.1;Glyma20g00900.1;Os03g08…
Vc9p318.12	UGT73C6(Vc9p318.12)	TFmatrixID_0406		1753	+	gGTACGtaa	SBP	AT5G18830;Glyma13g28460.1;Os05g0408200;POPTR_0008s20160;POPTR_0010s02710;Sb09g020110;GRMZM2G109354
Vc9p318.12	UGT73C6(Vc9p318.12)	TFmatrixID_0410		1752	+	cgGTACGta	SBP	AT1G27370;AT1G69170;AT2G42200;AT2G47070;AT3G57920;AT5G43270;AT5G50570;AT5G50670;Glyma01g08060.1;Glyma01g15020.1;Glyma02g01160.1;Glyma02g13370.1;Glyma02g30670.1;Glyma03g27180.1;Glyma04g37390.1;Glyma05g00200.1;Glyma05g38180.1;Glyma06g17700.1;Glyma06g22450.1;Glyma06g36140.1;Glyma07g14610.1;Glyma07g19770.1;Glyma07g31880.1;Glyma07g36180.1;Glyma08g01450.1;Glyma09g09790.1;Glyma10g01210.1;Glyma11g16700.1…
Vc9p318.12	UGT73C6(Vc9p318.12)	TFmatrixID_0411		1750	+	atcgGTACGt	SBP	AT1G27370;AT1G69170;AT2G42200;AT2G47070;AT3G57920;AT5G43270;AT5G50570;AT5G50670;Glyma01g08060.1;Glyma01g15020.1;Glyma02g01160.1;Glyma02g13370.1;Glyma02g30670.1;Glyma03g27180.1;Glyma04g37390.1;Glyma05g00200.1;Glyma05g38180.1;Glyma06g17700.1;Glyma06g22450.1;Glyma06g36140.1;Glyma07g14610.1;Glyma07g19770.1;Glyma07g31880.1;Glyma07g36180.1;Glyma08g01450.1;Glyma09g09790.1;Glyma10g01210.1;Glyma11g16700.1…
Vc9p318.12	UGT73C6(Vc9p318.12)	TFmatrixID_0413		1308	-	ATGATta	Sox; YABBY	AT2G26580;AT4G00180;Glyma13g22620.1;Glyma17g12200.1;POPTR_0006s06700;POPTR_0018s12990
Vc9p318.12	UGT73C6(Vc9p318.12)	TFmatrixID_0417		648	-	ctGGTCGct	Storekeeper;GeBP	Os03g0370250;Os07g0636100;Sb01g034370;Sb02g040550;GRMZM2G026417;GRMZM2G030458;GRMZM2G075122;GRMZM2G082318
Vc9p318.12	UGT73C6(Vc9p318.12)	TFmatrixID_0420		263	+	ggGGGCCctc	TCP	AT1G35560;AT1G58100;AT1G72010;AT2G45680;Glyma02g11780.1;Glyma03g02090.1;Glyma05g01130.1;Glyma05g03610.1;Glyma06g20660.1;Glyma07g08710.1;Glyma07g25430.1;Glyma08g41070.1;Glyma10g38510.1;Glyma11g20200.1;Glyma12g28970.1;Glyma13g20710.1;Glyma16g00580.1;Glyma17g14160.1;Glyma18g15410.1;Glyma20g29330.1;Os01g0924400;Os02g0747400;Os04g0194600;Os06g0226700;Os09g0521300;Os12g0173300;POPTR_0001s08590;POPTR_00…
Vc9p318.12	UGT73C6(Vc9p318.12)	TFmatrixID_0420		263	-	gggGGCCCtc	TCP	AT1G35560;AT1G58100;AT1G72010;AT2G45680;Glyma02g11780.1;Glyma03g02090.1;Glyma05g01130.1;Glyma05g03610.1;Glyma06g20660.1;Glyma07g08710.1;Glyma07g25430.1;Glyma08g41070.1;Glyma10g38510.1;Glyma11g20200.1;Glyma12g28970.1;Glyma13g20710.1;Glyma16g00580.1;Glyma17g14160.1;Glyma18g15410.1;Glyma20g29330.1;Os01g0924400;Os02g0747400;Os04g0194600;Os06g0226700;Os09g0521300;Os12g0173300;POPTR_0001s08590;POPTR_00…
Vc9p318.12	UGT73C6(Vc9p318.12)	TFmatrixID_0422		111	+	tgGGACCaga	TCP	AT1G53230;Glyma12g20160.1;Glyma12g33640.1;Glyma12g35720.1;Glyma13g34690.1;POPTR_0013s12370;POPTR_0019s12110;Sb03g001940;Sb03g034918;AC205574.3_FG006;GRMZM2G015037
Vc9p318.12	UGT73C6(Vc9p318.12)	TFmatrixID_0422		357	-	tctGGTCCca	TCP	AT1G53230;Glyma12g20160.1;Glyma12g33640.1;Glyma12g35720.1;Glyma13g34690.1;POPTR_0013s12370;POPTR_0019s12110;Sb03g001940;Sb03g034918;AC205574.3_FG006;GRMZM2G015037
Vc9p318.12	UGT73C6(Vc9p318.12)	TFmatrixID_0422		556	-	agtGGTCCtg	TCP	AT1G53230;Glyma12g20160.1;Glyma12g33640.1;Glyma12g35720.1;Glyma13g34690.1;POPTR_0013s12370;POPTR_0019s12110;Sb03g001940;Sb03g034918;AC205574.3_FG006;GRMZM2G015037
Vc9p318.12	UGT73C6(Vc9p318.12)	TFmatrixID_0423		557	-	gtGGTCCt	TCP	AT2G31070;AT3G15030;Glyma06g34330.1;Glyma06g43720.1;Glyma12g14200.1;Glyma12g20160.1;Glyma12g33640.1;Glyma12g35720.1;Glyma13g34690.1;Glyma13g36840.1;POPTR_0001s38480;POPTR_0011s09890;POPTR_0013s12370;POPTR_0019s12110;Sb03g001940;Sb03g034918;AC205574.3_FG006;GRMZM2G015037
Vc9p318.12	UGT73C6(Vc9p318.12)	TFmatrixID_0424		142	+	ggaCCCACtt	TCP	AT1G35560;AT1G58100;AT2G45680;AT3G27010;AT5G08330;AT5G23280;AT5G41030;Glyma02g11780.1;Glyma03g02090.1;Glyma05g01130.1;Glyma05g03610.1;Glyma06g20660.1;Glyma07g08710.1;Glyma07g25430.1;Glyma08g41070.1;Glyma09g42140.1;Glyma10g06510.1;Glyma10g38510.1;Glyma10g43190.1;Glyma11g20200.1;Glyma12g28970.1;Glyma13g20710.1;Glyma16g00580.1;Glyma17g14160.1;Glyma18g15410.1;Glyma20g23700.1;Glyma20g29330.1;Os01g0924…
Vc9p318.12	UGT73C6(Vc9p318.12)	TFmatrixID_0424		155	+	ggtCCCACac	TCP	AT1G35560;AT1G58100;AT2G45680;AT3G27010;AT5G08330;AT5G23280;AT5G41030;Glyma02g11780.1;Glyma03g02090.1;Glyma05g01130.1;Glyma05g03610.1;Glyma06g20660.1;Glyma07g08710.1;Glyma07g25430.1;Glyma08g41070.1;Glyma09g42140.1;Glyma10g06510.1;Glyma10g38510.1;Glyma10g43190.1;Glyma11g20200.1;Glyma12g28970.1;Glyma13g20710.1;Glyma16g00580.1;Glyma17g14160.1;Glyma18g15410.1;Glyma20g23700.1;Glyma20g29330.1;Os01g0924…
Vc9p318.12	UGT73C6(Vc9p318.12)	TFmatrixID_0424		326	-	aaGTGGGtcc	TCP	AT1G35560;AT1G58100;AT2G45680;AT3G27010;AT5G08330;AT5G23280;AT5G41030;Glyma02g11780.1;Glyma03g02090.1;Glyma05g01130.1;Glyma05g03610.1;Glyma06g20660.1;Glyma07g08710.1;Glyma07g25430.1;Glyma08g41070.1;Glyma09g42140.1;Glyma10g06510.1;Glyma10g38510.1;Glyma10g43190.1;Glyma11g20200.1;Glyma12g28970.1;Glyma13g20710.1;Glyma16g00580.1;Glyma17g14160.1;Glyma18g15410.1;Glyma20g23700.1;Glyma20g29330.1;Os01g0924…
Vc9p318.12	UGT73C6(Vc9p318.12)	TFmatrixID_0426		140	+	ggggaCCCAC	TCP	AT1G35560;AT1G58100;AT2G45680;AT5G08330;AT5G23280;AT5G51910;Glyma02g11780.1;Glyma03g02090.1;Glyma05g01130.1;Glyma05g03610.1;Glyma06g20660.1;Glyma07g08710.1;Glyma07g25430.1;Glyma08g41070.1;Glyma09g42140.1;Glyma10g38510.1;Glyma10g43190.1;Glyma11g20200.1;Glyma12g28970.1;Glyma13g20710.1;Glyma16g00580.1;Glyma17g14160.1;Glyma18g15410.1;Glyma20g23700.1;Glyma20g29330.1;Os01g0924400;Os02g0747400;Os04g0194…
Vc9p318.12	UGT73C6(Vc9p318.12)	TFmatrixID_0426		153	+	tgggtCCCAC	TCP	AT1G35560;AT1G58100;AT2G45680;AT5G08330;AT5G23280;AT5G51910;Glyma02g11780.1;Glyma03g02090.1;Glyma05g01130.1;Glyma05g03610.1;Glyma06g20660.1;Glyma07g08710.1;Glyma07g25430.1;Glyma08g41070.1;Glyma09g42140.1;Glyma10g38510.1;Glyma10g43190.1;Glyma11g20200.1;Glyma12g28970.1;Glyma13g20710.1;Glyma16g00580.1;Glyma17g14160.1;Glyma18g15410.1;Glyma20g23700.1;Glyma20g29330.1;Os01g0924400;Os02g0747400;Os04g0194…
Vc9p318.12	UGT73C6(Vc9p318.12)	TFmatrixID_0426		328	-	GTGGGtcccc	TCP	AT1G35560;AT1G58100;AT2G45680;AT5G08330;AT5G23280;AT5G51910;Glyma02g11780.1;Glyma03g02090.1;Glyma05g01130.1;Glyma05g03610.1;Glyma06g20660.1;Glyma07g08710.1;Glyma07g25430.1;Glyma08g41070.1;Glyma09g42140.1;Glyma10g38510.1;Glyma10g43190.1;Glyma11g20200.1;Glyma12g28970.1;Glyma13g20710.1;Glyma16g00580.1;Glyma17g14160.1;Glyma18g15410.1;Glyma20g23700.1;Glyma20g29330.1;Os01g0924400;Os02g0747400;Os04g0194…
Vc9p318.12	UGT73C6(Vc9p318.12)	TFmatrixID_0427		112	+	gGGACCag	TCP	AT3G02150;AT5G08070;AT5G60970;Glyma04g32340.1;Glyma05g00300.1;Glyma06g22240.1;Glyma08g27150.1;Glyma17g08760.1;Glyma18g50370.1;Glyma19g03810.1;POPTR_0004s11510;POPTR_0015s06980;POPTR_0017s13050;GRMZM2G120151;GRMZM2G166946
Vc9p318.12	UGT73C6(Vc9p318.12)	TFmatrixID_0427		358	-	ctGGTCCc	TCP	AT3G02150;AT5G08070;AT5G60970;Glyma04g32340.1;Glyma05g00300.1;Glyma06g22240.1;Glyma08g27150.1;Glyma17g08760.1;Glyma18g50370.1;Glyma19g03810.1;POPTR_0004s11510;POPTR_0015s06980;POPTR_0017s13050;GRMZM2G120151;GRMZM2G166946
Vc9p318.12	UGT73C6(Vc9p318.12)	TFmatrixID_0427		557	-	gtGGTCCt	TCP	AT3G02150;AT5G08070;AT5G60970;Glyma04g32340.1;Glyma05g00300.1;Glyma06g22240.1;Glyma08g27150.1;Glyma17g08760.1;Glyma18g50370.1;Glyma19g03810.1;POPTR_0004s11510;POPTR_0015s06980;POPTR_0017s13050;GRMZM2G120151;GRMZM2G166946
Vc9p318.12	UGT73C6(Vc9p318.12)	TFmatrixID_0429		142	+	ggaCCCAC	TCP	AT1G35560;AT1G58100;AT2G45680;AT5G08330;AT5G23280;AT5G41030;Glyma02g11780.1;Glyma03g02090.1;Glyma05g01130.1;Glyma05g03610.1;Glyma06g20660.1;Glyma07g08710.1;Glyma07g25430.1;Glyma08g41070.1;Glyma09g42140.1;Glyma10g06510.1;Glyma10g38510.1;Glyma10g43190.1;Glyma11g20200.1;Glyma12g28970.1;Glyma13g20710.1;Glyma16g00580.1;Glyma17g14160.1;Glyma18g15410.1;Glyma20g23700.1;Glyma20g29330.1;Os01g0924400;Os02g0…
Vc9p318.12	UGT73C6(Vc9p318.12)	TFmatrixID_0429		155	+	ggtCCCAC	TCP	AT1G35560;AT1G58100;AT2G45680;AT5G08330;AT5G23280;AT5G41030;Glyma02g11780.1;Glyma03g02090.1;Glyma05g01130.1;Glyma05g03610.1;Glyma06g20660.1;Glyma07g08710.1;Glyma07g25430.1;Glyma08g41070.1;Glyma09g42140.1;Glyma10g06510.1;Glyma10g38510.1;Glyma10g43190.1;Glyma11g20200.1;Glyma12g28970.1;Glyma13g20710.1;Glyma16g00580.1;Glyma17g14160.1;Glyma18g15410.1;Glyma20g23700.1;Glyma20g29330.1;Os01g0924400;Os02g0…
Vc9p318.12	UGT73C6(Vc9p318.12)	TFmatrixID_0429		328	-	GTGGGtcc	TCP	AT1G35560;AT1G58100;AT2G45680;AT5G08330;AT5G23280;AT5G41030;Glyma02g11780.1;Glyma03g02090.1;Glyma05g01130.1;Glyma05g03610.1;Glyma06g20660.1;Glyma07g08710.1;Glyma07g25430.1;Glyma08g41070.1;Glyma09g42140.1;Glyma10g06510.1;Glyma10g38510.1;Glyma10g43190.1;Glyma11g20200.1;Glyma12g28970.1;Glyma13g20710.1;Glyma16g00580.1;Glyma17g14160.1;Glyma18g15410.1;Glyma20g23700.1;Glyma20g29330.1;Os01g0924400;Os02g0…
Vc9p318.12	UGT73C6(Vc9p318.12)	TFmatrixID_0430		142	+	ggaCCCAC	TCP	AT1G67260;AT1G68800;AT2G31070;AT3G02150;Glyma04g22460.1;Glyma05g27370.1;Glyma06g22240.1;Glyma06g34330.1;Glyma08g10350.1;Glyma08g27150.1;Glyma10g39140.1;Glyma13g07480.1;Glyma13g29160.1;Glyma13g36840.1;Glyma15g09910.1;Glyma17g13060.1;Glyma18g50370.1;Glyma19g05910.1;Glyma20g28670.1;Os01g0763200;Os03g0706500;Os03g0785800;Os05g0513100;LOC_Os07g04510;Os07g0152000;LOC_Os12g02090;POPTR_0001s38480;POPTR_0…
Vc9p318.12	UGT73C6(Vc9p318.12)	TFmatrixID_0430		155	+	ggtCCCAC	TCP	AT1G67260;AT1G68800;AT2G31070;AT3G02150;Glyma04g22460.1;Glyma05g27370.1;Glyma06g22240.1;Glyma06g34330.1;Glyma08g10350.1;Glyma08g27150.1;Glyma10g39140.1;Glyma13g07480.1;Glyma13g29160.1;Glyma13g36840.1;Glyma15g09910.1;Glyma17g13060.1;Glyma18g50370.1;Glyma19g05910.1;Glyma20g28670.1;Os01g0763200;Os03g0706500;Os03g0785800;Os05g0513100;LOC_Os07g04510;Os07g0152000;LOC_Os12g02090;POPTR_0001s38480;POPTR_0…
Vc9p318.12	UGT73C6(Vc9p318.12)	TFmatrixID_0430		328	-	GTGGGtcc	TCP	AT1G67260;AT1G68800;AT2G31070;AT3G02150;Glyma04g22460.1;Glyma05g27370.1;Glyma06g22240.1;Glyma06g34330.1;Glyma08g10350.1;Glyma08g27150.1;Glyma10g39140.1;Glyma13g07480.1;Glyma13g29160.1;Glyma13g36840.1;Glyma15g09910.1;Glyma17g13060.1;Glyma18g50370.1;Glyma19g05910.1;Glyma20g28670.1;Os01g0763200;Os03g0706500;Os03g0785800;Os05g0513100;LOC_Os07g04510;Os07g0152000;LOC_Os12g02090;POPTR_0001s38480;POPTR_0…
Vc9p318.12	UGT73C6(Vc9p318.12)	TFmatrixID_0431		142	+	ggaCCCAC	TCP	AT1G35560;AT1G58100;AT1G72010;AT2G45680;AT5G23280;Glyma02g11780.1;Glyma03g02090.1;Glyma05g01130.1;Glyma05g03610.1;Glyma06g20660.1;Glyma07g08710.1;Glyma07g25430.1;Glyma08g41070.1;Glyma09g42140.1;Glyma10g38510.1;Glyma10g43190.1;Glyma11g20200.1;Glyma12g28970.1;Glyma13g20710.1;Glyma16g00580.1;Glyma17g14160.1;Glyma18g15410.1;Glyma20g23700.1;Glyma20g29330.1;Os01g0924400;Os02g0747400;Os04g0194600;Os04g0…
Vc9p318.12	UGT73C6(Vc9p318.12)	TFmatrixID_0431		155	+	ggtCCCAC	TCP	AT1G35560;AT1G58100;AT1G72010;AT2G45680;AT5G23280;Glyma02g11780.1;Glyma03g02090.1;Glyma05g01130.1;Glyma05g03610.1;Glyma06g20660.1;Glyma07g08710.1;Glyma07g25430.1;Glyma08g41070.1;Glyma09g42140.1;Glyma10g38510.1;Glyma10g43190.1;Glyma11g20200.1;Glyma12g28970.1;Glyma13g20710.1;Glyma16g00580.1;Glyma17g14160.1;Glyma18g15410.1;Glyma20g23700.1;Glyma20g29330.1;Os01g0924400;Os02g0747400;Os04g0194600;Os04g0…
Vc9p318.12	UGT73C6(Vc9p318.12)	TFmatrixID_0431		328	-	GTGGGtcc	TCP	AT1G35560;AT1G58100;AT1G72010;AT2G45680;AT5G23280;Glyma02g11780.1;Glyma03g02090.1;Glyma05g01130.1;Glyma05g03610.1;Glyma06g20660.1;Glyma07g08710.1;Glyma07g25430.1;Glyma08g41070.1;Glyma09g42140.1;Glyma10g38510.1;Glyma10g43190.1;Glyma11g20200.1;Glyma12g28970.1;Glyma13g20710.1;Glyma16g00580.1;Glyma17g14160.1;Glyma18g15410.1;Glyma20g23700.1;Glyma20g29330.1;Os01g0924400;Os02g0747400;Os04g0194600;Os04g0…
Vc9p318.12	UGT73C6(Vc9p318.12)	TFmatrixID_0432		112	+	gGGACCag	TCP	AT3G02150;AT5G08070;Glyma04g32340.1;Glyma05g00300.1;Glyma06g22240.1;Glyma08g27150.1;Glyma17g08760.1;Glyma18g50370.1;Glyma19g03810.1;Os01g0763200;POPTR_0004s11510;POPTR_0015s06980;POPTR_0017s13050;Sb03g035350;GRMZM2G120151;GRMZM2G166946
Vc9p318.12	UGT73C6(Vc9p318.12)	TFmatrixID_0432		358	-	ctGGTCCc	TCP	AT3G02150;AT5G08070;Glyma04g32340.1;Glyma05g00300.1;Glyma06g22240.1;Glyma08g27150.1;Glyma17g08760.1;Glyma18g50370.1;Glyma19g03810.1;Os01g0763200;POPTR_0004s11510;POPTR_0015s06980;POPTR_0017s13050;Sb03g035350;GRMZM2G120151;GRMZM2G166946
Vc9p318.12	UGT73C6(Vc9p318.12)	TFmatrixID_0432		557	-	gtGGTCCt	TCP	AT3G02150;AT5G08070;Glyma04g32340.1;Glyma05g00300.1;Glyma06g22240.1;Glyma08g27150.1;Glyma17g08760.1;Glyma18g50370.1;Glyma19g03810.1;Os01g0763200;POPTR_0004s11510;POPTR_0015s06980;POPTR_0017s13050;Sb03g035350;GRMZM2G120151;GRMZM2G166946
Vc9p318.12	UGT73C6(Vc9p318.12)	TFmatrixID_0433		140	+	ggggaCCCAC	TCP	AT1G35560;AT1G58100;AT1G72010;AT2G45680;AT5G08330;AT5G23280;Glyma02g11780.1;Glyma03g02090.1;Glyma05g01130.1;Glyma05g03610.1;Glyma06g20660.1;Glyma07g08710.1;Glyma07g25430.1;Glyma08g41070.1;Glyma09g42140.1;Glyma10g38510.1;Glyma10g43190.1;Glyma11g20200.1;Glyma12g28970.1;Glyma13g20710.1;Glyma16g00580.1;Glyma17g14160.1;Glyma18g15410.1;Glyma20g23700.1;Glyma20g29330.1;Os01g0924400;Os02g0747400;Os04g0194…
Vc9p318.12	UGT73C6(Vc9p318.12)	TFmatrixID_0433		153	+	tgggtCCCAC	TCP	AT1G35560;AT1G58100;AT1G72010;AT2G45680;AT5G08330;AT5G23280;Glyma02g11780.1;Glyma03g02090.1;Glyma05g01130.1;Glyma05g03610.1;Glyma06g20660.1;Glyma07g08710.1;Glyma07g25430.1;Glyma08g41070.1;Glyma09g42140.1;Glyma10g38510.1;Glyma10g43190.1;Glyma11g20200.1;Glyma12g28970.1;Glyma13g20710.1;Glyma16g00580.1;Glyma17g14160.1;Glyma18g15410.1;Glyma20g23700.1;Glyma20g29330.1;Os01g0924400;Os02g0747400;Os04g0194…
Vc9p318.12	UGT73C6(Vc9p318.12)	TFmatrixID_0433		328	-	GTGGGtcccc	TCP	AT1G35560;AT1G58100;AT1G72010;AT2G45680;AT5G08330;AT5G23280;Glyma02g11780.1;Glyma03g02090.1;Glyma05g01130.1;Glyma05g03610.1;Glyma06g20660.1;Glyma07g08710.1;Glyma07g25430.1;Glyma08g41070.1;Glyma09g42140.1;Glyma10g38510.1;Glyma10g43190.1;Glyma11g20200.1;Glyma12g28970.1;Glyma13g20710.1;Glyma16g00580.1;Glyma17g14160.1;Glyma18g15410.1;Glyma20g23700.1;Glyma20g29330.1;Os01g0924400;Os02g0747400;Os04g0194…
Vc9p318.12	UGT73C6(Vc9p318.12)	TFmatrixID_0434		263	+	ggGGGCCctc	TCP	AT1G35560;AT2G45680;AT5G08330;AT5G23280;Glyma02g11780.1;Glyma03g02090.1;Glyma05g01130.1;Glyma05g03610.1;Glyma07g08710.1;Glyma08g41070.1;Glyma09g42120.1;Glyma09g42140.1;Glyma10g06510.1;Glyma10g38510.1;Glyma10g43190.1;Glyma11g20200.1;Glyma13g20710.1;Glyma16g00580.1;Glyma17g14160.1;Glyma18g15410.1;Glyma20g00350.1;Glyma20g23700.1;Glyma20g29330.1;Os01g0924400;Os02g0635800;Os04g0194600;Os04g0526000;Os0…
Vc9p318.12	UGT73C6(Vc9p318.12)	TFmatrixID_0434		263	-	gggGGCCCtc	TCP	AT1G35560;AT2G45680;AT5G08330;AT5G23280;Glyma02g11780.1;Glyma03g02090.1;Glyma05g01130.1;Glyma05g03610.1;Glyma07g08710.1;Glyma08g41070.1;Glyma09g42120.1;Glyma09g42140.1;Glyma10g06510.1;Glyma10g38510.1;Glyma10g43190.1;Glyma11g20200.1;Glyma13g20710.1;Glyma16g00580.1;Glyma17g14160.1;Glyma18g15410.1;Glyma20g00350.1;Glyma20g23700.1;Glyma20g29330.1;Os01g0924400;Os02g0635800;Os04g0194600;Os04g0526000;Os0…
Vc9p318.12	UGT73C6(Vc9p318.12)	TFmatrixID_0435		142	+	ggaCCCAC	TCP	AT1G35560;AT2G45680;AT5G08330;AT5G23280;Glyma02g11780.1;Glyma03g02090.1;Glyma05g01130.1;Glyma05g03610.1;Glyma07g08710.1;Glyma08g41070.1;Glyma09g42120.1;Glyma09g42140.1;Glyma10g06510.1;Glyma10g38510.1;Glyma10g43190.1;Glyma11g20200.1;Glyma13g20710.1;Glyma16g00580.1;Glyma17g14160.1;Glyma18g15410.1;Glyma20g00350.1;Glyma20g23700.1;Glyma20g29330.1;Os01g0924400;Os04g0194600;Os04g0526000;Os09g0521300;OsI…
Vc9p318.12	UGT73C6(Vc9p318.12)	TFmatrixID_0435		155	+	ggtCCCAC	TCP	AT1G35560;AT2G45680;AT5G08330;AT5G23280;Glyma02g11780.1;Glyma03g02090.1;Glyma05g01130.1;Glyma05g03610.1;Glyma07g08710.1;Glyma08g41070.1;Glyma09g42120.1;Glyma09g42140.1;Glyma10g06510.1;Glyma10g38510.1;Glyma10g43190.1;Glyma11g20200.1;Glyma13g20710.1;Glyma16g00580.1;Glyma17g14160.1;Glyma18g15410.1;Glyma20g00350.1;Glyma20g23700.1;Glyma20g29330.1;Os01g0924400;Os04g0194600;Os04g0526000;Os09g0521300;OsI…
Vc9p318.12	UGT73C6(Vc9p318.12)	TFmatrixID_0435		328	-	GTGGGtcc	TCP	AT1G35560;AT2G45680;AT5G08330;AT5G23280;Glyma02g11780.1;Glyma03g02090.1;Glyma05g01130.1;Glyma05g03610.1;Glyma07g08710.1;Glyma08g41070.1;Glyma09g42120.1;Glyma09g42140.1;Glyma10g06510.1;Glyma10g38510.1;Glyma10g43190.1;Glyma11g20200.1;Glyma13g20710.1;Glyma16g00580.1;Glyma17g14160.1;Glyma18g15410.1;Glyma20g00350.1;Glyma20g23700.1;Glyma20g29330.1;Os01g0924400;Os04g0194600;Os04g0526000;Os09g0521300;OsI…
Vc9p318.12	UGT73C6(Vc9p318.12)	TFmatrixID_0436		110	+	ttgGGACCag	TCP	AT2G31070;Glyma06g34330.1;Glyma06g43720.1;Glyma12g14200.1;Glyma12g20160.1;Glyma12g33640.1;Glyma12g35720.1;Glyma13g34690.1;Glyma13g36840.1;POPTR_0001s38480;POPTR_0011s09890;POPTR_0013s12370;POPTR_0019s12110;Sb03g001940;Sb03g034918;AC205574.3_FG006;GRMZM2G015037
Vc9p318.12	UGT73C6(Vc9p318.12)	TFmatrixID_0436		358	-	ctGGTCCcaa	TCP	AT2G31070;Glyma06g34330.1;Glyma06g43720.1;Glyma12g14200.1;Glyma12g20160.1;Glyma12g33640.1;Glyma12g35720.1;Glyma13g34690.1;Glyma13g36840.1;POPTR_0001s38480;POPTR_0011s09890;POPTR_0013s12370;POPTR_0019s12110;Sb03g001940;Sb03g034918;AC205574.3_FG006;GRMZM2G015037
Vc9p318.12	UGT73C6(Vc9p318.12)	TFmatrixID_0436		557	-	gtGGTCCtgt	TCP	AT2G31070;Glyma06g34330.1;Glyma06g43720.1;Glyma12g14200.1;Glyma12g20160.1;Glyma12g33640.1;Glyma12g35720.1;Glyma13g34690.1;Glyma13g36840.1;POPTR_0001s38480;POPTR_0011s09890;POPTR_0013s12370;POPTR_0019s12110;Sb03g001940;Sb03g034918;AC205574.3_FG006;GRMZM2G015037
Vc9p318.12	UGT73C6(Vc9p318.12)	TFmatrixID_0437		141	+	gggaCCCACt	TCP	AT1G35560;AT1G58100;AT2G45680;AT5G08330;AT5G23280;Glyma02g11780.1;Glyma03g02090.1;Glyma05g01130.1;Glyma05g03610.1;Glyma06g20660.1;Glyma07g08710.1;Glyma07g25430.1;Glyma08g41070.1;Glyma09g42140.1;Glyma10g38510.1;Glyma10g43190.1;Glyma11g20200.1;Glyma12g28970.1;Glyma13g20710.1;Glyma16g00580.1;Glyma17g14160.1;Glyma18g15410.1;Glyma20g23700.1;Glyma20g29330.1;Os01g0924400;Os02g0747400;Os04g0194600;Os04g0…
Vc9p318.12	UGT73C6(Vc9p318.12)	TFmatrixID_0437		154	+	gggtCCCACa	TCP	AT1G35560;AT1G58100;AT2G45680;AT5G08330;AT5G23280;Glyma02g11780.1;Glyma03g02090.1;Glyma05g01130.1;Glyma05g03610.1;Glyma06g20660.1;Glyma07g08710.1;Glyma07g25430.1;Glyma08g41070.1;Glyma09g42140.1;Glyma10g38510.1;Glyma10g43190.1;Glyma11g20200.1;Glyma12g28970.1;Glyma13g20710.1;Glyma16g00580.1;Glyma17g14160.1;Glyma18g15410.1;Glyma20g23700.1;Glyma20g29330.1;Os01g0924400;Os02g0747400;Os04g0194600;Os04g0…
Vc9p318.12	UGT73C6(Vc9p318.12)	TFmatrixID_0437		327	-	aGTGGGtccc	TCP	AT1G35560;AT1G58100;AT2G45680;AT5G08330;AT5G23280;Glyma02g11780.1;Glyma03g02090.1;Glyma05g01130.1;Glyma05g03610.1;Glyma06g20660.1;Glyma07g08710.1;Glyma07g25430.1;Glyma08g41070.1;Glyma09g42140.1;Glyma10g38510.1;Glyma10g43190.1;Glyma11g20200.1;Glyma12g28970.1;Glyma13g20710.1;Glyma16g00580.1;Glyma17g14160.1;Glyma18g15410.1;Glyma20g23700.1;Glyma20g29330.1;Os01g0924400;Os02g0747400;Os04g0194600;Os04g0…
Vc9p318.12	UGT73C6(Vc9p318.12)	TFmatrixID_0438		141	+	gggaCCCAC	TCP	AT1G35560;AT1G58100;AT1G72010;AT2G45680;AT5G08330;AT5G23280;AT5G41030;Glyma02g11780.1;Glyma03g02090.1;Glyma05g01130.1;Glyma05g03610.1;Glyma06g20660.1;Glyma07g08710.1;Glyma07g25430.1;Glyma08g41070.1;Glyma09g42140.1;Glyma10g06510.1;Glyma10g38510.1;Glyma10g43190.1;Glyma11g20200.1;Glyma12g28970.1;Glyma13g20710.1;Glyma16g00580.1;Glyma17g14160.1;Glyma18g15410.1;Glyma19g26560.1;Glyma20g23700.1;Glyma20g2…
Vc9p318.12	UGT73C6(Vc9p318.12)	TFmatrixID_0438		154	+	gggtCCCAC	TCP	AT1G35560;AT1G58100;AT1G72010;AT2G45680;AT5G08330;AT5G23280;AT5G41030;Glyma02g11780.1;Glyma03g02090.1;Glyma05g01130.1;Glyma05g03610.1;Glyma06g20660.1;Glyma07g08710.1;Glyma07g25430.1;Glyma08g41070.1;Glyma09g42140.1;Glyma10g06510.1;Glyma10g38510.1;Glyma10g43190.1;Glyma11g20200.1;Glyma12g28970.1;Glyma13g20710.1;Glyma16g00580.1;Glyma17g14160.1;Glyma18g15410.1;Glyma19g26560.1;Glyma20g23700.1;Glyma20g2…
Vc9p318.12	UGT73C6(Vc9p318.12)	TFmatrixID_0438		328	-	GTGGGtccc	TCP	AT1G35560;AT1G58100;AT1G72010;AT2G45680;AT5G08330;AT5G23280;AT5G41030;Glyma02g11780.1;Glyma03g02090.1;Glyma05g01130.1;Glyma05g03610.1;Glyma06g20660.1;Glyma07g08710.1;Glyma07g25430.1;Glyma08g41070.1;Glyma09g42140.1;Glyma10g06510.1;Glyma10g38510.1;Glyma10g43190.1;Glyma11g20200.1;Glyma12g28970.1;Glyma13g20710.1;Glyma16g00580.1;Glyma17g14160.1;Glyma18g15410.1;Glyma19g26560.1;Glyma20g23700.1;Glyma20g2…
Vc9p318.12	UGT73C6(Vc9p318.12)	TFmatrixID_0439		142	+	ggaCCCAC	TCP	AT1G35560;AT1G58100;AT1G72010;AT2G45680;AT5G23280;Glyma02g11780.1;Glyma03g02090.1;Glyma05g01130.1;Glyma05g03610.1;Glyma06g20660.1;Glyma07g08710.1;Glyma07g25430.1;Glyma08g41070.1;Glyma09g42140.1;Glyma10g06510.1;Glyma10g38510.1;Glyma10g43190.1;Glyma11g20200.1;Glyma12g28970.1;Glyma13g20710.1;Glyma16g00580.1;Glyma17g14160.1;Glyma18g15410.1;Glyma20g23700.1;Glyma20g29330.1;Os01g0924400;Os02g0747400;Os0…
Vc9p318.12	UGT73C6(Vc9p318.12)	TFmatrixID_0439		155	+	ggtCCCAC	TCP	AT1G35560;AT1G58100;AT1G72010;AT2G45680;AT5G23280;Glyma02g11780.1;Glyma03g02090.1;Glyma05g01130.1;Glyma05g03610.1;Glyma06g20660.1;Glyma07g08710.1;Glyma07g25430.1;Glyma08g41070.1;Glyma09g42140.1;Glyma10g06510.1;Glyma10g38510.1;Glyma10g43190.1;Glyma11g20200.1;Glyma12g28970.1;Glyma13g20710.1;Glyma16g00580.1;Glyma17g14160.1;Glyma18g15410.1;Glyma20g23700.1;Glyma20g29330.1;Os01g0924400;Os02g0747400;Os0…
Vc9p318.12	UGT73C6(Vc9p318.12)	TFmatrixID_0439		328	-	GTGGGtcc	TCP	AT1G35560;AT1G58100;AT1G72010;AT2G45680;AT5G23280;Glyma02g11780.1;Glyma03g02090.1;Glyma05g01130.1;Glyma05g03610.1;Glyma06g20660.1;Glyma07g08710.1;Glyma07g25430.1;Glyma08g41070.1;Glyma09g42140.1;Glyma10g06510.1;Glyma10g38510.1;Glyma10g43190.1;Glyma11g20200.1;Glyma12g28970.1;Glyma13g20710.1;Glyma16g00580.1;Glyma17g14160.1;Glyma18g15410.1;Glyma20g23700.1;Glyma20g29330.1;Os01g0924400;Os02g0747400;Os0…
Vc9p318.12	UGT73C6(Vc9p318.12)	TFmatrixID_0440		112	+	gGGACCag	TCP	AT1G67260;AT2G31070;AT3G02150;Glyma04g32340.1;Glyma05g00300.1;Glyma05g27370.1;Glyma06g22240.1;Glyma06g34330.1;Glyma08g10350.1;Glyma08g27150.1;Glyma08g28690.1;Glyma10g39140.1;Glyma13g07480.1;Glyma13g29160.1;Glyma13g36840.1;Glyma15g09910.1;Glyma17g13060.1;Glyma18g50370.1;Glyma18g51580.1;Glyma19g05910.1;Glyma20g28670.1;Os01g0763200;Os03g0706500;Os03g0785800;Os05g0513100;LOC_Os07g04510;Os07g0152000;L…
Vc9p318.12	UGT73C6(Vc9p318.12)	TFmatrixID_0440		358	-	ctGGTCCc	TCP	AT1G67260;AT2G31070;AT3G02150;Glyma04g32340.1;Glyma05g00300.1;Glyma05g27370.1;Glyma06g22240.1;Glyma06g34330.1;Glyma08g10350.1;Glyma08g27150.1;Glyma08g28690.1;Glyma10g39140.1;Glyma13g07480.1;Glyma13g29160.1;Glyma13g36840.1;Glyma15g09910.1;Glyma17g13060.1;Glyma18g50370.1;Glyma18g51580.1;Glyma19g05910.1;Glyma20g28670.1;Os01g0763200;Os03g0706500;Os03g0785800;Os05g0513100;LOC_Os07g04510;Os07g0152000;L…
Vc9p318.12	UGT73C6(Vc9p318.12)	TFmatrixID_0440		557	-	gtGGTCCt	TCP	AT1G67260;AT2G31070;AT3G02150;Glyma04g32340.1;Glyma05g00300.1;Glyma05g27370.1;Glyma06g22240.1;Glyma06g34330.1;Glyma08g10350.1;Glyma08g27150.1;Glyma08g28690.1;Glyma10g39140.1;Glyma13g07480.1;Glyma13g29160.1;Glyma13g36840.1;Glyma15g09910.1;Glyma17g13060.1;Glyma18g50370.1;Glyma18g51580.1;Glyma19g05910.1;Glyma20g28670.1;Os01g0763200;Os03g0706500;Os03g0785800;Os05g0513100;LOC_Os07g04510;Os07g0152000;L…
Vc9p318.12	UGT73C6(Vc9p318.12)	TFmatrixID_0441		737	+	tCTGAAat	WRC; GRF	AT2G06200
Vc9p318.12	UGT73C6(Vc9p318.12)	TFmatrixID_0441		938	+	tCTGAAat	WRC; GRF	AT2G06200
Vc9p318.12	UGT73C6(Vc9p318.12)	TFmatrixID_0441		1231	+	tCTGAAaa	WRC; GRF	AT2G06200
Vc9p318.12	UGT73C6(Vc9p318.12)	TFmatrixID_0442		70	-	aagTTGACtt	WRKY	AT1G18860;AT1G29280;AT1G29860;AT1G30650;AT1G55600;AT1G62300;AT1G64000;AT1G66550;AT1G66560;AT1G68150;AT1G69810;AT2G21900;AT2G34830;AT2G40740;AT2G40750;AT2G44745;AT2G46400;AT3G01970;AT3G04670;AT3G56400;AT3G58710;AT3G62340;AT4G04450;AT4G11070;AT4G18170;AT4G22070;AT4G23810;AT4G24240;AT4G39410;AT5G15130;AT5G22570;AT5G26170;AT5G28650;AT5G41570;AT5G43290;AT5G45050;AT5G45260;Glyma01g05050.1;Glyma01g06870…
Vc9p318.12	UGT73C6(Vc9p318.12)	TFmatrixID_0442		1387	-	tcgTTGACaa	WRKY	AT1G18860;AT1G29280;AT1G29860;AT1G30650;AT1G55600;AT1G62300;AT1G64000;AT1G66550;AT1G66560;AT1G68150;AT1G69810;AT2G21900;AT2G34830;AT2G40740;AT2G40750;AT2G44745;AT2G46400;AT3G01970;AT3G04670;AT3G56400;AT3G58710;AT3G62340;AT4G04450;AT4G11070;AT4G18170;AT4G22070;AT4G23810;AT4G24240;AT4G39410;AT5G15130;AT5G22570;AT5G26170;AT5G28650;AT5G41570;AT5G43290;AT5G45050;AT5G45260;Glyma01g05050.1;Glyma01g06870…
Vc9p318.12	UGT73C6(Vc9p318.12)	TFmatrixID_0444		71	-	agTTGACttt	WRKY	AT1G18860;AT1G29280;AT1G29860;AT1G55600;AT1G62300;AT1G64000;AT1G66550;AT1G66560;AT1G68150;AT1G69310;AT1G69810;AT1G80590;AT2G21900;AT2G34830;AT2G40740;AT2G44745;AT2G46400;AT3G01970;AT3G04670;AT3G56400;AT3G58710;AT3G62340;AT4G04450;AT4G11070;AT4G18170;AT4G22070;AT4G23810;AT4G24240;AT4G39410;AT5G15130;AT5G22570;AT5G26170;AT5G28650;AT5G41570;AT5G43290;AT5G45050;Glyma01g05050.1;Glyma01g06870.1;Glyma01…
Vc9p318.12	UGT73C6(Vc9p318.12)	TFmatrixID_0445		72	-	gTTGACtt	WRKY	AT1G18860;AT1G29280;AT1G29860;AT1G55600;AT1G62300;AT1G64000;AT1G68150;AT1G69810;AT1G80840;AT2G21900;AT2G34830;AT2G44745;AT3G01970;AT3G04670;AT3G58710;AT3G62340;AT4G04450;AT4G18170;AT4G22070;AT4G24240;AT4G39410;AT5G15130;AT5G26170;AT5G28650;AT5G41570;AT5G43290;AT5G45050;AT5G45260;Glyma01g05050.1;Glyma01g06870.1;Glyma01g39600.1;Glyma01g43130.1;Glyma02g01030.1;Glyma02g01420.1;Glyma02g02430.1;Glyma02…
Vc9p318.12	UGT73C6(Vc9p318.12)	TFmatrixID_0445		1985	+	aaGTCAAg	WRKY	AT1G18860;AT1G29280;AT1G29860;AT1G55600;AT1G62300;AT1G64000;AT1G68150;AT1G69810;AT1G80840;AT2G21900;AT2G34830;AT2G44745;AT3G01970;AT3G04670;AT3G58710;AT3G62340;AT4G04450;AT4G18170;AT4G22070;AT4G24240;AT4G39410;AT5G15130;AT5G26170;AT5G28650;AT5G41570;AT5G43290;AT5G45050;AT5G45260;Glyma01g05050.1;Glyma01g06870.1;Glyma01g39600.1;Glyma01g43130.1;Glyma02g01030.1;Glyma02g01420.1;Glyma02g02430.1;Glyma02…
Vc9p318.12	UGT73C6(Vc9p318.12)	TFmatrixID_0446		70	-	aagTTGACtt	WRKY	AT1G18860;AT1G29280;AT1G29860;AT1G55600;AT1G62300;AT1G64000;AT1G68150;AT1G69810;AT2G21900;AT2G23320;AT2G34830;AT2G40740;AT2G44745;AT3G01970;AT3G04670;AT3G58710;AT3G62340;AT4G04450;AT4G11070;AT4G18170;AT4G22070;AT4G23810;AT4G24240;AT4G39410;AT5G15130;AT5G22570;AT5G26170;AT5G28650;AT5G41570;AT5G43290;AT5G45050;AT5G45260;Glyma01g05050.1;Glyma01g06870.1;Glyma01g39600.1;Glyma01g43130.1;Glyma01g43420.1…
Vc9p318.12	UGT73C6(Vc9p318.12)	TFmatrixID_0447		71	-	agTTGACttt	WRKY	AT1G18860;AT1G29280;AT1G29860;AT1G55600;AT1G62300;AT1G64000;AT1G68150;AT1G69810;AT2G21900;AT2G24570;AT2G34830;AT2G40740;AT2G44745;AT3G01970;AT3G04670;AT3G58710;AT3G62340;AT4G04450;AT4G11070;AT4G18170;AT4G22070;AT4G23810;AT4G24240;AT4G39410;AT5G15130;AT5G22570;AT5G26170;AT5G28650;AT5G41570;AT5G43290;AT5G45050;AT5G45260;Glyma01g05050.1;Glyma01g06870.1;Glyma01g39600.1;Glyma01g43130.1;Glyma01g43420.1…
Vc9p318.12	UGT73C6(Vc9p318.12)	TFmatrixID_0447		1388	-	cgTTGACaac	WRKY	AT1G18860;AT1G29280;AT1G29860;AT1G55600;AT1G62300;AT1G64000;AT1G68150;AT1G69810;AT2G21900;AT2G24570;AT2G34830;AT2G40740;AT2G44745;AT3G01970;AT3G04670;AT3G58710;AT3G62340;AT4G04450;AT4G11070;AT4G18170;AT4G22070;AT4G23810;AT4G24240;AT4G39410;AT5G15130;AT5G22570;AT5G26170;AT5G28650;AT5G41570;AT5G43290;AT5G45050;AT5G45260;Glyma01g05050.1;Glyma01g06870.1;Glyma01g39600.1;Glyma01g43130.1;Glyma01g43420.1…
Vc9p318.12	UGT73C6(Vc9p318.12)	TFmatrixID_0448		70	-	aagTTGACttt	WRKY	AT1G18860;AT1G29280;AT1G29860;AT1G55600;AT1G62300;AT1G64000;AT1G68150;AT1G69810;AT2G21900;AT2G25000;AT2G34830;AT2G44745;AT2G46400;AT3G01970;AT3G04670;AT3G58710;AT3G62340;AT4G04450;AT4G11070;AT4G18170;AT4G22070;AT4G24240;AT4G39410;AT5G15130;AT5G26170;AT5G28650;AT5G41570;AT5G43290;AT5G45050;Glyma01g05050.1;Glyma01g06870.1;Glyma01g39600.1;Glyma01g43130.1;Glyma01g43420.1;Glyma02g01030.1;Glyma02g01420…
Vc9p318.12	UGT73C6(Vc9p318.12)	TFmatrixID_0448		1387	-	tcgTTGACaac	WRKY	AT1G18860;AT1G29280;AT1G29860;AT1G55600;AT1G62300;AT1G64000;AT1G68150;AT1G69810;AT2G21900;AT2G25000;AT2G34830;AT2G44745;AT2G46400;AT3G01970;AT3G04670;AT3G58710;AT3G62340;AT4G04450;AT4G11070;AT4G18170;AT4G22070;AT4G24240;AT4G39410;AT5G15130;AT5G26170;AT5G28650;AT5G41570;AT5G43290;AT5G45050;Glyma01g05050.1;Glyma01g06870.1;Glyma01g39600.1;Glyma01g43130.1;Glyma01g43420.1;Glyma02g01030.1;Glyma02g01420…
Vc9p318.12	UGT73C6(Vc9p318.12)	TFmatrixID_0450		71	-	agTTGACttt	WRKY	AT1G18860;AT1G29280;AT1G29860;AT1G55600;AT1G62300;AT1G64000;AT1G68150;AT1G69810;AT2G21900;AT2G30590;AT2G34830;AT2G40740;AT2G44745;AT3G01970;AT3G04670;AT3G58710;AT3G62340;AT4G04450;AT4G11070;AT4G18170;AT4G22070;AT4G24240;AT4G39410;AT5G15130;AT5G22570;AT5G26170;AT5G28650;AT5G41570;AT5G43290;AT5G45050;AT5G45260;Glyma01g05050.1;Glyma01g06870.1;Glyma01g39600.1;Glyma01g43130.1;Glyma01g43420.1;Glyma02g0…
Vc9p318.12	UGT73C6(Vc9p318.12)	TFmatrixID_0450		1388	-	cgTTGACaac	WRKY	AT1G18860;AT1G29280;AT1G29860;AT1G55600;AT1G62300;AT1G64000;AT1G68150;AT1G69810;AT2G21900;AT2G30590;AT2G34830;AT2G40740;AT2G44745;AT3G01970;AT3G04670;AT3G58710;AT3G62340;AT4G04450;AT4G11070;AT4G18170;AT4G22070;AT4G24240;AT4G39410;AT5G15130;AT5G22570;AT5G26170;AT5G28650;AT5G41570;AT5G43290;AT5G45050;AT5G45260;Glyma01g05050.1;Glyma01g06870.1;Glyma01g39600.1;Glyma01g43130.1;Glyma01g43420.1;Glyma02g0…
Vc9p318.12	UGT73C6(Vc9p318.12)	TFmatrixID_0451		71	-	agTTGACttt	WRKY	AT1G13960;AT2G03340;AT2G37260;AT2G38470;AT3G01080;AT4G12020;AT4G26440;AT4G26640;AT4G30935;AT5G07100;Glyma01g06550.1;Glyma01g31920.1;Glyma02g12490.1;Glyma02g36510.1;Glyma02g39870.1;Glyma02g46690.1;Glyma02g47650.1;Glyma03g05220.1;Glyma03g33380.1;Glyma04g12830.1;Glyma06g27440.1;Glyma06g47880.1;Glyma07g35380.1;Glyma08g26230.1;Glyma08g43770.1;Glyma09g38580.1;Glyma09g41670.1;Glyma11g29720.1;Glyma12g239…
Vc9p318.12	UGT73C6(Vc9p318.12)	TFmatrixID_0452		70	-	aagTTGACtt	WRKY	AT1G18860;AT1G29280;AT1G29860;AT1G55600;AT1G62300;AT1G64000;AT1G66550;AT1G66560;AT1G68150;AT1G69810;AT2G21900;AT2G34830;AT2G40740;AT2G40750;AT2G44745;AT2G46130;AT2G46400;AT3G01970;AT3G04670;AT3G56400;AT3G58710;AT3G62340;AT4G04450;AT4G11070;AT4G18170;AT4G22070;AT4G23810;AT4G24240;AT4G39410;AT5G15130;AT5G22570;AT5G26170;AT5G28650;AT5G41570;AT5G43290;AT5G45050;AT5G45260;Glyma01g05050.1;Glyma01g06870…
Vc9p318.12	UGT73C6(Vc9p318.12)	TFmatrixID_0453		71	-	agTTGACt	WRKY	AT1G18860;AT1G29280;AT1G29860;AT1G55600;AT1G62300;AT1G64000;AT1G66550;AT1G66560;AT1G68150;AT1G69810;AT1G80590;AT2G21900;AT2G34830;AT2G40740;AT2G40750;AT2G44745;AT2G46400;AT2G47260;AT3G01970;AT3G04670;AT3G56400;AT3G58710;AT3G62340;AT4G04450;AT4G11070;AT4G18170;AT4G22070;AT4G23810;AT4G24240;AT4G39410;AT5G15130;AT5G22570;AT5G26170;AT5G28650;AT5G41570;AT5G43290;AT5G45050;Glyma01g05050.1;Glyma01g06870…
Vc9p318.12	UGT73C6(Vc9p318.12)	TFmatrixID_0453		1388	-	cgTTGACa	WRKY	AT1G18860;AT1G29280;AT1G29860;AT1G55600;AT1G62300;AT1G64000;AT1G66550;AT1G66560;AT1G68150;AT1G69810;AT1G80590;AT2G21900;AT2G34830;AT2G40740;AT2G40750;AT2G44745;AT2G46400;AT2G47260;AT3G01970;AT3G04670;AT3G56400;AT3G58710;AT3G62340;AT4G04450;AT4G11070;AT4G18170;AT4G22070;AT4G23810;AT4G24240;AT4G39410;AT5G15130;AT5G22570;AT5G26170;AT5G28650;AT5G41570;AT5G43290;AT5G45050;Glyma01g05050.1;Glyma01g06870…
Vc9p318.12	UGT73C6(Vc9p318.12)	TFmatrixID_0454		71	-	agTTGACttt	WRKY	AT1G18860;AT1G29280;AT1G29860;AT1G55600;AT1G62300;AT1G64000;AT1G66550;AT1G66560;AT1G68150;AT1G69810;AT1G80590;AT2G21900;AT2G34830;AT2G40740;AT2G40750;AT2G44745;AT2G46400;AT3G01970;AT3G04670;AT3G56400;AT3G58710;AT3G62340;AT4G01250;AT4G04450;AT4G11070;AT4G18170;AT4G22070;AT4G23810;AT4G24240;AT4G39410;AT5G15130;AT5G22570;AT5G26170;AT5G28650;AT5G41570;AT5G43290;AT5G45050;AT5G45260;Glyma01g05050.1;Gly…
Vc9p318.12	UGT73C6(Vc9p318.12)	TFmatrixID_0455		70	-	aagTTGACttt	WRKY	AT1G18860;AT1G29280;AT1G29860;AT1G55600;AT1G62300;AT1G64000;AT1G66550;AT1G66560;AT1G68150;AT1G69810;AT2G21900;AT2G34830;AT2G40740;AT2G44745;AT2G46400;AT3G01970;AT3G04670;AT3G58710;AT3G62340;AT4G01720;AT4G04450;AT4G11070;AT4G18170;AT4G22070;AT4G23810;AT4G24240;AT4G39410;AT5G15130;AT5G26170;AT5G28650;AT5G41570;AT5G43290;AT5G45050;AT5G45260;Glyma01g05050.1;Glyma01g06870.1;Glyma01g39600.1;Glyma01g431…
Vc9p318.12	UGT73C6(Vc9p318.12)	TFmatrixID_0455		1387	-	tcgTTGACaac	WRKY	AT1G18860;AT1G29280;AT1G29860;AT1G55600;AT1G62300;AT1G64000;AT1G66550;AT1G66560;AT1G68150;AT1G69810;AT2G21900;AT2G34830;AT2G40740;AT2G44745;AT2G46400;AT3G01970;AT3G04670;AT3G58710;AT3G62340;AT4G01720;AT4G04450;AT4G11070;AT4G18170;AT4G22070;AT4G23810;AT4G24240;AT4G39410;AT5G15130;AT5G26170;AT5G28650;AT5G41570;AT5G43290;AT5G45050;AT5G45260;Glyma01g05050.1;Glyma01g06870.1;Glyma01g39600.1;Glyma01g431…
Vc9p318.12	UGT73C6(Vc9p318.12)	TFmatrixID_0456		71	-	agTTGACttt	WRKY	AT1G18860;AT1G29280;AT1G29860;AT1G55600;AT1G62300;AT1G64000;AT1G66560;AT1G68150;AT1G69810;AT1G80590;AT2G21900;AT2G34830;AT2G40740;AT2G40750;AT2G44745;AT2G46400;AT3G01970;AT3G04670;AT3G56400;AT3G58710;AT3G62340;AT4G04450;AT4G11070;AT4G18170;AT4G22070;AT4G23550;AT4G23810;AT4G24240;AT4G39410;AT5G15130;AT5G22570;AT5G26170;AT5G28650;AT5G41570;AT5G43290;AT5G45050;AT5G45260;Glyma01g05050.1;Glyma01g06870…
Vc9p318.12	UGT73C6(Vc9p318.12)	TFmatrixID_0456		1388	-	cgTTGACaac	WRKY	AT1G18860;AT1G29280;AT1G29860;AT1G55600;AT1G62300;AT1G64000;AT1G66560;AT1G68150;AT1G69810;AT1G80590;AT2G21900;AT2G34830;AT2G40740;AT2G40750;AT2G44745;AT2G46400;AT3G01970;AT3G04670;AT3G56400;AT3G58710;AT3G62340;AT4G04450;AT4G11070;AT4G18170;AT4G22070;AT4G23550;AT4G23810;AT4G24240;AT4G39410;AT5G15130;AT5G22570;AT5G26170;AT5G28650;AT5G41570;AT5G43290;AT5G45050;AT5G45260;Glyma01g05050.1;Glyma01g06870…
Vc9p318.12	UGT73C6(Vc9p318.12)	TFmatrixID_0457		70	-	aagTTGACtt	WRKY	AT1G18860;AT1G29280;AT1G29860;AT1G55600;AT1G62300;AT1G64000;AT1G66560;AT1G68150;AT1G69810;AT2G21900;AT2G34830;AT2G40740;AT2G44745;AT2G46400;AT3G01970;AT3G04670;AT3G56400;AT3G58710;AT3G62340;AT4G04450;AT4G11070;AT4G18170;AT4G22070;AT4G23810;AT4G24240;AT4G31550;AT4G39410;AT5G15130;AT5G22570;AT5G26170;AT5G28650;AT5G41570;AT5G43290;AT5G45050;AT5G45260;Glyma01g05050.1;Glyma01g06870.1;Glyma01g39600.1;G…
Vc9p318.12	UGT73C6(Vc9p318.12)	TFmatrixID_0457		1387	-	tcgTTGACaa	WRKY	AT1G18860;AT1G29280;AT1G29860;AT1G55600;AT1G62300;AT1G64000;AT1G66560;AT1G68150;AT1G69810;AT2G21900;AT2G34830;AT2G40740;AT2G44745;AT2G46400;AT3G01970;AT3G04670;AT3G56400;AT3G58710;AT3G62340;AT4G04450;AT4G11070;AT4G18170;AT4G22070;AT4G23810;AT4G24240;AT4G31550;AT4G39410;AT5G15130;AT5G22570;AT5G26170;AT5G28650;AT5G41570;AT5G43290;AT5G45050;AT5G45260;Glyma01g05050.1;Glyma01g06870.1;Glyma01g39600.1;G…
Vc9p318.12	UGT73C6(Vc9p318.12)	TFmatrixID_0459		72	-	gTTGACtt	WRKY	AT1G29280;AT1G29860;AT1G64000;AT1G66550;AT1G66560;AT1G69810;AT1G80590;AT2G40740;AT2G40750;AT2G44745;AT2G46400;AT3G01970;AT3G56400;AT3G62340;AT4G11070;AT4G18170;AT4G23810;AT4G24240;AT5G01900;AT5G22570;AT5G26170;AT5G41570;AT5G43290;AT5G45050;AT5G45260;Glyma01g06870.1;Glyma01g39600.1;Glyma01g43420.1;Glyma02g01420.1;Glyma02g12830.1;Glyma02g45530.1;Glyma02g46280.1;Glyma03g00460.1;Glyma03g25770.1;Glyma…
Vc9p318.12	UGT73C6(Vc9p318.12)	TFmatrixID_0459		1389	-	gTTGACaa	WRKY	AT1G29280;AT1G29860;AT1G64000;AT1G66550;AT1G66560;AT1G69810;AT1G80590;AT2G40740;AT2G40750;AT2G44745;AT2G46400;AT3G01970;AT3G56400;AT3G62340;AT4G11070;AT4G18170;AT4G23810;AT4G24240;AT5G01900;AT5G22570;AT5G26170;AT5G41570;AT5G43290;AT5G45050;AT5G45260;Glyma01g06870.1;Glyma01g39600.1;Glyma01g43420.1;Glyma02g01420.1;Glyma02g12830.1;Glyma02g45530.1;Glyma02g46280.1;Glyma03g00460.1;Glyma03g25770.1;Glyma…
Vc9p318.12	UGT73C6(Vc9p318.12)	TFmatrixID_0460		72	-	gTTGACtt	WRKY	AT1G18860;AT1G29280;AT1G29860;AT1G55600;AT1G62300;AT1G64000;AT1G66550;AT1G66560;AT1G68150;AT1G69810;AT2G21900;AT2G34830;AT2G40740;AT2G40750;AT2G44745;AT3G01970;AT3G04670;AT3G56400;AT3G58710;AT3G62340;AT4G04450;AT4G11070;AT4G18170;AT4G22070;AT4G23810;AT4G24240;AT4G39410;AT5G13080;AT5G15130;AT5G22570;AT5G26170;AT5G28650;AT5G41570;AT5G43290;AT5G45050;AT5G45260;Glyma01g05050.1;Glyma01g06870.1;Glyma01…
Vc9p318.12	UGT73C6(Vc9p318.12)	TFmatrixID_0461		69	-	aaagTTGACt	WRKY	AT1G18860;AT1G29280;AT1G62300;AT1G64000;AT1G66550;AT1G66560;AT1G68150;AT1G80590;AT2G34830;AT2G40740;AT2G40750;AT2G44745;AT2G46400;AT3G01970;AT3G04670;AT3G56400;AT3G58710;AT3G62340;AT4G04450;AT4G11070;AT4G22070;AT4G23810;AT4G24240;AT4G39410;AT5G15130;AT5G22570;AT5G24110;AT5G26170;AT5G28650;AT5G41570;AT5G43290;AT5G45050;AT5G45260;Glyma01g05050.1;Glyma01g06870.1;Glyma01g39600.1;Glyma01g43130.1;Glyma…
Vc9p318.12	UGT73C6(Vc9p318.12)	TFmatrixID_0461		1386	-	ttcgTTGACa	WRKY	AT1G18860;AT1G29280;AT1G62300;AT1G64000;AT1G66550;AT1G66560;AT1G68150;AT1G80590;AT2G34830;AT2G40740;AT2G40750;AT2G44745;AT2G46400;AT3G01970;AT3G04670;AT3G56400;AT3G58710;AT3G62340;AT4G04450;AT4G11070;AT4G22070;AT4G23810;AT4G24240;AT4G39410;AT5G15130;AT5G22570;AT5G24110;AT5G26170;AT5G28650;AT5G41570;AT5G43290;AT5G45050;AT5G45260;Glyma01g05050.1;Glyma01g06870.1;Glyma01g39600.1;Glyma01g43130.1;Glyma…
Vc9p318.12	UGT73C6(Vc9p318.12)	TFmatrixID_0462		71	-	agTTGACtt	WRKY	AT1G18860;AT1G29280;AT1G29860;AT1G55600;AT1G62300;AT1G64000;AT1G66550;AT1G66560;AT1G68150;AT1G69810;AT1G80590;AT2G21900;AT2G34830;AT2G44745;AT3G01970;AT3G04670;AT3G58710;AT3G62340;AT4G04450;AT4G11070;AT4G18170;AT4G22070;AT4G23810;AT4G24240;AT4G39410;AT5G15130;AT5G22570;AT5G26170;AT5G28650;AT5G41570;AT5G43290;AT5G45050;AT5G45260;AT5G46350;Glyma01g05050.1;Glyma01g06870.1;Glyma01g39600.1;Glyma01g431…
Vc9p318.12	UGT73C6(Vc9p318.12)	TFmatrixID_0463		71	-	agTTGACttt	WRKY	AT1G18860;AT1G29280;AT1G29860;AT1G55600;AT1G62300;AT1G64000;AT1G66550;AT1G66560;AT1G68150;AT1G69810;AT1G80590;AT2G21900;AT2G34830;AT2G40740;AT2G40750;AT2G44745;AT2G46400;AT3G01970;AT3G04670;AT3G56400;AT3G58710;AT3G62340;AT4G04450;AT4G11070;AT4G18170;AT4G22070;AT4G23810;AT4G24240;AT4G39410;AT5G15130;AT5G22570;AT5G26170;AT5G28650;AT5G41570;AT5G43290;AT5G45050;AT5G45260;AT5G49520;Glyma01g05050.1;Gly…
Vc9p318.12	UGT73C6(Vc9p318.12)	TFmatrixID_0464		71	-	agTTGACtt	WRKY	AT1G18860;AT1G29280;AT1G29860;AT1G55600;AT1G62300;AT1G64000;AT1G66550;AT1G66560;AT1G68150;AT1G69810;AT1G80590;AT2G21900;AT2G34830;AT2G40740;AT2G40750;AT2G44745;AT2G46400;AT3G01970;AT3G04670;AT3G56400;AT3G58710;AT3G62340;AT4G04450;AT4G11070;AT4G18170;AT4G22070;AT4G23810;AT4G24240;AT4G39410;AT5G15130;AT5G22570;AT5G26170;AT5G28650;AT5G41570;AT5G43290;AT5G45050;AT5G45260;AT5G52830;Glyma01g05050.1;Gly…
Vc9p318.12	UGT73C6(Vc9p318.12)	TFmatrixID_0466		71	-	agTTGACttt	WRKY	AT1G18860;AT1G29280;AT1G29860;AT1G55600;AT1G62300;AT1G64000;AT1G68150;AT1G69810;AT2G21900;AT2G34830;AT2G44745;AT3G01970;AT3G04670;AT3G58710;AT3G62340;AT4G04450;AT4G18170;AT4G22070;AT4G24240;AT4G39410;AT5G15130;AT5G26170;AT5G28650;AT5G41570;AT5G43290;AT5G45050;AT5G64810;Glyma01g05050.1;Glyma01g06870.1;Glyma01g39600.1;Glyma01g43130.1;Glyma02g01030.1;Glyma02g01420.1;Glyma02g02430.1;Glyma02g12830.1;G…
Vc9p318.12	UGT73C6(Vc9p318.12)	TFmatrixID_0467		68	-	caaagTTGACttt	WRKY	Os01g0656400;POPTR_0002s17010;POPTR_0012s01380;POPTR_0014s09190;Sb06g013835;AC205562.3_FG002
Vc9p318.12	UGT73C6(Vc9p318.12)	TFmatrixID_0467		1385	-	tttcgTTGACaac	WRKY	Os01g0656400;POPTR_0002s17010;POPTR_0012s01380;POPTR_0014s09190;Sb06g013835;AC205562.3_FG002
Vc9p318.12	UGT73C6(Vc9p318.12)	TFmatrixID_0470		1543	+	aataCCAAAagaggggca	MADS box; MIKC; M-type;MIKC;M-type	AT4G18960;AT4G22950;AT5G51870;AT5G60910;AT5G62165;AT1G22130;AT1G26310;AT1G77980;AT2G45650;AT3G30260;AT3G57230;AT3G57390;AT3G61120;AT4G09960;AT4G11880;Glyma01g02880.1;Glyma01g08130.1;Glyma01g08150.1;Glyma02g04710.1;Glyma02g13420.1;Glyma02g33040.1;Glyma02g45730.1;Glyma03g02210.1;Glyma04g04640.1;Glyma04g31810.1;Glyma04g43640.1;Glyma05g03660.1;Glyma05g07350.1;Glyma05g07380.1;Glyma05g28140.1;Glyma05g2…
Vc9p318.12	UGT73C6(Vc9p318.12)	TFmatrixID_0471		1953	-	aaATTATt	Homeodomain; HD-ZIP; bZIP;HD-ZIP	AT1G69780;AT3G01220;AT3G01470;AT5G15150;Glyma01g04890.1;Glyma01g05230.1;Glyma02g02290.1;Glyma02g02630.1;Glyma05g01390.1;Glyma05g30940.1;Glyma06g20230.1;Glyma08g14130.1;Glyma08g40710.1;Glyma08g40970.1;Glyma09g37410.1;Glyma11g37920.1;Glyma13g05270.1;Glyma13g23890.1;Glyma17g10490.1;Glyma18g01830.1;Glyma18g15970.1;Glyma18g16390.1;Glyma18g49290.1;Glyma19g01300.1;Glyma19g02490.1;Os02g0729700;Os03g01706…
Vc9p318.12	UGT73C6(Vc9p318.12)	TFmatrixID_0478		755	-	GCTTT	Dof	MNB1A_MAIZE
Vc9p318.12	UGT73C6(Vc9p318.12)	TFmatrixID_0478		1205	+	AAAGC	Dof	MNB1A_MAIZE
Vc9p318.12	UGT73C6(Vc9p318.12)	TFmatrixID_0478		1760	+	AAAGC	Dof	MNB1A_MAIZE
Vc9p318.12	UGT73C6(Vc9p318.12)	TFmatrixID_0478		1763	-	GCTTT	Dof	MNB1A_MAIZE
Vc9p318.12	UGT73C6(Vc9p318.12)	TFmatrixID_0478		1840	-	GCTTT	Dof	MNB1A_MAIZE
Vc9p318.12	UGT73C6(Vc9p318.12)	TFmatrixID_0480		755	-	GCTTT	Dof	GRMZM2G146283
Vc9p318.12	UGT73C6(Vc9p318.12)	TFmatrixID_0480		1205	+	AAAGC	Dof	GRMZM2G146283
Vc9p318.12	UGT73C6(Vc9p318.12)	TFmatrixID_0480		1760	+	AAAGC	Dof	GRMZM2G146283
Vc9p318.12	UGT73C6(Vc9p318.12)	TFmatrixID_0480		1763	-	GCTTT	Dof	GRMZM2G146283
Vc9p318.12	UGT73C6(Vc9p318.12)	TFmatrixID_0480		1840	-	GCTTT	Dof	GRMZM2G146283
Vc9p318.12	UGT73C6(Vc9p318.12)	TFmatrixID_0482		427	+	ACGTCac	bZIP	POPTR_0002s03330;POPTR_0004s16560;POPTR_0005s25290;POPTR_0009s12250
Vc9p318.12	UGT73C6(Vc9p318.12)	TFmatrixID_0485		1378	+	ttatcttTTTCG	C2H2	AT1G03840;AT1G14580;AT1G55110;AT2G02070;AT2G02080;AT4G02670;AT5G03150;AT5G66730;Glyma02g16280.1;Glyma03g31390.1;Glyma03g33700.1;Glyma03g36990.1;Glyma04g03560.1;Glyma06g03630.1;Glyma07g01130.1;Glyma07g19470.1;Glyma07g19540.1;Glyma10g05880.1;Glyma10g35070.1;Glyma10g42660.1;Glyma13g20230.1;Glyma14g10940.1;Glyma15g02840.1;Glyma19g34220.1;Glyma19g36430.1;Glyma19g39640.1;Glyma20g00840.1;Glyma20g24370.1…
Vc9p318.12	UGT73C6(Vc9p318.12)	TFmatrixID_0490		426	+	gACGTCa	bZIP	AT1G08320;AT1G68640;AT5G06839;Glyma01g21020.1;Glyma03g28320.1;Glyma03g28400.1;Glyma03g29820.1;Glyma05g31620.1;Glyma06g11250.1;Glyma08g14840.1;Glyma10g12000.1;Glyma10g42280.1;Glyma10g44270.1;Glyma11g19030.1;Glyma11g36010.1;Glyma12g09430.1;Glyma12g30990.1;Glyma13g26280.1;Glyma13g33380.1;Glyma13g33480.1;Glyma13g39330.1;Glyma14g33800.1;Glyma15g37220.1;Glyma18g02430.1;Glyma19g31050.1;Glyma19g32710.1;G…
Vc9p318.12	UGT73C6(Vc9p318.12)	TFmatrixID_0508		145	-	cccacTTTTGg	MADS box; MIKC; M-type;MIKC;M-type	AT4G22950;AT4G24540;AT5G51860;AT5G60910;AT5G62165;AT1G24260;AT1G26310;AT2G45650;AT3G30260;AT3G57230;AT3G57390;AT3G61120;AT4G09960;AT4G11880;Glyma01g02880.1;Glyma01g08130.1;Glyma01g08150.1;Glyma02g13420.1;Glyma02g33040.1;Glyma02g45730.1;Glyma03g02210.1;Glyma04g31810.1;Glyma04g43640.1;Glyma05g03660.1;Glyma05g07350.1;Glyma05g07380.1;Glyma05g28130.1;Glyma05g28140.1;Glyma05g29590.1;Glyma06g22650.1;Gly…
Vc9p318.12	UGT73C6(Vc9p318.12)	TFmatrixID_0508		322	+	cCAAAAgtggg	MADS box; MIKC; M-type;MIKC;M-type	AT4G22950;AT4G24540;AT5G51860;AT5G60910;AT5G62165;AT1G24260;AT1G26310;AT2G45650;AT3G30260;AT3G57230;AT3G57390;AT3G61120;AT4G09960;AT4G11880;Glyma01g02880.1;Glyma01g08130.1;Glyma01g08150.1;Glyma02g13420.1;Glyma02g33040.1;Glyma02g45730.1;Glyma03g02210.1;Glyma04g31810.1;Glyma04g43640.1;Glyma05g03660.1;Glyma05g07350.1;Glyma05g07380.1;Glyma05g28130.1;Glyma05g28140.1;Glyma05g29590.1;Glyma06g22650.1;Gly…
Vc9p318.12	UGT73C6(Vc9p318.12)	TFmatrixID_0508		1547	+	cCAAAAgaggg	MADS box; MIKC; M-type;MIKC;M-type	AT4G22950;AT4G24540;AT5G51860;AT5G60910;AT5G62165;AT1G24260;AT1G26310;AT2G45650;AT3G30260;AT3G57230;AT3G57390;AT3G61120;AT4G09960;AT4G11880;Glyma01g02880.1;Glyma01g08130.1;Glyma01g08150.1;Glyma02g13420.1;Glyma02g33040.1;Glyma02g45730.1;Glyma03g02210.1;Glyma04g31810.1;Glyma04g43640.1;Glyma05g03660.1;Glyma05g07350.1;Glyma05g07380.1;Glyma05g28130.1;Glyma05g28140.1;Glyma05g29590.1;Glyma06g22650.1;Gly…
Vc9p318.12	UGT73C6(Vc9p318.12)	TFmatrixID_0517		1951	-	acaaaTTATTct	Homeodomain; HD-ZIP; bZIP;HD-ZIP	AT1G69780;AT3G01220;AT3G01470;AT5G15150;Glyma01g04890.1;Glyma01g05230.1;Glyma02g02290.1;Glyma02g02630.1;Glyma05g01390.1;Glyma05g30940.1;Glyma06g20230.1;Glyma08g14130.1;Glyma08g40710.1;Glyma08g40970.1;Glyma09g37410.1;Glyma11g37920.1;Glyma13g05270.1;Glyma13g23890.1;Glyma17g10490.1;Glyma18g01830.1;Glyma18g15970.1;Glyma18g16390.1;Glyma18g49290.1;Glyma19g01300.1;Glyma19g02490.1;Os02g0729700;Os03g01706…
Vc9p318.12	UGT73C6(Vc9p318.12)	TFmatrixID_0518		464	+	atgcgtaATGATctttgca	bZIP; Homeodomain; HD-ZIP;HD-ZIP	AT1G30490;AT1G52150;AT2G34710;AT4G32880;AT5G60690;Glyma05g30000.1;Glyma06g09100.1;Glyma07g01940.1;Glyma07g01950.1;Glyma08g13110.1;Glyma08g21610.1;Glyma08g21620.1;Glyma09g02750.1;Glyma11g20520.1;Glyma12g08080.1;Glyma15g13640.1;Os03g0109400;Os03g0640800;Os10g0480200;Os12g0612700;POPTR_0001s18930;POPTR_0001s38120;POPTR_0003s04860;POPTR_0004s22090;POPTR_0006s25390;POPTR_0009s01990;POPTR_0011s10070;PO…
Vc9p318.12	UGT73C6(Vc9p318.12)	TFmatrixID_0518		476	+	ctttgcaATGATttagcca	bZIP; Homeodomain; HD-ZIP;HD-ZIP	AT1G30490;AT1G52150;AT2G34710;AT4G32880;AT5G60690;Glyma05g30000.1;Glyma06g09100.1;Glyma07g01940.1;Glyma07g01950.1;Glyma08g13110.1;Glyma08g21610.1;Glyma08g21620.1;Glyma09g02750.1;Glyma11g20520.1;Glyma12g08080.1;Glyma15g13640.1;Os03g0109400;Os03g0640800;Os10g0480200;Os12g0612700;POPTR_0001s18930;POPTR_0001s38120;POPTR_0003s04860;POPTR_0004s22090;POPTR_0006s25390;POPTR_0009s01990;POPTR_0011s10070;PO…
Vc9p318.12	UGT73C6(Vc9p318.12)	TFmatrixID_0522		94	-	ctacgCGTACagaaga	SBP	AT1G69170;AT2G33810;AT2G42200;AT2G47070;AT3G57920;AT5G50570;AT5G50670;Glyma01g08060.1;Glyma01g15020.1;Glyma02g01160.1;Glyma02g13370.1;Glyma02g30670.1;Glyma03g27180.1;Glyma05g00200.1;Glyma06g36140.1;Glyma07g14610.1;Glyma07g19770.1;Glyma07g31880.1;Glyma07g36180.1;Glyma09g09790.1;Glyma10g01210.1;Glyma11g16700.1;Glyma11g36980.1;Glyma12g27330.1;Glyma12g35460.1;Glyma13g24590.1;Glyma13g31090.1;Glyma13g3…
Vc9p318.12	UGT73C6(Vc9p318.12)	TFmatrixID_0522		343	-	agatcGGTACattttc	SBP	AT1G69170;AT2G33810;AT2G42200;AT2G47070;AT3G57920;AT5G50570;AT5G50670;Glyma01g08060.1;Glyma01g15020.1;Glyma02g01160.1;Glyma02g13370.1;Glyma02g30670.1;Glyma03g27180.1;Glyma05g00200.1;Glyma06g36140.1;Glyma07g14610.1;Glyma07g19770.1;Glyma07g31880.1;Glyma07g36180.1;Glyma09g09790.1;Glyma10g01210.1;Glyma11g16700.1;Glyma11g36980.1;Glyma12g27330.1;Glyma12g35460.1;Glyma13g24590.1;Glyma13g31090.1;Glyma13g3…
Vc9p318.12	UGT73C6(Vc9p318.12)	TFmatrixID_0522		1748	+	ggatcgGTACGtaaag	SBP	AT1G69170;AT2G33810;AT2G42200;AT2G47070;AT3G57920;AT5G50570;AT5G50670;Glyma01g08060.1;Glyma01g15020.1;Glyma02g01160.1;Glyma02g13370.1;Glyma02g30670.1;Glyma03g27180.1;Glyma05g00200.1;Glyma06g36140.1;Glyma07g14610.1;Glyma07g19770.1;Glyma07g31880.1;Glyma07g36180.1;Glyma09g09790.1;Glyma10g01210.1;Glyma11g16700.1;Glyma11g36980.1;Glyma12g27330.1;Glyma12g35460.1;Glyma13g24590.1;Glyma13g31090.1;Glyma13g3…
Vc9p318.12	UGT73C6(Vc9p318.12)	TFmatrixID_0523		767	-	tctttTGTACtattat	SBP	AT1G02065;AT1G27370;AT1G69170;AT2G42200;AT2G47070;AT3G57920;AT5G43270;Glyma01g08060.1;Glyma01g15020.1;Glyma02g01160.1;Glyma02g13370.1;Glyma02g30670.1;Glyma03g27180.1;Glyma03g29900.1;Glyma04g37390.1;Glyma05g00200.1;Glyma05g38180.1;Glyma06g17700.1;Glyma06g22450.1;Glyma06g36140.1;Glyma07g14610.1;Glyma07g19770.1;Glyma07g31880.1;Glyma07g36180.1;Glyma08g01450.1;Glyma09g09790.1;Glyma10g01210.1;Glyma11g1…
Vc9p318.12	UGT73C6(Vc9p318.12)	TFmatrixID_0527		1816	-	acgCAACAaaaa	AP2; B3; RAV;ERF;RAV	AT1G13260;Glyma01g22260.1;Glyma02g11060.1;Glyma10g34760.1;Glyma20g32730.1;Os01g0140700;Os01g0141000;Os01g0693400;POPTR_0008s11600;POPTR_0010s13930;Sb03g031860;Sb09g027530;GRMZM2G059939;GRMZM2G159592;GRMZM2G169654
Vc9p318.12	UGT73C6(Vc9p318.12)	TFmatrixID_0533		425	+	cgaCGTCAcaa	bZIP	AT1G08320;AT1G68640;AT5G06839;AT5G65210;Glyma01g21020.1;Glyma03g28320.1;Glyma03g28400.1;Glyma03g29820.1;Glyma05g31620.1;Glyma06g11250.1;Glyma08g14840.1;Glyma10g12000.1;Glyma10g42280.1;Glyma10g44270.1;Glyma11g19030.1;Glyma11g36010.1;Glyma12g09430.1;Glyma12g30990.1;Glyma13g26280.1;Glyma13g33380.1;Glyma13g33480.1;Glyma13g39330.1;Glyma14g33800.1;Glyma15g37220.1;Glyma18g02430.1;Glyma19g31050.1;Glyma19…
Vc9p318.12	UGT73C6(Vc9p318.12)	TFmatrixID_0533		1811	-	gcaTGACGcaa	bZIP	AT1G08320;AT1G68640;AT5G06839;AT5G65210;Glyma01g21020.1;Glyma03g28320.1;Glyma03g28400.1;Glyma03g29820.1;Glyma05g31620.1;Glyma06g11250.1;Glyma08g14840.1;Glyma10g12000.1;Glyma10g42280.1;Glyma10g44270.1;Glyma11g19030.1;Glyma11g36010.1;Glyma12g09430.1;Glyma12g30990.1;Glyma13g26280.1;Glyma13g33380.1;Glyma13g33480.1;Glyma13g39330.1;Glyma14g33800.1;Glyma15g37220.1;Glyma18g02430.1;Glyma19g31050.1;Glyma19…
Vc9p318.12	UGT73C6(Vc9p318.12)	TFmatrixID_0536		1543	+	aataCCAAAagaggggca	MADS box; MIKC; M-type;MIKC;M-type	AT4G18960;AT4G22950;AT5G51870;AT5G60910;AT5G62165;AT1G22130;AT1G26310;AT1G77980;AT2G45650;AT3G30260;AT3G57230;AT3G57390;AT3G61120;AT4G09960;AT4G11880;Glyma01g02880.1;Glyma01g08130.1;Glyma01g08150.1;Glyma02g04710.1;Glyma02g13420.1;Glyma02g33040.1;Glyma02g45730.1;Glyma03g02210.1;Glyma04g04640.1;Glyma04g31810.1;Glyma04g43640.1;Glyma05g03660.1;Glyma05g07350.1;Glyma05g07380.1;Glyma05g28140.1;Glyma05g2…
Vc9p318.12	UGT73C6(Vc9p318.12)	TFmatrixID_0540		1950	-	aacaaaTTATTctt	Homeodomain; HD-ZIP; bZIP;HD-ZIP	AT1G69780;AT3G01220;AT3G01470;AT5G15150;Glyma01g04890.1;Glyma01g05230.1;Glyma02g02290.1;Glyma02g02630.1;Glyma05g01390.1;Glyma05g30940.1;Glyma06g20230.1;Glyma08g14130.1;Glyma08g40710.1;Glyma08g40970.1;Glyma09g37410.1;Glyma11g37920.1;Glyma13g05270.1;Glyma13g23890.1;Glyma17g10490.1;Glyma18g01830.1;Glyma18g15970.1;Glyma18g16390.1;Glyma18g49290.1;Glyma19g01300.1;Glyma19g02490.1;Os02g0729700;Os03g01706…
Vc9p318.12	UGT73C6(Vc9p318.12)	TFmatrixID_0542		464	+	atgcgtaATGATctttgca	bZIP; Homeodomain; HD-ZIP;HD-ZIP	AT1G30490;AT1G52150;AT2G34710;AT4G32880;AT5G60690;Glyma05g30000.1;Glyma06g09100.1;Glyma07g01940.1;Glyma07g01950.1;Glyma08g13110.1;Glyma08g21610.1;Glyma08g21620.1;Glyma09g02750.1;Glyma11g20520.1;Glyma12g08080.1;Glyma15g13640.1;Os03g0109400;Os03g0640800;Os10g0480200;Os12g0612700;POPTR_0001s18930;POPTR_0001s38120;POPTR_0003s04860;POPTR_0004s22090;POPTR_0006s25390;POPTR_0009s01990;POPTR_0011s10070;PO…
Vc9p318.12	UGT73C6(Vc9p318.12)	TFmatrixID_0542		476	+	ctttgcaATGATttagcca	bZIP; Homeodomain; HD-ZIP;HD-ZIP	AT1G30490;AT1G52150;AT2G34710;AT4G32880;AT5G60690;Glyma05g30000.1;Glyma06g09100.1;Glyma07g01940.1;Glyma07g01950.1;Glyma08g13110.1;Glyma08g21610.1;Glyma08g21620.1;Glyma09g02750.1;Glyma11g20520.1;Glyma12g08080.1;Glyma15g13640.1;Os03g0109400;Os03g0640800;Os10g0480200;Os12g0612700;POPTR_0001s18930;POPTR_0001s38120;POPTR_0003s04860;POPTR_0004s22090;POPTR_0006s25390;POPTR_0009s01990;POPTR_0011s10070;PO…
Vc9p318.12	UGT73C6(Vc9p318.12)	TFmatrixID_0544		427	+	ACGTCacaacac	bZIP	POPTR_0002s03330;POPTR_0004s16560;POPTR_0005s25290;POPTR_0009s12250
Vc9p318.12	UGT73C6(Vc9p318.12)	TFmatrixID_0548		1756	+	acgTAAAGctt	Dof	MNB1A_MAIZE
Vc9p318.12	UGT73C6(Vc9p318.12)	TFmatrixID_0549		753	-	tgGCTTTataa	Dof	GRMZM2G009406
Vc9p318.12	UGT73C6(Vc9p318.12)	TFmatrixID_0549		1756	+	acgtAAAGCtt	Dof	GRMZM2G009406
Vc9p318.12	UGT73C6(Vc9p318.12)	TFmatrixID_0549		1761	-	aaGCTTTattg	Dof	GRMZM2G009406
Vc9p318.12	UGT73C6(Vc9p318.12)	TFmatrixID_0549		1838	-	aaGCTTTaaaa	Dof	GRMZM2G009406
Vc9p318.12	UGT73C6(Vc9p318.12)	TFmatrixID_0557		228	-	acaCTTTTaaa	Dof	GRMZM2G146283
Vc9p318.12	UGT73C6(Vc9p318.12)	TFmatrixID_0557		389	-	tccCTTTTgaa	Dof	GRMZM2G146283
Vc9p318.12	UGT73C6(Vc9p318.12)	TFmatrixID_0557		1281	-	tctCTTTTtta	Dof	GRMZM2G146283
Vc9p318.12	UGT73C6(Vc9p318.12)	TFmatrixID_0560		1816	-	acgCAACAaaaa	AP2; B3; RAV;ERF;RAV	AT1G13260;Glyma01g22260.1;Glyma02g11060.1;Glyma10g34760.1;Glyma20g32730.1;Os01g0140700;Os01g0141000;Os01g0693400;POPTR_0008s11600;POPTR_0010s13930;Sb03g031860;Sb09g027530;GRMZM2G059939;GRMZM2G159592;GRMZM2G169654
Vc9p318.12	UGT73C6(Vc9p318.12)	TFmatrixID_0569		758	+	ttATAAAattctttt	TBP	AT1G55520;AT3G13445;Glyma03g04500.1;Glyma09g41330.1;Glyma16g25450.1;Glyma18g44460.1;Glyma19g28780.1;Os10g0432300;Os12g0580300;POPTR_0013s05580;POPTR_0019s04890;Sb01g012880;Sb01g017130;Sb01g021297;Sb08g022273;GRMZM2G149238;GRMZM2G161418
Vc9p318.12	UGT73C6(Vc9p318.12)	TFmatrixID_0569		783	-	cagtgataTTTATag	TBP	AT1G55520;AT3G13445;Glyma03g04500.1;Glyma09g41330.1;Glyma16g25450.1;Glyma18g44460.1;Glyma19g28780.1;Os10g0432300;Os12g0580300;POPTR_0013s05580;POPTR_0019s04890;Sb01g012880;Sb01g017130;Sb01g021297;Sb08g022273;GRMZM2G149238;GRMZM2G161418
Vc9p318.12	UGT73C6(Vc9p318.12)	TFmatrixID_0569		1439	-	aaatttctTTTATaa	TBP	AT1G55520;AT3G13445;Glyma03g04500.1;Glyma09g41330.1;Glyma16g25450.1;Glyma18g44460.1;Glyma19g28780.1;Os10g0432300;Os12g0580300;POPTR_0013s05580;POPTR_0019s04890;Sb01g012880;Sb01g017130;Sb01g021297;Sb08g022273;GRMZM2G149238;GRMZM2G161418
Vc9p318.12	UGT73C6(Vc9p318.12)	TFmatrixID_0570		231	-	cTTTTAaagg	TBP	AT1G55520;AT3G13445;Glyma03g04500.1;Glyma09g41330.1;Glyma16g25450.1;Glyma18g44460.1;Glyma19g28780.1;Os10g0432300;Os12g0580300;POPTR_0013s05580;POPTR_0019s04890;Sb01g012880;Sb01g017130;Sb01g021297;Sb08g022273;GRMZM2G149238;GRMZM2G161418
Vc9p318.12	UGT73C6(Vc9p318.12)	TFmatrixID_0570		596	-	gTTTTAaagt	TBP	AT1G55520;AT3G13445;Glyma03g04500.1;Glyma09g41330.1;Glyma16g25450.1;Glyma18g44460.1;Glyma19g28780.1;Os10g0432300;Os12g0580300;POPTR_0013s05580;POPTR_0019s04890;Sb01g012880;Sb01g017130;Sb01g021297;Sb08g022273;GRMZM2G149238;GRMZM2G161418
Vc9p318.12	UGT73C6(Vc9p318.12)	TFmatrixID_0570		757	+	tttaTAAAAt	TBP	AT1G55520;AT3G13445;Glyma03g04500.1;Glyma09g41330.1;Glyma16g25450.1;Glyma18g44460.1;Glyma19g28780.1;Os10g0432300;Os12g0580300;POPTR_0013s05580;POPTR_0019s04890;Sb01g012880;Sb01g017130;Sb01g021297;Sb08g022273;GRMZM2G149238;GRMZM2G161418
Vc9p318.12	UGT73C6(Vc9p318.12)	TFmatrixID_0570		1445	-	cTTTTAtaat	TBP	AT1G55520;AT3G13445;Glyma03g04500.1;Glyma09g41330.1;Glyma16g25450.1;Glyma18g44460.1;Glyma19g28780.1;Os10g0432300;Os12g0580300;POPTR_0013s05580;POPTR_0019s04890;Sb01g012880;Sb01g017130;Sb01g021297;Sb08g022273;GRMZM2G149238;GRMZM2G161418
Vc9p318.12	UGT73C6(Vc9p318.12)	TFmatrixID_0570		1840	+	gcttTAAAAa	TBP	AT1G55520;AT3G13445;Glyma03g04500.1;Glyma09g41330.1;Glyma16g25450.1;Glyma18g44460.1;Glyma19g28780.1;Os10g0432300;Os12g0580300;POPTR_0013s05580;POPTR_0019s04890;Sb01g012880;Sb01g017130;Sb01g021297;Sb08g022273;GRMZM2G149238;GRMZM2G161418
Vc9p318.12	UGT73C6(Vc9p318.12)	TFmatrixID_0571		789	-	taTTTATa	TBP	AT1G55520;AT3G13445;Glyma03g04500.1;Glyma09g41330.1;Glyma16g25450.1;Glyma18g44460.1;Glyma19g28780.1;Os10g0432300;Os12g0580300;POPTR_0013s05580;POPTR_0019s04890;Sb01g012880;Sb01g017130;Sb01g021297;Sb08g022273;GRMZM2G149238;GRMZM2G161418
Vc9p318.12	UGT73C6(Vc9p318.12)	TFmatrixID_0571		1587	-	taTTTATg	TBP	AT1G55520;AT3G13445;Glyma03g04500.1;Glyma09g41330.1;Glyma16g25450.1;Glyma18g44460.1;Glyma19g28780.1;Os10g0432300;Os12g0580300;POPTR_0013s05580;POPTR_0019s04890;Sb01g012880;Sb01g017130;Sb01g021297;Sb08g022273;GRMZM2G149238;GRMZM2G161418
Vc9p318.12	UGT73C6(Vc9p318.12)	TFmatrixID_0580		120	+	aAAATAt	AT-Hook	Os01g0835600;Sb0621s002020;GRMZM2G008456;GRMZM2G127034
Vc9p318.12	UGT73C6(Vc9p318.12)	TFmatrixID_0580		516	+	aAAATAt	AT-Hook	Os01g0835600;Sb0621s002020;GRMZM2G008456;GRMZM2G127034
Vc9p318.12	UGT73C6(Vc9p318.12)	TFmatrixID_0580		803	+	aAAATAt	AT-Hook	Os01g0835600;Sb0621s002020;GRMZM2G008456;GRMZM2G127034
Vc9p318.12	UGT73C6(Vc9p318.12)	TFmatrixID_0580		1235	+	aAAATAt	AT-Hook	Os01g0835600;Sb0621s002020;GRMZM2G008456;GRMZM2G127034
Vc9p318.12	UGT73C6(Vc9p318.12)	TFmatrixID_0580		1342	+	aAAATAt	AT-Hook	Os01g0835600;Sb0621s002020;GRMZM2G008456;GRMZM2G127034
Vc9p318.12	UGT73C6(Vc9p318.12)	TFmatrixID_0581		1227	+	aatttctgaaAATAT	AT-Hook	Os01g0835600;Sb0621s002020;GRMZM2G008456;GRMZM2G127034
Vc9p318.12	UGT73C6(Vc9p318.12)	TFmatrixID_0585		788	-	ataTTTATagc	TBP	AT1G55520;AT3G13445;Glyma03g04500.1;Glyma09g41330.1;Glyma16g25450.1;Glyma18g44460.1;Glyma19g28780.1;Os10g0432300;Os12g0580300;POPTR_0013s05580;POPTR_0019s04890;Sb01g012880;Sb01g017130;Sb01g021297;Sb08g022273;GRMZM2G149238;GRMZM2G161418
Vc9p318.12	UGT73C6(Vc9p318.12)	TFmatrixID_0585		1444	-	tctTTTATaat	TBP	AT1G55520;AT3G13445;Glyma03g04500.1;Glyma09g41330.1;Glyma16g25450.1;Glyma18g44460.1;Glyma19g28780.1;Os10g0432300;Os12g0580300;POPTR_0013s05580;POPTR_0019s04890;Sb01g012880;Sb01g017130;Sb01g021297;Sb08g022273;GRMZM2G149238;GRMZM2G161418
Vc9p318.12	UGT73C6(Vc9p318.12)	TFmatrixID_0590		176	-	aCCGTTcatt	MYB	AT1G17950
Vc9p318.12	UGT73C6(Vc9p318.12)	TFmatrixID_0590		292	+	aatgAACGGt	MYB	AT1G17950
Vc9p318.12	UGT73C6(Vc9p318.12)	TFmatrixID_0591		1517	-	ctaaCTAACt	MYB	AT1G17950
Vc9p318.12	UGT73C6(Vc9p318.12)	TFmatrixID_0600		448	+	aCGCCGacac	AP2; ERF	AT3G16770
Vc9p318.12	UGT73C6(Vc9p318.12)	TFmatrixID_0605		222	-	gttTACACac	B3	AT4G31610
Vc9p318.12	UGT73C6(Vc9p318.12)	TFmatrixID_0609		785	-	gtGATATtta	MYB-related	AT5G17300
Vc9p318.12	UGT73C6(Vc9p318.12)	TFmatrixID_0609		1273	+	ttaATATCtc	MYB-related	AT5G17300
Vc9p318.12	UGT73C6(Vc9p318.12)	TFmatrixID_0609		1342	+	aaaATATCca	MYB-related	AT5G17300
Vc9p318.12	UGT73C6(Vc9p318.12)	TFmatrixID_0610		1274	+	taATATCtct	MYB-related	AT5G17300
Vc9p318.12	UGT73C6(Vc9p318.12)	TFmatrixID_0610		1343	+	aaATATCcaa	MYB-related	AT5G17300
Vc9p318.12	UGT73C6(Vc9p318.12)	TFmatrixID_0611		97	+	cgCGTACaga	SBP	AT2G47070
Vc9p318.12	UGT73C6(Vc9p318.12)	TFmatrixID_0611		1751	-	tcgGTACGta	SBP	AT2G47070
Vc9p318.12	UGT73C6(Vc9p318.12)	TFmatrixID_0614		377	+	ccCCTAGtcg	SRS	AT3G51060
Vc9p318.12	UGT73C6(Vc9p318.12)	TFmatrixID_0614		1656	+	taCCTAGgaa	SRS	AT3G51060
Vc9p318.12	UGT73C6(Vc9p318.12)	TFmatrixID_0614		1656	-	tacCTAGGaa	SRS	AT3G51060
Vc9p318.12	UGT73C6(Vc9p318.12)	TFmatrixID_0616		141	+	gggaCCCACt	TCP	AT1G69690
Vc9p318.12	UGT73C6(Vc9p318.12)	TFmatrixID_0616		154	+	gggtCCCACa	TCP	AT1G69690
Vc9p318.12	UGT73C6(Vc9p318.12)	TFmatrixID_0616		327	-	aGTGGGtccc	TCP	AT1G69690
Vc9p318.12	UGT73C6(Vc9p318.12)	TFmatrixID_0617		139	-	gggGGACCca	TCP	AT3G45150
Vc9p318.12	UGT73C6(Vc9p318.12)	TFmatrixID_0617		329	+	tgGGTCCccc	TCP	AT3G45150
Vc9p318.12	UGT73C6(Vc9p318.12)	TFmatrixID_0618		141	+	gggaCCCACt	TCP	AT1G35560
Vc9p318.12	UGT73C6(Vc9p318.12)	TFmatrixID_0618		154	+	gggtCCCACa	TCP	AT1G35560
Vc9p318.12	UGT73C6(Vc9p318.12)	TFmatrixID_0618		327	-	aGTGGGtccc	TCP	AT1G35560
Vc9p318.12	UGT73C6(Vc9p318.12)	TFmatrixID_0619		424	+	ccGACGTcac	bZIP	AT5G06950
Vc9p318.12	UGT73C6(Vc9p318.12)	TFmatrixID_0619		424	-	ccgACGTCac	bZIP	AT5G06950
Vc9p318.12	UGT73C6(Vc9p318.12)	TFmatrixID_0620		426	+	gaCGTCAcaa	bZIP	AT5G06950
Vc9p318.12	UGT73C6(Vc9p318.12)	TFmatrixID_0627		199	-	ttGATTGaaa	Homeodomain; bZIP; HD-ZIP; WOX	AT4G35550
Vc9p318.12	UGT73C6(Vc9p318.12)	TFmatrixID_0629		70	+	aagTTGACtt	WRKY	AT2G44745
Vc9p318.12	UGT73C6(Vc9p318.12)	TFmatrixID_0629		1387	+	tcgTTGACaa	WRKY	AT2G44745
Vc9p318.12	UGT73C6(Vc9p318.12)	TFmatrixID_0631		70	+	aagTTGACtt	WRKY	AT5G22570
Vc9p318.12	UGT73C6(Vc9p318.12)	TFmatrixID_0631		1387	+	tcgTTGACaa	WRKY	AT5G22570
Vc9p318.12	UGT73C6(Vc9p318.12)	TFmatrixID_0632		70	+	aagTTGACtt	WRKY	AT3G01970
Vc9p318.12	UGT73C6(Vc9p318.12)	TFmatrixID_0632		1387	+	tcgTTGACaa	WRKY	AT3G01970
Vc9p318.12	UGT73C6(Vc9p318.12)	TFmatrixID_0634		1306	+	tgATGATtat	Sox; YABBY	AT2G26580
Vc9p318.12	UGT73C6(Vc9p318.12)	TFmatrixID_0637		1489	+	ataaCACTAa	C2H2	AT5G04340
Vc9p318.12	UGT73C6(Vc9p318.12)	TFmatrixID_0638		1280	-	ctcTCTTTtt	Dof	AT5G65590
Vc9p318.12	UGT73C6(Vc9p318.12)	TFmatrixID_0638		1378	-	ttaTCTTTtt	Dof	AT5G65590
Vc9p318.12	UGT73C6(Vc9p318.12)	TFmatrixID_0638		1548	+	caAAAGAggg	Dof	AT5G65590
Vc9p318.12	UGT73C6(Vc9p318.12)	TF_motif_seq_0010		760	-	ataaaATTCT	HSF	AT3G24520;AT1G32330;AT1G46264;AT1G67970;AT2G26150;AT2G41690;AT3G02990;AT3G22830;AT3G51910;AT3G63350;AT4G11660;AT4G13980;AT4G17750;AT4G18880;AT5G03720;AT5G16820;AT5G43840;AT5G45710;AT5G54070;AT5G62020
Vc9p318.12	UGT73C6(Vc9p318.12)	TF_motif_seq_0014		1105	+	ATGACttgtt	bZIP	AT5G06950
Vc9p318.12	UGT73C6(Vc9p318.12)	TF_motif_seq_0014		1648	+	ATGACttcta	bZIP	AT5G06950
Vc9p318.12	UGT73C6(Vc9p318.12)	TF_motif_seq_0014		1813	+	ATGACgcaac	bZIP	AT5G06950
Vc9p318.12	UGT73C6(Vc9p318.12)	TF_motif_seq_0046		33	-	gcaaaGTGGA	(Others)	M86591
Vc9p318.12	UGT73C6(Vc9p318.12)	TF_motif_seq_0046		500	-	cctgcGTGGA	(Others)	M86591
Vc9p318.12	UGT73C6(Vc9p318.12)	TF_motif_seq_0051		33	-	gcaaaGTGGA	(Others)	L01447;L01448;L01449
Vc9p318.12	UGT73C6(Vc9p318.12)	TF_motif_seq_0067		933	+	CTAATtctgaa	HB-PHD	AT4G29940
Vc9p318.12	UGT73C6(Vc9p318.12)	TF_motif_seq_0080		990	+	TAAGAgctggg	AP2; ERF	AT3G16770
Vc9p318.12	UGT73C6(Vc9p318.12)	TF_motif_seq_0088		876	+	TGCTGcagtta	bZIP	AT4G02640
Vc9p318.12	UGT73C6(Vc9p318.12)	TF_motif_seq_0105		391	+	CCTTTtgaatgg	MADS box; MIKC	AT5G13790
Vc9p318.12	UGT73C6(Vc9p318.12)	TF_motif_seq_0105		391	-	ccttttgAATGG	MADS box; MIKC	AT5G13790
Vc9p318.12	UGT73C6(Vc9p318.12)	TF_motif_seq_0113		1138	-	aacgtttGTTTA	PsaH	X51911
Vc9p318.12	UGT73C6(Vc9p318.12)	TF_motif_seq_0146		67	+	CCAAAgttgactttt	C2H2	AT1G30970
Vc9p318.12	UGT73C6(Vc9p318.12)	TF_motif_seq_0146		741	-	aaatatttaaTTTGG	C2H2	AT1G30970
Vc9p318.12	UGT73C6(Vc9p318.12)	TF_motif_seq_0146		1349	+	CCAAAtttaattctt	C2H2	AT1G30970
Vc9p318.12	UGT73C6(Vc9p318.12)	TF_motif_seq_0151		1933	-	ccgcccggtgAACGC	VOZ	AT2G42400
Vc9p318.12	UGT73C6(Vc9p318.12)	TF_motif_seq_0151		1966	+	GCGTTtcactaaaac	VOZ	AT2G42400
Vc9p318.12	UGT73C6(Vc9p318.12)	TF_motif_seq_0151		1968	-	gtttcactaaAACGC	VOZ	AT2G42400
Vc9p318.12	UGT73C6(Vc9p318.12)	TF_motif_seq_0169		1415	+	TTTCTattccttgtaa	(Others)	U81368;U81369;U81370
Vc9p318.12	UGT73C6(Vc9p318.12)	TF_motif_seq_0175		1345	+	ATATCcaaatttaattct	(Others)	X52153
Vc9p318.12	UGT73C6(Vc9p318.12)	TF_motif_seq_0237		40	+	GGATA	GATA; tify	AT1G51600;AT2G45050;AT3G06740;AT3G16870;AT3G21175;AT3G24050;AT3G54810;AT3G60530;AT4G17570;AT4G24470;AT4G26150;AT4G32890;AT4G34680;AT5G25830;AT5G26930;AT5G56860;AT5G66320;AT2G18380;AT3G50870;AT4G36620
Vc9p318.12	UGT73C6(Vc9p318.12)	TF_motif_seq_0237		90	-	AATCC	GATA; tify	AT1G51600;AT2G45050;AT3G06740;AT3G16870;AT3G21175;AT3G24050;AT3G54810;AT3G60530;AT4G17570;AT4G24470;AT4G26150;AT4G32890;AT4G34680;AT5G25830;AT5G26930;AT5G56860;AT5G66320;AT2G18380;AT3G50870;AT4G36620
Vc9p318.12	UGT73C6(Vc9p318.12)	TF_motif_seq_0237		107	+	AGATT	GATA; tify	AT1G51600;AT2G45050;AT3G06740;AT3G16870;AT3G21175;AT3G24050;AT3G54810;AT3G60530;AT4G17570;AT4G24470;AT4G26150;AT4G32890;AT4G34680;AT5G25830;AT5G26930;AT5G56860;AT5G66320;AT2G18380;AT3G50870;AT4G36620
Vc9p318.12	UGT73C6(Vc9p318.12)	TF_motif_seq_0237		129	+	CGATT	GATA; tify	AT1G51600;AT2G45050;AT3G06740;AT3G16870;AT3G21175;AT3G24050;AT3G54810;AT3G60530;AT4G17570;AT4G24470;AT4G26150;AT4G32890;AT4G34680;AT5G25830;AT5G26930;AT5G56860;AT5G66320;AT2G18380;AT3G50870;AT4G36620
Vc9p318.12	UGT73C6(Vc9p318.12)	TF_motif_seq_0237		168	+	CGATA	GATA; tify	AT1G51600;AT2G45050;AT3G06740;AT3G16870;AT3G21175;AT3G24050;AT3G54810;AT3G60530;AT4G17570;AT4G24470;AT4G26150;AT4G32890;AT4G34680;AT5G25830;AT5G26930;AT5G56860;AT5G66320;AT2G18380;AT3G50870;AT4G36620
Vc9p318.12	UGT73C6(Vc9p318.12)	TF_motif_seq_0237		200	+	TGATT	GATA; tify	AT1G51600;AT2G45050;AT3G06740;AT3G16870;AT3G21175;AT3G24050;AT3G54810;AT3G60530;AT4G17570;AT4G24470;AT4G26150;AT4G32890;AT4G34680;AT5G25830;AT5G26930;AT5G56860;AT5G66320;AT2G18380;AT3G50870;AT4G36620
Vc9p318.12	UGT73C6(Vc9p318.12)	TF_motif_seq_0237		304	+	GGATC	GATA; tify	AT1G51600;AT2G45050;AT3G06740;AT3G16870;AT3G21175;AT3G24050;AT3G54810;AT3G60530;AT4G17570;AT4G24470;AT4G26150;AT4G32890;AT4G34680;AT5G25830;AT5G26930;AT5G56860;AT5G66320;AT2G18380;AT3G50870;AT4G36620
Vc9p318.12	UGT73C6(Vc9p318.12)	TF_motif_seq_0237		305	-	GATCG	GATA; tify	AT1G51600;AT2G45050;AT3G06740;AT3G16870;AT3G21175;AT3G24050;AT3G54810;AT3G60530;AT4G17570;AT4G24470;AT4G26150;AT4G32890;AT4G34680;AT5G25830;AT5G26930;AT5G56860;AT5G66320;AT2G18380;AT3G50870;AT4G36620
Vc9p318.12	UGT73C6(Vc9p318.12)	TF_motif_seq_0237		343	+	AGATC	GATA; tify	AT1G51600;AT2G45050;AT3G06740;AT3G16870;AT3G21175;AT3G24050;AT3G54810;AT3G60530;AT4G17570;AT4G24470;AT4G26150;AT4G32890;AT4G34680;AT5G25830;AT5G26930;AT5G56860;AT5G66320;AT2G18380;AT3G50870;AT4G36620
Vc9p318.12	UGT73C6(Vc9p318.12)	TF_motif_seq_0237		344	-	GATCG	GATA; tify	AT1G51600;AT2G45050;AT3G06740;AT3G16870;AT3G21175;AT3G24050;AT3G54810;AT3G60530;AT4G17570;AT4G24470;AT4G26150;AT4G32890;AT4G34680;AT5G25830;AT5G26930;AT5G56860;AT5G66320;AT2G18380;AT3G50870;AT4G36620
Vc9p318.12	UGT73C6(Vc9p318.12)	TF_motif_seq_0237		366	-	AATCT	GATA; tify	AT1G51600;AT2G45050;AT3G06740;AT3G16870;AT3G21175;AT3G24050;AT3G54810;AT3G60530;AT4G17570;AT4G24470;AT4G26150;AT4G32890;AT4G34680;AT5G25830;AT5G26930;AT5G56860;AT5G66320;AT2G18380;AT3G50870;AT4G36620
Vc9p318.12	UGT73C6(Vc9p318.12)	TF_motif_seq_0237		472	+	TGATC	GATA; tify	AT1G51600;AT2G45050;AT3G06740;AT3G16870;AT3G21175;AT3G24050;AT3G54810;AT3G60530;AT4G17570;AT4G24470;AT4G26150;AT4G32890;AT4G34680;AT5G25830;AT5G26930;AT5G56860;AT5G66320;AT2G18380;AT3G50870;AT4G36620
Vc9p318.12	UGT73C6(Vc9p318.12)	TF_motif_seq_0237		473	-	GATCT	GATA; tify	AT1G51600;AT2G45050;AT3G06740;AT3G16870;AT3G21175;AT3G24050;AT3G54810;AT3G60530;AT4G17570;AT4G24470;AT4G26150;AT4G32890;AT4G34680;AT5G25830;AT5G26930;AT5G56860;AT5G66320;AT2G18380;AT3G50870;AT4G36620
Vc9p318.12	UGT73C6(Vc9p318.12)	TF_motif_seq_0237		484	+	TGATT	GATA; tify	AT1G51600;AT2G45050;AT3G06740;AT3G16870;AT3G21175;AT3G24050;AT3G54810;AT3G60530;AT4G17570;AT4G24470;AT4G26150;AT4G32890;AT4G34680;AT5G25830;AT5G26930;AT5G56860;AT5G66320;AT2G18380;AT3G50870;AT4G36620
Vc9p318.12	UGT73C6(Vc9p318.12)	TF_motif_seq_0237		496	+	TGATC	GATA; tify	AT1G51600;AT2G45050;AT3G06740;AT3G16870;AT3G21175;AT3G24050;AT3G54810;AT3G60530;AT4G17570;AT4G24470;AT4G26150;AT4G32890;AT4G34680;AT5G25830;AT5G26930;AT5G56860;AT5G66320;AT2G18380;AT3G50870;AT4G36620
Vc9p318.12	UGT73C6(Vc9p318.12)	TF_motif_seq_0237		497	-	GATCC	GATA; tify	AT1G51600;AT2G45050;AT3G06740;AT3G16870;AT3G21175;AT3G24050;AT3G54810;AT3G60530;AT4G17570;AT4G24470;AT4G26150;AT4G32890;AT4G34680;AT5G25830;AT5G26930;AT5G56860;AT5G66320;AT2G18380;AT3G50870;AT4G36620
Vc9p318.12	UGT73C6(Vc9p318.12)	TF_motif_seq_0237		523	-	TATCA	GATA; tify	AT1G51600;AT2G45050;AT3G06740;AT3G16870;AT3G21175;AT3G24050;AT3G54810;AT3G60530;AT4G17570;AT4G24470;AT4G26150;AT4G32890;AT4G34680;AT5G25830;AT5G26930;AT5G56860;AT5G66320;AT2G18380;AT3G50870;AT4G36620
Vc9p318.12	UGT73C6(Vc9p318.12)	TF_motif_seq_0237		535	+	AGATG	GATA; tify	AT1G51600;AT2G45050;AT3G06740;AT3G16870;AT3G21175;AT3G24050;AT3G54810;AT3G60530;AT4G17570;AT4G24470;AT4G26150;AT4G32890;AT4G34680;AT5G25830;AT5G26930;AT5G56860;AT5G66320;AT2G18380;AT3G50870;AT4G36620
Vc9p318.12	UGT73C6(Vc9p318.12)	TF_motif_seq_0237		538	+	TGATA	GATA; tify	AT1G51600;AT2G45050;AT3G06740;AT3G16870;AT3G21175;AT3G24050;AT3G54810;AT3G60530;AT4G17570;AT4G24470;AT4G26150;AT4G32890;AT4G34680;AT5G25830;AT5G26930;AT5G56860;AT5G66320;AT2G18380;AT3G50870;AT4G36620
Vc9p318.12	UGT73C6(Vc9p318.12)	TF_motif_seq_0237		590	-	CATCT	GATA; tify	AT1G51600;AT2G45050;AT3G06740;AT3G16870;AT3G21175;AT3G24050;AT3G54810;AT3G60530;AT4G17570;AT4G24470;AT4G26150;AT4G32890;AT4G34680;AT5G25830;AT5G26930;AT5G56860;AT5G66320;AT2G18380;AT3G50870;AT4G36620
Vc9p318.12	UGT73C6(Vc9p318.12)	TF_motif_seq_0237		617	-	TATCG	GATA; tify	AT1G51600;AT2G45050;AT3G06740;AT3G16870;AT3G21175;AT3G24050;AT3G54810;AT3G60530;AT4G17570;AT4G24470;AT4G26150;AT4G32890;AT4G34680;AT5G25830;AT5G26930;AT5G56860;AT5G66320;AT2G18380;AT3G50870;AT4G36620
Vc9p318.12	UGT73C6(Vc9p318.12)	TF_motif_seq_0237		623	+	AGATT	GATA; tify	AT1G51600;AT2G45050;AT3G06740;AT3G16870;AT3G21175;AT3G24050;AT3G54810;AT3G60530;AT4G17570;AT4G24470;AT4G26150;AT4G32890;AT4G34680;AT5G25830;AT5G26930;AT5G56860;AT5G66320;AT2G18380;AT3G50870;AT4G36620
Vc9p318.12	UGT73C6(Vc9p318.12)	TF_motif_seq_0237		645	-	TATCT	GATA; tify	AT1G51600;AT2G45050;AT3G06740;AT3G16870;AT3G21175;AT3G24050;AT3G54810;AT3G60530;AT4G17570;AT4G24470;AT4G26150;AT4G32890;AT4G34680;AT5G25830;AT5G26930;AT5G56860;AT5G66320;AT2G18380;AT3G50870;AT4G36620
Vc9p318.12	UGT73C6(Vc9p318.12)	TF_motif_seq_0237		661	-	AATCT	GATA; tify	AT1G51600;AT2G45050;AT3G06740;AT3G16870;AT3G21175;AT3G24050;AT3G54810;AT3G60530;AT4G17570;AT4G24470;AT4G26150;AT4G32890;AT4G34680;AT5G25830;AT5G26930;AT5G56860;AT5G66320;AT2G18380;AT3G50870;AT4G36620
Vc9p318.12	UGT73C6(Vc9p318.12)	TF_motif_seq_0237		691	-	AATCT	GATA; tify	AT1G51600;AT2G45050;AT3G06740;AT3G16870;AT3G21175;AT3G24050;AT3G54810;AT3G60530;AT4G17570;AT4G24470;AT4G26150;AT4G32890;AT4G34680;AT5G25830;AT5G26930;AT5G56860;AT5G66320;AT2G18380;AT3G50870;AT4G36620
Vc9p318.12	UGT73C6(Vc9p318.12)	TF_motif_seq_0237		780	-	TATCA	GATA; tify	AT1G51600;AT2G45050;AT3G06740;AT3G16870;AT3G21175;AT3G24050;AT3G54810;AT3G60530;AT4G17570;AT4G24470;AT4G26150;AT4G32890;AT4G34680;AT5G25830;AT5G26930;AT5G56860;AT5G66320;AT2G18380;AT3G50870;AT4G36620
Vc9p318.12	UGT73C6(Vc9p318.12)	TF_motif_seq_0237		786	+	TGATA	GATA; tify	AT1G51600;AT2G45050;AT3G06740;AT3G16870;AT3G21175;AT3G24050;AT3G54810;AT3G60530;AT4G17570;AT4G24470;AT4G26150;AT4G32890;AT4G34680;AT5G25830;AT5G26930;AT5G56860;AT5G66320;AT2G18380;AT3G50870;AT4G36620
Vc9p318.12	UGT73C6(Vc9p318.12)	TF_motif_seq_0237		909	-	TATCC	GATA; tify	AT1G51600;AT2G45050;AT3G06740;AT3G16870;AT3G21175;AT3G24050;AT3G54810;AT3G60530;AT4G17570;AT4G24470;AT4G26150;AT4G32890;AT4G34680;AT5G25830;AT5G26930;AT5G56860;AT5G66320;AT2G18380;AT3G50870;AT4G36620
Vc9p318.12	UGT73C6(Vc9p318.12)	TF_motif_seq_0237		930	-	CATCT	GATA; tify	AT1G51600;AT2G45050;AT3G06740;AT3G16870;AT3G21175;AT3G24050;AT3G54810;AT3G60530;AT4G17570;AT4G24470;AT4G26150;AT4G32890;AT4G34680;AT5G25830;AT5G26930;AT5G56860;AT5G66320;AT2G18380;AT3G50870;AT4G36620
Vc9p318.12	UGT73C6(Vc9p318.12)	TF_motif_seq_0237		946	+	TGATC	GATA; tify	AT1G51600;AT2G45050;AT3G06740;AT3G16870;AT3G21175;AT3G24050;AT3G54810;AT3G60530;AT4G17570;AT4G24470;AT4G26150;AT4G32890;AT4G34680;AT5G25830;AT5G26930;AT5G56860;AT5G66320;AT2G18380;AT3G50870;AT4G36620
Vc9p318.12	UGT73C6(Vc9p318.12)	TF_motif_seq_0237		947	-	GATCT	GATA; tify	AT1G51600;AT2G45050;AT3G06740;AT3G16870;AT3G21175;AT3G24050;AT3G54810;AT3G60530;AT4G17570;AT4G24470;AT4G26150;AT4G32890;AT4G34680;AT5G25830;AT5G26930;AT5G56860;AT5G66320;AT2G18380;AT3G50870;AT4G36620
Vc9p318.12	UGT73C6(Vc9p318.12)	TF_motif_seq_0237		999	+	GGATC	GATA; tify	AT1G51600;AT2G45050;AT3G06740;AT3G16870;AT3G21175;AT3G24050;AT3G54810;AT3G60530;AT4G17570;AT4G24470;AT4G26150;AT4G32890;AT4G34680;AT5G25830;AT5G26930;AT5G56860;AT5G66320;AT2G18380;AT3G50870;AT4G36620
Vc9p318.12	UGT73C6(Vc9p318.12)	TF_motif_seq_0237		1000	-	GATCT	GATA; tify	AT1G51600;AT2G45050;AT3G06740;AT3G16870;AT3G21175;AT3G24050;AT3G54810;AT3G60530;AT4G17570;AT4G24470;AT4G26150;AT4G32890;AT4G34680;AT5G25830;AT5G26930;AT5G56860;AT5G66320;AT2G18380;AT3G50870;AT4G36620
Vc9p318.12	UGT73C6(Vc9p318.12)	TF_motif_seq_0237		1028	-	AATCT	GATA; tify	AT1G51600;AT2G45050;AT3G06740;AT3G16870;AT3G21175;AT3G24050;AT3G54810;AT3G60530;AT4G17570;AT4G24470;AT4G26150;AT4G32890;AT4G34680;AT5G25830;AT5G26930;AT5G56860;AT5G66320;AT2G18380;AT3G50870;AT4G36620
Vc9p318.12	UGT73C6(Vc9p318.12)	TF_motif_seq_0237		1072	-	AATCT	GATA; tify	AT1G51600;AT2G45050;AT3G06740;AT3G16870;AT3G21175;AT3G24050;AT3G54810;AT3G60530;AT4G17570;AT4G24470;AT4G26150;AT4G32890;AT4G34680;AT5G25830;AT5G26930;AT5G56860;AT5G66320;AT2G18380;AT3G50870;AT4G36620
Vc9p318.12	UGT73C6(Vc9p318.12)	TF_motif_seq_0237		1078	+	TGATC	GATA; tify	AT1G51600;AT2G45050;AT3G06740;AT3G16870;AT3G21175;AT3G24050;AT3G54810;AT3G60530;AT4G17570;AT4G24470;AT4G26150;AT4G32890;AT4G34680;AT5G25830;AT5G26930;AT5G56860;AT5G66320;AT2G18380;AT3G50870;AT4G36620
Vc9p318.12	UGT73C6(Vc9p318.12)	TF_motif_seq_0237		1079	-	GATCT	GATA; tify	AT1G51600;AT2G45050;AT3G06740;AT3G16870;AT3G21175;AT3G24050;AT3G54810;AT3G60530;AT4G17570;AT4G24470;AT4G26150;AT4G32890;AT4G34680;AT5G25830;AT5G26930;AT5G56860;AT5G66320;AT2G18380;AT3G50870;AT4G36620
Vc9p318.12	UGT73C6(Vc9p318.12)	TF_motif_seq_0237		1099	-	AATCT	GATA; tify	AT1G51600;AT2G45050;AT3G06740;AT3G16870;AT3G21175;AT3G24050;AT3G54810;AT3G60530;AT4G17570;AT4G24470;AT4G26150;AT4G32890;AT4G34680;AT5G25830;AT5G26930;AT5G56860;AT5G66320;AT2G18380;AT3G50870;AT4G36620
Vc9p318.12	UGT73C6(Vc9p318.12)	TF_motif_seq_0237		1148	-	TATCT	GATA; tify	AT1G51600;AT2G45050;AT3G06740;AT3G16870;AT3G21175;AT3G24050;AT3G54810;AT3G60530;AT4G17570;AT4G24470;AT4G26150;AT4G32890;AT4G34680;AT5G25830;AT5G26930;AT5G56860;AT5G66320;AT2G18380;AT3G50870;AT4G36620
Vc9p318.12	UGT73C6(Vc9p318.12)	TF_motif_seq_0237		1153	-	TATCT	GATA; tify	AT1G51600;AT2G45050;AT3G06740;AT3G16870;AT3G21175;AT3G24050;AT3G54810;AT3G60530;AT4G17570;AT4G24470;AT4G26150;AT4G32890;AT4G34680;AT5G25830;AT5G26930;AT5G56860;AT5G66320;AT2G18380;AT3G50870;AT4G36620
Vc9p318.12	UGT73C6(Vc9p318.12)	TF_motif_seq_0237		1174	-	CATCC	GATA; tify	AT1G51600;AT2G45050;AT3G06740;AT3G16870;AT3G21175;AT3G24050;AT3G54810;AT3G60530;AT4G17570;AT4G24470;AT4G26150;AT4G32890;AT4G34680;AT5G25830;AT5G26930;AT5G56860;AT5G66320;AT2G18380;AT3G50870;AT4G36620
Vc9p318.12	UGT73C6(Vc9p318.12)	TF_motif_seq_0237		1256	-	TATCT	GATA; tify	AT1G51600;AT2G45050;AT3G06740;AT3G16870;AT3G21175;AT3G24050;AT3G54810;AT3G60530;AT4G17570;AT4G24470;AT4G26150;AT4G32890;AT4G34680;AT5G25830;AT5G26930;AT5G56860;AT5G66320;AT2G18380;AT3G50870;AT4G36620
Vc9p318.12	UGT73C6(Vc9p318.12)	TF_motif_seq_0237		1266	+	TGATG	GATA; tify	AT1G51600;AT2G45050;AT3G06740;AT3G16870;AT3G21175;AT3G24050;AT3G54810;AT3G60530;AT4G17570;AT4G24470;AT4G26150;AT4G32890;AT4G34680;AT5G25830;AT5G26930;AT5G56860;AT5G66320;AT2G18380;AT3G50870;AT4G36620
Vc9p318.12	UGT73C6(Vc9p318.12)	TF_motif_seq_0237		1270	+	GGATT	GATA; tify	AT1G51600;AT2G45050;AT3G06740;AT3G16870;AT3G21175;AT3G24050;AT3G54810;AT3G60530;AT4G17570;AT4G24470;AT4G26150;AT4G32890;AT4G34680;AT5G25830;AT5G26930;AT5G56860;AT5G66320;AT2G18380;AT3G50870;AT4G36620
Vc9p318.12	UGT73C6(Vc9p318.12)	TF_motif_seq_0237		1277	-	TATCT	GATA; tify	AT1G51600;AT2G45050;AT3G06740;AT3G16870;AT3G21175;AT3G24050;AT3G54810;AT3G60530;AT4G17570;AT4G24470;AT4G26150;AT4G32890;AT4G34680;AT5G25830;AT5G26930;AT5G56860;AT5G66320;AT2G18380;AT3G50870;AT4G36620
Vc9p318.12	UGT73C6(Vc9p318.12)	TF_motif_seq_0237		1306	+	TGATG	GATA; tify	AT1G51600;AT2G45050;AT3G06740;AT3G16870;AT3G21175;AT3G24050;AT3G54810;AT3G60530;AT4G17570;AT4G24470;AT4G26150;AT4G32890;AT4G34680;AT5G25830;AT5G26930;AT5G56860;AT5G66320;AT2G18380;AT3G50870;AT4G36620
Vc9p318.12	UGT73C6(Vc9p318.12)	TF_motif_seq_0237		1309	+	TGATT	GATA; tify	AT1G51600;AT2G45050;AT3G06740;AT3G16870;AT3G21175;AT3G24050;AT3G54810;AT3G60530;AT4G17570;AT4G24470;AT4G26150;AT4G32890;AT4G34680;AT5G25830;AT5G26930;AT5G56860;AT5G66320;AT2G18380;AT3G50870;AT4G36620
Vc9p318.12	UGT73C6(Vc9p318.12)	TF_motif_seq_0237		1346	-	TATCC	GATA; tify	AT1G51600;AT2G45050;AT3G06740;AT3G16870;AT3G21175;AT3G24050;AT3G54810;AT3G60530;AT4G17570;AT4G24470;AT4G26150;AT4G32890;AT4G34680;AT5G25830;AT5G26930;AT5G56860;AT5G66320;AT2G18380;AT3G50870;AT4G36620
Vc9p318.12	UGT73C6(Vc9p318.12)	TF_motif_seq_0237		1379	-	TATCT	GATA; tify	AT1G51600;AT2G45050;AT3G06740;AT3G16870;AT3G21175;AT3G24050;AT3G54810;AT3G60530;AT4G17570;AT4G24470;AT4G26150;AT4G32890;AT4G34680;AT5G25830;AT5G26930;AT5G56860;AT5G66320;AT2G18380;AT3G50870;AT4G36620
Vc9p318.12	UGT73C6(Vc9p318.12)	TF_motif_seq_0237		1433	-	TATCT	GATA; tify	AT1G51600;AT2G45050;AT3G06740;AT3G16870;AT3G21175;AT3G24050;AT3G54810;AT3G60530;AT4G17570;AT4G24470;AT4G26150;AT4G32890;AT4G34680;AT5G25830;AT5G26930;AT5G56860;AT5G66320;AT2G18380;AT3G50870;AT4G36620
Vc9p318.12	UGT73C6(Vc9p318.12)	TF_motif_seq_0237		1528	+	TGATC	GATA; tify	AT1G51600;AT2G45050;AT3G06740;AT3G16870;AT3G21175;AT3G24050;AT3G54810;AT3G60530;AT4G17570;AT4G24470;AT4G26150;AT4G32890;AT4G34680;AT5G25830;AT5G26930;AT5G56860;AT5G66320;AT2G18380;AT3G50870;AT4G36620
Vc9p318.12	UGT73C6(Vc9p318.12)	TF_motif_seq_0237		1529	-	GATCG	GATA; tify	AT1G51600;AT2G45050;AT3G06740;AT3G16870;AT3G21175;AT3G24050;AT3G54810;AT3G60530;AT4G17570;AT4G24470;AT4G26150;AT4G32890;AT4G34680;AT5G25830;AT5G26930;AT5G56860;AT5G66320;AT2G18380;AT3G50870;AT4G36620
Vc9p318.12	UGT73C6(Vc9p318.12)	TF_motif_seq_0237		1582	+	AGATG	GATA; tify	AT1G51600;AT2G45050;AT3G06740;AT3G16870;AT3G21175;AT3G24050;AT3G54810;AT3G60530;AT4G17570;AT4G24470;AT4G26150;AT4G32890;AT4G34680;AT5G25830;AT5G26930;AT5G56860;AT5G66320;AT2G18380;AT3G50870;AT4G36620
Vc9p318.12	UGT73C6(Vc9p318.12)	TF_motif_seq_0237		1610	+	AGATA	GATA; tify	AT1G51600;AT2G45050;AT3G06740;AT3G16870;AT3G21175;AT3G24050;AT3G54810;AT3G60530;AT4G17570;AT4G24470;AT4G26150;AT4G32890;AT4G34680;AT5G25830;AT5G26930;AT5G56860;AT5G66320;AT2G18380;AT3G50870;AT4G36620
Vc9p318.12	UGT73C6(Vc9p318.12)	TF_motif_seq_0237		1687	+	TGATT	GATA; tify	AT1G51600;AT2G45050;AT3G06740;AT3G16870;AT3G21175;AT3G24050;AT3G54810;AT3G60530;AT4G17570;AT4G24470;AT4G26150;AT4G32890;AT4G34680;AT5G25830;AT5G26930;AT5G56860;AT5G66320;AT2G18380;AT3G50870;AT4G36620
Vc9p318.12	UGT73C6(Vc9p318.12)	TF_motif_seq_0237		1709	-	CATCA	GATA; tify	AT1G51600;AT2G45050;AT3G06740;AT3G16870;AT3G21175;AT3G24050;AT3G54810;AT3G60530;AT4G17570;AT4G24470;AT4G26150;AT4G32890;AT4G34680;AT5G25830;AT5G26930;AT5G56860;AT5G66320;AT2G18380;AT3G50870;AT4G36620
Vc9p318.12	UGT73C6(Vc9p318.12)	TF_motif_seq_0237		1717	+	CGATA	GATA; tify	AT1G51600;AT2G45050;AT3G06740;AT3G16870;AT3G21175;AT3G24050;AT3G54810;AT3G60530;AT4G17570;AT4G24470;AT4G26150;AT4G32890;AT4G34680;AT5G25830;AT5G26930;AT5G56860;AT5G66320;AT2G18380;AT3G50870;AT4G36620
Vc9p318.12	UGT73C6(Vc9p318.12)	TF_motif_seq_0237		1720	-	TATCT	GATA; tify	AT1G51600;AT2G45050;AT3G06740;AT3G16870;AT3G21175;AT3G24050;AT3G54810;AT3G60530;AT4G17570;AT4G24470;AT4G26150;AT4G32890;AT4G34680;AT5G25830;AT5G26930;AT5G56860;AT5G66320;AT2G18380;AT3G50870;AT4G36620
Vc9p318.12	UGT73C6(Vc9p318.12)	TF_motif_seq_0237		1725	-	TATCA	GATA; tify	AT1G51600;AT2G45050;AT3G06740;AT3G16870;AT3G21175;AT3G24050;AT3G54810;AT3G60530;AT4G17570;AT4G24470;AT4G26150;AT4G32890;AT4G34680;AT5G25830;AT5G26930;AT5G56860;AT5G66320;AT2G18380;AT3G50870;AT4G36620
Vc9p318.12	UGT73C6(Vc9p318.12)	TF_motif_seq_0237		1736	+	AGATC	GATA; tify	AT1G51600;AT2G45050;AT3G06740;AT3G16870;AT3G21175;AT3G24050;AT3G54810;AT3G60530;AT4G17570;AT4G24470;AT4G26150;AT4G32890;AT4G34680;AT5G25830;AT5G26930;AT5G56860;AT5G66320;AT2G18380;AT3G50870;AT4G36620
Vc9p318.12	UGT73C6(Vc9p318.12)	TF_motif_seq_0237		1737	-	GATCA	GATA; tify	AT1G51600;AT2G45050;AT3G06740;AT3G16870;AT3G21175;AT3G24050;AT3G54810;AT3G60530;AT4G17570;AT4G24470;AT4G26150;AT4G32890;AT4G34680;AT5G25830;AT5G26930;AT5G56860;AT5G66320;AT2G18380;AT3G50870;AT4G36620
Vc9p318.12	UGT73C6(Vc9p318.12)	TF_motif_seq_0237		1742	+	GGATG	GATA; tify	AT1G51600;AT2G45050;AT3G06740;AT3G16870;AT3G21175;AT3G24050;AT3G54810;AT3G60530;AT4G17570;AT4G24470;AT4G26150;AT4G32890;AT4G34680;AT5G25830;AT5G26930;AT5G56860;AT5G66320;AT2G18380;AT3G50870;AT4G36620
Vc9p318.12	UGT73C6(Vc9p318.12)	TF_motif_seq_0237		1748	+	GGATC	GATA; tify	AT1G51600;AT2G45050;AT3G06740;AT3G16870;AT3G21175;AT3G24050;AT3G54810;AT3G60530;AT4G17570;AT4G24470;AT4G26150;AT4G32890;AT4G34680;AT5G25830;AT5G26930;AT5G56860;AT5G66320;AT2G18380;AT3G50870;AT4G36620
Vc9p318.12	UGT73C6(Vc9p318.12)	TF_motif_seq_0237		1749	-	GATCG	GATA; tify	AT1G51600;AT2G45050;AT3G06740;AT3G16870;AT3G21175;AT3G24050;AT3G54810;AT3G60530;AT4G17570;AT4G24470;AT4G26150;AT4G32890;AT4G34680;AT5G25830;AT5G26930;AT5G56860;AT5G66320;AT2G18380;AT3G50870;AT4G36620
Vc9p318.12	UGT73C6(Vc9p318.12)	TF_motif_seq_0237		1800	-	AATCT	GATA; tify	AT1G51600;AT2G45050;AT3G06740;AT3G16870;AT3G21175;AT3G24050;AT3G54810;AT3G60530;AT4G17570;AT4G24470;AT4G26150;AT4G32890;AT4G34680;AT5G25830;AT5G26930;AT5G56860;AT5G66320;AT2G18380;AT3G50870;AT4G36620
Vc9p318.12	UGT73C6(Vc9p318.12)	TF_motif_seq_0237		1832	-	AATCA	GATA; tify	AT1G51600;AT2G45050;AT3G06740;AT3G16870;AT3G21175;AT3G24050;AT3G54810;AT3G60530;AT4G17570;AT4G24470;AT4G26150;AT4G32890;AT4G34680;AT5G25830;AT5G26930;AT5G56860;AT5G66320;AT2G18380;AT3G50870;AT4G36620
Vc9p318.12	UGT73C6(Vc9p318.12)	TF_motif_seq_0237		1856	-	AATCA	GATA; tify	AT1G51600;AT2G45050;AT3G06740;AT3G16870;AT3G21175;AT3G24050;AT3G54810;AT3G60530;AT4G17570;AT4G24470;AT4G26150;AT4G32890;AT4G34680;AT5G25830;AT5G26930;AT5G56860;AT5G66320;AT2G18380;AT3G50870;AT4G36620
Vc9p318.12	UGT73C6(Vc9p318.12)	TF_motif_seq_0237		1872	-	AATCG	GATA; tify	AT1G51600;AT2G45050;AT3G06740;AT3G16870;AT3G21175;AT3G24050;AT3G54810;AT3G60530;AT4G17570;AT4G24470;AT4G26150;AT4G32890;AT4G34680;AT5G25830;AT5G26930;AT5G56860;AT5G66320;AT2G18380;AT3G50870;AT4G36620
Vc9p318.12	UGT73C6(Vc9p318.12)	TF_motif_seq_0237		1930	-	CATCC	GATA; tify	AT1G51600;AT2G45050;AT3G06740;AT3G16870;AT3G21175;AT3G24050;AT3G54810;AT3G60530;AT4G17570;AT4G24470;AT4G26150;AT4G32890;AT4G34680;AT5G25830;AT5G26930;AT5G56860;AT5G66320;AT2G18380;AT3G50870;AT4G36620
Vc9p318.12	UGT73C6(Vc9p318.12)	TF_motif_seq_0239		28	+	AAAGT	Dof	AT1G29160;AT1G64620;AT2G37590;AT3G21270;AT3G45610;AT3G47500;AT4G38000;AT5G39660;AT5G60200;AT5G60850;AT5G62940;AT2G46590;AT1G07640;AT1G21340;AT1G26790;AT1G47655;AT1G51700;AT1G69570;AT2G28510;AT2G28810;AT2G34140;AT3G50410;AT3G55370;AT3G61850;AT4G00940;AT4G21050;AT4G21080;AT4G24060;AT5G02460;AT5G62430;AT5G65590;AT5G66940
Vc9p318.12	UGT73C6(Vc9p318.12)	TF_motif_seq_0239		35	+	AAAGT	Dof	AT1G29160;AT1G64620;AT2G37590;AT3G21270;AT3G45610;AT3G47500;AT4G38000;AT5G39660;AT5G60200;AT5G60850;AT5G62940;AT2G46590;AT1G07640;AT1G21340;AT1G26790;AT1G47655;AT1G51700;AT1G69570;AT2G28510;AT2G28810;AT2G34140;AT3G50410;AT3G55370;AT3G61850;AT4G00940;AT4G21050;AT4G21080;AT4G24060;AT5G02460;AT5G62430;AT5G65590;AT5G66940
Vc9p318.12	UGT73C6(Vc9p318.12)	TF_motif_seq_0239		62	+	AAAGA	Dof	AT1G29160;AT1G64620;AT2G37590;AT3G21270;AT3G45610;AT3G47500;AT4G38000;AT5G39660;AT5G60200;AT5G60850;AT5G62940;AT2G46590;AT1G07640;AT1G21340;AT1G26790;AT1G47655;AT1G51700;AT1G69570;AT2G28510;AT2G28810;AT2G34140;AT3G50410;AT3G55370;AT3G61850;AT4G00940;AT4G21050;AT4G21080;AT4G24060;AT5G02460;AT5G62430;AT5G65590;AT5G66940
Vc9p318.12	UGT73C6(Vc9p318.12)	TF_motif_seq_0239		69	+	AAAGT	Dof	AT1G29160;AT1G64620;AT2G37590;AT3G21270;AT3G45610;AT3G47500;AT4G38000;AT5G39660;AT5G60200;AT5G60850;AT5G62940;AT2G46590;AT1G07640;AT1G21340;AT1G26790;AT1G47655;AT1G51700;AT1G69570;AT2G28510;AT2G28810;AT2G34140;AT3G50410;AT3G55370;AT3G61850;AT4G00940;AT4G21050;AT4G21080;AT4G24060;AT5G02460;AT5G62430;AT5G65590;AT5G66940
Vc9p318.12	UGT73C6(Vc9p318.12)	TF_motif_seq_0239		76	-	ACTTT	Dof	AT1G29160;AT1G64620;AT2G37590;AT3G21270;AT3G45610;AT3G47500;AT4G38000;AT5G39660;AT5G60200;AT5G60850;AT5G62940;AT2G46590;AT1G07640;AT1G21340;AT1G26790;AT1G47655;AT1G51700;AT1G69570;AT2G28510;AT2G28810;AT2G34140;AT3G50410;AT3G55370;AT3G61850;AT4G00940;AT4G21050;AT4G21080;AT4G24060;AT5G02460;AT5G62430;AT5G65590;AT5G66940
Vc9p318.12	UGT73C6(Vc9p318.12)	TF_motif_seq_0239		148	-	ACTTT	Dof	AT1G29160;AT1G64620;AT2G37590;AT3G21270;AT3G45610;AT3G47500;AT4G38000;AT5G39660;AT5G60200;AT5G60850;AT5G62940;AT2G46590;AT1G07640;AT1G21340;AT1G26790;AT1G47655;AT1G51700;AT1G69570;AT2G28510;AT2G28810;AT2G34140;AT3G50410;AT3G55370;AT3G61850;AT4G00940;AT4G21050;AT4G21080;AT4G24060;AT5G02460;AT5G62430;AT5G65590;AT5G66940
Vc9p318.12	UGT73C6(Vc9p318.12)	TF_motif_seq_0239		230	-	ACTTT	Dof	AT1G29160;AT1G64620;AT2G37590;AT3G21270;AT3G45610;AT3G47500;AT4G38000;AT5G39660;AT5G60200;AT5G60850;AT5G62940;AT2G46590;AT1G07640;AT1G21340;AT1G26790;AT1G47655;AT1G51700;AT1G69570;AT2G28510;AT2G28810;AT2G34140;AT3G50410;AT3G55370;AT3G61850;AT4G00940;AT4G21050;AT4G21080;AT4G24060;AT5G02460;AT5G62430;AT5G65590;AT5G66940
Vc9p318.12	UGT73C6(Vc9p318.12)	TF_motif_seq_0239		236	+	AAAGG	Dof	AT1G29160;AT1G64620;AT2G37590;AT3G21270;AT3G45610;AT3G47500;AT4G38000;AT5G39660;AT5G60200;AT5G60850;AT5G62940;AT2G46590;AT1G07640;AT1G21340;AT1G26790;AT1G47655;AT1G51700;AT1G69570;AT2G28510;AT2G28810;AT2G34140;AT3G50410;AT3G55370;AT3G61850;AT4G00940;AT4G21050;AT4G21080;AT4G24060;AT5G02460;AT5G62430;AT5G65590;AT5G66940
Vc9p318.12	UGT73C6(Vc9p318.12)	TF_motif_seq_0239		237	+	AAGGT	Dof	AT1G29160;AT1G64620;AT2G37590;AT3G21270;AT3G45610;AT3G47500;AT4G38000;AT5G39660;AT5G60200;AT5G60850;AT5G62940;AT2G46590;AT1G07640;AT1G21340;AT1G26790;AT1G47655;AT1G51700;AT1G69570;AT2G28510;AT2G28810;AT2G34140;AT3G50410;AT3G55370;AT3G61850;AT4G00940;AT4G21050;AT4G21080;AT4G24060;AT5G02460;AT5G62430;AT5G65590;AT5G66940
Vc9p318.12	UGT73C6(Vc9p318.12)	TF_motif_seq_0239		325	+	AAAGT	Dof	AT1G29160;AT1G64620;AT2G37590;AT3G21270;AT3G45610;AT3G47500;AT4G38000;AT5G39660;AT5G60200;AT5G60850;AT5G62940;AT2G46590;AT1G07640;AT1G21340;AT1G26790;AT1G47655;AT1G51700;AT1G69570;AT2G28510;AT2G28810;AT2G34140;AT3G50410;AT3G55370;AT3G61850;AT4G00940;AT4G21050;AT4G21080;AT4G24060;AT5G02460;AT5G62430;AT5G65590;AT5G66940
Vc9p318.12	UGT73C6(Vc9p318.12)	TF_motif_seq_0239		390	-	CCCTT	Dof	AT1G29160;AT1G64620;AT2G37590;AT3G21270;AT3G45610;AT3G47500;AT4G38000;AT5G39660;AT5G60200;AT5G60850;AT5G62940;AT2G46590;AT1G07640;AT1G21340;AT1G26790;AT1G47655;AT1G51700;AT1G69570;AT2G28510;AT2G28810;AT2G34140;AT3G50410;AT3G55370;AT3G61850;AT4G00940;AT4G21050;AT4G21080;AT4G24060;AT5G02460;AT5G62430;AT5G65590;AT5G66940
Vc9p318.12	UGT73C6(Vc9p318.12)	TF_motif_seq_0239		391	-	CCTTT	Dof	AT1G29160;AT1G64620;AT2G37590;AT3G21270;AT3G45610;AT3G47500;AT4G38000;AT5G39660;AT5G60200;AT5G60850;AT5G62940;AT2G46590;AT1G07640;AT1G21340;AT1G26790;AT1G47655;AT1G51700;AT1G69570;AT2G28510;AT2G28810;AT2G34140;AT3G50410;AT3G55370;AT3G61850;AT4G00940;AT4G21050;AT4G21080;AT4G24060;AT5G02460;AT5G62430;AT5G65590;AT5G66940
Vc9p318.12	UGT73C6(Vc9p318.12)	TF_motif_seq_0239		475	-	TCTTT	Dof	AT1G29160;AT1G64620;AT2G37590;AT3G21270;AT3G45610;AT3G47500;AT4G38000;AT5G39660;AT5G60200;AT5G60850;AT5G62940;AT2G46590;AT1G07640;AT1G21340;AT1G26790;AT1G47655;AT1G51700;AT1G69570;AT2G28510;AT2G28810;AT2G34140;AT3G50410;AT3G55370;AT3G61850;AT4G00940;AT4G21050;AT4G21080;AT4G24060;AT5G02460;AT5G62430;AT5G65590;AT5G66940
Vc9p318.12	UGT73C6(Vc9p318.12)	TF_motif_seq_0239		509	+	AAAGG	Dof	AT1G29160;AT1G64620;AT2G37590;AT3G21270;AT3G45610;AT3G47500;AT4G38000;AT5G39660;AT5G60200;AT5G60850;AT5G62940;AT2G46590;AT1G07640;AT1G21340;AT1G26790;AT1G47655;AT1G51700;AT1G69570;AT2G28510;AT2G28810;AT2G34140;AT3G50410;AT3G55370;AT3G61850;AT4G00940;AT4G21050;AT4G21080;AT4G24060;AT5G02460;AT5G62430;AT5G65590;AT5G66940
Vc9p318.12	UGT73C6(Vc9p318.12)	TF_motif_seq_0239		510	+	AAGGC	Dof	AT1G29160;AT1G64620;AT2G37590;AT3G21270;AT3G45610;AT3G47500;AT4G38000;AT5G39660;AT5G60200;AT5G60850;AT5G62940;AT2G46590;AT1G07640;AT1G21340;AT1G26790;AT1G47655;AT1G51700;AT1G69570;AT2G28510;AT2G28810;AT2G34140;AT3G50410;AT3G55370;AT3G61850;AT4G00940;AT4G21050;AT4G21080;AT4G24060;AT5G02460;AT5G62430;AT5G65590;AT5G66940
Vc9p318.12	UGT73C6(Vc9p318.12)	TF_motif_seq_0239		601	+	AAAGT	Dof	AT1G29160;AT1G64620;AT2G37590;AT3G21270;AT3G45610;AT3G47500;AT4G38000;AT5G39660;AT5G60200;AT5G60850;AT5G62940;AT2G46590;AT1G07640;AT1G21340;AT1G26790;AT1G47655;AT1G51700;AT1G69570;AT2G28510;AT2G28810;AT2G34140;AT3G50410;AT3G55370;AT3G61850;AT4G00940;AT4G21050;AT4G21080;AT4G24060;AT5G02460;AT5G62430;AT5G65590;AT5G66940
Vc9p318.12	UGT73C6(Vc9p318.12)	TF_motif_seq_0239		755	-	GCTTT	Dof	AT1G29160;AT1G64620;AT2G37590;AT3G21270;AT3G45610;AT3G47500;AT4G38000;AT5G39660;AT5G60200;AT5G60850;AT5G62940;AT2G46590;AT1G07640;AT1G21340;AT1G26790;AT1G47655;AT1G51700;AT1G69570;AT2G28510;AT2G28810;AT2G34140;AT3G50410;AT3G55370;AT3G61850;AT4G00940;AT4G21050;AT4G21080;AT4G24060;AT5G02460;AT5G62430;AT5G65590;AT5G66940
Vc9p318.12	UGT73C6(Vc9p318.12)	TF_motif_seq_0239		767	-	TCTTT	Dof	AT1G29160;AT1G64620;AT2G37590;AT3G21270;AT3G45610;AT3G47500;AT4G38000;AT5G39660;AT5G60200;AT5G60850;AT5G62940;AT2G46590;AT1G07640;AT1G21340;AT1G26790;AT1G47655;AT1G51700;AT1G69570;AT2G28510;AT2G28810;AT2G34140;AT3G50410;AT3G55370;AT3G61850;AT4G00940;AT4G21050;AT4G21080;AT4G24060;AT5G02460;AT5G62430;AT5G65590;AT5G66940
Vc9p318.12	UGT73C6(Vc9p318.12)	TF_motif_seq_0239		979	-	TCTTT	Dof	AT1G29160;AT1G64620;AT2G37590;AT3G21270;AT3G45610;AT3G47500;AT4G38000;AT5G39660;AT5G60200;AT5G60850;AT5G62940;AT2G46590;AT1G07640;AT1G21340;AT1G26790;AT1G47655;AT1G51700;AT1G69570;AT2G28510;AT2G28810;AT2G34140;AT3G50410;AT3G55370;AT3G61850;AT4G00940;AT4G21050;AT4G21080;AT4G24060;AT5G02460;AT5G62430;AT5G65590;AT5G66940
Vc9p318.12	UGT73C6(Vc9p318.12)	TF_motif_seq_0239		1002	-	TCTTT	Dof	AT1G29160;AT1G64620;AT2G37590;AT3G21270;AT3G45610;AT3G47500;AT4G38000;AT5G39660;AT5G60200;AT5G60850;AT5G62940;AT2G46590;AT1G07640;AT1G21340;AT1G26790;AT1G47655;AT1G51700;AT1G69570;AT2G28510;AT2G28810;AT2G34140;AT3G50410;AT3G55370;AT3G61850;AT4G00940;AT4G21050;AT4G21080;AT4G24060;AT5G02460;AT5G62430;AT5G65590;AT5G66940
Vc9p318.12	UGT73C6(Vc9p318.12)	TF_motif_seq_0239		1052	+	AAAGG	Dof	AT1G29160;AT1G64620;AT2G37590;AT3G21270;AT3G45610;AT3G47500;AT4G38000;AT5G39660;AT5G60200;AT5G60850;AT5G62940;AT2G46590;AT1G07640;AT1G21340;AT1G26790;AT1G47655;AT1G51700;AT1G69570;AT2G28510;AT2G28810;AT2G34140;AT3G50410;AT3G55370;AT3G61850;AT4G00940;AT4G21050;AT4G21080;AT4G24060;AT5G02460;AT5G62430;AT5G65590;AT5G66940
Vc9p318.12	UGT73C6(Vc9p318.12)	TF_motif_seq_0239		1053	+	AAGGT	Dof	AT1G29160;AT1G64620;AT2G37590;AT3G21270;AT3G45610;AT3G47500;AT4G38000;AT5G39660;AT5G60200;AT5G60850;AT5G62940;AT2G46590;AT1G07640;AT1G21340;AT1G26790;AT1G47655;AT1G51700;AT1G69570;AT2G28510;AT2G28810;AT2G34140;AT3G50410;AT3G55370;AT3G61850;AT4G00940;AT4G21050;AT4G21080;AT4G24060;AT5G02460;AT5G62430;AT5G65590;AT5G66940
Vc9p318.12	UGT73C6(Vc9p318.12)	TF_motif_seq_0239		1084	-	ACCTT	Dof	AT1G29160;AT1G64620;AT2G37590;AT3G21270;AT3G45610;AT3G47500;AT4G38000;AT5G39660;AT5G60200;AT5G60850;AT5G62940;AT2G46590;AT1G07640;AT1G21340;AT1G26790;AT1G47655;AT1G51700;AT1G69570;AT2G28510;AT2G28810;AT2G34140;AT3G50410;AT3G55370;AT3G61850;AT4G00940;AT4G21050;AT4G21080;AT4G24060;AT5G02460;AT5G62430;AT5G65590;AT5G66940
Vc9p318.12	UGT73C6(Vc9p318.12)	TF_motif_seq_0239		1114	-	TCTTT	Dof	AT1G29160;AT1G64620;AT2G37590;AT3G21270;AT3G45610;AT3G47500;AT4G38000;AT5G39660;AT5G60200;AT5G60850;AT5G62940;AT2G46590;AT1G07640;AT1G21340;AT1G26790;AT1G47655;AT1G51700;AT1G69570;AT2G28510;AT2G28810;AT2G34140;AT3G50410;AT3G55370;AT3G61850;AT4G00940;AT4G21050;AT4G21080;AT4G24060;AT5G02460;AT5G62430;AT5G65590;AT5G66940
Vc9p318.12	UGT73C6(Vc9p318.12)	TF_motif_seq_0239		1205	+	AAAGC	Dof	AT1G29160;AT1G64620;AT2G37590;AT3G21270;AT3G45610;AT3G47500;AT4G38000;AT5G39660;AT5G60200;AT5G60850;AT5G62940;AT2G46590;AT1G07640;AT1G21340;AT1G26790;AT1G47655;AT1G51700;AT1G69570;AT2G28510;AT2G28810;AT2G34140;AT3G50410;AT3G55370;AT3G61850;AT4G00940;AT4G21050;AT4G21080;AT4G24060;AT5G02460;AT5G62430;AT5G65590;AT5G66940
Vc9p318.12	UGT73C6(Vc9p318.12)	TF_motif_seq_0239		1283	-	TCTTT	Dof	AT1G29160;AT1G64620;AT2G37590;AT3G21270;AT3G45610;AT3G47500;AT4G38000;AT5G39660;AT5G60200;AT5G60850;AT5G62940;AT2G46590;AT1G07640;AT1G21340;AT1G26790;AT1G47655;AT1G51700;AT1G69570;AT2G28510;AT2G28810;AT2G34140;AT3G50410;AT3G55370;AT3G61850;AT4G00940;AT4G21050;AT4G21080;AT4G24060;AT5G02460;AT5G62430;AT5G65590;AT5G66940
Vc9p318.12	UGT73C6(Vc9p318.12)	TF_motif_seq_0239		1335	-	TCTTT	Dof	AT1G29160;AT1G64620;AT2G37590;AT3G21270;AT3G45610;AT3G47500;AT4G38000;AT5G39660;AT5G60200;AT5G60850;AT5G62940;AT2G46590;AT1G07640;AT1G21340;AT1G26790;AT1G47655;AT1G51700;AT1G69570;AT2G28510;AT2G28810;AT2G34140;AT3G50410;AT3G55370;AT3G61850;AT4G00940;AT4G21050;AT4G21080;AT4G24060;AT5G02460;AT5G62430;AT5G65590;AT5G66940
Vc9p318.12	UGT73C6(Vc9p318.12)	TF_motif_seq_0239		1360	-	TCTTT	Dof	AT1G29160;AT1G64620;AT2G37590;AT3G21270;AT3G45610;AT3G47500;AT4G38000;AT5G39660;AT5G60200;AT5G60850;AT5G62940;AT2G46590;AT1G07640;AT1G21340;AT1G26790;AT1G47655;AT1G51700;AT1G69570;AT2G28510;AT2G28810;AT2G34140;AT3G50410;AT3G55370;AT3G61850;AT4G00940;AT4G21050;AT4G21080;AT4G24060;AT5G02460;AT5G62430;AT5G65590;AT5G66940
Vc9p318.12	UGT73C6(Vc9p318.12)	TF_motif_seq_0239		1381	-	TCTTT	Dof	AT1G29160;AT1G64620;AT2G37590;AT3G21270;AT3G45610;AT3G47500;AT4G38000;AT5G39660;AT5G60200;AT5G60850;AT5G62940;AT2G46590;AT1G07640;AT1G21340;AT1G26790;AT1G47655;AT1G51700;AT1G69570;AT2G28510;AT2G28810;AT2G34140;AT3G50410;AT3G55370;AT3G61850;AT4G00940;AT4G21050;AT4G21080;AT4G24060;AT5G02460;AT5G62430;AT5G65590;AT5G66940
Vc9p318.12	UGT73C6(Vc9p318.12)	TF_motif_seq_0239		1399	-	ACCTT	Dof	AT1G29160;AT1G64620;AT2G37590;AT3G21270;AT3G45610;AT3G47500;AT4G38000;AT5G39660;AT5G60200;AT5G60850;AT5G62940;AT2G46590;AT1G07640;AT1G21340;AT1G26790;AT1G47655;AT1G51700;AT1G69570;AT2G28510;AT2G28810;AT2G34140;AT3G50410;AT3G55370;AT3G61850;AT4G00940;AT4G21050;AT4G21080;AT4G24060;AT5G02460;AT5G62430;AT5G65590;AT5G66940
Vc9p318.12	UGT73C6(Vc9p318.12)	TF_motif_seq_0239		1400	-	CCTTT	Dof	AT1G29160;AT1G64620;AT2G37590;AT3G21270;AT3G45610;AT3G47500;AT4G38000;AT5G39660;AT5G60200;AT5G60850;AT5G62940;AT2G46590;AT1G07640;AT1G21340;AT1G26790;AT1G47655;AT1G51700;AT1G69570;AT2G28510;AT2G28810;AT2G34140;AT3G50410;AT3G55370;AT3G61850;AT4G00940;AT4G21050;AT4G21080;AT4G24060;AT5G02460;AT5G62430;AT5G65590;AT5G66940
Vc9p318.12	UGT73C6(Vc9p318.12)	TF_motif_seq_0239		1422	-	TCCTT	Dof	AT1G29160;AT1G64620;AT2G37590;AT3G21270;AT3G45610;AT3G47500;AT4G38000;AT5G39660;AT5G60200;AT5G60850;AT5G62940;AT2G46590;AT1G07640;AT1G21340;AT1G26790;AT1G47655;AT1G51700;AT1G69570;AT2G28510;AT2G28810;AT2G34140;AT3G50410;AT3G55370;AT3G61850;AT4G00940;AT4G21050;AT4G21080;AT4G24060;AT5G02460;AT5G62430;AT5G65590;AT5G66940
Vc9p318.12	UGT73C6(Vc9p318.12)	TF_motif_seq_0239		1444	-	TCTTT	Dof	AT1G29160;AT1G64620;AT2G37590;AT3G21270;AT3G45610;AT3G47500;AT4G38000;AT5G39660;AT5G60200;AT5G60850;AT5G62940;AT2G46590;AT1G07640;AT1G21340;AT1G26790;AT1G47655;AT1G51700;AT1G69570;AT2G28510;AT2G28810;AT2G34140;AT3G50410;AT3G55370;AT3G61850;AT4G00940;AT4G21050;AT4G21080;AT4G24060;AT5G02460;AT5G62430;AT5G65590;AT5G66940
Vc9p318.12	UGT73C6(Vc9p318.12)	TF_motif_seq_0239		1550	+	AAAGA	Dof	AT1G29160;AT1G64620;AT2G37590;AT3G21270;AT3G45610;AT3G47500;AT4G38000;AT5G39660;AT5G60200;AT5G60850;AT5G62940;AT2G46590;AT1G07640;AT1G21340;AT1G26790;AT1G47655;AT1G51700;AT1G69570;AT2G28510;AT2G28810;AT2G34140;AT3G50410;AT3G55370;AT3G61850;AT4G00940;AT4G21050;AT4G21080;AT4G24060;AT5G02460;AT5G62430;AT5G65590;AT5G66940
Vc9p318.12	UGT73C6(Vc9p318.12)	TF_motif_seq_0239		1608	+	AAAGA	Dof	AT1G29160;AT1G64620;AT2G37590;AT3G21270;AT3G45610;AT3G47500;AT4G38000;AT5G39660;AT5G60200;AT5G60850;AT5G62940;AT2G46590;AT1G07640;AT1G21340;AT1G26790;AT1G47655;AT1G51700;AT1G69570;AT2G28510;AT2G28810;AT2G34140;AT3G50410;AT3G55370;AT3G61850;AT4G00940;AT4G21050;AT4G21080;AT4G24060;AT5G02460;AT5G62430;AT5G65590;AT5G66940
Vc9p318.12	UGT73C6(Vc9p318.12)	TF_motif_seq_0239		1614	+	AAAGG	Dof	AT1G29160;AT1G64620;AT2G37590;AT3G21270;AT3G45610;AT3G47500;AT4G38000;AT5G39660;AT5G60200;AT5G60850;AT5G62940;AT2G46590;AT1G07640;AT1G21340;AT1G26790;AT1G47655;AT1G51700;AT1G69570;AT2G28510;AT2G28810;AT2G34140;AT3G50410;AT3G55370;AT3G61850;AT4G00940;AT4G21050;AT4G21080;AT4G24060;AT5G02460;AT5G62430;AT5G65590;AT5G66940
Vc9p318.12	UGT73C6(Vc9p318.12)	TF_motif_seq_0239		1615	+	AAGGA	Dof	AT1G29160;AT1G64620;AT2G37590;AT3G21270;AT3G45610;AT3G47500;AT4G38000;AT5G39660;AT5G60200;AT5G60850;AT5G62940;AT2G46590;AT1G07640;AT1G21340;AT1G26790;AT1G47655;AT1G51700;AT1G69570;AT2G28510;AT2G28810;AT2G34140;AT3G50410;AT3G55370;AT3G61850;AT4G00940;AT4G21050;AT4G21080;AT4G24060;AT5G02460;AT5G62430;AT5G65590;AT5G66940
Vc9p318.12	UGT73C6(Vc9p318.12)	TF_motif_seq_0239		1639	-	TCTTT	Dof	AT1G29160;AT1G64620;AT2G37590;AT3G21270;AT3G45610;AT3G47500;AT4G38000;AT5G39660;AT5G60200;AT5G60850;AT5G62940;AT2G46590;AT1G07640;AT1G21340;AT1G26790;AT1G47655;AT1G51700;AT1G69570;AT2G28510;AT2G28810;AT2G34140;AT3G50410;AT3G55370;AT3G61850;AT4G00940;AT4G21050;AT4G21080;AT4G24060;AT5G02460;AT5G62430;AT5G65590;AT5G66940
Vc9p318.12	UGT73C6(Vc9p318.12)	TF_motif_seq_0239		1664	+	AAAGT	Dof	AT1G29160;AT1G64620;AT2G37590;AT3G21270;AT3G45610;AT3G47500;AT4G38000;AT5G39660;AT5G60200;AT5G60850;AT5G62940;AT2G46590;AT1G07640;AT1G21340;AT1G26790;AT1G47655;AT1G51700;AT1G69570;AT2G28510;AT2G28810;AT2G34140;AT3G50410;AT3G55370;AT3G61850;AT4G00940;AT4G21050;AT4G21080;AT4G24060;AT5G02460;AT5G62430;AT5G65590;AT5G66940
Vc9p318.12	UGT73C6(Vc9p318.12)	TF_motif_seq_0239		1760	+	AAAGC	Dof	AT1G29160;AT1G64620;AT2G37590;AT3G21270;AT3G45610;AT3G47500;AT4G38000;AT5G39660;AT5G60200;AT5G60850;AT5G62940;AT2G46590;AT1G07640;AT1G21340;AT1G26790;AT1G47655;AT1G51700;AT1G69570;AT2G28510;AT2G28810;AT2G34140;AT3G50410;AT3G55370;AT3G61850;AT4G00940;AT4G21050;AT4G21080;AT4G24060;AT5G02460;AT5G62430;AT5G65590;AT5G66940
Vc9p318.12	UGT73C6(Vc9p318.12)	TF_motif_seq_0239		1763	-	GCTTT	Dof	AT1G29160;AT1G64620;AT2G37590;AT3G21270;AT3G45610;AT3G47500;AT4G38000;AT5G39660;AT5G60200;AT5G60850;AT5G62940;AT2G46590;AT1G07640;AT1G21340;AT1G26790;AT1G47655;AT1G51700;AT1G69570;AT2G28510;AT2G28810;AT2G34140;AT3G50410;AT3G55370;AT3G61850;AT4G00940;AT4G21050;AT4G21080;AT4G24060;AT5G02460;AT5G62430;AT5G65590;AT5G66940
Vc9p318.12	UGT73C6(Vc9p318.12)	TF_motif_seq_0239		1794	+	AAAGA	Dof	AT1G29160;AT1G64620;AT2G37590;AT3G21270;AT3G45610;AT3G47500;AT4G38000;AT5G39660;AT5G60200;AT5G60850;AT5G62940;AT2G46590;AT1G07640;AT1G21340;AT1G26790;AT1G47655;AT1G51700;AT1G69570;AT2G28510;AT2G28810;AT2G34140;AT3G50410;AT3G55370;AT3G61850;AT4G00940;AT4G21050;AT4G21080;AT4G24060;AT5G02460;AT5G62430;AT5G65590;AT5G66940
Vc9p318.12	UGT73C6(Vc9p318.12)	TF_motif_seq_0239		1840	-	GCTTT	Dof	AT1G29160;AT1G64620;AT2G37590;AT3G21270;AT3G45610;AT3G47500;AT4G38000;AT5G39660;AT5G60200;AT5G60850;AT5G62940;AT2G46590;AT1G07640;AT1G21340;AT1G26790;AT1G47655;AT1G51700;AT1G69570;AT2G28510;AT2G28810;AT2G34140;AT3G50410;AT3G55370;AT3G61850;AT4G00940;AT4G21050;AT4G21080;AT4G24060;AT5G02460;AT5G62430;AT5G65590;AT5G66940
Vc9p318.12	UGT73C6(Vc9p318.12)	TF_motif_seq_0239		1884	+	AAAGG	Dof	AT1G29160;AT1G64620;AT2G37590;AT3G21270;AT3G45610;AT3G47500;AT4G38000;AT5G39660;AT5G60200;AT5G60850;AT5G62940;AT2G46590;AT1G07640;AT1G21340;AT1G26790;AT1G47655;AT1G51700;AT1G69570;AT2G28510;AT2G28810;AT2G34140;AT3G50410;AT3G55370;AT3G61850;AT4G00940;AT4G21050;AT4G21080;AT4G24060;AT5G02460;AT5G62430;AT5G65590;AT5G66940
Vc9p318.12	UGT73C6(Vc9p318.12)	TF_motif_seq_0239		1885	+	AAGGA	Dof	AT1G29160;AT1G64620;AT2G37590;AT3G21270;AT3G45610;AT3G47500;AT4G38000;AT5G39660;AT5G60200;AT5G60850;AT5G62940;AT2G46590;AT1G07640;AT1G21340;AT1G26790;AT1G47655;AT1G51700;AT1G69570;AT2G28510;AT2G28810;AT2G34140;AT3G50410;AT3G55370;AT3G61850;AT4G00940;AT4G21050;AT4G21080;AT4G24060;AT5G02460;AT5G62430;AT5G65590;AT5G66940
Vc9p318.12	UGT73C6(Vc9p318.12)	TF_motif_seq_0239		1898	-	ACTTT	Dof	AT1G29160;AT1G64620;AT2G37590;AT3G21270;AT3G45610;AT3G47500;AT4G38000;AT5G39660;AT5G60200;AT5G60850;AT5G62940;AT2G46590;AT1G07640;AT1G21340;AT1G26790;AT1G47655;AT1G51700;AT1G69570;AT2G28510;AT2G28810;AT2G34140;AT3G50410;AT3G55370;AT3G61850;AT4G00940;AT4G21050;AT4G21080;AT4G24060;AT5G02460;AT5G62430;AT5G65590;AT5G66940
Vc9p318.12	UGT73C6(Vc9p318.12)	TF_motif_seq_0239		1960	-	TCTTT	Dof	AT1G29160;AT1G64620;AT2G37590;AT3G21270;AT3G45610;AT3G47500;AT4G38000;AT5G39660;AT5G60200;AT5G60850;AT5G62940;AT2G46590;AT1G07640;AT1G21340;AT1G26790;AT1G47655;AT1G51700;AT1G69570;AT2G28510;AT2G28810;AT2G34140;AT3G50410;AT3G55370;AT3G61850;AT4G00940;AT4G21050;AT4G21080;AT4G24060;AT5G02460;AT5G62430;AT5G65590;AT5G66940
Vc9p318.12	UGT73C6(Vc9p318.12)	TF_motif_seq_0240		2	-	AACGT	bZIP	AT3G54620;AT4G02640
Vc9p318.12	UGT73C6(Vc9p318.12)	TF_motif_seq_0240		3	+	ACGTG	bZIP	AT3G54620;AT4G02640
Vc9p318.12	UGT73C6(Vc9p318.12)	TF_motif_seq_0240		426	-	GACGT	bZIP	AT3G54620;AT4G02640
Vc9p318.12	UGT73C6(Vc9p318.12)	TF_motif_seq_0240		427	+	ACGTC	bZIP	AT3G54620;AT4G02640
Vc9p318.12	UGT73C6(Vc9p318.12)	TF_motif_seq_0240		828	-	AACGT	bZIP	AT3G54620;AT4G02640
Vc9p318.12	UGT73C6(Vc9p318.12)	TF_motif_seq_0240		829	+	ACGTC	bZIP	AT3G54620;AT4G02640
Vc9p318.12	UGT73C6(Vc9p318.12)	TF_motif_seq_0240		1138	-	AACGT	bZIP	AT3G54620;AT4G02640
Vc9p318.12	UGT73C6(Vc9p318.12)	TF_motif_seq_0240		1139	+	ACGTT	bZIP	AT3G54620;AT4G02640
Vc9p318.12	UGT73C6(Vc9p318.12)	TF_motif_seq_0240		1755	-	TACGT	bZIP	AT3G54620;AT4G02640
Vc9p318.12	UGT73C6(Vc9p318.12)	TF_motif_seq_0240		1756	+	ACGTA	bZIP	AT3G54620;AT4G02640
Vc9p318.12	UGT73C6(Vc9p318.12)	TF_motif_seq_0241		183	+	ATTAT	ZF-HD	AT1G75240
Vc9p318.12	UGT73C6(Vc9p318.12)	TF_motif_seq_0241		290	-	ATAAT	ZF-HD	AT1G75240
Vc9p318.12	UGT73C6(Vc9p318.12)	TF_motif_seq_0241		468	-	GTAAT	ZF-HD	AT1G75240
Vc9p318.12	UGT73C6(Vc9p318.12)	TF_motif_seq_0241		521	+	ATTAT	ZF-HD	AT1G75240
Vc9p318.12	UGT73C6(Vc9p318.12)	TF_motif_seq_0241		606	+	ATTAC	ZF-HD	AT1G75240
Vc9p318.12	UGT73C6(Vc9p318.12)	TF_motif_seq_0241		659	-	CTAAT	ZF-HD	AT1G75240
Vc9p318.12	UGT73C6(Vc9p318.12)	TF_motif_seq_0241		688	+	ATTAA	ZF-HD	AT1G75240
Vc9p318.12	UGT73C6(Vc9p318.12)	TF_motif_seq_0241		689	-	TTAAT	ZF-HD	AT1G75240
Vc9p318.12	UGT73C6(Vc9p318.12)	TF_motif_seq_0241		703	+	ATTAT	ZF-HD	AT1G75240
Vc9p318.12	UGT73C6(Vc9p318.12)	TF_motif_seq_0241		706	+	ATTAT	ZF-HD	AT1G75240
Vc9p318.12	UGT73C6(Vc9p318.12)	TF_motif_seq_0241		716	-	CTAAT	ZF-HD	AT1G75240
Vc9p318.12	UGT73C6(Vc9p318.12)	TF_motif_seq_0241		747	-	TTAAT	ZF-HD	AT1G75240
Vc9p318.12	UGT73C6(Vc9p318.12)	TF_motif_seq_0241		778	+	ATTAT	ZF-HD	AT1G75240
Vc9p318.12	UGT73C6(Vc9p318.12)	TF_motif_seq_0241		815	-	CTAAT	ZF-HD	AT1G75240
Vc9p318.12	UGT73C6(Vc9p318.12)	TF_motif_seq_0241		818	-	ATAAT	ZF-HD	AT1G75240
Vc9p318.12	UGT73C6(Vc9p318.12)	TF_motif_seq_0241		838	+	ATTAT	ZF-HD	AT1G75240
Vc9p318.12	UGT73C6(Vc9p318.12)	TF_motif_seq_0241		933	-	CTAAT	ZF-HD	AT1G75240
Vc9p318.12	UGT73C6(Vc9p318.12)	TF_motif_seq_0241		957	-	ATAAT	ZF-HD	AT1G75240
Vc9p318.12	UGT73C6(Vc9p318.12)	TF_motif_seq_0241		1013	-	TTAAT	ZF-HD	AT1G75240
Vc9p318.12	UGT73C6(Vc9p318.12)	TF_motif_seq_0241		1045	+	ATTAG	ZF-HD	AT1G75240
Vc9p318.12	UGT73C6(Vc9p318.12)	TF_motif_seq_0241		1065	+	ATTAT	ZF-HD	AT1G75240
Vc9p318.12	UGT73C6(Vc9p318.12)	TF_motif_seq_0241		1070	-	TTAAT	ZF-HD	AT1G75240
Vc9p318.12	UGT73C6(Vc9p318.12)	TF_motif_seq_0241		1192	-	TTAAT	ZF-HD	AT1G75240
Vc9p318.12	UGT73C6(Vc9p318.12)	TF_motif_seq_0241		1210	-	TTAAT	ZF-HD	AT1G75240
Vc9p318.12	UGT73C6(Vc9p318.12)	TF_motif_seq_0241		1244	-	CTAAT	ZF-HD	AT1G75240
Vc9p318.12	UGT73C6(Vc9p318.12)	TF_motif_seq_0241		1272	+	ATTAA	ZF-HD	AT1G75240
Vc9p318.12	UGT73C6(Vc9p318.12)	TF_motif_seq_0241		1273	-	TTAAT	ZF-HD	AT1G75240
Vc9p318.12	UGT73C6(Vc9p318.12)	TF_motif_seq_0241		1311	+	ATTAT	ZF-HD	AT1G75240
Vc9p318.12	UGT73C6(Vc9p318.12)	TF_motif_seq_0241		1355	-	TTAAT	ZF-HD	AT1G75240
Vc9p318.12	UGT73C6(Vc9p318.12)	TF_motif_seq_0241		1377	+	ATTAT	ZF-HD	AT1G75240
Vc9p318.12	UGT73C6(Vc9p318.12)	TF_motif_seq_0241		1411	-	TTAAT	ZF-HD	AT1G75240
Vc9p318.12	UGT73C6(Vc9p318.12)	TF_motif_seq_0241		1450	-	ATAAT	ZF-HD	AT1G75240
Vc9p318.12	UGT73C6(Vc9p318.12)	TF_motif_seq_0241		1508	-	TTAAT	ZF-HD	AT1G75240
Vc9p318.12	UGT73C6(Vc9p318.12)	TF_motif_seq_0241		1533	-	GTAAT	ZF-HD	AT1G75240
Vc9p318.12	UGT73C6(Vc9p318.12)	TF_motif_seq_0241		1541	-	CTAAT	ZF-HD	AT1G75240
Vc9p318.12	UGT73C6(Vc9p318.12)	TF_motif_seq_0241		1627	-	GTAAT	ZF-HD	AT1G75240
Vc9p318.12	UGT73C6(Vc9p318.12)	TF_motif_seq_0241		1806	-	GTAAT	ZF-HD	AT1G75240
Vc9p318.12	UGT73C6(Vc9p318.12)	TF_motif_seq_0241		1830	-	ATAAT	ZF-HD	AT1G75240
Vc9p318.12	UGT73C6(Vc9p318.12)	TF_motif_seq_0241		1955	+	ATTAT	ZF-HD	AT1G75240
Vc9p318.12	UGT73C6(Vc9p318.12)	TF_motif_seq_0241		1995	+	ATTAT	ZF-HD	AT1G75240
Vc9p318.12	UGT73C6(Vc9p318.12)	TF_motif_seq_0243		41	+	GATAG	GATA; tify	AT1G51600;AT2G45050;AT3G06740;AT3G16870;AT3G21175;AT3G24050;AT3G54810;AT3G60530;AT4G17570;AT4G24470;AT4G26150;AT4G32890;AT4G34680;AT5G25830;AT5G26930;AT5G56860;AT5G66320;AT2G18380;AT3G50870;AT4G36620
Vc9p318.12	UGT73C6(Vc9p318.12)	TF_motif_seq_0243		169	+	GATAC	GATA; tify	AT1G51600;AT2G45050;AT3G06740;AT3G16870;AT3G21175;AT3G24050;AT3G54810;AT3G60530;AT4G17570;AT4G24470;AT4G26150;AT4G32890;AT4G34680;AT5G25830;AT5G26930;AT5G56860;AT5G66320;AT2G18380;AT3G50870;AT4G36620
Vc9p318.12	UGT73C6(Vc9p318.12)	TF_motif_seq_0243		522	-	TTATC	GATA; tify	AT1G51600;AT2G45050;AT3G06740;AT3G16870;AT3G21175;AT3G24050;AT3G54810;AT3G60530;AT4G17570;AT4G24470;AT4G26150;AT4G32890;AT4G34680;AT5G25830;AT5G26930;AT5G56860;AT5G66320;AT2G18380;AT3G50870;AT4G36620
Vc9p318.12	UGT73C6(Vc9p318.12)	TF_motif_seq_0243		539	+	GATAG	GATA; tify	AT1G51600;AT2G45050;AT3G06740;AT3G16870;AT3G21175;AT3G24050;AT3G54810;AT3G60530;AT4G17570;AT4G24470;AT4G26150;AT4G32890;AT4G34680;AT5G25830;AT5G26930;AT5G56860;AT5G66320;AT2G18380;AT3G50870;AT4G36620
Vc9p318.12	UGT73C6(Vc9p318.12)	TF_motif_seq_0243		616	-	TTATC	GATA; tify	AT1G51600;AT2G45050;AT3G06740;AT3G16870;AT3G21175;AT3G24050;AT3G54810;AT3G60530;AT4G17570;AT4G24470;AT4G26150;AT4G32890;AT4G34680;AT5G25830;AT5G26930;AT5G56860;AT5G66320;AT2G18380;AT3G50870;AT4G36620
Vc9p318.12	UGT73C6(Vc9p318.12)	TF_motif_seq_0243		644	-	CTATC	GATA; tify	AT1G51600;AT2G45050;AT3G06740;AT3G16870;AT3G21175;AT3G24050;AT3G54810;AT3G60530;AT4G17570;AT4G24470;AT4G26150;AT4G32890;AT4G34680;AT5G25830;AT5G26930;AT5G56860;AT5G66320;AT2G18380;AT3G50870;AT4G36620
Vc9p318.12	UGT73C6(Vc9p318.12)	TF_motif_seq_0243		779	-	TTATC	GATA; tify	AT1G51600;AT2G45050;AT3G06740;AT3G16870;AT3G21175;AT3G24050;AT3G54810;AT3G60530;AT4G17570;AT4G24470;AT4G26150;AT4G32890;AT4G34680;AT5G25830;AT5G26930;AT5G56860;AT5G66320;AT2G18380;AT3G50870;AT4G36620
Vc9p318.12	UGT73C6(Vc9p318.12)	TF_motif_seq_0243		787	+	GATAT	GATA; tify	AT1G51600;AT2G45050;AT3G06740;AT3G16870;AT3G21175;AT3G24050;AT3G54810;AT3G60530;AT4G17570;AT4G24470;AT4G26150;AT4G32890;AT4G34680;AT5G25830;AT5G26930;AT5G56860;AT5G66320;AT2G18380;AT3G50870;AT4G36620
Vc9p318.12	UGT73C6(Vc9p318.12)	TF_motif_seq_0243		908	-	TTATC	GATA; tify	AT1G51600;AT2G45050;AT3G06740;AT3G16870;AT3G21175;AT3G24050;AT3G54810;AT3G60530;AT4G17570;AT4G24470;AT4G26150;AT4G32890;AT4G34680;AT5G25830;AT5G26930;AT5G56860;AT5G66320;AT2G18380;AT3G50870;AT4G36620
Vc9p318.12	UGT73C6(Vc9p318.12)	TF_motif_seq_0243		1147	-	TTATC	GATA; tify	AT1G51600;AT2G45050;AT3G06740;AT3G16870;AT3G21175;AT3G24050;AT3G54810;AT3G60530;AT4G17570;AT4G24470;AT4G26150;AT4G32890;AT4G34680;AT5G25830;AT5G26930;AT5G56860;AT5G66320;AT2G18380;AT3G50870;AT4G36620
Vc9p318.12	UGT73C6(Vc9p318.12)	TF_motif_seq_0243		1152	-	TTATC	GATA; tify	AT1G51600;AT2G45050;AT3G06740;AT3G16870;AT3G21175;AT3G24050;AT3G54810;AT3G60530;AT4G17570;AT4G24470;AT4G26150;AT4G32890;AT4G34680;AT5G25830;AT5G26930;AT5G56860;AT5G66320;AT2G18380;AT3G50870;AT4G36620
Vc9p318.12	UGT73C6(Vc9p318.12)	TF_motif_seq_0243		1255	-	TTATC	GATA; tify	AT1G51600;AT2G45050;AT3G06740;AT3G16870;AT3G21175;AT3G24050;AT3G54810;AT3G60530;AT4G17570;AT4G24470;AT4G26150;AT4G32890;AT4G34680;AT5G25830;AT5G26930;AT5G56860;AT5G66320;AT2G18380;AT3G50870;AT4G36620
Vc9p318.12	UGT73C6(Vc9p318.12)	TF_motif_seq_0243		1276	-	ATATC	GATA; tify	AT1G51600;AT2G45050;AT3G06740;AT3G16870;AT3G21175;AT3G24050;AT3G54810;AT3G60530;AT4G17570;AT4G24470;AT4G26150;AT4G32890;AT4G34680;AT5G25830;AT5G26930;AT5G56860;AT5G66320;AT2G18380;AT3G50870;AT4G36620
Vc9p318.12	UGT73C6(Vc9p318.12)	TF_motif_seq_0243		1345	-	ATATC	GATA; tify	AT1G51600;AT2G45050;AT3G06740;AT3G16870;AT3G21175;AT3G24050;AT3G54810;AT3G60530;AT4G17570;AT4G24470;AT4G26150;AT4G32890;AT4G34680;AT5G25830;AT5G26930;AT5G56860;AT5G66320;AT2G18380;AT3G50870;AT4G36620
Vc9p318.12	UGT73C6(Vc9p318.12)	TF_motif_seq_0243		1378	-	TTATC	GATA; tify	AT1G51600;AT2G45050;AT3G06740;AT3G16870;AT3G21175;AT3G24050;AT3G54810;AT3G60530;AT4G17570;AT4G24470;AT4G26150;AT4G32890;AT4G34680;AT5G25830;AT5G26930;AT5G56860;AT5G66320;AT2G18380;AT3G50870;AT4G36620
Vc9p318.12	UGT73C6(Vc9p318.12)	TF_motif_seq_0243		1432	-	CTATC	GATA; tify	AT1G51600;AT2G45050;AT3G06740;AT3G16870;AT3G21175;AT3G24050;AT3G54810;AT3G60530;AT4G17570;AT4G24470;AT4G26150;AT4G32890;AT4G34680;AT5G25830;AT5G26930;AT5G56860;AT5G66320;AT2G18380;AT3G50870;AT4G36620
Vc9p318.12	UGT73C6(Vc9p318.12)	TF_motif_seq_0243		1611	+	GATAA	GATA; tify	AT1G51600;AT2G45050;AT3G06740;AT3G16870;AT3G21175;AT3G24050;AT3G54810;AT3G60530;AT4G17570;AT4G24470;AT4G26150;AT4G32890;AT4G34680;AT5G25830;AT5G26930;AT5G56860;AT5G66320;AT2G18380;AT3G50870;AT4G36620
Vc9p318.12	UGT73C6(Vc9p318.12)	TF_motif_seq_0243		1718	+	GATAT	GATA; tify	AT1G51600;AT2G45050;AT3G06740;AT3G16870;AT3G21175;AT3G24050;AT3G54810;AT3G60530;AT4G17570;AT4G24470;AT4G26150;AT4G32890;AT4G34680;AT5G25830;AT5G26930;AT5G56860;AT5G66320;AT2G18380;AT3G50870;AT4G36620
Vc9p318.12	UGT73C6(Vc9p318.12)	TF_motif_seq_0243		1719	-	ATATC	GATA; tify	AT1G51600;AT2G45050;AT3G06740;AT3G16870;AT3G21175;AT3G24050;AT3G54810;AT3G60530;AT4G17570;AT4G24470;AT4G26150;AT4G32890;AT4G34680;AT5G25830;AT5G26930;AT5G56860;AT5G66320;AT2G18380;AT3G50870;AT4G36620
Vc9p318.12	UGT73C6(Vc9p318.12)	TF_motif_seq_0243		1724	-	TTATC	GATA; tify	AT1G51600;AT2G45050;AT3G06740;AT3G16870;AT3G21175;AT3G24050;AT3G54810;AT3G60530;AT4G17570;AT4G24470;AT4G26150;AT4G32890;AT4G34680;AT5G25830;AT5G26930;AT5G56860;AT5G66320;AT2G18380;AT3G50870;AT4G36620
Vc9p318.12	UGT73C6(Vc9p318.12)	TF_motif_seq_0244		99	-	CGTAC	SBP	AT2G33810;AT2G47070
Vc9p318.12	UGT73C6(Vc9p318.12)	TF_motif_seq_0244		100	+	GTACA	SBP	AT2G33810;AT2G47070
Vc9p318.12	UGT73C6(Vc9p318.12)	TF_motif_seq_0244		348	-	GGTAC	SBP	AT2G33810;AT2G47070
Vc9p318.12	UGT73C6(Vc9p318.12)	TF_motif_seq_0244		349	+	GTACA	SBP	AT2G33810;AT2G47070
Vc9p318.12	UGT73C6(Vc9p318.12)	TF_motif_seq_0244		373	-	TGTAC	SBP	AT2G33810;AT2G47070
Vc9p318.12	UGT73C6(Vc9p318.12)	TF_motif_seq_0244		374	+	GTACC	SBP	AT2G33810;AT2G47070
Vc9p318.12	UGT73C6(Vc9p318.12)	TF_motif_seq_0244		772	-	TGTAC	SBP	AT2G33810;AT2G47070
Vc9p318.12	UGT73C6(Vc9p318.12)	TF_motif_seq_0244		773	+	GTACT	SBP	AT2G33810;AT2G47070
Vc9p318.12	UGT73C6(Vc9p318.12)	TF_motif_seq_0244		1180	-	AGTAC	SBP	AT2G33810;AT2G47070
Vc9p318.12	UGT73C6(Vc9p318.12)	TF_motif_seq_0244		1181	+	GTACT	SBP	AT2G33810;AT2G47070
Vc9p318.12	UGT73C6(Vc9p318.12)	TF_motif_seq_0244		1704	-	AGTAC	SBP	AT2G33810;AT2G47070
Vc9p318.12	UGT73C6(Vc9p318.12)	TF_motif_seq_0244		1705	+	GTACC	SBP	AT2G33810;AT2G47070
Vc9p318.12	UGT73C6(Vc9p318.12)	TF_motif_seq_0244		1753	-	GGTAC	SBP	AT2G33810;AT2G47070
Vc9p318.12	UGT73C6(Vc9p318.12)	TF_motif_seq_0244		1754	+	GTACG	SBP	AT2G33810;AT2G47070
Vc9p318.12	UGT73C6(Vc9p318.12)	TF_motif_seq_0246		74	+	TGACT	Homeodomain; TALE;TALE	AT1G23380;AT1G62360;AT1G70510;AT4G08150;Os03g0727000;GRMZM2G017087
Vc9p318.12	UGT73C6(Vc9p318.12)	TF_motif_seq_0246		401	-	GGTCA	Homeodomain; TALE;TALE	AT1G23380;AT1G62360;AT1G70510;AT4G08150;Os03g0727000;GRMZM2G017087
Vc9p318.12	UGT73C6(Vc9p318.12)	TF_motif_seq_0246		428	-	CGTCA	Homeodomain; TALE;TALE	AT1G23380;AT1G62360;AT1G70510;AT4G08150;Os03g0727000;GRMZM2G017087
Vc9p318.12	UGT73C6(Vc9p318.12)	TF_motif_seq_0246		544	+	TGACT	Homeodomain; TALE;TALE	AT1G23380;AT1G62360;AT1G70510;AT4G08150;Os03g0727000;GRMZM2G017087
Vc9p318.12	UGT73C6(Vc9p318.12)	TF_motif_seq_0246		656	+	TGACT	Homeodomain; TALE;TALE	AT1G23380;AT1G62360;AT1G70510;AT4G08150;Os03g0727000;GRMZM2G017087
Vc9p318.12	UGT73C6(Vc9p318.12)	TF_motif_seq_0246		1106	+	TGACT	Homeodomain; TALE;TALE	AT1G23380;AT1G62360;AT1G70510;AT4G08150;Os03g0727000;GRMZM2G017087
Vc9p318.12	UGT73C6(Vc9p318.12)	TF_motif_seq_0246		1161	-	TGTCA	Homeodomain; TALE;TALE	AT1G23380;AT1G62360;AT1G70510;AT4G08150;Os03g0727000;GRMZM2G017087
Vc9p318.12	UGT73C6(Vc9p318.12)	TF_motif_seq_0246		1171	-	TGTCA	Homeodomain; TALE;TALE	AT1G23380;AT1G62360;AT1G70510;AT4G08150;Os03g0727000;GRMZM2G017087
Vc9p318.12	UGT73C6(Vc9p318.12)	TF_motif_seq_0246		1391	+	TGACA	Homeodomain; TALE;TALE	AT1G23380;AT1G62360;AT1G70510;AT4G08150;Os03g0727000;GRMZM2G017087
Vc9p318.12	UGT73C6(Vc9p318.12)	TF_motif_seq_0246		1407	+	TGACT	Homeodomain; TALE;TALE	AT1G23380;AT1G62360;AT1G70510;AT4G08150;Os03g0727000;GRMZM2G017087
Vc9p318.12	UGT73C6(Vc9p318.12)	TF_motif_seq_0246		1649	+	TGACT	Homeodomain; TALE;TALE	AT1G23380;AT1G62360;AT1G70510;AT4G08150;Os03g0727000;GRMZM2G017087
Vc9p318.12	UGT73C6(Vc9p318.12)	TF_motif_seq_0246		1668	+	TGACT	Homeodomain; TALE;TALE	AT1G23380;AT1G62360;AT1G70510;AT4G08150;Os03g0727000;GRMZM2G017087
Vc9p318.12	UGT73C6(Vc9p318.12)	TF_motif_seq_0246		1673	-	AGTCA	Homeodomain; TALE;TALE	AT1G23380;AT1G62360;AT1G70510;AT4G08150;Os03g0727000;GRMZM2G017087
Vc9p318.12	UGT73C6(Vc9p318.12)	TF_motif_seq_0246		1814	+	TGACG	Homeodomain; TALE;TALE	AT1G23380;AT1G62360;AT1G70510;AT4G08150;Os03g0727000;GRMZM2G017087
Vc9p318.12	UGT73C6(Vc9p318.12)	TF_motif_seq_0246		1986	-	AGTCA	Homeodomain; TALE;TALE	AT1G23380;AT1G62360;AT1G70510;AT4G08150;Os03g0727000;GRMZM2G017087
Vc9p318.12	UGT73C6(Vc9p318.12)	TF_motif_seq_0251		385	-	CGGGT	TCP	AT3G27010
Vc9p318.12	UGT73C6(Vc9p318.12)	TF_motif_seq_0251		1935	+	GCCCG	TCP	AT3G27010
Vc9p318.12	UGT73C6(Vc9p318.12)	TF_motif_seq_0252		90	-	AATCC	Myb/SANT; MYB; ARR-B;MYB;ARR-B	AT2G01760;AT3G16857;AT4G16110;AT4G18020;AT4G31920;AT5G58080;AT1G67710;AT1G49190;AT2G25180;AT5G49240
Vc9p318.12	UGT73C6(Vc9p318.12)	TF_motif_seq_0252		107	+	AGATT	Myb/SANT; MYB; ARR-B;MYB;ARR-B	AT2G01760;AT3G16857;AT4G16110;AT4G18020;AT4G31920;AT5G58080;AT1G67710;AT1G49190;AT2G25180;AT5G49240
Vc9p318.12	UGT73C6(Vc9p318.12)	TF_motif_seq_0252		366	-	AATCT	Myb/SANT; MYB; ARR-B;MYB;ARR-B	AT2G01760;AT3G16857;AT4G16110;AT4G18020;AT4G31920;AT5G58080;AT1G67710;AT1G49190;AT2G25180;AT5G49240
Vc9p318.12	UGT73C6(Vc9p318.12)	TF_motif_seq_0252		623	+	AGATT	Myb/SANT; MYB; ARR-B;MYB;ARR-B	AT2G01760;AT3G16857;AT4G16110;AT4G18020;AT4G31920;AT5G58080;AT1G67710;AT1G49190;AT2G25180;AT5G49240
Vc9p318.12	UGT73C6(Vc9p318.12)	TF_motif_seq_0252		661	-	AATCT	Myb/SANT; MYB; ARR-B;MYB;ARR-B	AT2G01760;AT3G16857;AT4G16110;AT4G18020;AT4G31920;AT5G58080;AT1G67710;AT1G49190;AT2G25180;AT5G49240
Vc9p318.12	UGT73C6(Vc9p318.12)	TF_motif_seq_0252		691	-	AATCT	Myb/SANT; MYB; ARR-B;MYB;ARR-B	AT2G01760;AT3G16857;AT4G16110;AT4G18020;AT4G31920;AT5G58080;AT1G67710;AT1G49190;AT2G25180;AT5G49240
Vc9p318.12	UGT73C6(Vc9p318.12)	TF_motif_seq_0252		1028	-	AATCT	Myb/SANT; MYB; ARR-B;MYB;ARR-B	AT2G01760;AT3G16857;AT4G16110;AT4G18020;AT4G31920;AT5G58080;AT1G67710;AT1G49190;AT2G25180;AT5G49240
Vc9p318.12	UGT73C6(Vc9p318.12)	TF_motif_seq_0252		1072	-	AATCT	Myb/SANT; MYB; ARR-B;MYB;ARR-B	AT2G01760;AT3G16857;AT4G16110;AT4G18020;AT4G31920;AT5G58080;AT1G67710;AT1G49190;AT2G25180;AT5G49240
Vc9p318.12	UGT73C6(Vc9p318.12)	TF_motif_seq_0252		1099	-	AATCT	Myb/SANT; MYB; ARR-B;MYB;ARR-B	AT2G01760;AT3G16857;AT4G16110;AT4G18020;AT4G31920;AT5G58080;AT1G67710;AT1G49190;AT2G25180;AT5G49240
Vc9p318.12	UGT73C6(Vc9p318.12)	TF_motif_seq_0252		1270	+	GGATT	Myb/SANT; MYB; ARR-B;MYB;ARR-B	AT2G01760;AT3G16857;AT4G16110;AT4G18020;AT4G31920;AT5G58080;AT1G67710;AT1G49190;AT2G25180;AT5G49240
Vc9p318.12	UGT73C6(Vc9p318.12)	TF_motif_seq_0252		1800	-	AATCT	Myb/SANT; MYB; ARR-B;MYB;ARR-B	AT2G01760;AT3G16857;AT4G16110;AT4G18020;AT4G31920;AT5G58080;AT1G67710;AT1G49190;AT2G25180;AT5G49240
Vc9p318.12	UGT73C6(Vc9p318.12)	TF_motif_seq_0254		39	-	TGGAT	AP2; ERF	AT3G14230
Vc9p318.12	UGT73C6(Vc9p318.12)	TF_motif_seq_0254		106	-	AAGAT	AP2; ERF	AT3G14230
Vc9p318.12	UGT73C6(Vc9p318.12)	TF_motif_seq_0254		123	+	ATATA	AP2; ERF	AT3G14230
Vc9p318.12	UGT73C6(Vc9p318.12)	TF_motif_seq_0254		191	-	TAAAT	AP2; ERF	AT3G14230
Vc9p318.12	UGT73C6(Vc9p318.12)	TF_motif_seq_0254		199	-	TTGAT	AP2; ERF	AT3G14230
Vc9p318.12	UGT73C6(Vc9p318.12)	TF_motif_seq_0254		342	-	CAGAT	AP2; ERF	AT3G14230
Vc9p318.12	UGT73C6(Vc9p318.12)	TF_motif_seq_0254		350	-	TACAT	AP2; ERF	AT3G14230
Vc9p318.12	UGT73C6(Vc9p318.12)	TF_motif_seq_0254		367	+	ATCTT	AP2; ERF	AT3G14230
Vc9p318.12	UGT73C6(Vc9p318.12)	TF_motif_seq_0254		474	+	ATCTT	AP2; ERF	AT3G14230
Vc9p318.12	UGT73C6(Vc9p318.12)	TF_motif_seq_0254		486	+	ATTTA	AP2; ERF	AT3G14230
Vc9p318.12	UGT73C6(Vc9p318.12)	TF_motif_seq_0254		524	+	ATCAA	AP2; ERF	AT3G14230
Vc9p318.12	UGT73C6(Vc9p318.12)	TF_motif_seq_0254		530	-	TAGGT	AP2; ERF	AT3G14230
Vc9p318.12	UGT73C6(Vc9p318.12)	TF_motif_seq_0254		534	-	TAGAT	AP2; ERF	AT3G14230
Vc9p318.12	UGT73C6(Vc9p318.12)	TF_motif_seq_0254		591	+	ATCTA	AP2; ERF	AT3G14230
Vc9p318.12	UGT73C6(Vc9p318.12)	TF_motif_seq_0254		594	-	TAGTT	AP2; ERF	AT3G14230
Vc9p318.12	UGT73C6(Vc9p318.12)	TF_motif_seq_0254		622	-	TAGAT	AP2; ERF	AT3G14230
Vc9p318.12	UGT73C6(Vc9p318.12)	TF_motif_seq_0254		625	+	ATTTA	AP2; ERF	AT3G14230
Vc9p318.12	UGT73C6(Vc9p318.12)	TF_motif_seq_0254		628	-	TAGTT	AP2; ERF	AT3G14230
Vc9p318.12	UGT73C6(Vc9p318.12)	TF_motif_seq_0254		637	+	CTCTA	AP2; ERF	AT3G14230
Vc9p318.12	UGT73C6(Vc9p318.12)	TF_motif_seq_0254		642	+	CTCTA	AP2; ERF	AT3G14230
Vc9p318.12	UGT73C6(Vc9p318.12)	TF_motif_seq_0254		646	+	ATCTG	AP2; ERF	AT3G14230
Vc9p318.12	UGT73C6(Vc9p318.12)	TF_motif_seq_0254		662	+	ATCTA	AP2; ERF	AT3G14230
Vc9p318.12	UGT73C6(Vc9p318.12)	TF_motif_seq_0254		667	+	AACTA	AP2; ERF	AT3G14230
Vc9p318.12	UGT73C6(Vc9p318.12)	TF_motif_seq_0254		670	-	TAGTT	AP2; ERF	AT3G14230
Vc9p318.12	UGT73C6(Vc9p318.12)	TF_motif_seq_0254		685	-	TAAAT	AP2; ERF	AT3G14230
Vc9p318.12	UGT73C6(Vc9p318.12)	TF_motif_seq_0254		692	+	ATCTA	AP2; ERF	AT3G14230
Vc9p318.12	UGT73C6(Vc9p318.12)	TF_motif_seq_0254		714	+	CTCTA	AP2; ERF	AT3G14230
Vc9p318.12	UGT73C6(Vc9p318.12)	TF_motif_seq_0254		727	-	TAAAT	AP2; ERF	AT3G14230
Vc9p318.12	UGT73C6(Vc9p318.12)	TF_motif_seq_0254		745	+	ATTTA	AP2; ERF	AT3G14230
Vc9p318.12	UGT73C6(Vc9p318.12)	TF_motif_seq_0254		790	+	ATTTA	AP2; ERF	AT3G14230
Vc9p318.12	UGT73C6(Vc9p318.12)	TF_motif_seq_0254		813	+	CTCTA	AP2; ERF	AT3G14230
Vc9p318.12	UGT73C6(Vc9p318.12)	TF_motif_seq_0254		835	-	TATAT	AP2; ERF	AT3G14230
Vc9p318.12	UGT73C6(Vc9p318.12)	TF_motif_seq_0254		849	+	GTCTA	AP2; ERF	AT3G14230
Vc9p318.12	UGT73C6(Vc9p318.12)	TF_motif_seq_0254		871	+	TTCTA	AP2; ERF	AT3G14230
Vc9p318.12	UGT73C6(Vc9p318.12)	TF_motif_seq_0254		910	+	ATCCA	AP2; ERF	AT3G14230
Vc9p318.12	UGT73C6(Vc9p318.12)	TF_motif_seq_0254		931	+	ATCTA	AP2; ERF	AT3G14230
Vc9p318.12	UGT73C6(Vc9p318.12)	TF_motif_seq_0254		945	-	TTGAT	AP2; ERF	AT3G14230
Vc9p318.12	UGT73C6(Vc9p318.12)	TF_motif_seq_0254		948	+	ATCTC	AP2; ERF	AT3G14230
Vc9p318.12	UGT73C6(Vc9p318.12)	TF_motif_seq_0254		953	+	TTCTA	AP2; ERF	AT3G14230
Vc9p318.12	UGT73C6(Vc9p318.12)	TF_motif_seq_0254		965	+	GTCTA	AP2; ERF	AT3G14230
Vc9p318.12	UGT73C6(Vc9p318.12)	TF_motif_seq_0254		969	+	AACTA	AP2; ERF	AT3G14230
Vc9p318.12	UGT73C6(Vc9p318.12)	TF_motif_seq_0254		972	-	TAGTT	AP2; ERF	AT3G14230
Vc9p318.12	UGT73C6(Vc9p318.12)	TF_motif_seq_0254		987	+	TTCTA	AP2; ERF	AT3G14230
Vc9p318.12	UGT73C6(Vc9p318.12)	TF_motif_seq_0254		1001	+	ATCTT	AP2; ERF	AT3G14230
Vc9p318.12	UGT73C6(Vc9p318.12)	TF_motif_seq_0254		1007	+	CTCTA	AP2; ERF	AT3G14230
Vc9p318.12	UGT73C6(Vc9p318.12)	TF_motif_seq_0254		1011	+	ATTTA	AP2; ERF	AT3G14230
Vc9p318.12	UGT73C6(Vc9p318.12)	TF_motif_seq_0254		1029	+	ATCTA	AP2; ERF	AT3G14230
Vc9p318.12	UGT73C6(Vc9p318.12)	TF_motif_seq_0254		1059	+	TTCTA	AP2; ERF	AT3G14230
Vc9p318.12	UGT73C6(Vc9p318.12)	TF_motif_seq_0254		1062	-	TATAT	AP2; ERF	AT3G14230
Vc9p318.12	UGT73C6(Vc9p318.12)	TF_motif_seq_0254		1068	+	ATTTA	AP2; ERF	AT3G14230
Vc9p318.12	UGT73C6(Vc9p318.12)	TF_motif_seq_0254		1073	+	ATCTC	AP2; ERF	AT3G14230
Vc9p318.12	UGT73C6(Vc9p318.12)	TF_motif_seq_0254		1080	+	ATCTA	AP2; ERF	AT3G14230
Vc9p318.12	UGT73C6(Vc9p318.12)	TF_motif_seq_0254		1100	+	ATCTT	AP2; ERF	AT3G14230
Vc9p318.12	UGT73C6(Vc9p318.12)	TF_motif_seq_0254		1149	+	ATCTT	AP2; ERF	AT3G14230
Vc9p318.12	UGT73C6(Vc9p318.12)	TF_motif_seq_0254		1154	+	ATCTA	AP2; ERF	AT3G14230
Vc9p318.12	UGT73C6(Vc9p318.12)	TF_motif_seq_0254		1157	-	TAGTT	AP2; ERF	AT3G14230
Vc9p318.12	UGT73C6(Vc9p318.12)	TF_motif_seq_0254		1175	+	ATCCA	AP2; ERF	AT3G14230
Vc9p318.12	UGT73C6(Vc9p318.12)	TF_motif_seq_0254		1200	+	TTCTA	AP2; ERF	AT3G14230
Vc9p318.12	UGT73C6(Vc9p318.12)	TF_motif_seq_0254		1214	-	TAGAA	AP2; ERF	AT3G14230
Vc9p318.12	UGT73C6(Vc9p318.12)	TF_motif_seq_0254		1242	+	TTCTA	AP2; ERF	AT3G14230
Vc9p318.12	UGT73C6(Vc9p318.12)	TF_motif_seq_0254		1247	+	ATGTA	AP2; ERF	AT3G14230
Vc9p318.12	UGT73C6(Vc9p318.12)	TF_motif_seq_0254		1257	+	ATCTT	AP2; ERF	AT3G14230
Vc9p318.12	UGT73C6(Vc9p318.12)	TF_motif_seq_0254		1269	-	TGGAT	AP2; ERF	AT3G14230
Vc9p318.12	UGT73C6(Vc9p318.12)	TF_motif_seq_0254		1278	+	ATCTC	AP2; ERF	AT3G14230
Vc9p318.12	UGT73C6(Vc9p318.12)	TF_motif_seq_0254		1290	-	TAAAT	AP2; ERF	AT3G14230
Vc9p318.12	UGT73C6(Vc9p318.12)	TF_motif_seq_0254		1296	+	CTCTA	AP2; ERF	AT3G14230
Vc9p318.12	UGT73C6(Vc9p318.12)	TF_motif_seq_0254		1305	-	TTGAT	AP2; ERF	AT3G14230
Vc9p318.12	UGT73C6(Vc9p318.12)	TF_motif_seq_0254		1320	+	TTCTA	AP2; ERF	AT3G14230
Vc9p318.12	UGT73C6(Vc9p318.12)	TF_motif_seq_0254		1347	+	ATCCA	AP2; ERF	AT3G14230
Vc9p318.12	UGT73C6(Vc9p318.12)	TF_motif_seq_0254		1353	+	ATTTA	AP2; ERF	AT3G14230
Vc9p318.12	UGT73C6(Vc9p318.12)	TF_motif_seq_0254		1365	-	TAAAT	AP2; ERF	AT3G14230
Vc9p318.12	UGT73C6(Vc9p318.12)	TF_motif_seq_0254		1371	+	GTCTA	AP2; ERF	AT3G14230
Vc9p318.12	UGT73C6(Vc9p318.12)	TF_motif_seq_0254		1374	-	TAAAT	AP2; ERF	AT3G14230
Vc9p318.12	UGT73C6(Vc9p318.12)	TF_motif_seq_0254		1380	+	ATCTT	AP2; ERF	AT3G14230
Vc9p318.12	UGT73C6(Vc9p318.12)	TF_motif_seq_0254		1416	+	TTCTA	AP2; ERF	AT3G14230
Vc9p318.12	UGT73C6(Vc9p318.12)	TF_motif_seq_0254		1430	+	AGCTA	AP2; ERF	AT3G14230
Vc9p318.12	UGT73C6(Vc9p318.12)	TF_motif_seq_0254		1434	+	ATCTA	AP2; ERF	AT3G14230
Vc9p318.12	UGT73C6(Vc9p318.12)	TF_motif_seq_0254		1454	-	TAGCT	AP2; ERF	AT3G14230
Vc9p318.12	UGT73C6(Vc9p318.12)	TF_motif_seq_0254		1464	+	AACTA	AP2; ERF	AT3G14230
Vc9p318.12	UGT73C6(Vc9p318.12)	TF_motif_seq_0254		1497	+	AACTA	AP2; ERF	AT3G14230
Vc9p318.12	UGT73C6(Vc9p318.12)	TF_motif_seq_0254		1505	-	TAGTT	AP2; ERF	AT3G14230
Vc9p318.12	UGT73C6(Vc9p318.12)	TF_motif_seq_0254		1515	+	TTCTA	AP2; ERF	AT3G14230
Vc9p318.12	UGT73C6(Vc9p318.12)	TF_motif_seq_0254		1519	+	AACTA	AP2; ERF	AT3G14230
Vc9p318.12	UGT73C6(Vc9p318.12)	TF_motif_seq_0254		1523	+	AACTA	AP2; ERF	AT3G14230
Vc9p318.12	UGT73C6(Vc9p318.12)	TF_motif_seq_0254		1539	+	CTCTA	AP2; ERF	AT3G14230
Vc9p318.12	UGT73C6(Vc9p318.12)	TF_motif_seq_0254		1578	-	TAGAA	AP2; ERF	AT3G14230
Vc9p318.12	UGT73C6(Vc9p318.12)	TF_motif_seq_0254		1581	-	AAGAT	AP2; ERF	AT3G14230
Vc9p318.12	UGT73C6(Vc9p318.12)	TF_motif_seq_0254		1584	+	ATGTA	AP2; ERF	AT3G14230
Vc9p318.12	UGT73C6(Vc9p318.12)	TF_motif_seq_0254		1588	+	ATTTA	AP2; ERF	AT3G14230
Vc9p318.12	UGT73C6(Vc9p318.12)	TF_motif_seq_0254		1603	+	AACTA	AP2; ERF	AT3G14230
Vc9p318.12	UGT73C6(Vc9p318.12)	TF_motif_seq_0254		1609	-	AAGAT	AP2; ERF	AT3G14230
Vc9p318.12	UGT73C6(Vc9p318.12)	TF_motif_seq_0254		1632	+	TTCTA	AP2; ERF	AT3G14230
Vc9p318.12	UGT73C6(Vc9p318.12)	TF_motif_seq_0254		1635	-	TAGGT	AP2; ERF	AT3G14230
Vc9p318.12	UGT73C6(Vc9p318.12)	TF_motif_seq_0254		1653	+	TTCTA	AP2; ERF	AT3G14230
Vc9p318.12	UGT73C6(Vc9p318.12)	TF_motif_seq_0254		1657	+	ACCTA	AP2; ERF	AT3G14230
Vc9p318.12	UGT73C6(Vc9p318.12)	TF_motif_seq_0254		1696	+	TTCTA	AP2; ERF	AT3G14230
Vc9p318.12	UGT73C6(Vc9p318.12)	TF_motif_seq_0254		1699	-	TACAT	AP2; ERF	AT3G14230
Vc9p318.12	UGT73C6(Vc9p318.12)	TF_motif_seq_0254		1710	+	ATCAA	AP2; ERF	AT3G14230
Vc9p318.12	UGT73C6(Vc9p318.12)	TF_motif_seq_0254		1721	+	ATCTT	AP2; ERF	AT3G14230
Vc9p318.12	UGT73C6(Vc9p318.12)	TF_motif_seq_0254		1735	-	AAGAT	AP2; ERF	AT3G14230
Vc9p318.12	UGT73C6(Vc9p318.12)	TF_motif_seq_0254		1747	-	TGGAT	AP2; ERF	AT3G14230
Vc9p318.12	UGT73C6(Vc9p318.12)	TF_motif_seq_0254		1801	+	ATCTC	AP2; ERF	AT3G14230
Vc9p318.12	UGT73C6(Vc9p318.12)	TF_motif_seq_0254		1857	+	ATCAA	AP2; ERF	AT3G14230
Vc9p318.12	UGT73C6(Vc9p318.12)	TF_motif_seq_0255		406	+	CAACA	AP2; RAV; B3	AT1G25560;AT1G13260
Vc9p318.12	UGT73C6(Vc9p318.12)	TF_motif_seq_0255		433	+	CAACA	AP2; RAV; B3	AT1G25560;AT1G13260
Vc9p318.12	UGT73C6(Vc9p318.12)	TF_motif_seq_0255		1394	+	CAACA	AP2; RAV; B3	AT1G25560;AT1G13260
Vc9p318.12	UGT73C6(Vc9p318.12)	TF_motif_seq_0255		1819	+	CAACA	AP2; RAV; B3	AT1G25560;AT1G13260
Vc9p318.12	UGT73C6(Vc9p318.12)	TF_motif_seq_0255		1877	+	CAACA	AP2; RAV; B3	AT1G25560;AT1G13260
Vc9p318.12	UGT73C6(Vc9p318.12)	TF_motif_seq_0256		82	-	GAATG	B3	Os04g0676600;Os08g0101000
Vc9p318.12	UGT73C6(Vc9p318.12)	TF_motif_seq_0256		135	-	GCTTG	B3	Os04g0676600;Os08g0101000
Vc9p318.12	UGT73C6(Vc9p318.12)	TF_motif_seq_0256		338	+	CAAGC	B3	Os04g0676600;Os08g0101000
Vc9p318.12	UGT73C6(Vc9p318.12)	TF_motif_seq_0256		397	-	GAATG	B3	Os04g0676600;Os08g0101000
Vc9p318.12	UGT73C6(Vc9p318.12)	TF_motif_seq_0256		416	+	CATTC	B3	Os04g0676600;Os08g0101000
Vc9p318.12	UGT73C6(Vc9p318.12)	TF_motif_seq_0256		420	+	CATAC	B3	Os04g0676600;Os08g0101000
Vc9p318.12	UGT73C6(Vc9p318.12)	TF_motif_seq_0256		443	+	CATTC	B3	Os04g0676600;Os08g0101000
Vc9p318.12	UGT73C6(Vc9p318.12)	TF_motif_seq_0256		447	+	CACGC	B3	Os04g0676600;Os08g0101000
Vc9p318.12	UGT73C6(Vc9p318.12)	TF_motif_seq_0256		463	+	AATGC	B3	Os04g0676600;Os08g0101000
Vc9p318.12	UGT73C6(Vc9p318.12)	TF_motif_seq_0256		500	+	CCTGC	B3	Os04g0676600;Os08g0101000
Vc9p318.12	UGT73C6(Vc9p318.12)	TF_motif_seq_0256		503	-	GCGTG	B3	Os04g0676600;Os08g0101000
Vc9p318.12	UGT73C6(Vc9p318.12)	TF_motif_seq_0256		797	-	GCAAG	B3	Os04g0676600;Os08g0101000
Vc9p318.12	UGT73C6(Vc9p318.12)	TF_motif_seq_0256		822	+	TATGC	B3	Os04g0676600;Os08g0101000
Vc9p318.12	UGT73C6(Vc9p318.12)	TF_motif_seq_0256		845	-	GTATG	B3	Os04g0676600;Os08g0101000
Vc9p318.12	UGT73C6(Vc9p318.12)	TF_motif_seq_0256		860	-	TCATG	B3	Os04g0676600;Os08g0101000
Vc9p318.12	UGT73C6(Vc9p318.12)	TF_motif_seq_0256		861	+	CATGA	B3	Os04g0676600;Os08g0101000
Vc9p318.12	UGT73C6(Vc9p318.12)	TF_motif_seq_0256		874	+	TATGC	B3	Os04g0676600;Os08g0101000
Vc9p318.12	UGT73C6(Vc9p318.12)	TF_motif_seq_0256		918	-	GCATA	B3	Os04g0676600;Os08g0101000
Vc9p318.12	UGT73C6(Vc9p318.12)	TF_motif_seq_0256		1127	-	GCAAG	B3	Os04g0676600;Os08g0101000
Vc9p318.12	UGT73C6(Vc9p318.12)	TF_motif_seq_0256		1174	+	CATCC	B3	Os04g0676600;Os08g0101000
Vc9p318.12	UGT73C6(Vc9p318.12)	TF_motif_seq_0256		1185	+	TATGC	B3	Os04g0676600;Os08g0101000
Vc9p318.12	UGT73C6(Vc9p318.12)	TF_motif_seq_0256		1249	-	GTATG	B3	Os04g0676600;Os08g0101000
Vc9p318.12	UGT73C6(Vc9p318.12)	TF_motif_seq_0256		1250	+	TATGC	B3	Os04g0676600;Os08g0101000
Vc9p318.12	UGT73C6(Vc9p318.12)	TF_motif_seq_0256		1292	+	AATGC	B3	Os04g0676600;Os08g0101000
Vc9p318.12	UGT73C6(Vc9p318.12)	TF_motif_seq_0256		1487	-	GCATA	B3	Os04g0676600;Os08g0101000
Vc9p318.12	UGT73C6(Vc9p318.12)	TF_motif_seq_0256		1535	+	AATGC	B3	Os04g0676600;Os08g0101000
Vc9p318.12	UGT73C6(Vc9p318.12)	TF_motif_seq_0256		1742	-	GGATG	B3	Os04g0676600;Os08g0101000
Vc9p318.12	UGT73C6(Vc9p318.12)	TF_motif_seq_0256		1808	+	AATGC	B3	Os04g0676600;Os08g0101000
Vc9p318.12	UGT73C6(Vc9p318.12)	TF_motif_seq_0256		1811	-	GCATG	B3	Os04g0676600;Os08g0101000
Vc9p318.12	UGT73C6(Vc9p318.12)	TF_motif_seq_0256		1812	+	CATGA	B3	Os04g0676600;Os08g0101000
Vc9p318.12	UGT73C6(Vc9p318.12)	TF_motif_seq_0256		1837	+	CAAGC	B3	Os04g0676600;Os08g0101000
Vc9p318.12	UGT73C6(Vc9p318.12)	TF_motif_seq_0256		1864	+	CATTC	B3	Os04g0676600;Os08g0101000
Vc9p318.12	UGT73C6(Vc9p318.12)	TF_motif_seq_0256		1929	-	GCATC	B3	Os04g0676600;Os08g0101000
Vc9p318.12	UGT73C6(Vc9p318.12)	TF_motif_seq_0256		1930	+	CATCC	B3	Os04g0676600;Os08g0101000
Vc9p318.12	UGT73C6(Vc9p318.12)	TF_motif_seq_0256		1989	+	CAAGC	B3	Os04g0676600;Os08g0101000
Vc9p318.12	UGT73C6(Vc9p318.12)	TF_motif_seq_0257		15	-	ACTGG	NF-YB;NF-YA;NF-YC	AT1G09030;AT1G17590;AT1G21970;AT1G30500;AT1G54160;AT1G54830;AT1G56170;AT1G72830;AT2G38880;AT2G47810;AT3G05690;AT3G14020;AT3G20910;AT3G53340;AT4G14540;AT5G06510;AT5G12840;AT5G27910;AT5G38140;AT5G47640;AT5G47670;AT5G50470;AT5G50480;Os01g0834400;Os02g0725900;Os05g0463800;Os05g0573500
Vc9p318.12	UGT73C6(Vc9p318.12)	TF_motif_seq_0257		23	-	GTTGG	NF-YB;NF-YA;NF-YC	AT1G09030;AT1G17590;AT1G21970;AT1G30500;AT1G54160;AT1G54830;AT1G56170;AT1G72830;AT2G38880;AT2G47810;AT3G05690;AT3G14020;AT3G20910;AT3G53340;AT4G14540;AT5G06510;AT5G12840;AT5G27910;AT5G38140;AT5G47640;AT5G47670;AT5G50470;AT5G50480;Os01g0834400;Os02g0725900;Os05g0463800;Os05g0573500
Vc9p318.12	UGT73C6(Vc9p318.12)	TF_motif_seq_0257		37	-	AGTGG	NF-YB;NF-YA;NF-YC	AT1G09030;AT1G17590;AT1G21970;AT1G30500;AT1G54160;AT1G54830;AT1G56170;AT1G72830;AT2G38880;AT2G47810;AT3G05690;AT3G14020;AT3G20910;AT3G53340;AT4G14540;AT5G06510;AT5G12840;AT5G27910;AT5G38140;AT5G47640;AT5G47670;AT5G50470;AT5G50480;Os01g0834400;Os02g0725900;Os05g0463800;Os05g0573500
Vc9p318.12	UGT73C6(Vc9p318.12)	TF_motif_seq_0257		60	+	CCAAA	NF-YB;NF-YA;NF-YC	AT1G09030;AT1G17590;AT1G21970;AT1G30500;AT1G54160;AT1G54830;AT1G56170;AT1G72830;AT2G38880;AT2G47810;AT3G05690;AT3G14020;AT3G20910;AT3G53340;AT4G14540;AT5G06510;AT5G12840;AT5G27910;AT5G38140;AT5G47640;AT5G47670;AT5G50470;AT5G50480;Os01g0834400;Os02g0725900;Os05g0463800;Os05g0573500
Vc9p318.12	UGT73C6(Vc9p318.12)	TF_motif_seq_0257		67	+	CCAAA	NF-YB;NF-YA;NF-YC	AT1G09030;AT1G17590;AT1G21970;AT1G30500;AT1G54160;AT1G54830;AT1G56170;AT1G72830;AT2G38880;AT2G47810;AT3G05690;AT3G14020;AT3G20910;AT3G53340;AT4G14540;AT5G06510;AT5G12840;AT5G27910;AT5G38140;AT5G47640;AT5G47670;AT5G50470;AT5G50480;Os01g0834400;Os02g0725900;Os05g0463800;Os05g0573500
Vc9p318.12	UGT73C6(Vc9p318.12)	TF_motif_seq_0257		83	-	AATGG	NF-YB;NF-YA;NF-YC	AT1G09030;AT1G17590;AT1G21970;AT1G30500;AT1G54160;AT1G54830;AT1G56170;AT1G72830;AT2G38880;AT2G47810;AT3G05690;AT3G14020;AT3G20910;AT3G53340;AT4G14540;AT5G06510;AT5G12840;AT5G27910;AT5G38140;AT5G47640;AT5G47670;AT5G50470;AT5G50480;Os01g0834400;Os02g0725900;Os05g0463800;Os05g0573500
Vc9p318.12	UGT73C6(Vc9p318.12)	TF_motif_seq_0257		109	-	ATTGG	NF-YB;NF-YA;NF-YC	AT1G09030;AT1G17590;AT1G21970;AT1G30500;AT1G54160;AT1G54830;AT1G56170;AT1G72830;AT2G38880;AT2G47810;AT3G05690;AT3G14020;AT3G20910;AT3G53340;AT4G14540;AT5G06510;AT5G12840;AT5G27910;AT5G38140;AT5G47640;AT5G47670;AT5G50470;AT5G50480;Os01g0834400;Os02g0725900;Os05g0463800;Os05g0573500
Vc9p318.12	UGT73C6(Vc9p318.12)	TF_motif_seq_0257		128	+	CCGAT	NF-YB;NF-YA;NF-YC	AT1G09030;AT1G17590;AT1G21970;AT1G30500;AT1G54160;AT1G54830;AT1G56170;AT1G72830;AT2G38880;AT2G47810;AT3G05690;AT3G14020;AT3G20910;AT3G53340;AT4G14540;AT5G06510;AT5G12840;AT5G27910;AT5G38140;AT5G47640;AT5G47670;AT5G50470;AT5G50480;Os01g0834400;Os02g0725900;Os05g0463800;Os05g0573500
Vc9p318.12	UGT73C6(Vc9p318.12)	TF_motif_seq_0257		131	-	ATTTG	NF-YB;NF-YA;NF-YC	AT1G09030;AT1G17590;AT1G21970;AT1G30500;AT1G54160;AT1G54830;AT1G56170;AT1G72830;AT2G38880;AT2G47810;AT3G05690;AT3G14020;AT3G20910;AT3G53340;AT4G14540;AT5G06510;AT5G12840;AT5G27910;AT5G38140;AT5G47640;AT5G47670;AT5G50470;AT5G50480;Os01g0834400;Os02g0725900;Os05g0463800;Os05g0573500
Vc9p318.12	UGT73C6(Vc9p318.12)	TF_motif_seq_0257		136	-	CTTGG	NF-YB;NF-YA;NF-YC	AT1G09030;AT1G17590;AT1G21970;AT1G30500;AT1G54160;AT1G54830;AT1G56170;AT1G72830;AT2G38880;AT2G47810;AT3G05690;AT3G14020;AT3G20910;AT3G53340;AT4G14540;AT5G06510;AT5G12840;AT5G27910;AT5G38140;AT5G47640;AT5G47670;AT5G50470;AT5G50480;Os01g0834400;Os02g0725900;Os05g0463800;Os05g0573500
Vc9p318.12	UGT73C6(Vc9p318.12)	TF_motif_seq_0257		146	+	CCACT	NF-YB;NF-YA;NF-YC	AT1G09030;AT1G17590;AT1G21970;AT1G30500;AT1G54160;AT1G54830;AT1G56170;AT1G72830;AT2G38880;AT2G47810;AT3G05690;AT3G14020;AT3G20910;AT3G53340;AT4G14540;AT5G06510;AT5G12840;AT5G27910;AT5G38140;AT5G47640;AT5G47670;AT5G50470;AT5G50480;Os01g0834400;Os02g0725900;Os05g0463800;Os05g0573500
Vc9p318.12	UGT73C6(Vc9p318.12)	TF_motif_seq_0257		151	-	TTTGG	NF-YB;NF-YA;NF-YC	AT1G09030;AT1G17590;AT1G21970;AT1G30500;AT1G54160;AT1G54830;AT1G56170;AT1G72830;AT2G38880;AT2G47810;AT3G05690;AT3G14020;AT3G20910;AT3G53340;AT4G14540;AT5G06510;AT5G12840;AT5G27910;AT5G38140;AT5G47640;AT5G47670;AT5G50470;AT5G50480;Os01g0834400;Os02g0725900;Os05g0463800;Os05g0573500
Vc9p318.12	UGT73C6(Vc9p318.12)	TF_motif_seq_0257		202	-	ATTGA	NF-YB;NF-YA;NF-YC	AT1G09030;AT1G17590;AT1G21970;AT1G30500;AT1G54160;AT1G54830;AT1G56170;AT1G72830;AT2G38880;AT2G47810;AT3G05690;AT3G14020;AT3G20910;AT3G53340;AT4G14540;AT5G06510;AT5G12840;AT5G27910;AT5G38140;AT5G47640;AT5G47670;AT5G50470;AT5G50480;Os01g0834400;Os02g0725900;Os05g0463800;Os05g0573500
Vc9p318.12	UGT73C6(Vc9p318.12)	TF_motif_seq_0257		218	-	TTTGG	NF-YB;NF-YA;NF-YC	AT1G09030;AT1G17590;AT1G21970;AT1G30500;AT1G54160;AT1G54830;AT1G56170;AT1G72830;AT2G38880;AT2G47810;AT3G05690;AT3G14020;AT3G20910;AT3G53340;AT4G14540;AT5G06510;AT5G12840;AT5G27910;AT5G38140;AT5G47640;AT5G47670;AT5G50470;AT5G50480;Os01g0834400;Os02g0725900;Os05g0463800;Os05g0573500
Vc9p318.12	UGT73C6(Vc9p318.12)	TF_motif_seq_0257		242	+	CCAAT	NF-YB;NF-YA;NF-YC	AT1G09030;AT1G17590;AT1G21970;AT1G30500;AT1G54160;AT1G54830;AT1G56170;AT1G72830;AT2G38880;AT2G47810;AT3G05690;AT3G14020;AT3G20910;AT3G53340;AT4G14540;AT5G06510;AT5G12840;AT5G27910;AT5G38140;AT5G47640;AT5G47670;AT5G50470;AT5G50480;Os01g0834400;Os02g0725900;Os05g0463800;Os05g0573500
Vc9p318.12	UGT73C6(Vc9p318.12)	TF_motif_seq_0257		245	-	ATTGA	NF-YB;NF-YA;NF-YC	AT1G09030;AT1G17590;AT1G21970;AT1G30500;AT1G54160;AT1G54830;AT1G56170;AT1G72830;AT2G38880;AT2G47810;AT3G05690;AT3G14020;AT3G20910;AT3G53340;AT4G14540;AT5G06510;AT5G12840;AT5G27910;AT5G38140;AT5G47640;AT5G47670;AT5G50470;AT5G50480;Os01g0834400;Os02g0725900;Os05g0463800;Os05g0573500
Vc9p318.12	UGT73C6(Vc9p318.12)	TF_motif_seq_0257		260	-	TTTGG	NF-YB;NF-YA;NF-YC	AT1G09030;AT1G17590;AT1G21970;AT1G30500;AT1G54160;AT1G54830;AT1G56170;AT1G72830;AT2G38880;AT2G47810;AT3G05690;AT3G14020;AT3G20910;AT3G53340;AT4G14540;AT5G06510;AT5G12840;AT5G27910;AT5G38140;AT5G47640;AT5G47670;AT5G50470;AT5G50480;Os01g0834400;Os02g0725900;Os05g0463800;Os05g0573500
Vc9p318.12	UGT73C6(Vc9p318.12)	TF_motif_seq_0257		277	-	ATTGT	NF-YB;NF-YA;NF-YC	AT1G09030;AT1G17590;AT1G21970;AT1G30500;AT1G54160;AT1G54830;AT1G56170;AT1G72830;AT2G38880;AT2G47810;AT3G05690;AT3G14020;AT3G20910;AT3G53340;AT4G14540;AT5G06510;AT5G12840;AT5G27910;AT5G38140;AT5G47640;AT5G47670;AT5G50470;AT5G50480;Os01g0834400;Os02g0725900;Os05g0463800;Os05g0573500
Vc9p318.12	UGT73C6(Vc9p318.12)	TF_motif_seq_0257		322	+	CCAAA	NF-YB;NF-YA;NF-YC	AT1G09030;AT1G17590;AT1G21970;AT1G30500;AT1G54160;AT1G54830;AT1G56170;AT1G72830;AT2G38880;AT2G47810;AT3G05690;AT3G14020;AT3G20910;AT3G53340;AT4G14540;AT5G06510;AT5G12840;AT5G27910;AT5G38140;AT5G47640;AT5G47670;AT5G50470;AT5G50480;Os01g0834400;Os02g0725900;Os05g0463800;Os05g0573500
Vc9p318.12	UGT73C6(Vc9p318.12)	TF_motif_seq_0257		327	-	AGTGG	NF-YB;NF-YA;NF-YC	AT1G09030;AT1G17590;AT1G21970;AT1G30500;AT1G54160;AT1G54830;AT1G56170;AT1G72830;AT2G38880;AT2G47810;AT3G05690;AT3G14020;AT3G20910;AT3G53340;AT4G14540;AT5G06510;AT5G12840;AT5G27910;AT5G38140;AT5G47640;AT5G47670;AT5G50470;AT5G50480;Os01g0834400;Os02g0725900;Os05g0463800;Os05g0573500
Vc9p318.12	UGT73C6(Vc9p318.12)	TF_motif_seq_0257		337	+	CCAAG	NF-YB;NF-YA;NF-YC	AT1G09030;AT1G17590;AT1G21970;AT1G30500;AT1G54160;AT1G54830;AT1G56170;AT1G72830;AT2G38880;AT2G47810;AT3G05690;AT3G14020;AT3G20910;AT3G53340;AT4G14540;AT5G06510;AT5G12840;AT5G27910;AT5G38140;AT5G47640;AT5G47670;AT5G50470;AT5G50480;Os01g0834400;Os02g0725900;Os05g0463800;Os05g0573500
Vc9p318.12	UGT73C6(Vc9p318.12)	TF_motif_seq_0257		345	-	ATCGG	NF-YB;NF-YA;NF-YC	AT1G09030;AT1G17590;AT1G21970;AT1G30500;AT1G54160;AT1G54830;AT1G56170;AT1G72830;AT2G38880;AT2G47810;AT3G05690;AT3G14020;AT3G20910;AT3G53340;AT4G14540;AT5G06510;AT5G12840;AT5G27910;AT5G38140;AT5G47640;AT5G47670;AT5G50470;AT5G50480;Os01g0834400;Os02g0725900;Os05g0463800;Os05g0573500
Vc9p318.12	UGT73C6(Vc9p318.12)	TF_motif_seq_0257		364	+	CCAAT	NF-YB;NF-YA;NF-YC	AT1G09030;AT1G17590;AT1G21970;AT1G30500;AT1G54160;AT1G54830;AT1G56170;AT1G72830;AT2G38880;AT2G47810;AT3G05690;AT3G14020;AT3G20910;AT3G53340;AT4G14540;AT5G06510;AT5G12840;AT5G27910;AT5G38140;AT5G47640;AT5G47670;AT5G50470;AT5G50480;Os01g0834400;Os02g0725900;Os05g0463800;Os05g0573500
Vc9p318.12	UGT73C6(Vc9p318.12)	TF_motif_seq_0257		398	-	AATGG	NF-YB;NF-YA;NF-YC	AT1G09030;AT1G17590;AT1G21970;AT1G30500;AT1G54160;AT1G54830;AT1G56170;AT1G72830;AT2G38880;AT2G47810;AT3G05690;AT3G14020;AT3G20910;AT3G53340;AT4G14540;AT5G06510;AT5G12840;AT5G27910;AT5G38140;AT5G47640;AT5G47670;AT5G50470;AT5G50480;Os01g0834400;Os02g0725900;Os05g0463800;Os05g0573500
Vc9p318.12	UGT73C6(Vc9p318.12)	TF_motif_seq_0257		458	-	ATTGC	NF-YB;NF-YA;NF-YC	AT1G09030;AT1G17590;AT1G21970;AT1G30500;AT1G54160;AT1G54830;AT1G56170;AT1G72830;AT2G38880;AT2G47810;AT3G05690;AT3G14020;AT3G20910;AT3G53340;AT4G14540;AT5G06510;AT5G12840;AT5G27910;AT5G38140;AT5G47640;AT5G47670;AT5G50470;AT5G50480;Os01g0834400;Os02g0725900;Os05g0463800;Os05g0573500
Vc9p318.12	UGT73C6(Vc9p318.12)	TF_motif_seq_0257		461	+	GCAAT	NF-YB;NF-YA;NF-YC	AT1G09030;AT1G17590;AT1G21970;AT1G30500;AT1G54160;AT1G54830;AT1G56170;AT1G72830;AT2G38880;AT2G47810;AT3G05690;AT3G14020;AT3G20910;AT3G53340;AT4G14540;AT5G06510;AT5G12840;AT5G27910;AT5G38140;AT5G47640;AT5G47670;AT5G50470;AT5G50480;Os01g0834400;Os02g0725900;Os05g0463800;Os05g0573500
Vc9p318.12	UGT73C6(Vc9p318.12)	TF_motif_seq_0257		480	+	GCAAT	NF-YB;NF-YA;NF-YC	AT1G09030;AT1G17590;AT1G21970;AT1G30500;AT1G54160;AT1G54830;AT1G56170;AT1G72830;AT2G38880;AT2G47810;AT3G05690;AT3G14020;AT3G20910;AT3G53340;AT4G14540;AT5G06510;AT5G12840;AT5G27910;AT5G38140;AT5G47640;AT5G47670;AT5G50470;AT5G50480;Os01g0834400;Os02g0725900;Os05g0463800;Os05g0573500
Vc9p318.12	UGT73C6(Vc9p318.12)	TF_motif_seq_0257		492	+	CCAAT	NF-YB;NF-YA;NF-YC	AT1G09030;AT1G17590;AT1G21970;AT1G30500;AT1G54160;AT1G54830;AT1G56170;AT1G72830;AT2G38880;AT2G47810;AT3G05690;AT3G14020;AT3G20910;AT3G53340;AT4G14540;AT5G06510;AT5G12840;AT5G27910;AT5G38140;AT5G47640;AT5G47670;AT5G50470;AT5G50480;Os01g0834400;Os02g0725900;Os05g0463800;Os05g0573500
Vc9p318.12	UGT73C6(Vc9p318.12)	TF_motif_seq_0257		526	+	CAAAT	NF-YB;NF-YA;NF-YC	AT1G09030;AT1G17590;AT1G21970;AT1G30500;AT1G54160;AT1G54830;AT1G56170;AT1G72830;AT2G38880;AT2G47810;AT3G05690;AT3G14020;AT3G20910;AT3G53340;AT4G14540;AT5G06510;AT5G12840;AT5G27910;AT5G38140;AT5G47640;AT5G47670;AT5G50470;AT5G50480;Os01g0834400;Os02g0725900;Os05g0463800;Os05g0573500
Vc9p318.12	UGT73C6(Vc9p318.12)	TF_motif_seq_0257		529	-	ATAGG	NF-YB;NF-YA;NF-YC	AT1G09030;AT1G17590;AT1G21970;AT1G30500;AT1G54160;AT1G54830;AT1G56170;AT1G72830;AT2G38880;AT2G47810;AT3G05690;AT3G14020;AT3G20910;AT3G53340;AT4G14540;AT5G06510;AT5G12840;AT5G27910;AT5G38140;AT5G47640;AT5G47670;AT5G50470;AT5G50480;Os01g0834400;Os02g0725900;Os05g0463800;Os05g0573500
Vc9p318.12	UGT73C6(Vc9p318.12)	TF_motif_seq_0257		556	-	AGTGG	NF-YB;NF-YA;NF-YC	AT1G09030;AT1G17590;AT1G21970;AT1G30500;AT1G54160;AT1G54830;AT1G56170;AT1G72830;AT2G38880;AT2G47810;AT3G05690;AT3G14020;AT3G20910;AT3G53340;AT4G14540;AT5G06510;AT5G12840;AT5G27910;AT5G38140;AT5G47640;AT5G47670;AT5G50470;AT5G50480;Os01g0834400;Os02g0725900;Os05g0463800;Os05g0573500
Vc9p318.12	UGT73C6(Vc9p318.12)	TF_motif_seq_0257		581	+	CAAAT	NF-YB;NF-YA;NF-YC	AT1G09030;AT1G17590;AT1G21970;AT1G30500;AT1G54160;AT1G54830;AT1G56170;AT1G72830;AT2G38880;AT2G47810;AT3G05690;AT3G14020;AT3G20910;AT3G53340;AT4G14540;AT5G06510;AT5G12840;AT5G27910;AT5G38140;AT5G47640;AT5G47670;AT5G50470;AT5G50480;Os01g0834400;Os02g0725900;Os05g0463800;Os05g0573500
Vc9p318.12	UGT73C6(Vc9p318.12)	TF_motif_seq_0257		659	+	CTAAT	NF-YB;NF-YA;NF-YC	AT1G09030;AT1G17590;AT1G21970;AT1G30500;AT1G54160;AT1G54830;AT1G56170;AT1G72830;AT2G38880;AT2G47810;AT3G05690;AT3G14020;AT3G20910;AT3G53340;AT4G14540;AT5G06510;AT5G12840;AT5G27910;AT5G38140;AT5G47640;AT5G47670;AT5G50470;AT5G50480;Os01g0834400;Os02g0725900;Os05g0463800;Os05g0573500
Vc9p318.12	UGT73C6(Vc9p318.12)	TF_motif_seq_0257		698	+	CGAAT	NF-YB;NF-YA;NF-YC	AT1G09030;AT1G17590;AT1G21970;AT1G30500;AT1G54160;AT1G54830;AT1G56170;AT1G72830;AT2G38880;AT2G47810;AT3G05690;AT3G14020;AT3G20910;AT3G53340;AT4G14540;AT5G06510;AT5G12840;AT5G27910;AT5G38140;AT5G47640;AT5G47670;AT5G50470;AT5G50480;Os01g0834400;Os02g0725900;Os05g0463800;Os05g0573500
Vc9p318.12	UGT73C6(Vc9p318.12)	TF_motif_seq_0257		716	+	CTAAT	NF-YB;NF-YA;NF-YC	AT1G09030;AT1G17590;AT1G21970;AT1G30500;AT1G54160;AT1G54830;AT1G56170;AT1G72830;AT2G38880;AT2G47810;AT3G05690;AT3G14020;AT3G20910;AT3G53340;AT4G14540;AT5G06510;AT5G12840;AT5G27910;AT5G38140;AT5G47640;AT5G47670;AT5G50470;AT5G50480;Os01g0834400;Os02g0725900;Os05g0463800;Os05g0573500
Vc9p318.12	UGT73C6(Vc9p318.12)	TF_motif_seq_0257		729	-	AATGG	NF-YB;NF-YA;NF-YC	AT1G09030;AT1G17590;AT1G21970;AT1G30500;AT1G54160;AT1G54830;AT1G56170;AT1G72830;AT2G38880;AT2G47810;AT3G05690;AT3G14020;AT3G20910;AT3G53340;AT4G14540;AT5G06510;AT5G12840;AT5G27910;AT5G38140;AT5G47640;AT5G47670;AT5G50470;AT5G50480;Os01g0834400;Os02g0725900;Os05g0463800;Os05g0573500
Vc9p318.12	UGT73C6(Vc9p318.12)	TF_motif_seq_0257		750	-	ATTTG	NF-YB;NF-YA;NF-YC	AT1G09030;AT1G17590;AT1G21970;AT1G30500;AT1G54160;AT1G54830;AT1G56170;AT1G72830;AT2G38880;AT2G47810;AT3G05690;AT3G14020;AT3G20910;AT3G53340;AT4G14540;AT5G06510;AT5G12840;AT5G27910;AT5G38140;AT5G47640;AT5G47670;AT5G50470;AT5G50480;Os01g0834400;Os02g0725900;Os05g0463800;Os05g0573500
Vc9p318.12	UGT73C6(Vc9p318.12)	TF_motif_seq_0257		751	-	TTTGG	NF-YB;NF-YA;NF-YC	AT1G09030;AT1G17590;AT1G21970;AT1G30500;AT1G54160;AT1G54830;AT1G56170;AT1G72830;AT2G38880;AT2G47810;AT3G05690;AT3G14020;AT3G20910;AT3G53340;AT4G14540;AT5G06510;AT5G12840;AT5G27910;AT5G38140;AT5G47640;AT5G47670;AT5G50470;AT5G50480;Os01g0834400;Os02g0725900;Os05g0463800;Os05g0573500
Vc9p318.12	UGT73C6(Vc9p318.12)	TF_motif_seq_0257		815	+	CTAAT	NF-YB;NF-YA;NF-YC	AT1G09030;AT1G17590;AT1G21970;AT1G30500;AT1G54160;AT1G54830;AT1G56170;AT1G72830;AT2G38880;AT2G47810;AT3G05690;AT3G14020;AT3G20910;AT3G53340;AT4G14540;AT5G06510;AT5G12840;AT5G27910;AT5G38140;AT5G47640;AT5G47670;AT5G50470;AT5G50480;Os01g0834400;Os02g0725900;Os05g0463800;Os05g0573500
Vc9p318.12	UGT73C6(Vc9p318.12)	TF_motif_seq_0257		833	+	CCTAT	NF-YB;NF-YA;NF-YC	AT1G09030;AT1G17590;AT1G21970;AT1G30500;AT1G54160;AT1G54830;AT1G56170;AT1G72830;AT2G38880;AT2G47810;AT3G05690;AT3G14020;AT3G20910;AT3G53340;AT4G14540;AT5G06510;AT5G12840;AT5G27910;AT5G38140;AT5G47640;AT5G47670;AT5G50470;AT5G50480;Os01g0834400;Os02g0725900;Os05g0463800;Os05g0573500
Vc9p318.12	UGT73C6(Vc9p318.12)	TF_motif_seq_0257		841	-	ATTTG	NF-YB;NF-YA;NF-YC	AT1G09030;AT1G17590;AT1G21970;AT1G30500;AT1G54160;AT1G54830;AT1G56170;AT1G72830;AT2G38880;AT2G47810;AT3G05690;AT3G14020;AT3G20910;AT3G53340;AT4G14540;AT5G06510;AT5G12840;AT5G27910;AT5G38140;AT5G47640;AT5G47670;AT5G50470;AT5G50480;Os01g0834400;Os02g0725900;Os05g0463800;Os05g0573500
Vc9p318.12	UGT73C6(Vc9p318.12)	TF_motif_seq_0257		853	+	ACAAT	NF-YB;NF-YA;NF-YC	AT1G09030;AT1G17590;AT1G21970;AT1G30500;AT1G54160;AT1G54830;AT1G56170;AT1G72830;AT2G38880;AT2G47810;AT3G05690;AT3G14020;AT3G20910;AT3G53340;AT4G14540;AT5G06510;AT5G12840;AT5G27910;AT5G38140;AT5G47640;AT5G47670;AT5G50470;AT5G50480;Os01g0834400;Os02g0725900;Os05g0463800;Os05g0573500
Vc9p318.12	UGT73C6(Vc9p318.12)	TF_motif_seq_0257		912	+	CCAAT	NF-YB;NF-YA;NF-YC	AT1G09030;AT1G17590;AT1G21970;AT1G30500;AT1G54160;AT1G54830;AT1G56170;AT1G72830;AT2G38880;AT2G47810;AT3G05690;AT3G14020;AT3G20910;AT3G53340;AT4G14540;AT5G06510;AT5G12840;AT5G27910;AT5G38140;AT5G47640;AT5G47670;AT5G50470;AT5G50480;Os01g0834400;Os02g0725900;Os05g0463800;Os05g0573500
Vc9p318.12	UGT73C6(Vc9p318.12)	TF_motif_seq_0257		914	-	AATGG	NF-YB;NF-YA;NF-YC	AT1G09030;AT1G17590;AT1G21970;AT1G30500;AT1G54160;AT1G54830;AT1G56170;AT1G72830;AT2G38880;AT2G47810;AT3G05690;AT3G14020;AT3G20910;AT3G53340;AT4G14540;AT5G06510;AT5G12840;AT5G27910;AT5G38140;AT5G47640;AT5G47670;AT5G50470;AT5G50480;Os01g0834400;Os02g0725900;Os05g0463800;Os05g0573500
Vc9p318.12	UGT73C6(Vc9p318.12)	TF_motif_seq_0257		933	+	CTAAT	NF-YB;NF-YA;NF-YC	AT1G09030;AT1G17590;AT1G21970;AT1G30500;AT1G54160;AT1G54830;AT1G56170;AT1G72830;AT2G38880;AT2G47810;AT3G05690;AT3G14020;AT3G20910;AT3G53340;AT4G14540;AT5G06510;AT5G12840;AT5G27910;AT5G38140;AT5G47640;AT5G47670;AT5G50470;AT5G50480;Os01g0834400;Os02g0725900;Os05g0463800;Os05g0573500
Vc9p318.12	UGT73C6(Vc9p318.12)	TF_motif_seq_0257		944	-	ATTGA	NF-YB;NF-YA;NF-YC	AT1G09030;AT1G17590;AT1G21970;AT1G30500;AT1G54160;AT1G54830;AT1G56170;AT1G72830;AT2G38880;AT2G47810;AT3G05690;AT3G14020;AT3G20910;AT3G53340;AT4G14540;AT5G06510;AT5G12840;AT5G27910;AT5G38140;AT5G47640;AT5G47670;AT5G50470;AT5G50480;Os01g0834400;Os02g0725900;Os05g0463800;Os05g0573500
Vc9p318.12	UGT73C6(Vc9p318.12)	TF_motif_seq_0257		1016	-	ATTGT	NF-YB;NF-YA;NF-YC	AT1G09030;AT1G17590;AT1G21970;AT1G30500;AT1G54160;AT1G54830;AT1G56170;AT1G72830;AT2G38880;AT2G47810;AT3G05690;AT3G14020;AT3G20910;AT3G53340;AT4G14540;AT5G06510;AT5G12840;AT5G27910;AT5G38140;AT5G47640;AT5G47670;AT5G50470;AT5G50480;Os01g0834400;Os02g0725900;Os05g0463800;Os05g0573500
Vc9p318.12	UGT73C6(Vc9p318.12)	TF_motif_seq_0257		1045	-	ATTAG	NF-YB;NF-YA;NF-YC	AT1G09030;AT1G17590;AT1G21970;AT1G30500;AT1G54160;AT1G54830;AT1G56170;AT1G72830;AT2G38880;AT2G47810;AT3G05690;AT3G14020;AT3G20910;AT3G53340;AT4G14540;AT5G06510;AT5G12840;AT5G27910;AT5G38140;AT5G47640;AT5G47670;AT5G50470;AT5G50480;Os01g0834400;Os02g0725900;Os05g0463800;Os05g0573500
Vc9p318.12	UGT73C6(Vc9p318.12)	TF_motif_seq_0257		1123	-	ATAGG	NF-YB;NF-YA;NF-YC	AT1G09030;AT1G17590;AT1G21970;AT1G30500;AT1G54160;AT1G54830;AT1G56170;AT1G72830;AT2G38880;AT2G47810;AT3G05690;AT3G14020;AT3G20910;AT3G53340;AT4G14540;AT5G06510;AT5G12840;AT5G27910;AT5G38140;AT5G47640;AT5G47670;AT5G50470;AT5G50480;Os01g0834400;Os02g0725900;Os05g0463800;Os05g0573500
Vc9p318.12	UGT73C6(Vc9p318.12)	TF_motif_seq_0257		1169	-	ATTGT	NF-YB;NF-YA;NF-YC	AT1G09030;AT1G17590;AT1G21970;AT1G30500;AT1G54160;AT1G54830;AT1G56170;AT1G72830;AT2G38880;AT2G47810;AT3G05690;AT3G14020;AT3G20910;AT3G53340;AT4G14540;AT5G06510;AT5G12840;AT5G27910;AT5G38140;AT5G47640;AT5G47670;AT5G50470;AT5G50480;Os01g0834400;Os02g0725900;Os05g0463800;Os05g0573500
Vc9p318.12	UGT73C6(Vc9p318.12)	TF_motif_seq_0257		1177	+	CCAAG	NF-YB;NF-YA;NF-YC	AT1G09030;AT1G17590;AT1G21970;AT1G30500;AT1G54160;AT1G54830;AT1G56170;AT1G72830;AT2G38880;AT2G47810;AT3G05690;AT3G14020;AT3G20910;AT3G53340;AT4G14540;AT5G06510;AT5G12840;AT5G27910;AT5G38140;AT5G47640;AT5G47670;AT5G50470;AT5G50480;Os01g0834400;Os02g0725900;Os05g0463800;Os05g0573500
Vc9p318.12	UGT73C6(Vc9p318.12)	TF_motif_seq_0257		1244	+	CTAAT	NF-YB;NF-YA;NF-YC	AT1G09030;AT1G17590;AT1G21970;AT1G30500;AT1G54160;AT1G54830;AT1G56170;AT1G72830;AT2G38880;AT2G47810;AT3G05690;AT3G14020;AT3G20910;AT3G53340;AT4G14540;AT5G06510;AT5G12840;AT5G27910;AT5G38140;AT5G47640;AT5G47670;AT5G50470;AT5G50480;Os01g0834400;Os02g0725900;Os05g0463800;Os05g0573500
Vc9p318.12	UGT73C6(Vc9p318.12)	TF_motif_seq_0257		1303	-	ATTTG	NF-YB;NF-YA;NF-YC	AT1G09030;AT1G17590;AT1G21970;AT1G30500;AT1G54160;AT1G54830;AT1G56170;AT1G72830;AT2G38880;AT2G47810;AT3G05690;AT3G14020;AT3G20910;AT3G53340;AT4G14540;AT5G06510;AT5G12840;AT5G27910;AT5G38140;AT5G47640;AT5G47670;AT5G50470;AT5G50480;Os01g0834400;Os02g0725900;Os05g0463800;Os05g0573500
Vc9p318.12	UGT73C6(Vc9p318.12)	TF_motif_seq_0257		1349	+	CCAAA	NF-YB;NF-YA;NF-YC	AT1G09030;AT1G17590;AT1G21970;AT1G30500;AT1G54160;AT1G54830;AT1G56170;AT1G72830;AT2G38880;AT2G47810;AT3G05690;AT3G14020;AT3G20910;AT3G53340;AT4G14540;AT5G06510;AT5G12840;AT5G27910;AT5G38140;AT5G47640;AT5G47670;AT5G50470;AT5G50480;Os01g0834400;Os02g0725900;Os05g0463800;Os05g0573500
Vc9p318.12	UGT73C6(Vc9p318.12)	TF_motif_seq_0257		1350	+	CAAAT	NF-YB;NF-YA;NF-YC	AT1G09030;AT1G17590;AT1G21970;AT1G30500;AT1G54160;AT1G54830;AT1G56170;AT1G72830;AT2G38880;AT2G47810;AT3G05690;AT3G14020;AT3G20910;AT3G53340;AT4G14540;AT5G06510;AT5G12840;AT5G27910;AT5G38140;AT5G47640;AT5G47670;AT5G50470;AT5G50480;Os01g0834400;Os02g0725900;Os05g0463800;Os05g0573500
Vc9p318.12	UGT73C6(Vc9p318.12)	TF_motif_seq_0257		1476	+	ACAAT	NF-YB;NF-YA;NF-YC	AT1G09030;AT1G17590;AT1G21970;AT1G30500;AT1G54160;AT1G54830;AT1G56170;AT1G72830;AT2G38880;AT2G47810;AT3G05690;AT3G14020;AT3G20910;AT3G53340;AT4G14540;AT5G06510;AT5G12840;AT5G27910;AT5G38140;AT5G47640;AT5G47670;AT5G50470;AT5G50480;Os01g0834400;Os02g0725900;Os05g0463800;Os05g0573500
Vc9p318.12	UGT73C6(Vc9p318.12)	TF_motif_seq_0257		1541	+	CTAAT	NF-YB;NF-YA;NF-YC	AT1G09030;AT1G17590;AT1G21970;AT1G30500;AT1G54160;AT1G54830;AT1G56170;AT1G72830;AT2G38880;AT2G47810;AT3G05690;AT3G14020;AT3G20910;AT3G53340;AT4G14540;AT5G06510;AT5G12840;AT5G27910;AT5G38140;AT5G47640;AT5G47670;AT5G50470;AT5G50480;Os01g0834400;Os02g0725900;Os05g0463800;Os05g0573500
Vc9p318.12	UGT73C6(Vc9p318.12)	TF_motif_seq_0257		1547	+	CCAAA	NF-YB;NF-YA;NF-YC	AT1G09030;AT1G17590;AT1G21970;AT1G30500;AT1G54160;AT1G54830;AT1G56170;AT1G72830;AT2G38880;AT2G47810;AT3G05690;AT3G14020;AT3G20910;AT3G53340;AT4G14540;AT5G06510;AT5G12840;AT5G27910;AT5G38140;AT5G47640;AT5G47670;AT5G50470;AT5G50480;Os01g0834400;Os02g0725900;Os05g0463800;Os05g0573500
Vc9p318.12	UGT73C6(Vc9p318.12)	TF_motif_seq_0257		1677	-	ATTTG	NF-YB;NF-YA;NF-YC	AT1G09030;AT1G17590;AT1G21970;AT1G30500;AT1G54160;AT1G54830;AT1G56170;AT1G72830;AT2G38880;AT2G47810;AT3G05690;AT3G14020;AT3G20910;AT3G53340;AT4G14540;AT5G06510;AT5G12840;AT5G27910;AT5G38140;AT5G47640;AT5G47670;AT5G50470;AT5G50480;Os01g0834400;Os02g0725900;Os05g0463800;Os05g0573500
Vc9p318.12	UGT73C6(Vc9p318.12)	TF_motif_seq_0257		1711	+	TCAAT	NF-YB;NF-YA;NF-YC	AT1G09030;AT1G17590;AT1G21970;AT1G30500;AT1G54160;AT1G54830;AT1G56170;AT1G72830;AT2G38880;AT2G47810;AT3G05690;AT3G14020;AT3G20910;AT3G53340;AT4G14540;AT5G06510;AT5G12840;AT5G27910;AT5G38140;AT5G47640;AT5G47670;AT5G50470;AT5G50480;Os01g0834400;Os02g0725900;Os05g0463800;Os05g0573500
Vc9p318.12	UGT73C6(Vc9p318.12)	TF_motif_seq_0257		1750	-	ATCGG	NF-YB;NF-YA;NF-YC	AT1G09030;AT1G17590;AT1G21970;AT1G30500;AT1G54160;AT1G54830;AT1G56170;AT1G72830;AT2G38880;AT2G47810;AT3G05690;AT3G14020;AT3G20910;AT3G53340;AT4G14540;AT5G06510;AT5G12840;AT5G27910;AT5G38140;AT5G47640;AT5G47670;AT5G50470;AT5G50480;Os01g0834400;Os02g0725900;Os05g0463800;Os05g0573500
Vc9p318.12	UGT73C6(Vc9p318.12)	TF_motif_seq_0257		1768	-	ATTGC	NF-YB;NF-YA;NF-YC	AT1G09030;AT1G17590;AT1G21970;AT1G30500;AT1G54160;AT1G54830;AT1G56170;AT1G72830;AT2G38880;AT2G47810;AT3G05690;AT3G14020;AT3G20910;AT3G53340;AT4G14540;AT5G06510;AT5G12840;AT5G27910;AT5G38140;AT5G47640;AT5G47670;AT5G50470;AT5G50480;Os01g0834400;Os02g0725900;Os05g0463800;Os05g0573500
Vc9p318.12	UGT73C6(Vc9p318.12)	TF_motif_seq_0257		1776	+	CCAAC	NF-YB;NF-YA;NF-YC	AT1G09030;AT1G17590;AT1G21970;AT1G30500;AT1G54160;AT1G54830;AT1G56170;AT1G72830;AT2G38880;AT2G47810;AT3G05690;AT3G14020;AT3G20910;AT3G53340;AT4G14540;AT5G06510;AT5G12840;AT5G27910;AT5G38140;AT5G47640;AT5G47670;AT5G50470;AT5G50480;Os01g0834400;Os02g0725900;Os05g0463800;Os05g0573500
Vc9p318.12	UGT73C6(Vc9p318.12)	TF_motif_seq_0257		1792	+	CCAAA	NF-YB;NF-YA;NF-YC	AT1G09030;AT1G17590;AT1G21970;AT1G30500;AT1G54160;AT1G54830;AT1G56170;AT1G72830;AT2G38880;AT2G47810;AT3G05690;AT3G14020;AT3G20910;AT3G53340;AT4G14540;AT5G06510;AT5G12840;AT5G27910;AT5G38140;AT5G47640;AT5G47670;AT5G50470;AT5G50480;Os01g0834400;Os02g0725900;Os05g0463800;Os05g0573500
Vc9p318.12	UGT73C6(Vc9p318.12)	TF_motif_seq_0257		1854	+	CCAAT	NF-YB;NF-YA;NF-YC	AT1G09030;AT1G17590;AT1G21970;AT1G30500;AT1G54160;AT1G54830;AT1G56170;AT1G72830;AT2G38880;AT2G47810;AT3G05690;AT3G14020;AT3G20910;AT3G53340;AT4G14540;AT5G06510;AT5G12840;AT5G27910;AT5G38140;AT5G47640;AT5G47670;AT5G50470;AT5G50480;Os01g0834400;Os02g0725900;Os05g0463800;Os05g0573500
Vc9p318.12	UGT73C6(Vc9p318.12)	TF_motif_seq_0257		1863	+	CCATT	NF-YB;NF-YA;NF-YC	AT1G09030;AT1G17590;AT1G21970;AT1G30500;AT1G54160;AT1G54830;AT1G56170;AT1G72830;AT2G38880;AT2G47810;AT3G05690;AT3G14020;AT3G20910;AT3G53340;AT4G14540;AT5G06510;AT5G12840;AT5G27910;AT5G38140;AT5G47640;AT5G47670;AT5G50470;AT5G50480;Os01g0834400;Os02g0725900;Os05g0463800;Os05g0573500
Vc9p318.12	UGT73C6(Vc9p318.12)	TF_motif_seq_0257		1870	+	CAAAT	NF-YB;NF-YA;NF-YC	AT1G09030;AT1G17590;AT1G21970;AT1G30500;AT1G54160;AT1G54830;AT1G56170;AT1G72830;AT2G38880;AT2G47810;AT3G05690;AT3G14020;AT3G20910;AT3G53340;AT4G14540;AT5G06510;AT5G12840;AT5G27910;AT5G38140;AT5G47640;AT5G47670;AT5G50470;AT5G50480;Os01g0834400;Os02g0725900;Os05g0463800;Os05g0573500
Vc9p318.12	UGT73C6(Vc9p318.12)	TF_motif_seq_0257		1882	+	CCAAA	NF-YB;NF-YA;NF-YC	AT1G09030;AT1G17590;AT1G21970;AT1G30500;AT1G54160;AT1G54830;AT1G56170;AT1G72830;AT2G38880;AT2G47810;AT3G05690;AT3G14020;AT3G20910;AT3G53340;AT4G14540;AT5G06510;AT5G12840;AT5G27910;AT5G38140;AT5G47640;AT5G47670;AT5G50470;AT5G50480;Os01g0834400;Os02g0725900;Os05g0463800;Os05g0573500
Vc9p318.12	UGT73C6(Vc9p318.12)	TF_motif_seq_0257		1952	+	CAAAT	NF-YB;NF-YA;NF-YC	AT1G09030;AT1G17590;AT1G21970;AT1G30500;AT1G54160;AT1G54830;AT1G56170;AT1G72830;AT2G38880;AT2G47810;AT3G05690;AT3G14020;AT3G20910;AT3G53340;AT4G14540;AT5G06510;AT5G12840;AT5G27910;AT5G38140;AT5G47640;AT5G47670;AT5G50470;AT5G50480;Os01g0834400;Os02g0725900;Os05g0463800;Os05g0573500
Vc9p318.12	UGT73C6(Vc9p318.12)	TF_motif_seq_0257		1992	+	GCAAT	NF-YB;NF-YA;NF-YC	AT1G09030;AT1G17590;AT1G21970;AT1G30500;AT1G54160;AT1G54830;AT1G56170;AT1G72830;AT2G38880;AT2G47810;AT3G05690;AT3G14020;AT3G20910;AT3G53340;AT4G14540;AT5G06510;AT5G12840;AT5G27910;AT5G38140;AT5G47640;AT5G47670;AT5G50470;AT5G50480;Os01g0834400;Os02g0725900;Os05g0463800;Os05g0573500
Vc9p318.12	UGT73C6(Vc9p318.12)	TF_motif_seq_0258		7	-	GTCCG	Dehydrin	U01377
Vc9p318.12	UGT73C6(Vc9p318.12)	TF_motif_seq_0258		9	+	CCGAA	Dehydrin	U01377
Vc9p318.12	UGT73C6(Vc9p318.12)	TF_motif_seq_0258		23	-	GTTGG	Dehydrin	U01377
Vc9p318.12	UGT73C6(Vc9p318.12)	TF_motif_seq_0258		93	+	CCTAC	Dehydrin	U01377
Vc9p318.12	UGT73C6(Vc9p318.12)	TF_motif_seq_0258		128	+	CCGAT	Dehydrin	U01377
Vc9p318.12	UGT73C6(Vc9p318.12)	TF_motif_seq_0258		145	+	CCCAC	Dehydrin	U01377
Vc9p318.12	UGT73C6(Vc9p318.12)	TF_motif_seq_0258		158	+	CCCAC	Dehydrin	U01377
Vc9p318.12	UGT73C6(Vc9p318.12)	TF_motif_seq_0258		211	-	GTGGG	Dehydrin	U01377
Vc9p318.12	UGT73C6(Vc9p318.12)	TF_motif_seq_0258		270	-	CTCGG	Dehydrin	U01377
Vc9p318.12	UGT73C6(Vc9p318.12)	TF_motif_seq_0258		301	-	TTCGG	Dehydrin	U01377
Vc9p318.12	UGT73C6(Vc9p318.12)	TF_motif_seq_0258		328	-	GTGGG	Dehydrin	U01377
Vc9p318.12	UGT73C6(Vc9p318.12)	TF_motif_seq_0258		345	-	ATCGG	Dehydrin	U01377
Vc9p318.12	UGT73C6(Vc9p318.12)	TF_motif_seq_0258		383	-	GTCGG	Dehydrin	U01377
Vc9p318.12	UGT73C6(Vc9p318.12)	TF_motif_seq_0258		424	+	CCGAC	Dehydrin	U01377
Vc9p318.12	UGT73C6(Vc9p318.12)	TF_motif_seq_0258		451	+	CCGAC	Dehydrin	U01377
Vc9p318.12	UGT73C6(Vc9p318.12)	TF_motif_seq_0258		651	-	GTCGC	Dehydrin	U01377
Vc9p318.12	UGT73C6(Vc9p318.12)	TF_motif_seq_0258		655	+	CTGAC	Dehydrin	U01377
Vc9p318.12	UGT73C6(Vc9p318.12)	TF_motif_seq_0258		697	+	CCGAA	Dehydrin	U01377
Vc9p318.12	UGT73C6(Vc9p318.12)	TF_motif_seq_0258		1162	-	GTCAG	Dehydrin	U01377
Vc9p318.12	UGT73C6(Vc9p318.12)	TF_motif_seq_0258		1406	+	CTGAC	Dehydrin	U01377
Vc9p318.12	UGT73C6(Vc9p318.12)	TF_motif_seq_0258		1750	-	ATCGG	Dehydrin	U01377
Vc9p318.12	UGT73C6(Vc9p318.12)	TF_motif_seq_0258		1776	+	CCAAC	Dehydrin	U01377
Vc9p318.12	UGT73C6(Vc9p318.12)	TF_motif_seq_0258		1779	+	ACGAC	Dehydrin	U01377
Vc9p318.12	UGT73C6(Vc9p318.12)	TF_motif_seq_0258		1903	-	CTCGG	Dehydrin	U01377
Vc9p318.12	UGT73C6(Vc9p318.12)	TF_motif_seq_0258		1933	+	CCGCC	Dehydrin	U01377
Vc9p318.12	UGT73C6(Vc9p318.12)	TF_motif_seq_0266		6	+	TGTCC	TCP	Os03g0785800;Os04g0194600;Os12g0616400;Os01g0213800;Os08g0544800;Os11g0175700
Vc9p318.12	UGT73C6(Vc9p318.12)	TF_motif_seq_0266		6	-	TGTCC	TCP	Os03g0785800;Os04g0194600;Os12g0616400;Os01g0213800;Os08g0544800;Os11g0175700
Vc9p318.12	UGT73C6(Vc9p318.12)	TF_motif_seq_0266		18	+	GGACA	TCP	Os03g0785800;Os04g0194600;Os12g0616400;Os01g0213800;Os08g0544800;Os11g0175700
Vc9p318.12	UGT73C6(Vc9p318.12)	TF_motif_seq_0266		18	-	GGACA	TCP	Os03g0785800;Os04g0194600;Os12g0616400;Os01g0213800;Os08g0544800;Os11g0175700
Vc9p318.12	UGT73C6(Vc9p318.12)	TF_motif_seq_0266		64	+	AGACC	TCP	Os03g0785800;Os04g0194600;Os12g0616400;Os01g0213800;Os08g0544800;Os11g0175700
Vc9p318.12	UGT73C6(Vc9p318.12)	TF_motif_seq_0266		64	-	AGACC	TCP	Os03g0785800;Os04g0194600;Os12g0616400;Os01g0213800;Os08g0544800;Os11g0175700
Vc9p318.12	UGT73C6(Vc9p318.12)	TF_motif_seq_0266		112	+	GGGAC	TCP	Os03g0785800;Os04g0194600;Os12g0616400;Os01g0213800;Os08g0544800;Os11g0175700
Vc9p318.12	UGT73C6(Vc9p318.12)	TF_motif_seq_0266		112	-	GGGAC	TCP	Os03g0785800;Os04g0194600;Os12g0616400;Os01g0213800;Os08g0544800;Os11g0175700
Vc9p318.12	UGT73C6(Vc9p318.12)	TF_motif_seq_0266		113	+	GGACC	TCP	Os03g0785800;Os04g0194600;Os12g0616400;Os01g0213800;Os08g0544800;Os11g0175700
Vc9p318.12	UGT73C6(Vc9p318.12)	TF_motif_seq_0266		113	-	GGACC	TCP	Os03g0785800;Os04g0194600;Os12g0616400;Os01g0213800;Os08g0544800;Os11g0175700
Vc9p318.12	UGT73C6(Vc9p318.12)	TF_motif_seq_0266		141	+	GGGAC	TCP	Os03g0785800;Os04g0194600;Os12g0616400;Os01g0213800;Os08g0544800;Os11g0175700
Vc9p318.12	UGT73C6(Vc9p318.12)	TF_motif_seq_0266		141	-	GGGAC	TCP	Os03g0785800;Os04g0194600;Os12g0616400;Os01g0213800;Os08g0544800;Os11g0175700
Vc9p318.12	UGT73C6(Vc9p318.12)	TF_motif_seq_0266		142	+	GGACC	TCP	Os03g0785800;Os04g0194600;Os12g0616400;Os01g0213800;Os08g0544800;Os11g0175700
Vc9p318.12	UGT73C6(Vc9p318.12)	TF_motif_seq_0266		142	-	GGACC	TCP	Os03g0785800;Os04g0194600;Os12g0616400;Os01g0213800;Os08g0544800;Os11g0175700
Vc9p318.12	UGT73C6(Vc9p318.12)	TF_motif_seq_0266		143	+	GACCC	TCP	Os03g0785800;Os04g0194600;Os12g0616400;Os01g0213800;Os08g0544800;Os11g0175700
Vc9p318.12	UGT73C6(Vc9p318.12)	TF_motif_seq_0266		143	-	GACCC	TCP	Os03g0785800;Os04g0194600;Os12g0616400;Os01g0213800;Os08g0544800;Os11g0175700
Vc9p318.12	UGT73C6(Vc9p318.12)	TF_motif_seq_0266		154	+	GGGTC	TCP	Os03g0785800;Os04g0194600;Os12g0616400;Os01g0213800;Os08g0544800;Os11g0175700
Vc9p318.12	UGT73C6(Vc9p318.12)	TF_motif_seq_0266		154	-	GGGTC	TCP	Os03g0785800;Os04g0194600;Os12g0616400;Os01g0213800;Os08g0544800;Os11g0175700
Vc9p318.12	UGT73C6(Vc9p318.12)	TF_motif_seq_0266		155	+	GGTCC	TCP	Os03g0785800;Os04g0194600;Os12g0616400;Os01g0213800;Os08g0544800;Os11g0175700
Vc9p318.12	UGT73C6(Vc9p318.12)	TF_motif_seq_0266		155	-	GGTCC	TCP	Os03g0785800;Os04g0194600;Os12g0616400;Os01g0213800;Os08g0544800;Os11g0175700
Vc9p318.12	UGT73C6(Vc9p318.12)	TF_motif_seq_0266		156	+	GTCCC	TCP	Os03g0785800;Os04g0194600;Os12g0616400;Os01g0213800;Os08g0544800;Os11g0175700
Vc9p318.12	UGT73C6(Vc9p318.12)	TF_motif_seq_0266		156	-	GTCCC	TCP	Os03g0785800;Os04g0194600;Os12g0616400;Os01g0213800;Os08g0544800;Os11g0175700
Vc9p318.12	UGT73C6(Vc9p318.12)	TF_motif_seq_0266		174	+	GAACC	TCP	Os03g0785800;Os04g0194600;Os12g0616400;Os01g0213800;Os08g0544800;Os11g0175700
Vc9p318.12	UGT73C6(Vc9p318.12)	TF_motif_seq_0266		174	-	GAACC	TCP	Os03g0785800;Os04g0194600;Os12g0616400;Os01g0213800;Os08g0544800;Os11g0175700
Vc9p318.12	UGT73C6(Vc9p318.12)	TF_motif_seq_0266		239	+	GGTCC	TCP	Os03g0785800;Os04g0194600;Os12g0616400;Os01g0213800;Os08g0544800;Os11g0175700
Vc9p318.12	UGT73C6(Vc9p318.12)	TF_motif_seq_0266		239	-	GGTCC	TCP	Os03g0785800;Os04g0194600;Os12g0616400;Os01g0213800;Os08g0544800;Os11g0175700
Vc9p318.12	UGT73C6(Vc9p318.12)	TF_motif_seq_0266		264	+	GGGGC	TCP	Os03g0785800;Os04g0194600;Os12g0616400;Os01g0213800;Os08g0544800;Os11g0175700
Vc9p318.12	UGT73C6(Vc9p318.12)	TF_motif_seq_0266		264	-	GGGGC	TCP	Os03g0785800;Os04g0194600;Os12g0616400;Os01g0213800;Os08g0544800;Os11g0175700
Vc9p318.12	UGT73C6(Vc9p318.12)	TF_motif_seq_0266		265	+	GGGCC	TCP	Os03g0785800;Os04g0194600;Os12g0616400;Os01g0213800;Os08g0544800;Os11g0175700
Vc9p318.12	UGT73C6(Vc9p318.12)	TF_motif_seq_0266		265	-	GGGCC	TCP	Os03g0785800;Os04g0194600;Os12g0616400;Os01g0213800;Os08g0544800;Os11g0175700
Vc9p318.12	UGT73C6(Vc9p318.12)	TF_motif_seq_0266		266	+	GGCCC	TCP	Os03g0785800;Os04g0194600;Os12g0616400;Os01g0213800;Os08g0544800;Os11g0175700
Vc9p318.12	UGT73C6(Vc9p318.12)	TF_motif_seq_0266		266	-	GGCCC	TCP	Os03g0785800;Os04g0194600;Os12g0616400;Os01g0213800;Os08g0544800;Os11g0175700
Vc9p318.12	UGT73C6(Vc9p318.12)	TF_motif_seq_0266		299	+	GGTTC	TCP	Os03g0785800;Os04g0194600;Os12g0616400;Os01g0213800;Os08g0544800;Os11g0175700
Vc9p318.12	UGT73C6(Vc9p318.12)	TF_motif_seq_0266		299	-	GGTTC	TCP	Os03g0785800;Os04g0194600;Os12g0616400;Os01g0213800;Os08g0544800;Os11g0175700
Vc9p318.12	UGT73C6(Vc9p318.12)	TF_motif_seq_0266		304	+	GGATC	TCP	Os03g0785800;Os04g0194600;Os12g0616400;Os01g0213800;Os08g0544800;Os11g0175700
Vc9p318.12	UGT73C6(Vc9p318.12)	TF_motif_seq_0266		304	-	GGATC	TCP	Os03g0785800;Os04g0194600;Os12g0616400;Os01g0213800;Os08g0544800;Os11g0175700
Vc9p318.12	UGT73C6(Vc9p318.12)	TF_motif_seq_0266		318	+	AGACC	TCP	Os03g0785800;Os04g0194600;Os12g0616400;Os01g0213800;Os08g0544800;Os11g0175700
Vc9p318.12	UGT73C6(Vc9p318.12)	TF_motif_seq_0266		318	-	AGACC	TCP	Os03g0785800;Os04g0194600;Os12g0616400;Os01g0213800;Os08g0544800;Os11g0175700
Vc9p318.12	UGT73C6(Vc9p318.12)	TF_motif_seq_0266		319	+	GACCC	TCP	Os03g0785800;Os04g0194600;Os12g0616400;Os01g0213800;Os08g0544800;Os11g0175700
Vc9p318.12	UGT73C6(Vc9p318.12)	TF_motif_seq_0266		319	-	GACCC	TCP	Os03g0785800;Os04g0194600;Os12g0616400;Os01g0213800;Os08g0544800;Os11g0175700
Vc9p318.12	UGT73C6(Vc9p318.12)	TF_motif_seq_0266		330	+	GGGTC	TCP	Os03g0785800;Os04g0194600;Os12g0616400;Os01g0213800;Os08g0544800;Os11g0175700
Vc9p318.12	UGT73C6(Vc9p318.12)	TF_motif_seq_0266		330	-	GGGTC	TCP	Os03g0785800;Os04g0194600;Os12g0616400;Os01g0213800;Os08g0544800;Os11g0175700
Vc9p318.12	UGT73C6(Vc9p318.12)	TF_motif_seq_0266		331	+	GGTCC	TCP	Os03g0785800;Os04g0194600;Os12g0616400;Os01g0213800;Os08g0544800;Os11g0175700
Vc9p318.12	UGT73C6(Vc9p318.12)	TF_motif_seq_0266		331	-	GGTCC	TCP	Os03g0785800;Os04g0194600;Os12g0616400;Os01g0213800;Os08g0544800;Os11g0175700
Vc9p318.12	UGT73C6(Vc9p318.12)	TF_motif_seq_0266		332	+	GTCCC	TCP	Os03g0785800;Os04g0194600;Os12g0616400;Os01g0213800;Os08g0544800;Os11g0175700
Vc9p318.12	UGT73C6(Vc9p318.12)	TF_motif_seq_0266		332	-	GTCCC	TCP	Os03g0785800;Os04g0194600;Os12g0616400;Os01g0213800;Os08g0544800;Os11g0175700
Vc9p318.12	UGT73C6(Vc9p318.12)	TF_motif_seq_0266		348	+	GGTAC	TCP	Os03g0785800;Os04g0194600;Os12g0616400;Os01g0213800;Os08g0544800;Os11g0175700
Vc9p318.12	UGT73C6(Vc9p318.12)	TF_motif_seq_0266		348	-	GGTAC	TCP	Os03g0785800;Os04g0194600;Os12g0616400;Os01g0213800;Os08g0544800;Os11g0175700
Vc9p318.12	UGT73C6(Vc9p318.12)	TF_motif_seq_0266		360	+	GGTCC	TCP	Os03g0785800;Os04g0194600;Os12g0616400;Os01g0213800;Os08g0544800;Os11g0175700
Vc9p318.12	UGT73C6(Vc9p318.12)	TF_motif_seq_0266		360	-	GGTCC	TCP	Os03g0785800;Os04g0194600;Os12g0616400;Os01g0213800;Os08g0544800;Os11g0175700
Vc9p318.12	UGT73C6(Vc9p318.12)	TF_motif_seq_0266		361	+	GTCCC	TCP	Os03g0785800;Os04g0194600;Os12g0616400;Os01g0213800;Os08g0544800;Os11g0175700
Vc9p318.12	UGT73C6(Vc9p318.12)	TF_motif_seq_0266		361	-	GTCCC	TCP	Os03g0785800;Os04g0194600;Os12g0616400;Os01g0213800;Os08g0544800;Os11g0175700
Vc9p318.12	UGT73C6(Vc9p318.12)	TF_motif_seq_0266		374	+	GTACC	TCP	Os03g0785800;Os04g0194600;Os12g0616400;Os01g0213800;Os08g0544800;Os11g0175700
Vc9p318.12	UGT73C6(Vc9p318.12)	TF_motif_seq_0266		374	-	GTACC	TCP	Os03g0785800;Os04g0194600;Os12g0616400;Os01g0213800;Os08g0544800;Os11g0175700
Vc9p318.12	UGT73C6(Vc9p318.12)	TF_motif_seq_0266		386	+	GGGTC	TCP	Os03g0785800;Os04g0194600;Os12g0616400;Os01g0213800;Os08g0544800;Os11g0175700
Vc9p318.12	UGT73C6(Vc9p318.12)	TF_motif_seq_0266		386	-	GGGTC	TCP	Os03g0785800;Os04g0194600;Os12g0616400;Os01g0213800;Os08g0544800;Os11g0175700
Vc9p318.12	UGT73C6(Vc9p318.12)	TF_motif_seq_0266		387	+	GGTCC	TCP	Os03g0785800;Os04g0194600;Os12g0616400;Os01g0213800;Os08g0544800;Os11g0175700
Vc9p318.12	UGT73C6(Vc9p318.12)	TF_motif_seq_0266		387	-	GGTCC	TCP	Os03g0785800;Os04g0194600;Os12g0616400;Os01g0213800;Os08g0544800;Os11g0175700
Vc9p318.12	UGT73C6(Vc9p318.12)	TF_motif_seq_0266		388	+	GTCCC	TCP	Os03g0785800;Os04g0194600;Os12g0616400;Os01g0213800;Os08g0544800;Os11g0175700
Vc9p318.12	UGT73C6(Vc9p318.12)	TF_motif_seq_0266		388	-	GTCCC	TCP	Os03g0785800;Os04g0194600;Os12g0616400;Os01g0213800;Os08g0544800;Os11g0175700
Vc9p318.12	UGT73C6(Vc9p318.12)	TF_motif_seq_0266		401	+	GGTCA	TCP	Os03g0785800;Os04g0194600;Os12g0616400;Os01g0213800;Os08g0544800;Os11g0175700
Vc9p318.12	UGT73C6(Vc9p318.12)	TF_motif_seq_0266		401	-	GGTCA	TCP	Os03g0785800;Os04g0194600;Os12g0616400;Os01g0213800;Os08g0544800;Os11g0175700
Vc9p318.12	UGT73C6(Vc9p318.12)	TF_motif_seq_0266		497	+	GATCC	TCP	Os03g0785800;Os04g0194600;Os12g0616400;Os01g0213800;Os08g0544800;Os11g0175700
Vc9p318.12	UGT73C6(Vc9p318.12)	TF_motif_seq_0266		497	-	GATCC	TCP	Os03g0785800;Os04g0194600;Os12g0616400;Os01g0213800;Os08g0544800;Os11g0175700
Vc9p318.12	UGT73C6(Vc9p318.12)	TF_motif_seq_0266		559	+	GGTCC	TCP	Os03g0785800;Os04g0194600;Os12g0616400;Os01g0213800;Os08g0544800;Os11g0175700
Vc9p318.12	UGT73C6(Vc9p318.12)	TF_motif_seq_0266		559	-	GGTCC	TCP	Os03g0785800;Os04g0194600;Os12g0616400;Os01g0213800;Os08g0544800;Os11g0175700
Vc9p318.12	UGT73C6(Vc9p318.12)	TF_motif_seq_0266		650	+	GGTCG	TCP	Os03g0785800;Os04g0194600;Os12g0616400;Os01g0213800;Os08g0544800;Os11g0175700
Vc9p318.12	UGT73C6(Vc9p318.12)	TF_motif_seq_0266		650	-	GGTCG	TCP	Os03g0785800;Os04g0194600;Os12g0616400;Os01g0213800;Os08g0544800;Os11g0175700
Vc9p318.12	UGT73C6(Vc9p318.12)	TF_motif_seq_0266		830	+	CGTCC	TCP	Os03g0785800;Os04g0194600;Os12g0616400;Os01g0213800;Os08g0544800;Os11g0175700
Vc9p318.12	UGT73C6(Vc9p318.12)	TF_motif_seq_0266		830	-	CGTCC	TCP	Os03g0785800;Os04g0194600;Os12g0616400;Os01g0213800;Os08g0544800;Os11g0175700
Vc9p318.12	UGT73C6(Vc9p318.12)	TF_motif_seq_0266		999	+	GGATC	TCP	Os03g0785800;Os04g0194600;Os12g0616400;Os01g0213800;Os08g0544800;Os11g0175700
Vc9p318.12	UGT73C6(Vc9p318.12)	TF_motif_seq_0266		999	-	GGATC	TCP	Os03g0785800;Os04g0194600;Os12g0616400;Os01g0213800;Os08g0544800;Os11g0175700
Vc9p318.12	UGT73C6(Vc9p318.12)	TF_motif_seq_0266		1555	+	GGGGC	TCP	Os03g0785800;Os04g0194600;Os12g0616400;Os01g0213800;Os08g0544800;Os11g0175700
Vc9p318.12	UGT73C6(Vc9p318.12)	TF_motif_seq_0266		1555	-	GGGGC	TCP	Os03g0785800;Os04g0194600;Os12g0616400;Os01g0213800;Os08g0544800;Os11g0175700
Vc9p318.12	UGT73C6(Vc9p318.12)	TF_motif_seq_0266		1556	+	GGGCA	TCP	Os03g0785800;Os04g0194600;Os12g0616400;Os01g0213800;Os08g0544800;Os11g0175700
Vc9p318.12	UGT73C6(Vc9p318.12)	TF_motif_seq_0266		1556	-	GGGCA	TCP	Os03g0785800;Os04g0194600;Os12g0616400;Os01g0213800;Os08g0544800;Os11g0175700
Vc9p318.12	UGT73C6(Vc9p318.12)	TF_motif_seq_0266		1637	+	GGTCT	TCP	Os03g0785800;Os04g0194600;Os12g0616400;Os01g0213800;Os08g0544800;Os11g0175700
Vc9p318.12	UGT73C6(Vc9p318.12)	TF_motif_seq_0266		1637	-	GGTCT	TCP	Os03g0785800;Os04g0194600;Os12g0616400;Os01g0213800;Os08g0544800;Os11g0175700
Vc9p318.12	UGT73C6(Vc9p318.12)	TF_motif_seq_0266		1705	+	GTACC	TCP	Os03g0785800;Os04g0194600;Os12g0616400;Os01g0213800;Os08g0544800;Os11g0175700
Vc9p318.12	UGT73C6(Vc9p318.12)	TF_motif_seq_0266		1705	-	GTACC	TCP	Os03g0785800;Os04g0194600;Os12g0616400;Os01g0213800;Os08g0544800;Os11g0175700
Vc9p318.12	UGT73C6(Vc9p318.12)	TF_motif_seq_0266		1748	+	GGATC	TCP	Os03g0785800;Os04g0194600;Os12g0616400;Os01g0213800;Os08g0544800;Os11g0175700
Vc9p318.12	UGT73C6(Vc9p318.12)	TF_motif_seq_0266		1748	-	GGATC	TCP	Os03g0785800;Os04g0194600;Os12g0616400;Os01g0213800;Os08g0544800;Os11g0175700
Vc9p318.12	UGT73C6(Vc9p318.12)	TF_motif_seq_0266		1753	+	GGTAC	TCP	Os03g0785800;Os04g0194600;Os12g0616400;Os01g0213800;Os08g0544800;Os11g0175700
Vc9p318.12	UGT73C6(Vc9p318.12)	TF_motif_seq_0266		1753	-	GGTAC	TCP	Os03g0785800;Os04g0194600;Os12g0616400;Os01g0213800;Os08g0544800;Os11g0175700
Vc9p318.12	UGT73C6(Vc9p318.12)	TF_motif_seq_0266		1771	+	GCACC	TCP	Os03g0785800;Os04g0194600;Os12g0616400;Os01g0213800;Os08g0544800;Os11g0175700
Vc9p318.12	UGT73C6(Vc9p318.12)	TF_motif_seq_0266		1771	-	GCACC	TCP	Os03g0785800;Os04g0194600;Os12g0616400;Os01g0213800;Os08g0544800;Os11g0175700
Vc9p318.12	UGT73C6(Vc9p318.12)	TF_motif_seq_0266		1934	+	CGCCC	TCP	Os03g0785800;Os04g0194600;Os12g0616400;Os01g0213800;Os08g0544800;Os11g0175700
Vc9p318.12	UGT73C6(Vc9p318.12)	TF_motif_seq_0266		1934	-	CGCCC	TCP	Os03g0785800;Os04g0194600;Os12g0616400;Os01g0213800;Os08g0544800;Os11g0175700
Vc9p318.12	UGT73C6(Vc9p318.12)	TF_motif_seq_0267		51	+	GTTAA	Trihelix	AT5G01380
Vc9p318.12	UGT73C6(Vc9p318.12)	TF_motif_seq_0267		169	+	GATAC	Trihelix	AT5G01380
Vc9p318.12	UGT73C6(Vc9p318.12)	TF_motif_seq_0267		205	-	GAAAC	Trihelix	AT5G01380
Vc9p318.12	UGT73C6(Vc9p318.12)	TF_motif_seq_0267		223	+	TTTAC	Trihelix	AT5G01380
Vc9p318.12	UGT73C6(Vc9p318.12)	TF_motif_seq_0267		348	+	GGTAC	Trihelix	AT5G01380
Vc9p318.12	UGT73C6(Vc9p318.12)	TF_motif_seq_0267		374	-	GTACC	Trihelix	AT5G01380
Vc9p318.12	UGT73C6(Vc9p318.12)	TF_motif_seq_0267		402	+	GTCAC	Trihelix	AT5G01380
Vc9p318.12	UGT73C6(Vc9p318.12)	TF_motif_seq_0267		402	-	GTCAC	Trihelix	AT5G01380
Vc9p318.12	UGT73C6(Vc9p318.12)	TF_motif_seq_0267		429	+	GTCAC	Trihelix	AT5G01380
Vc9p318.12	UGT73C6(Vc9p318.12)	TF_motif_seq_0267		429	-	GTCAC	Trihelix	AT5G01380
Vc9p318.12	UGT73C6(Vc9p318.12)	TF_motif_seq_0267		468	-	GTAAT	Trihelix	AT5G01380
Vc9p318.12	UGT73C6(Vc9p318.12)	TF_motif_seq_0267		543	+	GTGAC	Trihelix	AT5G01380
Vc9p318.12	UGT73C6(Vc9p318.12)	TF_motif_seq_0267		543	-	GTGAC	Trihelix	AT5G01380
Vc9p318.12	UGT73C6(Vc9p318.12)	TF_motif_seq_0267		574	+	TTTAC	Trihelix	AT5G01380
Vc9p318.12	UGT73C6(Vc9p318.12)	TF_motif_seq_0267		606	+	ATTAC	Trihelix	AT5G01380
Vc9p318.12	UGT73C6(Vc9p318.12)	TF_motif_seq_0267		615	+	GTTAT	Trihelix	AT5G01380
Vc9p318.12	UGT73C6(Vc9p318.12)	TF_motif_seq_0267		726	-	GTAAA	Trihelix	AT5G01380
Vc9p318.12	UGT73C6(Vc9p318.12)	TF_motif_seq_0267		801	-	GTAAA	Trihelix	AT5G01380
Vc9p318.12	UGT73C6(Vc9p318.12)	TF_motif_seq_0267		883	+	GTTAA	Trihelix	AT5G01380
Vc9p318.12	UGT73C6(Vc9p318.12)	TF_motif_seq_0267		893	+	GTTTC	Trihelix	AT5G01380
Vc9p318.12	UGT73C6(Vc9p318.12)	TF_motif_seq_0267		902	-	GTAAA	Trihelix	AT5G01380
Vc9p318.12	UGT73C6(Vc9p318.12)	TF_motif_seq_0267		967	-	CTAAC	Trihelix	AT5G01380
Vc9p318.12	UGT73C6(Vc9p318.12)	TF_motif_seq_0267		1035	+	GTTAT	Trihelix	AT5G01380
Vc9p318.12	UGT73C6(Vc9p318.12)	TF_motif_seq_0267		1136	-	ATAAC	Trihelix	AT5G01380
Vc9p318.12	UGT73C6(Vc9p318.12)	TF_motif_seq_0267		1166	+	GTTAT	Trihelix	AT5G01380
Vc9p318.12	UGT73C6(Vc9p318.12)	TF_motif_seq_0267		1322	-	CTAAC	Trihelix	AT5G01380
Vc9p318.12	UGT73C6(Vc9p318.12)	TF_motif_seq_0267		1427	-	GTAAG	Trihelix	AT5G01380
Vc9p318.12	UGT73C6(Vc9p318.12)	TF_motif_seq_0267		1462	-	CTAAC	Trihelix	AT5G01380
Vc9p318.12	UGT73C6(Vc9p318.12)	TF_motif_seq_0267		1473	+	CTTAC	Trihelix	AT5G01380
Vc9p318.12	UGT73C6(Vc9p318.12)	TF_motif_seq_0267		1489	-	ATAAC	Trihelix	AT5G01380
Vc9p318.12	UGT73C6(Vc9p318.12)	TF_motif_seq_0267		1495	-	CTAAC	Trihelix	AT5G01380
Vc9p318.12	UGT73C6(Vc9p318.12)	TF_motif_seq_0267		1507	+	GTTAA	Trihelix	AT5G01380
Vc9p318.12	UGT73C6(Vc9p318.12)	TF_motif_seq_0267		1517	-	CTAAC	Trihelix	AT5G01380
Vc9p318.12	UGT73C6(Vc9p318.12)	TF_motif_seq_0267		1521	-	CTAAC	Trihelix	AT5G01380
Vc9p318.12	UGT73C6(Vc9p318.12)	TF_motif_seq_0267		1533	-	GTAAT	Trihelix	AT5G01380
Vc9p318.12	UGT73C6(Vc9p318.12)	TF_motif_seq_0267		1601	-	CTAAC	Trihelix	AT5G01380
Vc9p318.12	UGT73C6(Vc9p318.12)	TF_motif_seq_0267		1627	-	GTAAT	Trihelix	AT5G01380
Vc9p318.12	UGT73C6(Vc9p318.12)	TF_motif_seq_0267		1667	+	GTGAC	Trihelix	AT5G01380
Vc9p318.12	UGT73C6(Vc9p318.12)	TF_motif_seq_0267		1667	-	GTGAC	Trihelix	AT5G01380
Vc9p318.12	UGT73C6(Vc9p318.12)	TF_motif_seq_0267		1705	-	GTACC	Trihelix	AT5G01380
Vc9p318.12	UGT73C6(Vc9p318.12)	TF_motif_seq_0267		1753	+	GGTAC	Trihelix	AT5G01380
Vc9p318.12	UGT73C6(Vc9p318.12)	TF_motif_seq_0267		1758	-	GTAAA	Trihelix	AT5G01380
Vc9p318.12	UGT73C6(Vc9p318.12)	TF_motif_seq_0267		1806	-	GTAAT	Trihelix	AT5G01380
Vc9p318.12	UGT73C6(Vc9p318.12)	TF_motif_seq_0267		1818	-	GCAAC	Trihelix	AT5G01380
Vc9p318.12	UGT73C6(Vc9p318.12)	TF_motif_seq_0267		1876	-	GCAAC	Trihelix	AT5G01380
Vc9p318.12	UGT73C6(Vc9p318.12)	TF_motif_seq_0267		1908	-	GAAAC	Trihelix	AT5G01380
Vc9p318.12	UGT73C6(Vc9p318.12)	TF_motif_seq_0267		1968	+	GTTTC	Trihelix	AT5G01380
Vc9p318.12	UGT73C6(Vc9p318.12)	TF_motif_seq_0270		74	+	TGACT	WRKY	AT1G13960;AT1G18860;AT1G29280;AT1G29860;AT1G30650;AT1G55600;AT1G62300;AT1G64000;AT1G66550;AT1G68150;AT1G69310;AT1G69810;AT1G80590;AT1G80840;AT2G03340;AT2G23320;AT2G24570;AT2G25000;AT2G30250;AT2G30590;AT2G34830;AT2G37260;AT2G38470;AT2G40740;AT2G40750;AT2G44745;AT2G46130;AT2G46400;AT2G47260;AT3G01080;AT3G01970;AT3G04670;AT3G56400;AT3G58710;AT4G01250;AT4G01720;AT4G04450;AT4G12020;AT4G18170;AT4G22070…
Vc9p318.12	UGT73C6(Vc9p318.12)	TF_motif_seq_0270		401	-	GGTCA	WRKY	AT1G13960;AT1G18860;AT1G29280;AT1G29860;AT1G30650;AT1G55600;AT1G62300;AT1G64000;AT1G66550;AT1G68150;AT1G69310;AT1G69810;AT1G80590;AT1G80840;AT2G03340;AT2G23320;AT2G24570;AT2G25000;AT2G30250;AT2G30590;AT2G34830;AT2G37260;AT2G38470;AT2G40740;AT2G40750;AT2G44745;AT2G46130;AT2G46400;AT2G47260;AT3G01080;AT3G01970;AT3G04670;AT3G56400;AT3G58710;AT4G01250;AT4G01720;AT4G04450;AT4G12020;AT4G18170;AT4G22070…
Vc9p318.12	UGT73C6(Vc9p318.12)	TF_motif_seq_0270		544	+	TGACT	WRKY	AT1G13960;AT1G18860;AT1G29280;AT1G29860;AT1G30650;AT1G55600;AT1G62300;AT1G64000;AT1G66550;AT1G68150;AT1G69310;AT1G69810;AT1G80590;AT1G80840;AT2G03340;AT2G23320;AT2G24570;AT2G25000;AT2G30250;AT2G30590;AT2G34830;AT2G37260;AT2G38470;AT2G40740;AT2G40750;AT2G44745;AT2G46130;AT2G46400;AT2G47260;AT3G01080;AT3G01970;AT3G04670;AT3G56400;AT3G58710;AT4G01250;AT4G01720;AT4G04450;AT4G12020;AT4G18170;AT4G22070…
Vc9p318.12	UGT73C6(Vc9p318.12)	TF_motif_seq_0270		656	+	TGACT	WRKY	AT1G13960;AT1G18860;AT1G29280;AT1G29860;AT1G30650;AT1G55600;AT1G62300;AT1G64000;AT1G66550;AT1G68150;AT1G69310;AT1G69810;AT1G80590;AT1G80840;AT2G03340;AT2G23320;AT2G24570;AT2G25000;AT2G30250;AT2G30590;AT2G34830;AT2G37260;AT2G38470;AT2G40740;AT2G40750;AT2G44745;AT2G46130;AT2G46400;AT2G47260;AT3G01080;AT3G01970;AT3G04670;AT3G56400;AT3G58710;AT4G01250;AT4G01720;AT4G04450;AT4G12020;AT4G18170;AT4G22070…
Vc9p318.12	UGT73C6(Vc9p318.12)	TF_motif_seq_0270		1106	+	TGACT	WRKY	AT1G13960;AT1G18860;AT1G29280;AT1G29860;AT1G30650;AT1G55600;AT1G62300;AT1G64000;AT1G66550;AT1G68150;AT1G69310;AT1G69810;AT1G80590;AT1G80840;AT2G03340;AT2G23320;AT2G24570;AT2G25000;AT2G30250;AT2G30590;AT2G34830;AT2G37260;AT2G38470;AT2G40740;AT2G40750;AT2G44745;AT2G46130;AT2G46400;AT2G47260;AT3G01080;AT3G01970;AT3G04670;AT3G56400;AT3G58710;AT4G01250;AT4G01720;AT4G04450;AT4G12020;AT4G18170;AT4G22070…
Vc9p318.12	UGT73C6(Vc9p318.12)	TF_motif_seq_0270		1407	+	TGACT	WRKY	AT1G13960;AT1G18860;AT1G29280;AT1G29860;AT1G30650;AT1G55600;AT1G62300;AT1G64000;AT1G66550;AT1G68150;AT1G69310;AT1G69810;AT1G80590;AT1G80840;AT2G03340;AT2G23320;AT2G24570;AT2G25000;AT2G30250;AT2G30590;AT2G34830;AT2G37260;AT2G38470;AT2G40740;AT2G40750;AT2G44745;AT2G46130;AT2G46400;AT2G47260;AT3G01080;AT3G01970;AT3G04670;AT3G56400;AT3G58710;AT4G01250;AT4G01720;AT4G04450;AT4G12020;AT4G18170;AT4G22070…
Vc9p318.12	UGT73C6(Vc9p318.12)	TF_motif_seq_0270		1649	+	TGACT	WRKY	AT1G13960;AT1G18860;AT1G29280;AT1G29860;AT1G30650;AT1G55600;AT1G62300;AT1G64000;AT1G66550;AT1G68150;AT1G69310;AT1G69810;AT1G80590;AT1G80840;AT2G03340;AT2G23320;AT2G24570;AT2G25000;AT2G30250;AT2G30590;AT2G34830;AT2G37260;AT2G38470;AT2G40740;AT2G40750;AT2G44745;AT2G46130;AT2G46400;AT2G47260;AT3G01080;AT3G01970;AT3G04670;AT3G56400;AT3G58710;AT4G01250;AT4G01720;AT4G04450;AT4G12020;AT4G18170;AT4G22070…
Vc9p318.12	UGT73C6(Vc9p318.12)	TF_motif_seq_0270		1668	+	TGACT	WRKY	AT1G13960;AT1G18860;AT1G29280;AT1G29860;AT1G30650;AT1G55600;AT1G62300;AT1G64000;AT1G66550;AT1G68150;AT1G69310;AT1G69810;AT1G80590;AT1G80840;AT2G03340;AT2G23320;AT2G24570;AT2G25000;AT2G30250;AT2G30590;AT2G34830;AT2G37260;AT2G38470;AT2G40740;AT2G40750;AT2G44745;AT2G46130;AT2G46400;AT2G47260;AT3G01080;AT3G01970;AT3G04670;AT3G56400;AT3G58710;AT4G01250;AT4G01720;AT4G04450;AT4G12020;AT4G18170;AT4G22070…
Vc9p318.12	UGT73C6(Vc9p318.12)	TF_motif_seq_0270		1673	-	AGTCA	WRKY	AT1G13960;AT1G18860;AT1G29280;AT1G29860;AT1G30650;AT1G55600;AT1G62300;AT1G64000;AT1G66550;AT1G68150;AT1G69310;AT1G69810;AT1G80590;AT1G80840;AT2G03340;AT2G23320;AT2G24570;AT2G25000;AT2G30250;AT2G30590;AT2G34830;AT2G37260;AT2G38470;AT2G40740;AT2G40750;AT2G44745;AT2G46130;AT2G46400;AT2G47260;AT3G01080;AT3G01970;AT3G04670;AT3G56400;AT3G58710;AT4G01250;AT4G01720;AT4G04450;AT4G12020;AT4G18170;AT4G22070…
Vc9p318.12	UGT73C6(Vc9p318.12)	TF_motif_seq_0270		1986	-	AGTCA	WRKY	AT1G13960;AT1G18860;AT1G29280;AT1G29860;AT1G30650;AT1G55600;AT1G62300;AT1G64000;AT1G66550;AT1G68150;AT1G69310;AT1G69810;AT1G80590;AT1G80840;AT2G03340;AT2G23320;AT2G24570;AT2G25000;AT2G30250;AT2G30590;AT2G34830;AT2G37260;AT2G38470;AT2G40740;AT2G40750;AT2G44745;AT2G46130;AT2G46400;AT2G47260;AT3G01080;AT3G01970;AT3G04670;AT3G56400;AT3G58710;AT4G01250;AT4G01720;AT4G04450;AT4G12020;AT4G18170;AT4G22070…
Vc9p318.12	UGT73C6(Vc9p318.12)	TF_motif_seq_0271		74	+	TGACT	bZIP	AT1G77920;AT3G12250;AT5G06950;AT5G06960;AT5G10030;AT5G65210;AT1G22070
Vc9p318.12	UGT73C6(Vc9p318.12)	TF_motif_seq_0271		401	-	GGTCA	bZIP	AT1G77920;AT3G12250;AT5G06950;AT5G06960;AT5G10030;AT5G65210;AT1G22070
Vc9p318.12	UGT73C6(Vc9p318.12)	TF_motif_seq_0271		425	+	CGACG	bZIP	AT1G77920;AT3G12250;AT5G06950;AT5G06960;AT5G10030;AT5G65210;AT1G22070
Vc9p318.12	UGT73C6(Vc9p318.12)	TF_motif_seq_0271		428	-	CGTCA	bZIP	AT1G77920;AT3G12250;AT5G06950;AT5G06960;AT5G10030;AT5G65210;AT1G22070
Vc9p318.12	UGT73C6(Vc9p318.12)	TF_motif_seq_0271		446	+	TCACG	bZIP	AT1G77920;AT3G12250;AT5G06950;AT5G06960;AT5G10030;AT5G65210;AT1G22070
Vc9p318.12	UGT73C6(Vc9p318.12)	TF_motif_seq_0271		452	-	CGACA	bZIP	AT1G77920;AT3G12250;AT5G06950;AT5G06960;AT5G10030;AT5G65210;AT1G22070
Vc9p318.12	UGT73C6(Vc9p318.12)	TF_motif_seq_0271		467	-	CGTAA	bZIP	AT1G77920;AT3G12250;AT5G06950;AT5G06960;AT5G10030;AT5G65210;AT1G22070
Vc9p318.12	UGT73C6(Vc9p318.12)	TF_motif_seq_0271		544	+	TGACT	bZIP	AT1G77920;AT3G12250;AT5G06950;AT5G06960;AT5G10030;AT5G65210;AT1G22070
Vc9p318.12	UGT73C6(Vc9p318.12)	TF_motif_seq_0271		656	+	TGACT	bZIP	AT1G77920;AT3G12250;AT5G06950;AT5G06960;AT5G10030;AT5G65210;AT1G22070
Vc9p318.12	UGT73C6(Vc9p318.12)	TF_motif_seq_0271		830	-	CGTCC	bZIP	AT1G77920;AT3G12250;AT5G06950;AT5G06960;AT5G10030;AT5G65210;AT1G22070
Vc9p318.12	UGT73C6(Vc9p318.12)	TF_motif_seq_0271		1106	+	TGACT	bZIP	AT1G77920;AT3G12250;AT5G06950;AT5G06960;AT5G10030;AT5G65210;AT1G22070
Vc9p318.12	UGT73C6(Vc9p318.12)	TF_motif_seq_0271		1137	+	TAACG	bZIP	AT1G77920;AT3G12250;AT5G06950;AT5G06960;AT5G10030;AT5G65210;AT1G22070
Vc9p318.12	UGT73C6(Vc9p318.12)	TF_motif_seq_0271		1161	-	TGTCA	bZIP	AT1G77920;AT3G12250;AT5G06950;AT5G06960;AT5G10030;AT5G65210;AT1G22070
Vc9p318.12	UGT73C6(Vc9p318.12)	TF_motif_seq_0271		1171	-	TGTCA	bZIP	AT1G77920;AT3G12250;AT5G06950;AT5G06960;AT5G10030;AT5G65210;AT1G22070
Vc9p318.12	UGT73C6(Vc9p318.12)	TF_motif_seq_0271		1266	+	TGATG	bZIP	AT1G77920;AT3G12250;AT5G06950;AT5G06960;AT5G10030;AT5G65210;AT1G22070
Vc9p318.12	UGT73C6(Vc9p318.12)	TF_motif_seq_0271		1306	+	TGATG	bZIP	AT1G77920;AT3G12250;AT5G06950;AT5G06960;AT5G10030;AT5G65210;AT1G22070
Vc9p318.12	UGT73C6(Vc9p318.12)	TF_motif_seq_0271		1391	+	TGACA	bZIP	AT1G77920;AT3G12250;AT5G06950;AT5G06960;AT5G10030;AT5G65210;AT1G22070
Vc9p318.12	UGT73C6(Vc9p318.12)	TF_motif_seq_0271		1407	+	TGACT	bZIP	AT1G77920;AT3G12250;AT5G06950;AT5G06960;AT5G10030;AT5G65210;AT1G22070
Vc9p318.12	UGT73C6(Vc9p318.12)	TF_motif_seq_0271		1457	-	CTTCA	bZIP	AT1G77920;AT3G12250;AT5G06950;AT5G06960;AT5G10030;AT5G65210;AT1G22070
Vc9p318.12	UGT73C6(Vc9p318.12)	TF_motif_seq_0271		1532	-	CGTAA	bZIP	AT1G77920;AT3G12250;AT5G06950;AT5G06960;AT5G10030;AT5G65210;AT1G22070
Vc9p318.12	UGT73C6(Vc9p318.12)	TF_motif_seq_0271		1649	+	TGACT	bZIP	AT1G77920;AT3G12250;AT5G06950;AT5G06960;AT5G10030;AT5G65210;AT1G22070
Vc9p318.12	UGT73C6(Vc9p318.12)	TF_motif_seq_0271		1668	+	TGACT	bZIP	AT1G77920;AT3G12250;AT5G06950;AT5G06960;AT5G10030;AT5G65210;AT1G22070
Vc9p318.12	UGT73C6(Vc9p318.12)	TF_motif_seq_0271		1673	-	AGTCA	bZIP	AT1G77920;AT3G12250;AT5G06950;AT5G06960;AT5G10030;AT5G65210;AT1G22070
Vc9p318.12	UGT73C6(Vc9p318.12)	TF_motif_seq_0271		1709	-	CATCA	bZIP	AT1G77920;AT3G12250;AT5G06950;AT5G06960;AT5G10030;AT5G65210;AT1G22070
Vc9p318.12	UGT73C6(Vc9p318.12)	TF_motif_seq_0271		1733	+	TGAAG	bZIP	AT1G77920;AT3G12250;AT5G06950;AT5G06960;AT5G10030;AT5G65210;AT1G22070
Vc9p318.12	UGT73C6(Vc9p318.12)	TF_motif_seq_0271		1757	-	CGTAA	bZIP	AT1G77920;AT3G12250;AT5G06950;AT5G06960;AT5G10030;AT5G65210;AT1G22070
Vc9p318.12	UGT73C6(Vc9p318.12)	TF_motif_seq_0271		1780	-	CGACA	bZIP	AT1G77920;AT3G12250;AT5G06950;AT5G06960;AT5G10030;AT5G65210;AT1G22070
Vc9p318.12	UGT73C6(Vc9p318.12)	TF_motif_seq_0271		1790	-	CGCCA	bZIP	AT1G77920;AT3G12250;AT5G06950;AT5G06960;AT5G10030;AT5G65210;AT1G22070
Vc9p318.12	UGT73C6(Vc9p318.12)	TF_motif_seq_0271		1805	-	CGTAA	bZIP	AT1G77920;AT3G12250;AT5G06950;AT5G06960;AT5G10030;AT5G65210;AT1G22070
Vc9p318.12	UGT73C6(Vc9p318.12)	TF_motif_seq_0271		1814	+	TGACG	bZIP	AT1G77920;AT3G12250;AT5G06950;AT5G06960;AT5G10030;AT5G65210;AT1G22070
Vc9p318.12	UGT73C6(Vc9p318.12)	TF_motif_seq_0271		1920	-	CCTCA	bZIP	AT1G77920;AT3G12250;AT5G06950;AT5G06960;AT5G10030;AT5G65210;AT1G22070
Vc9p318.12	UGT73C6(Vc9p318.12)	TF_motif_seq_0271		1925	+	AGACG	bZIP	AT1G77920;AT3G12250;AT5G06950;AT5G06960;AT5G10030;AT5G65210;AT1G22070
Vc9p318.12	UGT73C6(Vc9p318.12)	TF_motif_seq_0271		1986	-	AGTCA	bZIP	AT1G77920;AT3G12250;AT5G06950;AT5G06960;AT5G10030;AT5G65210;AT1G22070
Vc9p318.12	UGT73C6(Vc9p318.12)	TF_motif_seq_0281		186	-	aTTCTT	bZIP	AT1G68640
Vc9p318.12	UGT73C6(Vc9p318.12)	TF_motif_seq_0281		286	+	AAGAAt	bZIP	AT1G68640
Vc9p318.12	UGT73C6(Vc9p318.12)	TF_motif_seq_0281		765	-	aTTCTT	bZIP	AT1G68640
Vc9p318.12	UGT73C6(Vc9p318.12)	TF_motif_seq_0281		1333	-	aTTCTT	bZIP	AT1G68640
Vc9p318.12	UGT73C6(Vc9p318.12)	TF_motif_seq_0281		1358	-	aTTCTT	bZIP	AT1G68640
Vc9p318.12	UGT73C6(Vc9p318.12)	TF_motif_seq_0281		1958	-	aTTCTT	bZIP	AT1G68640
Vc9p318.12	UGT73C6(Vc9p318.12)	TF_motif_seq_0282		683	+	AATAAa	Alpha-amylase	M24286;M24287
Vc9p318.12	UGT73C6(Vc9p318.12)	TF_motif_seq_0282		1090	-	tTTATT	Alpha-amylase	M24286;M24287
Vc9p318.12	UGT73C6(Vc9p318.12)	TF_motif_seq_0282		1691	-	tTTATT	Alpha-amylase	M24286;M24287
Vc9p318.12	UGT73C6(Vc9p318.12)	TF_motif_seq_0282		1765	-	tTTATT	Alpha-amylase	M24286;M24287
Vc9p318.12	UGT73C6(Vc9p318.12)	TF_motif_seq_0285		96	+	ACGCGt	CG-1; CAMTA;CAMTA	AT2G22300;AT5G64220;AT1G67310;AT3G16940;AT5G09410
Vc9p318.12	UGT73C6(Vc9p318.12)	TF_motif_seq_0285		96	-	aCGCGT	CG-1; CAMTA;CAMTA	AT2G22300;AT5G64220;AT1G67310;AT3G16940;AT5G09410
Vc9p318.12	UGT73C6(Vc9p318.12)	TF_motif_seq_0292		383	-	GTCGGg	AP2; ERF;ERF	AT1G12610;AT1G63030;AT1G75490;AT3G57600;AT4G25470;AT4G25480;AT4G25490;AT5G05410;AT5G18450;AT5G51990;AT2G38340;AT3G11020;Os08g0565200;Os01g0165000;Os02g0677300;Os03g0174400;Os05g0346200;Os06g0127100;Os01g0968800;Os04g0572400;Os05g0473300;Os06g0165600;Os08g0545500;Os09g0522000;Os09g0522100;Os09g0522200
Vc9p318.12	UGT73C6(Vc9p318.12)	TF_motif_seq_0292		423	+	aCCGAC	AP2; ERF;ERF	AT1G12610;AT1G63030;AT1G75490;AT3G57600;AT4G25470;AT4G25480;AT4G25490;AT5G05410;AT5G18450;AT5G51990;AT2G38340;AT3G11020;Os08g0565200;Os01g0165000;Os02g0677300;Os03g0174400;Os05g0346200;Os06g0127100;Os01g0968800;Os04g0572400;Os05g0473300;Os06g0165600;Os08g0545500;Os09g0522000;Os09g0522100;Os09g0522200
Vc9p318.12	UGT73C6(Vc9p318.12)	TF_motif_seq_0292		450	+	gCCGAC	AP2; ERF;ERF	AT1G12610;AT1G63030;AT1G75490;AT3G57600;AT4G25470;AT4G25480;AT4G25490;AT5G05410;AT5G18450;AT5G51990;AT2G38340;AT3G11020;Os08g0565200;Os01g0165000;Os02g0677300;Os03g0174400;Os05g0346200;Os06g0127100;Os01g0968800;Os04g0572400;Os05g0473300;Os06g0165600;Os08g0545500;Os09g0522000;Os09g0522100;Os09g0522200
Vc9p318.12	UGT73C6(Vc9p318.12)	TF_motif_seq_0300		2	+	AACGTg	bHLH	AT1G09530;AT2G20180;AT4G17880;AT5G46760
Vc9p318.12	UGT73C6(Vc9p318.12)	TF_motif_seq_0300		2	-	aACGTG	bHLH	AT1G09530;AT2G20180;AT4G17880;AT5G46760
Vc9p318.12	UGT73C6(Vc9p318.12)	TF_motif_seq_0300		162	+	CACGAg	bHLH	AT1G09530;AT2G20180;AT4G17880;AT5G46760
Vc9p318.12	UGT73C6(Vc9p318.12)	TF_motif_seq_0300		162	-	cACGAG	bHLH	AT1G09530;AT2G20180;AT4G17880;AT5G46760
Vc9p318.12	UGT73C6(Vc9p318.12)	TF_motif_seq_0300		310	+	CTCGTg	bHLH	AT1G09530;AT2G20180;AT4G17880;AT5G46760
Vc9p318.12	UGT73C6(Vc9p318.12)	TF_motif_seq_0300		310	-	cTCGTG	bHLH	AT1G09530;AT2G20180;AT4G17880;AT5G46760
Vc9p318.12	UGT73C6(Vc9p318.12)	TF_motif_seq_0302		21	+	CAGTTg	bHLH	AT5G08130;AT3G26744
Vc9p318.12	UGT73C6(Vc9p318.12)	TF_motif_seq_0302		21	-	cAGTTG	bHLH	AT5G08130;AT3G26744
Vc9p318.12	UGT73C6(Vc9p318.12)	TF_motif_seq_0302		243	+	CAATTg	bHLH	AT5G08130;AT3G26744
Vc9p318.12	UGT73C6(Vc9p318.12)	TF_motif_seq_0302		243	-	cAATTG	bHLH	AT5G08130;AT3G26744
Vc9p318.12	UGT73C6(Vc9p318.12)	TF_motif_seq_0302		610	+	CAACTg	bHLH	AT5G08130;AT3G26744
Vc9p318.12	UGT73C6(Vc9p318.12)	TF_motif_seq_0302		610	-	cAACTG	bHLH	AT5G08130;AT3G26744
Vc9p318.12	UGT73C6(Vc9p318.12)	TF_motif_seq_0302		1676	+	CATTTg	bHLH	AT5G08130;AT3G26744
Vc9p318.12	UGT73C6(Vc9p318.12)	TF_motif_seq_0302		1676	-	cATTTG	bHLH	AT5G08130;AT3G26744
Vc9p318.12	UGT73C6(Vc9p318.12)	TF_motif_seq_0313		21	+	CAGTTg	(Others)	D14712
Vc9p318.12	UGT73C6(Vc9p318.12)	TF_motif_seq_0313		610	-	cAACTG	(Others)	D14712
Vc9p318.12	UGT73C6(Vc9p318.12)	TF_motif_seq_0313		613	+	CTGTTa	(Others)	D14712
Vc9p318.12	UGT73C6(Vc9p318.12)	TF_motif_seq_0313		881	+	CAGTTa	(Others)	D14712
Vc9p318.12	UGT73C6(Vc9p318.12)	TF_motif_seq_0313		1164	+	CAGTTa	(Others)	D14712
Vc9p318.12	UGT73C6(Vc9p318.12)	TF_motif_seq_0316		426	+	GACGTc	(Others)	L345501
Vc9p318.12	UGT73C6(Vc9p318.12)	TF_motif_seq_0316		426	-	gACGTC	(Others)	L345501
Vc9p318.12	UGT73C6(Vc9p318.12)	TF_motif_seq_0316		828	+	AACGTc	(Others)	L345501
Vc9p318.12	UGT73C6(Vc9p318.12)	TF_motif_seq_0316		828	-	aACGTC	(Others)	L345501
Vc9p318.12	UGT73C6(Vc9p318.12)	TF_motif_seq_0316		1650	+	GACTTc	(Others)	L345501
Vc9p318.12	UGT73C6(Vc9p318.12)	TF_motif_seq_0316		1650	-	gACTTC	(Others)	L345501
Vc9p318.12	UGT73C6(Vc9p318.12)	TF_motif_seq_0319		901	+	GGTAAa	Trihelix	AT1G33240
Vc9p318.12	UGT73C6(Vc9p318.12)	TF_motif_seq_0320		50	+	GGTTAa	MADF; Trihelix	AT1G13450
Vc9p318.12	UGT73C6(Vc9p318.12)	TF_motif_seq_0326		881	-	cAGTTA	(Others)	D14712
Vc9p318.12	UGT73C6(Vc9p318.12)	TF_motif_seq_0326		1164	-	cAGTTA	(Others)	D14712
Vc9p318.12	UGT73C6(Vc9p318.12)	TF_motif_seq_0327		171	+	TACGAa	(Others)	L34551
Vc9p318.12	UGT73C6(Vc9p318.12)	TF_motif_seq_0327		171	-	tACGAA	(Others)	L34551
Vc9p318.12	UGT73C6(Vc9p318.12)	TF_motif_seq_0327		465	+	TGCGTa	(Others)	L34551
Vc9p318.12	UGT73C6(Vc9p318.12)	TF_motif_seq_0327		465	-	tGCGTA	(Others)	L34551
Vc9p318.12	UGT73C6(Vc9p318.12)	TF_motif_seq_0327		530	+	TAGGTa	(Others)	L34551
Vc9p318.12	UGT73C6(Vc9p318.12)	TF_motif_seq_0327		530	-	tAGGTA	(Others)	L34551
Vc9p318.12	UGT73C6(Vc9p318.12)	TF_motif_seq_0327		1328	+	TAAGTa	(Others)	L34551
Vc9p318.12	UGT73C6(Vc9p318.12)	TF_motif_seq_0327		1328	-	tAAGTA	(Others)	L34551
Vc9p318.12	UGT73C6(Vc9p318.12)	TF_motif_seq_0327		1656	+	TACCTa	(Others)	L34551
Vc9p318.12	UGT73C6(Vc9p318.12)	TF_motif_seq_0327		1656	-	tACCTA	(Others)	L34551
Vc9p318.12	UGT73C6(Vc9p318.12)	TF_motif_seq_0327		1699	+	TACATa	(Others)	L34551
Vc9p318.12	UGT73C6(Vc9p318.12)	TF_motif_seq_0327		1699	-	tACATA	(Others)	L34551
Vc9p318.12	UGT73C6(Vc9p318.12)	TF_motif_seq_0327		1755	+	TACGTa	(Others)	L34551
Vc9p318.12	UGT73C6(Vc9p318.12)	TF_motif_seq_0327		1755	-	tACGTA	(Others)	L34551
Vc9p318.12	UGT73C6(Vc9p318.12)	TF_motif_seq_0331		384	+	tCGGGT	TCP	AT3G27010
Vc9p318.12	UGT73C6(Vc9p318.12)	TF_motif_seq_0339		73	+	TTGACt	WRKY	AT1G13960;AT1G18860;AT1G29280;AT1G29860;AT1G30650;AT1G55600;AT1G62300;AT1G64000;AT1G66550;AT1G68150;AT1G69310;AT1G69810;AT1G80590;AT1G80840;AT2G03340;AT2G23320;AT2G24570;AT2G25000;AT2G30250;AT2G30590;AT2G34830;AT2G37260;AT2G38470;AT2G40740;AT2G40750;AT2G44745;AT2G46130;AT2G46400;AT2G47260;AT3G01080;AT3G01970;AT3G04670;AT3G56400;AT3G58710;AT4G01250;AT4G01720;AT4G04450;AT4G12020;AT4G18170;AT4G22070…
Vc9p318.12	UGT73C6(Vc9p318.12)	TF_motif_seq_0339		1390	+	TTGACa	WRKY	AT1G13960;AT1G18860;AT1G29280;AT1G29860;AT1G30650;AT1G55600;AT1G62300;AT1G64000;AT1G66550;AT1G68150;AT1G69310;AT1G69810;AT1G80590;AT1G80840;AT2G03340;AT2G23320;AT2G24570;AT2G25000;AT2G30250;AT2G30590;AT2G34830;AT2G37260;AT2G38470;AT2G40740;AT2G40750;AT2G44745;AT2G46130;AT2G46400;AT2G47260;AT3G01080;AT3G01970;AT3G04670;AT3G56400;AT3G58710;AT4G01250;AT4G01720;AT4G04450;AT4G12020;AT4G18170;AT4G22070…
Vc9p318.12	UGT73C6(Vc9p318.12)	TF_motif_seq_0339		1986	-	aGTCAA	WRKY	AT1G13960;AT1G18860;AT1G29280;AT1G29860;AT1G30650;AT1G55600;AT1G62300;AT1G64000;AT1G66550;AT1G68150;AT1G69310;AT1G69810;AT1G80590;AT1G80840;AT2G03340;AT2G23320;AT2G24570;AT2G25000;AT2G30250;AT2G30590;AT2G34830;AT2G37260;AT2G38470;AT2G40740;AT2G40750;AT2G44745;AT2G46130;AT2G46400;AT2G47260;AT3G01080;AT3G01970;AT3G04670;AT3G56400;AT3G58710;AT4G01250;AT4G01720;AT4G04450;AT4G12020;AT4G18170;AT4G22070…
Vc9p318.12	UGT73C6(Vc9p318.12)	TF_motif_seq_0347		687	+	AATTAat	Alpha-amylase	M24286;M24287
Vc9p318.12	UGT73C6(Vc9p318.12)	TF_motif_seq_0347		746	-	ttTAATT	Alpha-amylase	M24286;M24287
Vc9p318.12	UGT73C6(Vc9p318.12)	TF_motif_seq_0347		932	-	tcTAATT	Alpha-amylase	M24286;M24287
Vc9p318.12	UGT73C6(Vc9p318.12)	TF_motif_seq_0347		1012	-	ttTAATT	Alpha-amylase	M24286;M24287
Vc9p318.12	UGT73C6(Vc9p318.12)	TF_motif_seq_0347		1191	-	ctTAATT	Alpha-amylase	M24286;M24287
Vc9p318.12	UGT73C6(Vc9p318.12)	TF_motif_seq_0347		1354	-	ttTAATT	Alpha-amylase	M24286;M24287
Vc9p318.12	UGT73C6(Vc9p318.12)	TF_motif_seq_0347		1410	-	ctTAATT	Alpha-amylase	M24286;M24287
Vc9p318.12	UGT73C6(Vc9p318.12)	TF_motif_seq_0347		1507	-	gtTAATT	Alpha-amylase	M24286;M24287
Vc9p318.12	UGT73C6(Vc9p318.12)	TF_motif_seq_0347		1626	-	tgTAATT	Alpha-amylase	M24286;M24287
Vc9p318.12	UGT73C6(Vc9p318.12)	TF_motif_seq_0347		1994	+	AATTAta	Alpha-amylase	M24286;M24287
Vc9p318.12	UGT73C6(Vc9p318.12)	TF_motif_seq_0349		423	+	ACCGAcg	(Others)	X67670;X67671
Vc9p318.12	UGT73C6(Vc9p318.12)	TF_motif_seq_0349		450	+	GCCGAca	(Others)	X67670;X67671
Vc9p318.12	UGT73C6(Vc9p318.12)	TF_motif_seq_0349		1161	-	tgTCAGT	(Others)	X67670;X67671
Vc9p318.12	UGT73C6(Vc9p318.12)	TF_motif_seq_0349		1778	+	AACGAca	(Others)	X67670;X67671
Vc9p318.12	UGT73C6(Vc9p318.12)	TF_motif_seq_0355		641	+	ACTCTat	SRS	AT1G75520;AT2G18120;AT3G54430;AT4G36260;AT5G12330;AT5G66350
Vc9p318.12	UGT73C6(Vc9p318.12)	TF_motif_seq_0355		888	-	gaAGAGT	SRS	AT1G75520;AT2G18120;AT3G54430;AT4G36260;AT5G12330;AT5G66350
Vc9p318.12	UGT73C6(Vc9p318.12)	TF_motif_seq_0376		1032	-	taTGTTA	Myb/SANT; MYB	Os01g0812000
Vc9p318.12	UGT73C6(Vc9p318.12)	TF_motif_seq_0379		612	-	acTGTTA	Alpha-amylase	X16509
Vc9p318.12	UGT73C6(Vc9p318.12)	TF_motif_seq_0379		1032	-	taTGTTA	Alpha-amylase	X16509
Vc9p318.12	UGT73C6(Vc9p318.12)	TF_motif_seq_0386		38	-	gtGGATA	Alpha-amylase	X16509
Vc9p318.12	UGT73C6(Vc9p318.12)	TF_motif_seq_0386		909	+	TATCCaa	Alpha-amylase	X16509
Vc9p318.12	UGT73C6(Vc9p318.12)	TF_motif_seq_0386		1346	+	TATCCaa	Alpha-amylase	X16509
Vc9p318.12	UGT73C6(Vc9p318.12)	TF_motif_seq_0394		222	-	gtTTACA	(Others)	U82230
Vc9p318.12	UGT73C6(Vc9p318.12)	TF_motif_seq_0394		725	+	TGTAAat	(Others)	U82230
Vc9p318.12	UGT73C6(Vc9p318.12)	TF_motif_seq_0396		1270	-	ggATTAA	WOX	AT2G17950
Vc9p318.12	UGT73C6(Vc9p318.12)	TF_motif_seq_0398		1296	-	ctCTAAA	MYB-related	GRMZM2G136887
Vc9p318.12	UGT73C6(Vc9p318.12)	TF_motif_seq_0398		1972	-	caCTAAA	MYB-related	GRMZM2G136887
Vc9p318.12	UGT73C6(Vc9p318.12)	TF_motif_seq_0410		1	+	AAACGtgt	bHLH	AT1G32640
Vc9p318.12	UGT73C6(Vc9p318.12)	TF_motif_seq_0410		1	-	aaaCGTGT	bHLH	AT1G32640
Vc9p318.12	UGT73C6(Vc9p318.12)	TF_motif_seq_0410		94	+	CTACGcgt	bHLH	AT1G32640
Vc9p318.12	UGT73C6(Vc9p318.12)	TF_motif_seq_0410		96	-	acgCGTAC	bHLH	AT1G32640
Vc9p318.12	UGT73C6(Vc9p318.12)	TF_motif_seq_0410		904	-	aaaCTTAT	bHLH	AT1G32640
Vc9p318.12	UGT73C6(Vc9p318.12)	TF_motif_seq_0410		1582	-	agaTGTAT	bHLH	AT1G32640
Vc9p318.12	UGT73C6(Vc9p318.12)	TF_motif_seq_0410		1925	-	agaCGCAT	bHLH	AT1G32640
Vc9p318.12	UGT73C6(Vc9p318.12)	TF_motif_seq_0422		1808	-	aatGCATG	LEA_5	U22102
Vc9p318.12	UGT73C6(Vc9p318.12)	TF_motif_seq_0424		501	-	ctgCGTGG	bZIP	AT1G03970;AT2G46270;AT4G01120;AT4G36730
Vc9p318.12	UGT73C6(Vc9p318.12)	TF_motif_seq_0430		263	-	gggGGCCC	TCP	Os04g0194600;Os08g0544800
Vc9p318.12	UGT73C6(Vc9p318.12)	TF_motif_seq_0430		265	+	GGGCCctc	TCP	Os04g0194600;Os08g0544800
Vc9p318.12	UGT73C6(Vc9p318.12)	TF_motif_seq_0431		110	-	ttgGGACC	TCP	Os04g0194600;Os08g0544800
Vc9p318.12	UGT73C6(Vc9p318.12)	TF_motif_seq_0431		139	-	gggGGACC	TCP	Os04g0194600;Os08g0544800
Vc9p318.12	UGT73C6(Vc9p318.12)	TF_motif_seq_0431		142	+	GGACCcac	TCP	Os04g0194600;Os08g0544800
Vc9p318.12	UGT73C6(Vc9p318.12)	TF_motif_seq_0431		152	-	ttgGGTCC	TCP	Os04g0194600;Os08g0544800
Vc9p318.12	UGT73C6(Vc9p318.12)	TF_motif_seq_0431		155	+	GGTCCcac	TCP	Os04g0194600;Os08g0544800
Vc9p318.12	UGT73C6(Vc9p318.12)	TF_motif_seq_0431		239	+	GGTCCaat	TCP	Os04g0194600;Os08g0544800
Vc9p318.12	UGT73C6(Vc9p318.12)	TF_motif_seq_0431		263	-	gggGGCCC	TCP	Os04g0194600;Os08g0544800
Vc9p318.12	UGT73C6(Vc9p318.12)	TF_motif_seq_0431		265	+	GGGCCctc	TCP	Os04g0194600;Os08g0544800
Vc9p318.12	UGT73C6(Vc9p318.12)	TF_motif_seq_0431		315	-	gtgAGACC	TCP	Os04g0194600;Os08g0544800
Vc9p318.12	UGT73C6(Vc9p318.12)	TF_motif_seq_0431		328	-	gtgGGTCC	TCP	Os04g0194600;Os08g0544800
Vc9p318.12	UGT73C6(Vc9p318.12)	TF_motif_seq_0431		331	+	GGTCCccc	TCP	Os04g0194600;Os08g0544800
Vc9p318.12	UGT73C6(Vc9p318.12)	TF_motif_seq_0431		360	+	GGTCCcaa	TCP	Os04g0194600;Os08g0544800
Vc9p318.12	UGT73C6(Vc9p318.12)	TF_motif_seq_0431		387	+	GGTCCctt	TCP	Os04g0194600;Os08g0544800
Vc9p318.12	UGT73C6(Vc9p318.12)	TF_motif_seq_0431		401	+	GGTCAcaa	TCP	Os04g0194600;Os08g0544800
Vc9p318.12	UGT73C6(Vc9p318.12)	TF_motif_seq_0431		996	-	ctgGGATC	TCP	Os04g0194600;Os08g0544800
Vc9p318.12	UGT73C6(Vc9p318.12)	TF_motif_seq_0444		622	-	tagATTTA	Homeodomain; HD-ZIP;HD-ZIP	AT4G21750;AT4G04890
Vc9p318.12	UGT73C6(Vc9p318.12)	TF_motif_seq_0444		1290	+	TAAATgct	Homeodomain; HD-ZIP;HD-ZIP	AT4G21750;AT4G04890
Vc9p318.12	UGT73C6(Vc9p318.12)	TF_motif_seq_0444		1585	-	tgtATTTA	Homeodomain; HD-ZIP;HD-ZIP	AT4G21750;AT4G04890
Vc9p318.12	UGT73C6(Vc9p318.12)	TF_motif_seq_0451		425	-	cgaCGTCA	bZIP	AT3G12250;AT5G06960;AT5G10030;AT5G65210;AT1G22070
Vc9p318.12	UGT73C6(Vc9p318.12)	TF_motif_seq_0456		1904	-	tcgGGAAA	E2F/DP	AT5G22220;AT2G36010
Vc9p318.12	UGT73C6(Vc9p318.12)	TF_motif_seq_0456		1962	+	TTTCGcgt	E2F/DP	AT5G22220;AT2G36010
Vc9p318.12	UGT73C6(Vc9p318.12)	TF_motif_seq_0472		481	+	CAATGattt	Homeodomain; bZIP; HD-ZIP	AT5G65310
Vc9p318.12	UGT73C6(Vc9p318.12)	TF_motif_seq_0472		1164	-	cagtTATTG	Homeodomain; bZIP; HD-ZIP	AT5G65310
Vc9p318.12	UGT73C6(Vc9p318.12)	TF_motif_seq_0508		5	-	gtGTCCGaa	SBP	AT1G20980;AT1G27360;AT1G27370;AT1G53160;AT1G69170;AT1G76580;AT2G33810;AT2G42200;AT2G47070;AT3G15270;AT3G57920;AT3G60030;AT5G18830;AT5G43270;Os01g0292900;Os01g0922600;Os02g0139400;Os02g0174100;Os02g0177300;Os03g0833300;Os04g0551500;Os05g0408200;Os06g0659100;Os06g0663500;Os06g0703500;Os08g0509600;Os08g0513700;Os08g0531600;Os09g0491532;Os09g0507100;Os11g0496600
Vc9p318.12	UGT73C6(Vc9p318.12)	TF_motif_seq_0508		97	+	cgCGTACag	SBP	AT1G20980;AT1G27360;AT1G27370;AT1G53160;AT1G69170;AT1G76580;AT2G33810;AT2G42200;AT2G47070;AT3G15270;AT3G57920;AT3G60030;AT5G18830;AT5G43270;Os01g0292900;Os01g0922600;Os02g0139400;Os02g0174100;Os02g0177300;Os03g0833300;Os04g0551500;Os05g0408200;Os06g0659100;Os06g0663500;Os06g0703500;Os08g0509600;Os08g0513700;Os08g0531600;Os09g0491532;Os09g0507100;Os11g0496600
Vc9p318.12	UGT73C6(Vc9p318.12)	TF_motif_seq_0508		346	+	tcGGTACat	SBP	AT1G20980;AT1G27360;AT1G27370;AT1G53160;AT1G69170;AT1G76580;AT2G33810;AT2G42200;AT2G47070;AT3G15270;AT3G57920;AT3G60030;AT5G18830;AT5G43270;Os01g0292900;Os01g0922600;Os02g0139400;Os02g0174100;Os02g0177300;Os03g0833300;Os04g0551500;Os05g0408200;Os06g0659100;Os06g0663500;Os06g0703500;Os08g0509600;Os08g0513700;Os08g0531600;Os09g0491532;Os09g0507100;Os11g0496600
Vc9p318.12	UGT73C6(Vc9p318.12)	TF_motif_seq_0508		673	-	ttGTGCGga	SBP	AT1G20980;AT1G27360;AT1G27370;AT1G53160;AT1G69170;AT1G76580;AT2G33810;AT2G42200;AT2G47070;AT3G15270;AT3G57920;AT3G60030;AT5G18830;AT5G43270;Os01g0292900;Os01g0922600;Os02g0139400;Os02g0174100;Os02g0177300;Os03g0833300;Os04g0551500;Os05g0408200;Os06g0659100;Os06g0663500;Os06g0703500;Os08g0509600;Os08g0513700;Os08g0531600;Os09g0491532;Os09g0507100;Os11g0496600
Vc9p318.12	UGT73C6(Vc9p318.12)	TF_motif_seq_0508		770	+	ttTGTACta	SBP	AT1G20980;AT1G27360;AT1G27370;AT1G53160;AT1G69170;AT1G76580;AT2G33810;AT2G42200;AT2G47070;AT3G15270;AT3G57920;AT3G60030;AT5G18830;AT5G43270;Os01g0292900;Os01g0922600;Os02g0139400;Os02g0174100;Os02g0177300;Os03g0833300;Os04g0551500;Os05g0408200;Os06g0659100;Os06g0663500;Os06g0703500;Os08g0509600;Os08g0513700;Os08g0531600;Os09g0491532;Os09g0507100;Os11g0496600
Vc9p318.12	UGT73C6(Vc9p318.12)	TF_motif_seq_0508		771	-	ttGTACTat	SBP	AT1G20980;AT1G27360;AT1G27370;AT1G53160;AT1G69170;AT1G76580;AT2G33810;AT2G42200;AT2G47070;AT3G15270;AT3G57920;AT3G60030;AT5G18830;AT5G43270;Os01g0292900;Os01g0922600;Os02g0139400;Os02g0174100;Os02g0177300;Os03g0833300;Os04g0551500;Os05g0408200;Os06g0659100;Os06g0663500;Os06g0703500;Os08g0509600;Os08g0513700;Os08g0531600;Os09g0491532;Os09g0507100;Os11g0496600
Vc9p318.12	UGT73C6(Vc9p318.12)	TF_motif_seq_0508		843	-	ttGTATGtc	SBP	AT1G20980;AT1G27360;AT1G27370;AT1G53160;AT1G69170;AT1G76580;AT2G33810;AT2G42200;AT2G47070;AT3G15270;AT3G57920;AT3G60030;AT5G18830;AT5G43270;Os01g0292900;Os01g0922600;Os02g0139400;Os02g0174100;Os02g0177300;Os03g0833300;Os04g0551500;Os05g0408200;Os06g0659100;Os06g0663500;Os06g0703500;Os08g0509600;Os08g0513700;Os08g0531600;Os09g0491532;Os09g0507100;Os11g0496600
Vc9p318.12	UGT73C6(Vc9p318.12)	TF_motif_seq_0508		1425	-	ttGTAAGct	SBP	AT1G20980;AT1G27360;AT1G27370;AT1G53160;AT1G69170;AT1G76580;AT2G33810;AT2G42200;AT2G47070;AT3G15270;AT3G57920;AT3G60030;AT5G18830;AT5G43270;Os01g0292900;Os01g0922600;Os02g0139400;Os02g0174100;Os02g0177300;Os03g0833300;Os04g0551500;Os05g0408200;Os06g0659100;Os06g0663500;Os06g0703500;Os08g0509600;Os08g0513700;Os08g0531600;Os09g0491532;Os09g0507100;Os11g0496600
Vc9p318.12	UGT73C6(Vc9p318.12)	TF_motif_seq_0508		1471	+	cgCTTACaa	SBP	AT1G20980;AT1G27360;AT1G27370;AT1G53160;AT1G69170;AT1G76580;AT2G33810;AT2G42200;AT2G47070;AT3G15270;AT3G57920;AT3G60030;AT5G18830;AT5G43270;Os01g0292900;Os01g0922600;Os02g0139400;Os02g0174100;Os02g0177300;Os03g0833300;Os04g0551500;Os05g0408200;Os06g0659100;Os06g0663500;Os06g0703500;Os08g0509600;Os08g0513700;Os08g0531600;Os09g0491532;Os09g0507100;Os11g0496600
Vc9p318.12	UGT73C6(Vc9p318.12)	TF_motif_seq_0508		1752	-	cgGTACGta	SBP	AT1G20980;AT1G27360;AT1G27370;AT1G53160;AT1G69170;AT1G76580;AT2G33810;AT2G42200;AT2G47070;AT3G15270;AT3G57920;AT3G60030;AT5G18830;AT5G43270;Os01g0292900;Os01g0922600;Os02g0139400;Os02g0174100;Os02g0177300;Os03g0833300;Os04g0551500;Os05g0408200;Os06g0659100;Os06g0663500;Os06g0703500;Os08g0509600;Os08g0513700;Os08g0531600;Os09g0491532;Os09g0507100;Os11g0496600
Vc9p318.12	UGT73C6(Vc9p318.12)	TF_motif_seq_0508		1755	+	taCGTAAag	SBP	AT1G20980;AT1G27360;AT1G27370;AT1G53160;AT1G69170;AT1G76580;AT2G33810;AT2G42200;AT2G47070;AT3G15270;AT3G57920;AT3G60030;AT5G18830;AT5G43270;Os01g0292900;Os01g0922600;Os02g0139400;Os02g0174100;Os02g0177300;Os03g0833300;Os04g0551500;Os05g0408200;Os06g0659100;Os06g0663500;Os06g0703500;Os08g0509600;Os08g0513700;Os08g0531600;Os09g0491532;Os09g0507100;Os11g0496600
Vc9p318.12	UGT73C6(Vc9p318.12)	TF_motif_seq_0508		1940	-	gtGAACGca	SBP	AT1G20980;AT1G27360;AT1G27370;AT1G53160;AT1G69170;AT1G76580;AT2G33810;AT2G42200;AT2G47070;AT3G15270;AT3G57920;AT3G60030;AT5G18830;AT5G43270;Os01g0292900;Os01g0922600;Os02g0139400;Os02g0174100;Os02g0177300;Os03g0833300;Os04g0551500;Os05g0408200;Os06g0659100;Os06g0663500;Os06g0703500;Os08g0509600;Os08g0513700;Os08g0531600;Os09g0491532;Os09g0507100;Os11g0496600
Vc9p318.12	UGT73C6(Vc9p318.12)	TF_motif_seq_0007	D1GMAUX28	20	+	ACAGTtggaa	(Motif sequence only)
Vc9p318.12	UGT73C6(Vc9p318.12)	TF_motif_seq_0007	D1GMAUX28	607	-	ttacaACTGT	(Motif sequence only)
Vc9p318.12	UGT73C6(Vc9p318.12)	TF_motif_seq_0009	LS7ATPR1	427	+	ACGTCacaac	(Motif sequence only)
Vc9p318.12	UGT73C6(Vc9p318.12)	TF_motif_seq_0009	LS7ATPR1	829	+	ACGTCctata	(Motif sequence only)
Vc9p318.12	UGT73C6(Vc9p318.12)	TF_motif_seq_0009	LS7ATPR1	1102	-	cttatGACTT	(Motif sequence only)
Vc9p318.12	UGT73C6(Vc9p318.12)	TF_motif_seq_0009	LS7ATPR1	1403	-	tttctGACTT	(Motif sequence only)
Vc9p318.12	UGT73C6(Vc9p318.12)	TF_motif_seq_0009	LS7ATPR1	1636	+	AGGTCtttga	(Motif sequence only)
Vc9p318.12	UGT73C6(Vc9p318.12)	TF_motif_seq_0009	LS7ATPR1	1779	+	ACGACacaaa	(Motif sequence only)
Vc9p318.12	UGT73C6(Vc9p318.12)	TF_motif_seq_0009	LS7ATPR1	1789	+	ACGCCaaaga	(Motif sequence only)
Vc9p318.12	UGT73C6(Vc9p318.12)	TF_motif_seq_0009	LS7ATPR1	1810	-	tgcatGACGC	(Motif sequence only)
Vc9p318.12	UGT73C6(Vc9p318.12)	TF_motif_seq_0013	ABREMOTIFIOSRAB16B	1176	-	tccaaGTACT	(Motif sequence only)
Vc9p318.12	UGT73C6(Vc9p318.12)	TF_motif_seq_0013	ABREMOTIFIOSRAB16B	1180	+	AGTACtatgc	(Motif sequence only)
Vc9p318.12	UGT73C6(Vc9p318.12)	TF_motif_seq_0025	TATABOX1	788	-	atattTATAG	(Motif sequence only)
Vc9p318.12	UGT73C6(Vc9p318.12)	TF_motif_seq_0026	B2GMAUX28	1831	-	taatcACAAG	(Motif sequence only)
Vc9p318.12	UGT73C6(Vc9p318.12)	TF_motif_seq_0027	CARGCW8GAT	1298	+	CTAAAatttg	(Motif sequence only)
Vc9p318.12	UGT73C6(Vc9p318.12)	TF_motif_seq_0027	CARGCW8GAT	1298	-	ctaaaATTTG	(Motif sequence only)
Vc9p318.12	UGT73C6(Vc9p318.12)	TF_motif_seq_0029	ACEATCHS	453	+	GACACattgc	(Motif sequence only)
Vc9p318.12	UGT73C6(Vc9p318.12)	TF_motif_seq_0031	GCAACREPEATZMZEIN	1818	+	GCAACaaaaa	(Motif sequence only)
Vc9p318.12	UGT73C6(Vc9p318.12)	TF_motif_seq_0031	GCAACREPEATZMZEIN	1876	+	GCAACaccaa	(Motif sequence only)
Vc9p318.12	UGT73C6(Vc9p318.12)	TF_motif_seq_0048	ABREBZMRAB28	33	-	gcaaaGTGGA	(Motif sequence only)
Vc9p318.12	UGT73C6(Vc9p318.12)	TF_motif_seq_0048	ABREBZMRAB28	1741	-	aggatGTGGA	(Motif sequence only)
Vc9p318.12	UGT73C6(Vc9p318.12)	TF_motif_seq_0052	LS5ATPR1	616	-	ttatcGTAGA	(Motif sequence only)
Vc9p318.12	UGT73C6(Vc9p318.12)	TF_motif_seq_0064	DR5GMGH3	391	+	CCTTTtgaatg	(Motif sequence only)
Vc9p318.12	UGT73C6(Vc9p318.12)	TF_motif_seq_0064	DR5GMGH3	1400	+	CCTTTtctgac	(Motif sequence only)
Vc9p318.12	UGT73C6(Vc9p318.12)	TF_motif_seq_0064	DR5GMGH3	1878	-	aacaccAAAGG	(Motif sequence only)
Vc9p318.12	UGT73C6(Vc9p318.12)	TF_motif_seq_0068	GBOXRELOSAMY3	94	+	CTACGcgtaca	(Motif sequence only)
Vc9p318.12	UGT73C6(Vc9p318.12)	TF_motif_seq_0070	GLUTECOREOS	1961	+	CTTTCgcgttt	(Motif sequence only)
Vc9p318.12	UGT73C6(Vc9p318.12)	TF_motif_seq_0071	RNFG1OS	1072	-	aatctcTGATC	(Motif sequence only)
Vc9p318.12	UGT73C6(Vc9p318.12)	TF_motif_seq_0071	RNFG1OS	1522	-	taactaTGATC	(Motif sequence only)
Vc9p318.12	UGT73C6(Vc9p318.12)	TF_motif_seq_0077	ABRE3OSRAB16	1754	+	GTACGtaaagc	(Motif sequence only)
Vc9p318.12	UGT73C6(Vc9p318.12)	TF_motif_seq_0079	C1MOTIFZMBZ2	1323	+	TAACTtaagta	(Motif sequence only)
Vc9p318.12	UGT73C6(Vc9p318.12)	TF_motif_seq_0079	C1MOTIFZMBZ2	1496	+	TAACTaaaata	(Motif sequence only)
Vc9p318.12	UGT73C6(Vc9p318.12)	TF_motif_seq_0079	C1MOTIFZMBZ2	1500	-	taaaatAGTTA	(Motif sequence only)
Vc9p318.12	UGT73C6(Vc9p318.12)	TF_motif_seq_0083	D3GMAUX28	521	-	attatcAAATA	(Motif sequence only)
Vc9p318.12	UGT73C6(Vc9p318.12)	TF_motif_seq_0083	D3GMAUX28	708	+	TATTTtctcta	(Motif sequence only)
Vc9p318.12	UGT73C6(Vc9p318.12)	TF_motif_seq_0083	D3GMAUX28	859	-	ttcatgAAATA	(Motif sequence only)
Vc9p318.12	UGT73C6(Vc9p318.12)	TF_motif_seq_0083	D3GMAUX28	1230	-	ttctgaAAATA	(Motif sequence only)
Vc9p318.12	UGT73C6(Vc9p318.12)	TF_motif_seq_0083	D3GMAUX28	1313	+	TATTTtcttct	(Motif sequence only)
Vc9p318.12	UGT73C6(Vc9p318.12)	TF_motif_seq_0092	GLUTAACAOS	1136	-	ataacgtTTGTT	(Motif sequence only)
Vc9p318.12	UGT73C6(Vc9p318.12)	TF_motif_seq_0107	CARGNCAT	391	+	CCTTTtgaatgg	(Motif sequence only)
Vc9p318.12	UGT73C6(Vc9p318.12)	TF_motif_seq_0107	CARGNCAT	391	-	ccttttgAATGG	(Motif sequence only)
Vc9p318.12	UGT73C6(Vc9p318.12)	TF_motif_seq_0114	MREATCHS	1516	+	TCTAActaacta	(Motif sequence only)
Vc9p318.12	UGT73C6(Vc9p318.12)	TF_motif_seq_0130	AACAOSGLUB1	1819	+	CAACAaaaaacata	(Motif sequence only)
Vc9p318.12	UGT73C6(Vc9p318.12)	TF_motif_seq_0150	GLUTEBOX2OSGT3	149	+	CTTTTgggtcccaca	(Motif sequence only)
Vc9p318.12	UGT73C6(Vc9p318.12)	TF_motif_seq_0164	ELEMENT2GMLBC3	189	+	CTTAAattttttgatt	(Motif sequence only)
Vc9p318.12	UGT73C6(Vc9p318.12)	TF_motif_seq_0164	ELEMENT2GMLBC3	1021	+	CTTAAaaaatctatgt	(Motif sequence only)
Vc9p318.12	UGT73C6(Vc9p318.12)	TF_motif_seq_0180	GAGAGMGSA1	1561	+	GAGAGagaataagagaat	(Motif sequence only)
Vc9p318.12	UGT73C6(Vc9p318.12)	TF_motif_seq_0192	-314MOTIFZMSBE1	831	-	gtcctatattatttgTATGT	(Motif sequence only)
Vc9p318.12	UGT73C6(Vc9p318.12)	TF_motif_seq_0196	OCSELEMENTAT	1814	+	TGACGcaacaaaaaacataa	(Motif sequence only)
Vc9p318.12	UGT73C6(Vc9p318.12)	TF_motif_seq_0226	COREOS	748	+	taatttggctttATAAAattcttttgta	(Motif sequence only)
Vc9p318.12	UGT73C6(Vc9p318.12)	TF_motif_seq_0238	DOFCOREZM	28	+	AAAGT	(Motif sequence only)
Vc9p318.12	UGT73C6(Vc9p318.12)	TF_motif_seq_0238	DOFCOREZM	35	+	AAAGT	(Motif sequence only)
Vc9p318.12	UGT73C6(Vc9p318.12)	TF_motif_seq_0238	DOFCOREZM	62	+	AAAGA	(Motif sequence only)
Vc9p318.12	UGT73C6(Vc9p318.12)	TF_motif_seq_0238	DOFCOREZM	69	+	AAAGT	(Motif sequence only)
Vc9p318.12	UGT73C6(Vc9p318.12)	TF_motif_seq_0238	DOFCOREZM	76	-	ACTTT	(Motif sequence only)
Vc9p318.12	UGT73C6(Vc9p318.12)	TF_motif_seq_0238	DOFCOREZM	148	-	ACTTT	(Motif sequence only)
Vc9p318.12	UGT73C6(Vc9p318.12)	TF_motif_seq_0238	DOFCOREZM	230	-	ACTTT	(Motif sequence only)
Vc9p318.12	UGT73C6(Vc9p318.12)	TF_motif_seq_0238	DOFCOREZM	236	+	AAAGG	(Motif sequence only)
Vc9p318.12	UGT73C6(Vc9p318.12)	TF_motif_seq_0238	DOFCOREZM	325	+	AAAGT	(Motif sequence only)
Vc9p318.12	UGT73C6(Vc9p318.12)	TF_motif_seq_0238	DOFCOREZM	391	-	CCTTT	(Motif sequence only)
Vc9p318.12	UGT73C6(Vc9p318.12)	TF_motif_seq_0238	DOFCOREZM	475	-	TCTTT	(Motif sequence only)
Vc9p318.12	UGT73C6(Vc9p318.12)	TF_motif_seq_0238	DOFCOREZM	509	+	AAAGG	(Motif sequence only)
Vc9p318.12	UGT73C6(Vc9p318.12)	TF_motif_seq_0238	DOFCOREZM	601	+	AAAGT	(Motif sequence only)
Vc9p318.12	UGT73C6(Vc9p318.12)	TF_motif_seq_0238	DOFCOREZM	755	-	GCTTT	(Motif sequence only)
Vc9p318.12	UGT73C6(Vc9p318.12)	TF_motif_seq_0238	DOFCOREZM	767	-	TCTTT	(Motif sequence only)
Vc9p318.12	UGT73C6(Vc9p318.12)	TF_motif_seq_0238	DOFCOREZM	979	-	TCTTT	(Motif sequence only)
Vc9p318.12	UGT73C6(Vc9p318.12)	TF_motif_seq_0238	DOFCOREZM	1002	-	TCTTT	(Motif sequence only)
Vc9p318.12	UGT73C6(Vc9p318.12)	TF_motif_seq_0238	DOFCOREZM	1052	+	AAAGG	(Motif sequence only)
Vc9p318.12	UGT73C6(Vc9p318.12)	TF_motif_seq_0238	DOFCOREZM	1114	-	TCTTT	(Motif sequence only)
Vc9p318.12	UGT73C6(Vc9p318.12)	TF_motif_seq_0238	DOFCOREZM	1205	+	AAAGC	(Motif sequence only)
Vc9p318.12	UGT73C6(Vc9p318.12)	TF_motif_seq_0238	DOFCOREZM	1283	-	TCTTT	(Motif sequence only)
Vc9p318.12	UGT73C6(Vc9p318.12)	TF_motif_seq_0238	DOFCOREZM	1335	-	TCTTT	(Motif sequence only)
Vc9p318.12	UGT73C6(Vc9p318.12)	TF_motif_seq_0238	DOFCOREZM	1360	-	TCTTT	(Motif sequence only)
Vc9p318.12	UGT73C6(Vc9p318.12)	TF_motif_seq_0238	DOFCOREZM	1381	-	TCTTT	(Motif sequence only)
Vc9p318.12	UGT73C6(Vc9p318.12)	TF_motif_seq_0238	DOFCOREZM	1400	-	CCTTT	(Motif sequence only)
Vc9p318.12	UGT73C6(Vc9p318.12)	TF_motif_seq_0238	DOFCOREZM	1444	-	TCTTT	(Motif sequence only)
Vc9p318.12	UGT73C6(Vc9p318.12)	TF_motif_seq_0238	DOFCOREZM	1550	+	AAAGA	(Motif sequence only)
Vc9p318.12	UGT73C6(Vc9p318.12)	TF_motif_seq_0238	DOFCOREZM	1608	+	AAAGA	(Motif sequence only)
Vc9p318.12	UGT73C6(Vc9p318.12)	TF_motif_seq_0238	DOFCOREZM	1614	+	AAAGG	(Motif sequence only)
Vc9p318.12	UGT73C6(Vc9p318.12)	TF_motif_seq_0238	DOFCOREZM	1639	-	TCTTT	(Motif sequence only)
Vc9p318.12	UGT73C6(Vc9p318.12)	TF_motif_seq_0238	DOFCOREZM	1664	+	AAAGT	(Motif sequence only)
Vc9p318.12	UGT73C6(Vc9p318.12)	TF_motif_seq_0238	DOFCOREZM	1760	+	AAAGC	(Motif sequence only)
Vc9p318.12	UGT73C6(Vc9p318.12)	TF_motif_seq_0238	DOFCOREZM	1763	-	GCTTT	(Motif sequence only)
Vc9p318.12	UGT73C6(Vc9p318.12)	TF_motif_seq_0238	DOFCOREZM	1794	+	AAAGA	(Motif sequence only)
Vc9p318.12	UGT73C6(Vc9p318.12)	TF_motif_seq_0238	DOFCOREZM	1840	-	GCTTT	(Motif sequence only)
Vc9p318.12	UGT73C6(Vc9p318.12)	TF_motif_seq_0238	DOFCOREZM	1884	+	AAAGG	(Motif sequence only)
Vc9p318.12	UGT73C6(Vc9p318.12)	TF_motif_seq_0238	DOFCOREZM	1898	-	ACTTT	(Motif sequence only)
Vc9p318.12	UGT73C6(Vc9p318.12)	TF_motif_seq_0238	DOFCOREZM	1960	-	TCTTT	(Motif sequence only)
Vc9p318.12	UGT73C6(Vc9p318.12)	TF_motif_seq_0248	MYBCOREATCYCB1	2	+	AACGT	(Motif sequence only)
Vc9p318.12	UGT73C6(Vc9p318.12)	TF_motif_seq_0248	MYBCOREATCYCB1	14	+	AACTG	(Motif sequence only)
Vc9p318.12	UGT73C6(Vc9p318.12)	TF_motif_seq_0248	MYBCOREATCYCB1	21	-	CAGTT	(Motif sequence only)
Vc9p318.12	UGT73C6(Vc9p318.12)	TF_motif_seq_0248	MYBCOREATCYCB1	83	+	AATGG	(Motif sequence only)
Vc9p318.12	UGT73C6(Vc9p318.12)	TF_motif_seq_0248	MYBCOREATCYCB1	128	-	CCGAT	(Motif sequence only)
Vc9p318.12	UGT73C6(Vc9p318.12)	TF_motif_seq_0248	MYBCOREATCYCB1	175	+	AACCG	(Motif sequence only)
Vc9p318.12	UGT73C6(Vc9p318.12)	TF_motif_seq_0248	MYBCOREATCYCB1	177	-	CCGTT	(Motif sequence only)
Vc9p318.12	UGT73C6(Vc9p318.12)	TF_motif_seq_0248	MYBCOREATCYCB1	207	+	AACGG	(Motif sequence only)
Vc9p318.12	UGT73C6(Vc9p318.12)	TF_motif_seq_0248	MYBCOREATCYCB1	236	+	AAAGG	(Motif sequence only)
Vc9p318.12	UGT73C6(Vc9p318.12)	TF_motif_seq_0248	MYBCOREATCYCB1	296	+	AACGG	(Motif sequence only)
Vc9p318.12	UGT73C6(Vc9p318.12)	TF_motif_seq_0248	MYBCOREATCYCB1	298	-	CGGTT	(Motif sequence only)
Vc9p318.12	UGT73C6(Vc9p318.12)	TF_motif_seq_0248	MYBCOREATCYCB1	345	+	ATCGG	(Motif sequence only)
Vc9p318.12	UGT73C6(Vc9p318.12)	TF_motif_seq_0248	MYBCOREATCYCB1	390	-	CCCTT	(Motif sequence only)
Vc9p318.12	UGT73C6(Vc9p318.12)	TF_motif_seq_0248	MYBCOREATCYCB1	391	-	CCTTT	(Motif sequence only)
Vc9p318.12	UGT73C6(Vc9p318.12)	TF_motif_seq_0248	MYBCOREATCYCB1	398	+	AATGG	(Motif sequence only)
Vc9p318.12	UGT73C6(Vc9p318.12)	TF_motif_seq_0248	MYBCOREATCYCB1	509	+	AAAGG	(Motif sequence only)
Vc9p318.12	UGT73C6(Vc9p318.12)	TF_motif_seq_0248	MYBCOREATCYCB1	563	-	CTGTT	(Motif sequence only)
Vc9p318.12	UGT73C6(Vc9p318.12)	TF_motif_seq_0248	MYBCOREATCYCB1	611	+	AACTG	(Motif sequence only)
Vc9p318.12	UGT73C6(Vc9p318.12)	TF_motif_seq_0248	MYBCOREATCYCB1	613	-	CTGTT	(Motif sequence only)
Vc9p318.12	UGT73C6(Vc9p318.12)	TF_motif_seq_0248	MYBCOREATCYCB1	729	+	AATGG	(Motif sequence only)
Vc9p318.12	UGT73C6(Vc9p318.12)	TF_motif_seq_0248	MYBCOREATCYCB1	828	+	AACGT	(Motif sequence only)
Vc9p318.12	UGT73C6(Vc9p318.12)	TF_motif_seq_0248	MYBCOREATCYCB1	881	-	CAGTT	(Motif sequence only)
Vc9p318.12	UGT73C6(Vc9p318.12)	TF_motif_seq_0248	MYBCOREATCYCB1	914	+	AATGG	(Motif sequence only)
Vc9p318.12	UGT73C6(Vc9p318.12)	TF_motif_seq_0248	MYBCOREATCYCB1	923	+	AACTG	(Motif sequence only)
Vc9p318.12	UGT73C6(Vc9p318.12)	TF_motif_seq_0248	MYBCOREATCYCB1	1052	+	AAAGG	(Motif sequence only)
Vc9p318.12	UGT73C6(Vc9p318.12)	TF_motif_seq_0248	MYBCOREATCYCB1	1138	+	AACGT	(Motif sequence only)
Vc9p318.12	UGT73C6(Vc9p318.12)	TF_motif_seq_0248	MYBCOREATCYCB1	1139	-	ACGTT	(Motif sequence only)
Vc9p318.12	UGT73C6(Vc9p318.12)	TF_motif_seq_0248	MYBCOREATCYCB1	1164	-	CAGTT	(Motif sequence only)
Vc9p318.12	UGT73C6(Vc9p318.12)	TF_motif_seq_0248	MYBCOREATCYCB1	1387	-	TCGTT	(Motif sequence only)
Vc9p318.12	UGT73C6(Vc9p318.12)	TF_motif_seq_0248	MYBCOREATCYCB1	1400	-	CCTTT	(Motif sequence only)
Vc9p318.12	UGT73C6(Vc9p318.12)	TF_motif_seq_0248	MYBCOREATCYCB1	1469	+	AACGC	(Motif sequence only)
Vc9p318.12	UGT73C6(Vc9p318.12)	TF_motif_seq_0248	MYBCOREATCYCB1	1614	+	AAAGG	(Motif sequence only)
Vc9p318.12	UGT73C6(Vc9p318.12)	TF_motif_seq_0248	MYBCOREATCYCB1	1750	+	ATCGG	(Motif sequence only)
Vc9p318.12	UGT73C6(Vc9p318.12)	TF_motif_seq_0248	MYBCOREATCYCB1	1778	+	AACGA	(Motif sequence only)
Vc9p318.12	UGT73C6(Vc9p318.12)	TF_motif_seq_0248	MYBCOREATCYCB1	1788	+	AACGC	(Motif sequence only)
Vc9p318.12	UGT73C6(Vc9p318.12)	TF_motif_seq_0248	MYBCOREATCYCB1	1863	-	CCATT	(Motif sequence only)
Vc9p318.12	UGT73C6(Vc9p318.12)	TF_motif_seq_0248	MYBCOREATCYCB1	1884	+	AAAGG	(Motif sequence only)
Vc9p318.12	UGT73C6(Vc9p318.12)	TF_motif_seq_0248	MYBCOREATCYCB1	1937	-	CCGGT	(Motif sequence only)
Vc9p318.12	UGT73C6(Vc9p318.12)	TF_motif_seq_0248	MYBCOREATCYCB1	1943	+	AACGC	(Motif sequence only)
Vc9p318.12	UGT73C6(Vc9p318.12)	TF_motif_seq_0248	MYBCOREATCYCB1	1966	-	GCGTT	(Motif sequence only)
Vc9p318.12	UGT73C6(Vc9p318.12)	TF_motif_seq_0248	MYBCOREATCYCB1	1978	+	AACGC	(Motif sequence only)
Vc9p318.12	UGT73C6(Vc9p318.12)	TF_motif_seq_0249	ABRELATERD1	2	-	AACGT	(Motif sequence only)
Vc9p318.12	UGT73C6(Vc9p318.12)	TF_motif_seq_0249	ABRELATERD1	3	+	ACGTG	(Motif sequence only)
Vc9p318.12	UGT73C6(Vc9p318.12)	TF_motif_seq_0249	ABRELATERD1	29	+	AAGTG	(Motif sequence only)
Vc9p318.12	UGT73C6(Vc9p318.12)	TF_motif_seq_0249	ABRELATERD1	36	+	AAGTG	(Motif sequence only)
Vc9p318.12	UGT73C6(Vc9p318.12)	TF_motif_seq_0249	ABRELATERD1	96	+	ACGCG	(Motif sequence only)
Vc9p318.12	UGT73C6(Vc9p318.12)	TF_motif_seq_0249	ABRELATERD1	97	-	CGCGT	(Motif sequence only)
Vc9p318.12	UGT73C6(Vc9p318.12)	TF_motif_seq_0249	ABRELATERD1	147	-	CACTT	(Motif sequence only)
Vc9p318.12	UGT73C6(Vc9p318.12)	TF_motif_seq_0249	ABRELATERD1	162	-	CACGA	(Motif sequence only)
Vc9p318.12	UGT73C6(Vc9p318.12)	TF_motif_seq_0249	ABRELATERD1	163	+	ACGAG	(Motif sequence only)
Vc9p318.12	UGT73C6(Vc9p318.12)	TF_motif_seq_0249	ABRELATERD1	229	-	CACTT	(Motif sequence only)
Vc9p318.12	UGT73C6(Vc9p318.12)	TF_motif_seq_0249	ABRELATERD1	310	-	CTCGT	(Motif sequence only)
Vc9p318.12	UGT73C6(Vc9p318.12)	TF_motif_seq_0249	ABRELATERD1	311	+	TCGTG	(Motif sequence only)
Vc9p318.12	UGT73C6(Vc9p318.12)	TF_motif_seq_0249	ABRELATERD1	326	+	AAGTG	(Motif sequence only)
Vc9p318.12	UGT73C6(Vc9p318.12)	TF_motif_seq_0249	ABRELATERD1	414	-	CACAT	(Motif sequence only)
Vc9p318.12	UGT73C6(Vc9p318.12)	TF_motif_seq_0249	ABRELATERD1	426	-	GACGT	(Motif sequence only)
Vc9p318.12	UGT73C6(Vc9p318.12)	TF_motif_seq_0249	ABRELATERD1	427	+	ACGTC	(Motif sequence only)
Vc9p318.12	UGT73C6(Vc9p318.12)	TF_motif_seq_0249	ABRELATERD1	441	-	CACAT	(Motif sequence only)
Vc9p318.12	UGT73C6(Vc9p318.12)	TF_motif_seq_0249	ABRELATERD1	447	-	CACGC	(Motif sequence only)
Vc9p318.12	UGT73C6(Vc9p318.12)	TF_motif_seq_0249	ABRELATERD1	455	-	CACAT	(Motif sequence only)
Vc9p318.12	UGT73C6(Vc9p318.12)	TF_motif_seq_0249	ABRELATERD1	503	+	GCGTG	(Motif sequence only)
Vc9p318.12	UGT73C6(Vc9p318.12)	TF_motif_seq_0249	ABRELATERD1	798	-	CAAGT	(Motif sequence only)
Vc9p318.12	UGT73C6(Vc9p318.12)	TF_motif_seq_0249	ABRELATERD1	828	-	AACGT	(Motif sequence only)
Vc9p318.12	UGT73C6(Vc9p318.12)	TF_motif_seq_0249	ABRELATERD1	829	+	ACGTC	(Motif sequence only)
Vc9p318.12	UGT73C6(Vc9p318.12)	TF_motif_seq_0249	ABRELATERD1	899	-	CAGGT	(Motif sequence only)
Vc9p318.12	UGT73C6(Vc9p318.12)	TF_motif_seq_0249	ABRELATERD1	1108	+	ACTTG	(Motif sequence only)
Vc9p318.12	UGT73C6(Vc9p318.12)	TF_motif_seq_0249	ABRELATERD1	1138	-	AACGT	(Motif sequence only)
Vc9p318.12	UGT73C6(Vc9p318.12)	TF_motif_seq_0249	ABRELATERD1	1139	+	ACGTT	(Motif sequence only)
Vc9p318.12	UGT73C6(Vc9p318.12)	TF_motif_seq_0249	ABRELATERD1	1178	-	CAAGT	(Motif sequence only)
Vc9p318.12	UGT73C6(Vc9p318.12)	TF_motif_seq_0249	ABRELATERD1	1189	-	CACTT	(Motif sequence only)
Vc9p318.12	UGT73C6(Vc9p318.12)	TF_motif_seq_0249	ABRELATERD1	1592	+	ATGTG	(Motif sequence only)
Vc9p318.12	UGT73C6(Vc9p318.12)	TF_motif_seq_0249	ABRELATERD1	1665	+	AAGTG	(Motif sequence only)
Vc9p318.12	UGT73C6(Vc9p318.12)	TF_motif_seq_0249	ABRELATERD1	1744	+	ATGTG	(Motif sequence only)
Vc9p318.12	UGT73C6(Vc9p318.12)	TF_motif_seq_0249	ABRELATERD1	1755	-	TACGT	(Motif sequence only)
Vc9p318.12	UGT73C6(Vc9p318.12)	TF_motif_seq_0249	ABRELATERD1	1756	+	ACGTA	(Motif sequence only)
Vc9p318.12	UGT73C6(Vc9p318.12)	TF_motif_seq_0249	ABRELATERD1	1803	-	CTCGT	(Motif sequence only)
Vc9p318.12	UGT73C6(Vc9p318.12)	TF_motif_seq_0249	ABRELATERD1	1965	-	CGCGT	(Motif sequence only)
Vc9p318.12	UGT73C6(Vc9p318.12)	TF_motif_seq_0249	ABRELATERD1	1984	-	CAAGT	(Motif sequence only)
Vc9p318.12	UGT73C6(Vc9p318.12)	TF_motif_seq_0259	CGACGOSAMY3	94	+	CTACG	(Motif sequence only)
Vc9p318.12	UGT73C6(Vc9p318.12)	TF_motif_seq_0259	CGACGOSAMY3	269	-	CCTCG	(Motif sequence only)
Vc9p318.12	UGT73C6(Vc9p318.12)	TF_motif_seq_0259	CGACGOSAMY3	382	-	AGTCG	(Motif sequence only)
Vc9p318.12	UGT73C6(Vc9p318.12)	TF_motif_seq_0259	CGACGOSAMY3	425	+	CGACG	(Motif sequence only)
Vc9p318.12	UGT73C6(Vc9p318.12)	TF_motif_seq_0259	CGACGOSAMY3	425	-	CGACG	(Motif sequence only)
Vc9p318.12	UGT73C6(Vc9p318.12)	TF_motif_seq_0259	CGACGOSAMY3	428	-	CGTCA	(Motif sequence only)
Vc9p318.12	UGT73C6(Vc9p318.12)	TF_motif_seq_0259	CGACGOSAMY3	449	+	CGCCG	(Motif sequence only)
Vc9p318.12	UGT73C6(Vc9p318.12)	TF_motif_seq_0259	CGACGOSAMY3	449	-	CGCCG	(Motif sequence only)
Vc9p318.12	UGT73C6(Vc9p318.12)	TF_motif_seq_0259	CGACGOSAMY3	452	+	CGACA	(Motif sequence only)
Vc9p318.12	UGT73C6(Vc9p318.12)	TF_motif_seq_0259	CGACGOSAMY3	504	-	CGTGG	(Motif sequence only)
Vc9p318.12	UGT73C6(Vc9p318.12)	TF_motif_seq_0259	CGACGOSAMY3	620	-	CGTAG	(Motif sequence only)
Vc9p318.12	UGT73C6(Vc9p318.12)	TF_motif_seq_0259	CGACGOSAMY3	650	-	GGTCG	(Motif sequence only)
Vc9p318.12	UGT73C6(Vc9p318.12)	TF_motif_seq_0259	CGACGOSAMY3	830	-	CGTCC	(Motif sequence only)
Vc9p318.12	UGT73C6(Vc9p318.12)	TF_motif_seq_0259	CGACGOSAMY3	1388	-	CGTTG	(Motif sequence only)
Vc9p318.12	UGT73C6(Vc9p318.12)	TF_motif_seq_0259	CGACGOSAMY3	1777	+	CAACG	(Motif sequence only)
Vc9p318.12	UGT73C6(Vc9p318.12)	TF_motif_seq_0259	CGACGOSAMY3	1780	+	CGACA	(Motif sequence only)
Vc9p318.12	UGT73C6(Vc9p318.12)	TF_motif_seq_0259	CGACGOSAMY3	1814	+	TGACG	(Motif sequence only)
Vc9p318.12	UGT73C6(Vc9p318.12)	TF_motif_seq_0259	CGACGOSAMY3	1925	+	AGACG	(Motif sequence only)
Vc9p318.12	UGT73C6(Vc9p318.12)	TF_motif_seq_0260	OSE2ROOTNODULE	889	-	AAGAG	(Motif sequence only)
Vc9p318.12	UGT73C6(Vc9p318.12)	TF_motif_seq_0260	OSE2ROOTNODULE	950	+	CTCTT	(Motif sequence only)
Vc9p318.12	UGT73C6(Vc9p318.12)	TF_motif_seq_0260	OSE2ROOTNODULE	991	-	AAGAG	(Motif sequence only)
Vc9p318.12	UGT73C6(Vc9p318.12)	TF_motif_seq_0260	OSE2ROOTNODULE	1282	+	CTCTT	(Motif sequence only)
Vc9p318.12	UGT73C6(Vc9p318.12)	TF_motif_seq_0260	OSE2ROOTNODULE	1551	-	AAGAG	(Motif sequence only)
Vc9p318.12	UGT73C6(Vc9p318.12)	TF_motif_seq_0260	OSE2ROOTNODULE	1571	-	AAGAG	(Motif sequence only)
Vc9p318.12	UGT73C6(Vc9p318.12)	TF_motif_seq_0261	SURECOREATSULTR11	5	-	GTGTC	(Motif sequence only)
Vc9p318.12	UGT73C6(Vc9p318.12)	TF_motif_seq_0261	SURECOREATSULTR11	63	+	AAGAC	(Motif sequence only)
Vc9p318.12	UGT73C6(Vc9p318.12)	TF_motif_seq_0261	SURECOREATSULTR11	112	+	GGGAC	(Motif sequence only)
Vc9p318.12	UGT73C6(Vc9p318.12)	TF_motif_seq_0261	SURECOREATSULTR11	141	+	GGGAC	(Motif sequence only)
Vc9p318.12	UGT73C6(Vc9p318.12)	TF_motif_seq_0261	SURECOREATSULTR11	156	-	GTCCC	(Motif sequence only)
Vc9p318.12	UGT73C6(Vc9p318.12)	TF_motif_seq_0261	SURECOREATSULTR11	169	+	GATAC	(Motif sequence only)
Vc9p318.12	UGT73C6(Vc9p318.12)	TF_motif_seq_0261	SURECOREATSULTR11	205	+	GAAAC	(Motif sequence only)
Vc9p318.12	UGT73C6(Vc9p318.12)	TF_motif_seq_0261	SURECOREATSULTR11	317	+	GAGAC	(Motif sequence only)
Vc9p318.12	UGT73C6(Vc9p318.12)	TF_motif_seq_0261	SURECOREATSULTR11	332	-	GTCCC	(Motif sequence only)
Vc9p318.12	UGT73C6(Vc9p318.12)	TF_motif_seq_0261	SURECOREATSULTR11	361	-	GTCCC	(Motif sequence only)
Vc9p318.12	UGT73C6(Vc9p318.12)	TF_motif_seq_0261	SURECOREATSULTR11	388	-	GTCCC	(Motif sequence only)
Vc9p318.12	UGT73C6(Vc9p318.12)	TF_motif_seq_0261	SURECOREATSULTR11	402	-	GTCAC	(Motif sequence only)
Vc9p318.12	UGT73C6(Vc9p318.12)	TF_motif_seq_0261	SURECOREATSULTR11	429	-	GTCAC	(Motif sequence only)
Vc9p318.12	UGT73C6(Vc9p318.12)	TF_motif_seq_0261	SURECOREATSULTR11	453	+	GACAC	(Motif sequence only)
Vc9p318.12	UGT73C6(Vc9p318.12)	TF_motif_seq_0261	SURECOREATSULTR11	543	+	GTGAC	(Motif sequence only)
Vc9p318.12	UGT73C6(Vc9p318.12)	TF_motif_seq_0261	SURECOREATSULTR11	633	-	TTCTC	(Motif sequence only)
Vc9p318.12	UGT73C6(Vc9p318.12)	TF_motif_seq_0261	SURECOREATSULTR11	635	-	CTCTC	(Motif sequence only)
Vc9p318.12	UGT73C6(Vc9p318.12)	TF_motif_seq_0261	SURECOREATSULTR11	651	-	GTCGC	(Motif sequence only)
Vc9p318.12	UGT73C6(Vc9p318.12)	TF_motif_seq_0261	SURECOREATSULTR11	712	-	TTCTC	(Motif sequence only)
Vc9p318.12	UGT73C6(Vc9p318.12)	TF_motif_seq_0261	SURECOREATSULTR11	849	-	GTCTA	(Motif sequence only)
Vc9p318.12	UGT73C6(Vc9p318.12)	TF_motif_seq_0261	SURECOREATSULTR11	893	-	GTTTC	(Motif sequence only)
Vc9p318.12	UGT73C6(Vc9p318.12)	TF_motif_seq_0261	SURECOREATSULTR11	948	-	ATCTC	(Motif sequence only)
Vc9p318.12	UGT73C6(Vc9p318.12)	TF_motif_seq_0261	SURECOREATSULTR11	965	-	GTCTA	(Motif sequence only)
Vc9p318.12	UGT73C6(Vc9p318.12)	TF_motif_seq_0261	SURECOREATSULTR11	1005	-	TTCTC	(Motif sequence only)
Vc9p318.12	UGT73C6(Vc9p318.12)	TF_motif_seq_0261	SURECOREATSULTR11	1019	-	GTCTT	(Motif sequence only)
Vc9p318.12	UGT73C6(Vc9p318.12)	TF_motif_seq_0261	SURECOREATSULTR11	1073	-	ATCTC	(Motif sequence only)
Vc9p318.12	UGT73C6(Vc9p318.12)	TF_motif_seq_0261	SURECOREATSULTR11	1260	-	TTCTC	(Motif sequence only)
Vc9p318.12	UGT73C6(Vc9p318.12)	TF_motif_seq_0261	SURECOREATSULTR11	1278	-	ATCTC	(Motif sequence only)
Vc9p318.12	UGT73C6(Vc9p318.12)	TF_motif_seq_0261	SURECOREATSULTR11	1280	-	CTCTC	(Motif sequence only)
Vc9p318.12	UGT73C6(Vc9p318.12)	TF_motif_seq_0261	SURECOREATSULTR11	1371	-	GTCTA	(Motif sequence only)
Vc9p318.12	UGT73C6(Vc9p318.12)	TF_motif_seq_0261	SURECOREATSULTR11	1561	+	GAGAG	(Motif sequence only)
Vc9p318.12	UGT73C6(Vc9p318.12)	TF_motif_seq_0261	SURECOREATSULTR11	1563	+	GAGAG	(Motif sequence only)
Vc9p318.12	UGT73C6(Vc9p318.12)	TF_motif_seq_0261	SURECOREATSULTR11	1565	+	GAGAA	(Motif sequence only)
Vc9p318.12	UGT73C6(Vc9p318.12)	TF_motif_seq_0261	SURECOREATSULTR11	1573	+	GAGAA	(Motif sequence only)
Vc9p318.12	UGT73C6(Vc9p318.12)	TF_motif_seq_0261	SURECOREATSULTR11	1638	-	GTCTT	(Motif sequence only)
Vc9p318.12	UGT73C6(Vc9p318.12)	TF_motif_seq_0261	SURECOREATSULTR11	1667	+	GTGAC	(Motif sequence only)
Vc9p318.12	UGT73C6(Vc9p318.12)	TF_motif_seq_0261	SURECOREATSULTR11	1681	-	GCCTC	(Motif sequence only)
Vc9p318.12	UGT73C6(Vc9p318.12)	TF_motif_seq_0261	SURECOREATSULTR11	1781	+	GACAC	(Motif sequence only)
Vc9p318.12	UGT73C6(Vc9p318.12)	TF_motif_seq_0261	SURECOREATSULTR11	1801	-	ATCTC	(Motif sequence only)
Vc9p318.12	UGT73C6(Vc9p318.12)	TF_motif_seq_0261	SURECOREATSULTR11	1888	+	GAGAA	(Motif sequence only)
Vc9p318.12	UGT73C6(Vc9p318.12)	TF_motif_seq_0261	SURECOREATSULTR11	1901	-	TTCTC	(Motif sequence only)
Vc9p318.12	UGT73C6(Vc9p318.12)	TF_motif_seq_0261	SURECOREATSULTR11	1908	+	GAAAC	(Motif sequence only)
Vc9p318.12	UGT73C6(Vc9p318.12)	TF_motif_seq_0261	SURECOREATSULTR11	1924	+	AAGAC	(Motif sequence only)
Vc9p318.12	UGT73C6(Vc9p318.12)	TF_motif_seq_0261	SURECOREATSULTR11	1968	-	GTTTC	(Motif sequence only)
Vc9p318.12	UGT73C6(Vc9p318.12)	TF_motif_seq_0263	SORLIP1AT	5	-	GTGTC	(Motif sequence only)
Vc9p318.12	UGT73C6(Vc9p318.12)	TF_motif_seq_0263	SORLIP1AT	38	-	GTGGA	(Motif sequence only)
Vc9p318.12	UGT73C6(Vc9p318.12)	TF_motif_seq_0263	SORLIP1AT	145	+	CCCAC	(Motif sequence only)
Vc9p318.12	UGT73C6(Vc9p318.12)	TF_motif_seq_0263	SORLIP1AT	158	+	CCCAC	(Motif sequence only)
Vc9p318.12	UGT73C6(Vc9p318.12)	TF_motif_seq_0263	SORLIP1AT	211	-	GTGGG	(Motif sequence only)
Vc9p318.12	UGT73C6(Vc9p318.12)	TF_motif_seq_0263	SORLIP1AT	264	-	GGGGC	(Motif sequence only)
Vc9p318.12	UGT73C6(Vc9p318.12)	TF_motif_seq_0263	SORLIP1AT	328	-	GTGGG	(Motif sequence only)
Vc9p318.12	UGT73C6(Vc9p318.12)	TF_motif_seq_0263	SORLIP1AT	402	+	GTCAC	(Motif sequence only)
Vc9p318.12	UGT73C6(Vc9p318.12)	TF_motif_seq_0263	SORLIP1AT	410	+	ACCAC	(Motif sequence only)
Vc9p318.12	UGT73C6(Vc9p318.12)	TF_motif_seq_0263	SORLIP1AT	429	+	GTCAC	(Motif sequence only)
Vc9p318.12	UGT73C6(Vc9p318.12)	TF_motif_seq_0263	SORLIP1AT	437	+	ACCAC	(Motif sequence only)
Vc9p318.12	UGT73C6(Vc9p318.12)	TF_motif_seq_0263	SORLIP1AT	453	+	GACAC	(Motif sequence only)
Vc9p318.12	UGT73C6(Vc9p318.12)	TF_motif_seq_0263	SORLIP1AT	491	+	GCCAA	(Motif sequence only)
Vc9p318.12	UGT73C6(Vc9p318.12)	TF_motif_seq_0263	SORLIP1AT	505	-	GTGGA	(Motif sequence only)
Vc9p318.12	UGT73C6(Vc9p318.12)	TF_motif_seq_0263	SORLIP1AT	543	-	GTGAC	(Motif sequence only)
Vc9p318.12	UGT73C6(Vc9p318.12)	TF_motif_seq_0263	SORLIP1AT	557	-	GTGGT	(Motif sequence only)
Vc9p318.12	UGT73C6(Vc9p318.12)	TF_motif_seq_0263	SORLIP1AT	651	-	GTCGC	(Motif sequence only)
Vc9p318.12	UGT73C6(Vc9p318.12)	TF_motif_seq_0263	SORLIP1AT	752	-	TTGGC	(Motif sequence only)
Vc9p318.12	UGT73C6(Vc9p318.12)	TF_motif_seq_0263	SORLIP1AT	915	-	ATGGC	(Motif sequence only)
Vc9p318.12	UGT73C6(Vc9p318.12)	TF_motif_seq_0263	SORLIP1AT	1555	-	GGGGC	(Motif sequence only)
Vc9p318.12	UGT73C6(Vc9p318.12)	TF_motif_seq_0263	SORLIP1AT	1667	-	GTGAC	(Motif sequence only)
Vc9p318.12	UGT73C6(Vc9p318.12)	TF_motif_seq_0263	SORLIP1AT	1681	+	GCCTC	(Motif sequence only)
Vc9p318.12	UGT73C6(Vc9p318.12)	TF_motif_seq_0263	SORLIP1AT	1746	-	GTGGA	(Motif sequence only)
Vc9p318.12	UGT73C6(Vc9p318.12)	TF_motif_seq_0263	SORLIP1AT	1781	+	GACAC	(Motif sequence only)
Vc9p318.12	UGT73C6(Vc9p318.12)	TF_motif_seq_0263	SORLIP1AT	1791	+	GCCAA	(Motif sequence only)
Vc9p318.12	UGT73C6(Vc9p318.12)	TF_motif_seq_0263	SORLIP1AT	1818	+	GCAAC	(Motif sequence only)
Vc9p318.12	UGT73C6(Vc9p318.12)	TF_motif_seq_0263	SORLIP1AT	1876	+	GCAAC	(Motif sequence only)
Vc9p318.12	UGT73C6(Vc9p318.12)	TF_motif_seq_0265	SORLIP2AT	112	+	GGGAC	(Motif sequence only)
Vc9p318.12	UGT73C6(Vc9p318.12)	TF_motif_seq_0265	SORLIP2AT	113	+	GGACC	(Motif sequence only)
Vc9p318.12	UGT73C6(Vc9p318.12)	TF_motif_seq_0265	SORLIP2AT	113	-	GGACC	(Motif sequence only)
Vc9p318.12	UGT73C6(Vc9p318.12)	TF_motif_seq_0265	SORLIP2AT	141	+	GGGAC	(Motif sequence only)
Vc9p318.12	UGT73C6(Vc9p318.12)	TF_motif_seq_0265	SORLIP2AT	142	+	GGACC	(Motif sequence only)
Vc9p318.12	UGT73C6(Vc9p318.12)	TF_motif_seq_0265	SORLIP2AT	142	-	GGACC	(Motif sequence only)
Vc9p318.12	UGT73C6(Vc9p318.12)	TF_motif_seq_0265	SORLIP2AT	143	-	GACCC	(Motif sequence only)
Vc9p318.12	UGT73C6(Vc9p318.12)	TF_motif_seq_0265	SORLIP2AT	154	+	GGGTC	(Motif sequence only)
Vc9p318.12	UGT73C6(Vc9p318.12)	TF_motif_seq_0265	SORLIP2AT	155	+	GGTCC	(Motif sequence only)
Vc9p318.12	UGT73C6(Vc9p318.12)	TF_motif_seq_0265	SORLIP2AT	155	-	GGTCC	(Motif sequence only)
Vc9p318.12	UGT73C6(Vc9p318.12)	TF_motif_seq_0265	SORLIP2AT	156	-	GTCCC	(Motif sequence only)
Vc9p318.12	UGT73C6(Vc9p318.12)	TF_motif_seq_0265	SORLIP2AT	239	+	GGTCC	(Motif sequence only)
Vc9p318.12	UGT73C6(Vc9p318.12)	TF_motif_seq_0265	SORLIP2AT	239	-	GGTCC	(Motif sequence only)
Vc9p318.12	UGT73C6(Vc9p318.12)	TF_motif_seq_0265	SORLIP2AT	264	+	GGGGC	(Motif sequence only)
Vc9p318.12	UGT73C6(Vc9p318.12)	TF_motif_seq_0265	SORLIP2AT	265	+	GGGCC	(Motif sequence only)
Vc9p318.12	UGT73C6(Vc9p318.12)	TF_motif_seq_0265	SORLIP2AT	265	-	GGGCC	(Motif sequence only)
Vc9p318.12	UGT73C6(Vc9p318.12)	TF_motif_seq_0265	SORLIP2AT	266	+	GGCCC	(Motif sequence only)
Vc9p318.12	UGT73C6(Vc9p318.12)	TF_motif_seq_0265	SORLIP2AT	266	-	GGCCC	(Motif sequence only)
Vc9p318.12	UGT73C6(Vc9p318.12)	TF_motif_seq_0265	SORLIP2AT	319	-	GACCC	(Motif sequence only)
Vc9p318.12	UGT73C6(Vc9p318.12)	TF_motif_seq_0265	SORLIP2AT	330	+	GGGTC	(Motif sequence only)
Vc9p318.12	UGT73C6(Vc9p318.12)	TF_motif_seq_0265	SORLIP2AT	331	+	GGTCC	(Motif sequence only)
Vc9p318.12	UGT73C6(Vc9p318.12)	TF_motif_seq_0265	SORLIP2AT	331	-	GGTCC	(Motif sequence only)
Vc9p318.12	UGT73C6(Vc9p318.12)	TF_motif_seq_0265	SORLIP2AT	332	-	GTCCC	(Motif sequence only)
Vc9p318.12	UGT73C6(Vc9p318.12)	TF_motif_seq_0265	SORLIP2AT	360	+	GGTCC	(Motif sequence only)
Vc9p318.12	UGT73C6(Vc9p318.12)	TF_motif_seq_0265	SORLIP2AT	360	-	GGTCC	(Motif sequence only)
Vc9p318.12	UGT73C6(Vc9p318.12)	TF_motif_seq_0265	SORLIP2AT	361	-	GTCCC	(Motif sequence only)
Vc9p318.12	UGT73C6(Vc9p318.12)	TF_motif_seq_0265	SORLIP2AT	386	+	GGGTC	(Motif sequence only)
Vc9p318.12	UGT73C6(Vc9p318.12)	TF_motif_seq_0265	SORLIP2AT	387	+	GGTCC	(Motif sequence only)
Vc9p318.12	UGT73C6(Vc9p318.12)	TF_motif_seq_0265	SORLIP2AT	387	-	GGTCC	(Motif sequence only)
Vc9p318.12	UGT73C6(Vc9p318.12)	TF_motif_seq_0265	SORLIP2AT	388	-	GTCCC	(Motif sequence only)
Vc9p318.12	UGT73C6(Vc9p318.12)	TF_motif_seq_0265	SORLIP2AT	559	+	GGTCC	(Motif sequence only)
Vc9p318.12	UGT73C6(Vc9p318.12)	TF_motif_seq_0265	SORLIP2AT	559	-	GGTCC	(Motif sequence only)
Vc9p318.12	UGT73C6(Vc9p318.12)	TF_motif_seq_0265	SORLIP2AT	1555	+	GGGGC	(Motif sequence only)
Vc9p318.12	UGT73C6(Vc9p318.12)	TF_motif_seq_0265	SORLIP2AT	1556	+	GGGCA	(Motif sequence only)
Vc9p318.12	UGT73C6(Vc9p318.12)	TF_motif_seq_0265	SORLIP2AT	1934	-	CGCCC	(Motif sequence only)
Vc9p318.12	UGT73C6(Vc9p318.12)	TF_motif_seq_0268	ARR1AT	90	-	AATCC	(Motif sequence only)
Vc9p318.12	UGT73C6(Vc9p318.12)	TF_motif_seq_0268	ARR1AT	107	+	AGATT	(Motif sequence only)
Vc9p318.12	UGT73C6(Vc9p318.12)	TF_motif_seq_0268	ARR1AT	129	+	CGATT	(Motif sequence only)
Vc9p318.12	UGT73C6(Vc9p318.12)	TF_motif_seq_0268	ARR1AT	200	+	TGATT	(Motif sequence only)
Vc9p318.12	UGT73C6(Vc9p318.12)	TF_motif_seq_0268	ARR1AT	366	-	AATCT	(Motif sequence only)
Vc9p318.12	UGT73C6(Vc9p318.12)	TF_motif_seq_0268	ARR1AT	484	+	TGATT	(Motif sequence only)
Vc9p318.12	UGT73C6(Vc9p318.12)	TF_motif_seq_0268	ARR1AT	623	+	AGATT	(Motif sequence only)
Vc9p318.12	UGT73C6(Vc9p318.12)	TF_motif_seq_0268	ARR1AT	661	-	AATCT	(Motif sequence only)
Vc9p318.12	UGT73C6(Vc9p318.12)	TF_motif_seq_0268	ARR1AT	691	-	AATCT	(Motif sequence only)
Vc9p318.12	UGT73C6(Vc9p318.12)	TF_motif_seq_0268	ARR1AT	1028	-	AATCT	(Motif sequence only)
Vc9p318.12	UGT73C6(Vc9p318.12)	TF_motif_seq_0268	ARR1AT	1072	-	AATCT	(Motif sequence only)
Vc9p318.12	UGT73C6(Vc9p318.12)	TF_motif_seq_0268	ARR1AT	1099	-	AATCT	(Motif sequence only)
Vc9p318.12	UGT73C6(Vc9p318.12)	TF_motif_seq_0268	ARR1AT	1270	+	GGATT	(Motif sequence only)
Vc9p318.12	UGT73C6(Vc9p318.12)	TF_motif_seq_0268	ARR1AT	1309	+	TGATT	(Motif sequence only)
Vc9p318.12	UGT73C6(Vc9p318.12)	TF_motif_seq_0268	ARR1AT	1687	+	TGATT	(Motif sequence only)
Vc9p318.12	UGT73C6(Vc9p318.12)	TF_motif_seq_0268	ARR1AT	1800	-	AATCT	(Motif sequence only)
Vc9p318.12	UGT73C6(Vc9p318.12)	TF_motif_seq_0268	ARR1AT	1832	-	AATCA	(Motif sequence only)
Vc9p318.12	UGT73C6(Vc9p318.12)	TF_motif_seq_0268	ARR1AT	1856	-	AATCA	(Motif sequence only)
Vc9p318.12	UGT73C6(Vc9p318.12)	TF_motif_seq_0268	ARR1AT	1872	-	AATCG	(Motif sequence only)
Vc9p318.12	UGT73C6(Vc9p318.12)	TF_motif_seq_0274	BIHD1OS	6	+	TGTCC	(Motif sequence only)
Vc9p318.12	UGT73C6(Vc9p318.12)	TF_motif_seq_0274	BIHD1OS	18	-	GGACA	(Motif sequence only)
Vc9p318.12	UGT73C6(Vc9p318.12)	TF_motif_seq_0274	BIHD1OS	74	-	TGACT	(Motif sequence only)
Vc9p318.12	UGT73C6(Vc9p318.12)	TF_motif_seq_0274	BIHD1OS	204	-	TGAAA	(Motif sequence only)
Vc9p318.12	UGT73C6(Vc9p318.12)	TF_motif_seq_0274	BIHD1OS	224	-	TTACA	(Motif sequence only)
Vc9p318.12	UGT73C6(Vc9p318.12)	TF_motif_seq_0274	BIHD1OS	252	-	TGAAA	(Motif sequence only)
Vc9p318.12	UGT73C6(Vc9p318.12)	TF_motif_seq_0274	BIHD1OS	314	+	TGTGA	(Motif sequence only)
Vc9p318.12	UGT73C6(Vc9p318.12)	TF_motif_seq_0274	BIHD1OS	316	-	TGAGA	(Motif sequence only)
Vc9p318.12	UGT73C6(Vc9p318.12)	TF_motif_seq_0274	BIHD1OS	401	+	GGTCA	(Motif sequence only)
Vc9p318.12	UGT73C6(Vc9p318.12)	TF_motif_seq_0274	BIHD1OS	403	-	TCACA	(Motif sequence only)
Vc9p318.12	UGT73C6(Vc9p318.12)	TF_motif_seq_0274	BIHD1OS	428	+	CGTCA	(Motif sequence only)
Vc9p318.12	UGT73C6(Vc9p318.12)	TF_motif_seq_0274	BIHD1OS	430	-	TCACA	(Motif sequence only)
Vc9p318.12	UGT73C6(Vc9p318.12)	TF_motif_seq_0274	BIHD1OS	452	-	CGACA	(Motif sequence only)
Vc9p318.12	UGT73C6(Vc9p318.12)	TF_motif_seq_0274	BIHD1OS	523	+	TATCA	(Motif sequence only)
Vc9p318.12	UGT73C6(Vc9p318.12)	TF_motif_seq_0274	BIHD1OS	538	-	TGATA	(Motif sequence only)
Vc9p318.12	UGT73C6(Vc9p318.12)	TF_motif_seq_0274	BIHD1OS	544	-	TGACT	(Motif sequence only)
Vc9p318.12	UGT73C6(Vc9p318.12)	TF_motif_seq_0274	BIHD1OS	607	-	TTACA	(Motif sequence only)
Vc9p318.12	UGT73C6(Vc9p318.12)	TF_motif_seq_0274	BIHD1OS	614	+	TGTTA	(Motif sequence only)
Vc9p318.12	UGT73C6(Vc9p318.12)	TF_motif_seq_0274	BIHD1OS	656	-	TGACT	(Motif sequence only)
Vc9p318.12	UGT73C6(Vc9p318.12)	TF_motif_seq_0274	BIHD1OS	725	+	TGTAA	(Motif sequence only)
Vc9p318.12	UGT73C6(Vc9p318.12)	TF_motif_seq_0274	BIHD1OS	739	-	TGAAA	(Motif sequence only)
Vc9p318.12	UGT73C6(Vc9p318.12)	TF_motif_seq_0274	BIHD1OS	780	+	TATCA	(Motif sequence only)
Vc9p318.12	UGT73C6(Vc9p318.12)	TF_motif_seq_0274	BIHD1OS	786	-	TGATA	(Motif sequence only)
Vc9p318.12	UGT73C6(Vc9p318.12)	TF_motif_seq_0274	BIHD1OS	848	+	TGTCT	(Motif sequence only)
Vc9p318.12	UGT73C6(Vc9p318.12)	TF_motif_seq_0274	BIHD1OS	863	-	TGAAA	(Motif sequence only)
Vc9p318.12	UGT73C6(Vc9p318.12)	TF_motif_seq_0274	BIHD1OS	894	+	TTTCA	(Motif sequence only)
Vc9p318.12	UGT73C6(Vc9p318.12)	TF_motif_seq_0274	BIHD1OS	896	-	TCACA	(Motif sequence only)
Vc9p318.12	UGT73C6(Vc9p318.12)	TF_motif_seq_0274	BIHD1OS	916	+	TGGCA	(Motif sequence only)
Vc9p318.12	UGT73C6(Vc9p318.12)	TF_motif_seq_0274	BIHD1OS	916	-	TGGCA	(Motif sequence only)
Vc9p318.12	UGT73C6(Vc9p318.12)	TF_motif_seq_0274	BIHD1OS	940	-	TGAAA	(Motif sequence only)
Vc9p318.12	UGT73C6(Vc9p318.12)	TF_motif_seq_0274	BIHD1OS	964	+	TGTCT	(Motif sequence only)
Vc9p318.12	UGT73C6(Vc9p318.12)	TF_motif_seq_0274	BIHD1OS	1018	+	TGTCT	(Motif sequence only)
Vc9p318.12	UGT73C6(Vc9p318.12)	TF_motif_seq_0274	BIHD1OS	1034	+	TGTTA	(Motif sequence only)
Vc9p318.12	UGT73C6(Vc9p318.12)	TF_motif_seq_0274	BIHD1OS	1106	-	TGACT	(Motif sequence only)
Vc9p318.12	UGT73C6(Vc9p318.12)	TF_motif_seq_0274	BIHD1OS	1161	+	TGTCA	(Motif sequence only)
Vc9p318.12	UGT73C6(Vc9p318.12)	TF_motif_seq_0274	BIHD1OS	1161	-	TGTCA	(Motif sequence only)
Vc9p318.12	UGT73C6(Vc9p318.12)	TF_motif_seq_0274	BIHD1OS	1171	+	TGTCA	(Motif sequence only)
Vc9p318.12	UGT73C6(Vc9p318.12)	TF_motif_seq_0274	BIHD1OS	1171	-	TGTCA	(Motif sequence only)
Vc9p318.12	UGT73C6(Vc9p318.12)	TF_motif_seq_0274	BIHD1OS	1233	-	TGAAA	(Motif sequence only)
Vc9p318.12	UGT73C6(Vc9p318.12)	TF_motif_seq_0274	BIHD1OS	1391	+	TGACA	(Motif sequence only)
Vc9p318.12	UGT73C6(Vc9p318.12)	TF_motif_seq_0274	BIHD1OS	1391	-	TGACA	(Motif sequence only)
Vc9p318.12	UGT73C6(Vc9p318.12)	TF_motif_seq_0274	BIHD1OS	1407	-	TGACT	(Motif sequence only)
Vc9p318.12	UGT73C6(Vc9p318.12)	TF_motif_seq_0274	BIHD1OS	1426	+	TGTAA	(Motif sequence only)
Vc9p318.12	UGT73C6(Vc9p318.12)	TF_motif_seq_0274	BIHD1OS	1474	-	TTACA	(Motif sequence only)
Vc9p318.12	UGT73C6(Vc9p318.12)	TF_motif_seq_0274	BIHD1OS	1490	-	TAACA	(Motif sequence only)
Vc9p318.12	UGT73C6(Vc9p318.12)	TF_motif_seq_0274	BIHD1OS	1626	+	TGTAA	(Motif sequence only)
Vc9p318.12	UGT73C6(Vc9p318.12)	TF_motif_seq_0274	BIHD1OS	1643	-	TGAAA	(Motif sequence only)
Vc9p318.12	UGT73C6(Vc9p318.12)	TF_motif_seq_0274	BIHD1OS	1649	-	TGACT	(Motif sequence only)
Vc9p318.12	UGT73C6(Vc9p318.12)	TF_motif_seq_0274	BIHD1OS	1668	-	TGACT	(Motif sequence only)
Vc9p318.12	UGT73C6(Vc9p318.12)	TF_motif_seq_0274	BIHD1OS	1673	+	AGTCA	(Motif sequence only)
Vc9p318.12	UGT73C6(Vc9p318.12)	TF_motif_seq_0274	BIHD1OS	1725	+	TATCA	(Motif sequence only)
Vc9p318.12	UGT73C6(Vc9p318.12)	TF_motif_seq_0274	BIHD1OS	1731	+	TGTGA	(Motif sequence only)
Vc9p318.12	UGT73C6(Vc9p318.12)	TF_motif_seq_0274	BIHD1OS	1780	-	CGACA	(Motif sequence only)
Vc9p318.12	UGT73C6(Vc9p318.12)	TF_motif_seq_0274	BIHD1OS	1814	-	TGACG	(Motif sequence only)
Vc9p318.12	UGT73C6(Vc9p318.12)	TF_motif_seq_0274	BIHD1OS	1834	-	TCACA	(Motif sequence only)
Vc9p318.12	UGT73C6(Vc9p318.12)	TF_motif_seq_0274	BIHD1OS	1867	-	TCACA	(Motif sequence only)
Vc9p318.12	UGT73C6(Vc9p318.12)	TF_motif_seq_0274	BIHD1OS	1969	+	TTTCA	(Motif sequence only)
Vc9p318.12	UGT73C6(Vc9p318.12)	TF_motif_seq_0274	BIHD1OS	1986	+	AGTCA	(Motif sequence only)
Vc9p318.12	UGT73C6(Vc9p318.12)	TF_motif_seq_0275	WBOXATNPR1	17	+	TGGAC	(Motif sequence only)
Vc9p318.12	UGT73C6(Vc9p318.12)	TF_motif_seq_0275	WBOXATNPR1	51	-	GTTAA	(Motif sequence only)
Vc9p318.12	UGT73C6(Vc9p318.12)	TF_motif_seq_0275	WBOXATNPR1	73	+	TTGAC	(Motif sequence only)
Vc9p318.12	UGT73C6(Vc9p318.12)	TF_motif_seq_0275	WBOXATNPR1	80	+	TTGAA	(Motif sequence only)
Vc9p318.12	UGT73C6(Vc9p318.12)	TF_motif_seq_0275	WBOXATNPR1	199	+	TTGAT	(Motif sequence only)
Vc9p318.12	UGT73C6(Vc9p318.12)	TF_motif_seq_0275	WBOXATNPR1	203	+	TTGAA	(Motif sequence only)
Vc9p318.12	UGT73C6(Vc9p318.12)	TF_motif_seq_0275	WBOXATNPR1	223	+	TTTAC	(Motif sequence only)
Vc9p318.12	UGT73C6(Vc9p318.12)	TF_motif_seq_0275	WBOXATNPR1	240	-	GTCCA	(Motif sequence only)
Vc9p318.12	UGT73C6(Vc9p318.12)	TF_motif_seq_0275	WBOXATNPR1	246	+	TTGAG	(Motif sequence only)
Vc9p318.12	UGT73C6(Vc9p318.12)	TF_motif_seq_0275	WBOXATNPR1	251	+	TTGAA	(Motif sequence only)
Vc9p318.12	UGT73C6(Vc9p318.12)	TF_motif_seq_0275	WBOXATNPR1	395	+	TTGAA	(Motif sequence only)
Vc9p318.12	UGT73C6(Vc9p318.12)	TF_motif_seq_0275	WBOXATNPR1	402	-	GTCAC	(Motif sequence only)
Vc9p318.12	UGT73C6(Vc9p318.12)	TF_motif_seq_0275	WBOXATNPR1	429	-	GTCAC	(Motif sequence only)
Vc9p318.12	UGT73C6(Vc9p318.12)	TF_motif_seq_0275	WBOXATNPR1	445	+	TTCAC	(Motif sequence only)
Vc9p318.12	UGT73C6(Vc9p318.12)	TF_motif_seq_0275	WBOXATNPR1	491	-	GCCAA	(Motif sequence only)
Vc9p318.12	UGT73C6(Vc9p318.12)	TF_motif_seq_0275	WBOXATNPR1	524	-	ATCAA	(Motif sequence only)
Vc9p318.12	UGT73C6(Vc9p318.12)	TF_motif_seq_0275	WBOXATNPR1	543	+	GTGAC	(Motif sequence only)
Vc9p318.12	UGT73C6(Vc9p318.12)	TF_motif_seq_0275	WBOXATNPR1	574	+	TTTAC	(Motif sequence only)
Vc9p318.12	UGT73C6(Vc9p318.12)	TF_motif_seq_0275	WBOXATNPR1	655	+	CTGAC	(Motif sequence only)
Vc9p318.12	UGT73C6(Vc9p318.12)	TF_motif_seq_0275	WBOXATNPR1	726	-	GTAAA	(Motif sequence only)
Vc9p318.12	UGT73C6(Vc9p318.12)	TF_motif_seq_0275	WBOXATNPR1	752	+	TTGGC	(Motif sequence only)
Vc9p318.12	UGT73C6(Vc9p318.12)	TF_motif_seq_0275	WBOXATNPR1	801	-	GTAAA	(Motif sequence only)
Vc9p318.12	UGT73C6(Vc9p318.12)	TF_motif_seq_0275	WBOXATNPR1	849	-	GTCTA	(Motif sequence only)
Vc9p318.12	UGT73C6(Vc9p318.12)	TF_motif_seq_0275	WBOXATNPR1	883	-	GTTAA	(Motif sequence only)
Vc9p318.12	UGT73C6(Vc9p318.12)	TF_motif_seq_0275	WBOXATNPR1	895	+	TTCAC	(Motif sequence only)
Vc9p318.12	UGT73C6(Vc9p318.12)	TF_motif_seq_0275	WBOXATNPR1	902	-	GTAAA	(Motif sequence only)
Vc9p318.12	UGT73C6(Vc9p318.12)	TF_motif_seq_0275	WBOXATNPR1	945	+	TTGAT	(Motif sequence only)
Vc9p318.12	UGT73C6(Vc9p318.12)	TF_motif_seq_0275	WBOXATNPR1	965	-	GTCTA	(Motif sequence only)
Vc9p318.12	UGT73C6(Vc9p318.12)	TF_motif_seq_0275	WBOXATNPR1	1017	+	TTGTC	(Motif sequence only)
Vc9p318.12	UGT73C6(Vc9p318.12)	TF_motif_seq_0275	WBOXATNPR1	1096	+	TTGAA	(Motif sequence only)
Vc9p318.12	UGT73C6(Vc9p318.12)	TF_motif_seq_0275	WBOXATNPR1	1105	+	ATGAC	(Motif sequence only)
Vc9p318.12	UGT73C6(Vc9p318.12)	TF_motif_seq_0275	WBOXATNPR1	1126	-	GGCAA	(Motif sequence only)
Vc9p318.12	UGT73C6(Vc9p318.12)	TF_motif_seq_0275	WBOXATNPR1	1160	+	TTGTC	(Motif sequence only)
Vc9p318.12	UGT73C6(Vc9p318.12)	TF_motif_seq_0275	WBOXATNPR1	1162	-	GTCAG	(Motif sequence only)
Vc9p318.12	UGT73C6(Vc9p318.12)	TF_motif_seq_0275	WBOXATNPR1	1170	+	TTGTC	(Motif sequence only)
Vc9p318.12	UGT73C6(Vc9p318.12)	TF_motif_seq_0275	WBOXATNPR1	1172	-	GTCAT	(Motif sequence only)
Vc9p318.12	UGT73C6(Vc9p318.12)	TF_motif_seq_0275	WBOXATNPR1	1305	+	TTGAT	(Motif sequence only)
Vc9p318.12	UGT73C6(Vc9p318.12)	TF_motif_seq_0275	WBOXATNPR1	1371	-	GTCTA	(Motif sequence only)
Vc9p318.12	UGT73C6(Vc9p318.12)	TF_motif_seq_0275	WBOXATNPR1	1390	+	TTGAC	(Motif sequence only)
Vc9p318.12	UGT73C6(Vc9p318.12)	TF_motif_seq_0275	WBOXATNPR1	1392	-	GACAA	(Motif sequence only)
Vc9p318.12	UGT73C6(Vc9p318.12)	TF_motif_seq_0275	WBOXATNPR1	1406	+	CTGAC	(Motif sequence only)
Vc9p318.12	UGT73C6(Vc9p318.12)	TF_motif_seq_0275	WBOXATNPR1	1458	+	TTCAC	(Motif sequence only)
Vc9p318.12	UGT73C6(Vc9p318.12)	TF_motif_seq_0275	WBOXATNPR1	1507	-	GTTAA	(Motif sequence only)
Vc9p318.12	UGT73C6(Vc9p318.12)	TF_motif_seq_0275	WBOXATNPR1	1642	+	TTGAA	(Motif sequence only)
Vc9p318.12	UGT73C6(Vc9p318.12)	TF_motif_seq_0275	WBOXATNPR1	1648	+	ATGAC	(Motif sequence only)
Vc9p318.12	UGT73C6(Vc9p318.12)	TF_motif_seq_0275	WBOXATNPR1	1667	+	GTGAC	(Motif sequence only)
Vc9p318.12	UGT73C6(Vc9p318.12)	TF_motif_seq_0275	WBOXATNPR1	1674	-	GTCAT	(Motif sequence only)
Vc9p318.12	UGT73C6(Vc9p318.12)	TF_motif_seq_0275	WBOXATNPR1	1679	+	TTGCC	(Motif sequence only)
Vc9p318.12	UGT73C6(Vc9p318.12)	TF_motif_seq_0275	WBOXATNPR1	1710	-	ATCAA	(Motif sequence only)
Vc9p318.12	UGT73C6(Vc9p318.12)	TF_motif_seq_0275	WBOXATNPR1	1732	-	GTGAA	(Motif sequence only)
Vc9p318.12	UGT73C6(Vc9p318.12)	TF_motif_seq_0275	WBOXATNPR1	1758	-	GTAAA	(Motif sequence only)
Vc9p318.12	UGT73C6(Vc9p318.12)	TF_motif_seq_0275	WBOXATNPR1	1791	-	GCCAA	(Motif sequence only)
Vc9p318.12	UGT73C6(Vc9p318.12)	TF_motif_seq_0275	WBOXATNPR1	1813	+	ATGAC	(Motif sequence only)
Vc9p318.12	UGT73C6(Vc9p318.12)	TF_motif_seq_0275	WBOXATNPR1	1857	-	ATCAA	(Motif sequence only)
Vc9p318.12	UGT73C6(Vc9p318.12)	TF_motif_seq_0275	WBOXATNPR1	1866	+	TTCAC	(Motif sequence only)
Vc9p318.12	UGT73C6(Vc9p318.12)	TF_motif_seq_0275	WBOXATNPR1	1893	-	CTCAA	(Motif sequence only)
Vc9p318.12	UGT73C6(Vc9p318.12)	TF_motif_seq_0275	WBOXATNPR1	1921	-	CTCAA	(Motif sequence only)
Vc9p318.12	UGT73C6(Vc9p318.12)	TF_motif_seq_0275	WBOXATNPR1	1940	-	GTGAA	(Motif sequence only)
Vc9p318.12	UGT73C6(Vc9p318.12)	TF_motif_seq_0275	WBOXATNPR1	1970	+	TTCAC	(Motif sequence only)
Vc9p318.12	UGT73C6(Vc9p318.12)	TF_motif_seq_0275	WBOXATNPR1	1982	-	CTCAA	(Motif sequence only)
Vc9p318.12	UGT73C6(Vc9p318.12)	TF_motif_seq_0275	WBOXATNPR1	1987	-	GTCAA	(Motif sequence only)
Vc9p318.12	UGT73C6(Vc9p318.12)	TF_motif_seq_0276	OSE1ROOTNODULE	474	-	aTCTTT	(Motif sequence only)
Vc9p318.12	UGT73C6(Vc9p318.12)	TF_motif_seq_0276	OSE1ROOTNODULE	1001	-	aTCTTT	(Motif sequence only)
Vc9p318.12	UGT73C6(Vc9p318.12)	TF_motif_seq_0276	OSE1ROOTNODULE	1380	-	aTCTTT	(Motif sequence only)
Vc9p318.12	UGT73C6(Vc9p318.12)	TF_motif_seq_0276	OSE1ROOTNODULE	1608	+	AAAGAt	(Motif sequence only)
Vc9p318.12	UGT73C6(Vc9p318.12)	TF_motif_seq_0279	T/GBOXATPIN2	2	+	AACGTg	(Motif sequence only)
Vc9p318.12	UGT73C6(Vc9p318.12)	TF_motif_seq_0283	POLASIG3	183	-	aTTATT	(Motif sequence only)
Vc9p318.12	UGT73C6(Vc9p318.12)	TF_motif_seq_0283	POLASIG3	289	+	AATAAt	(Motif sequence only)
Vc9p318.12	UGT73C6(Vc9p318.12)	TF_motif_seq_0283	POLASIG3	683	+	AATAAa	(Motif sequence only)
Vc9p318.12	UGT73C6(Vc9p318.12)	TF_motif_seq_0283	POLASIG3	703	-	aTTATT	(Motif sequence only)
Vc9p318.12	UGT73C6(Vc9p318.12)	TF_motif_seq_0283	POLASIG3	706	-	aTTATT	(Motif sequence only)
Vc9p318.12	UGT73C6(Vc9p318.12)	TF_motif_seq_0283	POLASIG3	817	+	AATAAt	(Motif sequence only)
Vc9p318.12	UGT73C6(Vc9p318.12)	TF_motif_seq_0283	POLASIG3	838	-	aTTATT	(Motif sequence only)
Vc9p318.12	UGT73C6(Vc9p318.12)	TF_motif_seq_0283	POLASIG3	1035	-	gTTATT	(Motif sequence only)
Vc9p318.12	UGT73C6(Vc9p318.12)	TF_motif_seq_0283	POLASIG3	1042	-	cTTATT	(Motif sequence only)
Vc9p318.12	UGT73C6(Vc9p318.12)	TF_motif_seq_0283	POLASIG3	1065	-	aTTATT	(Motif sequence only)
Vc9p318.12	UGT73C6(Vc9p318.12)	TF_motif_seq_0283	POLASIG3	1090	-	tTTATT	(Motif sequence only)
Vc9p318.12	UGT73C6(Vc9p318.12)	TF_motif_seq_0283	POLASIG3	1135	+	AATAAc	(Motif sequence only)
Vc9p318.12	UGT73C6(Vc9p318.12)	TF_motif_seq_0283	POLASIG3	1166	-	gTTATT	(Motif sequence only)
Vc9p318.12	UGT73C6(Vc9p318.12)	TF_motif_seq_0283	POLASIG3	1311	-	aTTATT	(Motif sequence only)
Vc9p318.12	UGT73C6(Vc9p318.12)	TF_motif_seq_0283	POLASIG3	1568	+	AATAAg	(Motif sequence only)
Vc9p318.12	UGT73C6(Vc9p318.12)	TF_motif_seq_0283	POLASIG3	1691	-	tTTATT	(Motif sequence only)
Vc9p318.12	UGT73C6(Vc9p318.12)	TF_motif_seq_0283	POLASIG3	1765	-	tTTATT	(Motif sequence only)
Vc9p318.12	UGT73C6(Vc9p318.12)	TF_motif_seq_0283	POLASIG3	1955	-	aTTATT	(Motif sequence only)
Vc9p318.12	UGT73C6(Vc9p318.12)	TF_motif_seq_0284	DRE2COREZMRAB17	423	+	ACCGAc	(Motif sequence only)
Vc9p318.12	UGT73C6(Vc9p318.12)	TF_motif_seq_0290	TBOXATGAPB	34	-	cAAAGT	(Motif sequence only)
Vc9p318.12	UGT73C6(Vc9p318.12)	TF_motif_seq_0290	TBOXATGAPB	68	-	cAAAGT	(Motif sequence only)
Vc9p318.12	UGT73C6(Vc9p318.12)	TF_motif_seq_0297	CAREOSREP1	248	-	gAGTTG	(Motif sequence only)
Vc9p318.12	UGT73C6(Vc9p318.12)	TF_motif_seq_0303	CATATGGMSAUR	805	-	aATATG	(Motif sequence only)
Vc9p318.12	UGT73C6(Vc9p318.12)	TF_motif_seq_0303	CATATGGMSAUR	820	-	aATATG	(Motif sequence only)
Vc9p318.12	UGT73C6(Vc9p318.12)	TF_motif_seq_0309	PYRIMIDINEBOXOSRAMY1A	391	+	CCTTTt	(Motif sequence only)
Vc9p318.12	UGT73C6(Vc9p318.12)	TF_motif_seq_0309	PYRIMIDINEBOXOSRAMY1A	1051	-	aAAAGG	(Motif sequence only)
Vc9p318.12	UGT73C6(Vc9p318.12)	TF_motif_seq_0309	PYRIMIDINEBOXOSRAMY1A	1400	+	CCTTTt	(Motif sequence only)
Vc9p318.12	UGT73C6(Vc9p318.12)	TF_motif_seq_0315	GT1GMSCAM4	981	-	tTTTTC	(Motif sequence only)
Vc9p318.12	UGT73C6(Vc9p318.12)	TF_motif_seq_0315	GT1GMSCAM4	1131	+	GAAAAa	(Motif sequence only)
Vc9p318.12	UGT73C6(Vc9p318.12)	TF_motif_seq_0315	GT1GMSCAM4	1383	-	tTTTTC	(Motif sequence only)
Vc9p318.12	UGT73C6(Vc9p318.12)	TF_motif_seq_0315	GT1GMSCAM4	1480	-	tTTTTC	(Motif sequence only)
Vc9p318.12	UGT73C6(Vc9p318.12)	TF_motif_seq_0315	GT1GMSCAM4	1512	-	tTTTTC	(Motif sequence only)
Vc9p318.12	UGT73C6(Vc9p318.12)	TF_motif_seq_0317	IBOX	907	-	cTTATC	(Motif sequence only)
Vc9p318.12	UGT73C6(Vc9p318.12)	TF_motif_seq_0317	IBOX	1151	-	cTTATC	(Motif sequence only)
Vc9p318.12	UGT73C6(Vc9p318.12)	TF_motif_seq_0317	IBOX	1254	-	cTTATC	(Motif sequence only)
Vc9p318.12	UGT73C6(Vc9p318.12)	TF_motif_seq_0317	IBOX	1723	-	cTTATC	(Motif sequence only)
Vc9p318.12	UGT73C6(Vc9p318.12)	TF_motif_seq_0321	GT1CONSENSUS	86	+	GGAAAa	(Motif sequence only)
Vc9p318.12	UGT73C6(Vc9p318.12)	TF_motif_seq_0321	GT1CONSENSUS	87	+	GAAAAt	(Motif sequence only)
Vc9p318.12	UGT73C6(Vc9p318.12)	TF_motif_seq_0321	GT1CONSENSUS	119	+	GAAAAt	(Motif sequence only)
Vc9p318.12	UGT73C6(Vc9p318.12)	TF_motif_seq_0321	GT1CONSENSUS	273	+	GGAAAt	(Motif sequence only)
Vc9p318.12	UGT73C6(Vc9p318.12)	TF_motif_seq_0321	GT1CONSENSUS	353	-	aTTTTC	(Motif sequence only)
Vc9p318.12	UGT73C6(Vc9p318.12)	TF_motif_seq_0321	GT1CONSENSUS	515	+	GAAAAt	(Motif sequence only)
Vc9p318.12	UGT73C6(Vc9p318.12)	TF_motif_seq_0321	GT1CONSENSUS	521	-	aTTATC	(Motif sequence only)
Vc9p318.12	UGT73C6(Vc9p318.12)	TF_motif_seq_0321	GT1CONSENSUS	584	-	aTTTTC	(Motif sequence only)
Vc9p318.12	UGT73C6(Vc9p318.12)	TF_motif_seq_0321	GT1CONSENSUS	585	-	tTTTCC	(Motif sequence only)
Vc9p318.12	UGT73C6(Vc9p318.12)	TF_motif_seq_0321	GT1CONSENSUS	679	+	GGAAAa	(Motif sequence only)
Vc9p318.12	UGT73C6(Vc9p318.12)	TF_motif_seq_0321	GT1CONSENSUS	680	+	GAAAAt	(Motif sequence only)
Vc9p318.12	UGT73C6(Vc9p318.12)	TF_motif_seq_0321	GT1CONSENSUS	709	-	aTTTTC	(Motif sequence only)
Vc9p318.12	UGT73C6(Vc9p318.12)	TF_motif_seq_0321	GT1CONSENSUS	778	-	aTTATC	(Motif sequence only)
Vc9p318.12	UGT73C6(Vc9p318.12)	TF_motif_seq_0321	GT1CONSENSUS	901	+	GGTAAa	(Motif sequence only)
Vc9p318.12	UGT73C6(Vc9p318.12)	TF_motif_seq_0321	GT1CONSENSUS	981	-	tTTTTC	(Motif sequence only)
Vc9p318.12	UGT73C6(Vc9p318.12)	TF_motif_seq_0321	GT1CONSENSUS	1049	+	GGAAAa	(Motif sequence only)
Vc9p318.12	UGT73C6(Vc9p318.12)	TF_motif_seq_0321	GT1CONSENSUS	1131	+	GAAAAa	(Motif sequence only)
Vc9p318.12	UGT73C6(Vc9p318.12)	TF_motif_seq_0321	GT1CONSENSUS	1146	-	tTTATC	(Motif sequence only)
Vc9p318.12	UGT73C6(Vc9p318.12)	TF_motif_seq_0321	GT1CONSENSUS	1219	-	aTTTTC	(Motif sequence only)
Vc9p318.12	UGT73C6(Vc9p318.12)	TF_motif_seq_0321	GT1CONSENSUS	1234	+	GAAAAt	(Motif sequence only)
Vc9p318.12	UGT73C6(Vc9p318.12)	TF_motif_seq_0321	GT1CONSENSUS	1314	-	aTTTTC	(Motif sequence only)
Vc9p318.12	UGT73C6(Vc9p318.12)	TF_motif_seq_0321	GT1CONSENSUS	1377	-	aTTATC	(Motif sequence only)
Vc9p318.12	UGT73C6(Vc9p318.12)	TF_motif_seq_0321	GT1CONSENSUS	1383	-	tTTTTC	(Motif sequence only)
Vc9p318.12	UGT73C6(Vc9p318.12)	TF_motif_seq_0321	GT1CONSENSUS	1480	-	tTTTTC	(Motif sequence only)
Vc9p318.12	UGT73C6(Vc9p318.12)	TF_motif_seq_0321	GT1CONSENSUS	1512	-	tTTTTC	(Motif sequence only)
Vc9p318.12	UGT73C6(Vc9p318.12)	TF_motif_seq_0321	GT1CONSENSUS	1611	+	GATAAa	(Motif sequence only)
Vc9p318.12	UGT73C6(Vc9p318.12)	TF_motif_seq_0321	GT1CONSENSUS	1617	+	GGAAAa	(Motif sequence only)
Vc9p318.12	UGT73C6(Vc9p318.12)	TF_motif_seq_0321	GT1CONSENSUS	1618	+	GAAAAt	(Motif sequence only)
Vc9p318.12	UGT73C6(Vc9p318.12)	TF_motif_seq_0321	GT1CONSENSUS	1644	+	GAAAAt	(Motif sequence only)
Vc9p318.12	UGT73C6(Vc9p318.12)	TF_motif_seq_0321	GT1CONSENSUS	1797	+	GAAAAt	(Motif sequence only)
Vc9p318.12	UGT73C6(Vc9p318.12)	TF_motif_seq_0324	DRECRTCOREAT	383	-	GTCGGg	(Motif sequence only)
Vc9p318.12	UGT73C6(Vc9p318.12)	TF_motif_seq_0324	DRECRTCOREAT	423	+	aCCGAC	(Motif sequence only)
Vc9p318.12	UGT73C6(Vc9p318.12)	TF_motif_seq_0324	DRECRTCOREAT	450	+	gCCGAC	(Motif sequence only)
Vc9p318.12	UGT73C6(Vc9p318.12)	TF_motif_seq_0328	TATCCAOSAMY	39	-	tGGATA	(Motif sequence only)
Vc9p318.12	UGT73C6(Vc9p318.12)	TF_motif_seq_0328	TATCCAOSAMY	909	+	TATCCa	(Motif sequence only)
Vc9p318.12	UGT73C6(Vc9p318.12)	TF_motif_seq_0328	TATCCAOSAMY	1346	+	TATCCa	(Motif sequence only)
Vc9p318.12	UGT73C6(Vc9p318.12)	TF_motif_seq_0336	SREATMSD	908	+	TTATCc	(Motif sequence only)
Vc9p318.12	UGT73C6(Vc9p318.12)	TF_motif_seq_0340	CGCGBOXAT	96	+	ACGCGt	(Motif sequence only)
Vc9p318.12	UGT73C6(Vc9p318.12)	TF_motif_seq_0340	CGCGBOXAT	96	-	aCGCGT	(Motif sequence only)
Vc9p318.12	UGT73C6(Vc9p318.12)	TF_motif_seq_0341	MYB1AT	49	-	TGGTTa	(Motif sequence only)
Vc9p318.12	UGT73C6(Vc9p318.12)	TF_motif_seq_0341	MYB1AT	220	-	TGGTTt	(Motif sequence only)
Vc9p318.12	UGT73C6(Vc9p318.12)	TF_motif_seq_0341	MYB1AT	1860	+	aAACCA	(Motif sequence only)
Vc9p318.12	UGT73C6(Vc9p318.12)	TF_motif_seq_0342	MYB2CONSENSUSAT	21	-	CAGTTg	(Motif sequence only)
Vc9p318.12	UGT73C6(Vc9p318.12)	TF_motif_seq_0342	MYB2CONSENSUSAT	610	+	cAACTG	(Motif sequence only)
Vc9p318.12	UGT73C6(Vc9p318.12)	TF_motif_seq_0342	MYB2CONSENSUSAT	881	-	CAGTTa	(Motif sequence only)
Vc9p318.12	UGT73C6(Vc9p318.12)	TF_motif_seq_0342	MYB2CONSENSUSAT	1164	-	CAGTTa	(Motif sequence only)
Vc9p318.12	UGT73C6(Vc9p318.12)	TF_motif_seq_0343	ANAERO1CONSENSUS	277	-	atTGTTT	(Motif sequence only)
Vc9p318.12	UGT73C6(Vc9p318.12)	TF_motif_seq_0343	ANAERO1CONSENSUS	569	-	taTGTTT	(Motif sequence only)
Vc9p318.12	UGT73C6(Vc9p318.12)	TF_motif_seq_0343	ANAERO1CONSENSUS	1086	-	ctTGTTT	(Motif sequence only)
Vc9p318.12	UGT73C6(Vc9p318.12)	TF_motif_seq_0343	ANAERO1CONSENSUS	1142	-	ttTGTTT	(Motif sequence only)
Vc9p318.12	UGT73C6(Vc9p318.12)	TF_motif_seq_0343	ANAERO1CONSENSUS	1593	-	tgTGTTT	(Motif sequence only)
Vc9p318.12	UGT73C6(Vc9p318.12)	TF_motif_seq_0343	ANAERO1CONSENSUS	1826	+	AAACAta	(Motif sequence only)
Vc9p318.12	UGT73C6(Vc9p318.12)	TF_motif_seq_0343	ANAERO1CONSENSUS	1909	+	AAACAaa	(Motif sequence only)
Vc9p318.12	UGT73C6(Vc9p318.12)	TF_motif_seq_0343	ANAERO1CONSENSUS	1949	+	AAACAaa	(Motif sequence only)
Vc9p318.12	UGT73C6(Vc9p318.12)	TF_motif_seq_0344	AACACOREOSGLUB1	1115	-	ctTTGTT	(Motif sequence only)
Vc9p318.12	UGT73C6(Vc9p318.12)	TF_motif_seq_0344	AACACOREOSGLUB1	1141	-	gtTTGTT	(Motif sequence only)
Vc9p318.12	UGT73C6(Vc9p318.12)	TF_motif_seq_0344	AACACOREOSGLUB1	1395	+	AACAAcc	(Motif sequence only)
Vc9p318.12	UGT73C6(Vc9p318.12)	TF_motif_seq_0344	AACACOREOSGLUB1	1820	+	AACAAaa	(Motif sequence only)
Vc9p318.12	UGT73C6(Vc9p318.12)	TF_motif_seq_0344	AACACOREOSGLUB1	1910	+	AACAAac	(Motif sequence only)
Vc9p318.12	UGT73C6(Vc9p318.12)	TF_motif_seq_0344	AACACOREOSGLUB1	1950	+	AACAAat	(Motif sequence only)
Vc9p318.12	UGT73C6(Vc9p318.12)	TF_motif_seq_0346	RBCSCONSENSUS	90	+	AATCCta	(Motif sequence only)
Vc9p318.12	UGT73C6(Vc9p318.12)	TF_motif_seq_0346	RBCSCONSENSUS	1268	-	atGGATT	(Motif sequence only)
Vc9p318.12	UGT73C6(Vc9p318.12)	TF_motif_seq_0350	DRE1COREZMRAB17	1633	-	tcTAGGT	(Motif sequence only)
Vc9p318.12	UGT73C6(Vc9p318.12)	TF_motif_seq_0350	DRE1COREZMRAB17	1902	-	tcTCGGG	(Motif sequence only)
Vc9p318.12	UGT73C6(Vc9p318.12)	TF_motif_seq_0353	ACGTABREMOTIFA2OSEM	3	+	ACGTGtc	(Motif sequence only)
Vc9p318.12	UGT73C6(Vc9p318.12)	TF_motif_seq_0354	GADOWNAT	3	+	ACGTGtc	(Motif sequence only)
Vc9p318.12	UGT73C6(Vc9p318.12)	TF_motif_seq_0361	RYREPEATGMGY2	1809	-	atGCATG	(Motif sequence only)
Vc9p318.12	UGT73C6(Vc9p318.12)	TF_motif_seq_0362	RYREPEATLEGUMINBOX	1809	-	atGCATG	(Motif sequence only)
Vc9p318.12	UGT73C6(Vc9p318.12)	TF_motif_seq_0363	LEAFYATAG	107	-	agATTGG	(Motif sequence only)
Vc9p318.12	UGT73C6(Vc9p318.12)	TF_motif_seq_0363	LEAFYATAG	364	+	CCAATct	(Motif sequence only)
Vc9p318.12	UGT73C6(Vc9p318.12)	TF_motif_seq_0363	LEAFYATAG	492	+	CCAATga	(Motif sequence only)
Vc9p318.12	UGT73C6(Vc9p318.12)	TF_motif_seq_0363	LEAFYATAG	912	+	CCAATgg	(Motif sequence only)
Vc9p318.12	UGT73C6(Vc9p318.12)	TF_motif_seq_0366	MYBATRD22	967	+	CTAACta	(Motif sequence only)
Vc9p318.12	UGT73C6(Vc9p318.12)	TF_motif_seq_0366	MYBATRD22	1462	+	CTAACta	(Motif sequence only)
Vc9p318.12	UGT73C6(Vc9p318.12)	TF_motif_seq_0366	MYBATRD22	1495	+	CTAACta	(Motif sequence only)
Vc9p318.12	UGT73C6(Vc9p318.12)	TF_motif_seq_0366	MYBATRD22	1517	+	CTAACta	(Motif sequence only)
Vc9p318.12	UGT73C6(Vc9p318.12)	TF_motif_seq_0366	MYBATRD22	1521	+	CTAACta	(Motif sequence only)
Vc9p318.12	UGT73C6(Vc9p318.12)	TF_motif_seq_0366	MYBATRD22	1601	+	CTAACta	(Motif sequence only)
Vc9p318.12	UGT73C6(Vc9p318.12)	TF_motif_seq_0372	ACGTOSGLUB1	97	-	cgCGTAC	(Motif sequence only)
Vc9p318.12	UGT73C6(Vc9p318.12)	TF_motif_seq_0372	ACGTOSGLUB1	1178	-	caAGTAC	(Motif sequence only)
Vc9p318.12	UGT73C6(Vc9p318.12)	TF_motif_seq_0372	ACGTOSGLUB1	1754	+	GTACGta	(Motif sequence only)
Vc9p318.12	UGT73C6(Vc9p318.12)	TF_motif_seq_0373	MYB1LEPR	1460	-	caCTAAC	(Motif sequence only)
Vc9p318.12	UGT73C6(Vc9p318.12)	TF_motif_seq_0373	MYB1LEPR	1493	-	caCTAAC	(Motif sequence only)
Vc9p318.12	UGT73C6(Vc9p318.12)	TF_motif_seq_0373	MYB1LEPR	1519	-	aaCTAAC	(Motif sequence only)
Vc9p318.12	UGT73C6(Vc9p318.12)	TF_motif_seq_0374	ABRERATCAL	2	+	aACGTGt	(Motif sequence only)
Vc9p318.12	UGT73C6(Vc9p318.12)	TF_motif_seq_0375	SEF4MOTIFGM7S	280	+	gTTTTTa	(Motif sequence only)
Vc9p318.12	UGT73C6(Vc9p318.12)	TF_motif_seq_0377	GAREAT	1032	-	taTGTTA	(Motif sequence only)
Vc9p318.12	UGT73C6(Vc9p318.12)	TF_motif_seq_0378	GARE1OSREP1	612	-	acTGTTA	(Motif sequence only)
Vc9p318.12	UGT73C6(Vc9p318.12)	TF_motif_seq_0378	GARE1OSREP1	1032	-	taTGTTA	(Motif sequence only)
Vc9p318.12	UGT73C6(Vc9p318.12)	TF_motif_seq_0380	GARE2OSREP1	600	+	TAAAGta	(Motif sequence only)
Vc9p318.12	UGT73C6(Vc9p318.12)	TF_motif_seq_0380	GARE2OSREP1	617	+	TATCGta	(Motif sequence only)
Vc9p318.12	UGT73C6(Vc9p318.12)	TF_motif_seq_0380	GARE2OSREP1	1032	-	taTGTTA	(Motif sequence only)
Vc9p318.12	UGT73C6(Vc9p318.12)	TF_motif_seq_0380	GARE2OSREP1	1137	+	TAACGtt	(Motif sequence only)
Vc9p318.12	UGT73C6(Vc9p318.12)	TF_motif_seq_0380	GARE2OSREP1	1245	+	TAATGta	(Motif sequence only)
Vc9p318.12	UGT73C6(Vc9p318.12)	TF_motif_seq_0380	GARE2OSREP1	1323	+	TAACTta	(Motif sequence only)
Vc9p318.12	UGT73C6(Vc9p318.12)	TF_motif_seq_0380	GARE2OSREP1	1715	-	taCGATA	(Motif sequence only)
Vc9p318.12	UGT73C6(Vc9p318.12)	TF_motif_seq_0380	GARE2OSREP1	1755	-	taCGTAA	(Motif sequence only)
Vc9p318.12	UGT73C6(Vc9p318.12)	TF_motif_seq_0387	TATCCAYMOTIFOSRAMY3D	38	-	gtGGATA	(Motif sequence only)
Vc9p318.12	UGT73C6(Vc9p318.12)	TF_motif_seq_0387	TATCCAYMOTIFOSRAMY3D	909	+	TATCCaa	(Motif sequence only)
Vc9p318.12	UGT73C6(Vc9p318.12)	TF_motif_seq_0387	TATCCAYMOTIFOSRAMY3D	1346	+	TATCCaa	(Motif sequence only)
Vc9p318.12	UGT73C6(Vc9p318.12)	TF_motif_seq_0389	TATABOXOSPAL	525	-	tcAAATA	(Motif sequence only)
Vc9p318.12	UGT73C6(Vc9p318.12)	TF_motif_seq_0389	TATABOXOSPAL	739	-	tgAAATA	(Motif sequence only)
Vc9p318.12	UGT73C6(Vc9p318.12)	TF_motif_seq_0389	TATABOXOSPAL	744	+	TATTTaa	(Motif sequence only)
Vc9p318.12	UGT73C6(Vc9p318.12)	TF_motif_seq_0389	TATABOXOSPAL	789	+	TATTTat	(Motif sequence only)
Vc9p318.12	UGT73C6(Vc9p318.12)	TF_motif_seq_0389	TATABOXOSPAL	802	-	taAAATA	(Motif sequence only)
Vc9p318.12	UGT73C6(Vc9p318.12)	TF_motif_seq_0389	TATABOXOSPAL	863	-	tgAAATA	(Motif sequence only)
Vc9p318.12	UGT73C6(Vc9p318.12)	TF_motif_seq_0389	TATABOXOSPAL	1010	+	TATTTaa	(Motif sequence only)
Vc9p318.12	UGT73C6(Vc9p318.12)	TF_motif_seq_0389	TATABOXOSPAL	1067	+	TATTTaa	(Motif sequence only)
Vc9p318.12	UGT73C6(Vc9p318.12)	TF_motif_seq_0389	TATABOXOSPAL	1341	-	taAAATA	(Motif sequence only)
Vc9p318.12	UGT73C6(Vc9p318.12)	TF_motif_seq_0389	TATABOXOSPAL	1364	-	ttAAATA	(Motif sequence only)
Vc9p318.12	UGT73C6(Vc9p318.12)	TF_motif_seq_0389	TATABOXOSPAL	1500	-	taAAATA	(Motif sequence only)
Vc9p318.12	UGT73C6(Vc9p318.12)	TF_motif_seq_0389	TATABOXOSPAL	1587	+	TATTTat	(Motif sequence only)
Vc9p318.12	UGT73C6(Vc9p318.12)	TF_motif_seq_0390	ANAERO3CONSENSUS	1305	-	ttGATGA	(Motif sequence only)
Vc9p318.12	UGT73C6(Vc9p318.12)	TF_motif_seq_0392	PROLAMINBOXOSGLUB1	32	+	TGCAAag	(Motif sequence only)
Vc9p318.12	UGT73C6(Vc9p318.12)	TF_motif_seq_0392	PROLAMINBOXOSGLUB1	457	-	caTTGCA	(Motif sequence only)
Vc9p318.12	UGT73C6(Vc9p318.12)	TF_motif_seq_0392	PROLAMINBOXOSGLUB1	460	+	TGCAAtg	(Motif sequence only)
Vc9p318.12	UGT73C6(Vc9p318.12)	TF_motif_seq_0392	PROLAMINBOXOSGLUB1	476	-	ctTTGCA	(Motif sequence only)
Vc9p318.12	UGT73C6(Vc9p318.12)	TF_motif_seq_0392	PROLAMINBOXOSGLUB1	479	+	TGCAAtg	(Motif sequence only)
Vc9p318.12	UGT73C6(Vc9p318.12)	TF_motif_seq_0392	PROLAMINBOXOSGLUB1	824	+	TGCAAac	(Motif sequence only)
Vc9p318.12	UGT73C6(Vc9p318.12)	TF_motif_seq_0397	WUSATAg	1013	+	TTAATtg	(Motif sequence only)
Vc9p318.12	UGT73C6(Vc9p318.12)	TF_motif_seq_0397	WUSATAg	1210	+	TTAATag	(Motif sequence only)
Vc9p318.12	UGT73C6(Vc9p318.12)	TF_motif_seq_0399	WBBOXPCWRKY1	79	+	TTTGAat	(Motif sequence only)
Vc9p318.12	UGT73C6(Vc9p318.12)	TF_motif_seq_0399	WBBOXPCWRKY1	198	+	TTTGAtt	(Motif sequence only)
Vc9p318.12	UGT73C6(Vc9p318.12)	TF_motif_seq_0399	WBBOXPCWRKY1	394	+	TTTGAat	(Motif sequence only)
Vc9p318.12	UGT73C6(Vc9p318.12)	TF_motif_seq_0399	WBBOXPCWRKY1	1095	+	TTTGAat	(Motif sequence only)
Vc9p318.12	UGT73C6(Vc9p318.12)	TF_motif_seq_0399	WBBOXPCWRKY1	1856	-	aaTCAAA	(Motif sequence only)
Vc9p318.12	UGT73C6(Vc9p318.12)	TF_motif_seq_0399	WBBOXPCWRKY1	1892	-	acTCAAA	(Motif sequence only)
Vc9p318.12	UGT73C6(Vc9p318.12)	TF_motif_seq_0403	CCA1ATLHCB1	1025	+	aaaAATCT	(Motif sequence only)
Vc9p318.12	UGT73C6(Vc9p318.12)	TF_motif_seq_0403	CCA1ATLHCB1	1797	+	gaaAATCT	(Motif sequence only)
Vc9p318.12	UGT73C6(Vc9p318.12)	TF_motif_seq_0404	XYLAT	839	-	ttaTTTGT	(Motif sequence only)
Vc9p318.12	UGT73C6(Vc9p318.12)	TF_motif_seq_0404	XYLAT	1113	-	ttcTTTGT	(Motif sequence only)
Vc9p318.12	UGT73C6(Vc9p318.12)	TF_motif_seq_0404	XYLAT	1821	+	ACAAAaaa	(Motif sequence only)
Vc9p318.12	UGT73C6(Vc9p318.12)	TF_motif_seq_0415	CDA1ATCAB2	1785	+	CAAAAcgc	(Motif sequence only)
Vc9p318.12	UGT73C6(Vc9p318.12)	TF_motif_seq_0416	PROXBBNNAPA	214	-	ggaGTTTG	(Motif sequence only)
Vc9p318.12	UGT73C6(Vc9p318.12)	TF_motif_seq_0416	PROXBBNNAPA	1593	-	tgtGTTTG	(Motif sequence only)
Vc9p318.12	UGT73C6(Vc9p318.12)	TF_motif_seq_0416	PROXBBNNAPA	1912	+	CAAACacc	(Motif sequence only)
Vc9p318.12	UGT73C6(Vc9p318.12)	TF_motif_seq_0425	SITEIOSPCNA	644	-	ctaTCTGG	(Motif sequence only)
Vc9p318.12	UGT73C6(Vc9p318.12)	TF_motif_seq_0425	SITEIOSPCNA	1082	-	ctaCCTTG	(Motif sequence only)
Vc9p318.12	UGT73C6(Vc9p318.12)	TF_motif_seq_0425	SITEIOSPCNA	1655	-	ctaCCTAG	(Motif sequence only)
Vc9p318.12	UGT73C6(Vc9p318.12)	TF_motif_seq_0425	SITEIOSPCNA	1682	-	cctCCTGA	(Motif sequence only)
Vc9p318.12	UGT73C6(Vc9p318.12)	TF_motif_seq_0425	SITEIOSPCNA	1933	-	ccgCCCGG	(Motif sequence only)
Vc9p318.12	UGT73C6(Vc9p318.12)	TF_motif_seq_0425	SITEIOSPCNA	1936	+	CCCGGtga	(Motif sequence only)
Vc9p318.12	UGT73C6(Vc9p318.12)	TF_motif_seq_0429	E2F1OSPCNA	444	-	attCACGC	(Motif sequence only)
Vc9p318.12	UGT73C6(Vc9p318.12)	TF_motif_seq_0429	E2F1OSPCNA	503	+	GCGTGgaa	(Motif sequence only)
Vc9p318.12	UGT73C6(Vc9p318.12)	TF_motif_seq_0429	E2F1OSPCNA	677	+	GCGGAaaa	(Motif sequence only)
Vc9p318.12	UGT73C6(Vc9p318.12)	TF_motif_seq_0429	E2F1OSPCNA	1904	+	TCGGGaaa	(Motif sequence only)
Vc9p318.12	UGT73C6(Vc9p318.12)	TF_motif_seq_0432	GGTCCCATGMSAUR	110	-	ttgGGACC	(Motif sequence only)
Vc9p318.12	UGT73C6(Vc9p318.12)	TF_motif_seq_0432	GGTCCCATGMSAUR	139	-	gggGGACC	(Motif sequence only)
Vc9p318.12	UGT73C6(Vc9p318.12)	TF_motif_seq_0432	GGTCCCATGMSAUR	142	+	GGACCcac	(Motif sequence only)
Vc9p318.12	UGT73C6(Vc9p318.12)	TF_motif_seq_0432	GGTCCCATGMSAUR	152	-	ttgGGTCC	(Motif sequence only)
Vc9p318.12	UGT73C6(Vc9p318.12)	TF_motif_seq_0432	GGTCCCATGMSAUR	155	+	GGTCCcac	(Motif sequence only)
Vc9p318.12	UGT73C6(Vc9p318.12)	TF_motif_seq_0432	GGTCCCATGMSAUR	239	+	GGTCCaat	(Motif sequence only)
Vc9p318.12	UGT73C6(Vc9p318.12)	TF_motif_seq_0432	GGTCCCATGMSAUR	315	-	gtgAGACC	(Motif sequence only)
Vc9p318.12	UGT73C6(Vc9p318.12)	TF_motif_seq_0432	GGTCCCATGMSAUR	328	-	gtgGGTCC	(Motif sequence only)
Vc9p318.12	UGT73C6(Vc9p318.12)	TF_motif_seq_0432	GGTCCCATGMSAUR	331	+	GGTCCccc	(Motif sequence only)
Vc9p318.12	UGT73C6(Vc9p318.12)	TF_motif_seq_0432	GGTCCCATGMSAUR	360	+	GGTCCcaa	(Motif sequence only)
Vc9p318.12	UGT73C6(Vc9p318.12)	TF_motif_seq_0432	GGTCCCATGMSAUR	387	+	GGTCCctt	(Motif sequence only)
Vc9p318.12	UGT73C6(Vc9p318.12)	TF_motif_seq_0432	GGTCCCATGMSAUR	401	+	GGTCAcaa	(Motif sequence only)
Vc9p318.12	UGT73C6(Vc9p318.12)	TF_motif_seq_0432	GGTCCCATGMSAUR	559	+	GGTCCtgt	(Motif sequence only)
Vc9p318.12	UGT73C6(Vc9p318.12)	TF_motif_seq_0432	GGTCCCATGMSAUR	830	+	CGTCCtat	(Motif sequence only)
Vc9p318.12	UGT73C6(Vc9p318.12)	TF_motif_seq_0432	GGTCCCATGMSAUR	996	-	ctgGGATC	(Motif sequence only)
Vc9p318.12	UGT73C6(Vc9p318.12)	TF_motif_seq_0432	GGTCCCATGMSAUR	1702	-	ataGTACC	(Motif sequence only)
Vc9p318.12	UGT73C6(Vc9p318.12)	TF_motif_seq_0432	GGTCCCATGMSAUR	1768	-	attGCACC	(Motif sequence only)
Vc9p318.12	UGT73C6(Vc9p318.12)	TF_motif_seq_0434	P1BS	121	-	aaaTATAC	(Motif sequence only)
Vc9p318.12	UGT73C6(Vc9p318.12)	TF_motif_seq_0434	P1BS	699	+	GAATAtta	(Motif sequence only)
Vc9p318.12	UGT73C6(Vc9p318.12)	TF_motif_seq_0434	P1BS	819	-	taaTATGC	(Motif sequence only)
Vc9p318.12	UGT73C6(Vc9p318.12)	TF_motif_seq_0434	P1BS	854	-	caaTATTC	(Motif sequence only)
Vc9p318.12	UGT73C6(Vc9p318.12)	TF_motif_seq_0434	P1BS	918	+	GCATAaac	(Motif sequence only)
Vc9p318.12	UGT73C6(Vc9p318.12)	TF_motif_seq_0434	P1BS	1343	-	aaaTATCC	(Motif sequence only)
Vc9p318.12	UGT73C6(Vc9p318.12)	TF_motif_seq_0435	PIATGAPB	1830	-	ataATCAC	(Motif sequence only)
Vc9p318.12	UGT73C6(Vc9p318.12)	TF_motif_seq_0437	SV40COREENHAN	38	+	GTGGAtag	(Motif sequence only)
Vc9p318.12	UGT73C6(Vc9p318.12)	TF_motif_seq_0437	SV40COREENHAN	505	+	GTGGAaag	(Motif sequence only)
Vc9p318.12	UGT73C6(Vc9p318.12)	TF_motif_seq_0437	SV40COREENHAN	1746	+	GTGGAtcg	(Motif sequence only)
Vc9p318.12	UGT73C6(Vc9p318.12)	TF_motif_seq_0440	MYBPLANT	217	-	gtTTGGTt	(Motif sequence only)
Vc9p318.12	UGT73C6(Vc9p318.12)	TF_motif_seq_0445	L1BOXATPDF1	622	-	tagATTTA	(Motif sequence only)
Vc9p318.12	UGT73C6(Vc9p318.12)	TF_motif_seq_0445	L1BOXATPDF1	1290	+	TAAATgct	(Motif sequence only)
Vc9p318.12	UGT73C6(Vc9p318.12)	TF_motif_seq_0445	L1BOXATPDF1	1585	-	tgtATTTA	(Motif sequence only)
Vc9p318.12	UGT73C6(Vc9p318.12)	TF_motif_seq_0449	AUXRETGA1GMGH3	425	+	CGACGtca	(Motif sequence only)
Vc9p318.12	UGT73C6(Vc9p318.12)	TF_motif_seq_0449	AUXRETGA1GMGH3	425	-	cgaCGTCA	(Motif sequence only)
Vc9p318.12	UGT73C6(Vc9p318.12)	TF_motif_seq_0449	AUXRETGA1GMGH3	1407	+	TGACTtaa	(Motif sequence only)
Vc9p318.12	UGT73C6(Vc9p318.12)	TF_motif_seq_0449	AUXRETGA1GMGH3	1754	-	gtaCGTAA	(Motif sequence only)
Vc9p318.12	UGT73C6(Vc9p318.12)	TF_motif_seq_0449	AUXRETGA1GMGH3	1814	+	TGACGcaa	(Motif sequence only)
Vc9p318.12	UGT73C6(Vc9p318.12)	TF_motif_seq_0449	AUXRETGA1GMGH3	1983	-	tcaAGTCA	(Motif sequence only)
Vc9p318.12	UGT73C6(Vc9p318.12)	TF_motif_seq_0450	PALINDROMICCBOXGM	425	+	CGACGtca	(Motif sequence only)
Vc9p318.12	UGT73C6(Vc9p318.12)	TF_motif_seq_0450	PALINDROMICCBOXGM	425	-	cgaCGTCA	(Motif sequence only)
Vc9p318.12	UGT73C6(Vc9p318.12)	TF_motif_seq_0450	PALINDROMICCBOXGM	1391	+	TGACAaca	(Motif sequence only)
Vc9p318.12	UGT73C6(Vc9p318.12)	TF_motif_seq_0450	PALINDROMICCBOXGM	1407	+	TGACTtaa	(Motif sequence only)
Vc9p318.12	UGT73C6(Vc9p318.12)	TF_motif_seq_0450	PALINDROMICCBOXGM	1649	+	TGACTtct	(Motif sequence only)
Vc9p318.12	UGT73C6(Vc9p318.12)	TF_motif_seq_0450	PALINDROMICCBOXGM	1814	+	TGACGcaa	(Motif sequence only)
Vc9p318.12	UGT73C6(Vc9p318.12)	TF_motif_seq_0450	PALINDROMICCBOXGM	1983	-	tcaAGTCA	(Motif sequence only)
Vc9p318.12	UGT73C6(Vc9p318.12)	TF_motif_seq_0454	TATAPVTRNALEU	757	+	TTTATaaa	(Motif sequence only)
Vc9p318.12	UGT73C6(Vc9p318.12)	TF_motif_seq_0454	TATAPVTRNALEU	757	-	tttATAAA	(Motif sequence only)
Vc9p318.12	UGT73C6(Vc9p318.12)	TF_motif_seq_0455	E2FANTRNR	23	-	gttGGAAA	(Motif sequence only)
Vc9p318.12	UGT73C6(Vc9p318.12)	TF_motif_seq_0455	E2FANTRNR	586	+	TTTCCatc	(Motif sequence only)
[truncated: 539,071+ more rows]

## Sheet: Table S8_DEFs_All
ID	ID	name	ID	Ex_1	Ex_2	Ex_3	Sa_1	Sa_2	Sa_3	Se_1	Se_2	Se_3
Vc4a330.20	MYB(Vc4a330.20)	MYB	Vc4a330.20	16.6291	20.0772	16.9645	0	0	0	0	0	0
Vc4a358.29	MYB(Vc4a358.29)	MYB	Vc4a358.29	49.7854	55.0831	55.6784	0.0612856	0.0748741	0.0725617	55.1045	66.1573	66.3678
Vc6a184.14	MYB(Vc6a184.14)	MYB	Vc6a184.14	2.17339	2.49433	2.87618	0.627835	0.495381	0.743351	19.8325	22.2896	21.9849
Vc6a4.41	MYB(Vc6a4.41)	MYB	Vc6a4.41	2.00602	2.39245	2.09406	0	0.0121683	0.0707548	0	0	0.0185803
Vc6s261.32	MYB(Vc6s261.32)	MYB	Vc6s261.32	6.45819	7.50238	7.64465	0.0153912	0.0156699	0	0	0.016878	0
Vc7p286.13	MYB(Vc7p286.13)	MYB	Vc7p286.13	1.56546	0.932864	0.940429	1.06837	0.647447	0.903529	6.98557	6.7226	5.77352
Vc9a205.32	MYB(Vc9a205.32)	MYB	Vc9a205.32	0.980346	1.26472	1.13864	0.835128	0.66046	0.838701	8.43234	8.67557	6.42185
Vc9a334.16	MYB(Vc9a334.16)	MYB	Vc9a334.16	10.4289	10.4967	10.0984	0	0.011066	0	10.5142	12.2291	11.1184
Vc13a102.20	MYB(Vc13a102.20)	MYB	Vc13a102.20	64.9638	62.0564	69.1117	18.0552	20.2322	19.8869	0.0257207	0	0.0518345
Vc13s257.23	MYB(Vc13s257.23)	MYB	Vc13s257.23	0.749724	0.987082	0.5965	0	0	0.0203413	25.7424	31.5606	29.7423
Vc15a315.33	MYB(Vc15a315.33)	MYB	Vc15a315.33	7.29335	8.3608	7.78769	7.54451	8.39276	11.2253	1.4875	1.33042	1.38645
Vc15a332.31	MYB(Vc15a332.31)	MYB	Vc15a332.31	1.19205	1.6338	1.30768	1.6658	1.75906	2.61444	0.286883	0.416321	0.529972
Vc15a360.46	MYB(Vc15a360.46)	MYB	Vc15a360.46	2.33336	3.08842	2.93942	0	0	0.0712215	0.668196	0.897117	0.473805
Vc15s21.24	MYB(Vc15s21.24)	MYB	Vc15s21.24	6.06237	6.88471	6.95261	5.86627	4.8899	4.50771	0.695121	1.10674	0.672415
Vc16a61.39	MYB(Vc16a61.39)	MYB	Vc16a61.39	1.23547	1.50183	1.19987	0.261262	0.0506652	0.0552379	2.01538	2.42843	1.93407
Vc17a20.19	MYB(Vc17a20.19)	MYB	Vc17a20.19	6.90033	7.27171	6.45638	2.67412	2.30026	1.9223	17.9002	15.6915	10.7916
Vc19a360.19	MYB(Vc19a360.19)	MYB	Vc19a360.19	3.2226	2.99101	3.03165	2.66086	2.55334	2.59518	0.283115	0.33539	0.158488
Vc20a132.28	MYB(Vc20a132.28)	MYB	Vc20a132.28	1.09016	0.952797	0.839414	1.94857	1.76165	1.18815	0	0	0
Vc21a309.26	MYB(Vc21a309.26)	MYB	Vc21a309.26	2.32266	2.19342	2.53356	0	0.0143278	0.0208279	0.151983	0.385811	0.328165
Vc21s131.29	MYB(Vc21s131.29)	MYB	Vc21s131.29	0.345896	0.220435	0.397517	0.113347	0.0524542	0.122002	2.16205	2.37293	1.8582
Vc22a252.29	MYB(Vc22a252.29)	MYB	Vc22a252.29	0	0.024839	0.0261291	0.0162554	0	0	2.58312	2.85211	2.57759
Vc23p326.0	MYB(Vc23p326.0)	MYB	Vc23p326.0	0.0723684	0.474372	0.124753	0	0	0.0382879	5.26848	4.93627	6.47505
Vc24a73.38	MYB(Vc24a73.38)	MYB	Vc24a73.38	2.70738	3.11574	2.2505	3.2042	2.75518	4.74219	0.333429	0.309126	0.62813
Vc28a197.19	MYB(Vc28a197.19)	MYB	Vc28a197.19	30.5089	32.5276	31.8937	0.906674	1.05687	1.30297	0.0405454	0.0144095	0
Vc28a311.40	MYB(Vc28a311.40)	MYB	Vc28a311.40	0	0	0	0.00564662	0	0	1.81201	1.60375	1.3255
Vc30a146.39	MYB(Vc30a146.39)	MYB	Vc30a146.39	0.410346	1.02735	0.334039	0	0	0.0542753	23.5556	24.7592	24.6858
Vc32a121.31	MYB(Vc32a121.31)	MYB	Vc32a121.31	0.782511	0.83589	0.999211	0	0	0.0184001	18.3946	21.0093	20.2746
Vc32a298.24	MYB(Vc32a298.24)	MYB	Vc32a298.24	5.28776	4.1765	5.57048	2.73323	3.21616	7.51064	1.6158	1.54065	1.98554
Vc33p215.5	MYB(Vc33p215.5)	MYB	Vc33p215.5	2.42285	1.95976	2.14187	4.59713	3.06936	4.16603	0.0256972	0.0182652	0
Vc34a253.30	MYB(Vc34a253.30)	MYB	Vc34a253.30	1.85432	1.8365	1.65306	0.520395	0.529816	0.751841	10.4946	10.7611	9.13013
Vc34p141.22	MYB(Vc34p141.22)	MYB	Vc34p141.22	8.00135	7.22538	6.68451	10.7236	9.24141	11.1533	1.62838	1.713	1.60801
Vc35a146.23	MYB(Vc35a146.23)	MYB	Vc35a146.23	1.68545	1.59214	1.64571	1.22315	1.12538	1.22025	11.7139	11.6446	12.0428
Vc36a113.22	MYB(Vc36a113.22)	MYB	Vc36a113.22	6.06127	5.31837	7.10296	0	0	0	0	0	0
Vc36a211.31	MYB(Vc36a211.31)	MYB	Vc36a211.31	0.66466	1.30909	0.763852	0.696078	0.654166	0.911321	8.48801	12.815	9.47891
Vc36a83.18	MYB(Vc36a83.18)	MYB	Vc36a83.18	27.9234	29.0917	26.5615	0	0	0.0676515	31.4002	38.4469	32.6527
Vc37a23.28	MYB(Vc37a23.28)	MYB	Vc37a23.28	0.350796	0.091978	0.0806294	0.140451	0.204277	0.178171	3.99325	4.08149	4.72558
Vc37a96.16	MYB(Vc37a96.16)	MYB	Vc37a96.16	0.976029	0.557387	0.509858	0.126877	0.209908	0.140833	4.47769	4.5914	3.69828
Vc37s143.27	MYB(Vc37s143.27)	MYB	Vc37s143.27	13.0988	5.97688	7.36514	0	0	0	0	0	0
Vc38s163.31	MYB(Vc38s163.31)	MYB	Vc38s163.31	21.2237	22.576	21.6069	0	0.0150721	0	0	0.0162341	0
Vc39a189.28	MYB(Vc39a189.28)	MYB	Vc39a189.28	12.4105	10.7332	10.6657	6.73904	6.93141	6.62356	0.359895	0.284232	0.255195
Vc40a267.47	MYB(Vc40a267.47)	MYB	Vc40a267.47	0.418194	0.659929	0.427204	1.01326	0.591901	0.516258	8.84133	9.76341	11.801
Vc42a127.23	MYB(Vc42a127.23)	MYB	Vc42a127.23	4.32708	4.07458	3.07941	8.67272	10.4507	9.00403	1.91717	3.32157	2.61601
Vc42p218.13	MYB(Vc42p218.13)	MYB	Vc42p218.13	3.36722	3.28285	3.25743	0.335212	0.232692	0.541212	0.517165	0.384302	0.592178
Vc43a40.46	MYB(Vc43a40.46)	MYB	Vc43a40.46	7.60982	7.8088	7.93113	0.0440546	0.269113	0.0978005	0.509755	0.0724653	0.10273
Vc43p202.0	MYB(Vc43p202.0)	MYB	Vc43p202.0	17.5261	19.3263	19.7959	29.8503	28.8383	25.2571	11.2494	10.0538	9.08649
Vc44s239.19	MYB(Vc44s239.19)	MYB	Vc44s239.19	15.7678	15.2059	16.7836	12.46	11.484	11.9979	1.62184	1.83172	1.70442
Vc45a25.28	MYB(Vc45a25.28)	MYB	Vc45a25.28	0.341997	0.32268	0.535957	0.0222286	0.113155	0.263185	1.88619	1.74288	1.96971
Vc46a84.23	MYB(Vc46a84.23)	MYB	Vc46a84.23	0.975313	0.757705	0.697427	8.1663	4.938	6.07742	0.119535	0.18692	0.144538
Vc46p168.9	MYB(Vc46p168.9)	MYB	Vc46p168.9	4.05438	3.74159	3.87804	0.0540136	0.036661	0.133233	0.11111	0.0394875	0.167938
Vc46p48.6	MYB(Vc46p48.6)	MYB	Vc46p48.6	6.50569	6.31115	6.23565	14.726	7.74191	8.22642	2.67986	2.87837	5.28065
Vc239a0.53	MYB(Vc239a0.53)	MYB	Vc239a0.53	0.629121	0.709482	0.862946	0	0.0147723	0	4.11892	4.48697	2.61655
Novel2432	BHLH(Novel2432)	BHLH	Novel2432	2.54375	2.59464	2.53544	3.34432	3.12405	4.00557	1.05054	0.765612	1.42035
Vc11a352.34	BHLH(Vc11a352.34)	BHLH	Vc11a352.34	13.638	16.612	14.8206	8.65231	7.03651	8.07245	1.75217	2.48264	2.29987
Vc11p379.7	BHLH(Vc11p379.7)	BHLH	Vc11p379.7	78.6649	70.4037	74.3702	24.3379	22.0094	20.3462	0.217241	0.113777	0.218901
Vc13p48.41	BHLH(Vc13p48.41)	BHLH	Vc13p48.41	0.267264	0.140958	0.180053	0.685265	0.543378	0.672873	4.12725	4.37148	4.7529
Vc153a0.21	BHLH(Vc153a0.21)	BHLH	Vc153a0.21	19.6645	18.9892	17.4152	24.9805	26.9099	27.6465	0.851575	0.760933	0.674208
Vc15a341.41	BHLH(Vc15a341.41)	BHLH	Vc15a341.41	1.9324	2.86337	1.7996	0.277906	0.113175	0.199774	0.857507	1.0884	1.43187
Vc15a371.25	BHLH(Vc15a371.25)	BHLH	Vc15a371.25	41.8132	39.1166	31.9935	14.6307	13.7162	12.9563	0.0558488	0.0198483	0.00937926
Vc19a381.30	BHLH(Vc19a381.30)	BHLH	Vc19a381.30	57.7283	54.2066	62.0459	14.1601	17.0251	14.2063	0.133675	0.0339335	0.00962114
Vc19s108.28	BHLH(Vc19s108.28)	BHLH	Vc19s108.28	0.582212	0.50885	0.545574	0.153696	0.241238	0.701361	2.96403	3.00568	2.64818
Vc22a324.29	BHLH(Vc22a324.29)	BHLH	Vc22a324.29	0.352535	0.20327	0.30386	0.00700138	0.00712813	0	2.58161	2.2726	2.68841
Vc22a342.30	BHLH(Vc22a342.30)	BHLH	Vc22a342.30	0.668016	0.471331	0.44783	0.368155	0.354559	0.250344	2.1952	2.95696	2.90805
Vc22a46.34	BHLH(Vc22a46.34)	BHLH	Vc22a46.34	5.64412	4.67827	4.27412	0.627303	0.953223	0.914545	53.2147	41.8797	42.5157
Vc22s21.29	BHLH(Vc22s21.29)	BHLH	Vc22s21.29	0.0197904	0.0540522	0.0113719	0.0141494	0.0216084	0.0314115	1.49533	1.08614	1.37478
Vc24a24.28	BHLH(Vc24a24.28)	BHLH	Vc24a24.28	131.344	111.291	119.788	35.8598	34.7555	27.4979	0.213075	0.0979976	0.0631481
Vc24s42.44	BHLH(Vc24s42.44)	BHLH	Vc24s42.44	0.0735578	0.0160723	0.0169071	0.399692	0.63181	0.778343	42.013	48.2132	56.2165
Vc27a279.25	BHLH(Vc27a279.25)	BHLH	Vc27a279.25	1.04199	1.78298	1.00993	0.0718055	0.20104	0.0664196	2.32641	2.441	2.74884
Vc27s117.30	BHLH(Vc27s117.30)	BHLH	Vc27s117.30	3.72648	2.94772	2.26598	3.75699	3.30997	3.444	56.8909	64.6981	61.7716
Vc27s278.27	BHLH(Vc27s278.27)	BHLH	Vc27s278.27	48.2016	53.5051	47.3938	91.272	97.2146	82.4405	0.0203166	0.375459	0.388965
Vc28s249.31	BHLH(Vc28s249.31)	BHLH	Vc28s249.31	1.31722	1.3292	0.439117	0.783605	0.585535	0.478787	3.9263	4.00481	6.28091
Vc30a304.40	BHLH(Vc30a304.40)	BHLH	Vc30a304.40	1.64811	1.59179	5.07829	6.04538	3.70332	5.43397	16.0716	20.0753	30.3977
Vc32a316.27	BHLH(Vc32a316.27)	BHLH	Vc32a316.27	1.21069	1.00598	0.744679	11.2772	7.05018	8.40823	26.0695	28.0487	30.1919
Vc33a215.24	BHLH(Vc33a215.24)	BHLH	Vc33a215.24	0.182539	0.28667	0.367116	0.195763	0.39031	0.277655	1.43461	2.00362	1.80062
Vc34a66.24	BHLH(Vc34a66.24)	BHLH	Vc34a66.24	106.814	118.189	125.441	195.194	198.423	170.808	2.67021	3.10216	2.6535
Vc34s193.28	BHLH(Vc34s193.28)	BHLH	Vc34s193.28	1.40119	0.326418	0.840669	0.464068	0.61496	0.566895	6.8187	10.6949	8.86333
Vc40a47.23	BHLH(Vc40a47.23)	BHLH	Vc40a47.23	0.32588	1.48105	0.719064	0.0372787	0.047442	0.124137	1.78292	1.47167	2.20221
Vc41s44.35	BHLH(Vc41s44.35)	BHLH	Vc41s44.35	1.12111	1.38543	0.63365	1.45856	2.11374	1.76971	11.2716	12.6804	12.1544
Vc43a52.26	BHLH(Vc43a52.26)	BHLH	Vc43a52.26	0.239702	0.402881	0.296665	0.0197744	0.0201324	0.00975531	1.96268	2.75394	2.61299
Vc43p33.1	BHLH(Vc43p33.1)	BHLH	Vc43p33.1	15.4335	13.0986	14.4467	15.8169	16.4334	14.7861	6.12794	5.06677	6.11175
Vc46a177.36	BHLH(Vc46a177.36)	BHLH	Vc46a177.36	0.0433104	0.110405	0.0995479	0.0412871	0.0630519	0.0611046	3.47153	4.66337	4.79779
Vc47a149.29	BHLH(Vc47a149.29)	BHLH	Vc47a149.29	0.762911	0.677199	0.50414	0.0477272	0.0138832	0.0100908	3.9762	3.67111	4.08078
Vc47a151.19	BHLH(Vc47a151.19)	BHLH	Vc47a151.19	0.31529	0.229635	0.296463	0.0614784	0.0278184	0.0404389	2.38176	3.10868	2.94154
Vc47a169.33	BHLH(Vc47a169.33)	BHLH	Vc47a169.33	0.708214	0.974885	0.895295	0.253173	0.319618	0.329731	5.32772	5.69696	4.99059
Vc50a11.22	BHLH(Vc50a11.22)	BHLH	Vc50a11.22	34.4766	34.7129	39.1729	53.4314	54.9559	65.0112	2.15389	1.67793	1.31957
Vc6a50.33	BHLH(Vc6a50.33)	BHLH	Vc6a50.33	47.1294	53.6136	45.8265	39.5483	40.6035	43.1158	14.8403	16.2831	15.1114
Novel0710	WD40(Novel0710)	WD40	Novel0710	6.21452	6.68996	6.51486	2.18906	2.82449	4.90781	2.29054	1.73503	1.73524
Vc18a206.17	WD40(Vc18a206.17)	WD40	Vc18a206.17	0.880117	0.754424	0.684682	0.24202	0.256257	0.257894	5.55601	5.89184	6.72718
Vc22a321.44	WD40(Vc22a321.44)	WD40	Vc22a321.44	2.60644	2.81723	2.93169	4.78763	3.25963	5.11986	0.412902	0.369573	0.369828
Vc35a238.21	WD40(Vc35a238.21)	WD40	Vc35a238.21	11.9098	11.944	13.2156	19.4331	17.9927	16.3446	4.59096	5.12458	5.29931
Vc35a302.34	WD40(Vc35a302.34)	WD40	Vc35a302.34	7.17768	9.57235	10.4783	6.40316	3.43605	7.01337	0.962914	2.48421	2.37178
Vc38s123.42	WD40(Vc38s123.42)	WD40	Vc38s123.42	0.309586	0.115961	0.132149	0.0505925	0.109455	0.159112	1.60986	1.85163	1.98592
Vc3p303.25	WD40(Vc3p303.25)	WD40	Vc3p303.25	2.13685	2.43779	2.45575	1.01401	0.812126	0.840403	0.0834351	0.133435	0.0840726
Vc43a54.43	WD40(Vc43a54.43)	WD40	Vc43a54.43	3.51983	3.65117	3.3505	2.50383	3.93374	5.85004	0.470609	0.40419	0.632273
Vc45a174.26	WD40(Vc45a174.26)	WD40	Vc45a174.26	19.1853	20.0567	18.9775	27.516	22.4868	28.1931	1.20866	1.65791	1.32473
Vc4a330.17	WD40(Vc4a330.17)	WD40	Vc4a330.17	35.0851	31.2086	35.5099	57.5225	56.2863	48.9889	12.4794	14.5148	12.7357
Vc4s425.50	WD40(Vc4s425.50)	WD40	Vc4s425.50	3.74125	5.55493	4.00077	3.625	1.39844	2.17044	0.780739	0.611564	1.10781
Vc4s425.50	WD40(Vc4s425.50)	WD40	Vc4s425.50	3.74125	5.55493	4.00077	3.625	1.39844	2.17044	0.780739	0.611564	1.10781
Vc60a5.33	WD40(Vc60a5.33)	WD40	Vc60a5.33	0.196056	0.980328	0.805932	1.53111	0.740995	0.86971	6.7539	3.94924	1.869
Vc9p390.25	WD40(Vc9p390.25)	WD40	Vc9p390.25	11.3254	13.32	13.2488	12.225	8.90174	9.52462	1.44456	1.09908	1.04557
Vc10a390.33	WRKY(Vc10a390.33)	WRKY	Vc10a390.33	3.30555	3.81927	3.08284	0.358833	0.226756	0.384567	3.5889	2.55094	3.53938
Vc10p234.4	WRKY(Vc10p234.4)	WRKY	Vc10p234.4	4.9767	5.25038	4.92104	4.2421	3.79665	3.66333	0.150742	0.178575	0.253156
Vc10p234.4	WRKY(Vc10p234.4)	WRKY	Vc10p234.4	4.9767	5.25038	4.92104	4.2421	3.79665	3.66333	0.150742	0.178575	0.253156
Vc11a207.26	WRKY(Vc11a207.26)	WRKY	Vc11a207.26	12.0778	12.2928	13.2223	0.118075	0.168297	0.407748	1.29945	0.733723	0.758704
Vc11a395.29	WRKY(Vc11a395.29)	WRKY	Vc11a395.29	5.22359	4.46318	4.12156	0.769232	0.533455	0.775469	0.894377	0.391206	1.07452
Vc12s296.36	WRKY(Vc12s296.36)	WRKY	Vc12s296.36	0.0941323	0.329084	0.237997	0	0.0411117	0.0996049	4.69321	3.15874	4.41519
Vc15a200.28	WRKY(Vc15a200.28)	WRKY	Vc15a200.28	7.0234	6.81162	6.17564	0.0520359	0.079467	0.179696	0.535207	0.608667	0.444919
Vc15s305.29	WRKY(Vc15s305.29)	WRKY	Vc15s305.29	5.75433	6.81325	6.11799	0.667355	0.627172	1.25902	6.93562	7.41471	5.38112
Vc15s305.29	WRKY(Vc15s305.29)	WRKY	Vc15s305.29	5.75433	6.81325	6.11799	0.667355	0.627172	1.25902	6.93562	7.41471	5.38112
Vc15s386.36	WRKY(Vc15s386.36)	WRKY	Vc15s386.36	3.86369	2.7333	2.80248	1.0642	1.01431	1.2399	0.139732	0.0993193	0.228799
Vc1617s0.4	WRKY(Vc1617s0.4)	WRKY	Vc1617s0.4	1.50058	0.639355	0.517356	0.0858287	0.0546141	0.158782	15.0293	14.0944	16.6619
Vc17p334.22	WRKY(Vc17p334.22)	WRKY	Vc17p334.22	1.41721	1.15697	1.03808	0.0111347	0	0.0164792	4.31182	3.50435	4.43132
Vc19a273.26	WRKY(Vc19a273.26)	WRKY	Vc19a273.26	5.14292	4.987	4.84462	0.111946	0.18411	0.178424	0.890122	0.679901	0.535477
Vc19a368.29	WRKY(Vc19a368.29)	WRKY	Vc19a368.29	7.93458	7.34075	7.41315	0.309129	0.263689	1.16232	8.91976	8.66716	7.2215
Vc19a368.29	WRKY(Vc19a368.29)	WRKY	Vc19a368.29	7.93458	7.34075	7.41315	0.309129	0.263689	1.16232	8.91976	8.66716	7.2215
Vc22a10.31	WRKY(Vc22a10.31)	WRKY	Vc22a10.31	5.00767	3.85446	5.2505	0.302233	0.189357	0.326874	26.7217	23.7609	23.0587
Vc22a15.21	WRKY(Vc22a15.21)	WRKY	Vc22a15.21	0.596538	0.651713	1.47937	0.08979	0.0571347	0.182721	17.0909	14.9419	13.5748
Vc22p340.16	WRKY(Vc22p340.16)	WRKY	Vc22p340.16	1.84489	1.48417	2.35152	2.39824	2.45386	1.86342	1.036	0.802121	0.447392
Vc23a96.33	WRKY(Vc23a96.33)	WRKY	Vc23a96.33	0.203266	0.240572	0.0778668	0.0484425	0.0123299	0.0358472	3.25106	2.178	2.80523
Vc24a191.23	WRKY(Vc24a191.23)	WRKY	Vc24a191.23	30.2983	29.9008	27.1799	0.564797	0.309627	0.925913	4.45068	2.21062	2.29638
Vc24a3.26	WRKY(Vc24a3.26)	WRKY	Vc24a3.26	9.12304	9.98407	10.2129	1.32931	1.22721	1.66726	1.44255	1.32183	1.38352
Vc24s64.33	WRKY(Vc24s64.33)	WRKY	Vc24s64.33	3.72762	3.88648	3.82758	0.150636	0.407003	0.788866	5.06815	4.90481	4.49441
Vc24s64.33	WRKY(Vc24s64.33)	WRKY	Vc24s64.33	3.72762	3.88648	3.82758	0.150636	0.407003	0.788866	5.06815	4.90481	4.49441
Vc26a44.51	WRKY(Vc26a44.51)	WRKY	Vc26a44.51	1.88308	2.05725	1.75834	0	0	0	0.19473	0.138411	0.0490545
Vc34a51.32	WRKY(Vc34a51.32)	WRKY	Vc34a51.32	0.998361	0.564156	0.71215	0	0	0	2.71512	2.1188	2.29583
Vc35a230.25	WRKY(Vc35a230.25)	WRKY	Vc35a230.25	17.45	16.8983	18.4504	16.5322	14.0405	14.6557	0.0143857	0	0.0144957
Vc36a120.28	WRKY(Vc36a120.28)	WRKY	Vc36a120.28	10.3923	12.3999	12.1817	13.8673	11.3644	11.3343	0	0.0125159	0.0532293
Vc37a20.21	WRKY(Vc37a20.21)	WRKY	Vc37a20.21	11.1887	9.62624	10.3723	6.96837	8.04593	7.03438	2.15016	1.53714	1.54041
Vc39a109.22	WRKY(Vc39a109.22)	WRKY	Vc39a109.22	0.0906211	0.495015	0.20829	2.86159	4.58448	2.15752	0	0.0118416	0.0503615
Vc39a278.17	WRKY(Vc39a278.17)	WRKY	Vc39a278.17	15.7182	14.4458	13.4194	10.4913	10.7898	12.9727	4.39804	3.44505	4.6276
Vc40s189.38	WRKY(Vc40s189.38)	WRKY	Vc40s189.38	0.0591419	0.0861494	0.271872	0	0	0.0417202	3.65322	3.72496	4.05363
Vc41a176.26	WRKY(Vc41a176.26)	WRKY	Vc41a176.26	0.130916	0.10216	0.150453	0	0	0.0197895	3.52763	2.39008	3.11805
Vc42a227.32	WRKY(Vc42a227.32)	WRKY	Vc42a227.32	1.17243	1.44615	1.52126	0.229841	0.151413	0.460221	7.75946	6.27144	6.47359
Vc46a175.33	WRKY(Vc46a175.33)	WRKY	Vc46a175.33	2.46255	2.25927	2.12645	2.30536	2.15893	3.74302	0.0150072	0.0106669	0.181462
Vc46a175.33	WRKY(Vc46a175.33)	WRKY	Vc46a175.33	2.46255	2.25927	2.12645	2.30536	2.15893	3.74302	0.0150072	0.0106669	0.181462
Vc4a323.18	WRKY(Vc4a323.18)	WRKY	Vc4a323.18	30.3973	29.3344	30.0361	25.0781	23.7424	25.7789	0.016436	0	0
Vc51a4.26	WRKY(Vc51a4.26)	WRKY	Vc51a4.26	4.26329	4.02769	4.79913	2.03623	1.61523	2.18162	0.192729	0.287677	0.291303
Vc51s5.52	WRKY(Vc51s5.52)	WRKY	Vc51s5.52	21.4787	21.4009	21.8248	13.8703	12.5397	15.5959	0.416866	0.641989	0.560069
Vc6a98.16	WRKY(Vc6a98.16)	WRKY	Vc6a98.16	17.8582	14.1543	14.5317	12.2765	10.7807	12.1173	6.02252	4.67727	3.92077
Vc78a6.60	WRKY(Vc78a6.60)	WRKY	Vc78a6.60	0.662718	1.13324	0.849924	0.185407	0.321598	0.274401	2.82868	3.38863	2.1991
Vc78a6.60	WRKY(Vc78a6.60)	WRKY	Vc78a6.60	0.662718	1.13324	0.849924	0.185407	0.321598	0.274401	2.82868	3.38863	2.1991
Vc8p251.9	WRKY(Vc8p251.9)	WRKY	Vc8p251.9	16.301	17.3967	17.6013	13.8464	14.9648	12.1385	0.845362	0.934688	0.811259
Vc8p251.9	WRKY(Vc8p251.9)	WRKY	Vc8p251.9	16.301	17.3967	17.6013	13.8464	14.9648	12.1385	0.845362	0.934688	0.811259
Vc9a298.17	WRKY(Vc9a298.17)	WRKY	Vc9a298.17	3.65541	3.45347	4.05144	4.69683	3.72133	4.80394	0	0	0
Vc102a4.41	NAC(Vc102a4.41)	NAC	Vc102a4.41	7.03475	6.1328	5.67555	7.04904	9.09043	7.72569	0.587851	0.306413	0.394896
Vc12a75.23	NAC(Vc12a75.23)	NAC	Vc12a75.23	3.63265	3.22822	4.37728	2.84917	2.46663	2.71077	1.15126	1.20088	1.29564
Vc13a251.11	NAC(Vc13a251.11)	NAC	Vc13a251.11	2.31749	3.16005	2.34295	1.71921	1.40788	2.15722	0.0768811	0.136615	0.0774686
Vc14a236.21	NAC(Vc14a236.21)	NAC	Vc14a236.21	7.78508	10.0818	8.54978	24.3278	30.657	9.93684	0.269053	0.446225	0.406664
Vc16s24.34	NAC(Vc16s24.34)	NAC	Vc16s24.34	0.190249	0.253029	0.180616	0.201074	0.0963361	0.113783	1.93429	1.19977	1.82955
Vc17a123.28	NAC(Vc17a123.28)	NAC	Vc17a123.28	40.6299	31.5683	34.7148	57.5637	74.8913	71.4426	0.0732296	0	0.0184473
Vc18s373.39	NAC(Vc18s373.39)	NAC	Vc18s373.39	0.203407	0.106279	0.213435	0.145428	0.102999	0.0561476	1.90712	1.39715	1.70544
Vc1a421.18	NAC(Vc1a421.18)	NAC	Vc1a421.18	0.0320274	0.384887	0.294457	1.91202	2.49449	2.40615	0.37094	0.0878864	0.320379
Vc23a336.24	NAC(Vc23a336.24)	NAC	Vc23a336.24	5.71847	7.1601	9.18738	4.37685	3.44954	5.62416	1.89073	1.73917	2.30542
Vc24a120.21	NAC(Vc24a120.21)	NAC	Vc24a120.21	48.459	43.4293	44.9562	13.583	10.4028	19.9737	0.26901	0.172088	0.189746
Vc25a239.19	NAC(Vc25a239.19)	NAC	Vc25a239.19	1.79159	1.80161	1.31025	3.27509	4.89042	3.44682	0.0898276	0.0478861	0.29417
Vc27a85.25	NAC(Vc27a85.25)	NAC	Vc27a85.25	5.47399	7.74148	6.0466	7.52342	9.58098	8.07914	0.0195406	0	0
Vc2a13.19	NAC(Vc2a13.19)	NAC	Vc2a13.19	0.0494138	0.0809763	0.0567881	0	0	0	2.19385	2.90563	1.53782
Vc2a237.26	NAC(Vc2a237.26)	NAC	Vc2a237.26	3.93368	7.08261	4.54014	4.68337	3.33034	6.53833	0.558673	0.569172	0.450353
Vc2a281.20	NAC(Vc2a281.20)	NAC	Vc2a281.20	10.0173	12.5299	11.1547	17.1117	19.7463	13.6062	0.686304	0.699202	1.08343
Vc30a151.25	NAC(Vc30a151.25)	NAC	Vc30a151.25	9.84492	12.1651	10.6695	9.21455	7.8093	7.33068	0.324853	0.0989576	0.124699
Vc30a326.25	NAC(Vc30a326.25)	NAC	Vc30a326.25	2.35024	1.78307	1.96946	0.606786	0.582131	0.759878	0.0360057	0.0127962	0
Vc32a141.23	NAC(Vc32a141.23)	NAC	Vc32a141.23	8.24577	7.30321	7.2658	5.74888	4.96927	5.63882	0.243473	0.271946	0.192762
Vc338a0.27	NAC(Vc338a0.27)	NAC	Vc338a0.27	489.438	473.559	482.111	477.104	479.077	489.798	160.889	174.746	159.6
Vc36a198.14	NAC(Vc36a198.14)	NAC	Vc36a198.14	0.402595	0.499809	0.462676	1.15136	1.29209	1.33609	6.35841	5.60987	4.77982
Vc37a172.29	NAC(Vc37a172.29)	NAC	Vc37a172.29	3.01883	3.45436	4.09417	1.39117	1.29138	3.05809	23.2462	23.7919	23.3125
Vc38a136.22	NAC(Vc38a136.22)	NAC	Vc38a136.22	5.02889	5.95027	5.29943	1.67954	1.26663	4.56634	50.6915	50.0011	52.1813
Vc39a142.20	NAC(Vc39a142.20)	NAC	Vc39a142.20	8.29368	8.20669	8.3595	3.36582	3.38964	5.34104	73.3175	66.6903	60.4094
Vc3a158.19	NAC(Vc3a158.19)	NAC	Vc3a158.19	19.9208	18.3521	18.9106	30.4497	37.9558	14.5702	0.792148	0.660969	0.832906
Vc42a163.37	NAC(Vc42a163.37)	NAC	Vc42a163.37	2.8818	3.14835	2.56839	1.61887	1.51975	1.46244	0	0.0576381	0.0490262
Vc45a83.31	NAC(Vc45a83.31)	NAC	Vc45a83.31	13.3027	12.1964	14.6584	5.94899	6.13263	4.22282	0	0	0
Vc47a45.30	NAC(Vc47a45.30)	NAC	Vc47a45.30	0.572898	0.730201	0.951015	0.295823	0.764529	0.370458	10.5497	12.5268	12.01
Vc47a48.21	NAC(Vc47a48.21)	NAC	Vc47a48.21	6.18638	6.71943	5.64102	5.92584	5.1464	3.74059	58.8458	61.3777	57.9415
Vc4a256.12	NAC(Vc4a256.12)	NAC	Vc4a256.12	0.531098	0.542787	0.295334	1.21264	1.34683	1.21459	6.38738	6.32653	8.18805
Vc5a399.21	NAC(Vc5a399.21)	NAC	Vc5a399.21	0.382223	0.603165	0.715839	2.97566	4.0909	4.10436	0.5153	0.166485	0.330424
Vc665a0.12	NAC(Vc665a0.12)	NAC	Vc665a0.12	16.9244	16.1561	15.6498	28.6061	27.0907	28.1883	1.15545	1.67475	1.32408
Vc6a284.24	NAC(Vc6a284.24)	NAC	Vc6a284.24	2.02224	2.67546	2.38799	1.08768	0.999338	1.78644	12.647	12.8003	9.46491
Vc6a64.35	NAC(Vc6a64.35)	NAC	Vc6a64.35	14.8055	15.0505	15.3409	23.469	21.5195	26.1719	1.92131	2.52023	2.88639
Vc7s398.30	NAC(Vc7s398.30)	NAC	Vc7s398.30	0.367858	0.352672	0.353735	0.171758	0.0819693	0.0556064	1.73899	1.64806	2.18617
Vc8s30.29	NAC(Vc8s30.29)	NAC	Vc8s30.29	1.60994	2.07293	1.91628	11.5379	14.7323	15.0885	1.43758	1.00678	1.19293
Vc11s282.27	bZIP(Vc11s282.27)	bZIP	Vc11s282.27	0	0	0	0	0	0.0254291	13.1083	14.2066	17.3219
Vc13a291.15	bZIP(Vc13a291.15)	bZIP	Vc13a291.15	1.63541	1.56158	2.23465	0.580026	0.468672	1.28084	7.03107	6.45142	6.56954
Vc13p278.0	bZIP(Vc13p278.0)	bZIP	Vc13p278.0	22.473	22.1386	21.5117	12.0406	10.9323	14.6066	0.243623	0.43291	0.122742
Vc14s321.47	bZIP(Vc14s321.47)	bZIP	Vc14s321.47	0.482421	0.511071	0.0168005	0.49124	0.297952	0.12375	2.87029	2.79662	2.53475
Vc15a266.29	bZIP(Vc15a266.29)	bZIP	Vc15a266.29	0.0561149	0	0	0	0	0.0475019	41.4093	49.3367	52.5656
Vc169a0.20	bZIP(Vc169a0.20)	bZIP	Vc169a0.20	134.402	131.964	134.702	208.046	201.116	193.732	1.6913	1.26598	1.90029
Vc16a318.35	bZIP(Vc16a318.35)	bZIP	Vc16a318.35	1.60704	0.869318	1.48826	1.33861	1.38556	2.03066	0.120471	0.220188	0.416198
Vc18a2.21	bZIP(Vc18a2.21)	bZIP	Vc18a2.21	99.1064	106.677	109.058	170.996	160.903	168.05	0.656604	0.593988	0.818005
Vc18a83.29	bZIP(Vc18a83.29)	bZIP	Vc18a83.29	2.14232	2.92558	2.31484	4.30368	4.51719	3.44958	0.410968	0.337752	0.336463
Vc19s313.32	bZIP(Vc19s313.32)	bZIP	Vc19s313.32	0.0241685	0	0	0.00863979	0	0	20.4074	22.1795	20.5768
Vc21a363.31	bZIP(Vc21a363.31)	bZIP	Vc21a363.31	0	0.0119253	0	0.0312171	0	0.0231005	5.1533	7.16318	5.92063
Vc21p261.1	bZIP(Vc21p261.1)	bZIP	Vc21p261.1	0.0171092	0.0186917	0	0.0122325	0	0	3.54798	4.66811	4.14558
Vc24s118.41	bZIP(Vc24s118.41)	bZIP	Vc24s118.41	0.147129	0	0	0.00809166	0.0164763	0.0479023	82.2183	95.3259	98.7592
Vc26p252.4	bZIP(Vc26p252.4)	bZIP	Vc26p252.4	0	0	0	0.028081	0.0857681	0	7.45161	8.88394	8.55625
Vc26p350.1	bZIP(Vc26p350.1)	bZIP	Vc26p350.1	0	0	0	0.0558976	0.0243898	0.153638	4.06554	3.16119	4.3573
Vc29a338.24	bZIP(Vc29a338.24)	bZIP	Vc29a338.24	0.0104979	0.0344066	0.0241291	0.525392	0.374432	0.488761	13.8145	15.2267	11.3997
Vc2a371.35	bZIP(Vc2a371.35)	bZIP	Vc2a371.35	2.35778	2.64741	3.08598	2.62224	2.21681	2.81826	35.2303	28.4217	25.5752
Vc30a107.25	bZIP(Vc30a107.25)	bZIP	Vc30a107.25	0.929047	0.680431	0.66209	0.289443	0.272015	0.461324	2.95411	2.22589	2.71709
Vc30p123.4	bZIP(Vc30p123.4)	bZIP	Vc30p123.4	45.3324	51.8176	50.5113	20.8836	21.3822	30.0895	0	0.259746	0.184114
Vc31a259.18	bZIP(Vc31a259.18)	bZIP	Vc31a259.18	1.6428	1.82861	1.74548	2.48204	2.04189	2.37787	0.10257	0.437433	0.327288
Vc31p337.9	bZIP(Vc31p337.9)	bZIP	Vc31p337.9	25.1945	23.5517	27.1305	37.2888	37.2064	32.7986	0.150721	0.362595	0.280381
Vc32a100.29	bZIP(Vc32a100.29)	bZIP	Vc32a100.29	2.34411	3.47082	2.86376	0.864388	0.713808	2.72914	9.87588	8.50466	9.93642
Vc32p266.16	bZIP(Vc32p266.16)	bZIP	Vc32p266.16	12.3774	14.0243	12.5266	4.64767	5.78333	3.30029	0.0362143	0.102962	0.036491
Vc32p90.3	bZIP(Vc32p90.3)	bZIP	Vc32p90.3	30.2032	30.8252	34.0761	10.8168	9.84708	12.0358	0.0609058	0.043291	0
Vc33s15.29	bZIP(Vc33s15.29)	bZIP	Vc33s15.29	0.0126537	0.0414722	0.0872525	0.307595	0.469746	0.61591	7.62084	11.3891	6.77896
Vc37a189.24	bZIP(Vc37a189.24)	bZIP	Vc37a189.24	15.5062	17.1252	16.3403	24.3863	25.3486	21.1291	0.416122	0.203982	0.347009
Vc37s220.62	bZIP(Vc37s220.62)	bZIP	Vc37s220.62	7.92035	6.93618	7.32557	11.7513	12.9972	11.4784	0.0698919	0.218584	0.323959
Vc39a97.23	bZIP(Vc39a97.23)	bZIP	Vc39a97.23	15.2528	15.5785	15.6304	26.8517	27.2304	22.5496	0.401358	0.485747	0.437217
Vc3s37.43	bZIP(Vc3s37.43)	bZIP	Vc3s37.43	0.724712	1.31957	1.27706	0.639042	0.914372	0.562353	8.84657	9.67824	11.7334
Vc42a190.34	bZIP(Vc42a190.34)	bZIP	Vc42a190.34	26.6248	30.2327	28.7623	13.2179	13.542	14.1568	0.146841	0.130466	0.240441
Vc46s106.24	bZIP(Vc46s106.24)	bZIP	Vc46s106.24	0.657965	0.688871	0.535612	0.186208	0.379158	0.623695	25.0237	26.1908	24.377
Vc47p52.17	bZIP(Vc47p52.17)	bZIP	Vc47p52.17	1.14547	0.879372	0.675995	0.287745	0.101407	0.245688	29.9142	29.8793	29.4202
Vc6a323.25	bZIP(Vc6a323.25)	bZIP	Vc6a323.25	9.46034	10.2775	11.0546	18.2859	16.3247	17.5286	0.379461	0.238594	0.426479
Vc7a93.14	bZIP(Vc7a93.14)	bZIP	Vc7a93.14	4.11557	3.8045	3.44679	8.18414	5.21527	6.04741	0.312446	0.888327	1.22229
Vc7s24.27	bZIP(Vc7s24.27)	bZIP	Vc7s24.27	88.9365	90.0575	88.447	135.82	124.881	133.974	0.291179	0.301041	0.560135
Vc9a224.37	MADS-box(Vc9a224.37)	MADS-box	Vc9a224.37	10.1145	10.9235	11.0723	13.0073	11.1581	9.5465	0.0182599	0.0129789	0
Vc14a201.25	MADS-box(Vc14a201.25)	MADS-box	Vc14a201.25	22.516	24.1931	20.6441	27.1368	24.4582	38.4865	0.191047	0.21339	0.027501
Vc102a1.33	MADS-box(Vc102a1.33)	MADS-box	Vc102a1.33	7.48704	17.0615	6.10172	7.57717	7.38222	14.1109	0.0915073	0.0162605	0.0461032
Vc30a319.18	MADS-box(Vc30a319.18)	MADS-box	Vc30a319.18	1.48228	2.01923	2.29235	1.71396	2.95715	3.54355	0	0	0
Vc30s266.55	MADS-box(Vc30s266.55)	MADS-box	Vc30s266.55	1.42502	1.2937	1.24556	1.75068	2.133	4.58731	0.0221389	0	0
Vc30s274.40	MADS-box(Vc30s274.40)	MADS-box	Vc30s274.40	0	0.0247727	0	0	0	0	2.97643	3.30674	3.07478
Vc30a319.17	MADS-box(Vc30a319.17)	MADS-box	Vc30a319.17	1.71934	2.53231	2.51747	2.52226	3.09634	2.9513	0.0421445	0.239646	0.212333
Vc12a60.42	MADS-box(Vc12a60.42)	MADS-box	Vc12a60.42	59.241	61.1392	59.3325	20.3554	16.048	14.2098	0	0.145081	0.0587637
Vc20p204.0	MADS-box(Vc20p204.0)	MADS-box	Vc20p204.0	0.0465933	0.0254514	0.0267734	5.24672	4.37511	9.19485	0	0	0
Vc22s30.36	MADS-box(Vc22s30.36)	MADS-box	Vc22s30.36	36.2158	37.1877	38.4657	49.2204	47.0999	51.7451	0.0216284	0	0
Vc38a193.22	MADS-box(Vc38a193.22)	MADS-box	Vc38a193.22	0	0	0	3.81328	4.31061	5.58336	0	0	0
Vc2a240.26	MADS-box(Vc2a240.26)	MADS-box	Vc2a240.26	24.24	24.7603	27.5709	28.055	24.8987	31.5757	0.06253	0.0622235	0.0252031
Vc3a198.30	MADS-box(Vc3a198.30)	MADS-box	Vc3a198.30	63.4738	62.8594	66.8387	60.3078	55.9253	63.1745	0.420308	0.330196	0.312067
Vc7a410.40	MADS-box(Vc7a410.40)	MADS-box	Vc7a410.40	1.11967	1.03975	1.05086	0.800524	1.0731	1.08604	6.81334	8.1933	8.17211
Vc16a8.26	MADS-box(Vc16a8.26)	MADS-box	Vc16a8.26	0.488532	0.464102	0.520755	0.334096	0.386528	0.367098	7.32553	8.46535	7.34216
Vc16a6.47	MADS-box(Vc16a6.47)	MADS-box	Vc16a6.47	0.284345	0.155323	0.280097	0.261381	0.0887044	0.322368	3.94297	4.55424	4.60519
Vc18a37.32	MADS-box(Vc18a37.32)	MADS-box	Vc18a37.32	0.540209	0	0	0	0	0.254051	736.434	658.979	518.369
Vc36a95.18	MADS-box(Vc36a95.18)	MADS-box	Vc36a95.18	7.18344	7.54056	10.195	3.03203	2.51994	4.30422	0	0	0
Vc35p253.33	MADS-box(Vc35p253.33)	MADS-box	Vc35p253.33	6.18554	9.2738	6.93219	1.66233	0.973943	1.02123	0	0	0
Vc35a254.29	MADS-box(Vc35a254.29)	MADS-box	Vc35a254.29	57.58	56.7314	56.4432	24.4977	22.9246	20.5437	0	0.0347531	0.0246338
Vc13s88.16	MADS-box(Vc13s88.16)	MADS-box	Vc13s88.16	1.94867	1.27412	0.678631	1.91041	1.67635	3.15542	0	0	0
Vc13a88.12	MADS-box(Vc13a88.12)	MADS-box	Vc13a88.12	57.1321	59.5	57.8022	63.4204	61.3451	63.2915	0.0137596	0.00978016	0.0138648
Vc32a276.18	MADS-box(Vc32a276.18)	MADS-box	Vc32a276.18	1.67047	2.79717	2.97833	3.66111	3.5683	3.0396	0	0	0
Vc32a313.21	MADS-box(Vc32a313.21)	MADS-box	Vc32a313.21	4.35693	4.42672	5.33261	0.295929	0.380573	0.299665	1.34565	1.04187	1.23487
Vc32a276.19	MADS-box(Vc32a276.19)	MADS-box	Vc32a276.19	78.5548	80.9931	134.594	80.0626	127.629	150.745	0.13539	0.0481165	0.0227374
Vc28a145.15	MADS-box(Vc28a145.15)	MADS-box	Vc28a145.15	0.0157274	0	0.0180745	3.37335	2.67885	2.94559	0	0	0
Vc44a153.36	MADS-box(Vc44a153.36)	MADS-box	Vc44a153.36	0.0154512	0.118162	0	19.498	16.1957	19.8973	0	0	0
Vc39a214.16	MADS-box(Vc39a214.16)	MADS-box	Vc39a214.16	0	0.0237996	0.0250357	1.99363	2.20415	3.64209	0	0	0
Vc37p88.0	MADS-box(Vc37p88.0)	MADS-box	Vc37p88.0	0	0	0	1.64559	2.55961	3.36002	0	0	0

## Sheet: Table S8_DEFs_regulated
ID	ID	name	Ex_1	Ex_2	Ex_3	Sa_1	Sa_2	Sa_3	Se_1	Se_2	Se_3
bHLH(Vc11a352.34)	Vc11a352.34	bHLH	13.638	16.612	14.8206	8.65231	7.03651	8.07245	1.75217	2.48264	2.29987
bHLH(Vc17s157.22)	Vc17s157.22	bHLH	2.70006	3.48509	3.90572	2.57144	3.03535	4.11458	40.7991	45.7795	47.194
bHLH(Vc23a314.44)	Vc23a314.44	bHLH	2.3318	1.57943	2.60832	4.51241	3.30413	3.14177	11.8315	13.4677	11.2654
bHLH(Vc27s117.30)	Vc27s117.30	bHLH	3.72648	2.94772	2.26598	3.75699	3.30997	3.444	56.8909	64.6981	61.7716
bHLH(Vc30a304.40)	Vc30a304.40	bHLH	1.64811	1.59179	5.07829	6.04538	3.70332	5.43397	16.0716	20.0753	30.3977
bHLH(Vc34a66.24)	Vc34a66.24	bHLH	106.814	118.189	125.441	195.194	198.423	170.808	2.67021	3.10216	2.6535
bHLH(Vc43p33.1)	Vc43p33.1	bHLH	15.4335	13.0986	14.4467	15.8169	16.4334	14.7861	6.12794	5.06677	6.11175
bHLH(Vc50a11.22)	Vc50a11.22	bHLH	34.4766	34.7129	39.1729	53.4314	54.9559	65.0112	2.15389	1.67793	1.31957
bHLH(Vc662a0.10)	Vc662a0.10	bHLH	29.7375	30.5086	28.1766	22.8651	25.048	25.5018	7.77219	9.35758	9.28601
bHLH(Vc6a50.33)	Vc6a50.33	bHLH	47.1294	53.6136	45.8265	39.5483	40.6035	43.1158	14.8403	16.2831	15.1114
bHLH(Vc81a6.37)	Vc81a6.37	bHLH	81.3142	75.5245	81.6788	111.392	108.9	92.0446	3.6258	3.57221	2.84946
bZIP(Vc169a0.20)	Vc169a0.20	bZIP	134.402	131.964	134.702	208.046	201.116	193.732	1.6913	1.26598	1.90029
bZIP(Vc23s187.33)	Vc23s187.33	bZIP	3.552	4.70368	4.41196	4.45063	4.30921	4.25205	1.82049	1.06894	1.79453
bZIP(Vc2a371.35)	Vc2a371.35	bZIP	2.35778	2.64741	3.08598	2.62224	2.21681	2.81826	35.2303	28.4217	25.5752
bZIP(Vc32a210.40)	Vc32a210.40	bZIP	1.86529	1.44465	1.49956	1.67798	2.68364	2.15906	17.2231	16.5675	13.5781
MYB(Vc15a315.33)	Vc15a315.33	MYB	7.29335	8.3608	7.78769	7.54451	8.39276	11.2253	1.4875	1.33042	1.38645
MYB(Vc17a20.19)	Vc17a20.19	MYB	6.90033	7.27171	6.45638	2.67412	2.30026	1.9223	17.9002	15.6915	10.7916
MYB(Vc32a298.24)	Vc32a298.24	MYB	5.28776	4.1765	5.57048	2.73323	3.21616	7.51064	1.6158	1.54065	1.98554
MYB(Vc34p141.22)	Vc34p141.22	MYB	8.00135	7.22538	6.68451	10.7236	9.24141	11.1533	1.62838	1.713	1.60801
MYB(Vc35a146.23)	Vc35a146.23	MYB	1.68545	1.59214	1.64571	1.22315	1.12538	1.22025	11.7139	11.6446	12.0428
MYB(Vc42a127.23)	Vc42a127.23	MYB	4.32708	4.07458	3.07941	8.67272	10.4507	9.00403	1.91717	3.32157	2.61601
MYB(Vc44s239.19)	Vc44s239.19	MYB	15.7678	15.2059	16.7836	12.46	11.484	11.9979	1.62184	1.83172	1.70442
NAC(Vc12a75.23)	Vc12a75.23	NAC	3.63265	3.22822	4.37728	2.84917	2.46663	2.71077	1.15126	1.20088	1.29564
NAC(Vc23a336.24)	Vc23a336.24	NAC	5.71847	7.1601	9.18738	4.37685	3.44954	5.62416	1.89073	1.73917	2.30542
NAC(Vc338a0.27)	Vc338a0.27	NAC	489.438	473.559	482.111	477.104	479.077	489.798	160.889	174.746	159.6
NAC(Vc37a172.29)	Vc37a172.29	NAC	3.01883	3.45436	4.09417	1.39117	1.29138	3.05809	23.2462	23.7919	23.3125
NAC(Vc38a136.22)	Vc38a136.22	NAC	5.02889	5.95027	5.29943	1.67954	1.26663	4.56634	50.6915	50.0011	52.1813
NAC(Vc39a142.20)	Vc39a142.20	NAC	8.29368	8.20669	8.3595	3.36582	3.38964	5.34104	73.3175	66.6903	60.4094
NAC(Vc47a48.21)	Vc47a48.21	NAC	6.18638	6.71943	5.64102	5.92584	5.1464	3.74059	58.8458	61.3777	57.9415
NAC(Vc665a0.12)	Vc665a0.12	NAC	16.9244	16.1561	15.6498	28.6061	27.0907	28.1883	1.15545	1.67475	1.32408
NAC(Vc6a64.35)	Vc6a64.35	NAC	14.8055	15.0505	15.3409	23.469	21.5195	26.1719	1.92131	2.52023	2.88639
NAC(Vc8s30.29)	Vc8s30.29	NAC	1.60994	2.07293	1.91628	11.5379	14.7323	15.0885	1.43758	1.00678	1.19293
WD40(Novel0710)	Novel0710	WD40	6.21452	6.68996	6.51486	2.18906	2.82449	4.90781	2.29054	1.73503	1.73524
WD40(Vc35a238.21)	Vc35a238.21	WD40	11.9098	11.944	13.2156	19.4331	17.9927	16.3446	4.59096	5.12458	5.29931
WD40(Vc36a113.26)	Vc36a113.26	WD40	13.2523	13.2489	11.6505	20.584	19.8446	22.0806	5.47355	5.78471	5.83129
WD40(Vc45a174.26)	Vc45a174.26	WD40	19.1853	20.0567	18.9775	27.516	22.4868	28.1931	1.20866	1.65791	1.32473
WD40(Vc4a330.17)	Vc4a330.17	WD40	35.0851	31.2086	35.5099	57.5225	56.2863	48.9889	12.4794	14.5148	12.7357
WD40(Vc8s153.31)	Vc8s153.31	WD40	16.6611	16.6134	17.2808	26.6334	23.8951	25.3396	8.39547	8.62359	8.78632
WRKY(Vc24a3.26)	Vc24a3.26	WRKY	9.12304	9.98407	10.2129	1.32931	1.22721	1.66726	1.44255	1.32183	1.38352
WRKY(Vc37a20.21)	Vc37a20.21	WRKY	11.1887	9.62624	10.3723	6.96837	8.04593	7.03438	2.15016	1.53714	1.54041
WRKY(Vc39a278.17)	Vc39a278.17	WRKY	15.7182	14.4458	13.4194	10.4913	10.7898	12.9727	4.39804	3.44505	4.6276
WRKY(Vc6a98.16)	Vc6a98.16	WRKY	17.8582	14.1543	14.5317	12.2765	10.7807	12.1173	6.02252	4.67727	3.92077
