# Supplementary material for: Integrated Untargeted Metabolome, Full-Length Sequencing and Transcriptome Analyses Reveal the Mechanism of Flavonoid Biosynthesis in Blueberry (Vaccinium spp.) Fruit
Source: Int J Mol Sci. 2024 Apr 9;25(8):4137. doi: 10.3390/ijms25084137 (PMC11050320; doi:10.3390/ijms25084137)
Supplement: Supplementary file 1 [file ijms-25-04137-s001.zip › Table S9. Primer sequences for qRT-PCR.xlsx]

## Sheet: Table S9
Table S9. Primer sequences for qRT-PCR in this study.
Gene name	Forward primers	Reverse primers
EF1α	TGGAAATGGGTATGCCCCAG	CCATACCGGCATCTCCATTC
VcC3'H	TGGGAAACGGTTCGTGAATT	TCAGGCCGTTCTCCGAAATC
VcC4H1	CCCATCCCCGTACCCATATT	TTGGCTAGGTCGGTGAGGTT
VcC4H2	CCCATCCCCGTACCCATATT	TTGGCTAGGTCGGTGAGGTT
VcC4H3	CGCACATGAACCTCCACGAT	CCACCACGCGTTAACCAAGAT
VcCHI	GGGAGAGAGGTTTGGAGATTGA	ACTCTACGGCGCTAACTTGTAGGT
VcCHS	GCTGAGCGAGTACGGTAACATG	CATCTTCGGCCGACTTCTTC
VcDFR1	TCGCGATCCAGGCAATTT	CCTTCCACAGCGTTAGGTTTG
VcDFR2	GGCGAAAACAATGGCTGAGA	CAGAAGGGTGAACGGTTACAAGA
VcF3'5'H1	AGCCGAGCCAGTGGTGATAT	CGCGACGCTTGAGTATGACTT
VcF3'5'H2	AGCCGAGCCAGTGGTGATAT	CGCGACGCTTGAGTATGACTT
VcF3'5'H3	GCCAGTGGTGATATCGGAAATG	CAAACACGCGACGCTTGAGT
VcF3H1	GAAGGCGCTTTCGTTGTCAA	GCTTGGTGATCCGCGTTCTT
VcF3H2	AGGCCACTAGAGATGGTGGAAA	ATGGTCGCCCAAATTGACA
VcFLS	GGTGTTGAGCAACGGGAAGTA	CAGCCCAGGACATCCTTGTT
VcHCT	CCCGGATGGATGACGATTAT	TCGAAGTAGAGCCGGTGGAT
VcLDOX1	GAAAAAGAAGTTGGCGGAAAGG	AGCTCCGGTTGAGGGCATTT
VcLDOX2	GAAAAAGAAGTTGGCGGAAAGG	AGCTCCGGTTGAGGGCATTT
VcPAL	ATGATCCGTGTAGTGCGACGTA	GTCGGTGTTGGTCAGTGCAT
