# Supplementary figures and images for: Integrated Untargeted Metabolome, Full-Length Sequencing and Transcriptome Analyses Reveal the Mechanism of Flavonoid Biosynthesis in Blueberry (Vaccinium spp.) Fruit
Source: MDPI journal article supplement (doi:10.3390/ijms25084137), 2024-04-09

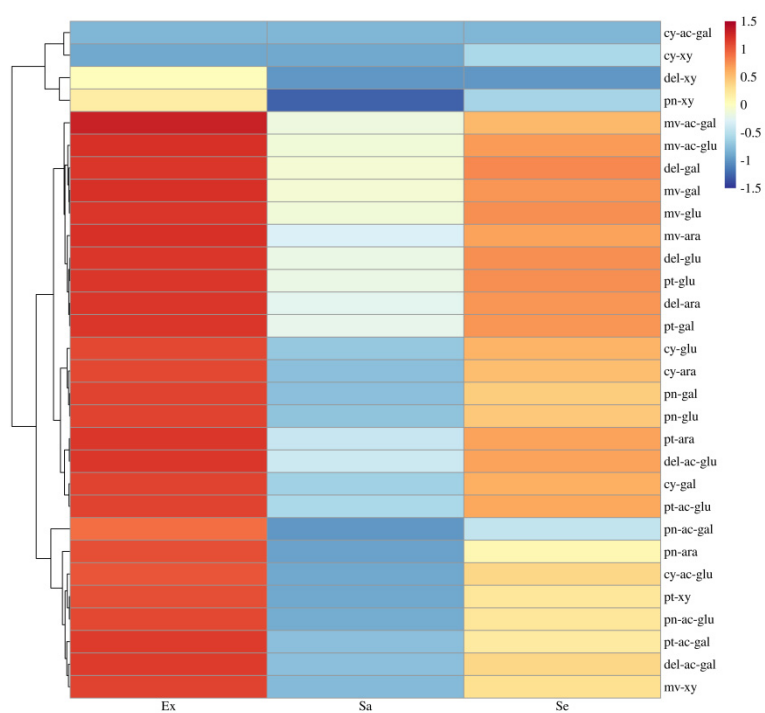

Figure S2. Heatmap of the contents of 30 anthocyanins in blueberry fruit tissues.

Supplement: s1 [file s1]
